# Supplementary material for: Traceability and Quality Control in Traditional Chinese Medicine: From Chemical Fingerprint to Two-Dimensional Barcode
Source: Evid Based Complement Alternat Med. 2015 May 18;2015:251304. doi: 10.1155/2015/251304 (PMC4451286; doi:10.1155/2015/251304)
Supplement: Supplementary file 1 — Supplementary Table S1: shows the main difference between the one dimension and two-dimensional code. Supplementary Table S2: shows a total of 53 types of one dimension codes and 14 types of two-dimensional codes tested in this study. [file 251304.f1.zip]

Archive with 14 entries (11 files):
- File S2-filtering excel data/
- File S2-filtering excel data/final_MUDANPI.xls
- File S2-filtering excel data/final_roucongrong.xls
- File S2-filtering excel data/final_Yinyanghuo.xls
- File S3-filtered files/
- File S3-filtered files/final_MUDANPI.txt
- File S3-filtered files/final_roucongrong.txt
- File S3-filtered files/final_yinyanghuo_new.txt
- file-s1/
- file-s1/MUDANPI.DIF
- file-s1/roucongrong.DIF
- file-s1/yinyanghuo.DIF
- s1.doc
- s2.doc
