# Supplementary material for: Traceability and Quality Control in Traditional Chinese Medicine: From Chemical Fingerprint to Two-Dimensional Barcode
Source: Evid Based Complement Alternat Med. 2015 May 18;2015:251304. doi: 10.1155/2015/251304 (PMC4451286; doi:10.1155/2015/251304)
Supplement: Supplementary file 1 — Supplementary Table S1: shows the main difference between the one dimension and two-dimensional code. Supplementary Table S2: shows a total of 53 types of one dimension codes and 14 types of two-dimensional codes tested in this study. [file 251304.f1.zip › File S2-filtering excel data/final_MUDANPI.xls]

## Sheet: Worksheet1
0	0
2	1
2.1	3
2.2	2
2.3	4
2.4	5
2.5	12
2.6	10
2.7	10
2.8	831
3	8
3.1	6
3.2	5
3.4	6
3.5	6
3.6	7
3.7	183
3.8	11
3.9	10
4	57
4.1	62
4.2	17
4.3	18
4.4	84
4.6	39
4.8	547
5	7
5.1	8
5.2	7
5.3	5
5.4	6
5.5	5
5.6	4
5.8	5
6.2	6
6.3	9
6.4	29
6.5	8
6.6	9
6.7	19
6.8	12
6.9	9
7	8
7.1	16
7.2	22
7.3	17
7.4	12
7.5	9
7.6	8
7.7	8
7.8	10
8.1	12
8.2	16
8.3	11
8.4	9
8.5	8
8.6	7
8.7	8
8.8	11
8.9	11
9	9
9.1	10
9.2	166
9.4	19
9.5	16
9.6	14
9.7	11
9.8	13
9.9	14
10	16
10.1	30
10.2	16
10.4	46
10.5	27
10.6	27
10.7	11
10.8	10
10.9	11
11	13
11.1	20
11.2	27
11.3	28
11.4	11
11.6	13
11.8	70
12	18
12.1	17
12.2	47
12.3	14
12.4	13
12.5	14
12.6	16
12.7	15
12.8	14
12.9	22
13	25
13.1	26
13.2	27
13.3	48
13.4	28
13.5	20
13.6	15
13.7	15
13.8	17
13.9	17
14	16
14.1	21
14.3	65
14.4	21
14.5	21
14.6	17
14.7	15
14.8	17
14.9	23
15	28
15.1	31
15.2	58
15.3	51
15.4	51
15.5	22
15.6	25
15.7	31
16	207
16.2	57
16.3	84
16.4	30
16.5	26
16.6	29
16.7	27
16.8	24
16.9	23
17	30
17.1	40
17.2	37
17.3	35
17.4	34
17.5	40
17.6	45
17.9	1156
18.1	30
18.2	29
18.3	31
18.4	66
18.6	30
18.7	31
18.8	43
18.9	44
19	29
19.1	28
19.2	32
19.3	33
19.5	184
19.6	147
19.7	183
19.8	121
19.9	135
20	135
20.1	195
20.3	45
20.4	43
20.5	42
20.6	44
20.7	61
20.8	30
20.9	35
21	46
21.1	56
21.2	63
21.4	111
21.5	96
21.6	96
21.7	75
21.8	72
21.9	73
22	73
22.1	49
22.2	49
22.3	42
22.4	42
22.5	44
22.7	53
22.8	59
22.9	60
23	58
23.1	51
23.2	51
23.3	52
23.4	48
23.5	46
23.6	38
23.7	34
23.8	35
24	66
24.1	29
24.2	26
24.3	25
24.5	24
24.6	24
24.7	21
24.8	20
24.9	19
25.1	23
25.2	46
25.4	15
25.5	12
25.7	11
25.8	12
25.9	18
26	17
26.1	10
26.2	9
26.5	8
26.6	7
26.7	8
26.8	7
27	6
27.2	5
28	4
28.3	3
28.6	9
28.7	10
28.8	5
28.9	3
29.2	2
29.3	1
29.5	2
29.6	1
29.7	6
29.8	18
29.9	6
30	2
30.4	4
30.5	7
30.6	3
30.7	1
30.9	2
31	1
31.2	0
31.4	1
31.7	2
31.8	4
31.9	3
32	1
32.4	0
32.5	1
33.2	0
33.3	1
33.4	1
34.3	1
34.4	2
34.5	1
34.9	1
37.8	1
38.2	2931
38.6	11
38.7	6
38.8	4
38.9	3
39	2
39.2	1
57.3	0
57.4	1
57.9	0
58.3	1
59.1	2
59.4	2
59.5	5
59.6	2
59.7	1
60.8	0
60.9	1
62.3	0
62.4	1
63.1	0
63.7	1
64	2
64.7	1
64.8	0
66.2	1
66.5	0
66.7	1
66.9	2
67.2	1
67.8	0
67.9	1
68.2	0
68.6	1
68.7	2
68.8	11
71.8	0
73.4	1
