# Supplementary material for: Traceability and Quality Control in Traditional Chinese Medicine: From Chemical Fingerprint to Two-Dimensional Barcode
Source: Evid Based Complement Alternat Med. 2015 May 18;2015:251304. doi: 10.1155/2015/251304 (PMC4451286; doi:10.1155/2015/251304)
Supplement: Supplementary file 1 — Supplementary Table S1: shows the main difference between the one dimension and two-dimensional code. Supplementary Table S2: shows a total of 53 types of one dimension codes and 14 types of two-dimensional codes tested in this study. [file 251304.f1.zip › File S2-filtering excel data/final_roucongrong.xls]

## Sheet: Worksheet1
0	0
0.3	1
0.4	294
0.5	186
0.6	3
0.7	27
0.8	23
0.9	20
1	15
1.1	13
1.2	10
1.3	49
1.4	49
1.5	10
1.6	7
1.7	6
1.8	6
2	7
2.1	31
2.3	7
2.5	6
2.6	7
2.7	7
2.8	8
2.9	6
3	5
3.1	7
3.2	54
3.3	53
3.4	12
3.5	10
3.6	7
3.7	7
3.9	74
4.1	21
4.2	26
4.3	23
4.4	28
4.5	17
4.6	8
4.7	5
4.8	4
5.1	4
5.3	3
5.4	2
5.5	4
5.7	5
5.8	4
5.9	3
6.1	2
6.4	1
6.6	2
6.7	4
6.9	5
7	4
7.1	3
7.4	2
7.6	3
7.7	2
8	2
8.1	3
8.2	4
8.3	2
8.7	1
9.2	0
9.4	1
9.7	0
10	1
10.4	0
10.6	1
10.8	2
10.9	1
11	0
11.7	1
14.3	0
14.5	1
16.3	5
16.5	22
16.6	17
16.7	24
16.8	24
16.9	15
17	5
17.1	1
19	1
19.3	71
19.5	6
19.6	2
19.7	1
20.6	3
20.7	22
20.8	20
20.9	10
21	4
21.1	1
22.3	4
22.4	16
22.5	20
22.6	14
22.7	7
22.8	3
22.9	2
23	1
23.8	2
23.9	6
24	6
24.1	3
24.2	1
34.3	0
34.5	1
