# Supplementary material for: Traceability and Quality Control in Traditional Chinese Medicine: From Chemical Fingerprint to Two-Dimensional Barcode
Source: Evid Based Complement Alternat Med. 2015 May 18;2015:251304. doi: 10.1155/2015/251304 (PMC4451286; doi:10.1155/2015/251304)
Supplement: Supplementary file 1 — Supplementary Table S1: shows the main difference between the one dimension and two-dimensional code. Supplementary Table S2: shows a total of 53 types of one dimension codes and 14 types of two-dimensional codes tested in this study. [file 251304.f1.zip › File S2-filtering excel data/final_Yinyanghuo.xls]

## Sheet: Worksheet1
0	0
1	0
1.1	1
1.6	0
1.9	2
2	7
2.2	61
2.3	11
2.4	14
2.5	23
2.6	22
2.7	3
3	4
3.1	11
3.2	20
3.3	28
3.4	11
3.5	6
3.8	5
3.9	6
4	6
4.1	4
4.8	3
5	2
5.1	3
5.2	4
5.3	3
5.6	3
5.7	7
5.8	11
5.9	16
6	24
6.1	8
6.2	6
6.3	4
6.4	5
6.5	4
6.7	2
6.8	4
6.9	4
7.5	3
7.8	3
8.1	4
8.3	3
8.4	2
8.5	3
8.6	4
8.7	3
8.8	4
8.9	3
9.4	2
9.5	3
9.8	2
9.9	1
10.1	3
10.3	4
10.4	3
10.9	3
11	4
11.1	3
11.3	2
11.5	3
11.8	2
11.9	3
12	2
12.1	1
12.2	2
12.3	1
12.5	2
14.1	1
14.3	2
15.4	2
15.5	9
15.6	12
15.7	4
15.8	2
16.6	2
16.7	12
16.8	15
16.9	5
17	3
17.1	2
17.6	3
17.7	6
17.8	24
18	4
18.1	3
18.4	2
18.5	5
18.7	123
19	7
19.2	7
19.3	13
19.4	9
19.5	6
19.6	6
19.7	8
19.8	6
19.9	7
20.1	94
20.3	6
20.4	5
21	5
21.2	4
21.3	5
21.5	6
21.6	8
21.7	39
21.9	4
22.1	3
22.5	1
22.6	2
22.7	9
22.8	4
22.9	3
23	5
23.1	4
23.2	3
23.5	1
23.6	3
23.7	3
24.1	3
24.3	2
24.7	1
24.8	2
25	1
25.2	3
25.3	2
25.7	1
25.8	2
26.6	2
26.9	2
27.1	1
27.3	0
27.8	1
28	2
28.3	1
28.5	2
29.1	1
29.3	0
29.5	1
30.2	0
30.3	1
33.9	1
34	2
34.2	2
34.4	1
37.7	1
37.8	2
37.9	4
38	3
38.1	2
38.2	3
38.3	10
38.4	13
38.5	10
38.6	5
38.7	2
38.8	1
40.2	0
40.5	1
44.8	0
44.9	4
45	17
45.1	3
45.2	2
45.7	4
45.8	2
46.1	1
46.6	0
46.7	1
47.6	0
47.7	1
47.8	0
47.9	1
48.1	0
48.2	1
48.3	1
49.6	0
49.7	1
50.3	0
50.7	1
50.9	0
57.6	8
57.9	1
