# Supplementary material for: Traceability and Quality Control in Traditional Chinese Medicine: From Chemical Fingerprint to Two-Dimensional Barcode
Source: Evid Based Complement Alternat Med. 2015 May 18;2015:251304. doi: 10.1155/2015/251304 (PMC4451286; doi:10.1155/2015/251304)
Supplement: Supplementary file 1 — Supplementary Table S1: shows the main difference between the one dimension and two-dimensional code. Supplementary Table S2: shows a total of 53 types of one dimension codes and 14 types of two-dimensional codes tested in this study. [file 251304.f1.zip › File S3-filtered files/final_MUDANPI.txt]

0,0;2,1;2.1,3;2.2,2;2.3,4;2.4,5;2.5,12;2.6,10;2.7,10;2.8,831;3,8;3.1,6;3.2,5;3.4,6;3.5,6;3.6,7;3.7,183;3.8,11;3.9,10;4,57;4.1,62;4.2,17;4.3,18;4.4,84;4.6,39;4.8,547;5,7;5.1,8;5.2,7;5.3,5;5.4,6;5.5,5;5.6,4;5.8,5;6.2,6;6.3,9;6.4,29;6.5,8;6.6,9;6.7,19;6.8,12;6.9,9;7,8;7.1,16;7.2,22;7.3,17;7.4,12;7.5,9;7.6,8;7.7,8;7.8,10;8.1,12;8.2,16;8.3,11;8.4,9;8.5,8;8.6,7;8.7,8;8.8,11;8.9,11;9,9;9.1,10;9.2,166;9.4,19;9.5,16;9.6,14;9.7,11;9.8,13;9.9,14;10,16;10.1,30;10.2,16;10.4,46;10.5,27;10.6,27;10.7,11;10.8,10;10.9,11;11,13;11.1,20;11.2,27;11.3,28;11.4,11;11.6,13;11.8,70;12,18;12.1,17;12.2,47;12.3,14;12.4,13;12.5,14;12.6,16;12.7,15;12.8,14;12.9,22;13,25;13.1,26;13.2,27;13.3,48;13.4,28;13.5,20;13.6,15;13.7,15;13.8,17;13.9,17;14,16;14.1,21;14.3,65;14.4,21;14.5,21;14.6,17;14.7,15;14.8,17;14.9,23;15,28;15.1,31;15.2,58;15.3,51;15.4,51;15.5,22;15.6,25;15.7,31;16,207;16.2,57;16.3,84;16.4,30;16.5,26;16.6,29;16.7,27;16.8,24;16.9,23;17,30;17.1,40;17.2,37;17.3,35;17.4,34;17.5,40;17.6,45;17.9,1156;18.1,30;18.2,29;18.3,31;18.4,66;18.6,30;18.7,31;18.8,43;18.9,44;19,29;19.1,28;19.2,32;19.3,33;19.5,184;19.6,147;19.7,183;19.8,121;19.9,135;20,135;20.1,195;20.3,45;20.4,43;20.5,42;20.6,44;20.7,61;20.8,30;20.9,35;21,46;21.1,56;21.2,63;21.4,111;21.5,96;21.6,96;21.7,75;21.8,72;21.9,73;22,73;22.1,49;22.2,49;22.3,42;22.4,42;22.5,44;22.7,53;22.8,59;22.9,60;23,58;23.1,51;23.2,51;23.3,52;23.4,48;23.5,46;23.6,38;23.7,34;23.8,35;24,66;24.1,29;24.2,26;24.3,25;24.5,24;24.6,24;24.7,21;24.8,20;24.9,19;25.1,23;25.2,46;25.4,15;25.5,12;25.7,11;25.8,12;25.9,18;26,17;26.1,10;26.2,9;26.5,8;26.6,7;26.7,8;26.8,7;27,6;27.2,5;28,4;28.3,3;28.6,9;28.7,10;28.8,5;28.9,3;29.2,2;29.3,1;29.5,2;29.6,1;29.7,6;29.8,18;29.9,6;30,2;30.4,4;30.5,7;30.6,3;30.7,1;30.9,2;31,1;31.2,0;31.4,1;31.7,2;31.8,4;31.9,3;32,1;32.4,0;32.5,1;33.2,0;33.3,1;33.4,1;34.3,1;34.4,2;34.5,1;34.9,1;37.8,1;38.2,2931;38.6,11;38.7,6;38.8,4;38.9,3;39,2;39.2,1;57.3,0;57.4,1;57.9,0;58.3,1;59.1,2;59.4,2;59.5,5;59.6,2;59.7,1;60.8,0;60.9,1;62.3,0;62.4,1;63.1,0;63.7,1;64,2;64.7,1;64.8,0;66.2,1;66.5,0;66.7,1;66.9,2;67.2,1;67.8,0;67.9,1;68.2,0;68.6,1;68.7,2;68.8,11;71.8,0;73.4,1;
