# Supplementary material for: Traceability and Quality Control in Traditional Chinese Medicine: From Chemical Fingerprint to Two-Dimensional Barcode
Source: Evid Based Complement Alternat Med. 2015 May 18;2015:251304. doi: 10.1155/2015/251304 (PMC4451286; doi:10.1155/2015/251304)
Supplement: Supplementary file 1 — Supplementary Table S1: shows the main difference between the one dimension and two-dimensional code. Supplementary Table S2: shows a total of 53 types of one dimension codes and 14 types of two-dimensional codes tested in this study. [file 251304.f1.zip › File S3-filtered files/final_roucongrong.txt]

0,0;0.3,1;0.4,294;0.5,186;0.6,3;0.7,27;0.8,23;0.9,20;1,15;1.1,13;1.2,10;1.3,49;1.4,49;1.5,10;1.6,7;1.7,6;1.8,6;2,7;2.1,31;2.3,7;2.5,6;2.6,7;2.7,7;2.8,8;2.9,6;3,5;3.1,7;3.2,54;3.3,53;3.4,12;3.5,10;3.6,7;3.7,7;3.9,74;4.1,21;4.2,26;4.3,23;4.4,28;4.5,17;4.6,8;4.7,5;4.8,4;5.1,4;5.3,3;5.4,2;5.5,4;5.7,5;5.8,4;5.9,3;6.1,2;6.4,1;6.6,2;6.7,4;6.9,5;7,4;7.1,3;7.4,2;7.6,3;7.7,2;8,2;8.1,3;8.2,4;8.3,2;8.7,1;9.2,0;9.4,1;9.7,0;10,1;10.4,0;10.6,1;10.8,2;10.9,1;11,0;11.7,1;14.3,0;14.5,1;16.3,5;16.5,22;16.6,17;16.7,24;16.8,24;16.9,15;17,5;17.1,1;19,1;19.3,71;19.5,6;19.6,2;19.7,1;20.6,3;20.7,22;20.8,20;20.9,10;21,4;21.1,1;22.3,4;22.4,16;22.5,20;22.6,14;22.7,7;22.8,3;22.9,2;23,1;23.8,2;23.9,6;24,6;24.1,3;24.2,1;34.3,0;34.5,1;
