# Supplementary material for: Traceability and Quality Control in Traditional Chinese Medicine: From Chemical Fingerprint to Two-Dimensional Barcode
Source: Evid Based Complement Alternat Med. 2015 May 18;2015:251304. doi: 10.1155/2015/251304 (PMC4451286; doi:10.1155/2015/251304)
Supplement: Supplementary file 1 — Supplementary Table S1: shows the main difference between the one dimension and two-dimensional code. Supplementary Table S2: shows a total of 53 types of one dimension codes and 14 types of two-dimensional codes tested in this study. [file 251304.f1.zip › File S3-filtered files/final_yinyanghuo_new.txt]

0,0;1.1,1;1.5,0;1.6,1;1.8,2;1.9,4;2,10;2.2,91;2.3,16;2.4,14;2.5,30;2.6,30;2.7,4;3,6;3.1,14;3.3,36;3.4,9;3.5,7;3.7,6;3.9,5;4,7;4.1,8;4.2,7;4.3,6;4.4,12;4.5,5;4.7,4;5.1,3;5.3,4;5.8,3;5.9,5;6,39;6.1,12;6.2,7;6.3,6;6.5,5;6.6,4;6.8,3;6.9,4;7,3;7.4,2;7.5,3;7.8,2;8,3;8.5,3;8.6,4;8.7,3;9.4,2;9.6,3;9.7,2;10,1;10.2,2;10.4,3;10.6,2;10.7,2;10.8,1;11.2,2;11.3,1;12.1,2;15.5,1;15.6,5;15.7,6;15.8,3;15.9,2;16.7,3;16.8,13;16.9,15;17,5;17.1,3;17.2,2;17.7,3;17.8,6;17.9,23;18,11;18.1,3;18.2,2;18.5,1;18.6,4;18.8,55;19,6;19.1,3;19.4,6;19.5,4;19.7,3;19.8,4;20,4;20.2,75;20.3,7;20.4,4;20.6,3;20.7,3;20.9,2;21.1,3;21.4,2;21.5,3;21.6,2;21.7,5;21.8,4;21.9,3;22.1,2;22.2,3;23,3;23.1,5;23.2,3;24.7,2;25.2,1;25.4,2;26.9,1;27,2;27.6,1;27.7,2;28.3,0;29.2,1;29.4,0;29.8,1;30.2,0;30.5,1;31.3,0;31.5,1;33.9,0;34,1;34.1,3;34.3,4;34.4,2;34.6,1;37.8,1;37.9,4;38,5;38.1,4;38.2,3;38.3,2;38.4,7;38.5,11;38.6,11;38.7,5;38.8,2;38.9,1;40.4,0;40.5,1;44.8,0;44.9,2;45,43;45.2,2;45.7,1;45.8,2;46.5,0;47.4,1;47.5,0;47.6,1;47.9,0;48,1;48.1,0;49.9,2;50.5,2;51.7,2;53.3,1;53.4,2;53.5,1;53.7,2;55.4,1;55.8,2;57.6,9;57.7,2;58,1;
