# Supplementary material for: Traceability and Quality Control in Traditional Chinese Medicine: From Chemical Fingerprint to Two-Dimensional Barcode
Source: Evid Based Complement Alternat Med. 2015 May 18;2015:251304. doi: 10.1155/2015/251304 (PMC4451286; doi:10.1155/2015/251304)
Supplement: Supplementary file 1 — Supplementary Table S1: shows the main difference between the one dimension and two-dimensional code. Supplementary Table S2: shows a total of 53 types of one dimension codes and 14 types of two-dimensional codes tested in this study. [file 251304.f1.zip › file-s1/MUDANPI.DIF]

TABLE
0,1
"HP ChemStation DIF Output"
VECTORS
0,2
""
TUPLES
0,11250  
""
DATA
0,0
""
-1,0
BOT
0,0.00645
V
0,-0.0553131103515625
V
-1,0
BOT
0,0.0131166666666667
V
0,-0.0543594360351563
V
-1,0
BOT
0,0.0197833333333333
V
0,-0.0529289245605469
V
-1,0
BOT
0,0.02645
V
0,-0.0514984130859375
V
-1,0
BOT
0,0.0331166666666667
V
0,-0.0500679016113281
V
-1,0
BOT
0,0.0397833333333333
V
0,-0.0486373901367188
V
-1,0
BOT
0,0.04645
V
0,-0.0472068786621094
V
-1,0
BOT
0,0.0531166666666667
V
0,-0.0467300415039063
V
-1,0
BOT
0,0.0597833333333333
V
0,-0.0462532043457031
V
-1,0
BOT
0,0.06645
V
0,-0.0462532043457031
V
-1,0
BOT
0,0.0731166666666667
V
0,-0.0472068786621094
V
-1,0
BOT
0,0.0797833333333333
V
0,-0.0486373901367188
V
-1,0
BOT
0,0.08645
V
0,-0.0500679016113281
V
-1,0
BOT
0,0.0931166666666667
V
0,-0.0519752502441406
V
-1,0
BOT
0,0.0997833333333333
V
0,-0.0543594360351563
V
-1,0
BOT
0,0.10645
V
0,-0.0562667846679688
V
-1,0
BOT
0,0.113116666666667
V
0,-0.0586509704589844
V
-1,0
BOT
0,0.119783333333333
V
0,-0.0605583190917969
V
-1,0
BOT
0,0.12645
V
0,-0.0619888305664063
V
-1,0
BOT
0,0.133116666666667
V
0,-0.0624656677246094
V
-1,0
BOT
0,0.139783333333333
V
0,-0.0629425048828125
V
-1,0
BOT
0,0.14645
V
0,-0.0634193420410156
V
-1,0
BOT
0,0.153116666666667
V
0,-0.0643730163574219
V
-1,0
BOT
0,0.159783333333333
V
0,-0.064849853515625
V
-1,0
BOT
0,0.16645
V
0,-0.0658035278320313
V
-1,0
BOT
0,0.173116666666667
V
0,-0.0667572021484375
V
-1,0
BOT
0,0.179783333333333
V
0,-0.0672340393066406
V
-1,0
BOT
0,0.18645
V
0,-0.0681877136230469
V
-1,0
BOT
0,0.193116666666667
V
0,-0.06866455078125
V
-1,0
BOT
0,0.199783333333333
V
0,-0.0696182250976563
V
-1,0
BOT
0,0.20645
V
0,-0.0700950622558594
V
-1,0
BOT
0,0.213116666666667
V
0,-0.0710487365722656
V
-1,0
BOT
0,0.219783333333333
V
0,-0.0715255737304688
V
-1,0
BOT
0,0.22645
V
0,-0.072479248046875
V
-1,0
BOT
0,0.233116666666667
V
0,-0.0729560852050781
V
-1,0
BOT
0,0.239783333333333
V
0,-0.0729560852050781
V
-1,0
BOT
0,0.24645
V
0,-0.0734329223632813
V
-1,0
BOT
0,0.253116666666667
V
0,-0.0739097595214844
V
-1,0
BOT
0,0.259783333333333
V
0,-0.0739097595214844
V
-1,0
BOT
0,0.26645
V
0,-0.0743865966796875
V
-1,0
BOT
0,0.273116666666667
V
0,-0.0748634338378906
V
-1,0
BOT
0,0.279783333333333
V
0,-0.0762939453125
V
-1,0
BOT
0,0.28645
V
0,-0.0767707824707031
V
-1,0
BOT
0,0.293116666666667
V
0,-0.0772476196289063
V
-1,0
BOT
0,0.299783333333333
V
0,-0.0777244567871094
V
-1,0
BOT
0,0.30645
V
0,-0.0786781311035156
V
-1,0
BOT
0,0.313116666666667
V
0,-0.0786781311035156
V
-1,0
BOT
0,0.319783333333333
V
0,-0.0777244567871094
V
-1,0
BOT
0,0.32645
V
0,-0.0777244567871094
V
-1,0
BOT
0,0.333116666666667
V
0,-0.0777244567871094
V
-1,0
BOT
0,0.339783333333333
V
0,-0.0777244567871094
V
-1,0
BOT
0,0.34645
V
0,-0.0777244567871094
V
-1,0
BOT
0,0.353116666666667
V
0,-0.0782012939453125
V
-1,0
BOT
0,0.359783333333333
V
0,-0.0786781311035156
V
-1,0
BOT
0,0.36645
V
0,-0.0786781311035156
V
-1,0
BOT
0,0.373116666666667
V
0,-0.0786781311035156
V
-1,0
BOT
0,0.379783333333333
V
0,-0.0782012939453125
V
-1,0
BOT
0,0.38645
V
0,-0.0777244567871094
V
-1,0
BOT
0,0.393116666666667
V
0,-0.0767707824707031
V
-1,0
BOT
0,0.399783333333333
V
0,-0.0762939453125
V
-1,0
BOT
0,0.40645
V
0,-0.0753402709960938
V
-1,0
BOT
0,0.413116666666667
V
0,-0.0753402709960938
V
-1,0
BOT
0,0.419783333333333
V
0,-0.0748634338378906
V
-1,0
BOT
0,0.42645
V
0,-0.0748634338378906
V
-1,0
BOT
0,0.433116666666667
V
0,-0.0743865966796875
V
-1,0
BOT
0,0.439783333333333
V
0,-0.0743865966796875
V
-1,0
BOT
0,0.44645
V
0,-0.0743865966796875
V
-1,0
BOT
0,0.453116666666667
V
0,-0.0743865966796875
V
-1,0
BOT
0,0.459783333333333
V
0,-0.0743865966796875
V
-1,0
BOT
0,0.46645
V
0,-0.0748634338378906
V
-1,0
BOT
0,0.473116666666667
V
0,-0.0753402709960938
V
-1,0
BOT
0,0.479783333333333
V
0,-0.0758171081542969
V
-1,0
BOT
0,0.48645
V
0,-0.0762939453125
V
-1,0
BOT
0,0.493116666666667
V
0,-0.0772476196289063
V
-1,0
BOT
0,0.499783333333333
V
0,-0.0777244567871094
V
-1,0
BOT
0,0.50645
V
0,-0.0782012939453125
V
-1,0
BOT
0,0.513116666666667
V
0,-0.0782012939453125
V
-1,0
BOT
0,0.519783333333333
V
0,-0.0786781311035156
V
-1,0
BOT
0,0.52645
V
0,-0.0786781311035156
V
-1,0
BOT
0,0.533116666666667
V
0,-0.0786781311035156
V
-1,0
BOT
0,0.539783333333333
V
0,-0.0791549682617188
V
-1,0
BOT
0,0.54645
V
0,-0.0796318054199219
V
-1,0
BOT
0,0.553116666666667
V
0,-0.080108642578125
V
-1,0
BOT
0,0.559783333333333
V
0,-0.0805854797363281
V
-1,0
BOT
0,0.56645
V
0,-0.0815391540527344
V
-1,0
BOT
0,0.573116666666667
V
0,-0.0815391540527344
V
-1,0
BOT
0,0.579783333333333
V
0,-0.0815391540527344
V
-1,0
BOT
0,0.58645
V
0,-0.0815391540527344
V
-1,0
BOT
0,0.593116666666667
V
0,-0.0815391540527344
V
-1,0
BOT
0,0.599783333333333
V
0,-0.0820159912109375
V
-1,0
BOT
0,0.60645
V
0,-0.0824928283691406
V
-1,0
BOT
0,0.613116666666667
V
0,-0.0829696655273438
V
-1,0
BOT
0,0.619783333333333
V
0,-0.08392333984375
V
-1,0
BOT
0,0.62645
V
0,-0.0853538513183594
V
-1,0
BOT
0,0.633116666666667
V
0,-0.0863075256347656
V
-1,0
BOT
0,0.639783333333333
V
0,-0.0867843627929688
V
-1,0
BOT
0,0.64645
V
0,-0.0872611999511719
V
-1,0
BOT
0,0.653116666666667
V
0,-0.0872611999511719
V
-1,0
BOT
0,0.659783333333333
V
0,-0.087738037109375
V
-1,0
BOT
0,0.66645
V
0,-0.087738037109375
V
-1,0
BOT
0,0.673116666666667
V
0,-0.0872611999511719
V
-1,0
BOT
0,0.679783333333333
V
0,-0.0872611999511719
V
-1,0
BOT
0,0.68645
V
0,-0.087738037109375
V
-1,0
BOT
0,0.693116666666667
V
0,-0.0886917114257813
V
-1,0
BOT
0,0.699783333333333
V
0,-0.0891685485839844
V
-1,0
BOT
0,0.70645
V
0,-0.0896453857421875
V
-1,0
BOT
0,0.713116666666667
V
0,-0.0910758972167969
V
-1,0
BOT
0,0.719783333333333
V
0,-0.0920295715332031
V
-1,0
BOT
0,0.72645
V
0,-0.0929832458496094
V
-1,0
BOT
0,0.733116666666667
V
0,-0.0934600830078125
V
-1,0
BOT
0,0.739783333333333
V
0,-0.0939369201660156
V
-1,0
BOT
0,0.74645
V
0,-0.0944137573242188
V
-1,0
BOT
0,0.753116666666667
V
0,-0.0944137573242188
V
-1,0
BOT
0,0.759783333333333
V
0,-0.0944137573242188
V
-1,0
BOT
0,0.76645
V
0,-0.0939369201660156
V
-1,0
BOT
0,0.773116666666667
V
0,-0.0939369201660156
V
-1,0
BOT
0,0.779783333333333
V
0,-0.0944137573242188
V
-1,0
BOT
0,0.78645
V
0,-0.0944137573242188
V
-1,0
BOT
0,0.793116666666667
V
0,-0.0948905944824219
V
-1,0
BOT
0,0.799783333333333
V
0,-0.0958442687988281
V
-1,0
BOT
0,0.80645
V
0,-0.0963211059570313
V
-1,0
BOT
0,0.813116666666667
V
0,-0.0963211059570313
V
-1,0
BOT
0,0.819783333333333
V
0,-0.0967979431152344
V
-1,0
BOT
0,0.82645
V
0,-0.0967979431152344
V
-1,0
BOT
0,0.833116666666667
V
0,-0.0972747802734375
V
-1,0
BOT
0,0.839783333333333
V
0,-0.0972747802734375
V
-1,0
BOT
0,0.84645
V
0,-0.0977516174316406
V
-1,0
BOT
0,0.853116666666667
V
0,-0.0982284545898438
V
-1,0
BOT
0,0.859783333333333
V
0,-0.0982284545898438
V
-1,0
BOT
0,0.86645
V
0,-0.0982284545898438
V
-1,0
BOT
0,0.873116666666667
V
0,-0.0977516174316406
V
-1,0
BOT
0,0.879783333333333
V
0,-0.0982284545898438
V
-1,0
BOT
0,0.88645
V
0,-0.0987052917480469
V
-1,0
BOT
0,0.893116666666667
V
0,-0.0996589660644531
V
-1,0
BOT
0,0.899783333333333
V
0,-0.100135803222656
V
-1,0
BOT
0,0.90645
V
0,-0.101089477539062
V
-1,0
BOT
0,0.913116666666667
V
0,-0.102043151855469
V
-1,0
BOT
0,0.919783333333333
V
0,-0.102996826171875
V
-1,0
BOT
0,0.92645
V
0,-0.103473663330078
V
-1,0
BOT
0,0.933116666666667
V
0,-0.104427337646484
V
-1,0
BOT
0,0.939783333333333
V
0,-0.104904174804687
V
-1,0
BOT
0,0.94645
V
0,-0.105381011962891
V
-1,0
BOT
0,0.953116666666667
V
0,-0.105381011962891
V
-1,0
BOT
0,0.959783333333333
V
0,-0.105381011962891
V
-1,0
BOT
0,0.96645
V
0,-0.105857849121094
V
-1,0
BOT
0,0.973116666666667
V
0,-0.106334686279297
V
-1,0
BOT
0,0.979783333333333
V
0,-0.1068115234375
V
-1,0
BOT
0,0.98645
V
0,-0.1068115234375
V
-1,0
BOT
0,0.993116666666667
V
0,-0.1068115234375
V
-1,0
BOT
0,0.999783333333333
V
0,-0.107288360595703
V
-1,0
BOT
0,1.00645
V
0,-0.1068115234375
V
-1,0
BOT
0,1.01311666666667
V
0,-0.1068115234375
V
-1,0
BOT
0,1.01978333333333
V
0,-0.1068115234375
V
-1,0
BOT
0,1.02645
V
0,-0.107288360595703
V
-1,0
BOT
0,1.03311666666667
V
0,-0.108242034912109
V
-1,0
BOT
0,1.03978333333333
V
0,-0.108718872070312
V
-1,0
BOT
0,1.04645
V
0,-0.109195709228516
V
-1,0
BOT
0,1.05311666666667
V
0,-0.110149383544922
V
-1,0
BOT
0,1.05978333333333
V
0,-0.111103057861328
V
-1,0
BOT
0,1.06645
V
0,-0.111579895019531
V
-1,0
BOT
0,1.07311666666667
V
0,-0.111579895019531
V
-1,0
BOT
0,1.07978333333333
V
0,-0.111103057861328
V
-1,0
BOT
0,1.08645
V
0,-0.110626220703125
V
-1,0
BOT
0,1.09311666666667
V
0,-0.110626220703125
V
-1,0
BOT
0,1.09978333333333
V
0,-0.111103057861328
V
-1,0
BOT
0,1.10645
V
0,-0.111579895019531
V
-1,0
BOT
0,1.11311666666667
V
0,-0.112533569335937
V
-1,0
BOT
0,1.11978333333333
V
0,-0.113010406494141
V
-1,0
BOT
0,1.12645
V
0,-0.113487243652344
V
-1,0
BOT
0,1.13311666666667
V
0,-0.113010406494141
V
-1,0
BOT
0,1.13978333333333
V
0,-0.112533569335937
V
-1,0
BOT
0,1.14645
V
0,-0.112056732177734
V
-1,0
BOT
0,1.15311666666667
V
0,-0.111579895019531
V
-1,0
BOT
0,1.15978333333333
V
0,-0.112056732177734
V
-1,0
BOT
0,1.16645
V
0,-0.113010406494141
V
-1,0
BOT
0,1.17311666666667
V
0,-0.113964080810547
V
-1,0
BOT
0,1.17978333333333
V
0,-0.114917755126953
V
-1,0
BOT
0,1.18645
V
0,-0.115394592285156
V
-1,0
BOT
0,1.19311666666667
V
0,-0.115871429443359
V
-1,0
BOT
0,1.19978333333333
V
0,-0.115871429443359
V
-1,0
BOT
0,1.20645
V
0,-0.115394592285156
V
-1,0
BOT
0,1.21311666666667
V
0,-0.115394592285156
V
-1,0
BOT
0,1.21978333333333
V
0,-0.115871429443359
V
-1,0
BOT
0,1.22645
V
0,-0.116825103759766
V
-1,0
BOT
0,1.23311666666667
V
0,-0.117778778076172
V
-1,0
BOT
0,1.23978333333333
V
0,-0.118732452392578
V
-1,0
BOT
0,1.24645
V
0,-0.119686126708984
V
-1,0
BOT
0,1.25311666666667
V
0,-0.120639801025391
V
-1,0
BOT
0,1.25978333333333
V
0,-0.121593475341797
V
-1,0
BOT
0,1.26645
V
0,-0.1220703125
V
-1,0
BOT
0,1.27311666666667
V
0,-0.122547149658203
V
-1,0
BOT
0,1.27978333333333
V
0,-0.123023986816406
V
-1,0
BOT
0,1.28645
V
0,-0.123500823974609
V
-1,0
BOT
0,1.29311666666667
V
0,-0.123500823974609
V
-1,0
BOT
0,1.29978333333333
V
0,-0.123023986816406
V
-1,0
BOT
0,1.30645
V
0,-0.122547149658203
V
-1,0
BOT
0,1.31311666666667
V
0,-0.1220703125
V
-1,0
BOT
0,1.31978333333333
V
0,-0.1220703125
V
-1,0
BOT
0,1.32645
V
0,-0.122547149658203
V
-1,0
BOT
0,1.33311666666667
V
0,-0.123500823974609
V
-1,0
BOT
0,1.33978333333333
V
0,-0.124454498291016
V
-1,0
BOT
0,1.34645
V
0,-0.125408172607422
V
-1,0
BOT
0,1.35311666666667
V
0,-0.126361846923828
V
-1,0
BOT
0,1.35978333333333
V
0,-0.127315521240234
V
-1,0
BOT
0,1.36645
V
0,-0.127315521240234
V
-1,0
BOT
0,1.37311666666667
V
0,-0.126838684082031
V
-1,0
BOT
0,1.37978333333333
V
0,-0.127315521240234
V
-1,0
BOT
0,1.38645
V
0,-0.127315521240234
V
-1,0
BOT
0,1.39311666666667
V
0,-0.127315521240234
V
-1,0
BOT
0,1.39978333333333
V
0,-0.127315521240234
V
-1,0
BOT
0,1.40645
V
0,-0.127315521240234
V
-1,0
BOT
0,1.41311666666667
V
0,-0.127315521240234
V
-1,0
BOT
0,1.41978333333333
V
0,-0.127315521240234
V
-1,0
BOT
0,1.42645
V
0,-0.127315521240234
V
-1,0
BOT
0,1.43311666666667
V
0,-0.127315521240234
V
-1,0
BOT
0,1.43978333333333
V
0,-0.127315521240234
V
-1,0
BOT
0,1.44645
V
0,-0.127792358398437
V
-1,0
BOT
0,1.45311666666667
V
0,-0.127792358398437
V
-1,0
BOT
0,1.45978333333333
V
0,-0.127792358398437
V
-1,0
BOT
0,1.46645
V
0,-0.128269195556641
V
-1,0
BOT
0,1.47311666666667
V
0,-0.127792358398437
V
-1,0
BOT
0,1.47978333333333
V
0,-0.126838684082031
V
-1,0
BOT
0,1.48645
V
0,-0.125885009765625
V
-1,0
BOT
0,1.49311666666667
V
0,-0.125408172607422
V
-1,0
BOT
0,1.49978333333333
V
0,-0.124931335449219
V
-1,0
BOT
0,1.50645
V
0,-0.124931335449219
V
-1,0
BOT
0,1.51311666666667
V
0,-0.125408172607422
V
-1,0
BOT
0,1.51978333333333
V
0,-0.125885009765625
V
-1,0
BOT
0,1.52645
V
0,-0.126361846923828
V
-1,0
BOT
0,1.53311666666667
V
0,-0.127315521240234
V
-1,0
BOT
0,1.53978333333333
V
0,-0.127315521240234
V
-1,0
BOT
0,1.54645
V
0,-0.127315521240234
V
-1,0
BOT
0,1.55311666666667
V
0,-0.127315521240234
V
-1,0
BOT
0,1.55978333333333
V
0,-0.127315521240234
V
-1,0
BOT
0,1.56645
V
0,-0.127315521240234
V
-1,0
BOT
0,1.57311666666667
V
0,-0.127315521240234
V
-1,0
BOT
0,1.57978333333333
V
0,-0.127315521240234
V
-1,0
BOT
0,1.58645
V
0,-0.127315521240234
V
-1,0
BOT
0,1.59311666666667
V
0,-0.128269195556641
V
-1,0
BOT
0,1.59978333333333
V
0,-0.128746032714844
V
-1,0
BOT
0,1.60645
V
0,-0.12969970703125
V
-1,0
BOT
0,1.61311666666667
V
0,-0.130176544189453
V
-1,0
BOT
0,1.61978333333333
V
0,-0.130176544189453
V
-1,0
BOT
0,1.62645
V
0,-0.12969970703125
V
-1,0
BOT
0,1.63311666666667
V
0,-0.128746032714844
V
-1,0
BOT
0,1.63978333333333
V
0,-0.126838684082031
V
-1,0
BOT
0,1.64645
V
0,-0.125408172607422
V
-1,0
BOT
0,1.65311666666667
V
0,-0.123500823974609
V
-1,0
BOT
0,1.65978333333333
V
0,-0.121593475341797
V
-1,0
BOT
0,1.66645
V
0,-0.120639801025391
V
-1,0
BOT
0,1.67311666666667
V
0,-0.119686126708984
V
-1,0
BOT
0,1.67978333333333
V
0,-0.119209289550781
V
-1,0
BOT
0,1.68645
V
0,-0.119209289550781
V
-1,0
BOT
0,1.69311666666667
V
0,-0.119686126708984
V
-1,0
BOT
0,1.69978333333333
V
0,-0.120639801025391
V
-1,0
BOT
0,1.70645
V
0,-0.1220703125
V
-1,0
BOT
0,1.71311666666667
V
0,-0.123500823974609
V
-1,0
BOT
0,1.71978333333333
V
0,-0.124931335449219
V
-1,0
BOT
0,1.72645
V
0,-0.126361846923828
V
-1,0
BOT
0,1.73311666666667
V
0,-0.127792358398437
V
-1,0
BOT
0,1.73978333333333
V
0,-0.128269195556641
V
-1,0
BOT
0,1.74645
V
0,-0.128746032714844
V
-1,0
BOT
0,1.75311666666667
V
0,-0.128269195556641
V
-1,0
BOT
0,1.75978333333333
V
0,-0.128269195556641
V
-1,0
BOT
0,1.76645
V
0,-0.128746032714844
V
-1,0
BOT
0,1.77311666666667
V
0,-0.129222869873047
V
-1,0
BOT
0,1.77978333333333
V
0,-0.129222869873047
V
-1,0
BOT
0,1.78645
V
0,-0.12969970703125
V
-1,0
BOT
0,1.79311666666667
V
0,-0.130176544189453
V
-1,0
BOT
0,1.79978333333333
V
0,-0.131130218505859
V
-1,0
BOT
0,1.80645
V
0,-0.131607055664062
V
-1,0
BOT
0,1.81311666666667
V
0,-0.132083892822266
V
-1,0
BOT
0,1.81978333333333
V
0,-0.133037567138672
V
-1,0
BOT
0,1.82645
V
0,-0.133991241455078
V
-1,0
BOT
0,1.83311666666667
V
0,-0.134944915771484
V
-1,0
BOT
0,1.83978333333333
V
0,-0.134468078613281
V
-1,0
BOT
0,1.84645
V
0,-0.133991241455078
V
-1,0
BOT
0,1.85311666666667
V
0,-0.133514404296875
V
-1,0
BOT
0,1.85978333333333
V
0,-0.132560729980469
V
-1,0
BOT
0,1.86645
V
0,-0.131607055664062
V
-1,0
BOT
0,1.87311666666667
V
0,-0.130653381347656
V
-1,0
BOT
0,1.87978333333333
V
0,-0.12969970703125
V
-1,0
BOT
0,1.88645
V
0,-0.128746032714844
V
-1,0
BOT
0,1.89311666666667
V
0,-0.127792358398437
V
-1,0
BOT
0,1.89978333333333
V
0,-0.126838684082031
V
-1,0
BOT
0,1.90645
V
0,-0.124454498291016
V
-1,0
BOT
0,1.91311666666667
V
0,-0.121593475341797
V
-1,0
BOT
0,1.91978333333333
V
0,-0.118255615234375
V
-1,0
BOT
0,1.92645
V
0,-0.11444091796875
V
-1,0
BOT
0,1.93311666666667
V
0,-0.110149383544922
V
-1,0
BOT
0,1.93978333333333
V
0,-0.105381011962891
V
-1,0
BOT
0,1.94645
V
0,-0.101089477539062
V
-1,0
BOT
0,1.95311666666667
V
0,-0.0967979431152344
V
-1,0
BOT
0,1.95978333333333
V
0,-0.0925064086914063
V
-1,0
BOT
0,1.96645
V
0,-0.087738037109375
V
-1,0
BOT
0,1.97311666666667
V
0,-0.0824928283691406
V
-1,0
BOT
0,1.97978333333333
V
0,-0.0753402709960938
V
-1,0
BOT
0,1.98645
V
0,-0.064849853515625
V
-1,0
BOT
0,1.99311666666667
V
0,-0.0472068786621094
V
-1,0
BOT
0,1.99978333333333
V
0,-0.0171661376953125
V
-1,0
BOT
0,2.00645
V
0,0.0329017639160156
V
-1,0
BOT
0,2.01311666666667
V
0,0.113487243652344
V
-1,0
BOT
0,2.01978333333333
V
0,0.23651123046875
V
-1,0
BOT
0,2.02645
V
0,0.414371490478516
V
-1,0
BOT
0,2.03311666666667
V
0,0.662326812744141
V
-1,0
BOT
0,2.03978333333333
V
0,0.990867614746094
V
-1,0
BOT
0,2.04645
V
0,1.39856338500977
V
-1,0
BOT
0,2.05311666666667
V
0,1.86443328857422
V
-1,0
BOT
0,2.05978333333333
V
0,2.35128402709961
V
-1,0
BOT
0,2.06645
V
0,2.81476974487305
V
-1,0
BOT
0,2.07311666666667
V
0,3.21102142333984
V
-1,0
BOT
0,2.07978333333333
V
0,3.50713729858398
V
-1,0
BOT
0,2.08645
V
0,3.68547439575195
V
-1,0
BOT
0,2.09311666666667
V
0,3.74650955200195
V
-1,0
BOT
0,2.09978333333333
V
0,3.70216369628906
V
-1,0
BOT
0,2.10645
V
0,3.56531143188477
V
-1,0
BOT
0,2.11311666666667
V
0,3.34787368774414
V
-1,0
BOT
0,2.11978333333333
V
0,3.06415557861328
V
-1,0
BOT
0,2.12645
V
0,2.73656845092773
V
-1,0
BOT
0,2.13311666666667
V
0,2.39181518554687
V
-1,0
BOT
0,2.13978333333333
V
0,2.0599365234375
V
-1,0
BOT
0,2.14645
V
0,1.7704963684082
V
-1,0
BOT
0,2.15311666666667
V
0,1.54685974121094
V
-1,0
BOT
0,2.15978333333333
V
0,1.39617919921875
V
-1,0
BOT
0,2.16645
V
0,1.30987167358398
V
-1,0
BOT
0,2.17311666666667
V
0,1.27172470092773
V
-1,0
BOT
0,2.17978333333333
V
0,1.26552581787109
V
-1,0
BOT
0,2.18645
V
0,1.27983093261719
V
-1,0
BOT
0,2.19311666666667
V
0,1.30748748779297
V
-1,0
BOT
0,2.19978333333333
V
0,1.34563446044922
V
-1,0
BOT
0,2.20645
V
0,1.39665603637695
V
-1,0
BOT
0,2.21311666666667
V
0,1.46389007568359
V
-1,0
BOT
0,2.21978333333333
V
0,1.55353546142578
V
-1,0
BOT
0,2.22645
V
0,1.67226791381836
V
-1,0
BOT
0,2.23311666666667
V
0,1.82771682739258
V
-1,0
BOT
0,2.23978333333333
V
0,2.02798843383789
V
-1,0
BOT
0,2.24645
V
0,2.27546691894531
V
-1,0
BOT
0,2.25311666666667
V
0,2.56633758544922
V
-1,0
BOT
0,2.25978333333333
V
0,2.89011001586914
V
-1,0
BOT
0,2.26645
V
0,3.23152542114258
V
-1,0
BOT
0,2.27311666666667
V
0,3.57294082641602
V
-1,0
BOT
0,2.27978333333333
V
0,3.90148162841797
V
-1,0
BOT
0,2.28645
V
0,4.20951843261719
V
-1,0
BOT
0,2.29311666666667
V
0,4.49752807617188
V
-1,0
BOT
0,2.29978333333333
V
0,4.76694107055664
V
-1,0
BOT
0,2.30645
V
0,5.01489639282227
V
-1,0
BOT
0,2.31311666666667
V
0,5.22756576538086
V
-1,0
BOT
0,2.31978333333333
V
0,5.37872314453125
V
-1,0
BOT
0,2.32645
V
0,5.43880462646484
V
-1,0
BOT
0,2.33311666666667
V
0,5.38730621337891
V
-1,0
BOT
0,2.33978333333333
V
0,5.22422790527344
V
-1,0
BOT
0,2.34645
V
0,4.97293472290039
V
-1,0
BOT
0,2.35311666666667
V
0,4.67491149902344
V
-1,0
BOT
0,2.35978333333333
V
0,4.37784194946289
V
-1,0
BOT
0,2.36645
V
0,4.12225723266602
V
-1,0
BOT
0,2.37311666666667
V
0,3.93390655517578
V
-1,0
BOT
0,2.37978333333333
V
0,3.82232666015625
V
-1,0
BOT
0,2.38645
V
0,3.78656387329102
V
-1,0
BOT
0,2.39311666666667
V
0,3.82423400878906
V
-1,0
BOT
0,2.39978333333333
V
0,3.93915176391602
V
-1,0
BOT
0,2.40645
V
0,4.14276123046875
V
-1,0
BOT
0,2.41311666666667
V
0,4.44984436035156
V
-1,0
BOT
0,2.41978333333333
V
0,4.87089157104492
V
-1,0
BOT
0,2.42645
V
0,5.40637969970703
V
-1,0
BOT
0,2.43311666666667
V
0,6.04772567749023
V
-1,0
BOT
0,2.43978333333333
V
0,6.77776336669922
V
-1,0
BOT
0,2.44645
V
0,7.57169723510742
V
-1,0
BOT
0,2.45311666666667
V
0,8.40091705322266
V
-1,0
BOT
0,2.45978333333333
V
0,9.2315673828125
V
-1,0
BOT
0,2.46645
V
0,10.0250244140625
V
-1,0
BOT
0,2.47311666666667
V
0,10.7383728027344
V
-1,0
BOT
0,2.47978333333333
V
0,11.326789855957
V
-1,0
BOT
0,2.48645
V
0,11.7521286010742
V
-1,0
BOT
0,2.49311666666667
V
0,11.9891166687012
V
-1,0
BOT
0,2.49978333333333
V
0,12.0358467102051
V
-1,0
BOT
0,2.50645
V
0,11.9204521179199
V
-1,0
BOT
0,2.51311666666667
V
0,11.7030143737793
V
-1,0
BOT
0,2.51978333333333
V
0,11.4688873291016
V
-1,0
BOT
0,2.52645
V
0,11.3143920898437
V
-1,0
BOT
0,2.53311666666667
V
0,11.3224983215332
V
-1,0
BOT
0,2.53978333333333
V
0,11.5418434143066
V
-1,0
BOT
0,2.54645
V
0,11.9690895080566
V
-1,0
BOT
0,2.55311666666667
V
0,12.5479698181152
V
-1,0
BOT
0,2.55978333333333
V
0,13.1821632385254
V
-1,0
BOT
0,2.56645
V
0,13.7577056884766
V
-1,0
BOT
0,2.57311666666667
V
0,14.1682624816895
V
-1,0
BOT
0,2.57978333333333
V
0,14.3370628356934
V
-1,0
BOT
0,2.58645
V
0,14.2302513122559
V
-1,0
BOT
0,2.59311666666667
V
0,13.859748840332
V
-1,0
BOT
0,2.59978333333333
V
0,13.2780075073242
V
-1,0
BOT
0,2.60645
V
0,12.5632286071777
V
-1,0
BOT
0,2.61311666666667
V
0,11.8064880371094
V
-1,0
BOT
0,2.61978333333333
V
0,11.1031532287598
V
-1,0
BOT
0,2.62645
V
0,10.5433464050293
V
-1,0
BOT
0,2.63311666666667
V
0,10.2076530456543
V
-1,0
BOT
0,2.63978333333333
V
0,10.1566314697266
V
-1,0
BOT
0,2.64645
V
0,10.4179382324219
V
-1,0
BOT
0,2.65311666666667
V
0,10.9753608703613
V
-1,0
BOT
0,2.65978333333333
V
0,11.7497444152832
V
-1,0
BOT
0,2.66645
V
0,12.6047134399414
V
-1,0
BOT
0,2.67311666666667
V
0,13.36669921875
V
-1,0
BOT
0,2.67978333333333
V
0,13.8683319091797
V
-1,0
BOT
0,2.68645
V
0,13.9951705932617
V
-1,0
BOT
0,2.69311666666667
V
0,13.7186050415039
V
-1,0
BOT
0,2.69978333333333
V
0,13.1053924560547
V
-1,0
BOT
0,2.70645
V
0,12.3023986816406
V
-1,0
BOT
0,2.71311666666667
V
0,11.4932060241699
V
-1,0
BOT
0,2.71978333333333
V
0,10.8466148376465
V
-1,0
BOT
0,2.72645
V
0,10.4727745056152
V
-1,0
BOT
0,2.73311666666667
V
0,10.4045867919922
V
-1,0
BOT
0,2.73978333333333
V
0,10.6039047241211
V
-1,0
BOT
0,2.74645
V
0,10.9930038452148
V
-1,0
BOT
0,2.75311666666667
V
0,11.4874839782715
V
-1,0
BOT
0,2.75978333333333
V
0,12.0363235473633
V
-1,0
BOT
0,2.76645
V
0,12.6500129699707
V
-1,0
BOT
0,2.77311666666667
V
0,13.4334564208984
V
-1,0
BOT
0,2.77978333333333
V
0,14.6431922912598
V
-1,0
BOT
0,2.78645
V
0,16.8743133544922
V
-1,0
BOT
0,2.79311666666667
V
0,23.9853858947754
V
-1,0
BOT
0,2.79978333333333
V
0,61.7408752441406
V
-1,0
BOT
0,2.80645
V
0,176.424503326416
V
-1,0
BOT
0,2.81311666666667
V
0,370.396137237549
V
-1,0
BOT
0,2.81978333333333
V
0,584.681987762451
V
-1,0
BOT
0,2.82645
V
0,744.407653808594
V
-1,0
BOT
0,2.83311666666667
V
0,826.109409332275
V
-1,0
BOT
0,2.83978333333333
V
0,831.177234649658
V
-1,0
BOT
0,2.84645
V
0,738.1591796875
V
-1,0
BOT
0,2.85311666666667
V
0,556.484699249268
V
-1,0
BOT
0,2.85978333333333
V
0,349.642276763916
V
-1,0
BOT
0,2.86645
V
0,193.865299224854
V
-1,0
BOT
0,2.87311666666667
V
0,109.655857086182
V
-1,0
BOT
0,2.87978333333333
V
0,70.3139305114746
V
-1,0
BOT
0,2.88645
V
0,51.2285232543945
V
-1,0
BOT
0,2.89311666666667
V
0,40.6651496887207
V
-1,0
BOT
0,2.89978333333333
V
0,33.9798927307129
V
-1,0
BOT
0,2.90645
V
0,29.3216705322266
V
-1,0
BOT
0,2.91311666666667
V
0,25.8708000183105
V
-1,0
BOT
0,2.91978333333333
V
0,23.2100486755371
V
-1,0
BOT
0,2.92645
V
0,21.0976600646973
V
-1,0
BOT
0,2.93311666666667
V
0,19.3758010864258
V
-1,0
BOT
0,2.93978333333333
V
0,17.9362297058105
V
-1,0
BOT
0,2.94645
V
0,16.7016983032227
V
-1,0
BOT
0,2.95311666666667
V
0,15.6164169311523
V
-1,0
BOT
0,2.95978333333333
V
0,14.6431922912598
V
-1,0
BOT
0,2.96645
V
0,13.7591361999512
V
-1,0
BOT
0,2.97311666666667
V
0,12.9499435424805
V
-1,0
BOT
0,2.97978333333333
V
0,12.2065544128418
V
-1,0
BOT
0,2.98645
V
0,11.5237236022949
V
-1,0
BOT
0,2.99311666666667
V
0,10.897159576416
V
-1,0
BOT
0,2.99978333333333
V
0,10.3254318237305
V
-1,0
BOT
0,3.00645
V
0,9.80472564697266
V
-1,0
BOT
0,3.01311666666667
V
0,9.33122634887695
V
-1,0
BOT
0,3.01978333333333
V
0,8.90016555786133
V
-1,0
BOT
0,3.02645
V
0,8.50915908813477
V
-1,0
BOT
0,3.03311666666667
V
0,8.15391540527344
V
-1,0
BOT
0,3.03978333333333
V
0,7.83157348632813
V
-1,0
BOT
0,3.04645
V
0,7.53879547119141
V
-1,0
BOT
0,3.05311666666667
V
0,7.27319717407227
V
-1,0
BOT
0,3.05978333333333
V
0,7.03191757202148
V
-1,0
BOT
0,3.06645
V
0,6.81447982788086
V
-1,0
BOT
0,3.07311666666667
V
0,6.61802291870117
V
-1,0
BOT
0,3.07978333333333
V
0,6.44159317016602
V
-1,0
BOT
0,3.08645
V
0,6.28328323364258
V
-1,0
BOT
0,3.09311666666667
V
0,6.14213943481445
V
-1,0
BOT
0,3.09978333333333
V
0,6.01625442504883
V
-1,0
BOT
0,3.10645
V
0,5.9051513671875
V
-1,0
BOT
0,3.11311666666667
V
0,5.80739974975586
V
-1,0
BOT
0,3.11978333333333
V
0,5.7220458984375
V
-1,0
BOT
0,3.12645
V
0,5.64861297607422
V
-1,0
BOT
0,3.13311666666667
V
0,5.58662414550781
V
-1,0
BOT
0,3.13978333333333
V
0,5.53464889526367
V
-1,0
BOT
0,3.14645
V
0,5.49221038818359
V
-1,0
BOT
0,3.15311666666667
V
0,5.46026229858398
V
-1,0
BOT
0,3.15978333333333
V
0,5.43689727783203
V
-1,0
BOT
0,3.16645
V
0,5.42163848876953
V
-1,0
BOT
0,3.17311666666667
V
0,5.41448593139648
V
-1,0
BOT
0,3.17978333333333
V
0,5.41543960571289
V
-1,0
BOT
0,3.18645
V
0,5.42354583740234
V
-1,0
BOT
0,3.19311666666667
V
0,5.43832778930664
V
-1,0
BOT
0,3.19978333333333
V
0,5.45835494995117
V
-1,0
BOT
0,3.20645
V
0,5.48219680786133
V
-1,0
BOT
0,3.21311666666667
V
0,5.5088996887207
V
-1,0
BOT
0,3.21978333333333
V
0,5.53703308105469
V
-1,0
BOT
0,3.22645
V
0,5.56421279907227
V
-1,0
BOT
0,3.23311666666667
V
0,5.59043884277344
V
-1,0
BOT
0,3.23978333333333
V
0,5.615234375
V
-1,0
BOT
0,3.24645
V
0,5.64146041870117
V
-1,0
BOT
0,3.25311666666667
V
0,5.67150115966797
V
-1,0
BOT
0,3.25978333333333
V
0,5.706787109375
V
-1,0
BOT
0,3.26645
V
0,5.75113296508789
V
-1,0
BOT
0,3.27311666666667
V
0,5.80406188964844
V
-1,0
BOT
0,3.27978333333333
V
0,5.86605072021484
V
-1,0
BOT
0,3.28645
V
0,5.93471527099609
V
-1,0
BOT
0,3.29311666666667
V
0,6.00624084472656
V
-1,0
BOT
0,3.29978333333333
V
0,6.07681274414063
V
-1,0
BOT
0,3.30645
V
0,6.14404678344727
V
-1,0
BOT
0,3.31311666666667
V
0,6.20603561401367
V
-1,0
BOT
0,3.31978333333333
V
0,6.26087188720703
V
-1,0
BOT
0,3.32645
V
0,6.30903244018555
V
-1,0
BOT
0,3.33311666666667
V
0,6.35051727294922
V
-1,0
BOT
0,3.33978333333333
V
0,6.38628005981445
V
-1,0
BOT
0,3.34645
V
0,6.41822814941406
V
-1,0
BOT
0,3.35311666666667
V
0,6.44636154174805
V
-1,0
BOT
0,3.35978333333333
V
0,6.47163391113281
V
-1,0
BOT
0,3.36645
V
0,6.49547576904297
V
-1,0
BOT
0,3.37311666666667
V
0,6.51836395263672
V
-1,0
BOT
0,3.37978333333333
V
0,6.54077529907227
V
-1,0
BOT
0,3.38645
V
0,6.56318664550781
V
-1,0
BOT
0,3.39311666666667
V
0,6.58607482910156
V
-1,0
BOT
0,3.39978333333333
V
0,6.60943984985352
V
-1,0
BOT
0,3.40645
V
0,6.63280487060547
V
-1,0
BOT
0,3.41311666666667
V
0,6.65569305419922
V
-1,0
BOT
0,3.41978333333333
V
0,6.67619705200195
V
-1,0
BOT
0,3.42645
V
0,6.69145584106445
V
-1,0
BOT
0,3.43311666666667
V
0,6.6990852355957
V
-1,0
BOT
0,3.43978333333333
V
0,6.69479370117188
V
-1,0
BOT
0,3.44645
V
0,6.67619705200195
V
-1,0
BOT
0,3.45311666666667
V
0,6.64091110229492
V
-1,0
BOT
0,3.45978333333333
V
0,6.58798217773438
V
-1,0
BOT
0,3.46645
V
0,6.51884078979492
V
-1,0
BOT
0,3.47311666666667
V
0,6.43396377563477
V
-1,0
BOT
0,3.47978333333333
V
0,6.33716583251953
V
-1,0
BOT
0,3.48645
V
0,6.23083114624023
V
-1,0
BOT
0,3.49311666666667
V
0,6.1182975769043
V
-1,0
BOT
0,3.49978333333333
V
0,6.00242614746094
V
-1,0
BOT
0,3.50645
V
0,5.88655471801758
V
-1,0
BOT
0,3.51311666666667
V
0,5.77354431152344
V
-1,0
BOT
0,3.51978333333333
V
0,5.66673278808594
V
-1,0
BOT
0,3.52645
V
0,5.56850433349609
V
-1,0
BOT
0,3.53311666666667
V
0,5.48124313354492
V
-1,0
BOT
0,3.53978333333333
V
0,5.40733337402344
V
-1,0
BOT
0,3.54645
V
0,5.34868240356445
V
-1,0
BOT
0,3.55311666666667
V
0,5.30481338500977
V
-1,0
BOT
0,3.55978333333333
V
0,5.27572631835938
V
-1,0
BOT
0,3.56645
V
0,5.25951385498047
V
-1,0
BOT
0,3.57311666666667
V
0,5.25474548339844
V
-1,0
BOT
0,3.57978333333333
V
0,5.25903701782227
V
-1,0
BOT
0,3.58645
V
0,5.27238845825195
V
-1,0
BOT
0,3.59311666666667
V
0,5.29623031616211
V
-1,0
BOT
0,3.59978333333333
V
0,5.33533096313477
V
-1,0
BOT
0,3.60645
V
0,5.39636611938477
V
-1,0
BOT
0,3.61311666666667
V
0,5.49173355102539
V
-1,0
BOT
0,3.61978333333333
V
0,5.64098358154297
V
-1,0
BOT
0,3.62645
V
0,5.86986541748047
V
-1,0
BOT
0,3.63311666666667
V
0,6.21604919433594
V
-1,0
BOT
0,3.63978333333333
V
0,6.73246383666992
V
-1,0
BOT
0,3.64645
V
0,7.48538970947266
V
-1,0
BOT
0,3.65311666666667
V
0,8.55159759521484
V
-1,0
BOT
0,3.65978333333333
V
0,9.99784469604492
V
-1,0
BOT
0,3.66645
V
0,11.8789672851562
V
-1,0
BOT
0,3.67311666666667
V
0,14.4720077514648
V
-1,0
BOT
0,3.67978333333333
V
0,19.9456214904785
V
-1,0
BOT
0,3.68645
V
0,35.5138778686523
V
-1,0
BOT
0,3.69311666666667
V
0,68.474292755127
V
-1,0
BOT
0,3.69978333333333
V
0,113.470077514648
V
-1,0
BOT
0,3.70645
V
0,154.343605041504
V
-1,0
BOT
0,3.71311666666667
V
0,177.974700927734
V
-1,0
BOT
0,3.71978333333333
V
0,183.459758758545
V
-1,0
BOT
0,3.72645
V
0,171.701908111572
V
-1,0
BOT
0,3.73311666666667
V
0,140.134811401367
V
-1,0
BOT
0,3.73978333333333
V
0,95.5009460449219
V
-1,0
BOT
0,3.74645
V
0,54.2154312133789
V
-1,0
BOT
0,3.75311666666667
V
0,29.1705131530762
V
-1,0
BOT
0,3.75978333333333
V
0,19.0830230712891
V
-1,0
BOT
0,3.76645
V
0,15.7852172851562
V
-1,0
BOT
0,3.77311666666667
V
0,14.4710540771484
V
-1,0
BOT
0,3.77978333333333
V
0,13.6771202087402
V
-1,0
BOT
0,3.78645
V
0,13.0696296691895
V
-1,0
BOT
0,3.79311666666667
V
0,12.5651359558105
V
-1,0
BOT
0,3.79978333333333
V
0,12.1273994445801
V
-1,0
BOT
0,3.80645
V
0,11.7368698120117
V
-1,0
BOT
0,3.81311666666667
V
0,11.3825798034668
V
-1,0
BOT
0,3.81978333333333
V
0,11.0573768615723
V
-1,0
BOT
0,3.82645
V
0,10.7574462890625
V
-1,0
BOT
0,3.83311666666667
V
0,10.4789733886719
V
-1,0
BOT
0,3.83978333333333
V
0,10.2195739746094
V
-1,0
BOT
0,3.84645
V
0,9.979248046875
V
-1,0
BOT
0,3.85311666666667
V
0,9.76037979125977
V
-1,0
BOT
0,3.85978333333333
V
0,9.56869125366211
V
-1,0
BOT
0,3.86645
V
0,9.41228866577148
V
-1,0
BOT
0,3.87311666666667
V
0,9.30356979370117
V
-1,0
BOT
0,3.87978333333333
V
0,9.26017761230469
V
-1,0
BOT
0,3.88645
V
0,9.30643081665039
V
-1,0
BOT
0,3.89311666666667
V
0,9.47809219360352
V
-1,0
BOT
0,3.89978333333333
V
0,9.83238220214844
V
-1,0
BOT
0,3.90645
V
0,10.467529296875
V
-1,0
BOT
0,3.91311666666667
V
0,11.5566253662109
V
-1,0
BOT
0,3.91978333333333
V
0,13.3934020996094
V
-1,0
BOT
0,3.92645
V
0,16.4017677307129
V
-1,0
BOT
0,3.93311666666667
V
0,21.082878112793
V
-1,0
BOT
0,3.93978333333333
V
0,28.0084609985352
V
-1,0
BOT
0,3.94645
V
0,37.8546714782715
V
-1,0
BOT
0,3.95311666666667
V
0,51.1951446533203
V
-1,0
BOT
0,3.95978333333333
V
0,67.6131248474121
V
-1,0
BOT
0,3.96645
V
0,84.6905708312988
V
-1,0
BOT
0,3.97311666666667
V
0,98.6733436584473
V
-1,0
BOT
0,3.97978333333333
V
0,106.529235839844
V
-1,0
BOT
0,3.98645
V
0,107.2998046875
V
-1,0
BOT
0,3.99311666666667
V
0,101.614952087402
V
-1,0
BOT
0,3.99978333333333
V
0,91.0072326660156
V
-1,0
BOT
0,4.00645
V
0,78.2847404479981
V
-1,0
BOT
0,4.01311666666667
V
0,67.0466423034668
V
-1,0
BOT
0,4.01978333333333
V
0,59.8416328430176
V
-1,0
BOT
0,4.02645
V
0,56.8771362304688
V
-1,0
BOT
0,4.03311666666667
V
0,56.7235946655273
V
-1,0
BOT
0,4.03978333333333
V
0,57.8746795654297
V
-1,0
BOT
0,4.04645
V
0,59.3924522399902
V
-1,0
BOT
0,4.05311666666667
V
0,60.7867240905762
V
-1,0
BOT
0,4.05978333333333
V
0,61.8085861206055
V
-1,0
BOT
0,4.06645
V
0,62.340259552002
V
-1,0
BOT
0,4.07311666666667
V
0,62.340259552002
V
-1,0
BOT
0,4.07978333333333
V
0,61.8119239807129
V
-1,0
BOT
0,4.08645
V
0,60.7786178588867
V
-1,0
BOT
0,4.09311666666667
V
0,59.2656135559082
V
-1,0
BOT
0,4.09978333333333
V
0,57.2938919067383
V
-1,0
BOT
0,4.10645
V
0,54.8839569091797
V
-1,0
BOT
0,4.11311666666667
V
0,52.0620346069336
V
-1,0
BOT
0,4.11978333333333
V
0,48.8743782043457
V
-1,0
BOT
0,4.12645
V
0,45.3948974609375
V
-1,0
BOT
0,4.13311666666667
V
0,41.7275428771973
V
-1,0
BOT
0,4.13978333333333
V
0,37.9986763000488
V
-1,0
BOT
0,4.14645
V
0,34.3432426452637
V
-1,0
BOT
0,4.15311666666667
V
0,30.8899879455566
V
-1,0
BOT
0,4.15978333333333
V
0,27.745246887207
V
-1,0
BOT
0,4.16645
V
0,24.9819755554199
V
-1,0
BOT
0,4.17311666666667
V
0,22.6373672485352
V
-1,0
BOT
0,4.17978333333333
V
0,20.7138061523437
V
-1,0
BOT
0,4.18645
V
0,19.1855430603027
V
-1,0
BOT
0,4.19311666666667
V
0,18.0106163024902
V
-1,0
BOT
0,4.19978333333333
V
0,17.1360969543457
V
-1,0
BOT
0,4.20645
V
0,16.510009765625
V
-1,0
BOT
0,4.21311666666667
V
0,16.0832405090332
V
-1,0
BOT
0,4.21978333333333
V
0,15.8114433288574
V
-1,0
BOT
0,4.22645
V
0,15.6593322753906
V
-1,0
BOT
0,4.23311666666667
V
0,15.599250793457
V
-1,0
BOT
0,4.23978333333333
V
0,15.6097412109375
V
-1,0
BOT
0,4.24645
V
0,15.6731605529785
V
-1,0
BOT
0,4.25311666666667
V
0,15.7766342163086
V
-1,0
BOT
0,4.25978333333333
V
0,15.9111022949219
V
-1,0
BOT
0,4.26645
V
0,16.0698890686035
V
-1,0
BOT
0,4.27311666666667
V
0,16.2501335144043
V
-1,0
BOT
0,4.27978333333333
V
0,16.4508819580078
V
-1,0
BOT
0,4.28645
V
0,16.6749954223633
V
-1,0
BOT
0,4.29311666666667
V
0,16.9305801391602
V
-1,0
BOT
0,4.29978333333333
V
0,17.2328948974609
V
-1,0
BOT
0,4.30645
V
0,17.606258392334
V
-1,0
BOT
0,4.31311666666667
V
0,18.0902481079102
V
-1,0
BOT
0,4.31978333333333
V
0,18.7373161315918
V
-1,0
BOT
0,4.32645
V
0,19.6199417114258
V
-1,0
BOT
0,4.33311666666667
V
0,20.8263397216797
V
-1,0
BOT
0,4.33978333333333
V
0,22.4556922912598
V
-1,0
BOT
0,4.34645
V
0,24.6100425720215
V
-1,0
BOT
0,4.35311666666667
V
0,27.3852348327637
V
-1,0
BOT
0,4.35978333333333
V
0,30.860424041748
V
-1,0
BOT
0,4.36645
V
0,35.0804328918457
V
-1,0
BOT
0,4.37311666666667
V
0,40.0385856628418
V
-1,0
BOT
0,4.37978333333333
V
0,45.6576347351074
V
-1,0
BOT
0,4.38645
V
0,51.7740249633789
V
-1,0
BOT
0,4.39311666666667
V
0,58.1378936767578
V
-1,0
BOT
0,4.39978333333333
V
0,64.4283294677734
V
-1,0
BOT
0,4.40645
V
0,70.2896118164063
V
-1,0
BOT
0,4.41311666666667
V
0,75.3774642944336
V
-1,0
BOT
0,4.41978333333333
V
0,79.4072151184082
V
-1,0
BOT
0,4.42645
V
0,82.1895599365234
V
-1,0
BOT
0,4.43311666666667
V
0,83.6548805236816
V
-1,0
BOT
0,4.43978333333333
V
0,83.8432312011719
V
-1,0
BOT
0,4.44645
V
0,82.8857421875
V
-1,0
BOT
0,4.45311666666667
V
0,80.9698104858398
V
-1,0
BOT
0,4.45978333333333
V
0,78.3076286315918
V
-1,0
BOT
0,4.46645
V
0,75.1113891601563
V
-1,0
BOT
0,4.47311666666667
V
0,71.5756416320801
V
-1,0
BOT
0,4.47978333333333
V
0,67.8682327270508
V
-1,0
BOT
0,4.48645
V
0,64.1269683837891
V
-1,0
BOT
0,4.49311666666667
V
0,60.4615211486816
V
-1,0
BOT
0,4.49978333333333
V
0,56.9567680358887
V
-1,0
BOT
0,4.50645
V
0,53.6761283874512
V
-1,0
BOT
0,4.51311666666667
V
0,50.6668090820313
V
-1,0
BOT
0,4.51978333333333
V
0,47.9612350463867
V
-1,0
BOT
0,4.52645
V
0,45.5799102783203
V
-1,0
BOT
0,4.53311666666667
V
0,43.5338020324707
V
-1,0
BOT
0,4.53978333333333
V
0,41.8243408203125
V
-1,0
BOT
0,4.54645
V
0,40.4458045959473
V
-1,0
BOT
0,4.55311666666667
V
0,39.3862724304199
V
-1,0
BOT
0,4.55978333333333
V
0,38.6271476745605
V
-1,0
BOT
0,4.56645
V
0,38.14697265625
V
-1,0
BOT
0,4.57311666666667
V
0,37.9228591918945
V
-1,0
BOT
0,4.57978333333333
V
0,37.9295349121094
V
-1,0
BOT
0,4.58645
V
0,38.142204284668
V
-1,0
BOT
0,4.59311666666667
V
0,38.5398864746094
V
-1,0
BOT
0,4.59978333333333
V
0,39.1035079956055
V
-1,0
BOT
0,4.60645
V
0,39.818286895752
V
-1,0
BOT
0,4.61311666666667
V
0,40.675163269043
V
-1,0
BOT
0,4.61978333333333
V
0,41.6746139526367
V
-1,0
BOT
0,4.62645
V
0,42.8280830383301
V
-1,0
BOT
0,4.63311666666667
V
0,44.1660881042481
V
-1,0
BOT
0,4.63978333333333
V
0,45.7463264465332
V
-1,0
BOT
0,4.64645
V
0,47.6694107055664
V
-1,0
BOT
0,4.65311666666667
V
0,50.0931739807129
V
-1,0
BOT
0,4.65978333333333
V
0,53.2550811767578
V
-1,0
BOT
0,4.66645
V
0,57.4951171875
V
-1,0
BOT
0,4.67311666666667
V
0,63.2734298706055
V
-1,0
BOT
0,4.67978333333333
V
0,71.1770057678223
V
-1,0
BOT
0,4.68645
V
0,81.9110870361328
V
-1,0
BOT
0,4.69311666666667
V
0,96.2591171264648
V
-1,0
BOT
0,4.69978333333333
V
0,115.0221824646
V
-1,0
BOT
0,4.70645
V
0,138.92126083374
V
-1,0
BOT
0,4.71311666666667
V
0,168.472290039062
V
-1,0
BOT
0,4.71978333333333
V
0,203.838348388672
V
-1,0
BOT
0,4.72645
V
0,244.682312011719
V
-1,0
BOT
0,4.73311666666667
V
0,290.06290435791
V
-1,0
BOT
0,4.73978333333333
V
0,338.384628295898
V
-1,0
BOT
0,4.74645
V
0,387.43257522583
V
-1,0
BOT
0,4.75311666666667
V
0,434.502124786377
V
-1,0
BOT
0,4.75978333333333
V
0,476.634502410889
V
-1,0
BOT
0,4.76645
V
0,510.931968688965
V
-1,0
BOT
0,4.77311666666667
V
0,534.897804260254
V
-1,0
BOT
0,4.77978333333333
V
0,546.741962432861
V
-1,0
BOT
0,4.78645
V
0,545.607089996338
V
-1,0
BOT
0,4.79311666666667
V
0,531.677722930908
V
-1,0
BOT
0,4.79978333333333
V
0,506.144523620606
V
-1,0
BOT
0,4.80645
V
0,471.025466918945
V
-1,0
BOT
0,4.81311666666667
V
0,428.884029388428
V
-1,0
BOT
0,4.81978333333333
V
0,382.500648498535
V
-1,0
BOT
0,4.82645
V
0,334.572792053223
V
-1,0
BOT
0,4.83311666666667
V
0,287.461280822754
V
-1,0
BOT
0,4.83978333333333
V
0,243.024826049805
V
-1,0
BOT
0,4.84645
V
0,202.548980712891
V
-1,0
BOT
0,4.85311666666667
V
0,166.763305664062
V
-1,0
BOT
0,4.85978333333333
V
0,135.924816131592
V
-1,0
BOT
0,4.86645
V
0,109.924793243408
V
-1,0
BOT
0,4.87311666666667
V
0,88.4065628051758
V
-1,0
BOT
0,4.87978333333333
V
0,70.8680152893066
V
-1,0
BOT
0,4.88645
V
0,56.7512512207031
V
-1,0
BOT
0,4.89311666666667
V
0,45.5036163330078
V
-1,0
BOT
0,4.89978333333333
V
0,36.616325378418
V
-1,0
BOT
0,4.90645
V
0,29.6411514282227
V
-1,0
BOT
0,4.91311666666667
V
0,24.1942405700684
V
-1,0
BOT
0,4.91978333333333
V
0,19.956111907959
V
-1,0
BOT
0,4.92645
V
0,16.667366027832
V
-1,0
BOT
0,4.93311666666667
V
0,14.1191482543945
V
-1,0
BOT
0,4.93978333333333
V
0,12.1455192565918
V
-1,0
BOT
0,4.94645
V
0,10.6163024902344
V
-1,0
BOT
0,4.95311666666667
V
0,9.42897796630859
V
-1,0
BOT
0,4.95978333333333
V
0,8.50486755371094
V
-1,0
BOT
0,4.96645
V
0,7.78341293334961
V
-1,0
BOT
0,4.97311666666667
V
0,7.21979141235352
V
-1,0
BOT
0,4.97978333333333
V
0,6.77967071533203
V
-1,0
BOT
0,4.98645
V
0,6.43825531005859
V
-1,0
BOT
0,4.99311666666667
V
0,6.17742538452148
V
-1,0
BOT
0,4.99978333333333
V
0,5.98287582397461
V
-1,0
BOT
0,5.00645
V
0,5.84602355957031
V
-1,0
BOT
0,5.01311666666667
V
0,5.75876235961914
V
-1,0
BOT
0,5.01978333333333
V
0,5.71489334106445
V
-1,0
BOT
0,5.02645
V
0,5.71060180664063
V
-1,0
BOT
0,5.03311666666667
V
0,5.74111938476563
V
-1,0
BOT
0,5.03978333333333
V
0,5.80215454101563
V
-1,0
BOT
0,5.04645
V
0,5.8894157409668
V
-1,0
BOT
0,5.05311666666667
V
0,6.00004196166992
V
-1,0
BOT
0,5.05978333333333
V
0,6.13164901733398
V
-1,0
BOT
0,5.06645
V
0,6.28280639648438
V
-1,0
BOT
0,5.07311666666667
V
0,6.45351409912109
V
-1,0
BOT
0,5.07978333333333
V
0,6.64281845092773
V
-1,0
BOT
0,5.08645
V
0,6.8516731262207
V
-1,0
BOT
0,5.09311666666667
V
0,7.0796012878418
V
-1,0
BOT
0,5.09978333333333
V
0,7.32564926147461
V
-1,0
BOT
0,5.10645
V
0,7.58552551269531
V
-1,0
BOT
0,5.11311666666667
V
0,7.85255432128906
V
-1,0
BOT
0,5.11978333333333
V
0,8.11910629272461
V
-1,0
BOT
0,5.12645
V
0,8.37326049804688
V
-1,0
BOT
0,5.13311666666667
V
0,8.60309600830078
V
-1,0
BOT
0,5.13978333333334
V
0,8.79478454589844
V
-1,0
BOT
0,5.14645
V
0,8.93688201904297
V
-1,0
BOT
0,5.15311666666667
V
0,9.02032852172852
V
-1,0
BOT
0,5.15978333333333
V
0,9.03844833374023
V
-1,0
BOT
0,5.16645
V
0,8.98933410644531
V
-1,0
BOT
0,5.17311666666667
V
0,8.87489318847656
V
-1,0
BOT
0,5.17978333333334
V
0,8.70180130004883
V
-1,0
BOT
0,5.18645
V
0,8.47911834716797
V
-1,0
BOT
0,5.19311666666667
V
0,8.21781158447266
V
-1,0
BOT
0,5.19978333333333
V
0,7.93027877807617
V
-1,0
BOT
0,5.20645
V
0,7.62844085693359
V
-1,0
BOT
0,5.21311666666667
V
0,7.3237419128418
V
-1,0
BOT
0,5.21978333333334
V
0,7.02667236328125
V
-1,0
BOT
0,5.22645
V
0,6.74533843994141
V
-1,0
BOT
0,5.23311666666667
V
0,6.4849853515625
V
-1,0
BOT
0,5.23978333333333
V
0,6.25038146972656
V
-1,0
BOT
0,5.24645
V
0,6.04343414306641
V
-1,0
BOT
0,5.25311666666667
V
0,5.86509704589844
V
-1,0
BOT
0,5.25978333333334
V
0,5.71680068969727
V
-1,0
BOT
0,5.26645
V
0,5.59854507446289
V
-1,0
BOT
0,5.27311666666667
V
0,5.51033020019531
V
-1,0
BOT
0,5.27978333333333
V
0,5.45120239257813
V
-1,0
BOT
0,5.28645
V
0,5.42211532592773
V
-1,0
BOT
0,5.29311666666667
V
0,5.42163848876953
V
-1,0
BOT
0,5.29978333333334
V
0,5.4469108581543
V
-1,0
BOT
0,5.30645
V
0,5.49650192260742
V
-1,0
BOT
0,5.31311666666667
V
0,5.56564331054688
V
-1,0
BOT
0,5.31978333333333
V
0,5.65004348754883
V
-1,0
BOT
0,5.32645
V
0,5.74398040771484
V
-1,0
BOT
0,5.33311666666667
V
0,5.83982467651367
V
-1,0
BOT
0,5.33978333333334
V
0,5.92994689941406
V
-1,0
BOT
0,5.34645
V
0,6.00671768188477
V
-1,0
BOT
0,5.35311666666667
V
0,6.06298446655273
V
-1,0
BOT
0,5.35978333333333
V
0,6.09302520751953
V
-1,0
BOT
0,5.36645
V
0,6.09302520751953
V
-1,0
BOT
0,5.37311666666667
V
0,6.06155395507813
V
-1,0
BOT
0,5.37978333333334
V
0,5.99908828735352
V
-1,0
BOT
0,5.38645
V
0,5.90801239013672
V
-1,0
BOT
0,5.39311666666667
V
0,5.79261779785156
V
-1,0
BOT
0,5.39978333333333
V
0,5.65814971923828
V
-1,0
BOT
0,5.40645
V
0,5.51033020019531
V
-1,0
BOT
0,5.41311666666667
V
0,5.3558349609375
V
-1,0
BOT
0,5.41978333333334
V
0,5.20133972167969
V
-1,0
BOT
0,5.42645
V
0,5.0506591796875
V
-1,0
BOT
0,5.43311666666667
V
0,4.90951538085938
V
-1,0
BOT
0,5.43978333333333
V
0,4.78124618530273
V
-1,0
BOT
0,5.44645
V
0,4.66728210449219
V
-1,0
BOT
0,5.45311666666667
V
0,4.56953048706055
V
-1,0
BOT
0,5.45978333333334
V
0,4.48703765869141
V
-1,0
BOT
0,5.46645
V
0,4.42075729370117
V
-1,0
BOT
0,5.47311666666667
V
0,4.36925888061523
V
-1,0
BOT
0,5.47978333333333
V
0,4.33111190795898
V
-1,0
BOT
0,5.48645
V
0,4.30488586425781
V
-1,0
BOT
0,5.49311666666667
V
0,4.28867340087891
V
-1,0
BOT
0,5.49978333333334
V
0,4.28104400634766
V
-1,0
BOT
0,5.50645
V
0,4.28152084350586
V
-1,0
BOT
0,5.51311666666667
V
0,4.2881965637207
V
-1,0
BOT
0,5.51978333333333
V
0,4.30011749267578
V
-1,0
BOT
0,5.52645
V
0,4.31680679321289
V
-1,0
BOT
0,5.53311666666667
V
0,4.33731079101563
V
-1,0
BOT
0,5.53978333333334
V
0,4.36162948608398
V
-1,0
BOT
0,5.54645
V
0,4.38880920410156
V
-1,0
BOT
0,5.55311666666667
V
0,4.41837310791016
V
-1,0
BOT
0,5.55978333333333
V
0,4.45032119750977
V
-1,0
BOT
0,5.56645
V
0,4.48369979858398
V
-1,0
BOT
0,5.57311666666667
V
0,4.51898574829102
V
-1,0
BOT
0,5.57978333333333
V
0,4.55570220947266
V
-1,0
BOT
0,5.58645
V
0,4.5933723449707
V
-1,0
BOT
0,5.59311666666667
V
0,4.63247299194336
V
-1,0
BOT
0,5.59978333333333
V
0,4.67109680175781
V
-1,0
BOT
0,5.60645
V
0,4.71067428588867
V
-1,0
BOT
0,5.61311666666667
V
0,4.74977493286133
V
-1,0
BOT
0,5.61978333333333
V
0,4.78792190551758
V
-1,0
BOT
0,5.62645
V
0,4.82606887817383
V
-1,0
BOT
0,5.63311666666667
V
0,4.86230850219727
V
-1,0
BOT
0,5.63978333333333
V
0,4.8975944519043
V
-1,0
BOT
0,5.64645
V
0,4.93144989013672
V
-1,0
BOT
0,5.65311666666667
V
0,4.96292114257813
V
-1,0
BOT
0,5.65978333333333
V
0,4.99200820922852
V
-1,0
BOT
0,5.66645
V
0,5.01871109008789
V
-1,0
BOT
0,5.67311666666667
V
0,5.04255294799805
V
-1,0
BOT
0,5.67978333333333
V
0,5.06448745727539
V
-1,0
BOT
0,5.68645
V
0,5.08451461791992
V
-1,0
BOT
0,5.69311666666667
V
0,5.10358810424805
V
-1,0
BOT
0,5.69978333333333
V
0,5.12266159057617
V
-1,0
BOT
0,5.70645
V
0,5.1426887512207
V
-1,0
BOT
0,5.71311666666667
V
0,5.16462326049805
V
-1,0
BOT
0,5.71978333333333
V
0,5.1884651184082
V
-1,0
BOT
0,5.72645
V
0,5.21612167358398
V
-1,0
BOT
0,5.73311666666667
V
0,5.24759292602539
V
-1,0
BOT
0,5.73978333333333
V
0,5.28383255004883
V
-1,0
BOT
0,5.74645
V
0,5.3253173828125
V
-1,0
BOT
0,5.75311666666667
V
0,5.3715705871582
V
-1,0
BOT
0,5.75978333333333
V
0,5.42259216308594
V
-1,0
BOT
0,5.76645
V
0,5.4783821105957
V
-1,0
BOT
0,5.77311666666667
V
0,5.53750991821289
V
-1,0
BOT
0,5.77978333333333
V
0,5.59806823730469
V
-1,0
BOT
0,5.78645
V
0,5.65862655639648
V
-1,0
BOT
0,5.79311666666667
V
0,5.71584701538086
V
-1,0
BOT
0,5.79978333333333
V
0,5.7682991027832
V
-1,0
BOT
0,5.80645
V
0,5.8140754699707
V
-1,0
BOT
0,5.81311666666667
V
0,5.85126876831055
V
-1,0
BOT
0,5.81978333333333
V
0,5.87940216064453
V
-1,0
BOT
0,5.82645
V
0,5.89752197265625
V
-1,0
BOT
0,5.83311666666667
V
0,5.90658187866211
V
-1,0
BOT
0,5.83978333333333
V
0,5.90658187866211
V
-1,0
BOT
0,5.84645
V
0,5.89942932128906
V
-1,0
BOT
0,5.85311666666667
V
0,5.88607788085938
V
-1,0
BOT
0,5.85978333333333
V
0,5.86843490600586
V
-1,0
BOT
0,5.86645
V
0,5.84745407104492
V
-1,0
BOT
0,5.87311666666667
V
0,5.82551956176758
V
-1,0
BOT
0,5.87978333333333
V
0,5.80310821533203
V
-1,0
BOT
0,5.88645
V
0,5.78069686889648
V
-1,0
BOT
0,5.89311666666667
V
0,5.75923919677734
V
-1,0
BOT
0,5.89978333333333
V
0,5.73873519897461
V
-1,0
BOT
0,5.90645
V
0,5.71870803833008
V
-1,0
BOT
0,5.91311666666667
V
0,5.69915771484375
V
-1,0
BOT
0,5.91978333333333
V
0,5.68056106567383
V
-1,0
BOT
0,5.92645
V
0,5.66291809082031
V
-1,0
BOT
0,5.93311666666667
V
0,5.64718246459961
V
-1,0
BOT
0,5.93978333333333
V
0,5.63335418701172
V
-1,0
BOT
0,5.94645
V
0,5.62238693237305
V
-1,0
BOT
0,5.95311666666667
V
0,5.615234375
V
-1,0
BOT
0,5.95978333333333
V
0,5.61189651489258
V
-1,0
BOT
0,5.96645
V
0,5.61332702636719
V
-1,0
BOT
0,5.97311666666667
V
0,5.61904907226563
V
-1,0
BOT
0,5.97978333333333
V
0,5.62906265258789
V
-1,0
BOT
0,5.98645
V
0,5.64289093017578
V
-1,0
BOT
0,5.99311666666667
V
0,5.6610107421875
V
-1,0
BOT
0,5.99978333333333
V
0,5.68151473999023
V
-1,0
BOT
0,6.00645
V
0,5.70392608642578
V
-1,0
BOT
0,6.01311666666667
V
0,5.72824478149414
V
-1,0
BOT
0,6.01978333333333
V
0,5.7520866394043
V
-1,0
BOT
0,6.02645
V
0,5.77545166015625
V
-1,0
BOT
0,6.03311666666667
V
0,5.79690933227539
V
-1,0
BOT
0,6.03978333333333
V
0,5.81550598144531
V
-1,0
BOT
0,6.04645
V
0,5.83124160766602
V
-1,0
BOT
0,6.05311666666667
V
0,5.8445930480957
V
-1,0
BOT
0,6.05978333333333
V
0,5.85699081420898
V
-1,0
BOT
0,6.06645
V
0,5.86891174316406
V
-1,0
BOT
0,6.07311666666667
V
0,5.88130950927734
V
-1,0
BOT
0,6.07978333333333
V
0,5.89466094970703
V
-1,0
BOT
0,6.08645
V
0,5.91087341308594
V
-1,0
BOT
0,6.09311666666667
V
0,5.93042373657227
V
-1,0
BOT
0,6.09978333333333
V
0,5.95426559448242
V
-1,0
BOT
0,6.10645
V
0,5.98239898681641
V
-1,0
BOT
0,6.11311666666667
V
0,6.01577758789063
V
-1,0
BOT
0,6.11978333333333
V
0,6.05392456054688
V
-1,0
BOT
0,6.12645
V
0,6.09683990478516
V
-1,0
BOT
0,6.13311666666667
V
0,6.14213943481445
V
-1,0
BOT
0,6.13978333333333
V
0,6.18934631347656
V
-1,0
BOT
0,6.14645
V
0,6.23703002929688
V
-1,0
BOT
0,6.15311666666667
V
0,6.28328323364258
V
-1,0
BOT
0,6.15978333333333
V
0,6.32667541503906
V
-1,0
BOT
0,6.16645
V
0,6.36672973632813
V
-1,0
BOT
0,6.17311666666667
V
0,6.40106201171875
V
-1,0
BOT
0,6.17978333333334
V
0,6.43014907836914
V
-1,0
BOT
0,6.18645
V
0,6.45256042480469
V
-1,0
BOT
0,6.19311666666667
V
0,6.46877288818359
V
-1,0
BOT
0,6.19978333333333
V
0,6.47878646850586
V
-1,0
BOT
0,6.20645
V
0,6.48403167724609
V
-1,0
BOT
0,6.21311666666667
V
0,6.48593902587891
V
-1,0
BOT
0,6.21978333333333
V
0,6.48593902587891
V
-1,0
BOT
0,6.22645
V
0,6.48641586303711
V
-1,0
BOT
0,6.23311666666667
V
0,6.49023056030273
V
-1,0
BOT
0,6.23978333333333
V
0,6.500244140625
V
-1,0
BOT
0,6.24645
V
0,6.52122497558594
V
-1,0
BOT
0,6.25311666666667
V
0,6.55698776245117
V
-1,0
BOT
0,6.25978333333334
V
0,6.61563873291016
V
-1,0
BOT
0,6.26645
V
0,6.70480728149414
V
-1,0
BOT
0,6.27311666666667
V
0,6.8359375
V
-1,0
BOT
0,6.27978333333333
V
0,7.02285766601563
V
-1,0
BOT
0,6.28645
V
0,7.28130340576172
V
-1,0
BOT
0,6.29311666666667
V
0,7.63082504272461
V
-1,0
BOT
0,6.29978333333333
V
0,8.09144973754883
V
-1,0
BOT
0,6.30645
V
0,8.68558883666992
V
-1,0
BOT
0,6.31311666666667
V
0,9.43613052368164
V
-1,0
BOT
0,6.31978333333333
V
0,10.3616714477539
V
-1,0
BOT
0,6.32645
V
0,11.4760398864746
V
-1,0
BOT
0,6.33311666666667
V
0,12.7863883972168
V
-1,0
BOT
0,6.33978333333334
V
0,14.2874717712402
V
-1,0
BOT
0,6.34645
V
0,15.9597396850586
V
-1,0
BOT
0,6.35311666666667
V
0,17.7693367004395
V
-1,0
BOT
0,6.35978333333333
V
0,19.6685791015625
V
-1,0
BOT
0,6.36645
V
0,21.5921401977539
V
-1,0
BOT
0,6.37311666666667
V
0,23.4651565551758
V
-1,0
BOT
0,6.37978333333333
V
0,25.2022743225098
V
-1,0
BOT
0,6.38645
V
0,26.7195701599121
V
-1,0
BOT
0,6.39311666666667
V
0,27.9355049133301
V
-1,0
BOT
0,6.39978333333333
V
0,28.7814140319824
V
-1,0
BOT
0,6.40645
V
0,29.2062759399414
V
-1,0
BOT
0,6.41311666666667
V
0,29.1833877563477
V
-1,0
BOT
0,6.41978333333334
V
0,28.7137031555176
V
-1,0
BOT
0,6.42645
V
0,27.8244018554687
V
-1,0
BOT
0,6.43311666666667
V
0,26.5674591064453
V
-1,0
BOT
0,6.43978333333333
V
0,25.0148773193359
V
-1,0
BOT
0,6.44645
V
0,23.2510566711426
V
-1,0
BOT
0,6.45311666666667
V
0,21.3656425476074
V
-1,0
BOT
0,6.45978333333333
V
0,19.4454193115234
V
-1,0
BOT
0,6.46645
V
0,17.5690650939941
V
-1,0
BOT
0,6.47311666666667
V
0,15.7995223999023
V
-1,0
BOT
0,6.47978333333333
V
0,14.1844749450684
V
-1,0
BOT
0,6.48645
V
0,12.7530097961426
V
-1,0
BOT
0,6.49311666666667
V
0,11.5194320678711
V
-1,0
BOT
0,6.49978333333334
V
0,10.4851722717285
V
-1,0
BOT
0,6.50645
V
0,9.64069366455078
V
-1,0
BOT
0,6.51311666666667
V
0,8.96930694580078
V
-1,0
BOT
0,6.51978333333333
V
0,8.45098495483398
V
-1,0
BOT
0,6.52645
V
0,8.06474685668945
V
-1,0
BOT
0,6.53311666666667
V
0,7.78913497924805
V
-1,0
BOT
0,6.53978333333333
V
0,7.60507583618164
V
-1,0
BOT
0,6.54645
V
0,7.49635696411133
V
-1,0
BOT
0,6.55311666666667
V
0,7.44724273681641
V
-1,0
BOT
0,6.55978333333333
V
0,7.4462890625
V
-1,0
BOT
0,6.56645
V
0,7.48252868652344
V
-1,0
BOT
0,6.57311666666667
V
0,7.54880905151367
V
-1,0
BOT
0,6.57978333333334
V
0,7.63797760009766
V
-1,0
BOT
0,6.58645
V
0,7.74478912353516
V
-1,0
BOT
0,6.59311666666667
V
0,7.86685943603516
V
-1,0
BOT
0,6.59978333333333
V
0,8.00323486328125
V
-1,0
BOT
0,6.60645
V
0,8.15534591674805
V
-1,0
BOT
0,6.61311666666667
V
0,8.32700729370117
V
-1,0
BOT
0,6.61978333333333
V
0,8.52489471435547
V
-1,0
BOT
0,6.62645
V
0,8.75711441040039
V
-1,0
BOT
0,6.63311666666667
V
0,9.03606414794922
V
-1,0
BOT
0,6.63978333333333
V
0,9.37271118164063
V
-1,0
BOT
0,6.64645
V
0,9.7804069519043
V
-1,0
BOT
0,6.65311666666667
V
0,10.2701187133789
V
-1,0
BOT
0,6.65978333333333
V
0,10.8499526977539
V
-1,0
BOT
0,6.66645
V
0,11.5242004394531
V
-1,0
BOT
0,6.67311666666667
V
0,12.291431427002
V
-1,0
BOT
0,6.67978333333333
V
0,13.1421089172363
V
-1,0
BOT
0,6.68645
V
0,14.0604972839355
V
-1,0
BOT
0,6.69311666666667
V
0,15.0237083435059
V
-1,0
BOT
0,6.69978333333333
V
0,16.0002708435059
V
-1,0
BOT
0,6.70645
V
0,16.9539451599121
V
-1,0
BOT
0,6.71311666666667
V
0,17.845630645752
V
-1,0
BOT
0,6.71978333333333
V
0,18.6347961425781
V
-1,0
BOT
0,6.72645
V
0,19.282341003418
V
-1,0
BOT
0,6.73311666666667
V
0,19.7548866271973
V
-1,0
BOT
0,6.73978333333333
V
0,20.0271606445312
V
-1,0
BOT
0,6.74645
V
0,20.0843811035156
V
-1,0
BOT
0,6.75311666666667
V
0,19.9246406555176
V
-1,0
BOT
0,6.75978333333333
V
0,19.5584297180176
V
-1,0
BOT
0,6.76645
V
0,19.0095901489258
V
-1,0
BOT
0,6.77311666666667
V
0,18.3115005493164
V
-1,0
BOT
0,6.77978333333333
V
0,17.5070762634277
V
-1,0
BOT
0,6.78645
V
0,16.6416168212891
V
-1,0
BOT
0,6.79311666666667
V
0,15.7623291015625
V
-1,0
BOT
0,6.79978333333333
V
0,14.9106979370117
V
-1,0
BOT
0,6.80645
V
0,14.122486114502
V
-1,0
BOT
0,6.81311666666667
V
0,13.4234428405762
V
-1,0
BOT
0,6.81978333333333
V
0,12.8283500671387
V
-1,0
BOT
0,6.82645
V
0,12.3429298400879
V
-1,0
BOT
0,6.83311666666667
V
0,11.9614601135254
V
-1,0
BOT
0,6.83978333333333
V
0,11.6710662841797
V
-1,0
BOT
0,6.84645
V
0,11.4526748657227
V
-1,0
BOT
0,6.85311666666667
V
0,11.2853050231934
V
-1,0
BOT
0,6.85978333333333
V
0,11.1465454101562
V
-1,0
BOT
0,6.86645
V
0,11.0149383544922
V
-1,0
BOT
0,6.87311666666667
V
0,10.8728408813477
V
-1,0
BOT
0,6.87978333333333
V
0,10.7078552246094
V
-1,0
BOT
0,6.88645
V
0,10.5123519897461
V
-1,0
BOT
0,6.89311666666667
V
0,10.2839469909668
V
-1,0
BOT
0,6.89978333333333
V
0,10.0255012512207
V
-1,0
BOT
0,6.90645
V
0,9.74321365356445
V
-1,0
BOT
0,6.91311666666667
V
0,9.44662094116211
V
-1,0
BOT
0,6.91978333333333
V
0,9.14573669433594
V
-1,0
BOT
0,6.92645
V
0,8.8505744934082
V
-1,0
BOT
0,6.93311666666667
V
0,8.57019424438477
V
-1,0
BOT
0,6.93978333333333
V
0,8.31222534179688
V
-1,0
BOT
0,6.94645
V
0,8.08095932006836
V
-1,0
BOT
0,6.95311666666667
V
0,7.87925720214844
V
-1,0
BOT
0,6.95978333333333
V
0,7.70807266235352
V
-1,0
BOT
0,6.96645
V
0,7.56597518920898
V
-1,0
BOT
0,6.97311666666667
V
0,7.45010375976563
V
-1,0
BOT
0,6.97978333333333
V
0,7.35807418823242
V
-1,0
BOT
0,6.98645
V
0,7.28654861450195
V
-1,0
BOT
0,6.99311666666667
V
0,7.2321891784668
V
-1,0
BOT
0,6.99978333333333
V
0,7.19213485717773
V
-1,0
BOT
0,7.00645
V
0,7.16304779052734
V
-1,0
BOT
0,7.01311666666667
V
0,7.14302062988281
V
-1,0
BOT
0,7.01978333333333
V
0,7.13109970092773
V
-1,0
BOT
0,7.02645
V
0,7.1253776550293
V
-1,0
BOT
0,7.03311666666667
V
0,7.1258544921875
V
-1,0
BOT
0,7.03978333333333
V
0,7.13396072387695
V
-1,0
BOT
0,7.04645
V
0,7.15351104736328
V
-1,0
BOT
0,7.05311666666667
V
0,7.19499588012695
V
-1,0
BOT
0,7.05978333333333
V
0,7.28178024291992
V
-1,0
BOT
0,7.06645
V
0,7.44867324829102
V
-1,0
BOT
0,7.07311666666667
V
0,7.73525238037109
V
-1,0
BOT
0,7.07978333333333
V
0,8.17012786865234
V
-1,0
BOT
0,7.08645
V
0,8.76140594482422
V
-1,0
BOT
0,7.09311666666667
V
0,9.49001312255859
V
-1,0
BOT
0,7.09978333333333
V
0,10.3187561035156
V
-1,0
BOT
0,7.10645
V
0,11.2037658691406
V
-1,0
BOT
0,7.11311666666667
V
0,12.1059417724609
V
-1,0
BOT
0,7.11978333333333
V
0,13.0000114440918
V
-1,0
BOT
0,7.12645
V
0,13.8735771179199
V
-1,0
BOT
0,7.13311666666667
V
0,14.7199630737305
V
-1,0
BOT
0,7.13978333333333
V
0,15.5320167541504
V
-1,0
BOT
0,7.14645
V
0,16.3006782531738
V
-1,0
BOT
0,7.15311666666667
V
0,17.0192718505859
V
-1,0
BOT
0,7.15978333333333
V
0,17.6858901977539
V
-1,0
BOT
0,7.16645
V
0,18.310546875
V
-1,0
BOT
0,7.17311666666667
V
0,18.9123153686523
V
-1,0
BOT
0,7.17978333333333
V
0,19.5102691650391
V
-1,0
BOT
0,7.18645
V
0,20.1072692871094
V
-1,0
BOT
0,7.19311666666667
V
0,20.6823348999023
V
-1,0
BOT
0,7.19978333333333
V
0,21.1968421936035
V
-1,0
BOT
0,7.20645
V
0,21.6083526611328
V
-1,0
BOT
0,7.21311666666667
V
0,21.8844413757324
V
-1,0
BOT
0,7.21978333333333
V
0,22.0131874084473
V
-1,0
BOT
0,7.22645
V
0,22.0022201538086
V
-1,0
BOT
0,7.23311666666667
V
0,21.8744277954102
V
-1,0
BOT
0,7.23978333333333
V
0,21.6622352600098
V
-1,0
BOT
0,7.24645
V
0,21.3980674743652
V
-1,0
BOT
0,7.25311666666667
V
0,21.1043357849121
V
-1,0
BOT
0,7.25978333333333
V
0,20.7953453063965
V
-1,0
BOT
0,7.26645
V
0,20.4763412475586
V
-1,0
BOT
0,7.27311666666667
V
0,20.1501846313477
V
-1,0
BOT
0,7.27978333333333
V
0,19.8187828063965
V
-1,0
BOT
0,7.28645
V
0,19.4835662841797
V
-1,0
BOT
0,7.29311666666667
V
0,19.1464424133301
V
-1,0
BOT
0,7.29978333333333
V
0,18.8088417053223
V
-1,0
BOT
0,7.30645
V
0,18.4717178344727
V
-1,0
BOT
0,7.31311666666667
V
0,18.1350708007812
V
-1,0
BOT
0,7.31978333333333
V
0,17.7984237670898
V
-1,0
BOT
0,7.32645
V
0,17.4612998962402
V
-1,0
BOT
0,7.33311666666667
V
0,17.1222686767578
V
-1,0
BOT
0,7.33978333333333
V
0,16.779899597168
V
-1,0
BOT
0,7.34645
V
0,16.4322853088379
V
-1,0
BOT
0,7.35311666666667
V
0,16.077995300293
V
-1,0
BOT
0,7.35978333333333
V
0,15.7160758972168
V
-1,0
BOT
0,7.36645
V
0,15.3470039367676
V
-1,0
BOT
0,7.37311666666667
V
0,14.9726867675781
V
-1,0
BOT
0,7.37978333333333
V
0,14.5940780639648
V
-1,0
BOT
0,7.38645
V
0,14.2145156860352
V
-1,0
BOT
0,7.39311666666667
V
0,13.8368606567383
V
-1,0
BOT
0,7.39978333333333
V
0,13.4639739990234
V
-1,0
BOT
0,7.40645
V
0,13.0996704101562
V
-1,0
BOT
0,7.41311666666667
V
0,12.7458572387695
V
-1,0
BOT
0,7.41978333333333
V
0,12.4049186706543
V
-1,0
BOT
0,7.42645
V
0,12.0782852172852
V
-1,0
BOT
0,7.43311666666667
V
0,11.7669105529785
V
-1,0
BOT
0,7.43978333333333
V
0,11.4693641662598
V
-1,0
BOT
0,7.44645
V
0,11.1846923828125
V
-1,0
BOT
0,7.45311666666667
V
0,10.9119415283203
V
-1,0
BOT
0,7.45978333333333
V
0,10.6496810913086
V
-1,0
BOT
0,7.46645
V
0,10.3964805603027
V
-1,0
BOT
0,7.47311666666667
V
0,10.1504325866699
V
-1,0
BOT
0,7.47978333333333
V
0,9.91010665893555
V
-1,0
BOT
0,7.48645
V
0,9.674072265625
V
-1,0
BOT
0,7.49311666666667
V
0,9.44232940673828
V
-1,0
BOT
0,7.49978333333333
V
0,9.21392440795898
V
-1,0
BOT
0,7.50645
V
0,8.98933410644531
V
-1,0
BOT
0,7.51311666666667
V
0,8.76903533935547
V
-1,0
BOT
0,7.51978333333333
V
0,8.55541229248047
V
-1,0
BOT
0,7.52645
V
0,8.34894180297852
V
-1,0
BOT
0,7.53311666666667
V
0,8.15105438232422
V
-1,0
BOT
0,7.53978333333333
V
0,7.96365737915039
V
-1,0
BOT
0,7.54645
V
0,7.78770446777344
V
-1,0
BOT
0,7.55311666666667
V
0,7.62557983398438
V
-1,0
BOT
0,7.55978333333333
V
0,7.47823715209961
V
-1,0
BOT
0,7.56645
V
0,7.34710693359375
V
-1,0
BOT
0,7.57311666666667
V
0,7.23361968994141
V
-1,0
BOT
0,7.57978333333333
V
0,7.13968276977539
V
-1,0
BOT
0,7.58645
V
0,7.0648193359375
V
-1,0
BOT
0,7.59311666666667
V
0,7.00902938842773
V
-1,0
BOT
0,7.59978333333333
V
0,6.97231292724609
V
-1,0
BOT
0,7.60645
V
0,6.95419311523438
V
-1,0
BOT
0,7.61311666666667
V
0,6.95419311523438
V
-1,0
BOT
0,7.61978333333333
V
0,6.96992874145508
V
-1,0
BOT
0,7.62645
V
0,6.99996948242188
V
-1,0
BOT
0,7.63311666666667
V
0,7.04336166381836
V
-1,0
BOT
0,7.63978333333334
V
0,7.09819793701172
V
-1,0
BOT
0,7.64645
V
0,7.16161727905273
V
-1,0
BOT
0,7.65311666666667
V
0,7.2321891784668
V
-1,0
BOT
0,7.65978333333333
V
0,7.31039047241211
V
-1,0
BOT
0,7.66645
V
0,7.39431381225586
V
-1,0
BOT
0,7.67311666666667
V
0,7.48348236083984
V
-1,0
BOT
0,7.67978333333334
V
0,7.57789611816406
V
-1,0
BOT
0,7.68645
V
0,7.67755508422852
V
-1,0
BOT
0,7.69311666666667
V
0,7.7824592590332
V
-1,0
BOT
0,7.69978333333333
V
0,7.89356231689453
V
-1,0
BOT
0,7.70645
V
0,8.00991058349609
V
-1,0
BOT
0,7.71311666666667
V
0,8.1329345703125
V
-1,0
BOT
0,7.71978333333334
V
0,8.26168060302734
V
-1,0
BOT
0,7.72645
V
0,8.39662551879883
V
-1,0
BOT
0,7.73311666666667
V
0,8.53776931762695
V
-1,0
BOT
0,7.73978333333333
V
0,8.68511199951172
V
-1,0
BOT
0,7.74645
V
0,8.83817672729492
V
-1,0
BOT
0,7.75311666666667
V
0,8.99696350097656
V
-1,0
BOT
0,7.75978333333334
V
0,9.16147232055664
V
-1,0
BOT
0,7.76645
V
0,9.33122634887695
V
-1,0
BOT
0,7.77311666666667
V
0,9.50527191162109
V
-1,0
BOT
0,7.77978333333333
V
0,9.68265533447266
V
-1,0
BOT
0,7.78645
V
0,9.86099243164063
V
-1,0
BOT
0,7.79311666666667
V
0,10.0388526916504
V
-1,0
BOT
0,7.79978333333334
V
0,10.2128982543945
V
-1,0
BOT
0,7.80645
V
0,10.3802680969238
V
-1,0
BOT
0,7.81311666666667
V
0,10.5376243591309
V
-1,0
BOT
0,7.81978333333333
V
0,10.6816291809082
V
-1,0
BOT
0,7.82645
V
0,10.8089447021484
V
-1,0
BOT
0,7.83311666666667
V
0,10.9176635742187
V
-1,0
BOT
0,7.83978333333334
V
0,11.0049247741699
V
-1,0
BOT
0,7.84645
V
0,11.0697746276855
V
-1,0
BOT
0,7.85311666666667
V
0,11.1126899719238
V
-1,0
BOT
0,7.85978333333333
V
0,11.1336708068848
V
-1,0
BOT
0,7.86645
V
0,11.1351013183594
V
-1,0
BOT
0,7.87311666666667
V
0,11.1193656921387
V
-1,0
BOT
0,7.87978333333334
V
0,11.0898017883301
V
-1,0
BOT
0,7.88645
V
0,11.0502243041992
V
-1,0
BOT
0,7.89311666666667
V
0,11.0044479370117
V
-1,0
BOT
0,7.89978333333333
V
0,10.9572410583496
V
-1,0
BOT
0,7.90645
V
0,10.9128952026367
V
-1,0
BOT
0,7.91311666666667
V
0,10.8747482299805
V
-1,0
BOT
0,7.91978333333334
V
0,10.8461380004883
V
-1,0
BOT
0,7.92645
V
0,10.8280181884766
V
-1,0
BOT
0,7.93311666666667
V
0,10.8218193054199
V
-1,0
BOT
0,7.93978333333333
V
0,10.8270645141602
V
-1,0
BOT
0,7.94645
V
0,10.8418464660645
V
-1,0
BOT
0,7.95311666666667
V
0,10.8652114868164
V
-1,0
BOT
0,7.95978333333334
V
0,10.8942985534668
V
-1,0
BOT
0,7.96645
V
0,10.9267234802246
V
-1,0
BOT
0,7.97311666666667
V
0,10.960578918457
V
-1,0
BOT
0,7.97978333333333
V
0,10.9944343566895
V
-1,0
BOT
0,7.98645
V
0,11.0268592834473
V
-1,0
BOT
0,7.99311666666667
V
0,11.0564231872559
V
-1,0
BOT
0,7.99978333333334
V
0,11.0831260681152
V
-1,0
BOT
0,8.00645
V
0,11.1055374145508
V
-1,0
BOT
0,8.01311666666667
V
0,11.1241340637207
V
-1,0
BOT
0,8.01978333333333
V
0,11.1370086669922
V
-1,0
BOT
0,8.02645
V
0,11.1432075500488
V
-1,0
BOT
0,8.03311666666667
V
0,11.141300201416
V
-1,0
BOT
0,8.03978333333333
V
0,11.1303329467773
V
-1,0
BOT
0,8.04645
V
0,11.1112594604492
V
-1,0
BOT
0,8.05311666666667
V
0,11.0845565795898
V
-1,0
BOT
0,8.05978333333333
V
0,11.0516548156738
V
-1,0
BOT
0,8.06645
V
0,11.0158920288086
V
-1,0
BOT
0,8.07311666666667
V
0,10.9810829162598
V
-1,0
BOT
0,8.07978333333333
V
0,10.9524726867676
V
-1,0
BOT
0,8.08645
V
0,10.9362602233887
V
-1,0
BOT
0,8.09311666666667
V
0,10.9400749206543
V
-1,0
BOT
0,8.09978333333333
V
0,10.9705924987793
V
-1,0
BOT
0,8.10645
V
0,11.0344886779785
V
-1,0
BOT
0,8.11311666666667
V
0,11.138916015625
V
-1,0
BOT
0,8.11978333333333
V
0,11.2881660461426
V
-1,0
BOT
0,8.12645
V
0,11.4850997924805
V
-1,0
BOT
0,8.13311666666667
V
0,11.7311477661133
V
-1,0
BOT
0,8.13978333333333
V
0,12.0244026184082
V
-1,0
BOT
0,8.14645
V
0,12.3610496520996
V
-1,0
BOT
0,8.15311666666667
V
0,12.7353668212891
V
-1,0
BOT
0,8.15978333333333
V
0,13.1373405456543
V
-1,0
BOT
0,8.16645
V
0,13.5555267333984
V
-1,0
BOT
0,8.17311666666667
V
0,13.97705078125
V
-1,0
BOT
0,8.17978333333333
V
0,14.3871307373047
V
-1,0
BOT
0,8.18645
V
0,14.7695541381836
V
-1,0
BOT
0,8.19311666666667
V
0,15.1095390319824
V
-1,0
BOT
0,8.19978333333333
V
0,15.3927803039551
V
-1,0
BOT
0,8.20645
V
0,15.6054496765137
V
-1,0
BOT
0,8.21311666666667
V
0,15.7384872436523
V
-1,0
BOT
0,8.21978333333333
V
0,15.7833099365234
V
-1,0
BOT
0,8.22645
V
0,15.7365798950195
V
-1,0
BOT
0,8.23311666666667
V
0,15.5987739562988
V
-1,0
BOT
0,8.23978333333333
V
0,15.3756141662598
V
-1,0
BOT
0,8.24645
V
0,15.0752067565918
V
-1,0
BOT
0,8.25311666666667
V
0,14.70947265625
V
-1,0
BOT
0,8.25978333333333
V
0,14.2917633056641
V
-1,0
BOT
0,8.26645
V
0,13.8382911682129
V
-1,0
BOT
0,8.27311666666667
V
0,13.3652687072754
V
-1,0
BOT
0,8.27978333333333
V
0,12.8879547119141
V
-1,0
BOT
0,8.28645
V
0,12.4201774597168
V
-1,0
BOT
0,8.29311666666667
V
0,11.9733810424805
V
-1,0
BOT
0,8.29978333333333
V
0,11.5571022033691
V
-1,0
BOT
0,8.30645
V
0,11.1780166625977
V
-1,0
BOT
0,8.31311666666667
V
0,10.8394622802734
V
-1,0
BOT
0,8.31978333333333
V
0,10.5423927307129
V
-1,0
BOT
0,8.32645
V
0,10.2858543395996
V
-1,0
BOT
0,8.33311666666667
V
0,10.0679397583008
V
-1,0
BOT
0,8.33978333333333
V
0,9.88388061523438
V
-1,0
BOT
0,8.34645
V
0,9.72890853881836
V
-1,0
BOT
0,8.35311666666667
V
0,9.5982551574707
V
-1,0
BOT
0,8.35978333333333
V
0,9.48667526245117
V
-1,0
BOT
0,8.36645
V
0,9.38892364501953
V
-1,0
BOT
0,8.37311666666667
V
0,9.30023193359375
V
-1,0
BOT
0,8.37978333333333
V
0,9.21440124511719
V
-1,0
BOT
0,8.38645
V
0,9.12809371948242
V
-1,0
BOT
0,8.39311666666667
V
0,9.03654098510742
V
-1,0
BOT
0,8.39978333333333
V
0,8.93592834472656
V
-1,0
BOT
0,8.40645
V
0,8.82339477539063
V
-1,0
BOT
0,8.41311666666667
V
0,8.69846343994141
V
-1,0
BOT
0,8.41978333333333
V
0,8.56113433837891
V
-1,0
BOT
0,8.42645
V
0,8.41331481933594
V
-1,0
BOT
0,8.43311666666667
V
0,8.25834274291992
V
-1,0
BOT
0,8.43978333333333
V
0,8.10003280639648
V
-1,0
BOT
0,8.44645
V
0,7.94410705566406
V
-1,0
BOT
0,8.45311666666667
V
0,7.79485702514648
V
-1,0
BOT
0,8.45978333333333
V
0,7.65752792358398
V
-1,0
BOT
0,8.46645
V
0,7.53641128540039
V
-1,0
BOT
0,8.47311666666667
V
0,7.43532180786133
V
-1,0
BOT
0,8.47978333333333
V
0,7.35569000244141
V
-1,0
BOT
0,8.48645
V
0,7.29846954345703
V
-1,0
BOT
0,8.49311666666667
V
0,7.2627067565918
V
-1,0
BOT
0,8.49978333333333
V
0,7.24649429321289
V
-1,0
BOT
0,8.50645
V
0,7.24649429321289
V
-1,0
BOT
0,8.51311666666667
V
0,7.25936889648438
V
-1,0
BOT
0,8.51978333333333
V
0,7.28178024291992
V
-1,0
BOT
0,8.52645
V
0,7.31086730957031
V
-1,0
BOT
0,8.53311666666667
V
0,7.34281539916992
V
-1,0
BOT
0,8.53978333333333
V
0,7.37571716308594
V
-1,0
BOT
0,8.54645
V
0,7.40718841552734
V
-1,0
BOT
0,8.55311666666667
V
0,7.43627548217773
V
-1,0
BOT
0,8.55978333333333
V
0,7.46250152587891
V
-1,0
BOT
0,8.56645
V
0,7.48538970947266
V
-1,0
BOT
0,8.57311666666667
V
0,7.50589370727539
V
-1,0
BOT
0,8.57978333333333
V
0,7.52544403076172
V
-1,0
BOT
0,8.58645
V
0,7.54499435424805
V
-1,0
BOT
0,8.59311666666667
V
0,7.56502151489258
V
-1,0
BOT
0,8.59978333333333
V
0,7.58647918701172
V
-1,0
BOT
0,8.60645
V
0,7.61127471923828
V
-1,0
BOT
0,8.61311666666667
V
0,7.64036178588867
V
-1,0
BOT
0,8.61978333333333
V
0,7.67374038696289
V
-1,0
BOT
0,8.62645
V
0,7.71284103393555
V
-1,0
BOT
0,8.63311666666667
V
0,7.75814056396484
V
-1,0
BOT
0,8.63978333333333
V
0,7.81011581420898
V
-1,0
BOT
0,8.64645
V
0,7.86876678466797
V
-1,0
BOT
0,8.65311666666667
V
0,7.93361663818359
V
-1,0
BOT
0,8.65978333333333
V
0,8.00514221191406
V
-1,0
BOT
0,8.66645
V
0,8.08286666870117
V
-1,0
BOT
0,8.67311666666667
V
0,8.16583633422852
V
-1,0
BOT
0,8.67978333333333
V
0,8.25309753417969
V
-1,0
BOT
0,8.68645
V
0,8.34274291992188
V
-1,0
BOT
0,8.69311666666667
V
0,8.43286514282227
V
-1,0
BOT
0,8.69978333333333
V
0,8.52203369140625
V
-1,0
BOT
0,8.70645
V
0,8.60834121704102
V
-1,0
BOT
0,8.71311666666667
V
0,8.69083404541016
V
-1,0
BOT
0,8.71978333333333
V
0,8.76855850219727
V
-1,0
BOT
0,8.72645
V
0,8.84199142456055
V
-1,0
BOT
0,8.73311666666667
V
0,8.91208648681641
V
-1,0
BOT
0,8.73978333333333
V
0,8.98170471191406
V
-1,0
BOT
0,8.74645
V
0,9.05370712280273
V
-1,0
BOT
0,8.75311666666667
V
0,9.13190841674805
V
-1,0
BOT
0,8.75978333333333
V
0,9.22107696533203
V
-1,0
BOT
0,8.76645
V
0,9.32645797729492
V
-1,0
BOT
0,8.77311666666667
V
0,9.45281982421875
V
-1,0
BOT
0,8.77978333333333
V
0,9.60397720336914
V
-1,0
BOT
0,8.78645
V
0,9.78231430053711
V
-1,0
BOT
0,8.79311666666667
V
0,9.98926162719727
V
-1,0
BOT
0,8.79978333333333
V
0,10.223388671875
V
-1,0
BOT
0,8.80645
V
0,10.4823112487793
V
-1,0
BOT
0,8.81311666666667
V
0,10.7603073120117
V
-1,0
BOT
0,8.81978333333333
V
0,11.0507011413574
V
-1,0
BOT
0,8.82645
V
0,11.3449096679687
V
-1,0
BOT
0,8.83311666666667
V
0,11.6329193115234
V
-1,0
BOT
0,8.83978333333333
V
0,11.9032859802246
V
-1,0
BOT
0,8.84645
V
0,12.1440887451172
V
-1,0
BOT
0,8.85311666666667
V
0,12.3438835144043
V
-1,0
BOT
0,8.85978333333333
V
0,12.4931335449219
V
-1,0
BOT
0,8.86645
V
0,12.5823020935059
V
-1,0
BOT
0,8.87311666666667
V
0,12.606143951416
V
-1,0
BOT
0,8.87978333333333
V
0,12.5608444213867
V
-1,0
BOT
0,8.88645
V
0,12.4478340148926
V
-1,0
BOT
0,8.89311666666667
V
0,12.270450592041
V
-1,0
BOT
0,8.89978333333333
V
0,12.0363235473633
V
-1,0
BOT
0,8.90645
V
0,11.7554664611816
V
-1,0
BOT
0,8.91311666666667
V
0,11.4407539367676
V
-1,0
BOT
0,8.91978333333333
V
0,11.1050605773926
V
-1,0
BOT
0,8.92645
V
0,10.7626914978027
V
-1,0
BOT
0,8.93311666666667
V
0,10.4269981384277
V
-1,0
BOT
0,8.93978333333333
V
0,10.1099014282227
V
-1,0
BOT
0,8.94645
V
0,9.81998443603516
V
-1,0
BOT
0,8.95311666666667
V
0,9.56344604492188
V
-1,0
BOT
0,8.95978333333333
V
0,9.34600830078125
V
-1,0
BOT
0,8.96645
V
0,9.16814804077148
V
-1,0
BOT
0,8.97311666666667
V
0,9.02891159057617
V
-1,0
BOT
0,8.97978333333333
V
0,8.92496109008789
V
-1,0
BOT
0,8.98645
V
0,8.85391235351563
V
-1,0
BOT
0,8.99311666666667
V
0,8.81147384643555
V
-1,0
BOT
0,8.99978333333333
V
0,8.79526138305664
V
-1,0
BOT
0,9.00645
V
0,8.8038444519043
V
-1,0
BOT
0,9.01311666666667
V
0,8.83960723876953
V
-1,0
BOT
0,9.01978333333333
V
0,8.90684127807617
V
-1,0
BOT
0,9.02645
V
0,9.01508331298828
V
-1,0
BOT
0,9.03311666666667
V
0,9.17816162109375
V
-1,0
BOT
0,9.03978333333333
V
0,9.41610336303711
V
-1,0
BOT
0,9.04645
V
0,9.75561141967773
V
-1,0
BOT
0,9.05311666666667
V
0,10.2310180664062
V
-1,0
BOT
0,9.05978333333333
V
0,10.8861923217773
V
-1,0
BOT
0,9.06645
V
0,11.775016784668
V
-1,0
BOT
0,9.07311666666667
V
0,12.9599571228027
V
-1,0
BOT
0,9.07978333333333
V
0,14.5144462585449
V
-1,0
BOT
0,9.08645
V
0,16.5209770202637
V
-1,0
BOT
0,9.09311666666667
V
0,19.0696716308594
V
-1,0
BOT
0,9.09978333333333
V
0,22.2563743591309
V
-1,0
BOT
0,9.10645
V
0,26.176929473877
V
-1,0
BOT
0,9.11311666666667
V
0,30.9219360351562
V
-1,0
BOT
0,9.11978333333333
V
0,36.567211151123
V
-1,0
BOT
0,9.12645
V
0,43.1671142578125
V
-1,0
BOT
0,9.13311666666667
V
0,50.7473945617676
V
-1,0
BOT
0,9.13978333333333
V
0,59.295654296875
V
-1,0
BOT
0,9.14645
V
0,68.7508583068848
V
-1,0
BOT
0,9.15311666666667
V
0,78.9980888366699
V
-1,0
BOT
0,9.15978333333333
V
0,89.8652076721191
V
-1,0
BOT
0,9.16645
V
0,101.12190246582
V
-1,0
BOT
0,9.17311666666667
V
0,112.485885620117
V
-1,0
BOT
0,9.17978333333333
V
0,123.6252784729
V
-1,0
BOT
0,9.18645
V
0,134.176731109619
V
-1,0
BOT
0,9.19311666666667
V
0,143.759727478027
V
-1,0
BOT
0,9.19978333333333
V
0,152.001857757568
V
-1,0
BOT
0,9.20645
V
0,158.557891845703
V
-1,0
BOT
0,9.21311666666667
V
0,163.134574890137
V
-1,0
BOT
0,9.21978333333333
V
0,165.512561798096
V
-1,0
BOT
0,9.22645
V
0,165.566444396973
V
-1,0
BOT
0,9.23311666666667
V
0,163.277149200439
V
-1,0
BOT
0,9.23978333333333
V
0,158.732414245605
V
-1,0
BOT
0,9.24645
V
0,152.125835418701
V
-1,0
BOT
0,9.25311666666667
V
0,143.739700317383
V
-1,0
BOT
0,9.25978333333333
V
0,133.930683135986
V
-1,0
BOT
0,9.26645
V
0,123.100280761719
V
-1,0
BOT
0,9.27311666666667
V
0,111.671447753906
V
-1,0
BOT
0,9.27978333333333
V
0,100.053787231445
V
-1,0
BOT
0,9.28645
V
0,88.6235237121582
V
-1,0
BOT
0,9.29311666666667
V
0,77.7029991149902
V
-1,0
BOT
0,9.29978333333333
V
0,67.5487518310547
V
-1,0
BOT
0,9.30645
V
0,58.3429336547852
V
-1,0
BOT
0,9.31311666666667
V
0,50.1956939697266
V
-1,0
BOT
0,9.31978333333333
V
0,43.1532859802246
V
-1,0
BOT
0,9.32645
V
0,37.205696105957
V
-1,0
BOT
0,9.33311666666667
V
0,32.3004722595215
V
-1,0
BOT
0,9.33978333333333
V
0,28.350830078125
V
-1,0
BOT
0,9.34645
V
0,25.2513885498047
V
-1,0
BOT
0,9.35311666666667
V
0,22.8862762451172
V
-1,0
BOT
0,9.35978333333333
V
0,21.1405754089355
V
-1,0
BOT
0,9.36645
V
0,19.9036598205566
V
-1,0
BOT
0,9.37311666666667
V
0,19.0730094909668
V
-1,0
BOT
0,9.37978333333333
V
0,18.5580253601074
V
-1,0
BOT
0,9.38645
V
0,18.2781219482422
V
-1,0
BOT
0,9.39311666666667
V
0,18.1655883789062
V
-1,0
BOT
0,9.39978333333333
V
0,18.1622505187988
V
-1,0
BOT
0,9.40645
V
0,18.2199478149414
V
-1,0
BOT
0,9.41311666666667
V
0,18.2991027832031
V
-1,0
BOT
0,9.41978333333333
V
0,18.3687210083008
V
-1,0
BOT
0,9.42645
V
0,18.4049606323242
V
-1,0
BOT
0,9.43311666666667
V
0,18.3920860290527
V
-1,0
BOT
0,9.43978333333333
V
0,18.3200836181641
V
-1,0
BOT
0,9.44645
V
0,18.1851387023926
V
-1,0
BOT
0,9.45311666666667
V
0,17.9882049560547
V
-1,0
BOT
0,9.45978333333333
V
0,17.735481262207
V
-1,0
BOT
0,9.46645
V
0,17.4369812011719
V
-1,0
BOT
0,9.47311666666667
V
0,17.1055793762207
V
-1,0
BOT
0,9.47978333333333
V
0,16.7546272277832
V
-1,0
BOT
0,9.48645
V
0,16.3979530334473
V
-1,0
BOT
0,9.49311666666667
V
0,16.0493850708008
V
-1,0
BOT
0,9.49978333333333
V
0,15.7227516174316
V
-1,0
BOT
0,9.50645
V
0,15.4275894165039
V
-1,0
BOT
0,9.51311666666667
V
0,15.172004699707
V
-1,0
BOT
0,9.51978333333333
V
0,14.9598121643066
V
-1,0
BOT
0,9.52645
V
0,14.793872833252
V
-1,0
BOT
0,9.53311666666667
V
0,14.6737098693848
V
-1,0
BOT
0,9.53978333333333
V
0,14.5969390869141
V
-1,0
BOT
0,9.54645
V
0,14.5583152770996
V
-1,0
BOT
0,9.55311666666667
V
0,14.552116394043
V
-1,0
BOT
0,9.55978333333333
V
0,14.5711898803711
V
-1,0
BOT
0,9.56645
V
0,14.6064758300781
V
-1,0
BOT
0,9.57311666666667
V
0,14.6493911743164
V
-1,0
BOT
0,9.57978333333333
V
0,14.6918296813965
V
-1,0
BOT
0,9.58645
V
0,14.7242546081543
V
-1,0
BOT
0,9.59311666666667
V
0,14.7385597229004
V
-1,0
BOT
0,9.59978333333333
V
0,14.7280693054199
V
-1,0
BOT
0,9.60645
V
0,14.6865844726562
V
-1,0
BOT
0,9.61311666666667
V
0,14.610767364502
V
-1,0
BOT
0,9.61978333333333
V
0,14.4977569580078
V
-1,0
BOT
0,9.62645
V
0,14.3465995788574
V
-1,0
BOT
0,9.63311666666667
V
0,14.1606330871582
V
-1,0
BOT
0,9.63978333333333
V
0,13.9427185058594
V
-1,0
BOT
0,9.64645
V
0,13.697624206543
V
-1,0
BOT
0,9.65311666666667
V
0,13.4315490722656
V
-1,0
BOT
0,9.65978333333333
V
0,13.1525993347168
V
-1,0
BOT
0,9.66645
V
0,12.8684043884277
V
-1,0
BOT
0,9.67311666666667
V
0,12.5865936279297
V
-1,0
BOT
0,9.67978333333333
V
0,12.3152732849121
V
-1,0
BOT
0,9.68645
V
0,12.0630264282227
V
-1,0
BOT
0,9.69311666666667
V
0,11.8365287780762
V
-1,0
BOT
0,9.69978333333333
V
0,11.6438865661621
V
-1,0
BOT
0,9.70645
V
0,11.4893913269043
V
-1,0
BOT
0,9.71311666666667
V
0,11.3773345947266
V
-1,0
BOT
0,9.71978333333333
V
0,11.3115310668945
V
-1,0
BOT
0,9.72645
V
0,11.2924575805664
V
-1,0
BOT
0,9.73311666666667
V
0,11.319637298584
V
-1,0
BOT
0,9.73978333333333
V
0,11.3916397094727
V
-1,0
BOT
0,9.74645
V
0,11.505126953125
V
-1,0
BOT
0,9.75311666666667
V
0,11.6562843322754
V
-1,0
BOT
0,9.75978333333333
V
0,11.8398666381836
V
-1,0
BOT
0,9.76645
V
0,12.049674987793
V
-1,0
BOT
0,9.77311666666667
V
0,12.2780799865723
V
-1,0
BOT
0,9.77978333333333
V
0,12.5179290771484
V
-1,0
BOT
0,9.78645
V
0,12.7606391906738
V
-1,0
BOT
0,9.79311666666667
V
0,12.998104095459
V
-1,0
BOT
0,9.79978333333333
V
0,13.2231712341309
V
-1,0
BOT
0,9.80645
V
0,13.4286880493164
V
-1,0
BOT
0,9.81311666666667
V
0,13.608455657959
V
-1,0
BOT
0,9.81978333333333
V
0,13.7572288513184
V
-1,0
BOT
0,9.82645
V
0,13.8721466064453
V
-1,0
BOT
0,9.83311666666667
V
0,13.9508247375488
V
-1,0
BOT
0,9.83978333333333
V
0,13.9927864074707
V
-1,0
BOT
0,9.84645
V
0,14.0008926391602
V
-1,0
BOT
0,9.85311666666667
V
0,13.9780044555664
V
-1,0
BOT
0,9.85978333333333
V
0,13.9298439025879
V
-1,0
BOT
0,9.86645
V
0,13.8630867004395
V
-1,0
BOT
0,9.87311666666667
V
0,13.7844085693359
V
-1,0
BOT
0,9.87978333333333
V
0,13.7004852294922
V
-1,0
BOT
0,9.88645
V
0,13.6184692382812
V
-1,0
BOT
0,9.89311666666667
V
0,13.5459899902344
V
-1,0
BOT
0,9.89978333333333
V
0,13.4892463684082
V
-1,0
BOT
0,9.90645
V
0,13.4553909301758
V
-1,0
BOT
0,9.91311666666667
V
0,13.4525299072266
V
-1,0
BOT
0,9.91978333333333
V
0,13.4873390197754
V
-1,0
BOT
0,9.92645
V
0,13.5679244995117
V
-1,0
BOT
0,9.93311666666667
V
0,13.702392578125
V
-1,0
BOT
0,9.93978333333333
V
0,13.9012336730957
V
-1,0
BOT
0,9.94645
V
0,14.1735076904297
V
-1,0
BOT
0,9.95311666666667
V
0,14.5297050476074
V
-1,0
BOT
0,9.95978333333333
V
0,14.979362487793
V
-1,0
BOT
0,9.96645
V
0,15.5315399169922
V
-1,0
BOT
0,9.97311666666667
V
0,16.1929130554199
V
-1,0
BOT
0,9.97978333333333
V
0,16.9668197631836
V
-1,0
BOT
0,9.98645
V
0,17.8537368774414
V
-1,0
BOT
0,9.99311666666667
V
0,18.8474655151367
V
-1,0
BOT
0,9.99978333333333
V
0,19.9375152587891
V
-1,0
BOT
0,10.00645
V
0,21.1067199707031
V
-1,0
BOT
0,10.0131166666667
V
0,22.3331451416016
V
-1,0
BOT
0,10.0197833333333
V
0,23.587703704834
V
-1,0
BOT
0,10.02645
V
0,24.8346328735352
V
-1,0
BOT
0,10.0331166666667
V
0,26.036262512207
V
-1,0
BOT
0,10.0397833333333
V
0,27.1501541137695
V
-1,0
BOT
0,10.04645
V
0,28.1343460083008
V
-1,0
BOT
0,10.0531166666667
V
0,28.9492607116699
V
-1,0
BOT
0,10.0597833333333
V
0,29.5596122741699
V
-1,0
BOT
0,10.06645
V
0,29.9358367919922
V
-1,0
BOT
0,10.0731166666667
V
0,30.0602912902832
V
-1,0
BOT
0,10.0797833333333
V
0,29.9243927001953
V
-1,0
BOT
0,10.08645
V
0,29.5314788818359
V
-1,0
BOT
0,10.0931166666667
V
0,28.8968086242676
V
-1,0
BOT
0,10.0997833333333
V
0,28.045654296875
V
-1,0
BOT
0,10.10645
V
0,27.0133018493652
V
-1,0
BOT
0,10.1131166666667
V
0,25.8402824401855
V
-1,0
BOT
0,10.1197833333333
V
0,24.5733261108398
V
-1,0
BOT
0,10.12645
V
0,23.2577323913574
V
-1,0
BOT
0,10.1331166666667
V
0,21.9392776489258
V
-1,0
BOT
0,10.1397833333333
V
0,20.6584930419922
V
-1,0
BOT
0,10.14645
V
0,19.4497108459473
V
-1,0
BOT
0,10.1531166666667
V
0,18.3405876159668
V
-1,0
BOT
0,10.1597833333333
V
0,17.3501968383789
V
-1,0
BOT
0,10.16645
V
0,16.4914131164551
V
-1,0
BOT
0,10.1731166666667
V
0,15.7709121704102
V
-1,0
BOT
0,10.1797833333333
V
0,15.1901245117187
V
-1,0
BOT
0,10.18645
V
0,14.7466659545898
V
-1,0
BOT
0,10.1931166666667
V
0,14.4367218017578
V
-1,0
BOT
0,10.1997833333333
V
0,14.2550468444824
V
-1,0
BOT
0,10.20645
V
0,14.1959190368652
V
-1,0
BOT
0,10.2131166666667
V
0,14.254093170166
V
-1,0
BOT
0,10.2197833333333
V
0,14.4267082214355
V
-1,0
BOT
0,10.22645
V
0,14.7132873535156
V
-1,0
BOT
0,10.2331166666667
V
0,15.1138305664062
V
-1,0
BOT
0,10.2397833333333
V
0,15.629768371582
V
-1,0
BOT
0,10.24645
V
0,16.265869140625
V
-1,0
BOT
0,10.2531166666667
V
0,17.0259475708008
V
-1,0
BOT
0,10.2597833333333
V
0,17.9147720336914
V
-1,0
BOT
0,10.26645
V
0,18.9361572265625
V
-1,0
BOT
0,10.2731166666667
V
0,20.0929641723633
V
-1,0
BOT
0,10.2797833333333
V
0,21.388053894043
V
-1,0
BOT
0,10.28645
V
0,22.8195190429687
V
-1,0
BOT
0,10.2931166666667
V
0,24.3825912475586
V
-1,0
BOT
0,10.2997833333333
V
0,26.0672569274902
V
-1,0
BOT
0,10.30645
V
0,27.8596878051758
V
-1,0
BOT
0,10.3131166666667
V
0,29.7393798828125
V
-1,0
BOT
0,10.3197833333333
V
0,31.6801071166992
V
-1,0
BOT
0,10.32645
V
0,33.6484909057617
V
-1,0
BOT
0,10.3331166666667
V
0,35.6078147888184
V
-1,0
BOT
0,10.3397833333333
V
0,37.5142097473145
V
-1,0
BOT
0,10.34645
V
0,39.3223762512207
V
-1,0
BOT
0,10.3531166666667
V
0,40.9832000732422
V
-1,0
BOT
0,10.3597833333333
V
0,42.4494743347168
V
-1,0
BOT
0,10.36645
V
0,43.6758995056152
V
-1,0
BOT
0,10.3731166666667
V
0,44.6224212646484
V
-1,0
BOT
0,10.3797833333333
V
0,45.2566146850586
V
-1,0
BOT
0,10.38645
V
0,45.5565452575684
V
-1,0
BOT
0,10.3931166666667
V
0,45.5131530761719
V
-1,0
BOT
0,10.3997833333333
V
0,45.1297760009766
V
-1,0
BOT
0,10.40645
V
0,44.4240570068359
V
-1,0
BOT
0,10.4131166666667
V
0,43.4274673461914
V
-1,0
BOT
0,10.4197833333333
V
0,42.1810150146484
V
-1,0
BOT
0,10.42645
V
0,40.7381057739258
V
-1,0
BOT
0,10.4331166666667
V
0,39.156436920166
V
-1,0
BOT
0,10.4397833333333
V
0,37.4979972839355
V
-1,0
BOT
0,10.44645
V
0,35.8238220214844
V
-1,0
BOT
0,10.4531166666667
V
0,34.1920852661133
V
-1,0
BOT
0,10.4597833333333
V
0,32.6557159423828
V
-1,0
BOT
0,10.46645
V
0,31.257152557373
V
-1,0
BOT
0,10.4731166666667
V
0,30.0307273864746
V
-1,0
BOT
0,10.4797833333333
V
0,28.998851776123
V
-1,0
BOT
0,10.48645
V
0,28.1739234924316
V
-1,0
BOT
0,10.4931166666667
V
0,27.5592803955078
V
-1,0
BOT
0,10.4997833333333
V
0,27.1472930908203
V
-1,0
BOT
0,10.50645
V
0,26.923656463623
V
-1,0
BOT
0,10.5131166666667
V
0,26.8669128417969
V
-1,0
BOT
0,10.5197833333333
V
0,26.949405670166
V
-1,0
BOT
0,10.52645
V
0,27.1391868591309
V
-1,0
BOT
0,10.5331166666667
V
0,27.4009704589844
V
-1,0
BOT
0,10.5397833333333
V
0,27.6989936828613
V
-1,0
BOT
0,10.54645
V
0,27.9955863952637
V
-1,0
BOT
0,10.5531166666667
V
0,28.254508972168
V
-1,0
BOT
0,10.5597833333333
V
0,28.4423828125
V
-1,0
BOT
0,10.56645
V
0,28.5282135009766
V
-1,0
BOT
0,10.5731166666667
V
0,28.4881591796875
V
-1,0
BOT
0,10.5797833333333
V
0,28.3026695251465
V
-1,0
BOT
0,10.58645
V
0,27.9598236083984
V
-1,0
BOT
0,10.5931166666667
V
0,27.4558067321777
V
-1,0
BOT
0,10.5997833333333
V
0,26.7949104309082
V
-1,0
BOT
0,10.60645
V
0,25.9876251220703
V
-1,0
BOT
0,10.6131166666667
V
0,25.0506401062012
V
-1,0
BOT
0,10.6197833333333
V
0,24.0077972412109
V
-1,0
BOT
0,10.62645
V
0,22.885799407959
V
-1,0
BOT
0,10.6331166666667
V
0,21.7132568359375
V
-1,0
BOT
0,10.6397833333333
V
0,20.5192565917969
V
-1,0
BOT
0,10.64645
V
0,19.3328857421875
V
-1,0
BOT
0,10.6531166666667
V
0,18.1789398193359
V
-1,0
BOT
0,10.6597833333333
V
0,17.0793533325195
V
-1,0
BOT
0,10.66645
V
0,16.0508155822754
V
-1,0
BOT
0,10.6731166666667
V
0,15.1042938232422
V
-1,0
BOT
0,10.6797833333333
V
0,14.246940612793
V
-1,0
BOT
0,10.68645
V
0,13.4806632995605
V
-1,0
BOT
0,10.6931166666667
V
0,12.8059387207031
V
-1,0
BOT
0,10.6997833333333
V
0,12.2184753417969
V
-1,0
BOT
0,10.70645
V
0,11.7125511169434
V
-1,0
BOT
0,10.7131166666667
V
0,11.2814903259277
V
-1,0
BOT
0,10.7197833333333
V
0,10.9176635742187
V
-1,0
BOT
0,10.72645
V
0,10.6139183044434
V
-1,0
BOT
0,10.7331166666667
V
0,10.3626251220703
V
-1,0
BOT
0,10.7397833333333
V
0,10.157585144043
V
-1,0
BOT
0,10.74645
V
0,9.99355316162109
V
-1,0
BOT
0,10.7531166666667
V
0,9.86576080322266
V
-1,0
BOT
0,10.7597833333333
V
0,9.77087020874023
V
-1,0
BOT
0,10.76645
V
0,9.70649719238281
V
-1,0
BOT
0,10.7731166666667
V
0,9.67025756835938
V
-1,0
BOT
0,10.7797833333333
V
0,9.66024398803711
V
-1,0
BOT
0,10.78645
V
0,9.6745491027832
V
-1,0
BOT
0,10.7931166666667
V
0,9.71031188964844
V
-1,0
BOT
0,10.7997833333333
V
0,9.76657867431641
V
-1,0
BOT
0,10.80645
V
0,9.84001159667969
V
-1,0
BOT
0,10.8131166666667
V
0,9.92822647094727
V
-1,0
BOT
0,10.8197833333333
V
0,10.0288391113281
V
-1,0
BOT
0,10.82645
V
0,10.1394653320312
V
-1,0
BOT
0,10.8331166666667
V
0,10.2577209472656
V
-1,0
BOT
0,10.8397833333333
V
0,10.3797912597656
V
-1,0
BOT
0,10.84645
V
0,10.5042457580566
V
-1,0
BOT
0,10.8531166666667
V
0,10.6287002563477
V
-1,0
BOT
0,10.8597833333333
V
0,10.7517242431641
V
-1,0
BOT
0,10.86645
V
0,10.8709335327148
V
-1,0
BOT
0,10.8731166666667
V
0,10.9858512878418
V
-1,0
BOT
0,10.8797833333333
V
0,11.0955238342285
V
-1,0
BOT
0,10.88645
V
0,11.2004280090332
V
-1,0
BOT
0,10.8931166666667
V
0,11.2996101379395
V
-1,0
BOT
0,10.8997833333333
V
0,11.3930702209473
V
-1,0
BOT
0,10.90645
V
0,11.4808082580566
V
-1,0
BOT
0,10.9131166666667
V
0,11.5628242492676
V
-1,0
BOT
0,10.9197833333333
V
0,11.6400718688965
V
-1,0
BOT
0,10.92645
V
0,11.7106437683105
V
-1,0
BOT
0,10.9331166666667
V
0,11.7754936218262
V
-1,0
BOT
0,10.9397833333333
V
0,11.8350982666016
V
-1,0
BOT
0,10.94645
V
0,11.8889808654785
V
-1,0
BOT
0,10.9531166666667
V
0,11.9380950927734
V
-1,0
BOT
0,10.9597833333333
V
0,11.9833946228027
V
-1,0
BOT
0,10.96645
V
0,12.0277404785156
V
-1,0
BOT
0,10.9731166666667
V
0,12.0730400085449
V
-1,0
BOT
0,10.9797833333333
V
0,12.1235847473145
V
-1,0
BOT
0,10.98645
V
0,12.1831893920898
V
-1,0
BOT
0,10.9931166666667
V
0,12.2570991516113
V
-1,0
BOT
0,10.9997833333333
V
0,12.3510360717773
V
-1,0
BOT
0,11.00645
V
0,12.4711990356445
V
-1,0
BOT
0,11.0131166666667
V
0,12.6242637634277
V
-1,0
BOT
0,11.0197833333333
V
0,12.8164291381836
V
-1,0
BOT
0,11.02645
V
0,13.0534172058105
V
-1,0
BOT
0,11.0331166666667
V
0,13.338565826416
V
-1,0
BOT
0,11.0397833333333
V
0,13.6747360229492
V
-1,0
BOT
0,11.04645
V
0,14.0609741210937
V
-1,0
BOT
0,11.0531166666667
V
0,14.4953727722168
V
-1,0
BOT
0,11.0597833333333
V
0,14.9726867675781
V
-1,0
BOT
0,11.06645
V
0,15.4852867126465
V
-1,0
BOT
0,11.0731166666667
V
0,16.0231590270996
V
-1,0
BOT
0,11.0797833333333
V
0,16.5743827819824
V
-1,0
BOT
0,11.08645
V
0,17.1265602111816
V
-1,0
BOT
0,11.0931166666667
V
0,17.6658630371094
V
-1,0
BOT
0,11.0997833333333
V
0,18.1775093078613
V
-1,0
BOT
0,11.10645
V
0,18.651008605957
V
-1,0
BOT
0,11.1131166666667
V
0,19.0768241882324
V
-1,0
BOT
0,11.1197833333333
V
0,19.4492340087891
V
-1,0
BOT
0,11.12645
V
0,19.7677612304687
V
-1,0
BOT
0,11.1331166666667
V
0,20.0362205505371
V
-1,0
BOT
0,11.1397833333333
V
0,20.2641487121582
V
-1,0
BOT
0,11.14645
V
0,20.4658508300781
V
-1,0
BOT
0,11.1531166666667
V
0,20.6599235534668
V
-1,0
BOT
0,11.1597833333333
V
0,20.866870880127
V
-1,0
BOT
0,11.16645
V
0,21.1095809936523
V
-1,0
BOT
0,11.1731166666667
V
0,21.4095115661621
V
-1,0
BOT
0,11.1797833333333
V
0,21.7866897583008
V
-1,0
BOT
0,11.18645
V
0,22.2549438476562
V
-1,0
BOT
0,11.1931166666667
V
0,22.8195190429687
V
-1,0
BOT
0,11.1997833333333
V
0,23.4789848327637
V
-1,0
BOT
0,11.20645
V
0,24.2209434509277
V
-1,0
BOT
0,11.2131166666667
V
0,25.0229835510254
V
-1,0
BOT
0,11.2197833333333
V
0,25.8517265319824
V
-1,0
BOT
0,11.22645
V
0,26.667594909668
V
-1,0
BOT
0,11.2331166666667
V
0,27.4252891540527
V
-1,0
BOT
0,11.2397833333333
V
0,28.0771255493164
V
-1,0
BOT
0,11.24645
V
0,28.5763740539551
V
-1,0
BOT
0,11.2531166666667
V
0,28.8801193237305
V
-1,0
BOT
0,11.2597833333333
V
0,28.9559364318848
V
-1,0
BOT
0,11.26645
V
0,28.7814140319824
V
-1,0
BOT
0,11.2731166666667
V
0,28.3470153808594
V
-1,0
BOT
0,11.2797833333333
V
0,27.6584625244141
V
-1,0
BOT
0,11.28645
V
0,26.7362594604492
V
-1,0
BOT
0,11.2931166666667
V
0,25.6123542785645
V
-1,0
BOT
0,11.2997833333333
V
0,24.329662322998
V
-1,0
BOT
0,11.30645
V
0,22.9363441467285
V
-1,0
BOT
0,11.3131166666667
V
0,21.4838981628418
V
-1,0
BOT
0,11.3197833333333
V
0,20.0223922729492
V
-1,0
BOT
0,11.32645
V
0,18.5966491699219
V
-1,0
BOT
0,11.3331166666667
V
0,17.244815826416
V
-1,0
BOT
0,11.3397833333333
V
0,15.9969329833984
V
-1,0
BOT
0,11.34645
V
0,14.8725509643555
V
-1,0
BOT
0,11.3531166666667
V
0,13.8840675354004
V
-1,0
BOT
0,11.3597833333333
V
0,13.0329132080078
V
-1,0
BOT
0,11.36645
V
0,12.3171806335449
V
-1,0
BOT
0,11.3731166666667
V
0,11.7263793945312
V
-1,0
BOT
0,11.3797833333333
V
0,11.2490653991699
V
-1,0
BOT
0,11.38645
V
0,10.8699798583984
V
-1,0
BOT
0,11.3931166666667
V
0,10.5752944946289
V
-1,0
BOT
0,11.3997833333333
V
0,10.3507041931152
V
-1,0
BOT
0,11.40645
V
0,10.1833343505859
V
-1,0
BOT
0,11.4131166666667
V
0,10.0612640380859
V
-1,0
BOT
0,11.4197833333333
V
0,9.97591018676758
V
-1,0
BOT
0,11.42645
V
0,9.918212890625
V
-1,0
BOT
0,11.4331166666667
V
0,9.88245010375977
V
-1,0
BOT
0,11.4397833333333
V
0,9.86337661743164
V
-1,0
BOT
0,11.44645
V
0,9.8576545715332
V
-1,0
BOT
0,11.4531166666667
V
0,9.86242294311523
V
-1,0
BOT
0,11.4597833333333
V
0,9.87577438354492
V
-1,0
BOT
0,11.46645
V
0,9.89675521850586
V
-1,0
BOT
0,11.4731166666667
V
0,9.92298126220703
V
-1,0
BOT
0,11.4797833333333
V
0,9.95397567749023
V
-1,0
BOT
0,11.48645
V
0,9.98783111572266
V
-1,0
BOT
0,11.4931166666667
V
0,10.0240707397461
V
-1,0
BOT
0,11.4997833333333
V
0,10.0617408752441
V
-1,0
BOT
0,11.50645
V
0,10.0994110107422
V
-1,0
BOT
0,11.5131166666667
V
0,10.136604309082
V
-1,0
BOT
0,11.5197833333333
V
0,10.1723670959473
V
-1,0
BOT
0,11.52645
V
0,10.2071762084961
V
-1,0
BOT
0,11.5331166666667
V
0,10.2400779724121
V
-1,0
BOT
0,11.5397833333333
V
0,10.2715492248535
V
-1,0
BOT
0,11.54645
V
0,10.3011131286621
V
-1,0
BOT
0,11.5531166666667
V
0,10.3306770324707
V
-1,0
BOT
0,11.5597833333333
V
0,10.3616714477539
V
-1,0
BOT
0,11.56645
V
0,10.3960037231445
V
-1,0
BOT
0,11.5731166666667
V
0,10.4365348815918
V
-1,0
BOT
0,11.5797833333333
V
0,10.4866027832031
V
-1,0
BOT
0,11.58645
V
0,10.5514526367187
V
-1,0
BOT
0,11.5931166666667
V
0,10.6377601623535
V
-1,0
BOT
0,11.5997833333333
V
0,10.7526779174805
V
-1,0
BOT
0,11.60645
V
0,10.9071731567383
V
-1,0
BOT
0,11.6131166666667
V
0,11.1117362976074
V
-1,0
BOT
0,11.6197833333333
V
0,11.380672454834
V
-1,0
BOT
0,11.62645
V
0,11.7306709289551
V
-1,0
BOT
0,11.6331166666667
V
0,12.1817588806152
V
-1,0
BOT
0,11.6397833333333
V
0,12.7558708190918
V
-1,0
BOT
0,11.64645
V
0,13.4778022766113
V
-1,0
BOT
0,11.6531166666667
V
0,14.3733024597168
V
-1,0
BOT
0,11.6597833333333
V
0,15.470027923584
V
-1,0
BOT
0,11.66645
V
0,16.7946815490723
V
-1,0
BOT
0,11.6731166666667
V
0,18.3725357055664
V
-1,0
BOT
0,11.6797833333333
V
0,20.2240943908691
V
-1,0
BOT
0,11.68645
V
0,22.364616394043
V
-1,0
BOT
0,11.6931166666667
V
0,24.8022079467773
V
-1,0
BOT
0,11.6997833333333
V
0,27.5368690490723
V
-1,0
BOT
0,11.70645
V
0,30.5562019348145
V
-1,0
BOT
0,11.7131166666667
V
0,33.836841583252
V
-1,0
BOT
0,11.7197833333333
V
0,37.3406410217285
V
-1,0
BOT
0,11.72645
V
0,41.0165786743164
V
-1,0
BOT
0,11.7331166666667
V
0,44.8017120361328
V
-1,0
BOT
0,11.7397833333333
V
0,48.6207008361816
V
-1,0
BOT
0,11.74645
V
0,52.3896217346191
V
-1,0
BOT
0,11.7531166666667
V
0,56.0173988342285
V
-1,0
BOT
0,11.7597833333333
V
0,59.4100952148438
V
-1,0
BOT
0,11.76645
V
0,62.4780654907227
V
-1,0
BOT
0,11.7731166666667
V
0,65.1350021362305
V
-1,0
BOT
0,11.7797833333333
V
0,67.3055648803711
V
-1,0
BOT
0,11.78645
V
0,68.9291954040527
V
-1,0
BOT
0,11.7931166666667
V
0,69.9620246887207
V
-1,0
BOT
0,11.7997833333333
V
0,70.3825950622559
V
-1,0
BOT
0,11.80645
V
0,70.1889991760254
V
-1,0
BOT
0,11.8131166666667
V
0,69.4007873535156
V
-1,0
BOT
0,11.8197833333333
V
0,68.0580139160156
V
-1,0
BOT
0,11.82645
V
0,66.2178993225098
V
-1,0
BOT
0,11.8331166666667
V
0,63.9524459838867
V
-1,0
BOT
0,11.8397833333333
V
0,61.3422393798828
V
-1,0
BOT
0,11.84645
V
0,58.4735870361328
V
-1,0
BOT
0,11.8531166666667
V
0,55.4327964782715
V
-1,0
BOT
0,11.8597833333333
V
0,52.3028373718262
V
-1,0
BOT
0,11.86645
V
0,49.1623878479004
V
-1,0
BOT
0,11.8731166666667
V
0,46.0805892944336
V
-1,0
BOT
0,11.8797833333333
V
0,43.1151390075684
V
-1,0
BOT
0,11.88645
V
0,40.3122901916504
V
-1,0
BOT
0,11.8931166666667
V
0,37.7068519592285
V
-1,0
BOT
0,11.8997833333333
V
0,35.3212356567383
V
-1,0
BOT
0,11.90645
V
0,33.1668853759766
V
-1,0
BOT
0,11.9131166666667
V
0,31.2442779541016
V
-1,0
BOT
0,11.9197833333333
V
0,29.548168182373
V
-1,0
BOT
0,11.92645
V
0,28.0652046203613
V
-1,0
BOT
0,11.9331166666667
V
0,26.7796516418457
V
-1,0
BOT
0,11.9397833333333
V
0,25.6705284118652
V
-1,0
BOT
0,11.94645
V
0,24.7159004211426
V
-1,0
BOT
0,11.9531166666667
V
0,23.892879486084
V
-1,0
BOT
0,11.9597833333333
V
0,23.1795310974121
V
-1,0
BOT
0,11.96645
V
0,22.5543975830078
V
-1,0
BOT
0,11.9731166666667
V
0,21.9979286193848
V
-1,0
BOT
0,11.9797833333333
V
0,21.491527557373
V
-1,0
BOT
0,11.98645
V
0,21.0199356079102
V
-1,0
BOT
0,11.9931166666667
V
0,20.5698013305664
V
-1,0
BOT
0,11.9997833333333
V
0,20.1301574707031
V
-1,0
BOT
0,12.00645
V
0,19.6933746337891
V
-1,0
BOT
0,12.0131166666667
V
0,19.254207611084
V
-1,0
BOT
0,12.0197833333333
V
0,18.8107490539551
V
-1,0
BOT
0,12.02645
V
0,18.3653831481934
V
-1,0
BOT
0,12.0331166666667
V
0,17.9238319396973
V
-1,0
BOT
0,12.0397833333333
V
0,17.4961090087891
V
-1,0
BOT
0,12.04645
V
0,17.0960426330566
V
-1,0
BOT
0,12.0531166666667
V
0,16.7422294616699
V
-1,0
BOT
0,12.0597833333333
V
0,16.4551734924316
V
-1,0
BOT
0,12.06645
V
0,16.2596702575684
V
-1,0
BOT
0,12.0731166666667
V
0,16.1828994750977
V
-1,0
BOT
0,12.0797833333333
V
0,16.2549018859863
V
-1,0
BOT
0,12.08645
V
0,16.5066719055176
V
-1,0
BOT
0,12.0931166666667
V
0,16.9692039489746
V
-1,0
BOT
0,12.0997833333333
V
0,17.6711082458496
V
-1,0
BOT
0,12.10645
V
0,18.639087677002
V
-1,0
BOT
0,12.1131166666667
V
0,19.8907852172852
V
-1,0
BOT
0,12.1197833333333
V
0,21.4352607727051
V
-1,0
BOT
0,12.12645
V
0,23.2682228088379
V
-1,0
BOT
0,12.1331166666667
V
0,25.3729820251465
V
-1,0
BOT
0,12.1397833333333
V
0,27.7152061462402
V
-1,0
BOT
0,12.14645
V
0,30.2448272705078
V
-1,0
BOT
0,12.1531166666667
V
0,32.8927040100098
V
-1,0
BOT
0,12.1597833333333
V
0,35.5758666992187
V
-1,0
BOT
0,12.16645
V
0,38.1989479064941
V
-1,0
BOT
0,12.1731166666667
V
0,40.6603813171387
V
-1,0
BOT
0,12.1797833333333
V
0,42.8552627563477
V
-1,0
BOT
0,12.18645
V
0,44.6848869323731
V
-1,0
BOT
0,12.1931166666667
V
0,46.0619926452637
V
-1,0
BOT
0,12.1997833333333
V
0,46.9174385070801
V
-1,0
BOT
0,12.20645
V
0,47.2068786621094
V
-1,0
BOT
0,12.2131166666667
V
0,46.9126701354981
V
-1,0
BOT
0,12.2197833333333
V
0,46.046257019043
V
-1,0
BOT
0,12.22645
V
0,44.6481704711914
V
-1,0
BOT
0,12.2331166666667
V
0,42.7842140197754
V
-1,0
BOT
0,12.2397833333333
V
0,40.5411720275879
V
-1,0
BOT
0,12.24645
V
0,38.017749786377
V
-1,0
BOT
0,12.2531166666667
V
0,35.3193283081055
V
-1,0
BOT
0,12.2597833333333
V
0,32.5489044189453
V
-1,0
BOT
0,12.26645
V
0,29.8018455505371
V
-1,0
BOT
0,12.2731166666667
V
0,27.1611213684082
V
-1,0
BOT
0,12.2797833333333
V
0,24.6915817260742
V
-1,0
BOT
0,12.28645
V
0,22.4404335021973
V
-1,0
BOT
0,12.2931166666667
V
0,20.4377174377441
V
-1,0
BOT
0,12.2997833333333
V
0,18.6963081359863
V
-1,0
BOT
0,12.30645
V
0,17.2162055969238
V
-1,0
BOT
0,12.3131166666667
V
0,15.9845352172852
V
-1,0
BOT
0,12.3197833333333
V
0,14.9822235107422
V
-1,0
BOT
0,12.32645
V
0,14.1849517822266
V
-1,0
BOT
0,12.3331166666667
V
0,13.5674476623535
V
-1,0
BOT
0,12.3397833333333
V
0,13.1034851074219
V
-1,0
BOT
0,12.34645
V
0,12.7677917480469
V
-1,0
BOT
0,12.3531166666667
V
0,12.5384330749512
V
-1,0
BOT
0,12.3597833333333
V
0,12.3958587646484
V
-1,0
BOT
0,12.36645
V
0,12.3238563537598
V
-1,0
BOT
0,12.3731166666667
V
0,12.3071670532227
V
-1,0
BOT
0,12.3797833333333
V
0,12.3357772827148
V
-1,0
BOT
0,12.38645
V
0,12.4006271362305
V
-1,0
BOT
0,12.3931166666667
V
0,12.4945640563965
V
-1,0
BOT
0,12.3997833333333
V
0,12.6128196716309
V
-1,0
BOT
0,12.40645
V
0,12.7501487731934
V
-1,0
BOT
0,12.4131166666667
V
0,12.9027366638184
V
-1,0
BOT
0,12.4197833333333
V
0,13.066291809082
V
-1,0
BOT
0,12.42645
V
0,13.2369995117187
V
-1,0
BOT
0,12.4331166666667
V
0,13.4119987487793
V
-1,0
BOT
0,12.4397833333333
V
0,13.587474822998
V
-1,0
BOT
0,12.44645
V
0,13.7605667114258
V
-1,0
BOT
0,12.4531166666667
V
0,13.9269828796387
V
-1,0
BOT
0,12.4597833333333
V
0,14.0848159790039
V
-1,0
BOT
0,12.46645
V
0,14.2321586608887
V
-1,0
BOT
0,12.4731166666667
V
0,14.366626739502
V
-1,0
BOT
0,12.4797833333333
V
0,14.4867897033691
V
-1,0
BOT
0,12.48645
V
0,14.5926475524902
V
-1,0
BOT
0,12.4931166666667
V
0,14.6856307983398
V
-1,0
BOT
0,12.4997833333333
V
0,14.7666931152344
V
-1,0
BOT
0,12.50645
V
0,14.8391723632812
V
-1,0
BOT
0,12.5131166666667
V
0,14.9044990539551
V
-1,0
BOT
0,12.5197833333333
V
0,14.9660110473633
V
-1,0
BOT
0,12.52645
V
0,15.0284767150879
V
-1,0
BOT
0,12.5331166666667
V
0,15.0952339172363
V
-1,0
BOT
0,12.5397833333333
V
0,15.1686668395996
V
-1,0
BOT
0,12.54645
V
0,15.2521133422852
V
-1,0
BOT
0,12.5531166666667
V
0,15.3465270996094
V
-1,0
BOT
0,12.5597833333333
V
0,15.4528617858887
V
-1,0
BOT
0,12.56645
V
0,15.5701637268066
V
-1,0
BOT
0,12.5731166666667
V
0,15.6974792480469
V
-1,0
BOT
0,12.5797833333333
V
0,15.831470489502
V
-1,0
BOT
0,12.58645
V
0,15.9683227539062
V
-1,0
BOT
0,12.5931166666667
V
0,16.1051750183105
V
-1,0
BOT
0,12.5997833333333
V
0,16.2367820739746
V
-1,0
BOT
0,12.60645
V
0,16.3578987121582
V
-1,0
BOT
0,12.6131166666667
V
0,16.4637565612793
V
-1,0
BOT
0,12.6197833333333
V
0,16.5491104125977
V
-1,0
BOT
0,12.62645
V
0,16.6106224060059
V
-1,0
BOT
0,12.6331166666667
V
0,16.6435241699219
V
-1,0
BOT
0,12.6397833333333
V
0,16.6459083557129
V
-1,0
BOT
0,12.64645
V
0,16.6168212890625
V
-1,0
BOT
0,12.6531166666667
V
0,16.5562629699707
V
-1,0
BOT
0,12.6597833333333
V
0,16.4647102355957
V
-1,0
BOT
0,12.66645
V
0,16.3435935974121
V
-1,0
BOT
0,12.6731166666667
V
0,16.1957740783691
V
-1,0
BOT
0,12.6797833333333
V
0,16.0255432128906
V
-1,0
BOT
0,12.68645
V
0,15.8371925354004
V
-1,0
BOT
0,12.6931166666667
V
0,15.6350135803223
V
-1,0
BOT
0,12.6997833333333
V
0,15.4252052307129
V
-1,0
BOT
0,12.70645
V
0,15.2120590209961
V
-1,0
BOT
0,12.7131166666667
V
0,15.0022506713867
V
-1,0
BOT
0,12.7197833333333
V
0,14.7995948791504
V
-1,0
BOT
0,12.72645
V
0,14.6074295043945
V
-1,0
BOT
0,12.7331166666667
V
0,14.4295692443848
V
-1,0
BOT
0,12.7397833333333
V
0,14.2688751220703
V
-1,0
BOT
0,12.74645
V
0,14.1282081604004
V
-1,0
BOT
0,12.7531166666667
V
0,14.0089988708496
V
-1,0
BOT
0,12.7597833333333
V
0,13.911247253418
V
-1,0
BOT
0,12.76645
V
0,13.8363838195801
V
-1,0
BOT
0,12.7731166666667
V
0,13.7848854064941
V
-1,0
BOT
0,12.7797833333333
V
0,13.7567520141602
V
-1,0
BOT
0,12.78645
V
0,13.7519836425781
V
-1,0
BOT
0,12.7931166666667
V
0,13.7710571289062
V
-1,0
BOT
0,12.7997833333333
V
0,13.8158798217773
V
-1,0
BOT
0,12.80645
V
0,13.8869285583496
V
-1,0
BOT
0,12.8131166666667
V
0,13.9851570129395
V
-1,0
BOT
0,12.8197833333333
V
0,14.1134262084961
V
-1,0
BOT
0,12.82645
V
0,14.2736434936523
V
-1,0
BOT
0,12.8331166666667
V
0,14.4672393798828
V
-1,0
BOT
0,12.8397833333333
V
0,14.6970748901367
V
-1,0
BOT
0,12.84645
V
0,14.9650573730469
V
-1,0
BOT
0,12.8531166666667
V
0,15.2735710144043
V
-1,0
BOT
0,12.8597833333333
V
0,15.6240463256836
V
-1,0
BOT
0,12.86645
V
0,16.0164833068848
V
-1,0
BOT
0,12.8731166666667
V
0,16.4508819580078
V
-1,0
BOT
0,12.8797833333333
V
0,16.9277191162109
V
-1,0
BOT
0,12.88645
V
0,17.4446105957031
V
-1,0
BOT
0,12.8931166666667
V
0,17.9986953735352
V
-1,0
BOT
0,12.8997833333333
V
0,18.585205078125
V
-1,0
BOT
0,12.90645
V
0,19.1969871520996
V
-1,0
BOT
0,12.9131166666667
V
0,19.8278427124023
V
-1,0
BOT
0,12.9197833333333
V
0,20.4682350158691
V
-1,0
BOT
0,12.92645
V
0,21.1086273193359
V
-1,0
BOT
0,12.9331166666667
V
0,21.7390060424805
V
-1,0
BOT
0,12.9397833333333
V
0,22.3493576049805
V
-1,0
BOT
0,12.94645
V
0,22.9301452636719
V
-1,0
BOT
0,12.9531166666667
V
0,23.4723091125488
V
-1,0
BOT
0,12.9597833333333
V
0,23.9672660827637
V
-1,0
BOT
0,12.96645
V
0,24.4083404541016
V
-1,0
BOT
0,12.9731166666667
V
0,24.7926712036133
V
-1,0
BOT
0,12.9797833333333
V
0,25.1169204711914
V
-1,0
BOT
0,12.98645
V
0,25.3810882568359
V
-1,0
BOT
0,12.9931166666667
V
0,25.5866050720215
V
-1,0
BOT
0,12.9997833333333
V
0,25.7377624511719
V
-1,0
BOT
0,13.00645
V
0,25.8388519287109
V
-1,0
BOT
0,13.0131166666667
V
0,25.8946418762207
V
-1,0
BOT
0,13.0197833333333
V
0,25.9113311767578
V
-1,0
BOT
0,13.02645
V
0,25.8932113647461
V
-1,0
BOT
0,13.0331166666667
V
0,25.8464813232422
V
-1,0
BOT
0,13.0397833333333
V
0,25.7744789123535
V
-1,0
BOT
0,13.04645
V
0,25.6814956665039
V
-1,0
BOT
0,13.0531166666667
V
0,25.5718231201172
V
-1,0
BOT
0,13.0597833333333
V
0,25.4497528076172
V
-1,0
BOT
0,13.06645
V
0,25.3210067749023
V
-1,0
BOT
0,13.0731166666667
V
0,25.1908302307129
V
-1,0
BOT
0,13.0797833333333
V
0,25.0668525695801
V
-1,0
BOT
0,13.08645
V
0,24.9571800231934
V
-1,0
BOT
0,13.0931166666667
V
0,24.871826171875
V
-1,0
BOT
0,13.0997833333333
V
0,24.8227119445801
V
-1,0
BOT
0,13.10645
V
0,24.8217582702637
V
-1,0
BOT
0,13.1131166666667
V
0,24.8837471008301
V
-1,0
BOT
0,13.1197833333333
V
0,25.0248908996582
V
-1,0
BOT
0,13.12645
V
0,25.2609252929687
V
-1,0
BOT
0,13.1331166666667
V
0,25.6094932556152
V
-1,0
BOT
0,13.1397833333333
V
0,26.0848999023437
V
-1,0
BOT
0,13.14645
V
0,26.7009735107422
V
-1,0
BOT
0,13.1531166666667
V
0,27.4686813354492
V
-1,0
BOT
0,13.1597833333333
V
0,28.3951759338379
V
-1,0
BOT
0,13.16645
V
0,29.4842720031738
V
-1,0
BOT
0,13.1731166666667
V
0,30.7326316833496
V
-1,0
BOT
0,13.1797833333333
V
0,32.1321487426758
V
-1,0
BOT
0,13.18645
V
0,33.6661338806152
V
-1,0
BOT
0,13.1931166666667
V
0,35.3097915649414
V
-1,0
BOT
0,13.1997833333333
V
0,37.0311737060547
V
-1,0
BOT
0,13.20645
V
0,38.7907028198242
V
-1,0
BOT
0,13.2131166666667
V
0,40.5421257019043
V
-1,0
BOT
0,13.2197833333333
V
0,42.2344207763672
V
-1,0
BOT
0,13.22645
V
0,43.8146591186523
V
-1,0
BOT
0,13.2331166666667
V
0,45.229434967041
V
-1,0
BOT
0,13.2397833333333
V
0,46.4296340942383
V
-1,0
BOT
0,13.24645
V
0,47.3699569702148
V
-1,0
BOT
0,13.2531166666667
V
0,48.0155944824219
V
-1,0
BOT
0,13.2597833333333
V
0,48.3427047729492
V
-1,0
BOT
0,13.26645
V
0,48.3417510986328
V
-1,0
BOT
0,13.2731166666667
V
0,48.0165481567383
V
-1,0
BOT
0,13.2797833333333
V
0,47.3856925964356
V
-1,0
BOT
0,13.28645
V
0,46.4797019958496
V
-1,0
BOT
0,13.2931166666667
V
0,45.3414916992188
V
-1,0
BOT
0,13.2997833333333
V
0,44.0230369567871
V
-1,0
BOT
0,13.30645
V
0,42.5777435302734
V
-1,0
BOT
0,13.3131166666667
V
0,41.0614013671875
V
-1,0
BOT
0,13.3197833333333
V
0,39.5269393920898
V
-1,0
BOT
0,13.32645
V
0,38.022518157959
V
-1,0
BOT
0,13.3331166666667
V
0,36.5877151489258
V
-1,0
BOT
0,13.3397833333333
V
0,35.2530479431152
V
-1,0
BOT
0,13.34645
V
0,34.0404510498047
V
-1,0
BOT
0,13.3531166666667
V
0,32.961368560791
V
-1,0
BOT
0,13.3597833333333
V
0,32.0205688476562
V
-1,0
BOT
0,13.36645
V
0,31.2137603759766
V
-1,0
BOT
0,13.3731166666667
V
0,30.5318832397461
V
-1,0
BOT
0,13.3797833333333
V
0,29.9620628356934
V
-1,0
BOT
0,13.38645
V
0,29.4895172119141
V
-1,0
BOT
0,13.3931166666667
V
0,29.0994644165039
V
-1,0
BOT
0,13.3997833333333
V
0,28.7775993347168
V
-1,0
BOT
0,13.40645
V
0,28.5096168518066
V
-1,0
BOT
0,13.4131166666667
V
0,28.282642364502
V
-1,0
BOT
0,13.4197833333333
V
0,28.0857086181641
V
-1,0
BOT
0,13.42645
V
0,27.9092788696289
V
-1,0
BOT
0,13.4331166666667
V
0,27.742862701416
V
-1,0
BOT
0,13.4397833333333
V
0,27.5783538818359
V
-1,0
BOT
0,13.44645
V
0,27.40478515625
V
-1,0
BOT
0,13.4531166666667
V
0,27.2130966186523
V
-1,0
BOT
0,13.4597833333333
V
0,26.9937515258789
V
-1,0
BOT
0,13.46645
V
0,26.7367362976074
V
-1,0
BOT
0,13.4731166666667
V
0,26.432991027832
V
-1,0
BOT
0,13.4797833333333
V
0,26.0739326477051
V
-1,0
BOT
0,13.48645
V
0,25.6543159484863
V
-1,0
BOT
0,13.4931166666667
V
0,25.1708030700684
V
-1,0
BOT
0,13.4997833333333
V
0,24.622917175293
V
-1,0
BOT
0,13.50645
V
0,24.0135192871094
V
-1,0
BOT
0,13.5131166666667
V
0,23.3488082885742
V
-1,0
BOT
0,13.5197833333333
V
0,22.6373672485352
V
-1,0
BOT
0,13.52645
V
0,21.8920707702637
V
-1,0
BOT
0,13.5331166666667
V
0,21.1262702941895
V
-1,0
BOT
0,13.5397833333333
V
0,20.3547477722168
V
-1,0
BOT
0,13.54645
V
0,19.59228515625
V
-1,0
BOT
0,13.5531166666667
V
0,18.8541412353516
V
-1,0
BOT
0,13.5597833333333
V
0,18.1541442871094
V
-1,0
BOT
0,13.56645
V
0,17.5023078918457
V
-1,0
BOT
0,13.5731166666667
V
0,16.9072151184082
V
-1,0
BOT
0,13.5797833333333
V
0,16.3750648498535
V
-1,0
BOT
0,13.58645
V
0,15.9082412719727
V
-1,0
BOT
0,13.5931166666667
V
0,15.507698059082
V
-1,0
BOT
0,13.5997833333333
V
0,15.1710510253906
V
-1,0
BOT
0,13.60645
V
0,14.8959159851074
V
-1,0
BOT
0,13.6131166666667
V
0,14.6775245666504
V
-1,0
BOT
0,13.6197833333333
V
0,14.5111083984375
V
-1,0
BOT
0,13.62645
V
0,14.3918991088867
V
-1,0
BOT
0,13.6331166666667
V
0,14.3136978149414
V
-1,0
BOT
0,13.6397833333333
V
0,14.2712593078613
V
-1,0
BOT
0,13.64645
V
0,14.2598152160645
V
-1,0
BOT
0,13.6531166666667
V
0,14.2741203308105
V
-1,0
BOT
0,13.6597833333333
V
0,14.310359954834
V
-1,0
BOT
0,13.66645
V
0,14.3661499023437
V
-1,0
BOT
0,13.6731166666667
V
0,14.4386291503906
V
-1,0
BOT
0,13.6797833333333
V
0,14.5254135131836
V
-1,0
BOT
0,13.68645
V
0,14.6241188049316
V
-1,0
BOT
0,13.6931166666667
V
0,14.7347450256348
V
-1,0
BOT
0,13.6997833333333
V
0,14.8539543151855
V
-1,0
BOT
0,13.70645
V
0,14.9798393249512
V
-1,0
BOT
0,13.7131166666667
V
0,15.1124000549316
V
-1,0
BOT
0,13.7197833333333
V
0,15.2506828308105
V
-1,0
BOT
0,13.72645
V
0,15.3932571411133
V
-1,0
BOT
0,13.7331166666667
V
0,15.5396461486816
V
-1,0
BOT
0,13.7397833333333
V
0,15.6898498535156
V
-1,0
BOT
0,13.74645
V
0,15.8438682556152
V
-1,0
BOT
0,13.7531166666667
V
0,16.0012245178223
V
-1,0
BOT
0,13.7597833333333
V
0,16.1619186401367
V
-1,0
BOT
0,13.76645
V
0,16.3264274597168
V
-1,0
BOT
0,13.7731166666667
V
0,16.4957046508789
V
-1,0
BOT
0,13.7797833333333
V
0,16.669750213623
V
-1,0
BOT
0,13.78645
V
0,16.8476104736328
V
-1,0
BOT
0,13.7931166666667
V
0,17.02880859375
V
-1,0
BOT
0,13.7997833333333
V
0,17.2109603881836
V
-1,0
BOT
0,13.80645
V
0,17.3916816711426
V
-1,0
BOT
0,13.8131166666667
V
0,17.5671577453613
V
-1,0
BOT
0,13.8197833333333
V
0,17.7326202392578
V
-1,0
BOT
0,13.82645
V
0,17.8842544555664
V
-1,0
BOT
0,13.8331166666667
V
0,18.0158615112305
V
-1,0
BOT
0,13.8397833333333
V
0,18.1236267089844
V
-1,0
BOT
0,13.84645
V
0,18.2027816772461
V
-1,0
BOT
0,13.8531166666667
V
0,18.2499885559082
V
-1,0
BOT
0,13.8597833333333
V
0,18.2638168334961
V
-1,0
BOT
0,13.86645
V
0,18.2428359985352
V
-1,0
BOT
0,13.8731166666667
V
0,18.1884765625
V
-1,0
BOT
0,13.8797833333333
V
0,18.1031227111816
V
-1,0
BOT
0,13.88645
V
0,17.9905891418457
V
-1,0
BOT
0,13.8931166666667
V
0,17.855167388916
V
-1,0
BOT
0,13.8997833333333
V
0,17.7016258239746
V
-1,0
BOT
0,13.90645
V
0,17.5356864929199
V
-1,0
BOT
0,13.9131166666667
V
0,17.3625946044922
V
-1,0
BOT
0,13.9197833333333
V
0,17.1890258789062
V
-1,0
BOT
0,13.92645
V
0,17.0192718505859
V
-1,0
BOT
0,13.9331166666667
V
0,16.8585777282715
V
-1,0
BOT
0,13.9397833333333
V
0,16.7117118835449
V
-1,0
BOT
0,13.94645
V
0,16.5824890136719
V
-1,0
BOT
0,13.9531166666667
V
0,16.4737701416016
V
-1,0
BOT
0,13.9597833333333
V
0,16.3865089416504
V
-1,0
BOT
0,13.96645
V
0,16.322135925293
V
-1,0
BOT
0,13.9731166666667
V
0,16.2811279296875
V
-1,0
BOT
0,13.9797833333333
V
0,16.2625312805176
V
-1,0
BOT
0,13.98645
V
0,16.2653923034668
V
-1,0
BOT
0,13.9931166666667
V
0,16.2887573242187
V
-1,0
BOT
0,13.9997833333333
V
0,16.3302421569824
V
-1,0
BOT
0,14.00645
V
0,16.3898468017578
V
-1,0
BOT
0,14.0131166666667
V
0,16.4651870727539
V
-1,0
BOT
0,14.0197833333333
V
0,16.5548324584961
V
-1,0
BOT
0,14.02645
V
0,16.6583061218262
V
-1,0
BOT
0,14.0331166666667
V
0,16.7751312255859
V
-1,0
BOT
0,14.0397833333333
V
0,16.9053077697754
V
-1,0
BOT
0,14.04645
V
0,17.0493125915527
V
-1,0
BOT
0,14.0531166666667
V
0,17.2080993652344
V
-1,0
BOT
0,14.0597833333333
V
0,17.3835754394531
V
-1,0
BOT
0,14.06645
V
0,17.5786018371582
V
-1,0
BOT
0,14.0731166666667
V
0,17.7960395812988
V
-1,0
BOT
0,14.0797833333333
V
0,18.0420875549316
V
-1,0
BOT
0,14.08645
V
0,18.3229446411133
V
-1,0
BOT
0,14.0931166666667
V
0,18.6452865600586
V
-1,0
BOT
0,14.0997833333333
V
0,19.019603729248
V
-1,0
BOT
0,14.10645
V
0,19.4568634033203
V
-1,0
BOT
0,14.1131166666667
V
0,19.9708938598633
V
-1,0
BOT
0,14.1197833333333
V
0,20.5769538879395
V
-1,0
BOT
0,14.12645
V
0,21.2917327880859
V
-1,0
BOT
0,14.1331166666667
V
0,22.1352577209473
V
-1,0
BOT
0,14.1397833333333
V
0,23.1270790100098
V
-1,0
BOT
0,14.14645
V
0,24.2886543273926
V
-1,0
BOT
0,14.1531166666667
V
0,25.6400108337402
V
-1,0
BOT
0,14.1597833333333
V
0,27.1987915039062
V
-1,0
BOT
0,14.16645
V
0,28.9783477783203
V
-1,0
BOT
0,14.1731166666667
V
0,30.9877395629883
V
-1,0
BOT
0,14.1797833333333
V
0,33.2269668579102
V
-1,0
BOT
0,14.18645
V
0,35.6874465942383
V
-1,0
BOT
0,14.1931166666667
V
0,38.3501052856445
V
-1,0
BOT
0,14.1997833333333
V
0,41.1820411682129
V
-1,0
BOT
0,14.20645
V
0,44.1384315490723
V
-1,0
BOT
0,14.2131166666667
V
0,47.1639633178711
V
-1,0
BOT
0,14.2197833333333
V
0,50.1914024353027
V
-1,0
BOT
0,14.22645
V
0,53.1449317932129
V
-1,0
BOT
0,14.2331166666667
V
0,55.9425354003906
V
-1,0
BOT
0,14.2397833333333
V
0,58.5012435913086
V
-1,0
BOT
0,14.24645
V
0,60.7404708862305
V
-1,0
BOT
0,14.2531166666667
V
0,62.586784362793
V
-1,0
BOT
0,14.2597833333333
V
0,63.9772415161133
V
-1,0
BOT
0,14.26645
V
0,64.8646354675293
V
-1,0
BOT
0,14.2731166666667
V
0,65.220832824707
V
-1,0
BOT
0,14.2797833333333
V
0,65.037727355957
V
-1,0
BOT
0,14.28645
V
0,64.3272399902344
V
-1,0
BOT
0,14.2931166666667
V
0,63.1213188171387
V
-1,0
BOT
0,14.2997833333333
V
0,61.4690780639648
V
-1,0
BOT
0,14.30645
V
0,59.4334602355957
V
-1,0
BOT
0,14.3131166666667
V
0,57.0874214172363
V
-1,0
BOT
0,14.3197833333333
V
0,54.509162902832
V
-1,0
BOT
0,14.32645
V
0,51.7773628234863
V
-1,0
BOT
0,14.3331166666667
V
0,48.9692687988281
V
-1,0
BOT
0,14.3397833333333
V
0,46.1540222167969
V
-1,0
BOT
0,14.34645
V
0,43.3917045593262
V
-1,0
BOT
0,14.3531166666667
V
0,40.7319068908691
V
-1,0
BOT
0,14.3597833333333
V
0,38.2122993469238
V
-1,0
BOT
0,14.36645
V
0,35.8586311340332
V
-1,0
BOT
0,14.3731166666667
V
0,33.6856842041016
V
-1,0
BOT
0,14.3797833333333
V
0,31.6991806030273
V
-1,0
BOT
0,14.38645
V
0,29.8986434936523
V
-1,0
BOT
0,14.3931166666667
V
0,28.2778739929199
V
-1,0
BOT
0,14.3997833333333
V
0,26.8278121948242
V
-1,0
BOT
0,14.40645
V
0,25.5365371704102
V
-1,0
BOT
0,14.4131166666667
V
0,24.3945121765137
V
-1,0
BOT
0,14.4197833333333
V
0,23.3907699584961
V
-1,0
BOT
0,14.42645
V
0,22.517204284668
V
-1,0
BOT
0,14.4331166666667
V
0,21.7657089233398
V
-1,0
BOT
0,14.4397833333333
V
0,21.1324691772461
V
-1,0
BOT
0,14.44645
V
0,20.6122398376465
V
-1,0
BOT
0,14.4531166666667
V
0,20.2021598815918
V
-1,0
BOT
0,14.4597833333333
V
0,19.8979377746582
V
-1,0
BOT
0,14.46645
V
0,19.6962356567383
V
-1,0
BOT
0,14.4731166666667
V
0,19.5932388305664
V
-1,0
BOT
0,14.4797833333333
V
0,19.5817947387695
V
-1,0
BOT
0,14.48645
V
0,19.6547508239746
V
-1,0
BOT
0,14.4931166666667
V
0,19.8030471801758
V
-1,0
BOT
0,14.4997833333333
V
0,20.0142860412598
V
-1,0
BOT
0,14.50645
V
0,20.2755928039551
V
-1,0
BOT
0,14.5131166666667
V
0,20.571231842041
V
-1,0
BOT
0,14.5197833333333
V
0,20.8835601806641
V
-1,0
BOT
0,14.52645
V
0,21.1944580078125
V
-1,0
BOT
0,14.5331166666667
V
0,21.4848518371582
V
-1,0
BOT
0,14.5397833333333
V
0,21.7361450195312
V
-1,0
BOT
0,14.54645
V
0,21.9316482543945
V
-1,0
BOT
0,14.5531166666667
V
0,22.0556259155273
V
-1,0
BOT
0,14.5597833333333
V
0,22.0952033996582
V
-1,0
BOT
0,14.56645
V
0,22.0427513122559
V
-1,0
BOT
0,14.5731166666667
V
0,21.8925476074219
V
-1,0
BOT
0,14.5797833333333
V
0,21.6450691223145
V
-1,0
BOT
0,14.58645
V
0,21.3055610656738
V
-1,0
BOT
0,14.5931166666667
V
0,20.8840370178223
V
-1,0
BOT
0,14.5997833333333
V
0,20.3943252563477
V
-1,0
BOT
0,14.60645
V
0,19.8540687561035
V
-1,0
BOT
0,14.6131166666667
V
0,19.2818641662598
V
-1,0
BOT
0,14.6197833333333
V
0,18.6982154846191
V
-1,0
BOT
0,14.62645
V
0,18.122673034668
V
-1,0
BOT
0,14.6331166666667
V
0,17.5724029541016
V
-1,0
BOT
0,14.6397833333333
V
0,17.0621871948242
V
-1,0
BOT
0,14.64645
V
0,16.6029930114746
V
-1,0
BOT
0,14.6531166666667
V
0,16.202449798584
V
-1,0
BOT
0,14.6597833333333
V
0,15.8653259277344
V
-1,0
BOT
0,14.66645
V
0,15.5916213989258
V
-1,0
BOT
0,14.6731166666667
V
0,15.3799057006836
V
-1,0
BOT
0,14.6797833333333
V
0,15.2254104614258
V
-1,0
BOT
0,14.68645
V
0,15.1233673095703
V
-1,0
BOT
0,14.6931166666667
V
0,15.068531036377
V
-1,0
BOT
0,14.6997833333333
V
0,15.0532722473145
V
-1,0
BOT
0,14.70645
V
0,15.0718688964844
V
-1,0
BOT
0,14.7131166666667
V
0,15.1185989379883
V
-1,0
BOT
0,14.7197833333333
V
0,15.1872634887695
V
-1,0
BOT
0,14.72645
V
0,15.2735710144043
V
-1,0
BOT
0,14.7331166666667
V
0,15.3741836547852
V
-1,0
BOT
0,14.7397833333333
V
0,15.4852867126465
V
-1,0
BOT
0,14.74645
V
0,15.6054496765137
V
-1,0
BOT
0,14.7531166666667
V
0,15.7332420349121
V
-1,0
BOT
0,14.7597833333333
V
0,15.8677101135254
V
-1,0
BOT
0,14.76645
V
0,16.0079002380371
V
-1,0
BOT
0,14.7731166666667
V
0,16.1542892456055
V
-1,0
BOT
0,14.7797833333333
V
0,16.3064002990723
V
-1,0
BOT
0,14.78645
V
0,16.4642333984375
V
-1,0
BOT
0,14.7931166666667
V
0,16.6268348693848
V
-1,0
BOT
0,14.7997833333333
V
0,16.7951583862305
V
-1,0
BOT
0,14.80645
V
0,16.9682502746582
V
-1,0
BOT
0,14.8131166666667
V
0,17.146110534668
V
-1,0
BOT
0,14.8197833333333
V
0,17.3277854919434
V
-1,0
BOT
0,14.82645
V
0,17.5132751464844
V
-1,0
BOT
0,14.8331166666667
V
0,17.7021026611328
V
-1,0
BOT
0,14.8397833333333
V
0,17.8942680358887
V
-1,0
BOT
0,14.84645
V
0,18.092155456543
V
-1,0
BOT
0,14.8531166666667
V
0,18.2967185974121
V
-1,0
BOT
0,14.8597833333333
V
0,18.5117721557617
V
-1,0
BOT
0,14.86645
V
0,18.7406539916992
V
-1,0
BOT
0,14.8731166666667
V
0,18.9881324768066
V
-1,0
BOT
0,14.8797833333333
V
0,19.2584991455078
V
-1,0
BOT
0,14.88645
V
0,19.5584297180176
V
-1,0
BOT
0,14.8931166666667
V
0,19.8931694030762
V
-1,0
BOT
0,14.8997833333333
V
0,20.2670097351074
V
-1,0
BOT
0,14.90645
V
0,20.6847190856934
V
-1,0
BOT
0,14.9131166666667
V
0,21.1491584777832
V
-1,0
BOT
0,14.9197833333333
V
0,21.6608047485352
V
-1,0
BOT
0,14.92645
V
0,22.2172737121582
V
-1,0
BOT
0,14.9331166666667
V
0,22.8147506713867
V
-1,0
BOT
0,14.9397833333333
V
0,23.4456062316895
V
-1,0
BOT
0,14.94645
V
0,24.1012573242187
V
-1,0
BOT
0,14.9531166666667
V
0,24.7693061828613
V
-1,0
BOT
0,14.9597833333333
V
0,25.4364013671875
V
-1,0
BOT
0,14.96645
V
0,26.0882377624512
V
-1,0
BOT
0,14.9731166666667
V
0,26.7109870910645
V
-1,0
BOT
0,14.9797833333333
V
0,27.2903442382812
V
-1,0
BOT
0,14.98645
V
0,27.8134346008301
V
-1,0
BOT
0,14.9931166666667
V
0,28.2692909240723
V
-1,0
BOT
0,14.9997833333333
V
0,28.648853302002
V
-1,0
BOT
0,15.00645
V
0,28.9478302001953
V
-1,0
BOT
0,15.0131166666667
V
0,29.1628837585449
V
-1,0
BOT
0,15.0197833333333
V
0,29.2959213256836
V
-1,0
BOT
0,15.02645
V
0,29.353141784668
V
-1,0
BOT
0,15.0331166666667
V
0,29.3445587158203
V
-1,0
BOT
0,15.0397833333333
V
0,29.2835235595703
V
-1,0
BOT
0,15.04645
V
0,29.1881561279297
V
-1,0
BOT
0,15.0531166666667
V
0,29.078483581543
V
-1,0
BOT
0,15.0597833333333
V
0,28.9764404296875
V
-1,0
BOT
0,15.06645
V
0,28.9063453674316
V
-1,0
BOT
0,15.0731166666667
V
0,28.8925170898437
V
-1,0
BOT
0,15.0797833333333
V
0,28.9597511291504
V
-1,0
BOT
0,15.08645
V
0,29.1333198547363
V
-1,0
BOT
0,15.0931166666667
V
0,29.4375419616699
V
-1,0
BOT
0,15.0997833333333
V
0,29.8933982849121
V
-1,0
BOT
0,15.10645
V
0,30.5213928222656
V
-1,0
BOT
0,15.1131166666667
V
0,31.3372611999512
V
-1,0
BOT
0,15.1197833333333
V
0,32.353401184082
V
-1,0
BOT
0,15.12645
V
0,33.5745811462402
V
-1,0
BOT
0,15.1331166666667
V
0,34.9998474121094
V
-1,0
BOT
0,15.1397833333333
V
0,36.6206169128418
V
-1,0
BOT
0,15.14645
V
0,38.421630859375
V
-1,0
BOT
0,15.1531166666667
V
0,40.3752326965332
V
-1,0
BOT
0,15.1597833333333
V
0,42.445182800293
V
-1,0
BOT
0,15.16645
V
0,44.5871353149414
V
-1,0
BOT
0,15.1731166666667
V
0,46.748161315918
V
-1,0
BOT
0,15.1797833333333
V
0,48.8696098327637
V
-1,0
BOT
0,15.18645
V
0,50.8894920349121
V
-1,0
BOT
0,15.1931166666667
V
0,52.7467727661133
V
-1,0
BOT
0,15.1997833333333
V
0,54.3842315673828
V
-1,0
BOT
0,15.20645
V
0,55.7522773742676
V
-1,0
BOT
0,15.2131166666667
V
0,56.8113327026367
V
-1,0
BOT
0,15.2197833333333
V
0,57.5361251831055
V
-1,0
BOT
0,15.22645
V
0,57.9161643981934
V
-1,0
BOT
0,15.2331166666667
V
0,57.9605102539063
V
-1,0
BOT
0,15.2397833333333
V
0,57.6930046081543
V
-1,0
BOT
0,15.24645
V
0,57.1560859680176
V
-1,0
BOT
0,15.2531166666667
V
0,56.4045906066895
V
-1,0
BOT
0,15.2597833333333
V
0,55.5047988891602
V
-1,0
BOT
0,15.26645
V
0,54.5268058776856
V
-1,0
BOT
0,15.2731166666667
V
0,53.5435676574707
V
-1,0
BOT
0,15.2797833333333
V
0,52.6213645935059
V
-1,0
BOT
0,15.28645
V
0,51.8178939819336
V
-1,0
BOT
0,15.2931166666667
V
0,51.175594329834
V
-1,0
BOT
0,15.2997833333333
V
0,50.7230758666992
V
-1,0
BOT
0,15.30645
V
0,50.4703521728516
V
-1,0
BOT
0,15.3131166666667
V
0,50.4097938537598
V
-1,0
BOT
0,15.3197833333333
V
0,50.5175590515137
V
-1,0
BOT
0,15.32645
V
0,50.7540702819824
V
-1,0
BOT
0,15.3331166666667
V
0,51.0697364807129
V
-1,0
BOT
0,15.3397833333333
V
0,51.4059066772461
V
-1,0
BOT
0,15.34645
V
0,51.7001152038574
V
-1,0
BOT
0,15.3531166666667
V
0,51.8898963928223
V
-1,0
BOT
0,15.3597833333333
V
0,51.9180297851563
V
-1,0
BOT
0,15.36645
V
0,51.7354011535645
V
-1,0
BOT
0,15.3731166666667
V
0,51.304817199707
V
-1,0
BOT
0,15.3797833333333
V
0,50.6019592285156
V
-1,0
BOT
0,15.38645
V
0,49.619197845459
V
-1,0
BOT
0,15.3931166666667
V
0,48.3613014221191
V
-1,0
BOT
0,15.3997833333333
V
0,46.849250793457
V
-1,0
BOT
0,15.40645
V
0,45.1164245605469
V
-1,0
BOT
0,15.4131166666667
V
0,43.2062149047852
V
-1,0
BOT
0,15.4197833333333
V
0,41.1691665649414
V
-1,0
BOT
0,15.42645
V
0,39.060115814209
V
-1,0
BOT
0,15.4331166666667
V
0,36.9343757629395
V
-1,0
BOT
0,15.4397833333333
V
0,34.8434448242187
V
-1,0
BOT
0,15.44645
V
0,32.8335762023926
V
-1,0
BOT
0,15.4531166666667
V
0,30.94482421875
V
-1,0
BOT
0,15.4597833333333
V
0,29.2062759399414
V
-1,0
BOT
0,15.46645
V
0,27.6398658752441
V
-1,0
BOT
0,15.4731166666667
V
0,26.2575149536133
V
-1,0
BOT
0,15.4797833333333
V
0,25.0644683837891
V
-1,0
BOT
0,15.48645
V
0,24.0573883056641
V
-1,0
BOT
0,15.4931166666667
V
0,23.2291221618652
V
-1,0
BOT
0,15.4997833333333
V
0,22.5663185119629
V
-1,0
BOT
0,15.50645
V
0,22.0556259155273
V
-1,0
BOT
0,15.5131166666667
V
0,21.6808319091797
V
-1,0
BOT
0,15.5197833333333
V
0,21.425724029541
V
-1,0
BOT
0,15.52645
V
0,21.2740898132324
V
-1,0
BOT
0,15.5331166666667
V
0,21.2106704711914
V
-1,0
BOT
0,15.5397833333333
V
0,21.2211608886719
V
-1,0
BOT
0,15.54645
V
0,21.2926864624023
V
-1,0
BOT
0,15.5531166666667
V
0,21.4142799377441
V
-1,0
BOT
0,15.5597833333333
V
0,21.5768814086914
V
-1,0
BOT
0,15.56645
V
0,21.7714309692383
V
-1,0
BOT
0,15.5731166666667
V
0,21.9912528991699
V
-1,0
BOT
0,15.5797833333333
V
0,22.2315788269043
V
-1,0
BOT
0,15.58645
V
0,22.4881172180176
V
-1,0
BOT
0,15.5931166666667
V
0,22.7570533752441
V
-1,0
BOT
0,15.5997833333333
V
0,23.0364799499512
V
-1,0
BOT
0,15.60645
V
0,23.3254432678223
V
-1,0
BOT
0,15.6131166666667
V
0,23.6239433288574
V
-1,0
BOT
0,15.6197833333333
V
0,23.9319801330566
V
-1,0
BOT
0,15.62645
V
0,24.2500305175781
V
-1,0
BOT
0,15.6331166666667
V
0,24.5785713195801
V
-1,0
BOT
0,15.6397833333333
V
0,24.9195098876953
V
-1,0
BOT
0,15.64645
V
0,25.273323059082
V
-1,0
BOT
0,15.6531166666667
V
0,25.641918182373
V
-1,0
BOT
0,15.6597833333333
V
0,26.0252952575684
V
-1,0
BOT
0,15.66645
V
0,26.425838470459
V
-1,0
BOT
0,15.6731166666667
V
0,26.8449783325195
V
-1,0
BOT
0,15.6797833333333
V
0,27.2841453552246
V
-1,0
BOT
0,15.68645
V
0,27.7471542358398
V
-1,0
BOT
0,15.6931166666667
V
0,28.2373428344727
V
-1,0
BOT
0,15.6997833333333
V
0,28.7590026855469
V
-1,0
BOT
0,15.70645
V
0,29.320240020752
V
-1,0
BOT
0,15.7131166666667
V
0,29.9277305603027
V
-1,0
BOT
0,15.7197833333333
V
0,30.5919647216797
V
-1,0
BOT
0,15.72645
V
0,31.3243865966797
V
-1,0
BOT
0,15.7331166666667
V
0,32.1378707885742
V
-1,0
BOT
0,15.7397833333333
V
0,33.0452919006348
V
-1,0
BOT
0,15.74645
V
0,34.0604782104492
V
-1,0
BOT
0,15.7531166666667
V
0,35.1963043212891
V
-1,0
BOT
0,15.7597833333333
V
0,36.4632606506348
V
-1,0
BOT
0,15.76645
V
0,37.869930267334
V
-1,0
BOT
0,15.7731166666667
V
0,39.4210815429687
V
-1,0
BOT
0,15.7797833333333
V
0,41.1157608032227
V
-1,0
BOT
0,15.78645
V
0,42.9482460021973
V
-1,0
BOT
0,15.7931166666667
V
0,44.9094772338867
V
-1,0
BOT
0,15.7997833333333
V
0,46.9832420349121
V
-1,0
BOT
0,15.80645
V
0,49.1509437561035
V
-1,0
BOT
0,15.8131166666667
V
0,51.3901710510254
V
-1,0
BOT
0,15.8197833333333
V
0,53.6789894104004
V
-1,0
BOT
0,15.82645
V
0,55.9964179992676
V
-1,0
BOT
0,15.8331166666667
V
0,58.3271980285645
V
-1,0
BOT
0,15.8397833333333
V
0,60.6637001037598
V
-1,0
BOT
0,15.84645
V
0,63.0092620849609
V
-1,0
BOT
0,15.8531166666667
V
0,65.3800964355469
V
-1,0
BOT
0,15.8597833333333
V
0,67.81005859375
V
-1,0
BOT
0,15.86645
V
0,70.3468322753906
V
-1,0
BOT
0,15.8731166666667
V
0,73.0562210083008
V
-1,0
BOT
0,15.8797833333333
V
0,76.0149955749512
V
-1,0
BOT
0,15.88645
V
0,79.3108940124512
V
-1,0
BOT
0,15.8931166666667
V
0,83.0378532409668
V
-1,0
BOT
0,15.8997833333333
V
0,87.2883796691895
V
-1,0
BOT
0,15.90645
V
0,92.1473503112793
V
-1,0
BOT
0,15.9131166666667
V
0,97.6853370666504
V
-1,0
BOT
0,15.9197833333333
V
0,103.949546813965
V
-1,0
BOT
0,15.92645
V
0,110.95666885376
V
-1,0
BOT
0,15.9331166666667
V
0,118.686676025391
V
-1,0
BOT
0,15.9397833333333
V
0,127.079963684082
V
-1,0
BOT
0,15.94645
V
0,136.031627655029
V
-1,0
BOT
0,15.9531166666667
V
0,145.389080047607
V
-1,0
BOT
0,15.9597833333333
V
0,154.955387115479
V
-1,0
BOT
0,15.96645
V
0,164.494514465332
V
-1,0
BOT
0,15.9731166666667
V
0,173.738956451416
V
-1,0
BOT
0,15.9797833333333
V
0,182.397842407227
V
-1,0
BOT
0,15.98645
V
0,190.17219543457
V
-1,0
BOT
0,15.9931166666667
V
0,196.766376495361
V
-1,0
BOT
0,15.9997833333333
V
0,201.908111572266
V
-1,0
BOT
0,16.00645
V
0,205.363750457764
V
-1,0
BOT
0,16.0131166666667
V
0,206.950187683105
V
-1,0
BOT
0,16.0197833333333
V
0,206.549167633057
V
-1,0
BOT
0,16.02645
V
0,204.118251800537
V
-1,0
BOT
0,16.0331166666667
V
0,199.69654083252
V
-1,0
BOT
0,16.0397833333333
V
0,193.405628204346
V
-1,0
BOT
0,16.04645
V
0,185.440540313721
V
-1,0
BOT
0,16.0531166666667
V
0,176.064491271973
V
-1,0
BOT
0,16.0597833333333
V
0,165.58837890625
V
-1,0
BOT
0,16.06645
V
0,154.356002807617
V
-1,0
BOT
0,16.0731166666667
V
0,142.722606658936
V
-1,0
BOT
0,16.0797833333333
V
0,131.036758422852
V
-1,0
BOT
0,16.08645
V
0,119.619369506836
V
-1,0
BOT
0,16.0931166666667
V
0,108.752727508545
V
-1,0
BOT
0,16.0997833333333
V
0,98.6723899841309
V
-1,0
BOT
0,16.10645
V
0,89.5590782165527
V
-1,0
BOT
0,16.1131166666667
V
0,81.5386772155762
V
-1,0
BOT
0,16.1197833333333
V
0,74.6831893920898
V
-1,0
BOT
0,16.12645
V
0,69.0164566040039
V
-1,0
BOT
0,16.1331166666667
V
0,64.5217895507813
V
-1,0
BOT
0,16.1397833333333
V
0,61.1476898193359
V
-1,0
BOT
0,16.14645
V
0,58.8188171386719
V
-1,0
BOT
0,16.1531166666667
V
0,57.4421882629395
V
-1,0
BOT
0,16.1597833333333
V
0,56.9157600402832
V
-1,0
BOT
0,16.16645
V
0,57.1351051330566
V
-1,0
BOT
0,16.1731166666667
V
0,57.9943656921387
V
-1,0
BOT
0,16.1797833333333
V
0,59.3886375427246
V
-1,0
BOT
0,16.18645
V
0,61.2177848815918
V
-1,0
BOT
0,16.1931166666667
V
0,63.3840560913086
V
-1,0
BOT
0,16.1997833333333
V
0,65.7925605773926
V
-1,0
BOT
0,16.20645
V
0,68.3517456054688
V
-1,0
BOT
0,16.2131166666667
V
0,70.9700584411621
V
-1,0
BOT
0,16.2197833333333
V
0,73.5573768615723
V
-1,0
BOT
0,16.22645
V
0,76.024055480957
V
-1,0
BOT
0,16.2331166666667
V
0,78.282356262207
V
-1,0
BOT
0,16.2397833333333
V
0,80.2469253540039
V
-1,0
BOT
0,16.24645
V
0,81.8362236022949
V
-1,0
BOT
0,16.2531166666667
V
0,82.9777717590332
V
-1,0
BOT
0,16.2597833333333
V
0,83.6105346679688
V
-1,0
BOT
0,16.26645
V
0,83.6896896362305
V
-1,0
BOT
0,16.2731166666667
V
0,83.1880569458008
V
-1,0
BOT
0,16.2797833333333
V
0,82.0994377136231
V
-1,0
BOT
0,16.28645
V
0,80.4409980773926
V
-1,0
BOT
0,16.2931166666667
V
0,78.251838684082
V
-1,0
BOT
0,16.2997833333333
V
0,75.5906105041504
V
-1,0
BOT
0,16.30645
V
0,72.5317001342773
V
-1,0
BOT
0,16.3131166666667
V
0,69.1637992858887
V
-1,0
BOT
0,16.3197833333333
V
0,65.5827522277832
V
-1,0
BOT
0,16.32645
V
0,61.8877410888672
V
-1,0
BOT
0,16.3331166666667
V
0,58.1760406494141
V
-1,0
BOT
0,16.3397833333333
V
0,54.5368194580078
V
-1,0
BOT
0,16.34645
V
0,51.0497093200684
V
-1,0
BOT
0,16.3531166666667
V
0,47.7795600891113
V
-1,0
BOT
0,16.3597833333333
V
0,44.7754859924316
V
-1,0
BOT
0,16.36645
V
0,42.0713424682617
V
-1,0
BOT
0,16.3731166666667
V
0,39.6828651428223
V
-1,0
BOT
0,16.3797833333333
V
0,37.6138687133789
V
-1,0
BOT
0,16.38645
V
0,35.8538627624512
V
-1,0
BOT
0,16.3931166666667
V
0,34.3837738037109
V
-1,0
BOT
0,16.3997833333333
V
0,33.174991607666
V
-1,0
BOT
0,16.40645
V
0,32.1946144104004
V
-1,0
BOT
0,16.4131166666667
V
0,31.4068794250488
V
-1,0
BOT
0,16.4197833333333
V
0,30.7755470275879
V
-1,0
BOT
0,16.42645
V
0,30.2648544311523
V
-1,0
BOT
0,16.4331166666667
V
0,29.8418998718262
V
-1,0
BOT
0,16.4397833333333
V
0,29.477596282959
V
-1,0
BOT
0,16.44645
V
0,29.146671295166
V
-1,0
BOT
0,16.4531166666667
V
0,28.8286209106445
V
-1,0
BOT
0,16.4597833333333
V
0,28.5077095031738
V
-1,0
BOT
0,16.46645
V
0,28.1739234924316
V
-1,0
BOT
0,16.4731166666667
V
0,27.8229713439941
V
-1,0
BOT
0,16.4797833333333
V
0,27.4534225463867
V
-1,0
BOT
0,16.48645
V
0,27.0705223083496
V
-1,0
BOT
0,16.4931166666667
V
0,26.6819000244141
V
-1,0
BOT
0,16.4997833333333
V
0,26.2994766235352
V
-1,0
BOT
0,16.50645
V
0,25.9356498718262
V
-1,0
BOT
0,16.5131166666667
V
0,25.6032943725586
V
-1,0
BOT
0,16.5197833333333
V
0,25.3171920776367
V
-1,0
BOT
0,16.52645
V
0,25.0897407531738
V
-1,0
BOT
0,16.5331166666667
V
0,24.9314308166504
V
-1,0
BOT
0,16.5397833333333
V
0,24.8498916625977
V
-1,0
BOT
0,16.54645
V
0,24.8508453369141
V
-1,0
BOT
0,16.5531166666667
V
0,24.9381065368652
V
-1,0
BOT
0,16.5597833333333
V
0,25.1107215881348
V
-1,0
BOT
0,16.56645
V
0,25.3658294677734
V
-1,0
BOT
0,16.5731166666667
V
0,25.698184967041
V
-1,0
BOT
0,16.5797833333333
V
0,26.0982513427734
V
-1,0
BOT
0,16.58645
V
0,26.5541076660156
V
-1,0
BOT
0,16.5931166666667
V
0,27.0485877990723
V
-1,0
BOT
0,16.5997833333333
V
0,27.5635719299316
V
-1,0
BOT
0,16.60645
V
0,28.0814170837402
V
-1,0
BOT
0,16.6131166666667
V
0,28.5811424255371
V
-1,0
BOT
0,16.6197833333333
V
0,29.0451049804687
V
-1,0
BOT
0,16.62645
V
0,29.4575691223145
V
-1,0
BOT
0,16.6331166666667
V
0,29.8047065734863
V
-1,0
BOT
0,16.6397833333333
V
0,30.0769805908203
V
-1,0
BOT
0,16.64645
V
0,30.2667617797852
V
-1,0
BOT
0,16.6531166666667
V
0,30.369758605957
V
-1,0
BOT
0,16.6597833333333
V
0,30.3845405578613
V
-1,0
BOT
0,16.66645
V
0,30.3134918212891
V
-1,0
BOT
0,16.6731166666667
V
0,30.1604270935059
V
-1,0
BOT
0,16.6797833333333
V
0,29.9339294433594
V
-1,0
BOT
0,16.68645
V
0,29.6425819396973
V
-1,0
BOT
0,16.6931166666667
V
0,29.2987823486328
V
-1,0
BOT
0,16.6997833333333
V
0,28.9130210876465
V
-1,0
BOT
0,16.70645
V
0,28.4991264343262
V
-1,0
BOT
0,16.7131166666667
V
0,28.0680656433105
V
-1,0
BOT
0,16.7197833333333
V
0,27.6303291320801
V
-1,0
BOT
0,16.72645
V
0,27.195930480957
V
-1,0
BOT
0,16.7331166666667
V
0,26.7724990844727
V
-1,0
BOT
0,16.7397833333333
V
0,26.3662338256836
V
-1,0
BOT
0,16.74645
V
0,25.9819030761719
V
-1,0
BOT
0,16.7531166666667
V
0,25.6233215332031
V
-1,0
BOT
0,16.7597833333333
V
0,25.2928733825684
V
-1,0
BOT
0,16.76645
V
0,24.9910354614258
V
-1,0
BOT
0,16.7731166666667
V
0,24.7173309326172
V
-1,0
BOT
0,16.7797833333333
V
0,24.4708061218262
V
-1,0
BOT
0,16.78645
V
0,24.2509841918945
V
-1,0
BOT
0,16.7931166666667
V
0,24.055004119873
V
-1,0
BOT
0,16.7997833333333
V
0,23.8804817199707
V
-1,0
BOT
0,16.80645
V
0,23.7250328063965
V
-1,0
BOT
0,16.8131166666667
V
0,23.5867500305176
V
-1,0
BOT
0,16.8197833333333
V
0,23.4627723693848
V
-1,0
BOT
0,16.82645
V
0,23.350715637207
V
-1,0
BOT
0,16.8331166666667
V
0,23.2481956481934
V
-1,0
BOT
0,16.8397833333333
V
0,23.1542587280273
V
-1,0
BOT
0,16.84645
V
0,23.0679512023926
V
-1,0
BOT
0,16.8531166666667
V
0,22.9887962341309
V
-1,0
BOT
0,16.8597833333333
V
0,22.9177474975586
V
-1,0
BOT
0,16.86645
V
0,22.855281829834
V
-1,0
BOT
0,16.8731166666667
V
0,22.8033065795898
V
-1,0
BOT
0,16.8797833333333
V
0,22.7642059326172
V
-1,0
BOT
0,16.88645
V
0,22.7394104003906
V
-1,0
BOT
0,16.8931166666667
V
0,22.7322578430176
V
-1,0
BOT
0,16.8997833333333
V
0,22.7456092834473
V
-1,0
BOT
0,16.90645
V
0,22.7823257446289
V
-1,0
BOT
0,16.9131166666667
V
0,22.8452682495117
V
-1,0
BOT
0,16.9197833333333
V
0,22.9358673095703
V
-1,0
BOT
0,16.92645
V
0,23.0569839477539
V
-1,0
BOT
0,16.9331166666667
V
0,23.2100486755371
V
-1,0
BOT
0,16.9397833333333
V
0,23.3969688415527
V
-1,0
BOT
0,16.94645
V
0,23.6196517944336
V
-1,0
BOT
0,16.9531166666667
V
0,23.8804817199707
V
-1,0
BOT
0,16.9597833333333
V
0,24.1827964782715
V
-1,0
BOT
0,16.96645
V
0,24.5304107666016
V
-1,0
BOT
0,16.9731166666667
V
0,24.9276161193848
V
-1,0
BOT
0,16.9797833333333
V
0,25.3791809082031
V
-1,0
BOT
0,16.98645
V
0,25.8913040161133
V
-1,0
BOT
0,16.9931166666667
V
0,26.4687538146973
V
-1,0
BOT
0,16.9997833333333
V
0,27.1167755126953
V
-1,0
BOT
0,17.00645
V
0,27.8406143188477
V
-1,0
BOT
0,17.0131166666667
V
0,28.6412239074707
V
-1,0
BOT
0,17.0197833333333
V
0,29.5195579528809
V
-1,0
BOT
0,17.02645
V
0,30.4713249206543
V
-1,0
BOT
0,17.0331166666667
V
0,31.489372253418
V
-1,0
BOT
0,17.0397833333333
V
0,32.562255859375
V
-1,0
BOT
0,17.04645
V
0,33.6737632751465
V
-1,0
BOT
0,17.0531166666667
V
0,34.8024368286133
V
-1,0
BOT
0,17.0597833333333
V
0,35.923957824707
V
-1,0
BOT
0,17.06645
V
0,37.0111465454102
V
-1,0
BOT
0,17.0731166666667
V
0,38.0349159240723
V
-1,0
BOT
0,17.0797833333333
V
0,38.9647483825684
V
-1,0
BOT
0,17.08645
V
0,39.7739410400391
V
-1,0
BOT
0,17.0931166666667
V
0,40.4386520385742
V
-1,0
BOT
0,17.0997833333333
V
0,40.9402847290039
V
-1,0
BOT
0,17.10645
V
0,41.2669181823731
V
-1,0
BOT
0,17.1131166666667
V
0,41.414737701416
V
-1,0
BOT
0,17.1197833333333
V
0,41.3880348205566
V
-1,0
BOT
0,17.12645
V
0,41.1996841430664
V
-1,0
BOT
0,17.1331166666667
V
0,40.8697128295898
V
-1,0
BOT
0,17.1397833333333
V
0,40.4243469238281
V
-1,0
BOT
0,17.14645
V
0,39.893627166748
V
-1,0
BOT
0,17.1531166666667
V
0,39.3104553222656
V
-1,0
BOT
0,17.1597833333333
V
0,38.7063026428223
V
-1,0
BOT
0,17.16645
V
0,38.1107330322266
V
-1,0
BOT
0,17.1731166666667
V
0,37.5509262084961
V
-1,0
BOT
0,17.1797833333333
V
0,37.0469093322754
V
-1,0
BOT
0,17.18645
V
0,36.613941192627
V
-1,0
BOT
0,17.1931166666667
V
0,36.2610816955566
V
-1,0
BOT
0,17.1997833333333
V
0,35.9902381896973
V
-1,0
BOT
0,17.20645
V
0,35.799503326416
V
-1,0
BOT
0,17.2131166666667
V
0,35.679817199707
V
-1,0
BOT
0,17.2197833333333
V
0,35.6206893920898
V
-1,0
BOT
0,17.22645
V
0,35.606861114502
V
-1,0
BOT
0,17.2331166666667
V
0,35.6249809265137
V
-1,0
BOT
0,17.2397833333333
V
0,35.6588363647461
V
-1,0
BOT
0,17.24645
V
0,35.6936454772949
V
-1,0
BOT
0,17.2531166666667
V
0,35.7170104980469
V
-1,0
BOT
0,17.2597833333333
V
0,35.7179641723633
V
-1,0
BOT
0,17.26645
V
0,35.6888771057129
V
-1,0
BOT
0,17.2731166666667
V
0,35.6254577636719
V
-1,0
BOT
0,17.2797833333333
V
0,35.5257987976074
V
-1,0
BOT
0,17.28645
V
0,35.3922843933105
V
-1,0
BOT
0,17.2931166666667
V
0,35.2301597595215
V
-1,0
BOT
0,17.2997833333333
V
0,35.0456237792969
V
-1,0
BOT
0,17.30645
V
0,34.8477363586426
V
-1,0
BOT
0,17.3131166666667
V
0,34.6455574035645
V
-1,0
BOT
0,17.3197833333333
V
0,34.4481468200684
V
-1,0
BOT
0,17.32645
V
0,34.2626571655273
V
-1,0
BOT
0,17.3331166666667
V
0,34.0957641601562
V
-1,0
BOT
0,17.3397833333333
V
0,33.9512825012207
V
-1,0
BOT
0,17.34645
V
0,33.8320732116699
V
-1,0
BOT
0,17.3531166666667
V
0,33.7371826171875
V
-1,0
BOT
0,17.3597833333333
V
0,33.6666107177734
V
-1,0
BOT
0,17.36645
V
0,33.6174964904785
V
-1,0
BOT
0,17.3731166666667
V
0,33.5884094238281
V
-1,0
BOT
0,17.3797833333333
V
0,33.5769653320312
V
-1,0
BOT
0,17.38645
V
0,33.5798263549805
V
-1,0
BOT
0,17.3931166666667
V
0,33.5965156555176
V
-1,0
BOT
0,17.3997833333333
V
0,33.6265563964844
V
-1,0
BOT
0,17.40645
V
0,33.6723327636719
V
-1,0
BOT
0,17.4131166666667
V
0,33.7367057800293
V
-1,0
BOT
0,17.4197833333333
V
0,33.8244438171387
V
-1,0
BOT
0,17.42645
V
0,33.940315246582
V
-1,0
BOT
0,17.4331166666667
V
0,34.090518951416
V
-1,0
BOT
0,17.4397833333333
V
0,34.2793464660645
V
-1,0
BOT
0,17.44645
V
0,34.5101356506348
V
-1,0
BOT
0,17.4531166666667
V
0,34.785270690918
V
-1,0
BOT
0,17.4597833333333
V
0,35.1042747497559
V
-1,0
BOT
0,17.46645
V
0,35.4657173156738
V
-1,0
BOT
0,17.4731166666667
V
0,35.8657836914062
V
-1,0
BOT
0,17.4797833333333
V
0,36.2997055053711
V
-1,0
BOT
0,17.48645
V
0,36.7603302001953
V
-1,0
BOT
0,17.4931166666667
V
0,37.2395515441895
V
-1,0
BOT
0,17.4997833333333
V
0,37.7297401428223
V
-1,0
BOT
0,17.50645
V
0,38.2213592529297
V
-1,0
BOT
0,17.5131166666667
V
0,38.7043952941895
V
-1,0
BOT
0,17.5197833333333
V
0,39.1707420349121
V
-1,0
BOT
0,17.52645
V
0,39.6127700805664
V
-1,0
BOT
0,17.5331166666667
V
0,40.0233268737793
V
-1,0
BOT
0,17.5397833333333
V
0,40.3990745544434
V
-1,0
BOT
0,17.54645
V
0,40.7366752624512
V
-1,0
BOT
0,17.5531166666667
V
0,41.0370826721191
V
-1,0
BOT
0,17.5597833333333
V
0,41.3026809692383
V
-1,0
BOT
0,17.56645
V
0,41.5382385253906
V
-1,0
BOT
0,17.5731166666667
V
0,41.7513847351074
V
-1,0
BOT
0,17.5797833333333
V
0,41.9521331787109
V
-1,0
BOT
0,17.58645
V
0,42.1509742736816
V
-1,0
BOT
0,17.5931166666667
V
0,42.360782623291
V
-1,0
BOT
0,17.5997833333333
V
0,42.5939559936523
V
-1,0
BOT
0,17.60645
V
0,42.8638458251953
V
-1,0
BOT
0,17.6131166666667
V
0,43.1857109069824
V
-1,0
BOT
0,17.6197833333333
V
0,43.5738563537598
V
-1,0
BOT
0,17.62645
V
0,44.0435409545898
V
-1,0
BOT
0,17.6331166666667
V
0,44.6114540100098
V
-1,0
BOT
0,17.6397833333333
V
0,45.2971458435059
V
-1,0
BOT
0,17.64645
V
0,46.1206436157227
V
-1,0
BOT
0,17.6531166666667
V
0,47.1038818359375
V
-1,0
BOT
0,17.6597833333333
V
0,48.2754707336426
V
-1,0
BOT
0,17.66645
V
0,49.6678352355957
V
-1,0
BOT
0,17.6731166666667
V
0,51.3200759887695
V
-1,0
BOT
0,17.6797833333333
V
0,53.2822608947754
V
-1,0
BOT
0,17.68645
V
0,55.6173324584961
V
-1,0
BOT
0,17.6931166666667
V
0,58.4049224853516
V
-1,0
BOT
0,17.6997833333333
V
0,61.7470741271973
V
-1,0
BOT
0,17.70645
V
0,65.7734870910645
V
-1,0
BOT
0,17.7131166666667
V
0,70.6520080566406
V
-1,0
BOT
0,17.7197833333333
V
0,76.5924453735352
V
-1,0
BOT
0,17.72645
V
0,83.8580131530762
V
-1,0
BOT
0,17.7331166666667
V
0,92.7753448486328
V
-1,0
BOT
0,17.7397833333333
V
0,103.74116897583
V
-1,0
BOT
0,17.74645
V
0,117.221355438232
V
-1,0
BOT
0,17.7531166666667
V
0,133.749961853027
V
-1,0
BOT
0,17.7597833333333
V
0,153.916358947754
V
-1,0
BOT
0,17.76645
V
0,178.346633911133
V
-1,0
BOT
0,17.7731166666667
V
0,207.667350769043
V
-1,0
BOT
0,17.7797833333333
V
0,242.464065551758
V
-1,0
BOT
0,17.78645
V
0,283.226013183594
V
-1,0
BOT
0,17.7931166666667
V
0,330.292701721191
V
-1,0
BOT
0,17.7997833333333
V
0,383.790016174316
V
-1,0
BOT
0,17.80645
V
0,443.573474884033
V
-1,0
BOT
0,17.8131166666667
V
0,509.164810180664
V
-1,0
BOT
0,17.8197833333333
V
0,579.707145690918
V
-1,0
BOT
0,17.82645
V
0,653.942584991455
V
-1,0
BOT
0,17.8331166666667
V
0,730.231285095215
V
-1,0
BOT
0,17.8397833333333
V
0,806.602954864502
V
-1,0
BOT
0,17.84645
V
0,880.830764770508
V
-1,0
BOT
0,17.8531166666667
V
0,950.535774230957
V
-1,0
BOT
0,17.8597833333333
V
0,1013.3204460144
V
-1,0
BOT
0,17.86645
V
0,1066.91789627075
V
-1,0
BOT
0,17.8731166666667
V
0,1109.32493209839
V
-1,0
BOT
0,17.8797833333333
V
0,1138.90981674194
V
-1,0
BOT
0,17.88645
V
0,1154.50954437256
V
-1,0
BOT
0,17.8931166666667
V
0,1155.50136566162
V
-1,0
BOT
0,17.8997833333333
V
0,1141.84522628784
V
-1,0
BOT
0,17.90645
V
0,1114.07327651978
V
-1,0
BOT
0,17.9131166666667
V
0,1073.24600219727
V
-1,0
BOT
0,17.9197833333333
V
0,1020.88928222656
V
-1,0
BOT
0,17.92645
V
0,958.914279937744
V
-1,0
BOT
0,17.9331166666667
V
0,889.514446258545
V
-1,0
BOT
0,17.9397833333333
V
0,815.033435821533
V
-1,0
BOT
0,17.94645
V
0,737.8249168396
V
-1,0
BOT
0,17.9531166666667
V
0,660.129547119141
V
-1,0
BOT
0,17.9597833333333
V
0,583.971977233887
V
-1,0
BOT
0,17.96645
V
0,511.077404022217
V
-1,0
BOT
0,17.9731166666667
V
0,442.811965942383
V
-1,0
BOT
0,17.9797833333333
V
0,380.156517028809
V
-1,0
BOT
0,17.98645
V
0,323.718547821045
V
-1,0
BOT
0,17.9931166666667
V
0,273.769378662109
V
-1,0
BOT
0,17.9997833333333
V
0,230.289936065674
V
-1,0
BOT
0,18.00645
V
0,193.023681640625
V
-1,0
BOT
0,18.0131166666667
V
0,161.538124084473
V
-1,0
BOT
0,18.0197833333333
V
0,135.285377502441
V
-1,0
BOT
0,18.02645
V
0,113.660335540771
V
-1,0
BOT
0,18.0331166666667
V
0,96.0474014282227
V
-1,0
BOT
0,18.0397833333333
V
0,81.8462371826172
V
-1,0
BOT
0,18.04645
V
0,70.4975128173828
V
-1,0
BOT
0,18.0531166666667
V
0,61.495304107666
V
-1,0
BOT
0,18.0597833333333
V
0,54.3975830078125
V
-1,0
BOT
0,18.06645
V
0,48.8295555114746
V
-1,0
BOT
0,18.0731166666667
V
0,44.4765090942383
V
-1,0
BOT
0,18.0797833333333
V
0,41.0819053649902
V
-1,0
BOT
0,18.08645
V
0,38.4359359741211
V
-1,0
BOT
0,18.0931166666667
V
0,36.3712310791016
V
-1,0
BOT
0,18.0997833333333
V
0,34.7552299499512
V
-1,0
BOT
0,18.10645
V
0,33.4839820861816
V
-1,0
BOT
0,18.1131166666667
V
0,32.4764251708984
V
-1,0
BOT
0,18.1197833333333
V
0,31.6696166992187
V
-1,0
BOT
0,18.12645
V
0,31.0144424438477
V
-1,0
BOT
0,18.1331166666667
V
0,30.4756164550781
V
-1,0
BOT
0,18.1397833333333
V
0,30.024528503418
V
-1,0
BOT
0,18.14645
V
0,29.6416282653809
V
-1,0
BOT
0,18.1531166666667
V
0,29.3130874633789
V
-1,0
BOT
0,18.1597833333333
V
0,29.029369354248
V
-1,0
BOT
0,18.16645
V
0,28.7866592407227
V
-1,0
BOT
0,18.1731166666667
V
0,28.5830497741699
V
-1,0
BOT
0,18.1797833333333
V
0,28.4204483032227
V
-1,0
BOT
0,18.18645
V
0,28.3031463623047
V
-1,0
BOT
0,18.1931166666667
V
0,28.2373428344727
V
-1,0
BOT
0,18.1997833333333
V
0,28.2301902770996
V
-1,0
BOT
0,18.20645
V
0,28.2902717590332
V
-1,0
BOT
0,18.2131166666667
V
0,28.4261703491211
V
-1,0
BOT
0,18.2197833333333
V
0,28.6478996276855
V
-1,0
BOT
0,18.22645
V
0,28.9649963378906
V
-1,0
BOT
0,18.2331166666667
V
0,29.3869972229004
V
-1,0
BOT
0,18.2397833333333
V
0,29.9234390258789
V
-1,0
BOT
0,18.24645
V
0,30.5829048156738
V
-1,0
BOT
0,18.2531166666667
V
0,31.3730239868164
V
-1,0
BOT
0,18.2597833333333
V
0,32.3004722595215
V
-1,0
BOT
0,18.26645
V
0,33.3690643310547
V
-1,0
BOT
0,18.2731166666667
V
0,34.5821380615234
V
-1,0
BOT
0,18.2797833333333
V
0,35.9411239624023
V
-1,0
BOT
0,18.28645
V
0,37.445068359375
V
-1,0
BOT
0,18.2931166666667
V
0,39.0896797180176
V
-1,0
BOT
0,18.2997833333333
V
0,40.8668518066406
V
-1,0
BOT
0,18.30645
V
0,42.7660942077637
V
-1,0
BOT
0,18.3131166666667
V
0,44.7702407836914
V
-1,0
BOT
0,18.3197833333333
V
0,46.8592643737793
V
-1,0
BOT
0,18.32645
V
0,49.0055084228516
V
-1,0
BOT
0,18.3331166666667
V
0,51.1794090270996
V
-1,0
BOT
0,18.3397833333333
V
0,53.3466339111328
V
-1,0
BOT
0,18.34645
V
0,55.4690361022949
V
-1,0
BOT
0,18.3531166666667
V
0,57.5065612792969
V
-1,0
BOT
0,18.3597833333333
V
0,59.417724609375
V
-1,0
BOT
0,18.36645
V
0,61.1605644226074
V
-1,0
BOT
0,18.3731166666667
V
0,62.6955032348633
V
-1,0
BOT
0,18.3797833333333
V
0,63.9834403991699
V
-1,0
BOT
0,18.38645
V
0,64.9919509887695
V
-1,0
BOT
0,18.3931166666667
V
0,65.6948089599609
V
-1,0
BOT
0,18.3997833333333
V
0,66.0743713378906
V
-1,0
BOT
0,18.40645
V
0,66.1196708679199
V
-1,0
BOT
0,18.4131166666667
V
0,65.8302307128906
V
-1,0
BOT
0,18.4197833333333
V
0,65.2146339416504
V
-1,0
BOT
0,18.42645
V
0,64.2895698547363
V
-1,0
BOT
0,18.4331166666667
V
0,63.0803108215332
V
-1,0
BOT
0,18.4397833333333
V
0,61.6178512573242
V
-1,0
BOT
0,18.44645
V
0,59.938907623291
V
-1,0
BOT
0,18.4531166666667
V
0,58.0825805664063
V
-1,0
BOT
0,18.4597833333333
V
0,56.0917854309082
V
-1,0
BOT
0,18.46645
V
0,54.0080070495606
V
-1,0
BOT
0,18.4731166666667
V
0,51.8722534179688
V
-1,0
BOT
0,18.4797833333333
V
0,49.7226715087891
V
-1,0
BOT
0,18.48645
V
0,47.5959777832031
V
-1,0
BOT
0,18.4931166666667
V
0,45.5236434936523
V
-1,0
BOT
0,18.4997833333333
V
0,43.5342788696289
V
-1,0
BOT
0,18.50645
V
0,41.6502952575684
V
-1,0
BOT
0,18.5131166666667
V
0,39.8893356323242
V
-1,0
BOT
0,18.5197833333333
V
0,38.2652282714844
V
-1,0
BOT
0,18.52645
V
0,36.7879867553711
V
-1,0
BOT
0,18.5331166666667
V
0,35.4628562927246
V
-1,0
BOT
0,18.5397833333333
V
0,34.2926979064941
V
-1,0
BOT
0,18.54645
V
0,33.2765579223633
V
-1,0
BOT
0,18.5531166666667
V
0,32.412052154541
V
-1,0
BOT
0,18.5597833333333
V
0,31.6929817199707
V
-1,0
BOT
0,18.56645
V
0,31.1131477355957
V
-1,0
BOT
0,18.5731166666667
V
0,30.6615829467773
V
-1,0
BOT
0,18.5797833333333
V
0,30.3282737731934
V
-1,0
BOT
0,18.58645
V
0,30.1017761230469
V
-1,0
BOT
0,18.5931166666667
V
0,29.9696922302246
V
-1,0
BOT
0,18.5997833333333
V
0,29.9181938171387
V
-1,0
BOT
0,18.60645
V
0,29.935359954834
V
-1,0
BOT
0,18.6131166666667
V
0,30.0064086914062
V
-1,0
BOT
0,18.6197833333333
V
0,30.1198959350586
V
-1,0
BOT
0,18.62645
V
0,30.2629470825195
V
-1,0
BOT
0,18.6331166666667
V
0,30.4231643676758
V
-1,0
BOT
0,18.6397833333333
V
0,30.5895805358887
V
-1,0
BOT
0,18.64645
V
0,30.7531356811523
V
-1,0
BOT
0,18.6531166666667
V
0,30.9047698974609
V
-1,0
BOT
0,18.6597833333333
V
0,31.0378074645996
V
-1,0
BOT
0,18.66645
V
0,31.1474800109863
V
-1,0
BOT
0,18.6731166666667
V
0,31.2309265136719
V
-1,0
BOT
0,18.6797833333333
V
0,31.2867164611816
V
-1,0
BOT
0,18.68645
V
0,31.3162803649902
V
-1,0
BOT
0,18.6931166666667
V
0,31.3234329223633
V
-1,0
BOT
0,18.6997833333333
V
0,31.3143730163574
V
-1,0
BOT
0,18.70645
V
0,31.2976837158203
V
-1,0
BOT
0,18.7131166666667
V
0,31.2843322753906
V
-1,0
BOT
0,18.7197833333333
V
0,31.2867164611816
V
-1,0
BOT
0,18.72645
V
0,31.3191413879395
V
-1,0
BOT
0,18.7331166666667
V
0,31.3963890075684
V
-1,0
BOT
0,18.7397833333333
V
0,31.5327644348145
V
-1,0
BOT
0,18.74645
V
0,31.7440032958984
V
-1,0
BOT
0,18.7531166666667
V
0,32.04345703125
V
-1,0
BOT
0,18.7597833333333
V
0,32.4420928955078
V
-1,0
BOT
0,18.76645
V
0,32.9480171203613
V
-1,0
BOT
0,18.7731166666667
V
0,33.5655212402344
V
-1,0
BOT
0,18.7797833333333
V
0,34.2941284179687
V
-1,0
BOT
0,18.78645
V
0,35.1266860961914
V
-1,0
BOT
0,18.7931166666667
V
0,36.0512733459473
V
-1,0
BOT
0,18.7997833333333
V
0,37.04833984375
V
-1,0
BOT
0,18.80645
V
0,38.0926132202148
V
-1,0
BOT
0,18.8131166666667
V
0,39.1521453857422
V
-1,0
BOT
0,18.8197833333333
V
0,40.1921272277832
V
-1,0
BOT
0,18.82645
V
0,41.1725044250488
V
-1,0
BOT
0,18.8331166666667
V
0,42.0541763305664
V
-1,0
BOT
0,18.8397833333333
V
0,42.7975654602051
V
-1,0
BOT
0,18.84645
V
0,43.3692932128906
V
-1,0
BOT
0,18.8531166666667
V
0,43.7412261962891
V
-1,0
BOT
0,18.8597833333333
V
0,43.8928604125977
V
-1,0
BOT
0,18.86645
V
0,43.8151359558106
V
-1,0
BOT
0,18.8731166666667
V
0,43.5090065002441
V
-1,0
BOT
0,18.8797833333333
V
0,42.9868698120117
V
-1,0
BOT
0,18.88645
V
0,42.2711372375488
V
-1,0
BOT
0,18.8931166666667
V
0,41.3913726806641
V
-1,0
BOT
0,18.8997833333333
V
0,40.3847694396973
V
-1,0
BOT
0,18.90645
V
0,39.2913818359375
V
-1,0
BOT
0,18.9131166666667
V
0,38.151741027832
V
-1,0
BOT
0,18.9197833333333
V
0,37.0054244995117
V
-1,0
BOT
0,18.92645
V
0,35.8867645263672
V
-1,0
BOT
0,18.9331166666667
V
0,34.825325012207
V
-1,0
BOT
0,18.9397833333333
V
0,33.8430404663086
V
-1,0
BOT
0,18.94645
V
0,32.9546928405762
V
-1,0
BOT
0,18.9531166666667
V
0,32.167911529541
V
-1,0
BOT
0,18.9597833333333
V
0,31.4836502075195
V
-1,0
BOT
0,18.96645
V
0,30.8980941772461
V
-1,0
BOT
0,18.9731166666667
V
0,30.4021835327148
V
-1,0
BOT
0,18.9797833333333
V
0,29.9844741821289
V
-1,0
BOT
0,18.98645
V
0,29.6335220336914
V
-1,0
BOT
0,18.9931166666667
V
0,29.3364524841309
V
-1,0
BOT
0,18.9997833333333
V
0,29.083251953125
V
-1,0
BOT
0,19.00645
V
0,28.862476348877
V
-1,0
BOT
0,19.0131166666667
V
0,28.6669731140137
V
-1,0
BOT
0,19.0197833333333
V
0,28.4905433654785
V
-1,0
BOT
0,19.02645
V
0,28.3284187316895
V
-1,0
BOT
0,19.0331166666667
V
0,28.1777381896973
V
-1,0
BOT
0,19.0397833333333
V
0,28.0365943908691
V
-1,0
BOT
0,19.04645
V
0,27.9054641723633
V
-1,0
BOT
0,19.0531166666667
V
0,27.7829170227051
V
-1,0
BOT
0,19.0597833333333
V
0,27.6699066162109
V
-1,0
BOT
0,19.06645
V
0,27.5659561157227
V
-1,0
BOT
0,19.0731166666667
V
0,27.472972869873
V
-1,0
BOT
0,19.0797833333333
V
0,27.3904800415039
V
-1,0
BOT
0,19.08645
V
0,27.3184776306152
V
-1,0
BOT
0,19.0931166666667
V
0,27.2583961486816
V
-1,0
BOT
0,19.0997833333333
V
0,27.2102355957031
V
-1,0
BOT
0,19.10645
V
0,27.1749496459961
V
-1,0
BOT
0,19.1131166666667
V
0,27.1530151367187
V
-1,0
BOT
0,19.1197833333333
V
0,27.1463394165039
V
-1,0
BOT
0,19.12645
V
0,27.1563529968262
V
-1,0
BOT
0,19.1331166666667
V
0,27.1854400634766
V
-1,0
BOT
0,19.1397833333333
V
0,27.2364616394043
V
-1,0
BOT
0,19.14645
V
0,27.3127555847168
V
-1,0
BOT
0,19.1531166666667
V
0,27.4162292480469
V
-1,0
BOT
0,19.1597833333333
V
0,27.5506973266602
V
-1,0
BOT
0,19.16645
V
0,27.7190208435059
V
-1,0
BOT
0,19.1731166666667
V
0,27.9231071472168
V
-1,0
BOT
0,19.1797833333333
V
0,28.1648635864258
V
-1,0
BOT
0,19.18645
V
0,28.4457206726074
V
-1,0
BOT
0,19.1931166666667
V
0,28.7666320800781
V
-1,0
BOT
0,19.1997833333333
V
0,29.1285514831543
V
-1,0
BOT
0,19.20645
V
0,29.5314788818359
V
-1,0
BOT
0,19.2131166666667
V
0,29.9758911132812
V
-1,0
BOT
0,19.2197833333333
V
0,30.4608345031738
V
-1,0
BOT
0,19.22645
V
0,30.9872627258301
V
-1,0
BOT
0,19.2331166666667
V
0,31.5532684326172
V
-1,0
BOT
0,19.2397833333333
V
0,32.1598052978516
V
-1,0
BOT
0,19.24645
V
0,32.8068733215332
V
-1,0
BOT
0,19.2531166666667
V
0,33.4949493408203
V
-1,0
BOT
0,19.2597833333333
V
0,34.2240333557129
V
-1,0
BOT
0,19.26645
V
0,34.9955558776855
V
-1,0
BOT
0,19.2731166666667
V
0,35.8114242553711
V
-1,0
BOT
0,19.2797833333333
V
0,36.6735458374023
V
-1,0
BOT
0,19.28645
V
0,37.5847816467285
V
-1,0
BOT
0,19.2931166666667
V
0,38.5479927062988
V
-1,0
BOT
0,19.2997833333333
V
0,39.5660400390625
V
-1,0
BOT
0,19.30645
V
0,40.6460762023926
V
-1,0
BOT
0,19.3131166666667
V
0,41.7947769165039
V
-1,0
BOT
0,19.3197833333333
V
0,43.0202484130859
V
-1,0
BOT
0,19.32645
V
0,44.3339347839356
V
-1,0
BOT
0,19.3331166666667
V
0,45.7510948181152
V
-1,0
BOT
0,19.3397833333333
V
0,47.2917556762695
V
-1,0
BOT
0,19.34645
V
0,48.9792823791504
V
-1,0
BOT
0,19.3531166666667
V
0,50.8437156677246
V
-1,0
BOT
0,19.3597833333333
V
0,52.9212951660156
V
-1,0
BOT
0,19.36645
V
0,55.2530288696289
V
-1,0
BOT
0,19.3731166666667
V
0,57.887077331543
V
-1,0
BOT
0,19.3797833333333
V
0,60.8763694763184
V
-1,0
BOT
0,19.38645
V
0,64.2771720886231
V
-1,0
BOT
0,19.3931166666667
V
0,68.143367767334
V
-1,0
BOT
0,19.3997833333333
V
0,72.5269317626953
V
-1,0
BOT
0,19.40645
V
0,77.4698257446289
V
-1,0
BOT
0,19.4131166666667
V
0,83.0020904541016
V
-1,0
BOT
0,19.4197833333333
V
0,89.1366004943848
V
-1,0
BOT
0,19.42645
V
0,95.8614349365234
V
-1,0
BOT
0,19.4331166666667
V
0,103.138446807861
V
-1,0
BOT
0,19.4397833333333
V
0,110.898017883301
V
-1,0
BOT
0,19.44645
V
0,119.039535522461
V
-1,0
BOT
0,19.4531166666667
V
0,127.428531646729
V
-1,0
BOT
0,19.4597833333333
V
0,135.900974273682
V
-1,0
BOT
0,19.46645
V
0,144.265651702881
V
-1,0
BOT
0,19.4731166666667
V
0,152.31466293335
V
-1,0
BOT
0,19.4797833333333
V
0,159.83247756958
V
-1,0
BOT
0,19.48645
V
0,166.608810424805
V
-1,0
BOT
0,19.4931166666667
V
0,172.450542449951
V
-1,0
BOT
0,19.4997833333333
V
0,177.191257476807
V
-1,0
BOT
0,19.50645
V
0,180.705547332764
V
-1,0
BOT
0,19.5131166666667
V
0,182.919979095459
V
-1,0
BOT
0,19.5197833333333
V
0,183.81404876709
V
-1,0
BOT
0,19.52645
V
0,183.427333831787
V
-1,0
BOT
0,19.5331166666667
V
0,181.857585906982
V
-1,0
BOT
0,19.5397833333333
V
0,179.256439208984
V
-1,0
BOT
0,19.54645
V
0,175.822257995605
V
-1,0
BOT
0,19.5531166666667
V
0,171.79012298584
V
-1,0
BOT
0,19.5597833333333
V
0,167.415142059326
V
-1,0
BOT
0,19.56645
V
0,162.961483001709
V
-1,0
BOT
0,19.5731166666667
V
0,158.685207366943
V
-1,0
BOT
0,19.5797833333333
V
0,154.821872711182
V
-1,0
BOT
0,19.58645
V
0,151.576995849609
V
-1,0
BOT
0,19.5931166666667
V
0,149.114608764648
V
-1,0
BOT
0,19.5997833333333
V
0,147.552490234375
V
-1,0
BOT
0,19.60645
V
0,146.95930480957
V
-1,0
BOT
0,19.6131166666667
V
0,147.351741790771
V
-1,0
BOT
0,19.6197833333333
V
0,148.696899414062
V
-1,0
BOT
0,19.62645
V
0,150.913238525391
V
-1,0
BOT
0,19.6331166666667
V
0,153.876781463623
V
-1,0
BOT
0,19.6397833333333
V
0,157.428741455078
V
-1,0
BOT
0,19.64645
V
0,161.379337310791
V
-1,0
BOT
0,19.6531166666667
V
0,165.519237518311
V
-1,0
BOT
0,19.6597833333333
V
0,169.626235961914
V
-1,0
BOT
0,19.66645
V
0,173.481464385986
V
-1,0
BOT
0,19.6731166666667
V
0,176.875591278076
V
-1,0
BOT
0,19.6797833333333
V
0,179.620742797852
V
-1,0
BOT
0,19.68645
V
0,181.558609008789
V
-1,0
BOT
0,19.6931166666667
V
0,182.573318481445
V
-1,0
BOT
0,19.6997833333333
V
0,182.594299316406
V
-1,0
BOT
0,19.70645
V
0,181.599617004395
V
-1,0
BOT
0,19.7131166666667
V
0,179.616451263428
V
-1,0
BOT
0,19.7197833333333
V
0,176.718711853027
V
-1,0
BOT
0,19.72645
V
0,173.02131652832
V
-1,0
BOT
0,19.7331166666667
V
0,168.670654296875
V
-1,0
BOT
0,19.7397833333333
V
0,163.835048675537
V
-1,0
BOT
0,19.74645
V
0,158.694744110107
V
-1,0
BOT
0,19.7531166666667
V
0,153.430938720703
V
-1,0
BOT
0,19.7597833333333
V
0,148.216724395752
V
-1,0
BOT
0,19.76645
V
0,143.210887908936
V
-1,0
BOT
0,19.7731166666667
V
0,138.5498046875
V
-1,0
BOT
0,19.7797833333333
V
0,134.344100952148
V
-1,0
BOT
0,19.78645
V
0,130.674839019775
V
-1,0
BOT
0,19.7931166666667
V
0,127.596855163574
V
-1,0
BOT
0,19.7997833333333
V
0,125.134468078613
V
-1,0
BOT
0,19.80645
V
0,123.288631439209
V
-1,0
BOT
0,19.8131166666667
V
0,122.036933898926
V
-1,0
BOT
0,19.8197833333333
V
0,121.341228485107
V
-1,0
BOT
0,19.82645
V
0,121.149063110352
V
-1,0
BOT
0,19.8331166666667
V
0,121.39892578125
V
-1,0
BOT
0,19.8397833333333
V
0,122.02262878418
V
-1,0
BOT
0,19.84645
V
0,122.950077056885
V
-1,0
BOT
0,19.8531166666667
V
0,124.110698699951
V
-1,0
BOT
0,19.8597833333333
V
0,125.437259674072
V
-1,0
BOT
0,19.86645
V
0,126.863479614258
V
-1,0
BOT
0,19.8731166666667
V
0,128.328800201416
V
-1,0
BOT
0,19.8797833333333
V
0,129.778861999512
V
-1,0
BOT
0,19.88645
V
0,131.163597106934
V
-1,0
BOT
0,19.8931166666667
V
0,132.44104385376
V
-1,0
BOT
0,19.8997833333333
V
0,133.575439453125
V
-1,0
BOT
0,19.90645
V
0,134.537696838379
V
-1,0
BOT
0,19.9131166666667
V
0,135.306835174561
V
-1,0
BOT
0,19.9197833333333
V
0,135.869026184082
V
-1,0
BOT
0,19.92645
V
0,136.220455169678
V
-1,0
BOT
0,19.9331166666667
V
0,136.367321014404
V
-1,0
BOT
0,19.9397833333333
V
0,136.325359344482
V
-1,0
BOT
0,19.94645
V
0,136.124610900879
V
-1,0
BOT
0,19.9531166666667
V
0,135.807514190674
V
-1,0
BOT
0,19.9597833333333
V
0,135.430335998535
V
-1,0
BOT
0,19.96645
V
0,135.063171386719
V
-1,0
BOT
0,19.9731166666667
V
0,134.790420532227
V
-1,0
BOT
0,19.9797833333333
V
0,134.707927703857
V
-1,0
BOT
0,19.98645
V
0,134.9196434021
V
-1,0
BOT
0,19.9931166666667
V
0,135.530471801758
V
-1,0
BOT
0,19.9997833333333
V
0,136.64436340332
V
-1,0
BOT
0,20.00645
V
0,138.352394104004
V
-1,0
BOT
0,20.0131166666667
V
0,140.725612640381
V
-1,0
BOT
0,20.0197833333333
V
0,143.805503845215
V
-1,0
BOT
0,20.02645
V
0,147.597312927246
V
-1,0
BOT
0,20.0331166666667
V
0,152.062892913818
V
-1,0
BOT
0,20.0397833333333
V
0,157.116413116455
V
-1,0
BOT
0,20.04645
V
0,162.62149810791
V
-1,0
BOT
0,20.0531166666667
V
0,168.392181396484
V
-1,0
BOT
0,20.0597833333333
V
0,174.198627471924
V
-1,0
BOT
0,20.06645
V
0,179.779529571533
V
-1,0
BOT
0,20.0731166666667
V
0,184.853553771973
V
-1,0
BOT
0,20.0797833333333
V
0,189.136028289795
V
-1,0
BOT
0,20.08645
V
0,192.35897064209
V
-1,0
BOT
0,20.0931166666667
V
0,194.288730621338
V
-1,0
BOT
0,20.0997833333333
V
0,194.746017456055
V
-1,0
BOT
0,20.10645
V
0,193.614959716797
V
-1,0
BOT
0,20.1131166666667
V
0,190.854549407959
V
-1,0
BOT
0,20.1197833333333
V
0,186.500549316406
V
-1,0
BOT
0,20.12645
V
0,180.663585662842
V
-1,0
BOT
0,20.1331166666667
V
0,173.519611358643
V
-1,0
BOT
0,20.1397833333333
V
0,165.298461914062
V
-1,0
BOT
0,20.14645
V
0,156.26335144043
V
-1,0
BOT
0,20.1531166666667
V
0,146.695613861084
V
-1,0
BOT
0,20.1597833333333
V
0,136.876106262207
V
-1,0
BOT
0,20.16645
V
0,127.068042755127
V
-1,0
BOT
0,20.1731166666667
V
0,117.50602722168
V
-1,0
BOT
0,20.1797833333333
V
0,108.38508605957
V
-1,0
BOT
0,20.18645
V
0,99.8544692993164
V
-1,0
BOT
0,20.1931166666667
V
0,92.0186042785645
V
-1,0
BOT
0,20.1997833333333
V
0,84.9380493164063
V
-1,0
BOT
0,20.20645
V
0,78.6337852478027
V
-1,0
BOT
0,20.2131166666667
V
0,73.0953216552734
V
-1,0
BOT
0,20.2197833333333
V
0,68.2864189147949
V
-1,0
BOT
0,20.22645
V
0,64.1536712646484
V
-1,0
BOT
0,20.2331166666667
V
0,60.6346130371094
V
-1,0
BOT
0,20.2397833333333
V
0,57.6601028442383
V
-1,0
BOT
0,20.24645
V
0,55.1614761352539
V
-1,0
BOT
0,20.2531166666667
V
0,53.0729293823242
V
-1,0
BOT
0,20.2597833333333
V
0,51.3339042663574
V
-1,0
BOT
0,20.26645
V
0,49.8909950256348
V
-1,0
BOT
0,20.2731166666667
V
0,48.698902130127
V
-1,0
BOT
0,20.2797833333333
V
0,47.7190017700195
V
-1,0
BOT
0,20.28645
V
0,46.9183921813965
V
-1,0
BOT
0,20.2931166666667
V
0,46.269416809082
V
-1,0
BOT
0,20.2997833333333
V
0,45.7491874694824
V
-1,0
BOT
0,20.30645
V
0,45.3391075134277
V
-1,0
BOT
0,20.3131166666667
V
0,45.0224876403809
V
-1,0
BOT
0,20.3197833333333
V
0,44.7845458984375
V
-1,0
BOT
0,20.32645
V
0,44.6124076843262
V
-1,0
BOT
0,20.3331166666667
V
0,44.4931983947754
V
-1,0
BOT
0,20.3397833333333
V
0,44.4169044494629
V
-1,0
BOT
0,20.34645
V
0,44.3720817565918
V
-1,0
BOT
0,20.3531166666667
V
0,44.3487167358398
V
-1,0
BOT
0,20.3597833333333
V
0,44.3367958068848
V
-1,0
BOT
0,20.36645
V
0,44.3267822265625
V
-1,0
BOT
0,20.3731166666667
V
0,44.3120002746582
V
-1,0
BOT
0,20.3797833333333
V
0,44.2838668823242
V
-1,0
BOT
0,20.38645
V
0,44.2376136779785
V
-1,0
BOT
0,20.3931166666667
V
0,44.1679954528809
V
-1,0
BOT
0,20.3997833333333
V
0,44.072151184082
V
-1,0
BOT
0,20.40645
V
0,43.9481735229492
V
-1,0
BOT
0,20.4131166666667
V
0,43.7946319580078
V
-1,0
BOT
0,20.4197833333333
V
0,43.6129570007324
V
-1,0
BOT
0,20.42645
V
0,43.4045791625977
V
-1,0
BOT
0,20.4331166666667
V
0,43.1733131408691
V
-1,0
BOT
0,20.4397833333333
V
0,42.9234504699707
V
-1,0
BOT
0,20.44645
V
0,42.6616668701172
V
-1,0
BOT
0,20.4531166666667
V
0,42.3941612243652
V
-1,0
BOT
0,20.4597833333333
V
0,42.1290397644043
V
-1,0
BOT
0,20.46645
V
0,41.8753623962402
V
-1,0
BOT
0,20.4731166666667
V
0,41.6407585144043
V
-1,0
BOT
0,20.4797833333333
V
0,41.4338111877441
V
-1,0
BOT
0,20.48645
V
0,41.2626266479492
V
-1,0
BOT
0,20.4931166666667
V
0,41.135311126709
V
-1,0
BOT
0,20.4997833333333
V
0,41.0580635070801
V
-1,0
BOT
0,20.50645
V
0,41.0380363464356
V
-1,0
BOT
0,20.5131166666667
V
0,41.0804748535156
V
-1,0
BOT
0,20.5197833333333
V
0,41.191577911377
V
-1,0
BOT
0,20.52645
V
0,41.3751602172852
V
-1,0
BOT
0,20.5331166666667
V
0,41.6355133056641
V
-1,0
BOT
0,20.5397833333333
V
0,41.9759750366211
V
-1,0
BOT
0,20.54645
V
0,42.3994064331055
V
-1,0
BOT
0,20.5531166666667
V
0,42.9091453552246
V
-1,0
BOT
0,20.5597833333333
V
0,43.5066223144531
V
-1,0
BOT
0,20.56645
V
0,44.1946983337402
V
-1,0
BOT
0,20.5731166666667
V
0,44.9752807617188
V
-1,0
BOT
0,20.5797833333333
V
0,45.8502769470215
V
-1,0
BOT
0,20.58645
V
0,46.8192100524902
V
-1,0
BOT
0,20.5931166666667
V
0,47.8801727294922
V
-1,0
BOT
0,20.5997833333333
V
0,49.0293502807617
V
-1,0
BOT
0,20.60645
V
0,50.2581596374512
V
-1,0
BOT
0,20.6131166666667
V
0,51.5532493591309
V
-1,0
BOT
0,20.6197833333333
V
0,52.8964996337891
V
-1,0
BOT
0,20.62645
V
0,54.2640686035156
V
-1,0
BOT
0,20.6331166666667
V
0,55.6254386901856
V
-1,0
BOT
0,20.6397833333333
V
0,56.9448471069336
V
-1,0
BOT
0,20.64645
V
0,58.1817626953125
V
-1,0
BOT
0,20.6531166666667
V
0,59.2927932739258
V
-1,0
BOT
0,20.6597833333333
V
0,60.2326393127441
V
-1,0
BOT
0,20.66645
V
0,60.9574317932129
V
-1,0
BOT
0,20.6731166666667
V
0,61.4256858825684
V
-1,0
BOT
0,20.6797833333333
V
0,61.6030693054199
V
-1,0
BOT
0,20.68645
V
0,61.4652633666992
V
-1,0
BOT
0,20.6931166666667
V
0,60.9960556030273
V
-1,0
BOT
0,20.6997833333333
V
0,60.1940155029297
V
-1,0
BOT
0,20.70645
V
0,59.0682029724121
V
-1,0
BOT
0,20.7131166666667
V
0,57.6410293579102
V
-1,0
BOT
0,20.7197833333333
V
0,55.9482574462891
V
-1,0
BOT
0,20.72645
V
0,54.0337562561035
V
-1,0
BOT
0,20.7331166666667
V
0,51.9490242004395
V
-1,0
BOT
0,20.7397833333333
V
0,49.7488975524902
V
-1,0
BOT
0,20.74645
V
0,47.4915504455566
V
-1,0
BOT
0,20.7531166666667
V
0,45.2332496643066
V
-1,0
BOT
0,20.7597833333333
V
0,43.0254936218262
V
-1,0
BOT
0,20.76645
V
0,40.9135818481445
V
-1,0
BOT
0,20.7731166666667
V
0,38.9347076416016
V
-1,0
BOT
0,20.7797833333333
V
0,37.1193885803223
V
-1,0
BOT
0,20.78645
V
0,35.4881286621094
V
-1,0
BOT
0,20.7931166666667
V
0,34.0518951416016
V
-1,0
BOT
0,20.7997833333333
V
0,32.8164100646973
V
-1,0
BOT
0,20.80645
V
0,31.7788124084473
V
-1,0
BOT
0,20.8131166666667
V
0,30.9333801269531
V
-1,0
BOT
0,20.8197833333333
V
0,30.2700996398926
V
-1,0
BOT
0,20.82645
V
0,29.7760963439941
V
-1,0
BOT
0,20.8331166666667
V
0,29.4375419616699
V
-1,0
BOT
0,20.8397833333333
V
0,29.2410850524902
V
-1,0
BOT
0,20.84645
V
0,29.1743278503418
V
-1,0
BOT
0,20.8531166666667
V
0,29.2253494262695
V
-1,0
BOT
0,20.8597833333333
V
0,29.383659362793
V
-1,0
BOT
0,20.86645
V
0,29.6416282653809
V
-1,0
BOT
0,20.8731166666667
V
0,29.991626739502
V
-1,0
BOT
0,20.8797833333333
V
0,30.4269790649414
V
-1,0
BOT
0,20.88645
V
0,30.9433937072754
V
-1,0
BOT
0,20.8931166666667
V
0,31.5351486206055
V
-1,0
BOT
0,20.8997833333333
V
0,32.198429107666
V
-1,0
BOT
0,20.90645
V
0,32.926082611084
V
-1,0
BOT
0,20.9131166666667
V
0,33.7119102478027
V
-1,0
BOT
0,20.9197833333333
V
0,34.548282623291
V
-1,0
BOT
0,20.92645
V
0,35.4256629943848
V
-1,0
BOT
0,20.9331166666667
V
0,36.3330841064453
V
-1,0
BOT
0,20.9397833333333
V
0,37.2586250305176
V
-1,0
BOT
0,20.94645
V
0,38.1884574890137
V
-1,0
BOT
0,20.9531166666667
V
0,39.1097068786621
V
-1,0
BOT
0,20.9597833333333
V
0,40.0080680847168
V
-1,0
BOT
0,20.96645
V
0,40.8706665039063
V
-1,0
BOT
0,20.9731166666667
V
0,41.6855812072754
V
-1,0
BOT
0,20.9797833333333
V
0,42.4418449401856
V
-1,0
BOT
0,20.98645
V
0,43.1327819824219
V
-1,0
BOT
0,20.9931166666667
V
0,43.7536239624023
V
-1,0
BOT
0,20.9997833333333
V
0,44.3034172058106
V
-1,0
BOT
0,21.00645
V
0,44.7850227355957
V
-1,0
BOT
0,21.0131166666667
V
0,45.2055931091309
V
-1,0
BOT
0,21.0197833333333
V
0,45.5746650695801
V
-1,0
BOT
0,21.02645
V
0,45.9046363830566
V
-1,0
BOT
0,21.0331166666667
V
0,46.2112426757813
V
-1,0
BOT
0,21.0397833333333
V
0,46.5106964111328
V
-1,0
BOT
0,21.04645
V
0,46.8182563781738
V
-1,0
BOT
0,21.0531166666667
V
0,47.1487045288086
V
-1,0
BOT
0,21.0597833333333
V
0,47.5168228149414
V
-1,0
BOT
0,21.06645
V
0,47.9335784912109
V
-1,0
BOT
0,21.0731166666667
V
0,48.4075546264648
V
-1,0
BOT
0,21.0797833333333
V
0,48.9420890808106
V
-1,0
BOT
0,21.08645
V
0,49.5386123657227
V
-1,0
BOT
0,21.0931166666667
V
0,50.1952171325684
V
-1,0
BOT
0,21.0997833333333
V
0,50.9052276611328
V
-1,0
BOT
0,21.10645
V
0,51.6600608825684
V
-1,0
BOT
0,21.1131166666667
V
0,52.4468421936035
V
-1,0
BOT
0,21.1197833333333
V
0,53.2541275024414
V
-1,0
BOT
0,21.12645
V
0,54.0661811828613
V
-1,0
BOT
0,21.1331166666667
V
0,54.8696517944336
V
-1,0
BOT
0,21.1397833333333
V
0,55.6516647338867
V
-1,0
BOT
0,21.14645
V
0,56.3998222351074
V
-1,0
BOT
0,21.1531166666667
V
0,57.1045875549316
V
-1,0
BOT
0,21.1597833333333
V
0,57.7578544616699
V
-1,0
BOT
0,21.16645
V
0,58.3562850952148
V
-1,0
BOT
0,21.1731166666667
V
0,58.89892578125
V
-1,0
BOT
0,21.1797833333333
V
0,59.3900680541992
V
-1,0
BOT
0,21.18645
V
0,59.8382949829102
V
-1,0
BOT
0,21.1931166666667
V
0,60.2569580078125
V
-1,0
BOT
0,21.1997833333333
V
0,60.6646537780762
V
-1,0
BOT
0,21.20645
V
0,61.0842704772949
V
-1,0
BOT
0,21.2131166666667
V
0,61.5439414978027
V
-1,0
BOT
0,21.2197833333333
V
0,62.0737075805664
V
-1,0
BOT
0,21.22645
V
0,62.7079010009766
V
-1,0
BOT
0,21.2331166666667
V
0,63.481330871582
V
-1,0
BOT
0,21.2397833333333
V
0,64.4297599792481
V
-1,0
BOT
0,21.24645
V
0,65.5860900878906
V
-1,0
BOT
0,21.2531166666667
V
0,66.9808387756348
V
-1,0
BOT
0,21.2597833333333
V
0,68.6373710632324
V
-1,0
BOT
0,21.26645
V
0,70.5728530883789
V
-1,0
BOT
0,21.2731166666667
V
0,72.7925300598145
V
-1,0
BOT
0,21.2797833333333
V
0,75.2921104431152
V
-1,0
BOT
0,21.28645
V
0,78.0549049377441
V
-1,0
BOT
0,21.2931166666667
V
0,81.0503959655762
V
-1,0
BOT
0,21.2997833333333
V
0,84.233283996582
V
-1,0
BOT
0,21.30645
V
0,87.5444412231445
V
-1,0
BOT
0,21.3131166666667
V
0,90.914249420166
V
-1,0
BOT
0,21.3197833333333
V
0,94.2645072937012
V
-1,0
BOT
0,21.32645
V
0,97.5089073181152
V
-1,0
BOT
0,21.3331166666667
V
0,100.560665130615
V
-1,0
BOT
0,21.3397833333333
V
0,103.336334228516
V
-1,0
BOT
0,21.34645
V
0,105.762004852295
V
-1,0
BOT
0,21.3531166666667
V
0,107.774257659912
V
-1,0
BOT
0,21.3597833333333
V
0,109.323978424072
V
-1,0
BOT
0,21.36645
V
0,110.381603240967
V
-1,0
BOT
0,21.3731166666667
V
0,110.935688018799
V
-1,0
BOT
0,21.3797833333333
V
0,110.995769500732
V
-1,0
BOT
0,21.38645
V
0,110.589504241943
V
-1,0
BOT
0,21.3931166666667
V
0,109.762668609619
V
-1,0
BOT
0,21.3997833333333
V
0,108.574867248535
V
-1,0
BOT
0,21.40645
V
0,107.097148895264
V
-1,0
BOT
0,21.4131166666667
V
0,105.408668518066
V
-1,0
BOT
0,21.4197833333333
V
0,103.590488433838
V
-1,0
BOT
0,21.42645
V
0,101.722717285156
V
-1,0
BOT
0,21.4331166666667
V
0,99.8802185058594
V
-1,0
BOT
0,21.4397833333333
V
0,98.1307029724121
V
-1,0
BOT
0,21.44645
V
0,96.531867980957
V
-1,0
BOT
0,21.4531166666667
V
0,95.1290130615234
V
-1,0
BOT
0,21.4597833333333
V
0,93.9555168151856
V
-1,0
BOT
0,21.46645
V
0,93.0328369140625
V
-1,0
BOT
0,21.4731166666667
V
0,92.3709869384766
V
-1,0
BOT
0,21.4797833333333
V
0,91.9680595397949
V
-1,0
BOT
0,21.48645
V
0,91.8121337890625
V
-1,0
BOT
0,21.4931166666667
V
0,91.8827056884766
V
-1,0
BOT
0,21.4997833333333
V
0,92.1530723571777
V
-1,0
BOT
0,21.50645
V
0,92.5874710083008
V
-1,0
BOT
0,21.5131166666667
V
0,93.1468009948731
V
-1,0
BOT
0,21.5197833333333
V
0,93.7881469726563
V
-1,0
BOT
0,21.52645
V
0,94.4652557373047
V
-1,0
BOT
0,21.5331166666667
V
0,95.1323509216309
V
-1,0
BOT
0,21.5397833333333
V
0,95.7427024841309
V
-1,0
BOT
0,21.54645
V
0,96.254825592041
V
-1,0
BOT
0,21.5531166666667
V
0,96.6286659240723
V
-1,0
BOT
0,21.5597833333333
V
0,96.832275390625
V
-1,0
BOT
0,21.56645
V
0,96.8403816223145
V
-1,0
BOT
0,21.5731166666667
V
0,96.6358184814453
V
-1,0
BOT
0,21.5797833333333
V
0,96.2119102478027
V
-1,0
BOT
0,21.58645
V
0,95.5696105957031
V
-1,0
BOT
0,21.5931166666667
V
0,94.7208404541016
V
-1,0
BOT
0,21.5997833333333
V
0,93.6856269836426
V
-1,0
BOT
0,21.60645
V
0,92.4906730651856
V
-1,0
BOT
0,21.6131166666667
V
0,91.1674499511719
V
-1,0
BOT
0,21.6197833333333
V
0,89.7526741027832
V
-1,0
BOT
0,21.62645
V
0,88.282585144043
V
-1,0
BOT
0,21.6331166666667
V
0,86.7934226989746
V
-1,0
BOT
0,21.6397833333333
V
0,85.319995880127
V
-1,0
BOT
0,21.64645
V
0,83.8918685913086
V
-1,0
BOT
0,21.6531166666667
V
0,82.5343132019043
V
-1,0
BOT
0,21.6597833333333
V
0,81.2668800354004
V
-1,0
BOT
0,21.66645
V
0,80.1043510437012
V
-1,0
BOT
0,21.6731166666667
V
0,79.0548324584961
V
-1,0
BOT
0,21.6797833333333
V
0,78.122615814209
V
-1,0
BOT
0,21.68645
V
0,77.3067474365234
V
-1,0
BOT
0,21.6931166666667
V
0,76.6043663024902
V
-1,0
BOT
0,21.6997833333333
V
0,76.0092735290527
V
-1,0
BOT
0,21.70645
V
0,75.5124092102051
V
-1,0
BOT
0,21.7131166666667
V
0,75.1047134399414
V
-1,0
BOT
0,21.7197833333333
V
0,74.7752189636231
V
-1,0
BOT
0,21.72645
V
0,74.5148658752441
V
-1,0
BOT
0,21.7331166666667
V
0,74.3131637573242
V
-1,0
BOT
0,21.7397833333333
V
0,74.1591453552246
V
-1,0
BOT
0,21.74645
V
0,74.0423202514648
V
-1,0
BOT
0,21.7531166666667
V
0,73.9541053771973
V
-1,0
BOT
0,21.7597833333333
V
0,73.8840103149414
V
-1,0
BOT
0,21.76645
V
0,73.822021484375
V
-1,0
BOT
0,21.7731166666667
V
0,73.758602142334
V
-1,0
BOT
0,21.7797833333333
V
0,73.6861228942871
V
-1,0
BOT
0,21.78645
V
0,73.5955238342285
V
-1,0
BOT
0,21.7931166666667
V
0,73.4806060791016
V
-1,0
BOT
0,21.7997833333333
V
0,73.3346939086914
V
-1,0
BOT
0,21.80645
V
0,73.155403137207
V
-1,0
BOT
0,21.8131166666667
V
0,72.9408264160156
V
-1,0
BOT
0,21.8197833333333
V
0,72.6938247680664
V
-1,0
BOT
0,21.82645
V
0,72.418212890625
V
-1,0
BOT
0,21.8331166666667
V
0,72.1230506896973
V
-1,0
BOT
0,21.8397833333333
V
0,71.8183517456055
V
-1,0
BOT
0,21.84645
V
0,71.5169906616211
V
-1,0
BOT
0,21.8531166666667
V
0,71.2323188781738
V
-1,0
BOT
0,21.8597833333333
V
0,70.9800720214844
V
-1,0
BOT
0,21.86645
V
0,70.7740783691406
V
-1,0
BOT
0,21.8731166666667
V
0,70.6276893615723
V
-1,0
BOT
0,21.8797833333333
V
0,70.5533027648926
V
-1,0
BOT
0,21.88645
V
0,70.5580711364746
V
-1,0
BOT
0,21.8931166666667
V
0,70.6472396850586
V
-1,0
BOT
0,21.8997833333333
V
0,70.8203315734863
V
-1,0
BOT
0,21.90645
V
0,71.0735321044922
V
-1,0
BOT
0,21.9131166666667
V
0,71.3963508605957
V
-1,0
BOT
0,21.9197833333333
V
0,71.7759132385254
V
-1,0
BOT
0,21.92645
V
0,72.1921920776367
V
-1,0
BOT
0,21.9331166666667
V
0,72.6242065429688
V
-1,0
BOT
0,21.9397833333333
V
0,73.0457305908203
V
-1,0
BOT
0,21.94645
V
0,73.4295845031738
V
-1,0
BOT
0,21.9531166666667
V
0,73.7462043762207
V
-1,0
BOT
0,21.9597833333333
V
0,73.9645957946777
V
-1,0
BOT
0,21.96645
V
0,74.0571022033691
V
-1,0
BOT
0,21.9731166666667
V
0,73.9965438842773
V
-1,0
BOT
0,21.9797833333333
V
0,73.7614631652832
V
-1,0
BOT
0,21.98645
V
0,73.3342170715332
V
-1,0
BOT
0,21.9931166666667
V
0,72.7038383483887
V
-1,0
BOT
0,21.9997833333333
V
0,71.8674659729004
V
-1,0
BOT
0,22.00645
V
0,70.828914642334
V
-1,0
BOT
0,22.0131166666667
V
0,69.6010589599609
V
-1,0
BOT
0,22.0197833333333
V
0,68.2034492492676
V
-1,0
BOT
0,22.02645
V
0,66.6632652282715
V
-1,0
BOT
0,22.0331166666667
V
0,65.0119781494141
V
-1,0
BOT
0,22.0397833333333
V
0,63.2872581481934
V
-1,0
BOT
0,22.04645
V
0,61.5267753601074
V
-1,0
BOT
0,22.0531166666667
V
0,59.7691535949707
V
-1,0
BOT
0,22.0597833333333
V
0,58.0520629882813
V
-1,0
BOT
0,22.06645
V
0,56.4098358154297
V
-1,0
BOT
0,22.0731166666667
V
0,54.872989654541
V
-1,0
BOT
0,22.0797833333333
V
0,53.4648895263672
V
-1,0
BOT
0,22.08645
V
0,52.2050857543945
V
-1,0
BOT
0,22.0931166666667
V
0,51.1064529418945
V
-1,0
BOT
0,22.0997833333333
V
0,50.1766204833984
V
-1,0
BOT
0,22.10645
V
0,49.4160652160645
V
-1,0
BOT
0,22.1131166666667
V
0,48.820972442627
V
-1,0
BOT
0,22.1197833333333
V
0,48.3827590942383
V
-1,0
BOT
0,22.12645
V
0,48.0904579162598
V
-1,0
BOT
0,22.1331166666667
V
0,47.9283332824707
V
-1,0
BOT
0,22.1397833333333
V
0,47.8806495666504
V
-1,0
BOT
0,22.14645
V
0,47.9292869567871
V
-1,0
BOT
0,22.1531166666667
V
0,48.0561256408691
V
-1,0
BOT
0,22.1597833333333
V
0,48.2425689697266
V
-1,0
BOT
0,22.16645
V
0,48.4700202941895
V
-1,0
BOT
0,22.1731166666667
V
0,48.7198829650879
V
-1,0
BOT
0,22.1797833333333
V
0,48.9749908447266
V
-1,0
BOT
0,22.18645
V
0,49.2172241210938
V
-1,0
BOT
0,22.1931166666667
V
0,49.4308471679688
V
-1,0
BOT
0,22.1997833333333
V
0,49.6015548706055
V
-1,0
BOT
0,22.20645
V
0,49.7159957885742
V
-1,0
BOT
0,22.2131166666667
V
0,49.7627258300781
V
-1,0
BOT
0,22.2197833333333
V
0,49.7336387634277
V
-1,0
BOT
0,22.22645
V
0,49.6234893798828
V
-1,0
BOT
0,22.2331166666667
V
0,49.4289398193359
V
-1,0
BOT
0,22.2397833333333
V
0,49.1490364074707
V
-1,0
BOT
0,22.24645
V
0,48.7871170043945
V
-1,0
BOT
0,22.2531166666667
V
0,48.3484268188477
V
-1,0
BOT
0,22.2597833333333
V
0,47.8420257568359
V
-1,0
BOT
0,22.26645
V
0,47.2774505615234
V
-1,0
BOT
0,22.2731166666667
V
0,46.6670989990234
V
-1,0
BOT
0,22.2797833333333
V
0,46.0257530212402
V
-1,0
BOT
0,22.28645
V
0,45.3677177429199
V
-1,0
BOT
0,22.2931166666667
V
0,44.7072982788086
V
-1,0
BOT
0,22.2997833333333
V
0,44.0592765808106
V
-1,0
BOT
0,22.30645
V
0,43.4365272521973
V
-1,0
BOT
0,22.3131166666667
V
0,42.8504943847656
V
-1,0
BOT
0,22.3197833333333
V
0,42.3121452331543
V
-1,0
BOT
0,22.32645
V
0,41.8295860290527
V
-1,0
BOT
0,22.3331166666667
V
0,41.407585144043
V
-1,0
BOT
0,22.3397833333333
V
0,41.050910949707
V
-1,0
BOT
0,22.34645
V
0,40.7619476318359
V
-1,0
BOT
0,22.3531166666667
V
0,40.5406951904297
V
-1,0
BOT
0,22.3597833333333
V
0,40.3861999511719
V
-1,0
BOT
0,22.36645
V
0,40.2951240539551
V
-1,0
BOT
0,22.3731166666667
V
0,40.2650833129883
V
-1,0
BOT
0,22.3797833333333
V
0,40.2908325195313
V
-1,0
BOT
0,22.38645
V
0,40.3671264648438
V
-1,0
BOT
0,22.3931166666667
V
0,40.4882431030273
V
-1,0
BOT
0,22.3997833333333
V
0,40.6475067138672
V
-1,0
BOT
0,22.40645
V
0,40.8377647399902
V
-1,0
BOT
0,22.4131166666667
V
0,41.0537719726563
V
-1,0
BOT
0,22.4197833333333
V
0,41.2888526916504
V
-1,0
BOT
0,22.42645
V
0,41.5372848510742
V
-1,0
BOT
0,22.4331166666667
V
0,41.7938232421875
V
-1,0
BOT
0,22.4397833333333
V
0,42.0541763305664
V
-1,0
BOT
0,22.44645
V
0,42.3145294189453
V
-1,0
BOT
0,22.4531166666667
V
0,42.5705909729004
V
-1,0
BOT
0,22.4597833333333
V
0,42.8204536437988
V
-1,0
BOT
0,22.46645
V
0,43.0607795715332
V
-1,0
BOT
0,22.4731166666667
V
0,43.2910919189453
V
-1,0
BOT
0,22.4797833333333
V
0,43.5104370117188
V
-1,0
BOT
0,22.48645
V
0,43.7192916870117
V
-1,0
BOT
0,22.4931166666667
V
0,43.9176559448242
V
-1,0
BOT
0,22.4997833333333
V
0,44.1064834594727
V
-1,0
BOT
0,22.50645
V
0,44.2862510681152
V
-1,0
BOT
0,22.5131166666667
V
0,44.4583892822266
V
-1,0
BOT
0,22.5197833333333
V
0,44.621467590332
V
-1,0
BOT
0,22.52645
V
0,44.7754859924316
V
-1,0
BOT
0,22.5331166666667
V
0,44.919490814209
V
-1,0
BOT
0,22.5397833333333
V
0,45.0506210327148
V
-1,0
BOT
0,22.54645
V
0,45.1664924621582
V
-1,0
BOT
0,22.5531166666667
V
0,45.2647209167481
V
-1,0
BOT
0,22.5597833333333
V
0,45.341968536377
V
-1,0
BOT
0,22.56645
V
0,45.3968048095703
V
-1,0
BOT
0,22.5731166666667
V
0,45.4273223876953
V
-1,0
BOT
0,22.5797833333333
V
0,45.4320907592773
V
-1,0
BOT
0,22.58645
V
0,45.4134941101074
V
-1,0
BOT
0,22.5931166666667
V
0,45.3734397888184
V
-1,0
BOT
0,22.5997833333333
V
0,45.3171730041504
V
-1,0
BOT
0,22.60645
V
0,45.2508926391602
V
-1,0
BOT
0,22.6131166666667
V
0,45.1831817626953
V
-1,0
BOT
0,22.6197833333333
V
0,45.1245307922363
V
-1,0
BOT
0,22.62645
V
0,45.0873374938965
V
-1,0
BOT
0,22.6331166666667
V
0,45.0830459594727
V
-1,0
BOT
0,22.6397833333333
V
0,45.1231002807617
V
-1,0
BOT
0,22.64645
V
0,45.219898223877
V
-1,0
BOT
0,22.6531166666667
V
0,45.3839302062988
V
-1,0
BOT
0,22.6597833333333
V
0,45.6247329711914
V
-1,0
BOT
0,22.66645
V
0,45.9480285644531
V
-1,0
BOT
0,22.6731166666667
V
0,46.3595390319824
V
-1,0
BOT
0,22.6797833333333
V
0,46.8616485595703
V
-1,0
BOT
0,22.68645
V
0,47.4543571472168
V
-1,0
BOT
0,22.6931166666667
V
0,48.1328964233398
V
-1,0
BOT
0,22.6997833333333
V
0,48.8905906677246
V
-1,0
BOT
0,22.70645
V
0,49.7188568115234
V
-1,0
BOT
0,22.7131166666667
V
0,50.6062507629395
V
-1,0
BOT
0,22.7197833333333
V
0,51.539421081543
V
-1,0
BOT
0,22.72645
V
0,52.5031089782715
V
-1,0
BOT
0,22.7331166666667
V
0,53.4825325012207
V
-1,0
BOT
0,22.7397833333333
V
0,54.4619560241699
V
-1,0
BOT
0,22.74645
V
0,55.4251670837402
V
-1,0
BOT
0,22.7531166666667
V
0,56.3564300537109
V
-1,0
BOT
0,22.7597833333333
V
0,57.2409629821777
V
-1,0
BOT
0,22.76645
V
0,58.0649375915527
V
-1,0
BOT
0,22.7731166666667
V
0,58.8169097900391
V
-1,0
BOT
0,22.7797833333333
V
0,59.4859123229981
V
-1,0
BOT
0,22.78645
V
0,60.0647926330566
V
-1,0
BOT
0,22.7931166666667
V
0,60.5483055114746
V
-1,0
BOT
0,22.7997833333333
V
0,60.9321594238281
V
-1,0
BOT
0,22.80645
V
0,61.2154006958008
V
-1,0
BOT
0,22.8131166666667
V
0,61.3999366760254
V
-1,0
BOT
0,22.8197833333333
V
0,61.4900588989258
V
-1,0
BOT
0,22.82645
V
0,61.4919662475586
V
-1,0
BOT
0,22.8331166666667
V
0,61.4142417907715
V
-1,0
BOT
0,22.8397833333333
V
0,61.2678527832031
V
-1,0
BOT
0,22.84645
V
0,61.0666275024414
V
-1,0
BOT
0,22.8531166666667
V
0,60.8248710632324
V
-1,0
BOT
0,22.8597833333333
V
0,60.5587959289551
V
-1,0
BOT
0,22.86645
V
0,60.2850914001465
V
-1,0
BOT
0,22.8731166666667
V
0,60.020923614502
V
-1,0
BOT
0,22.8797833333333
V
0,59.7820281982422
V
-1,0
BOT
0,22.88645
V
0,59.5831871032715
V
-1,0
BOT
0,22.8931166666667
V
0,59.4353675842285
V
-1,0
BOT
0,22.8997833333333
V
0,59.3485832214356
V
-1,0
BOT
0,22.90645
V
0,59.3271255493164
V
-1,0
BOT
0,22.9131166666667
V
0,59.3724250793457
V
-1,0
BOT
0,22.9197833333333
V
0,59.4806671142578
V
-1,0
BOT
0,22.92645
V
0,59.6446990966797
V
-1,0
BOT
0,22.9331166666667
V
0,59.8535537719727
V
-1,0
BOT
0,22.9397833333333
V
0,60.091495513916
V
-1,0
BOT
0,22.94645
V
0,60.3408813476563
V
-1,0
BOT
0,22.9531166666667
V
0,60.5816841125488
V
-1,0
BOT
0,22.9597833333333
V
0,60.7943534851074
V
-1,0
BOT
0,22.96645
V
0,60.9598159790039
V
-1,0
BOT
0,22.9731166666667
V
0,61.0604286193848
V
-1,0
BOT
0,22.9797833333333
V
0,61.0818862915039
V
-1,0
BOT
0,22.98645
V
0,61.0146522521973
V
-1,0
BOT
0,22.9931166666667
V
0,60.8534812927246
V
-1,0
BOT
0,22.9997833333333
V
0,60.5978965759277
V
-1,0
BOT
0,23.00645
V
0,60.2512359619141
V
-1,0
BOT
0,23.0131166666667
V
0,59.8225593566895
V
-1,0
BOT
0,23.0197833333333
V
0,59.3228340148926
V
-1,0
BOT
0,23.02645
V
0,58.7668418884277
V
-1,0
BOT
0,23.0331166666667
V
0,58.1703186035156
V
-1,0
BOT
0,23.0397833333333
V
0,57.548999786377
V
-1,0
BOT
0,23.04645
V
0,56.9181442260742
V
-1,0
BOT
0,23.0531166666667
V
0,56.2906265258789
V
-1,0
BOT
0,23.0597833333333
V
0,55.6769371032715
V
-1,0
BOT
0,23.06645
V
0,55.086612701416
V
-1,0
BOT
0,23.0731166666667
V
0,54.5248985290527
V
-1,0
BOT
0,23.0797833333333
V
0,53.9946556091309
V
-1,0
BOT
0,23.08645
V
0,53.4968376159668
V
-1,0
BOT
0,23.0931166666667
V
0,53.0309677124023
V
-1,0
BOT
0,23.0997833333333
V
0,52.5937080383301
V
-1,0
BOT
0,23.10645
V
0,52.182674407959
V
-1,0
BOT
0,23.1131166666667
V
0,51.7954826354981
V
-1,0
BOT
0,23.1197833333333
V
0,51.4307022094727
V
-1,0
BOT
0,23.12645
V
0,51.08642578125
V
-1,0
BOT
0,23.1331166666667
V
0,50.7636070251465
V
-1,0
BOT
0,23.1397833333333
V
0,50.4636764526367
V
-1,0
BOT
0,23.14645
V
0,50.1894950866699
V
-1,0
BOT
0,23.1531166666667
V
0,49.9448776245117
V
-1,0
BOT
0,23.1597833333333
V
0,49.7336387634277
V
-1,0
BOT
0,23.16645
V
0,49.5615005493164
V
-1,0
BOT
0,23.1731166666667
V
0,49.4341850280762
V
-1,0
BOT
0,23.1797833333333
V
0,49.3559837341309
V
-1,0
BOT
0,23.18645
V
0,49.3302345275879
V
-1,0
BOT
0,23.1931166666667
V
0,49.3607521057129
V
-1,0
BOT
0,23.1997833333333
V
0,49.4470596313477
V
-1,0
BOT
0,23.20645
V
0,49.5891571044922
V
-1,0
BOT
0,23.2131166666667
V
0,49.7827529907227
V
-1,0
BOT
0,23.2197833333333
V
0,50.0235557556152
V
-1,0
BOT
0,23.22645
V
0,50.3044128417969
V
-1,0
BOT
0,23.2331166666667
V
0,50.6157875061035
V
-1,0
BOT
0,23.2397833333333
V
0,50.9467124938965
V
-1,0
BOT
0,23.24645
V
0,51.2862205505371
V
-1,0
BOT
0,23.2531166666667
V
0,51.6219139099121
V
-1,0
BOT
0,23.2597833333333
V
0,51.94091796875
V
-1,0
BOT
0,23.26645
V
0,52.2327423095703
V
-1,0
BOT
0,23.2731166666667
V
0,52.4864196777344
V
-1,0
BOT
0,23.2797833333333
V
0,52.6919364929199
V
-1,0
BOT
0,23.28645
V
0,52.8426170349121
V
-1,0
BOT
0,23.2931166666667
V
0,52.9332160949707
V
-1,0
BOT
0,23.2997833333333
V
0,52.9599189758301
V
-1,0
BOT
0,23.30645
V
0,52.9212951660156
V
-1,0
BOT
0,23.3131166666667
V
0,52.8173446655273
V
-1,0
BOT
0,23.3197833333333
V
0,52.6504516601563
V
-1,0
BOT
0,23.32645
V
0,52.4239540100098
V
-1,0
BOT
0,23.3331166666667
V
0,52.1440505981445
V
-1,0
BOT
0,23.3397833333333
V
0,51.816463470459
V
-1,0
BOT
0,23.34645
V
0,51.450252532959
V
-1,0
BOT
0,23.3531166666667
V
0,51.053524017334
V
-1,0
BOT
0,23.3597833333333
V
0,50.6348609924316
V
-1,0
BOT
0,23.36645
V
0,50.2028465270996
V
-1,0
BOT
0,23.3731166666667
V
0,49.7674942016602
V
-1,0
BOT
0,23.3797833333333
V
0,49.3373870849609
V
-1,0
BOT
0,23.38645
V
0,48.9206314086914
V
-1,0
BOT
0,23.3931166666667
V
0,48.5243797302246
V
-1,0
BOT
0,23.3997833333333
V
0,48.1576919555664
V
-1,0
BOT
0,23.40645
V
0,47.8253364562988
V
-1,0
BOT
0,23.4131166666667
V
0,47.5330352783203
V
-1,0
BOT
0,23.4197833333333
V
0,47.2836494445801
V
-1,0
BOT
0,23.42645
V
0,47.0790863037109
V
-1,0
BOT
0,23.4331166666667
V
0,46.9193458557129
V
-1,0
BOT
0,23.4397833333333
V
0,46.8020439147949
V
-1,0
BOT
0,23.44645
V
0,46.724796295166
V
-1,0
BOT
0,23.4531166666667
V
0,46.6823577880859
V
-1,0
BOT
0,23.4597833333333
V
0,46.6690063476563
V
-1,0
BOT
0,23.46645
V
0,46.6761589050293
V
-1,0
BOT
0,23.4731166666667
V
0,46.6952323913574
V
-1,0
BOT
0,23.4797833333333
V
0,46.7166900634766
V
-1,0
BOT
0,23.48645
V
0,46.7319488525391
V
-1,0
BOT
0,23.4931166666667
V
0,46.7309951782227
V
-1,0
BOT
0,23.4997833333333
V
0,46.7047691345215
V
-1,0
BOT
0,23.50645
V
0,46.6451644897461
V
-1,0
BOT
0,23.5131166666667
V
0,46.5469360351563
V
-1,0
BOT
0,23.5197833333333
V
0,46.4038848876953
V
-1,0
BOT
0,23.52645
V
0,46.2131500244141
V
-1,0
BOT
0,23.5331166666667
V
0,45.9718704223633
V
-1,0
BOT
0,23.5397833333333
V
0,45.6795692443848
V
-1,0
BOT
0,23.54645
V
0,45.3367233276367
V
-1,0
BOT
0,23.5531166666667
V
0,44.945240020752
V
-1,0
BOT
0,23.5597833333333
V
0,44.5079803466797
V
-1,0
BOT
0,23.56645
V
0,44.0282821655273
V
-1,0
BOT
0,23.5731166666667
V
0,43.5118675231934
V
-1,0
BOT
0,23.5797833333333
V
0,42.9635047912598
V
-1,0
BOT
0,23.58645
V
0,42.3903465270996
V
-1,0
BOT
0,23.5931166666667
V
0,41.7976379394531
V
-1,0
BOT
0,23.5997833333333
V
0,41.1925315856934
V
-1,0
BOT
0,23.60645
V
0,40.5817031860352
V
-1,0
BOT
0,23.6131166666667
V
0,39.9718284606934
V
-1,0
BOT
0,23.6197833333333
V
0,39.3681526184082
V
-1,0
BOT
0,23.62645
V
0,38.7773513793945
V
-1,0
BOT
0,23.6331166666667
V
0,38.2046699523926
V
-1,0
BOT
0,23.6397833333333
V
0,37.653923034668
V
-1,0
BOT
0,23.64645
V
0,37.1289253234863
V
-1,0
BOT
0,23.6531166666667
V
0,36.6325378417969
V
-1,0
BOT
0,23.6597833333333
V
0,36.1690521240234
V
-1,0
BOT
0,23.66645
V
0,35.738468170166
V
-1,0
BOT
0,23.6731166666667
V
0,35.3436470031738
V
-1,0
BOT
0,23.6797833333333
V
0,34.9841117858887
V
-1,0
BOT
0,23.68645
V
0,34.660816192627
V
-1,0
BOT
0,23.6931166666667
V
0,34.3728065490723
V
-1,0
BOT
0,23.6997833333333
V
0,34.1205596923828
V
-1,0
BOT
0,23.70645
V
0,33.902645111084
V
-1,0
BOT
0,23.7131166666667
V
0,33.7181091308594
V
-1,0
BOT
0,23.7197833333333
V
0,33.5655212402344
V
-1,0
BOT
0,23.72645
V
0,33.4439277648926
V
-1,0
BOT
0,23.7331166666667
V
0,33.3523750305176
V
-1,0
BOT
0,23.7397833333333
V
0,33.2903861999512
V
-1,0
BOT
0,23.74645
V
0,33.2584381103516
V
-1,0
BOT
0,23.7531166666667
V
0,33.259391784668
V
-1,0
BOT
0,23.7597833333333
V
0,33.2980155944824
V
-1,0
BOT
0,23.76645
V
0,33.3795547485352
V
-1,0
BOT
0,23.7731166666667
V
0,33.5116386413574
V
-1,0
BOT
0,23.7797833333333
V
0,33.7038040161133
V
-1,0
BOT
0,23.78645
V
0,33.9674949645996
V
-1,0
BOT
0,23.7931166666667
V
0,34.3151092529297
V
-1,0
BOT
0,23.7997833333333
V
0,34.7614288330078
V
-1,0
BOT
0,23.80645
V
0,35.3212356567383
V
-1,0
BOT
0,23.8131166666667
V
0,36.0112190246582
V
-1,0
BOT
0,23.8197833333333
V
0,36.8456840515137
V
-1,0
BOT
0,23.82645
V
0,37.8384590148926
V
-1,0
BOT
0,23.8331166666667
V
0,38.9995574951172
V
-1,0
BOT
0,23.8397833333333
V
0,40.3351783752441
V
-1,0
BOT
0,23.84645
V
0,41.8462753295898
V
-1,0
BOT
0,23.8531166666667
V
0,43.5271263122559
V
-1,0
BOT
0,23.8597833333333
V
0,45.3643798828125
V
-1,0
BOT
0,23.86645
V
0,47.3370552062988
V
-1,0
BOT
0,23.8731166666667
V
0,49.4170188903809
V
-1,0
BOT
0,23.8797833333333
V
0,51.5670776367188
V
-1,0
BOT
0,23.88645
V
0,53.7433624267578
V
-1,0
BOT
0,23.8931166666667
V
0,55.8948516845703
V
-1,0
BOT
0,23.8997833333333
V
0,57.9681396484375
V
-1,0
BOT
0,23.90645
V
0,59.9055290222168
V
-1,0
BOT
0,23.9131166666667
V
0,61.6497993469238
V
-1,0
BOT
0,23.9197833333333
V
0,63.1475448608398
V
-1,0
BOT
0,23.92645
V
0,64.3506050109863
V
-1,0
BOT
0,23.9331166666667
V
0,65.2198791503906
V
-1,0
BOT
0,23.9397833333333
V
0,65.7267570495606
V
-1,0
BOT
0,23.94645
V
0,65.8555030822754
V
-1,0
BOT
0,23.9531166666667
V
0,65.6023025512695
V
-1,0
BOT
0,23.9597833333333
V
0,64.976692199707
V
-1,0
BOT
0,23.96645
V
0,63.9996528625488
V
-1,0
BOT
0,23.9731166666667
V
0,62.7036094665527
V
-1,0
BOT
0,23.9797833333333
V
0,61.1295700073242
V
-1,0
BOT
0,23.98645
V
0,59.326171875
V
-1,0
BOT
0,23.9931166666667
V
0,57.344913482666
V
-1,0
BOT
0,23.9997833333333
V
0,55.2387237548828
V
-1,0
BOT
0,24.00645
V
0,53.0600547790527
V
-1,0
BOT
0,24.0131166666667
V
0,50.8594512939453
V
-1,0
BOT
0,24.0197833333333
V
0,48.680305480957
V
-1,0
BOT
0,24.02645
V
0,46.5602874755859
V
-1,0
BOT
0,24.0331166666667
V
0,44.5308685302734
V
-1,0
BOT
0,24.0397833333333
V
0,42.6168441772461
V
-1,0
BOT
0,24.04645
V
0,40.8344268798828
V
-1,0
BOT
0,24.0531166666667
V
0,39.1941070556641
V
-1,0
BOT
0,24.0597833333333
V
0,37.6996994018555
V
-1,0
BOT
0,24.06645
V
0,36.3502502441406
V
-1,0
BOT
0,24.0731166666667
V
0,35.1405143737793
V
-1,0
BOT
0,24.0797833333333
V
0,34.062385559082
V
-1,0
BOT
0,24.08645
V
0,33.1058502197266
V
-1,0
BOT
0,24.0931166666667
V
0,32.259464263916
V
-1,0
BOT
0,24.0997833333333
V
0,31.5113067626953
V
-1,0
BOT
0,24.10645
V
0,30.8494567871094
V
-1,0
BOT
0,24.1131166666667
V
0,30.2624702453613
V
-1,0
BOT
0,24.1197833333333
V
0,29.7398567199707
V
-1,0
BOT
0,24.12645
V
0,29.271125793457
V
-1,0
BOT
0,24.1331166666667
V
0,28.8486480712891
V
-1,0
BOT
0,24.1397833333333
V
0,28.4652709960937
V
-1,0
BOT
0,24.14645
V
0,28.1152725219727
V
-1,0
BOT
0,24.1531166666667
V
0,27.7938842773437
V
-1,0
BOT
0,24.1597833333333
V
0,27.4958610534668
V
-1,0
BOT
0,24.16645
V
0,27.2178649902344
V
-1,0
BOT
0,24.1731166666667
V
0,26.9579887390137
V
-1,0
BOT
0,24.1797833333333
V
0,26.7133712768555
V
-1,0
BOT
0,24.18645
V
0,26.4840126037598
V
-1,0
BOT
0,24.1931166666667
V
0,26.268482208252
V
-1,0
BOT
0,24.1997833333333
V
0,26.0663032531738
V
-1,0
BOT
0,24.20645
V
0,25.8760452270508
V
-1,0
BOT
0,24.2131166666667
V
0,25.6977081298828
V
-1,0
BOT
0,24.2197833333333
V
0,25.5298614501953
V
-1,0
BOT
0,24.22645
V
0,25.3720283508301
V
-1,0
BOT
0,24.2331166666667
V
0,25.2232551574707
V
-1,0
BOT
0,24.2397833333333
V
0,25.0840187072754
V
-1,0
BOT
0,24.24645
V
0,24.9538421630859
V
-1,0
BOT
0,24.2531166666667
V
0,24.8312950134277
V
-1,0
BOT
0,24.2597833333333
V
0,24.7159004211426
V
-1,0
BOT
0,24.26645
V
0,24.6071815490723
V
-1,0
BOT
0,24.2731166666667
V
0,24.5041847229004
V
-1,0
BOT
0,24.2797833333333
V
0,24.4059562683105
V
-1,0
BOT
0,24.28645
V
0,24.3124961853027
V
-1,0
BOT
0,24.2931166666667
V
0,24.2242813110352
V
-1,0
BOT
0,24.2997833333333
V
0,24.1422653198242
V
-1,0
BOT
0,24.30645
V
0,24.0664482116699
V
-1,0
BOT
0,24.3131166666667
V
0,23.9968299865723
V
-1,0
BOT
0,24.3197833333333
V
0,23.9338874816895
V
-1,0
BOT
0,24.32645
V
0,23.8785743713379
V
-1,0
BOT
0,24.3331166666667
V
0,23.8313674926758
V
-1,0
BOT
0,24.3397833333333
V
0,23.7922668457031
V
-1,0
BOT
0,24.34645
V
0,23.7617492675781
V
-1,0
BOT
0,24.3531166666667
V
0,23.7398147583008
V
-1,0
BOT
0,24.3597833333333
V
0,23.7259864807129
V
-1,0
BOT
0,24.36645
V
0,23.7197875976562
V
-1,0
BOT
0,24.3731166666667
V
0,23.7202644348145
V
-1,0
BOT
0,24.3797833333333
V
0,23.7259864807129
V
-1,0
BOT
0,24.38645
V
0,23.7360000610352
V
-1,0
BOT
0,24.3931166666667
V
0,23.749828338623
V
-1,0
BOT
0,24.3997833333333
V
0,23.766040802002
V
-1,0
BOT
0,24.40645
V
0,23.7846374511719
V
-1,0
BOT
0,24.4131166666667
V
0,23.8051414489746
V
-1,0
BOT
0,24.4197833333333
V
0,23.827075958252
V
-1,0
BOT
0,24.42645
V
0,23.8509178161621
V
-1,0
BOT
0,24.4331166666667
V
0,23.8757133483887
V
-1,0
BOT
0,24.4397833333333
V
0,23.9028930664062
V
-1,0
BOT
0,24.44645
V
0,23.932933807373
V
-1,0
BOT
0,24.4531166666667
V
0,23.9672660827637
V
-1,0
BOT
0,24.4597833333333
V
0,24.0063667297363
V
-1,0
BOT
0,24.46645
V
0,24.0516662597656
V
-1,0
BOT
0,24.4731166666667
V
0,24.1036415100098
V
-1,0
BOT
0,24.4797833333333
V
0,24.1637229919434
V
-1,0
BOT
0,24.48645
V
0,24.2314338684082
V
-1,0
BOT
0,24.4931166666667
V
0,24.3062973022461
V
-1,0
BOT
0,24.4997833333333
V
0,24.3868827819824
V
-1,0
BOT
0,24.50645
V
0,24.4731903076172
V
-1,0
BOT
0,24.5131166666667
V
0,24.5623588562012
V
-1,0
BOT
0,24.5197833333333
V
0,24.6529579162598
V
-1,0
BOT
0,24.52645
V
0,24.7411727905273
V
-1,0
BOT
0,24.5331166666667
V
0,24.8250961303711
V
-1,0
BOT
0,24.5397833333333
V
0,24.9018669128418
V
-1,0
BOT
0,24.54645
V
0,24.9691009521484
V
-1,0
BOT
0,24.5531166666667
V
0,25.0229835510254
V
-1,0
BOT
0,24.5597833333333
V
0,25.062084197998
V
-1,0
BOT
0,24.56645
V
0,25.0835418701172
V
-1,0
BOT
0,24.5731166666667
V
0,25.08544921875
V
-1,0
BOT
0,24.5797833333333
V
0,25.0658988952637
V
-1,0
BOT
0,24.58645
V
0,25.0229835510254
V
-1,0
BOT
0,24.5931166666667
V
0,24.9552726745605
V
-1,0
BOT
0,24.5997833333333
V
0,24.8627662658691
V
-1,0
BOT
0,24.60645
V
0,24.744987487793
V
-1,0
BOT
0,24.6131166666667
V
0,24.6028900146484
V
-1,0
BOT
0,24.6197833333333
V
0,24.4364738464355
V
-1,0
BOT
0,24.62645
V
0,24.2471694946289
V
-1,0
BOT
0,24.6331166666667
V
0,24.0373611450195
V
-1,0
BOT
0,24.6397833333333
V
0,23.8094329833984
V
-1,0
BOT
0,24.64645
V
0,23.5648155212402
V
-1,0
BOT
0,24.6531166666667
V
0,23.3078002929687
V
-1,0
BOT
0,24.6597833333333
V
0,23.0412483215332
V
-1,0
BOT
0,24.66645
V
0,22.7689743041992
V
-1,0
BOT
0,24.6731166666667
V
0,22.4933624267578
V
-1,0
BOT
0,24.6797833333333
V
0,22.2187042236328
V
-1,0
BOT
0,24.68645
V
0,21.9478607177734
V
-1,0
BOT
0,24.6931166666667
V
0,21.6836929321289
V
-1,0
BOT
0,24.6997833333333
V
0,21.4290618896484
V
-1,0
BOT
0,24.70645
V
0,21.186351776123
V
-1,0
BOT
0,24.7131166666667
V
0,20.9560394287109
V
-1,0
BOT
0,24.7197833333333
V
0,20.7400321960449
V
-1,0
BOT
0,24.72645
V
0,20.538330078125
V
-1,0
BOT
0,24.7331166666667
V
0,20.3514099121094
V
-1,0
BOT
0,24.7397833333333
V
0,20.1797485351562
V
-1,0
BOT
0,24.74645
V
0,20.0223922729492
V
-1,0
BOT
0,24.7531166666667
V
0,19.8798179626465
V
-1,0
BOT
0,24.7597833333333
V
0,19.7510719299316
V
-1,0
BOT
0,24.76645
V
0,19.6352005004883
V
-1,0
BOT
0,24.7731166666667
V
0,19.5317268371582
V
-1,0
BOT
0,24.7797833333333
V
0,19.439697265625
V
-1,0
BOT
0,24.78645
V
0,19.3586349487305
V
-1,0
BOT
0,24.7931166666667
V
0,19.287109375
V
-1,0
BOT
0,24.7997833333333
V
0,19.2251205444336
V
-1,0
BOT
0,24.80645
V
0,19.172191619873
V
-1,0
BOT
0,24.8131166666667
V
0,19.1268920898437
V
-1,0
BOT
0,24.8197833333333
V
0,19.0896987915039
V
-1,0
BOT
0,24.82645
V
0,19.0596580505371
V
-1,0
BOT
0,24.8331166666667
V
0,19.0367698669434
V
-1,0
BOT
0,24.8397833333333
V
0,19.0200805664062
V
-1,0
BOT
0,24.84645
V
0,19.0105438232422
V
-1,0
BOT
0,24.8531166666667
V
0,19.0086364746094
V
-1,0
BOT
0,24.8597833333333
V
0,19.0134048461914
V
-1,0
BOT
0,24.86645
V
0,19.0258026123047
V
-1,0
BOT
0,24.8731166666667
V
0,19.0463066101074
V
-1,0
BOT
0,24.8797833333333
V
0,19.0749168395996
V
-1,0
BOT
0,24.88645
V
0,19.111156463623
V
-1,0
BOT
0,24.8931166666667
V
0,19.1550254821777
V
-1,0
BOT
0,24.8997833333333
V
0,19.2070007324219
V
-1,0
BOT
0,24.90645
V
0,19.2661285400391
V
-1,0
BOT
0,24.9131166666667
V
0,19.3314552307129
V
-1,0
BOT
0,24.9197833333333
V
0,19.4025039672852
V
-1,0
BOT
0,24.92645
V
0,19.4778442382812
V
-1,0
BOT
0,24.9331166666667
V
0,19.556999206543
V
-1,0
BOT
0,24.9397833333333
V
0,19.6375846862793
V
-1,0
BOT
0,24.94645
V
0,19.7176933288574
V
-1,0
BOT
0,24.9531166666667
V
0,19.7954177856445
V
-1,0
BOT
0,24.9597833333333
V
0,19.8678970336914
V
-1,0
BOT
0,24.96645
V
0,19.932746887207
V
-1,0
BOT
0,24.9731166666667
V
0,19.9880599975586
V
-1,0
BOT
0,24.9797833333333
V
0,20.0338363647461
V
-1,0
BOT
0,24.98645
V
0,20.0695991516113
V
-1,0
BOT
0,24.9931166666667
V
0,20.0943946838379
V
-1,0
BOT
0,24.9997833333333
V
0,20.111083984375
V
-1,0
BOT
0,25.00645
V
0,20.1210975646973
V
-1,0
BOT
0,25.0131166666667
V
0,20.1277732849121
V
-1,0
BOT
0,25.0197833333333
V
0,20.1363563537598
V
-1,0
BOT
0,25.02645
V
0,20.1530456542969
V
-1,0
BOT
0,25.0331166666667
V
0,20.1859474182129
V
-1,0
BOT
0,25.0397833333333
V
0,20.2450752258301
V
-1,0
BOT
0,25.04645
V
0,20.3418731689453
V
-1,0
BOT
0,25.0531166666667
V
0,20.4892158508301
V
-1,0
BOT
0,25.0597833333333
V
0,20.7014083862305
V
-1,0
BOT
0,25.06645
V
0,20.9941864013672
V
-1,0
BOT
0,25.0731166666667
V
0,21.3837623596191
V
-1,0
BOT
0,25.0797833333333
V
0,21.8853950500488
V
-1,0
BOT
0,25.08645
V
0,22.5129127502441
V
-1,0
BOT
0,25.0931166666667
V
0,23.2796669006348
V
-1,0
BOT
0,25.0997833333333
V
0,24.1937637329102
V
-1,0
BOT
0,25.10645
V
0,25.261402130127
V
-1,0
BOT
0,25.1131166666667
V
0,26.482105255127
V
-1,0
BOT
0,25.1197833333333
V
0,27.8515815734863
V
-1,0
BOT
0,25.12645
V
0,29.3583869934082
V
-1,0
BOT
0,25.1331166666667
V
0,30.9853553771973
V
-1,0
BOT
0,25.1397833333333
V
0,32.7072143554687
V
-1,0
BOT
0,25.14645
V
0,34.492015838623
V
-1,0
BOT
0,25.1531166666667
V
0,36.3016128540039
V
-1,0
BOT
0,25.1597833333333
V
0,38.0935668945312
V
-1,0
BOT
0,25.16645
V
0,39.8201942443848
V
-1,0
BOT
0,25.1731166666667
V
0,41.4328575134277
V
-1,0
BOT
0,25.1797833333333
V
0,42.8833961486816
V
-1,0
BOT
0,25.18645
V
0,44.123649597168
V
-1,0
BOT
0,25.1931166666667
V
0,45.1130867004395
V
-1,0
BOT
0,25.1997833333333
V
0,45.8149909973145
V
-1,0
BOT
0,25.20645
V
0,46.20361328125
V
-1,0
BOT
0,25.2131166666667
V
0,46.2613105773926
V
-1,0
BOT
0,25.2197833333333
V
0,45.982837677002
V
-1,0
BOT
0,25.22645
V
0,45.374870300293
V
-1,0
BOT
0,25.2331166666667
V
0,44.4545745849609
V
-1,0
BOT
0,25.2397833333333
V
0,43.2505607604981
V
-1,0
BOT
0,25.24645
V
0,41.7985916137695
V
-1,0
BOT
0,25.2531166666667
V
0,40.1430130004883
V
-1,0
BOT
0,25.2597833333333
V
0,38.3315086364746
V
-1,0
BOT
0,25.26645
V
0,36.4141464233398
V
-1,0
BOT
0,25.2731166666667
V
0,34.4409942626953
V
-1,0
BOT
0,25.2797833333333
V
0,32.4578285217285
V
-1,0
BOT
0,25.28645
V
0,30.5061340332031
V
-1,0
BOT
0,25.2931166666667
V
0,28.6221504211426
V
-1,0
BOT
0,25.2997833333333
V
0,26.8354415893555
V
-1,0
BOT
0,25.30645
V
0,25.1684188842773
V
-1,0
BOT
0,25.3131166666667
V
0,23.6372947692871
V
-1,0
BOT
0,25.3197833333333
V
0,22.2516059875488
V
-1,0
BOT
0,25.32645
V
0,21.0151672363281
V
-1,0
BOT
0,25.3331166666667
V
0,19.9260711669922
V
-1,0
BOT
0,25.3397833333333
V
0,18.979549407959
V
-1,0
BOT
0,25.34645
V
0,18.1670188903809
V
-1,0
BOT
0,25.3531166666667
V
0,17.4770355224609
V
-1,0
BOT
0,25.3597833333333
V
0,16.8981552124023
V
-1,0
BOT
0,25.36645
V
0,16.4170265197754
V
-1,0
BOT
0,25.3731166666667
V
0,16.0212516784668
V
-1,0
BOT
0,25.3797833333333
V
0,15.6965255737305
V
-1,0
BOT
0,25.38645
V
0,15.4299736022949
V
-1,0
BOT
0,25.3931166666667
V
0,15.2101516723633
V
-1,0
BOT
0,25.3997833333333
V
0,15.0256156921387
V
-1,0
BOT
0,25.40645
V
0,14.8663520812988
V
-1,0
BOT
0,25.4131166666667
V
0,14.7233009338379
V
-1,0
BOT
0,25.4197833333333
V
0,14.5893096923828
V
-1,0
BOT
0,25.42645
V
0,14.458179473877
V
-1,0
BOT
0,25.4331166666667
V
0,14.3251419067383
V
-1,0
BOT
0,25.4397833333333
V
0,14.1868591308594
V
-1,0
BOT
0,25.44645
V
0,14.040470123291
V
-1,0
BOT
0,25.4531166666667
V
0,13.885498046875
V
-1,0
BOT
0,25.4597833333333
V
0,13.7209892272949
V
-1,0
BOT
0,25.46645
V
0,13.5483741760254
V
-1,0
BOT
0,25.4731166666667
V
0,13.3686065673828
V
-1,0
BOT
0,25.4797833333333
V
0,13.1840705871582
V
-1,0
BOT
0,25.48645
V
0,12.9961967468262
V
-1,0
BOT
0,25.4931166666667
V
0,12.8073692321777
V
-1,0
BOT
0,25.4997833333333
V
0,12.6199722290039
V
-1,0
BOT
0,25.50645
V
0,12.4363899230957
V
-1,0
BOT
0,25.5131166666667
V
0,12.2599601745605
V
-1,0
BOT
0,25.5197833333333
V
0,12.092113494873
V
-1,0
BOT
0,25.52645
V
0,11.934757232666
V
-1,0
BOT
0,25.5331166666667
V
0,11.7902755737305
V
-1,0
BOT
0,25.5397833333333
V
0,11.6586685180664
V
-1,0
BOT
0,25.54645
V
0,11.540412902832
V
-1,0
BOT
0,25.5531166666667
V
0,11.4355087280273
V
-1,0
BOT
0,25.5597833333333
V
0,11.3449096679687
V
-1,0
BOT
0,25.56645
V
0,11.268138885498
V
-1,0
BOT
0,25.5731166666667
V
0,11.2051963806152
V
-1,0
BOT
0,25.5797833333333
V
0,11.1560821533203
V
-1,0
BOT
0,25.58645
V
0,11.1207962036133
V
-1,0
BOT
0,25.5931166666667
V
0,11.0983848571777
V
-1,0
BOT
0,25.5997833333333
V
0,11.0888481140137
V
-1,0
BOT
0,25.60645
V
0,11.0912322998047
V
-1,0
BOT
0,25.6131166666667
V
0,11.1050605773926
V
-1,0
BOT
0,25.6197833333333
V
0,11.1303329467773
V
-1,0
BOT
0,25.62645
V
0,11.1660957336426
V
-1,0
BOT
0,25.6331166666667
V
0,11.2118721008301
V
-1,0
BOT
0,25.6397833333333
V
0,11.2662315368652
V
-1,0
BOT
0,25.64645
V
0,11.3282203674316
V
-1,0
BOT
0,25.6531166666667
V
0,11.3964080810547
V
-1,0
BOT
0,25.6597833333333
V
0,11.4679336547852
V
-1,0
BOT
0,25.66645
V
0,11.5418434143066
V
-1,0
BOT
0,25.6731166666667
V
0,11.6157531738281
V
-1,0
BOT
0,25.6797833333333
V
0,11.6868019104004
V
-1,0
BOT
0,25.68645
V
0,11.7530822753906
V
-1,0
BOT
0,25.6931166666667
V
0,11.8122100830078
V
-1,0
BOT
0,25.6997833333333
V
0,11.8618011474609
V
-1,0
BOT
0,25.70645
V
0,11.899471282959
V
-1,0
BOT
0,25.7131166666667
V
0,11.9237899780273
V
-1,0
BOT
0,25.7197833333333
V
0,11.9333267211914
V
-1,0
BOT
0,25.72645
V
0,11.9266510009766
V
-1,0
BOT
0,25.7331166666667
V
0,11.904239654541
V
-1,0
BOT
0,25.7397833333333
V
0,11.866569519043
V
-1,0
BOT
0,25.74645
V
0,11.815071105957
V
-1,0
BOT
0,25.7531166666667
V
0,11.7506980895996
V
-1,0
BOT
0,25.7597833333333
V
0,11.6763114929199
V
-1,0
BOT
0,25.76645
V
0,11.594295501709
V
-1,0
BOT
0,25.7731166666667
V
0,11.5079879760742
V
-1,0
BOT
0,25.7797833333333
V
0,11.4202499389648
V
-1,0
BOT
0,25.78645
V
0,11.3348960876465
V
-1,0
BOT
0,25.7931166666667
V
0,11.2552642822266
V
-1,0
BOT
0,25.7997833333333
V
0,11.1861228942871
V
-1,0
BOT
0,25.80645
V
0,11.131763458252
V
-1,0
BOT
0,25.8131166666667
V
0,11.0950469970703
V
-1,0
BOT
0,25.8197833333333
V
0,11.0807418823242
V
-1,0
BOT
0,25.82645
V
0,11.0931396484375
V
-1,0
BOT
0,25.8331166666667
V
0,11.1355781555176
V
-1,0
BOT
0,25.8397833333333
V
0,11.2123489379883
V
-1,0
BOT
0,25.84645
V
0,11.3272666931152
V
-1,0
BOT
0,25.8531166666667
V
0,11.4850997924805
V
-1,0
BOT
0,25.8597833333333
V
0,11.6896629333496
V
-1,0
BOT
0,25.86645
V
0,11.9438171386719
V
-1,0
BOT
0,25.8731166666667
V
0,12.2504234313965
V
-1,0
BOT
0,25.8797833333333
V
0,12.6104354858398
V
-1,0
BOT
0,25.88645
V
0,13.0248069763184
V
-1,0
BOT
0,25.8931166666667
V
0,13.4916305541992
V
-1,0
BOT
0,25.8997833333333
V
0,14.0061378479004
V
-1,0
BOT
0,25.90645
V
0,14.5635604858398
V
-1,0
BOT
0,25.9131166666667
V
0,15.1538848876953
V
-1,0
BOT
0,25.9197833333333
V
0,15.7661437988281
V
-1,0
BOT
0,25.92645
V
0,16.3865089416504
V
-1,0
BOT
0,25.9331166666667
V
0,16.9997215270996
V
-1,0
BOT
0,25.9397833333333
V
0,17.5890922546387
V
-1,0
BOT
0,25.94645
V
0,18.1365013122559
V
-1,0
BOT
0,25.9531166666667
V
0,18.6238288879395
V
-1,0
BOT
0,25.9597833333333
V
0,19.0348625183105
V
-1,0
BOT
0,25.96645
V
0,19.3548202514648
V
-1,0
BOT
0,25.9731166666667
V
0,19.5698738098145
V
-1,0
BOT
0,25.9797833333333
V
0,19.6714401245117
V
-1,0
BOT
0,25.98645
V
0,19.6537971496582
V
-1,0
BOT
0,25.9931166666667
V
0,19.5169448852539
V
-1,0
BOT
0,25.9997833333333
V
0,19.263744354248
V
-1,0
BOT
0,26.00645
V
0,18.9018249511719
V
-1,0
BOT
0,26.0131166666667
V
0,18.4431076049805
V
-1,0
BOT
0,26.0197833333333
V
0,17.9018974304199
V
-1,0
BOT
0,26.02645
V
0,17.2953605651855
V
-1,0
BOT
0,26.0331166666667
V
0,16.6406631469727
V
-1,0
BOT
0,26.0397833333333
V
0,15.9568786621094
V
-1,0
BOT
0,26.04645
V
0,15.2616500854492
V
-1,0
BOT
0,26.0531166666667
V
0,14.5716667175293
V
-1,0
BOT
0,26.0597833333333
V
0,13.9002799987793
V
-1,0
BOT
0,26.06645
V
0,13.2594108581543
V
-1,0
BOT
0,26.0731166666667
V
0,12.6581192016602
V
-1,0
BOT
0,26.0797833333333
V
0,12.1030807495117
V
-1,0
BOT
0,26.08645
V
0,11.5985870361328
V
-1,0
BOT
0,26.0931166666667
V
0,11.146068572998
V
-1,0
BOT
0,26.0997833333333
V
0,10.744571685791
V
-1,0
BOT
0,26.10645
V
0,10.3926658630371
V
-1,0
BOT
0,26.1131166666667
V
0,10.0874900817871
V
-1,0
BOT
0,26.1197833333333
V
0,9.82379913330078
V
-1,0
BOT
0,26.12645
V
0,9.59682464599609
V
-1,0
BOT
0,26.1331166666667
V
0,9.40275192260742
V
-1,0
BOT
0,26.1397833333333
V
0,9.23681259155273
V
-1,0
BOT
0,26.14645
V
0,9.09519195556641
V
-1,0
BOT
0,26.1531166666667
V
0,8.97455215454102
V
-1,0
BOT
0,26.1597833333333
V
0,8.87155532836914
V
-1,0
BOT
0,26.16645
V
0,8.78334045410156
V
-1,0
BOT
0,26.1731166666667
V
0,8.70752334594727
V
-1,0
BOT
0,26.1797833333333
V
0,8.64219665527344
V
-1,0
BOT
0,26.18645
V
0,8.58640670776367
V
-1,0
BOT
0,26.1931166666667
V
0,8.53872299194336
V
-1,0
BOT
0,26.1997833333333
V
0,8.4986686706543
V
-1,0
BOT
0,26.20645
V
0,8.46529006958008
V
-1,0
BOT
0,26.2131166666667
V
0,8.4385871887207
V
-1,0
BOT
0,26.2197833333333
V
0,8.41808319091797
V
-1,0
BOT
0,26.22645
V
0,8.40330123901367
V
-1,0
BOT
0,26.2331166666667
V
0,8.39376449584961
V
-1,0
BOT
0,26.2397833333333
V
0,8.38804244995117
V
-1,0
BOT
0,26.24645
V
0,8.38518142700195
V
-1,0
BOT
0,26.2531166666667
V
0,8.38470458984375
V
-1,0
BOT
0,26.2597833333333
V
0,8.38565826416016
V
-1,0
BOT
0,26.26645
V
0,8.38613510131836
V
-1,0
BOT
0,26.2731166666667
V
0,8.38613510131836
V
-1,0
BOT
0,26.2797833333333
V
0,8.38375091552734
V
-1,0
BOT
0,26.28645
V
0,8.37898254394531
V
-1,0
BOT
0,26.2931166666667
V
0,8.37087631225586
V
-1,0
BOT
0,26.2997833333333
V
0,8.35943222045898
V
-1,0
BOT
0,26.30645
V
0,8.34512710571289
V
-1,0
BOT
0,26.3131166666667
V
0,8.32700729370117
V
-1,0
BOT
0,26.3197833333333
V
0,8.30602645874023
V
-1,0
BOT
0,26.32645
V
0,8.28170776367188
V
-1,0
BOT
0,26.3331166666667
V
0,8.25405120849609
V
-1,0
BOT
0,26.3397833333333
V
0,8.2244873046875
V
-1,0
BOT
0,26.34645
V
0,8.19206237792969
V
-1,0
BOT
0,26.3531166666667
V
0,8.15868377685547
V
-1,0
BOT
0,26.3597833333333
V
0,8.12387466430664
V
-1,0
BOT
0,26.36645
V
0,8.08858871459961
V
-1,0
BOT
0,26.3731166666667
V
0,8.05282592773438
V
-1,0
BOT
0,26.3797833333333
V
0,8.01658630371094
V
-1,0
BOT
0,26.38645
V
0,7.97939300537109
V
-1,0
BOT
0,26.3931166666667
V
0,7.94124603271484
V
-1,0
BOT
0,26.3997833333333
V
0,7.90262222290039
V
-1,0
BOT
0,26.40645
V
0,7.86304473876953
V
-1,0
BOT
0,26.4131166666667
V
0,7.82251358032227
V
-1,0
BOT
0,26.4197833333333
V
0,7.78102874755859
V
-1,0
BOT
0,26.42645
V
0,7.73763656616211
V
-1,0
BOT
0,26.4331166666667
V
0,7.69329071044922
V
-1,0
BOT
0,26.4397833333333
V
0,7.64656066894531
V
-1,0
BOT
0,26.44645
V
0,7.5984001159668
V
-1,0
BOT
0,26.4531166666667
V
0,7.54880905151367
V
-1,0
BOT
0,26.4597833333333
V
0,7.49969482421875
V
-1,0
BOT
0,26.46645
V
0,7.45058059692383
V
-1,0
BOT
0,26.4731166666667
V
0,7.40242004394531
V
-1,0
BOT
0,26.4797833333333
V
0,7.35664367675781
V
-1,0
BOT
0,26.48645
V
0,7.31372833251953
V
-1,0
BOT
0,26.4931166666667
V
0,7.27558135986328
V
-1,0
BOT
0,26.4997833333333
V
0,7.24315643310547
V
-1,0
BOT
0,26.50645
V
0,7.21836090087891
V
-1,0
BOT
0,26.5131166666667
V
0,7.20310211181641
V
-1,0
BOT
0,26.5197833333333
V
0,7.19881057739258
V
-1,0
BOT
0,26.52645
V
0,7.20643997192383
V
-1,0
BOT
0,26.5331166666667
V
0,7.22551345825195
V
-1,0
BOT
0,26.5397833333333
V
0,7.25746154785156
V
-1,0
BOT
0,26.54645
V
0,7.30228424072266
V
-1,0
BOT
0,26.5531166666667
V
0,7.35950469970703
V
-1,0
BOT
0,26.5597833333333
V
0,7.42864608764648
V
-1,0
BOT
0,26.56645
V
0,7.50875473022461
V
-1,0
BOT
0,26.5731166666667
V
0,7.59744644165039
V
-1,0
BOT
0,26.5797833333333
V
0,7.69329071044922
V
-1,0
BOT
0,26.58645
V
0,7.79342651367188
V
-1,0
BOT
0,26.5931166666667
V
0,7.89451599121094
V
-1,0
BOT
0,26.5997833333333
V
0,7.99322128295898
V
-1,0
BOT
0,26.60645
V
0,8.08620452880859
V
-1,0
BOT
0,26.6131166666667
V
0,8.17012786865234
V
-1,0
BOT
0,26.6197833333333
V
0,8.24213027954102
V
-1,0
BOT
0,26.62645
V
0,8.29935073852539
V
-1,0
BOT
0,26.6331166666667
V
0,8.33940505981445
V
-1,0
BOT
0,26.6397833333333
V
0,8.36086273193359
V
-1,0
BOT
0,26.64645
V
0,8.3622932434082
V
-1,0
BOT
0,26.6531166666667
V
0,8.34274291992188
V
-1,0
BOT
0,26.6597833333333
V
0,8.30268859863281
V
-1,0
BOT
0,26.66645
V
0,8.24260711669922
V
-1,0
BOT
0,26.6731166666667
V
0,8.1639289855957
V
-1,0
BOT
0,26.6797833333333
V
0,8.06951522827148
V
-1,0
BOT
0,26.68645
V
0,7.96127319335938
V
-1,0
BOT
0,26.6931166666667
V
0,7.84206390380859
V
-1,0
BOT
0,26.6997833333333
V
0,7.71570205688477
V
-1,0
BOT
0,26.70645
V
0,7.58457183837891
V
-1,0
BOT
0,26.7131166666667
V
0,7.45105743408203
V
-1,0
BOT
0,26.7197833333333
V
0,7.31754302978516
V
-1,0
BOT
0,26.72645
V
0,7.1864128112793
V
-1,0
BOT
0,26.7331166666667
V
0,7.05957412719727
V
-1,0
BOT
0,26.7397833333333
V
0,6.93941116333008
V
-1,0
BOT
0,26.74645
V
0,6.82640075683594
V
-1,0
BOT
0,26.7531166666667
V
0,6.72245025634766
V
-1,0
BOT
0,26.7597833333333
V
0,6.62755966186523
V
-1,0
BOT
0,26.76645
V
0,6.54172897338867
V
-1,0
BOT
0,26.7731166666667
V
0,6.46591186523438
V
-1,0
BOT
0,26.7797833333333
V
0,6.39867782592773
V
-1,0
BOT
0,26.78645
V
0,6.33955001831055
V
-1,0
BOT
0,26.7931166666667
V
0,6.2870979309082
V
-1,0
BOT
0,26.7997833333333
V
0,6.2408447265625
V
-1,0
BOT
0,26.80645
V
0,6.19888305664063
V
-1,0
BOT
0,26.8131166666667
V
0,6.16121292114258
V
-1,0
BOT
0,26.8197833333333
V
0,6.12592697143555
V
-1,0
BOT
0,26.82645
V
0,6.09350204467773
V
-1,0
BOT
0,26.8331166666667
V
0,6.06250762939453
V
-1,0
BOT
0,26.8397833333333
V
0,6.03342056274414
V
-1,0
BOT
0,26.84645
V
0,6.00528717041016
V
-1,0
BOT
0,26.8531166666667
V
0,5.97763061523438
V
-1,0
BOT
0,26.8597833333333
V
0,5.950927734375
V
-1,0
BOT
0,26.86645
V
0,5.92422485351563
V
-1,0
BOT
0,26.8731166666667
V
0,5.89752197265625
V
-1,0
BOT
0,26.8797833333333
V
0,5.87081909179688
V
-1,0
BOT
0,26.88645
V
0,5.8436393737793
V
-1,0
BOT
0,26.8931166666667
V
0,5.81645965576172
V
-1,0
BOT
0,26.8997833333333
V
0,5.78927993774414
V
-1,0
BOT
0,26.90645
V
0,5.76210021972656
V
-1,0
BOT
0,26.9131166666667
V
0,5.73587417602539
V
-1,0
BOT
0,26.9197833333333
V
0,5.71012496948242
V
-1,0
BOT
0,26.92645
V
0,5.68437576293945
V
-1,0
BOT
0,26.9331166666667
V
0,5.65862655639648
V
-1,0
BOT
0,26.9397833333333
V
0,5.63287734985352
V
-1,0
BOT
0,26.94645
V
0,5.60712814331055
V
-1,0
BOT
0,26.9531166666667
V
0,5.58090209960938
V
-1,0
BOT
0,26.9597833333333
V
0,5.55419921875
V
-1,0
BOT
0,26.96645
V
0,5.52749633789063
V
-1,0
BOT
0,26.9731166666667
V
0,5.50031661987305
V
-1,0
BOT
0,26.9797833333333
V
0,5.47266006469727
V
-1,0
BOT
0,26.98645
V
0,5.44404983520508
V
-1,0
BOT
0,26.9931166666667
V
0,5.41448593139648
V
-1,0
BOT
0,26.9997833333333
V
0,5.38396835327148
V
-1,0
BOT
0,27.00645
V
0,5.35297393798828
V
-1,0
BOT
0,27.0131166666667
V
0,5.32102584838867
V
-1,0
BOT
0,27.0197833333333
V
0,5.28764724731445
V
-1,0
BOT
0,27.02645
V
0,5.25379180908203
V
-1,0
BOT
0,27.0331166666667
V
0,5.21993637084961
V
-1,0
BOT
0,27.0397833333333
V
0,5.18608093261719
V
-1,0
BOT
0,27.04645
V
0,5.15127182006836
V
-1,0
BOT
0,27.0531166666667
V
0,5.11646270751953
V
-1,0
BOT
0,27.0597833333333
V
0,5.0816535949707
V
-1,0
BOT
0,27.06645
V
0,5.04684448242188
V
-1,0
BOT
0,27.0731166666667
V
0,5.01203536987305
V
-1,0
BOT
0,27.0797833333333
V
0,4.97627258300781
V
-1,0
BOT
0,27.08645
V
0,4.94003295898438
V
-1,0
BOT
0,27.0931166666667
V
0,4.90331649780273
V
-1,0
BOT
0,27.0997833333333
V
0,4.86660003662109
V
-1,0
BOT
0,27.10645
V
0,4.82988357543945
V
-1,0
BOT
0,27.1131166666667
V
0,4.79316711425781
V
-1,0
BOT
0,27.1197833333333
V
0,4.75740432739258
V
-1,0
BOT
0,27.12645
V
0,4.72259521484375
V
-1,0
BOT
0,27.1331166666667
V
0,4.68873977661133
V
-1,0
BOT
0,27.1397833333333
V
0,4.65679168701172
V
-1,0
BOT
0,27.14645
V
0,4.62627410888672
V
-1,0
BOT
0,27.1531166666667
V
0,4.59766387939453
V
-1,0
BOT
0,27.1597833333333
V
0,4.57143783569336
V
-1,0
BOT
0,27.16645
V
0,4.5475959777832
V
-1,0
BOT
0,27.1731166666667
V
0,4.52613830566406
V
-1,0
BOT
0,27.1797833333333
V
0,4.50611114501953
V
-1,0
BOT
0,27.18645
V
0,4.48751449584961
V
-1,0
BOT
0,27.1931166666667
V
0,4.4703483581543
V
-1,0
BOT
0,27.1997833333333
V
0,4.45413589477539
V
-1,0
BOT
0,27.20645
V
0,4.43840026855469
V
-1,0
BOT
0,27.2131166666667
V
0,4.42266464233398
V
-1,0
BOT
0,27.2197833333333
V
0,4.40692901611328
V
-1,0
BOT
0,27.22645
V
0,4.39023971557617
V
-1,0
BOT
0,27.2331166666667
V
0,4.37164306640625
V
-1,0
BOT
0,27.2397833333333
V
0,4.35066223144531
V
-1,0
BOT
0,27.24645
V
0,4.32729721069336
V
-1,0
BOT
0,27.2531166666667
V
0,4.30154800415039
V
-1,0
BOT
0,27.2597833333333
V
0,4.27341461181641
V
-1,0
BOT
0,27.26645
V
0,4.24337387084961
V
-1,0
BOT
0,27.2731166666667
V
0,4.2119026184082
V
-1,0
BOT
0,27.2797833333333
V
0,4.17900085449219
V
-1,0
BOT
0,27.28645
V
0,4.14514541625977
V
-1,0
BOT
0,27.2931166666667
V
0,4.11033630371094
V
-1,0
BOT
0,27.2997833333333
V
0,4.07552719116211
V
-1,0
BOT
0,27.30645
V
0,4.04024124145508
V
-1,0
BOT
0,27.3131166666667
V
0,4.00590896606445
V
-1,0
BOT
0,27.3197833333333
V
0,3.97300720214844
V
-1,0
BOT
0,27.32645
V
0,3.94201278686523
V
-1,0
BOT
0,27.3331166666667
V
0,3.91340255737305
V
-1,0
BOT
0,27.3397833333333
V
0,3.88765335083008
V
-1,0
BOT
0,27.34645
V
0,3.86381149291992
V
-1,0
BOT
0,27.3531166666667
V
0,3.84283065795898
V
-1,0
BOT
0,27.3597833333333
V
0,3.82423400878906
V
-1,0
BOT
0,27.36645
V
0,3.80754470825195
V
-1,0
BOT
0,27.3731166666667
V
0,3.79323959350586
V
-1,0
BOT
0,27.3797833333333
V
0,3.78179550170898
V
-1,0
BOT
0,27.38645
V
0,3.77273559570312
V
-1,0
BOT
0,27.3931166666667
V
0,3.76558303833008
V
-1,0
BOT
0,27.3997833333333
V
0,3.76081466674805
V
-1,0
BOT
0,27.40645
V
0,3.75747680664062
V
-1,0
BOT
0,27.4131166666667
V
0,3.75604629516602
V
-1,0
BOT
0,27.4197833333333
V
0,3.75699996948242
V
-1,0
BOT
0,27.42645
V
0,3.75986099243164
V
-1,0
BOT
0,27.4331166666667
V
0,3.76415252685547
V
-1,0
BOT
0,27.4397833333333
V
0,3.77130508422852
V
-1,0
BOT
0,27.44645
V
0,3.78036499023437
V
-1,0
BOT
0,27.4531166666667
V
0,3.79180908203125
V
-1,0
BOT
0,27.4597833333333
V
0,3.80516052246094
V
-1,0
BOT
0,27.46645
V
0,3.81994247436523
V
-1,0
BOT
0,27.4731166666667
V
0,3.83663177490234
V
-1,0
BOT
0,27.4797833333333
V
0,3.85475158691406
V
-1,0
BOT
0,27.48645
V
0,3.87382507324219
V
-1,0
BOT
0,27.4931166666667
V
0,3.89337539672852
V
-1,0
BOT
0,27.4997833333333
V
0,3.91340255737305
V
-1,0
BOT
0,27.50645
V
0,3.93390655517578
V
-1,0
BOT
0,27.5131166666667
V
0,3.95441055297852
V
-1,0
BOT
0,27.5197833333333
V
0,3.97443771362305
V
-1,0
BOT
0,27.52645
V
0,3.99351119995117
V
-1,0
BOT
0,27.5331166666667
V
0,4.01163101196289
V
-1,0
BOT
0,27.5397833333333
V
0,4.0283203125
V
-1,0
BOT
0,27.54645
V
0,4.04262542724609
V
-1,0
BOT
0,27.5531166666667
V
0,4.05550003051758
V
-1,0
BOT
0,27.5597833333333
V
0,4.06694412231445
V
-1,0
BOT
0,27.56645
V
0,4.07648086547852
V
-1,0
BOT
0,27.5731166666667
V
0,4.08411026000977
V
-1,0
BOT
0,27.5797833333333
V
0,4.0898323059082
V
-1,0
BOT
0,27.58645
V
0,4.09460067749023
V
-1,0
BOT
0,27.5931166666667
V
0,4.09698486328125
V
-1,0
BOT
0,27.5997833333333
V
0,4.09841537475586
V
-1,0
BOT
0,27.60645
V
0,4.09841537475586
V
-1,0
BOT
0,27.6131166666667
V
0,4.09746170043945
V
-1,0
BOT
0,27.6197833333333
V
0,4.09507751464844
V
-1,0
BOT
0,27.62645
V
0,4.09173965454102
V
-1,0
BOT
0,27.6331166666667
V
0,4.08697128295898
V
-1,0
BOT
0,27.6397833333333
V
0,4.08077239990234
V
-1,0
BOT
0,27.64645
V
0,4.07314300537109
V
-1,0
BOT
0,27.6531166666667
V
0,4.06408309936523
V
-1,0
BOT
0,27.6597833333333
V
0,4.05359268188477
V
-1,0
BOT
0,27.66645
V
0,4.04119491577148
V
-1,0
BOT
0,27.6731166666667
V
0,4.02736663818359
V
-1,0
BOT
0,27.6797833333333
V
0,4.0125846862793
V
-1,0
BOT
0,27.68645
V
0,3.9973258972168
V
-1,0
BOT
0,27.6931166666667
V
0,3.9820671081543
V
-1,0
BOT
0,27.6997833333333
V
0,3.96728515625
V
-1,0
BOT
0,27.70645
V
0,3.95345687866211
V
-1,0
BOT
0,27.7131166666667
V
0,3.94153594970703
V
-1,0
BOT
0,27.7197833333333
V
0,3.93199920654297
V
-1,0
BOT
0,27.72645
V
0,3.92484664916992
V
-1,0
BOT
0,27.7331166666667
V
0,3.92055511474609
V
-1,0
BOT
0,27.7397833333333
V
0,3.92055511474609
V
-1,0
BOT
0,27.74645
V
0,3.92532348632812
V
-1,0
BOT
0,27.7531166666667
V
0,3.936767578125
V
-1,0
BOT
0,27.7597833333333
V
0,3.95393371582031
V
-1,0
BOT
0,27.76645
V
0,3.97729873657227
V
-1,0
BOT
0,27.7731166666667
V
0,4.00590896606445
V
-1,0
BOT
0,27.7797833333333
V
0,4.03976440429688
V
-1,0
BOT
0,27.78645
V
0,4.07743453979492
V
-1,0
BOT
0,27.7931166666667
V
0,4.11701202392578
V
-1,0
BOT
0,27.7997833333333
V
0,4.15754318237305
V
-1,0
BOT
0,27.80645
V
0,4.19759750366211
V
-1,0
BOT
0,27.8131166666667
V
0,4.23574447631836
V
-1,0
BOT
0,27.8197833333333
V
0,4.27007675170898
V
-1,0
BOT
0,27.82645
V
0,4.29916381835938
V
-1,0
BOT
0,27.8331166666667
V
0,4.32157516479492
V
-1,0
BOT
0,27.8397833333333
V
0,4.33635711669922
V
-1,0
BOT
0,27.84645
V
0,4.34207916259766
V
-1,0
BOT
0,27.8531166666667
V
0,4.33874130249023
V
-1,0
BOT
0,27.8597833333333
V
0,4.32586669921875
V
-1,0
BOT
0,27.86645
V
0,4.30393218994141
V
-1,0
BOT
0,27.8731166666667
V
0,4.27389144897461
V
-1,0
BOT
0,27.8797833333333
V
0,4.23622131347656
V
-1,0
BOT
0,27.88645
V
0,4.19187545776367
V
-1,0
BOT
0,27.8931166666667
V
0,4.14228439331055
V
-1,0
BOT
0,27.8997833333333
V
0,4.08935546875
V
-1,0
BOT
0,27.90645
V
0,4.03451919555664
V
-1,0
BOT
0,27.9131166666667
V
0,3.97872924804687
V
-1,0
BOT
0,27.9197833333333
V
0,3.92293930053711
V
-1,0
BOT
0,27.92645
V
0,3.86953353881836
V
-1,0
BOT
0,27.9331166666667
V
0,3.81851196289062
V
-1,0
BOT
0,27.9397833333333
V
0,3.77130508422852
V
-1,0
BOT
0,27.94645
V
0,3.72934341430664
V
-1,0
BOT
0,27.9531166666667
V
0,3.6921501159668
V
-1,0
BOT
0,27.9597833333333
V
0,3.66020202636719
V
-1,0
BOT
0,27.96645
V
0,3.63302230834961
V
-1,0
BOT
0,27.9731166666667
V
0,3.61013412475586
V
-1,0
BOT
0,27.9797833333333
V
0,3.59153747558594
V
-1,0
BOT
0,27.98645
V
0,3.57532501220703
V
-1,0
BOT
0,27.9931166666667
V
0,3.56101989746094
V
-1,0
BOT
0,27.9997833333333
V
0,3.54862213134766
V
-1,0
BOT
0,28.00645
V
0,3.53717803955078
V
-1,0
BOT
0,28.0131166666667
V
0,3.5252571105957
V
-1,0
BOT
0,28.0197833333333
V
0,3.51190567016602
V
-1,0
BOT
0,28.02645
V
0,3.49664688110352
V
-1,0
BOT
0,28.0331166666667
V
0,3.47900390625
V
-1,0
BOT
0,28.0397833333333
V
0,3.45754623413086
V
-1,0
BOT
0,28.04645
V
0,3.4332275390625
V
-1,0
BOT
0,28.0531166666667
V
0,3.40557098388672
V
-1,0
BOT
0,28.0597833333333
V
0,3.37553024291992
V
-1,0
BOT
0,28.06645
V
0,3.34262847900391
V
-1,0
BOT
0,28.0731166666667
V
0,3.30781936645508
V
-1,0
BOT
0,28.0797833333333
V
0,3.27157974243164
V
-1,0
BOT
0,28.08645
V
0,3.2353401184082
V
-1,0
BOT
0,28.0931166666667
V
0,3.19957733154297
V
-1,0
BOT
0,28.0997833333333
V
0,3.16476821899414
V
-1,0
BOT
0,28.10645
V
0,3.13186645507812
V
-1,0
BOT
0,28.1131166666667
V
0,3.10277938842773
V
-1,0
BOT
0,28.1197833333333
V
0,3.07703018188477
V
-1,0
BOT
0,28.12645
V
0,3.05604934692383
V
-1,0
BOT
0,28.1331166666667
V
0,3.04031372070312
V
-1,0
BOT
0,28.1397833333333
V
0,3.02982330322266
V
-1,0
BOT
0,28.14645
V
0,3.02505493164062
V
-1,0
BOT
0,28.1531166666667
V
0,3.02600860595703
V
-1,0
BOT
0,28.1597833333333
V
0,3.03220748901367
V
-1,0
BOT
0,28.16645
V
0,3.04365158081055
V
-1,0
BOT
0,28.1731166666667
V
0,3.05843353271484
V
-1,0
BOT
0,28.1797833333333
V
0,3.07655334472656
V
-1,0
BOT
0,28.18645
V
0,3.09658050537109
V
-1,0
BOT
0,28.1931166666667
V
0,3.11756134033203
V
-1,0
BOT
0,28.1997833333333
V
0,3.13949584960937
V
-1,0
BOT
0,28.20645
V
0,3.16047668457031
V
-1,0
BOT
0,28.2131166666667
V
0,3.18002700805664
V
-1,0
BOT
0,28.2197833333333
V
0,3.19766998291016
V
-1,0
BOT
0,28.22645
V
0,3.21245193481445
V
-1,0
BOT
0,28.2331166666667
V
0,3.22532653808594
V
-1,0
BOT
0,28.2397833333333
V
0,3.23486328125
V
-1,0
BOT
0,28.24645
V
0,3.24249267578125
V
-1,0
BOT
0,28.2531166666667
V
0,3.24773788452148
V
-1,0
BOT
0,28.2597833333333
V
0,3.25202941894531
V
-1,0
BOT
0,28.26645
V
0,3.25632095336914
V
-1,0
BOT
0,28.2731166666667
V
0,3.26061248779297
V
-1,0
BOT
0,28.2797833333333
V
0,3.26633453369141
V
-1,0
BOT
0,28.28645
V
0,3.27444076538086
V
-1,0
BOT
0,28.2931166666667
V
0,3.28540802001953
V
-1,0
BOT
0,28.2997833333333
V
0,3.30018997192383
V
-1,0
BOT
0,28.30645
V
0,3.31830978393555
V
-1,0
BOT
0,28.3131166666667
V
0,3.3411979675293
V
-1,0
BOT
0,28.3197833333333
V
0,3.36933135986328
V
-1,0
BOT
0,28.32645
V
0,3.40366363525391
V
-1,0
BOT
0,28.3331166666667
V
0,3.44371795654297
V
-1,0
BOT
0,28.3397833333333
V
0,3.48949432373047
V
-1,0
BOT
0,28.34645
V
0,3.5405158996582
V
-1,0
BOT
0,28.3531166666667
V
0,3.59535217285156
V
-1,0
BOT
0,28.3597833333333
V
0,3.65352630615234
V
-1,0
BOT
0,28.36645
V
0,3.71265411376953
V
-1,0
BOT
0,28.3731166666667
V
0,3.77178192138672
V
-1,0
BOT
0,28.3797833333333
V
0,3.8294792175293
V
-1,0
BOT
0,28.38645
V
0,3.88336181640625
V
-1,0
BOT
0,28.3931166666667
V
0,3.93199920654297
V
-1,0
BOT
0,28.3997833333333
V
0,3.97348403930664
V
-1,0
BOT
0,28.40645
V
0,4.00638580322266
V
-1,0
BOT
0,28.4131166666667
V
0,4.03070449829102
V
-1,0
BOT
0,28.4197833333333
V
0,4.04453277587891
V
-1,0
BOT
0,28.42645
V
0,4.04834747314453
V
-1,0
BOT
0,28.4331166666667
V
0,4.04167175292969
V
-1,0
BOT
0,28.4397833333333
V
0,4.02641296386719
V
-1,0
BOT
0,28.44645
V
0,4.00257110595703
V
-1,0
BOT
0,28.4531166666667
V
0,3.97253036499023
V
-1,0
BOT
0,28.4597833333333
V
0,3.93772125244141
V
-1,0
BOT
0,28.46645
V
0,3.90005111694336
V
-1,0
BOT
0,28.4731166666667
V
0,3.86285781860352
V
-1,0
BOT
0,28.4797833333333
V
0,3.82709503173828
V
-1,0
BOT
0,28.48645
V
0,3.79610061645508
V
-1,0
BOT
0,28.4931166666667
V
0,3.77130508422852
V
-1,0
BOT
0,28.4997833333333
V
0,3.75604629516602
V
-1,0
BOT
0,28.50645
V
0,3.75223159790039
V
-1,0
BOT
0,28.5131166666667
V
0,3.76224517822266
V
-1,0
BOT
0,28.5197833333333
V
0,3.78894805908203
V
-1,0
BOT
0,28.52645
V
0,3.83472442626953
V
-1,0
BOT
0,28.5331166666667
V
0,3.90148162841797
V
-1,0
BOT
0,28.5397833333333
V
0,3.99208068847656
V
-1,0
BOT
0,28.54645
V
0,4.10795211791992
V
-1,0
BOT
0,28.5531166666667
V
0,4.25100326538086
V
-1,0
BOT
0,28.5597833333333
V
0,4.42409515380859
V
-1,0
BOT
0,28.56645
V
0,4.62865829467773
V
-1,0
BOT
0,28.5731166666667
V
0,4.86564636230469
V
-1,0
BOT
0,28.5797833333333
V
0,5.13696670532227
V
-1,0
BOT
0,28.58645
V
0,5.44261932373047
V
-1,0
BOT
0,28.5931166666667
V
0,5.78165054321289
V
-1,0
BOT
0,28.5997833333333
V
0,6.15215301513672
V
-1,0
BOT
0,28.60645
V
0,6.55174255371094
V
-1,0
BOT
0,28.6131166666667
V
0,6.97708129882813
V
-1,0
BOT
0,28.6197833333333
V
0,7.42340087890625
V
-1,0
BOT
0,28.62645
V
0,7.88354873657227
V
-1,0
BOT
0,28.6331166666667
V
0,8.35132598876953
V
-1,0
BOT
0,28.6397833333333
V
0,8.81814956665039
V
-1,0
BOT
0,28.64645
V
0,9.27543640136719
V
-1,0
BOT
0,28.6531166666667
V
0,9.71269607543945
V
-1,0
BOT
0,28.6597833333333
V
0,10.1213455200195
V
-1,0
BOT
0,28.66645
V
0,10.4904174804687
V
-1,0
BOT
0,28.6731166666667
V
0,10.8113288879395
V
-1,0
BOT
0,28.6797833333333
V
0,11.075496673584
V
-1,0
BOT
0,28.68645
V
0,11.2743377685547
V
-1,0
BOT
0,28.6931166666667
V
0,11.4035606384277
V
-1,0
BOT
0,28.6997833333333
V
0,11.4583969116211
V
-1,0
BOT
0,28.70645
V
0,11.4378929138184
V
-1,0
BOT
0,28.7131166666667
V
0,11.3420486450195
V
-1,0
BOT
0,28.7197833333333
V
0,11.174201965332
V
-1,0
BOT
0,28.72645
V
0,10.9376907348633
V
-1,0
BOT
0,28.7331166666667
V
0,10.6391906738281
V
-1,0
BOT
0,28.7397833333333
V
0,10.2863311767578
V
-1,0
BOT
0,28.74645
V
0,9.88674163818359
V
-1,0
BOT
0,28.7531166666667
V
0,9.45043563842773
V
-1,0
BOT
0,28.7597833333333
V
0,8.9869499206543
V
-1,0
BOT
0,28.76645
V
0,8.50629806518555
V
-1,0
BOT
0,28.7731166666667
V
0,8.01753997802734
V
-1,0
BOT
0,28.7797833333333
V
0,7.52878189086914
V
-1,0
BOT
0,28.78645
V
0,7.04860687255859
V
-1,0
BOT
0,28.7931166666667
V
0,6.58226013183594
V
-1,0
BOT
0,28.7997833333333
V
0,6.13641738891602
V
-1,0
BOT
0,28.80645
V
0,5.71489334106445
V
-1,0
BOT
0,28.8131166666667
V
0,5.32150268554688
V
-1,0
BOT
0,28.8197833333333
V
0,4.95815277099609
V
-1,0
BOT
0,28.82645
V
0,4.62484359741211
V
-1,0
BOT
0,28.8331166666667
V
0,4.32157516479492
V
-1,0
BOT
0,28.8397833333333
V
0,4.04739379882813
V
-1,0
BOT
0,28.84645
V
0,3.80182266235352
V
-1,0
BOT
0,28.8531166666667
V
0,3.58247756958008
V
-1,0
BOT
0,28.8597833333333
V
0,3.3869743347168
V
-1,0
BOT
0,28.86645
V
0,3.21388244628906
V
-1,0
BOT
0,28.8731166666667
V
0,3.06081771850586
V
-1,0
BOT
0,28.8797833333333
V
0,2.92587280273437
V
-1,0
BOT
0,28.88645
V
0,2.80666351318359
V
-1,0
BOT
0,28.8931166666667
V
0,2.7008056640625
V
-1,0
BOT
0,28.8997833333333
V
0,2.60639190673828
V
-1,0
BOT
0,28.90645
V
0,2.52151489257812
V
-1,0
BOT
0,28.9131166666667
V
0,2.44474411010742
V
-1,0
BOT
0,28.9197833333333
V
0,2.37417221069336
V
-1,0
BOT
0,28.92645
V
0,2.30932235717773
V
-1,0
BOT
0,28.9331166666667
V
0,2.24924087524414
V
-1,0
BOT
0,28.9397833333333
V
0,2.19392776489258
V
-1,0
BOT
0,28.94645
V
0,2.14242935180664
V
-1,0
BOT
0,28.9531166666667
V
0,2.09474563598633
V
-1,0
BOT
0,28.9597833333333
V
0,2.05039978027344
V
-1,0
BOT
0,28.96645
V
0,2.00843811035156
V
-1,0
BOT
0,28.9731166666667
V
0,1.96933746337891
V
-1,0
BOT
0,28.9797833333333
V
0,1.93357467651367
V
-1,0
BOT
0,28.98645
V
0,1.90114974975586
V
-1,0
BOT
0,28.9931166666667
V
0,1.87206268310547
V
-1,0
BOT
0,28.9997833333333
V
0,1.8463134765625
V
-1,0
BOT
0,29.00645
V
0,1.82485580444336
V
-1,0
BOT
0,29.0131166666667
V
0,1.80721282958984
V
-1,0
BOT
0,29.0197833333333
V
0,1.79338455200195
V
-1,0
BOT
0,29.02645
V
0,1.78289413452148
V
-1,0
BOT
0,29.0331166666667
V
0,1.77574157714844
V
-1,0
BOT
0,29.0397833333333
V
0,1.77145004272461
V
-1,0
BOT
0,29.04645
V
0,1.77001953125
V
-1,0
BOT
0,29.0531166666667
V
0,1.77145004272461
V
-1,0
BOT
0,29.0597833333333
V
0,1.77574157714844
V
-1,0
BOT
0,29.06645
V
0,1.78241729736328
V
-1,0
BOT
0,29.0731166666667
V
0,1.79052352905273
V
-1,0
BOT
0,29.0797833333333
V
0,1.800537109375
V
-1,0
BOT
0,29.08645
V
0,1.81007385253906
V
-1,0
BOT
0,29.0931166666667
V
0,1.81961059570312
V
-1,0
BOT
0,29.0997833333333
V
0,1.82723999023437
V
-1,0
BOT
0,29.10645
V
0,1.83248519897461
V
-1,0
BOT
0,29.1131166666667
V
0,1.83486938476562
V
-1,0
BOT
0,29.1197833333333
V
0,1.83391571044922
V
-1,0
BOT
0,29.12645
V
0,1.82914733886719
V
-1,0
BOT
0,29.1331166666667
V
0,1.82056427001953
V
-1,0
BOT
0,29.1397833333333
V
0,1.80768966674805
V
-1,0
BOT
0,29.14645
V
0,1.79100036621094
V
-1,0
BOT
0,29.1531166666667
V
0,1.7704963684082
V
-1,0
BOT
0,29.1597833333333
V
0,1.74665451049805
V
-1,0
BOT
0,29.16645
V
0,1.71995162963867
V
-1,0
BOT
0,29.1731166666667
V
0,1.69086456298828
V
-1,0
BOT
0,29.1797833333333
V
0,1.65987014770508
V
-1,0
BOT
0,29.18645
V
0,1.62839889526367
V
-1,0
BOT
0,29.1931166666667
V
0,1.59692764282227
V
-1,0
BOT
0,29.1997833333333
V
0,1.56641006469727
V
-1,0
BOT
0,29.20645
V
0,1.53779983520508
V
-1,0
BOT
0,29.2131166666667
V
0,1.51157379150391
V
-1,0
BOT
0,29.2197833333333
V
0,1.48868560791016
V
-1,0
BOT
0,29.22645
V
0,1.46865844726562
V
-1,0
BOT
0,29.2331166666667
V
0,1.45196914672852
V
-1,0
BOT
0,29.2397833333333
V
0,1.43861770629883
V
-1,0
BOT
0,29.24645
V
0,1.42860412597656
V
-1,0
BOT
0,29.2531166666667
V
0,1.42192840576172
V
-1,0
BOT
0,29.2597833333333
V
0,1.41811370849609
V
-1,0
BOT
0,29.26645
V
0,1.41668319702148
V
-1,0
BOT
0,29.2731166666667
V
0,1.4185905456543
V
-1,0
BOT
0,29.2797833333333
V
0,1.42288208007812
V
-1,0
BOT
0,29.28645
V
0,1.42955780029297
V
-1,0
BOT
0,29.2931166666667
V
0,1.43718719482422
V
-1,0
BOT
0,29.2997833333333
V
0,1.44672393798828
V
-1,0
BOT
0,29.30645
V
0,1.45816802978516
V
-1,0
BOT
0,29.3131166666667
V
0,1.47104263305664
V
-1,0
BOT
0,29.3197833333333
V
0,1.48391723632812
V
-1,0
BOT
0,29.32645
V
0,1.49774551391602
V
-1,0
BOT
0,29.3331166666667
V
0,1.51205062866211
V
-1,0
BOT
0,29.3397833333333
V
0,1.5263557434082
V
-1,0
BOT
0,29.34645
V
0,1.5416145324707
V
-1,0
BOT
0,29.3531166666667
V
0,1.556396484375
V
-1,0
BOT
0,29.3597833333333
V
0,1.5711784362793
V
-1,0
BOT
0,29.36645
V
0,1.5864372253418
V
-1,0
BOT
0,29.3731166666667
V
0,1.60121917724609
V
-1,0
BOT
0,29.3797833333333
V
0,1.61552429199219
V
-1,0
BOT
0,29.38645
V
0,1.62887573242187
V
-1,0
BOT
0,29.3931166666667
V
0,1.64127349853516
V
-1,0
BOT
0,29.3997833333333
V
0,1.65271759033203
V
-1,0
BOT
0,29.40645
V
0,1.6627311706543
V
-1,0
BOT
0,29.4131166666667
V
0,1.67083740234375
V
-1,0
BOT
0,29.4197833333333
V
0,1.67655944824219
V
-1,0
BOT
0,29.42645
V
0,1.6789436340332
V
-1,0
BOT
0,29.4331166666667
V
0,1.67703628540039
V
-1,0
BOT
0,29.4397833333333
V
0,1.67131423950195
V
-1,0
BOT
0,29.44645
V
0,1.66082382202148
V
-1,0
BOT
0,29.4531166666667
V
0,1.64651870727539
V
-1,0
BOT
0,29.4597833333333
V
0,1.62792205810547
V
-1,0
BOT
0,29.46645
V
0,1.60598754882812
V
-1,0
BOT
0,29.4731166666667
V
0,1.58023834228516
V
-1,0
BOT
0,29.4797833333333
V
0,1.55210494995117
V
-1,0
BOT
0,29.48645
V
0,1.52111053466797
V
-1,0
BOT
0,29.4931166666667
V
0,1.48820877075195
V
-1,0
BOT
0,29.4997833333333
V
0,1.45339965820312
V
-1,0
BOT
0,29.50645
V
0,1.41716003417969
V
-1,0
BOT
0,29.5131166666667
V
0,1.38044357299805
V
-1,0
BOT
0,29.5197833333333
V
0,1.34372711181641
V
-1,0
BOT
0,29.52645
V
0,1.30796432495117
V
-1,0
BOT
0,29.5331166666667
V
0,1.27410888671875
V
-1,0
BOT
0,29.5397833333333
V
0,1.24216079711914
V
-1,0
BOT
0,29.54645
V
0,1.21307373046875
V
-1,0
BOT
0,29.5531166666667
V
0,1.18780136108398
V
-1,0
BOT
0,29.5597833333333
V
0,1.16539001464844
V
-1,0
BOT
0,29.56645
V
0,1.14727020263672
V
-1,0
BOT
0,29.5731166666667
V
0,1.13344192504883
V
-1,0
BOT
0,29.5797833333333
V
0,1.12485885620117
V
-1,0
BOT
0,29.58645
V
0,1.12390518188477
V
-1,0
BOT
0,29.5931166666667
V
0,1.13153457641602
V
-1,0
BOT
0,29.5997833333333
V
0,1.15108489990234
V
-1,0
BOT
0,29.60645
V
0,1.18398666381836
V
-1,0
BOT
0,29.6131166666667
V
0,1.23357772827148
V
-1,0
BOT
0,29.6197833333333
V
0,1.30319595336914
V
-1,0
BOT
0,29.62645
V
0,1.39760971069336
V
-1,0
BOT
0,29.6331166666667
V
0,1.52111053466797
V
-1,0
BOT
0,29.6397833333333
V
0,1.67989730834961
V
-1,0
BOT
0,29.64645
V
0,1.87921524047852
V
-1,0
BOT
0,29.6531166666667
V
0,2.12621688842773
V
-1,0
BOT
0,29.6597833333333
V
0,2.4261474609375
V
-1,0
BOT
0,29.66645
V
0,2.78615951538086
V
-1,0
BOT
0,29.6731166666667
V
0,3.21102142333984
V
-1,0
BOT
0,29.6797833333333
V
0,3.70550155639648
V
-1,0
BOT
0,29.68645
V
0,4.27436828613281
V
-1,0
BOT
0,29.6931166666667
V
0,4.92000579833984
V
-1,0
BOT
0,29.6997833333333
V
0,5.64241409301758
V
-1,0
BOT
0,29.70645
V
0,6.4396858215332
V
-1,0
BOT
0,29.7131166666667
V
0,7.30705261230469
V
-1,0
BOT
0,29.7197833333333
V
0,8.23783874511719
V
-1,0
BOT
0,29.72645
V
0,9.22203063964844
V
-1,0
BOT
0,29.7331166666667
V
0,10.2462768554687
V
-1,0
BOT
0,29.7397833333333
V
0,11.2953186035156
V
-1,0
BOT
0,29.74645
V
0,12.3515129089355
V
-1,0
BOT
0,29.7531166666667
V
0,13.3943557739258
V
-1,0
BOT
0,29.7597833333333
V
0,14.4023895263672
V
-1,0
BOT
0,29.76645
V
0,15.3541564941406
V
-1,0
BOT
0,29.7731166666667
V
0,16.228199005127
V
-1,0
BOT
0,29.7797833333333
V
0,17.003059387207
V
-1,0
BOT
0,29.78645
V
0,17.6615715026855
V
-1,0
BOT
0,29.7931166666667
V
0,18.1875228881836
V
-1,0
BOT
0,29.7997833333333
V
0,18.5689926147461
V
-1,0
BOT
0,29.80645
V
0,18.7969207763672
V
-1,0
BOT
0,29.8131166666667
V
0,18.8684463500977
V
-1,0
BOT
0,29.8197833333333
V
0,18.7835693359375
V
-1,0
BOT
0,29.82645
V
0,18.5484886169434
V
-1,0
BOT
0,29.8331166666667
V
0,18.1717872619629
V
-1,0
BOT
0,29.8397833333333
V
0,17.6668167114258
V
-1,0
BOT
0,29.84645
V
0,17.0493125915527
V
-1,0
BOT
0,29.8531166666667
V
0,16.3359642028809
V
-1,0
BOT
0,29.8597833333333
V
0,15.5458450317383
V
-1,0
BOT
0,29.86645
V
0,14.6980285644531
V
-1,0
BOT
0,29.8731166666667
V
0,13.8106346130371
V
-1,0
BOT
0,29.8797833333333
V
0,12.9013061523437
V
-1,0
BOT
0,29.88645
V
0,11.986255645752
V
-1,0
BOT
0,29.8931166666667
V
0,11.0797882080078
V
-1,0
BOT
0,29.8997833333333
V
0,10.1943016052246
V
-1,0
BOT
0,29.90645
V
0,9.33837890625
V
-1,0
BOT
0,29.9131166666667
V
0,8.52108001708984
V
-1,0
BOT
0,29.9197833333333
V
0,7.74669647216797
V
-1,0
BOT
0,29.92645
V
0,7.01999664306641
V
-1,0
BOT
0,29.9331166666667
V
0,6.34288787841797
V
-1,0
BOT
0,29.9397833333333
V
0,5.71584701538086
V
-1,0
BOT
0,29.94645
V
0,5.14030456542969
V
-1,0
BOT
0,29.9531166666667
V
0,4.61435317993164
V
-1,0
BOT
0,29.9597833333333
V
0,4.13703918457031
V
-1,0
BOT
0,29.96645
V
0,3.70550155639648
V
-1,0
BOT
0,29.9731166666667
V
0,3.31783294677734
V
-1,0
BOT
0,29.9797833333333
V
0,2.97069549560547
V
-1,0
BOT
0,29.98645
V
0,2.66122817993164
V
-1,0
BOT
0,29.9931166666667
V
0,2.38561630249023
V
-1,0
BOT
0,29.9997833333333
V
0,2.14099884033203
V
-1,0
BOT
0,30.00645
V
0,1.92546844482422
V
-1,0
BOT
0,30.0131166666667
V
0,1.73568725585937
V
-1,0
BOT
0,30.0197833333333
V
0,1.56927108764648
V
-1,0
BOT
0,30.02645
V
0,1.42383575439453
V
-1,0
BOT
0,30.0331166666667
V
0,1.29795074462891
V
-1,0
BOT
0,30.0397833333333
V
0,1.18875503540039
V
-1,0
BOT
0,30.04645
V
0,1.09481811523437
V
-1,0
BOT
0,30.0531166666667
V
0,1.01470947265625
V
-1,0
BOT
0,30.0597833333333
V
0,0.946521759033203
V
-1,0
BOT
0,30.06645
V
0,0.888347625732422
V
-1,0
BOT
0,30.0731166666667
V
0,0.838756561279297
V
-1,0
BOT
0,30.0797833333333
V
0,0.797271728515625
V
-1,0
BOT
0,30.08645
V
0,0.762939453125
V
-1,0
BOT
0,30.0931166666667
V
0,0.734806060791016
V
-1,0
BOT
0,30.0997833333333
V
0,0.711441040039063
V
-1,0
BOT
0,30.10645
V
0,0.693321228027344
V
-1,0
BOT
0,30.1131166666667
V
0,0.679969787597656
V
-1,0
BOT
0,30.1197833333333
V
0,0.669956207275391
V
-1,0
BOT
0,30.12645
V
0,0.662803649902344
V
-1,0
BOT
0,30.1331166666667
V
0,0.658512115478516
V
-1,0
BOT
0,30.1397833333333
V
0,0.655651092529297
V
-1,0
BOT
0,30.14645
V
0,0.654697418212891
V
-1,0
BOT
0,30.1531166666667
V
0,0.654697418212891
V
-1,0
BOT
0,30.1597833333333
V
0,0.655651092529297
V
-1,0
BOT
0,30.16645
V
0,0.657081604003906
V
-1,0
BOT
0,30.1731166666667
V
0,0.658988952636719
V
-1,0
BOT
0,30.1797833333333
V
0,0.661849975585938
V
-1,0
BOT
0,30.18645
V
0,0.664234161376953
V
-1,0
BOT
0,30.1931166666667
V
0,0.666618347167969
V
-1,0
BOT
0,30.1997833333333
V
0,0.669002532958984
V
-1,0
BOT
0,30.20645
V
0,0.671863555908203
V
-1,0
BOT
0,30.2131166666667
V
0,0.674247741699219
V
-1,0
BOT
0,30.2197833333333
V
0,0.676631927490234
V
-1,0
BOT
0,30.22645
V
0,0.678539276123047
V
-1,0
BOT
0,30.2331166666667
V
0,0.680446624755859
V
-1,0
BOT
0,30.2397833333333
V
0,0.682353973388672
V
-1,0
BOT
0,30.24645
V
0,0.683307647705078
V
-1,0
BOT
0,30.2531166666667
V
0,0.683784484863281
V
-1,0
BOT
0,30.2597833333333
V
0,0.683784484863281
V
-1,0
BOT
0,30.26645
V
0,0.683307647705078
V
-1,0
BOT
0,30.2731166666667
V
0,0.683307647705078
V
-1,0
BOT
0,30.2797833333333
V
0,0.684261322021484
V
-1,0
BOT
0,30.28645
V
0,0.6866455078125
V
-1,0
BOT
0,30.2931166666667
V
0,0.689983367919922
V
-1,0
BOT
0,30.2997833333333
V
0,0.695228576660156
V
-1,0
BOT
0,30.30645
V
0,0.703811645507813
V
-1,0
BOT
0,30.3131166666667
V
0,0.716209411621094
V
-1,0
BOT
0,30.3197833333333
V
0,0.734329223632813
V
-1,0
BOT
0,30.32645
V
0,0.758171081542969
V
-1,0
BOT
0,30.3331166666667
V
0,0.790596008300781
V
-1,0
BOT
0,30.3397833333333
V
0,0.833034515380859
V
-1,0
BOT
0,30.34645
V
0,0.886917114257813
V
-1,0
BOT
0,30.3531166666667
V
0,0.955581665039063
V
-1,0
BOT
0,30.3597833333333
V
0,1.04045867919922
V
-1,0
BOT
0,30.36645
V
0,1.1448860168457
V
-1,0
BOT
0,30.3731166666667
V
0,1.27124786376953
V
-1,0
BOT
0,30.3797833333333
V
0,1.42097473144531
V
-1,0
BOT
0,30.38645
V
0,1.59692764282227
V
-1,0
BOT
0,30.3931166666667
V
0,1.8000602722168
V
-1,0
BOT
0,30.3997833333333
V
0,2.03084945678711
V
-1,0
BOT
0,30.40645
V
0,2.288818359375
V
-1,0
BOT
0,30.4131166666667
V
0,2.57349014282227
V
-1,0
BOT
0,30.4197833333333
V
0,2.8834342956543
V
-1,0
BOT
0,30.42645
V
0,3.21578979492187
V
-1,0
BOT
0,30.4331166666667
V
0,3.56721878051758
V
-1,0
BOT
0,30.4397833333333
V
0,3.93199920654297
V
-1,0
BOT
0,30.44645
V
0,4.30488586425781
V
-1,0
BOT
0,30.4531166666667
V
0,4.67729568481445
V
-1,0
BOT
0,30.4597833333333
V
0,5.04207611083984
V
-1,0
BOT
0,30.46645
V
0,5.39016723632813
V
-1,0
BOT
0,30.4731166666667
V
0,5.71346282958984
V
-1,0
BOT
0,30.4797833333333
V
0,6.00290298461914
V
-1,0
BOT
0,30.48645
V
0,6.25085830688477
V
-1,0
BOT
0,30.4931166666667
V
0,6.45065307617188
V
-1,0
BOT
0,30.4997833333333
V
0,6.59608840942383
V
-1,0
BOT
0,30.50645
V
0,6.68191909790039
V
-1,0
BOT
0,30.5131166666667
V
0,6.70671463012695
V
-1,0
BOT
0,30.5197833333333
V
0,6.66999816894531
V
-1,0
BOT
0,30.52645
V
0,6.57224655151367
V
-1,0
BOT
0,30.5331166666667
V
0,6.41775131225586
V
-1,0
BOT
0,30.5397833333333
V
0,6.21128082275391
V
-1,0
BOT
0,30.54645
V
0,5.95903396606445
V
-1,0
BOT
0,30.5531166666667
V
0,5.66864013671875
V
-1,0
BOT
0,30.5597833333333
V
0,5.34820556640625
V
-1,0
BOT
0,30.56645
V
0,5.00631332397461
V
-1,0
BOT
0,30.5731166666667
V
0,4.65202331542969
V
-1,0
BOT
0,30.5797833333333
V
0,4.29439544677734
V
-1,0
BOT
0,30.58645
V
0,3.94058227539062
V
-1,0
BOT
0,30.5931166666667
V
0,3.59725952148437
V
-1,0
BOT
0,30.5997833333333
V
0,3.26967239379883
V
-1,0
BOT
0,30.60645
V
0,2.96258926391602
V
-1,0
BOT
0,30.6131166666667
V
0,2.67934799194336
V
-1,0
BOT
0,30.6197833333333
V
0,2.42233276367187
V
-1,0
BOT
0,30.62645
V
0,2.19249725341797
V
-1,0
BOT
0,30.6331166666667
V
0,1.99079513549805
V
-1,0
BOT
0,30.6397833333333
V
0,1.8162727355957
V
-1,0
BOT
0,30.64645
V
0,1.66797637939453
V
-1,0
BOT
0,30.6531166666667
V
0,1.54590606689453
V
-1,0
BOT
0,30.6597833333333
V
0,1.44720077514648
V
-1,0
BOT
0,30.66645
V
0,1.37090682983398
V
-1,0
BOT
0,30.6731166666667
V
0,1.31607055664062
V
-1,0
BOT
0,30.6797833333333
V
0,1.2812614440918
V
-1,0
BOT
0,30.68645
V
0,1.26409530639648
V
-1,0
BOT
0,30.6931166666667
V
0,1.26266479492187
V
-1,0
BOT
0,30.6997833333333
V
0,1.27553939819336
V
-1,0
BOT
0,30.70645
V
0,1.30176544189453
V
-1,0
BOT
0,30.7131166666667
V
0,1.33943557739258
V
-1,0
BOT
0,30.7197833333333
V
0,1.38759613037109
V
-1,0
BOT
0,30.72645
V
0,1.44624710083008
V
-1,0
BOT
0,30.7331166666667
V
0,1.51348114013672
V
-1,0
BOT
0,30.7397833333333
V
0,1.58882141113281
V
-1,0
BOT
0,30.74645
V
0,1.66988372802734
V
-1,0
BOT
0,30.7531166666667
V
0,1.7552375793457
V
-1,0
BOT
0,30.7597833333333
V
0,1.84202194213867
V
-1,0
BOT
0,30.76645
V
0,1.92832946777344
V
-1,0
BOT
0,30.7731166666667
V
0,2.01177597045898
V
-1,0
BOT
0,30.7797833333333
V
0,2.0899772644043
V
-1,0
BOT
0,30.78645
V
0,2.16007232666016
V
-1,0
BOT
0,30.7931166666667
V
0,2.22015380859375
V
-1,0
BOT
0,30.7997833333333
V
0,2.26831436157227
V
-1,0
BOT
0,30.80645
V
0,2.30216979980469
V
-1,0
BOT
0,30.8131166666667
V
0,2.32124328613281
V
-1,0
BOT
0,30.8197833333333
V
0,2.32362747192383
V
-1,0
BOT
0,30.82645
V
0,2.30884552001953
V
-1,0
BOT
0,30.8331166666667
V
0,2.27689743041992
V
-1,0
BOT
0,30.8397833333333
V
0,2.2282600402832
V
-1,0
BOT
0,30.84645
V
0,2.16293334960937
V
-1,0
BOT
0,30.8531166666667
V
0,2.08282470703125
V
-1,0
BOT
0,30.8597833333333
V
0,1.98888778686523
V
-1,0
BOT
0,30.86645
V
0,1.88446044921875
V
-1,0
BOT
0,30.8731166666667
V
0,1.77145004272461
V
-1,0
BOT
0,30.8797833333333
V
0,1.65271759033203
V
-1,0
BOT
0,30.88645
V
0,1.53112411499023
V
-1,0
BOT
0,30.8931166666667
V
0,1.40857696533203
V
-1,0
BOT
0,30.8997833333333
V
0,1.28793716430664
V
-1,0
BOT
0,30.90645
V
0,1.17111206054687
V
-1,0
BOT
0,30.9131166666667
V
0,1.05905532836914
V
-1,0
BOT
0,30.9197833333333
V
0,0.953197479248047
V
-1,0
BOT
0,30.92645
V
0,0.854015350341797
V
-1,0
BOT
0,30.9331166666667
V
0,0.762462615966797
V
-1,0
BOT
0,30.9397833333333
V
0,0.679492950439453
V
-1,0
BOT
0,30.94645
V
0,0.604629516601563
V
-1,0
BOT
0,30.9531166666667
V
0,0.537872314453125
V
-1,0
BOT
0,30.9597833333333
V
0,0.478744506835938
V
-1,0
BOT
0,30.96645
V
0,0.427722930908203
V
-1,0
BOT
0,30.9731166666667
V
0,0.383377075195312
V
-1,0
BOT
0,30.9797833333333
V
0,0.344276428222656
V
-1,0
BOT
0,30.98645
V
0,0.310420989990234
V
-1,0
BOT
0,30.9931166666667
V
0,0.280857086181641
V
-1,0
BOT
0,30.9997833333333
V
0,0.255107879638672
V
-1,0
BOT
0,31.00645
V
0,0.232696533203125
V
-1,0
BOT
0,31.0131166666667
V
0,0.213623046875
V
-1,0
BOT
0,31.0197833333333
V
0,0.197410583496094
V
-1,0
BOT
0,31.02645
V
0,0.184059143066406
V
-1,0
BOT
0,31.0331166666667
V
0,0.172138214111328
V
-1,0
BOT
0,31.0397833333333
V
0,0.162601470947266
V
-1,0
BOT
0,31.04645
V
0,0.154495239257812
V
-1,0
BOT
0,31.0531166666667
V
0,0.147819519042969
V
-1,0
BOT
0,31.0597833333333
V
0,0.142574310302734
V
-1,0
BOT
0,31.06645
V
0,0.138759613037109
V
-1,0
BOT
0,31.0731166666667
V
0,0.136375427246094
V
-1,0
BOT
0,31.0797833333333
V
0,0.135421752929687
V
-1,0
BOT
0,31.08645
V
0,0.136375427246094
V
-1,0
BOT
0,31.0931166666667
V
0,0.139236450195312
V
-1,0
BOT
0,31.0997833333333
V
0,0.143527984619141
V
-1,0
BOT
0,31.10645
V
0,0.149250030517578
V
-1,0
BOT
0,31.1131166666667
V
0,0.156402587890625
V
-1,0
BOT
0,31.1197833333333
V
0,0.165462493896484
V
-1,0
BOT
0,31.12645
V
0,0.176906585693359
V
-1,0
BOT
0,31.1331166666667
V
0,0.190258026123047
V
-1,0
BOT
0,31.1397833333333
V
0,0.20599365234375
V
-1,0
BOT
0,31.14645
V
0,0.223636627197266
V
-1,0
BOT
0,31.1531166666667
V
0,0.243663787841797
V
-1,0
BOT
0,31.1597833333333
V
0,0.265121459960937
V
-1,0
BOT
0,31.16645
V
0,0.288963317871094
V
-1,0
BOT
0,31.1731166666667
V
0,0.314235687255859
V
-1,0
BOT
0,31.1797833333333
V
0,0.340461730957031
V
-1,0
BOT
0,31.18645
V
0,0.368595123291016
V
-1,0
BOT
0,31.1931166666667
V
0,0.397682189941406
V
-1,0
BOT
0,31.1997833333333
V
0,0.428199768066406
V
-1,0
BOT
0,31.20645
V
0,0.459671020507813
V
-1,0
BOT
0,31.2131166666667
V
0,0.491142272949219
V
-1,0
BOT
0,31.2197833333333
V
0,0.523090362548828
V
-1,0
BOT
0,31.22645
V
0,0.554084777832031
V
-1,0
BOT
0,31.2331166666667
V
0,0.584125518798828
V
-1,0
BOT
0,31.2397833333333
V
0,0.612735748291016
V
-1,0
BOT
0,31.24645
V
0,0.638484954833984
V
-1,0
BOT
0,31.2531166666667
V
0,0.662326812744141
V
-1,0
BOT
0,31.2597833333333
V
0,0.683784484863281
V
-1,0
BOT
0,31.26645
V
0,0.702857971191406
V
-1,0
BOT
0,31.2731166666667
V
0,0.717639923095703
V
-1,0
BOT
0,31.2797833333333
V
0,0.729084014892578
V
-1,0
BOT
0,31.28645
V
0,0.736713409423828
V
-1,0
BOT
0,31.2931166666667
V
0,0.740528106689453
V
-1,0
BOT
0,31.2997833333333
V
0,0.740528106689453
V
-1,0
BOT
0,31.30645
V
0,0.737190246582031
V
-1,0
BOT
0,31.3131166666667
V
0,0.730037689208984
V
-1,0
BOT
0,31.3197833333333
V
0,0.719547271728516
V
-1,0
BOT
0,31.32645
V
0,0.706195831298828
V
-1,0
BOT
0,31.3331166666667
V
0,0.690460205078125
V
-1,0
BOT
0,31.3397833333333
V
0,0.672340393066406
V
-1,0
BOT
0,31.34645
V
0,0.652313232421875
V
-1,0
BOT
0,31.3531166666667
V
0,0.630855560302734
V
-1,0
BOT
0,31.3597833333333
V
0,0.607967376708984
V
-1,0
BOT
0,31.36645
V
0,0.584602355957031
V
-1,0
BOT
0,31.3731166666667
V
0,0.561237335205078
V
-1,0
BOT
0,31.3797833333333
V
0,0.538349151611328
V
-1,0
BOT
0,31.38645
V
0,0.515937805175781
V
-1,0
BOT
0,31.3931166666667
V
0,0.494956970214844
V
-1,0
BOT
0,31.3997833333333
V
0,0.474929809570313
V
-1,0
BOT
0,31.40645
V
0,0.456333160400391
V
-1,0
BOT
0,31.4131166666667
V
0,0.438690185546875
V
-1,0
BOT
0,31.4197833333333
V
0,0.421524047851563
V
-1,0
BOT
0,31.42645
V
0,0.404834747314453
V
-1,0
BOT
0,31.4331166666667
V
0,0.388145446777344
V
-1,0
BOT
0,31.4397833333333
V
0,0.371932983398437
V
-1,0
BOT
0,31.44645
V
0,0.355243682861328
V
-1,0
BOT
0,31.4531166666667
V
0,0.338554382324219
V
-1,0
BOT
0,31.4597833333333
V
0,0.321388244628906
V
-1,0
BOT
0,31.46645
V
0,0.303745269775391
V
-1,0
BOT
0,31.4731166666667
V
0,0.285625457763672
V
-1,0
BOT
0,31.4797833333333
V
0,0.26702880859375
V
-1,0
BOT
0,31.48645
V
0,0.247001647949219
V
-1,0
BOT
0,31.4931166666667
V
0,0.226497650146484
V
-1,0
BOT
0,31.4997833333333
V
0,0.205039978027344
V
-1,0
BOT
0,31.50645
V
0,0.18310546875
V
-1,0
BOT
0,31.5131166666667
V
0,0.160694122314453
V
-1,0
BOT
0,31.5197833333333
V
0,0.137805938720703
V
-1,0
BOT
0,31.52645
V
0,0.115871429443359
V
-1,0
BOT
0,31.5331166666667
V
0,0.0948905944824219
V
-1,0
BOT
0,31.5397833333333
V
0,0.0743865966796875
V
-1,0
BOT
0,31.54645
V
0,0.0548362731933594
V
-1,0
BOT
0,31.5531166666667
V
0,0.0367164611816406
V
-1,0
BOT
0,31.5597833333333
V
0,0.0214576721191406
V
-1,0
BOT
0,31.56645
V
0,0.00905990600585938
V
-1,0
BOT
0,31.5731166666667
V
0,0
V
-1,0
BOT
0,31.5797833333333
V
0,-0.00524520874023438
V
-1,0
BOT
0,31.58645
V
0,-0.00619888305664063
V
-1,0
BOT
0,31.5931166666667
V
0,-0.00238418579101562
V
-1,0
BOT
0,31.5997833333333
V
0,0.00715255737304688
V
-1,0
BOT
0,31.60645
V
0,0.0224113464355469
V
-1,0
BOT
0,31.6131166666667
V
0,0.0443458557128906
V
-1,0
BOT
0,31.6197833333333
V
0,0.0743865966796875
V
-1,0
BOT
0,31.62645
V
0,0.113487243652344
V
-1,0
BOT
0,31.6331166666667
V
0,0.162124633789062
V
-1,0
BOT
0,31.6397833333333
V
0,0.220775604248047
V
-1,0
BOT
0,31.64645
V
0,0.290393829345703
V
-1,0
BOT
0,31.6531166666667
V
0,0.371932983398437
V
-1,0
BOT
0,31.6597833333333
V
0,0.466346740722656
V
-1,0
BOT
0,31.66645
V
0,0.573635101318359
V
-1,0
BOT
0,31.6731166666667
V
0,0.694751739501953
V
-1,0
BOT
0,31.6797833333333
V
0,0.829696655273438
V
-1,0
BOT
0,31.68645
V
0,0.978469848632813
V
-1,0
BOT
0,31.6931166666667
V
0,1.14107131958008
V
-1,0
BOT
0,31.6997833333333
V
0,1.31654739379883
V
-1,0
BOT
0,31.70645
V
0,1.50489807128906
V
-1,0
BOT
0,31.7131166666667
V
0,1.70516967773437
V
-1,0
BOT
0,31.7197833333333
V
0,1.91640853881836
V
-1,0
BOT
0,31.72645
V
0,2.13718414306641
V
-1,0
BOT
0,31.7331166666667
V
0,2.3655891418457
V
-1,0
BOT
0,31.7397833333333
V
0,2.59876251220703
V
-1,0
BOT
0,31.74645
V
0,2.83527374267578
V
-1,0
BOT
0,31.7531166666667
V
0,3.07178497314453
V
-1,0
BOT
0,31.7597833333333
V
0,3.30495834350586
V
-1,0
BOT
0,31.76645
V
0,3.53240966796875
V
-1,0
BOT
0,31.7731166666667
V
0,3.75080108642578
V
-1,0
BOT
0,31.7797833333333
V
0,3.95727157592773
V
-1,0
BOT
0,31.78645
V
0,4.14848327636719
V
-1,0
BOT
0,31.7931166666667
V
0,4.32109832763672
V
-1,0
BOT
0,31.7997833333333
V
0,4.47368621826172
V
-1,0
BOT
0,31.80645
V
0,4.60290908813477
V
-1,0
BOT
0,31.8131166666667
V
0,4.70685958862305
V
-1,0
BOT
0,31.8197833333333
V
0,4.78410720825195
V
-1,0
BOT
0,31.82645
V
0,4.83322143554688
V
-1,0
BOT
0,31.8331166666667
V
0,4.85324859619141
V
-1,0
BOT
0,31.8397833333333
V
0,4.84323501586914
V
-1,0
BOT
0,31.84645
V
0,4.80413436889648
V
-1,0
BOT
0,31.8531166666667
V
0,4.73642349243164
V
-1,0
BOT
0,31.8597833333333
V
0,4.64153289794922
V
-1,0
BOT
0,31.86645
V
0,4.52089309692383
V
-1,0
BOT
0,31.8731166666667
V
0,4.37688827514648
V
-1,0
BOT
0,31.8797833333333
V
0,4.2119026184082
V
-1,0
BOT
0,31.88645
V
0,4.0283203125
V
-1,0
BOT
0,31.8931166666667
V
0,3.82900238037109
V
-1,0
BOT
0,31.8997833333333
V
0,3.61728668212891
V
-1,0
BOT
0,31.90645
V
0,3.39651107788086
V
-1,0
BOT
0,31.9131166666667
V
0,3.16905975341797
V
-1,0
BOT
0,31.9197833333333
V
0,2.93779373168945
V
-1,0
BOT
0,31.92645
V
0,2.70509719848633
V
-1,0
BOT
0,31.9331166666667
V
0,2.47478485107422
V
-1,0
BOT
0,31.9397833333333
V
0,2.24828720092773
V
-1,0
BOT
0,31.94645
V
0,2.02798843383789
V
-1,0
BOT
0,31.9531166666667
V
0,1.8153190612793
V
-1,0
BOT
0,31.9597833333333
V
0,1.61218643188477
V
-1,0
BOT
0,31.96645
V
0,1.4185905456543
V
-1,0
BOT
0,31.9731166666667
V
0,1.2359619140625
V
-1,0
BOT
0,31.9797833333333
V
0,1.06477737426758
V
-1,0
BOT
0,31.98645
V
0,0.905990600585938
V
-1,0
BOT
0,31.9931166666667
V
0,0.759124755859375
V
-1,0
BOT
0,31.9997833333333
V
0,0.623703002929688
V
-1,0
BOT
0,32.00645
V
0,0.500202178955078
V
-1,0
BOT
0,32.0131166666667
V
0,0.388145446777344
V
-1,0
BOT
0,32.0197833333333
V
0,0.286579132080078
V
-1,0
BOT
0,32.02645
V
0,0.195026397705078
V
-1,0
BOT
0,32.0331166666667
V
0,0.113010406494141
V
-1,0
BOT
0,32.0397833333333
V
0,0.0400543212890625
V
-1,0
BOT
0,32.04645
V
0,-0.0243186950683594
V
-1,0
BOT
0,32.0531166666667
V
0,-0.0810623168945313
V
-1,0
BOT
0,32.0597833333333
V
0,-0.131130218505859
V
-1,0
BOT
0,32.06645
V
0,-0.174522399902344
V
-1,0
BOT
0,32.0731166666667
V
0,-0.212192535400391
V
-1,0
BOT
0,32.0797833333333
V
0,-0.244617462158203
V
-1,0
BOT
0,32.08645
V
0,-0.271797180175781
V
-1,0
BOT
0,32.0931166666667
V
0,-0.295162200927734
V
-1,0
BOT
0,32.0997833333333
V
0,-0.314235687255859
V
-1,0
BOT
0,32.10645
V
0,-0.329017639160156
V
-1,0
BOT
0,32.1131166666667
V
0,-0.340938568115234
V
-1,0
BOT
0,32.1197833333333
V
0,-0.350475311279297
V
-1,0
BOT
0,32.12645
V
0,-0.358104705810547
V
-1,0
BOT
0,32.1331166666667
V
0,-0.363349914550781
V
-1,0
BOT
0,32.1397833333333
V
0,-0.368118286132812
V
-1,0
BOT
0,32.14645
V
0,-0.371932983398437
V
-1,0
BOT
0,32.1531166666667
V
0,-0.375270843505859
V
-1,0
BOT
0,32.1597833333333
V
0,-0.377178192138672
V
-1,0
BOT
0,32.16645
V
0,-0.379562377929687
V
-1,0
BOT
0,32.1731166666667
V
0,-0.381946563720703
V
-1,0
BOT
0,32.1797833333333
V
0,-0.384807586669922
V
-1,0
BOT
0,32.18645
V
0,-0.387668609619141
V
-1,0
BOT
0,32.1931166666667
V
0,-0.391483306884766
V
-1,0
BOT
0,32.1997833333333
V
0,-0.394821166992187
V
-1,0
BOT
0,32.20645
V
0,-0.398159027099609
V
-1,0
BOT
0,32.2131166666667
V
0,-0.401496887207031
V
-1,0
BOT
0,32.2197833333333
V
0,-0.40435791015625
V
-1,0
BOT
0,32.22645
V
0,-0.407218933105469
V
-1,0
BOT
0,32.2331166666667
V
0,-0.409126281738281
V
-1,0
BOT
0,32.2397833333333
V
0,-0.410556793212891
V
-1,0
BOT
0,32.24645
V
0,-0.410556793212891
V
-1,0
BOT
0,32.2531166666667
V
0,-0.408172607421875
V
-1,0
BOT
0,32.2597833333333
V
0,-0.402927398681641
V
-1,0
BOT
0,32.26645
V
0,-0.394821166992187
V
-1,0
BOT
0,32.2731166666667
V
0,-0.382423400878906
V
-1,0
BOT
0,32.2797833333333
V
0,-0.3662109375
V
-1,0
BOT
0,32.28645
V
0,-0.345706939697266
V
-1,0
BOT
0,32.2931166666667
V
0,-0.3204345703125
V
-1,0
BOT
0,32.2997833333333
V
0,-0.2899169921875
V
-1,0
BOT
0,32.30645
V
0,-0.254631042480469
V
-1,0
BOT
0,32.3131166666667
V
0,-0.214099884033203
V
-1,0
BOT
0,32.3197833333333
V
0,-0.168800354003906
V
-1,0
BOT
0,32.32645
V
0,-0.118732452392578
V
-1,0
BOT
0,32.3331166666667
V
0,-0.0643730163574219
V
-1,0
BOT
0,32.3397833333333
V
0,-0.00619888305664063
V
-1,0
BOT
0,32.34645
V
0,0.0557899475097656
V
-1,0
BOT
0,32.3531166666667
V
0,0.119686126708984
V
-1,0
BOT
0,32.3597833333333
V
0,0.185012817382812
V
-1,0
BOT
0,32.36645
V
0,0.250339508056641
V
-1,0
BOT
0,32.3731166666667
V
0,0.314712524414062
V
-1,0
BOT
0,32.3797833333333
V
0,0.377655029296875
V
-1,0
BOT
0,32.38645
V
0,0.436782836914063
V
-1,0
BOT
0,32.3931166666667
V
0,0.491142272949219
V
-1,0
BOT
0,32.3997833333333
V
0,0.539302825927734
V
-1,0
BOT
0,32.40645
V
0,0.580310821533203
V
-1,0
BOT
0,32.4131166666667
V
0,0.613212585449219
V
-1,0
BOT
0,32.4197833333333
V
0,0.636577606201172
V
-1,0
BOT
0,32.42645
V
0,0.649929046630859
V
-1,0
BOT
0,32.4331166666667
V
0,0.652790069580078
V
-1,0
BOT
0,32.4397833333333
V
0,0.645160675048828
V
-1,0
BOT
0,32.44645
V
0,0.628471374511719
V
-1,0
BOT
0,32.4531166666667
V
0,0.60272216796875
V
-1,0
BOT
0,32.4597833333333
V
0,0.568389892578125
V
-1,0
BOT
0,32.46645
V
0,0.52642822265625
V
-1,0
BOT
0,32.4731166666667
V
0,0.478744506835938
V
-1,0
BOT
0,32.4797833333333
V
0,0.426292419433594
V
-1,0
BOT
0,32.48645
V
0,0.369071960449219
V
-1,0
BOT
0,32.4931166666667
V
0,0.309467315673828
V
-1,0
BOT
0,32.4997833333333
V
0,0.247955322265625
V
-1,0
BOT
0,32.50645
V
0,0.186443328857422
V
-1,0
BOT
0,32.5131166666667
V
0,0.124454498291016
V
-1,0
BOT
0,32.5197833333333
V
0,0.0638961791992188
V
-1,0
BOT
0,32.52645
V
0,0.00524520874023438
V
-1,0
BOT
0,32.5331166666667
V
0,-0.0510215759277344
V
-1,0
BOT
0,32.5397833333333
V
0,-0.104904174804687
V
-1,0
BOT
0,32.54645
V
0,-0.155448913574219
V
-1,0
BOT
0,32.5531166666667
V
0,-0.202178955078125
V
-1,0
BOT
0,32.5597833333333
V
0,-0.245094299316406
V
-1,0
BOT
0,32.56645
V
0,-0.284671783447266
V
-1,0
BOT
0,32.5731166666667
V
0,-0.320911407470703
V
-1,0
BOT
0,32.5797833333333
V
0,-0.353813171386719
V
-1,0
BOT
0,32.58645
V
0,-0.383377075195312
V
-1,0
BOT
0,32.5931166666667
V
0,-0.410556793212891
V
-1,0
BOT
0,32.5997833333333
V
0,-0.43487548828125
V
-1,0
BOT
0,32.60645
V
0,-0.456333160400391
V
-1,0
BOT
0,32.6131166666667
V
0,-0.475406646728516
V
-1,0
BOT
0,32.6197833333333
V
0,-0.491619110107422
V
-1,0
BOT
0,32.62645
V
0,-0.506401062011719
V
-1,0
BOT
0,32.6331166666667
V
0,-0.519752502441406
V
-1,0
BOT
0,32.6397833333333
V
0,-0.531196594238281
V
-1,0
BOT
0,32.64645
V
0,-0.541210174560547
V
-1,0
BOT
0,32.6531166666667
V
0,-0.549793243408203
V
-1,0
BOT
0,32.6597833333333
V
0,-0.55694580078125
V
-1,0
BOT
0,32.66645
V
0,-0.563144683837891
V
-1,0
BOT
0,32.6731166666667
V
0,-0.567436218261719
V
-1,0
BOT
0,32.6797833333333
V
0,-0.570774078369141
V
-1,0
BOT
0,32.68645
V
0,-0.573158264160156
V
-1,0
BOT
0,32.6931166666667
V
0,-0.574588775634766
V
-1,0
BOT
0,32.6997833333333
V
0,-0.575065612792969
V
-1,0
BOT
0,32.70645
V
0,-0.574111938476563
V
-1,0
BOT
0,32.7131166666667
V
0,-0.573158264160156
V
-1,0
BOT
0,32.7197833333333
V
0,-0.571250915527344
V
-1,0
BOT
0,32.72645
V
0,-0.568866729736328
V
-1,0
BOT
0,32.7331166666667
V
0,-0.566482543945313
V
-1,0
BOT
0,32.7397833333333
V
0,-0.564098358154297
V
-1,0
BOT
0,32.74645
V
0,-0.560760498046875
V
-1,0
BOT
0,32.7531166666667
V
0,-0.55694580078125
V
-1,0
BOT
0,32.7597833333333
V
0,-0.552177429199219
V
-1,0
BOT
0,32.76645
V
0,-0.546455383300781
V
-1,0
BOT
0,32.7731166666667
V
0,-0.539779663085938
V
-1,0
BOT
0,32.7797833333333
V
0,-0.532627105712891
V
-1,0
BOT
0,32.78645
V
0,-0.524997711181641
V
-1,0
BOT
0,32.7931166666667
V
0,-0.516891479492188
V
-1,0
BOT
0,32.7997833333333
V
0,-0.507831573486328
V
-1,0
BOT
0,32.80645
V
0,-0.498294830322266
V
-1,0
BOT
0,32.8131166666667
V
0,-0.487327575683594
V
-1,0
BOT
0,32.8197833333333
V
0,-0.475406646728516
V
-1,0
BOT
0,32.82645
V
0,-0.462055206298828
V
-1,0
BOT
0,32.8331166666667
V
0,-0.448226928710938
V
-1,0
BOT
0,32.8397833333333
V
0,-0.433921813964844
V
-1,0
BOT
0,32.84645
V
0,-0.418663024902344
V
-1,0
BOT
0,32.8531166666667
V
0,-0.403404235839844
V
-1,0
BOT
0,32.8597833333333
V
0,-0.388145446777344
V
-1,0
BOT
0,32.86645
V
0,-0.37384033203125
V
-1,0
BOT
0,32.8731166666667
V
0,-0.360012054443359
V
-1,0
BOT
0,32.8797833333333
V
0,-0.347137451171875
V
-1,0
BOT
0,32.88645
V
0,-0.335216522216797
V
-1,0
BOT
0,32.8931166666667
V
0,-0.325679779052734
V
-1,0
BOT
0,32.8997833333333
V
0,-0.317573547363281
V
-1,0
BOT
0,32.90645
V
0,-0.311374664306641
V
-1,0
BOT
0,32.9131166666667
V
0,-0.306606292724609
V
-1,0
BOT
0,32.9197833333333
V
0,-0.303268432617187
V
-1,0
BOT
0,32.92645
V
0,-0.301837921142578
V
-1,0
BOT
0,32.9331166666667
V
0,-0.301837921142578
V
-1,0
BOT
0,32.9397833333333
V
0,-0.303268432617187
V
-1,0
BOT
0,32.94645
V
0,-0.30517578125
V
-1,0
BOT
0,32.9531166666667
V
0,-0.307559967041016
V
-1,0
BOT
0,32.9597833333333
V
0,-0.308990478515625
V
-1,0
BOT
0,32.96645
V
0,-0.310420989990234
V
-1,0
BOT
0,32.9731166666667
V
0,-0.311851501464844
V
-1,0
BOT
0,32.9797833333333
V
0,-0.312328338623047
V
-1,0
BOT
0,32.98645
V
0,-0.311374664306641
V
-1,0
BOT
0,32.9931166666667
V
0,-0.309467315673828
V
-1,0
BOT
0,32.9997833333333
V
0,-0.306129455566406
V
-1,0
BOT
0,33.00645
V
0,-0.301361083984375
V
-1,0
BOT
0,33.0131166666667
V
0,-0.294208526611328
V
-1,0
BOT
0,33.0197833333333
V
0,-0.285148620605469
V
-1,0
BOT
0,33.02645
V
0,-0.274658203125
V
-1,0
BOT
0,33.0331166666667
V
0,-0.263214111328125
V
-1,0
BOT
0,33.0397833333333
V
0,-0.251293182373047
V
-1,0
BOT
0,33.04645
V
0,-0.237941741943359
V
-1,0
BOT
0,33.0531166666667
V
0,-0.224590301513672
V
-1,0
BOT
0,33.0597833333333
V
0,-0.211238861083984
V
-1,0
BOT
0,33.06645
V
0,-0.198841094970703
V
-1,0
BOT
0,33.0731166666667
V
0,-0.187397003173828
V
-1,0
BOT
0,33.0797833333333
V
0,-0.177383422851562
V
-1,0
BOT
0,33.08645
V
0,-0.169277191162109
V
-1,0
BOT
0,33.0931166666667
V
0,-0.163078308105469
V
-1,0
BOT
0,33.0997833333333
V
0,-0.159263610839844
V
-1,0
BOT
0,33.10645
V
0,-0.156879425048828
V
-1,0
BOT
0,33.1131166666667
V
0,-0.156402587890625
V
-1,0
BOT
0,33.1197833333333
V
0,-0.156879425048828
V
-1,0
BOT
0,33.12645
V
0,-0.157356262207031
V
-1,0
BOT
0,33.1331166666667
V
0,-0.157833099365234
V
-1,0
BOT
0,33.1397833333333
V
0,-0.157356262207031
V
-1,0
BOT
0,33.14645
V
0,-0.155448913574219
V
-1,0
BOT
0,33.1531166666667
V
0,-0.151634216308594
V
-1,0
BOT
0,33.1597833333333
V
0,-0.14495849609375
V
-1,0
BOT
0,33.16645
V
0,-0.134944915771484
V
-1,0
BOT
0,33.1731166666667
V
0,-0.121116638183594
V
-1,0
BOT
0,33.1797833333333
V
0,-0.102043151855469
V
-1,0
BOT
0,33.18645
V
0,-0.0772476196289063
V
-1,0
BOT
0,33.1931166666667
V
0,-0.0462532043457031
V
-1,0
BOT
0,33.1997833333333
V
0,-0.00810623168945313
V
-1,0
BOT
0,33.20645
V
0,0.0367164611816406
V
-1,0
BOT
0,33.2131166666667
V
0,0.0896453857421875
V
-1,0
BOT
0,33.2197833333333
V
0,0.150203704833984
V
-1,0
BOT
0,33.22645
V
0,0.218868255615234
V
-1,0
BOT
0,33.2331166666667
V
0,0.294208526611328
V
-1,0
BOT
0,33.2397833333333
V
0,0.376224517822266
V
-1,0
BOT
0,33.24645
V
0,0.464916229248047
V
-1,0
BOT
0,33.2531166666667
V
0,0.558376312255859
V
-1,0
BOT
0,33.2597833333333
V
0,0.6561279296875
V
-1,0
BOT
0,33.26645
V
0,0.756740570068359
V
-1,0
BOT
0,33.2731166666667
V
0,0.859260559082031
V
-1,0
BOT
0,33.2797833333333
V
0,0.961780548095703
V
-1,0
BOT
0,33.28645
V
0,1.06239318847656
V
-1,0
BOT
0,33.2931166666667
V
0,1.1591911315918
V
-1,0
BOT
0,33.2997833333333
V
0,1.251220703125
V
-1,0
BOT
0,33.30645
V
0,1.33609771728516
V
-1,0
BOT
0,33.3131166666667
V
0,1.41286849975586
V
-1,0
BOT
0,33.3197833333333
V
0,1.4801025390625
V
-1,0
BOT
0,33.32645
V
0,1.53589248657227
V
-1,0
BOT
0,33.3331166666667
V
0,1.58023834228516
V
-1,0
BOT
0,33.3397833333333
V
0,1.61123275756836
V
-1,0
BOT
0,33.34645
V
0,1.62887573242187
V
-1,0
BOT
0,33.3531166666667
V
0,1.6322135925293
V
-1,0
BOT
0,33.3597833333333
V
0,1.62076950073242
V
-1,0
BOT
0,33.36645
V
0,1.59597396850586
V
-1,0
BOT
0,33.3731166666667
V
0,1.55735015869141
V
-1,0
BOT
0,33.3797833333333
V
0,1.50632858276367
V
-1,0
BOT
0,33.38645
V
0,1.44338607788086
V
-1,0
BOT
0,33.3931166666667
V
0,1.36947631835937
V
-1,0
BOT
0,33.3997833333333
V
0,1.28602981567383
V
-1,0
BOT
0,33.40645
V
0,1.19495391845703
V
-1,0
BOT
0,33.4131166666667
V
0,1.0981559753418
V
-1,0
BOT
0,33.4197833333333
V
0,0.996112823486328
V
-1,0
BOT
0,33.42645
V
0,0.891208648681641
V
-1,0
BOT
0,33.4331166666667
V
0,0.784873962402344
V
-1,0
BOT
0,33.4397833333333
V
0,0.678539276123047
V
-1,0
BOT
0,33.44645
V
0,0.573158264160156
V
-1,0
BOT
0,33.4531166666667
V
0,0.469684600830078
V
-1,0
BOT
0,33.4597833333333
V
0,0.369071960449219
V
-1,0
BOT
0,33.46645
V
0,0.272274017333984
V
-1,0
BOT
0,33.4731166666667
V
0,0.179767608642578
V
-1,0
BOT
0,33.4797833333333
V
0,0.0920295715332031
V
-1,0
BOT
0,33.48645
V
0,0.0095367431640625
V
-1,0
BOT
0,33.4931166666667
V
0,-0.0672340393066406
V
-1,0
BOT
0,33.4997833333333
V
0,-0.1373291015625
V
-1,0
BOT
0,33.50645
V
0,-0.201225280761719
V
-1,0
BOT
0,33.5131166666667
V
0,-0.258922576904297
V
-1,0
BOT
0,33.5197833333333
V
0,-0.309467315673828
V
-1,0
BOT
0,33.52645
V
0,-0.353813171386719
V
-1,0
BOT
0,33.5331166666667
V
0,-0.391960144042969
V
-1,0
BOT
0,33.5397833333333
V
0,-0.424385070800781
V
-1,0
BOT
0,33.54645
V
0,-0.451087951660156
V
-1,0
BOT
0,33.5531166666667
V
0,-0.472545623779297
V
-1,0
BOT
0,33.5597833333333
V
0,-0.488758087158203
V
-1,0
BOT
0,33.56645
V
0,-0.500202178955078
V
-1,0
BOT
0,33.5731166666667
V
0,-0.506877899169922
V
-1,0
BOT
0,33.5797833333333
V
0,-0.509262084960938
V
-1,0
BOT
0,33.58645
V
0,-0.507831573486328
V
-1,0
BOT
0,33.5931166666667
V
0,-0.5035400390625
V
-1,0
BOT
0,33.5997833333333
V
0,-0.496864318847656
V
-1,0
BOT
0,33.60645
V
0,-0.48828125
V
-1,0
BOT
0,33.6131166666667
V
0,-0.478267669677734
V
-1,0
BOT
0,33.6197833333333
V
0,-0.467300415039063
V
-1,0
BOT
0,33.62645
V
0,-0.455379486083984
V
-1,0
BOT
0,33.6331166666667
V
0,-0.443458557128906
V
-1,0
BOT
0,33.6397833333333
V
0,-0.431060791015625
V
-1,0
BOT
0,33.64645
V
0,-0.419139862060547
V
-1,0
BOT
0,33.6531166666667
V
0,-0.406742095947266
V
-1,0
BOT
0,33.6597833333333
V
0,-0.394344329833984
V
-1,0
BOT
0,33.66645
V
0,-0.382900238037109
V
-1,0
BOT
0,33.6731166666667
V
0,-0.372886657714844
V
-1,0
BOT
0,33.6797833333333
V
0,-0.363826751708984
V
-1,0
BOT
0,33.68645
V
0,-0.357151031494141
V
-1,0
BOT
0,33.6931166666667
V
0,-0.352859497070312
V
-1,0
BOT
0,33.6997833333333
V
0,-0.351428985595703
V
-1,0
BOT
0,33.70645
V
0,-0.352382659912109
V
-1,0
BOT
0,33.7131166666667
V
0,-0.354766845703125
V
-1,0
BOT
0,33.7197833333333
V
0,-0.35858154296875
V
-1,0
BOT
0,33.72645
V
0,-0.364303588867187
V
-1,0
BOT
0,33.7331166666667
V
0,-0.371932983398437
V
-1,0
BOT
0,33.7397833333333
V
0,-0.380516052246094
V
-1,0
BOT
0,33.74645
V
0,-0.391006469726562
V
-1,0
BOT
0,33.7531166666667
V
0,-0.403404235839844
V
-1,0
BOT
0,33.7597833333333
V
0,-0.417709350585938
V
-1,0
BOT
0,33.76645
V
0,-0.433444976806641
V
-1,0
BOT
0,33.7731166666667
V
0,-0.450611114501953
V
-1,0
BOT
0,33.7797833333333
V
0,-0.468254089355469
V
-1,0
BOT
0,33.78645
V
0,-0.486373901367188
V
-1,0
BOT
0,33.7931166666667
V
0,-0.504970550537109
V
-1,0
BOT
0,33.7997833333333
V
0,-0.522613525390625
V
-1,0
BOT
0,33.80645
V
0,-0.539779663085938
V
-1,0
BOT
0,33.8131166666667
V
0,-0.555992126464844
V
-1,0
BOT
0,33.8197833333333
V
0,-0.57220458984375
V
-1,0
BOT
0,33.82645
V
0,-0.58746337890625
V
-1,0
BOT
0,33.8331166666667
V
0,-0.601768493652344
V
-1,0
BOT
0,33.8397833333333
V
0,-0.615596771240234
V
-1,0
BOT
0,33.84645
V
0,-0.628948211669922
V
-1,0
BOT
0,33.8531166666667
V
0,-0.641345977783203
V
-1,0
BOT
0,33.8597833333333
V
0,-0.652313232421875
V
-1,0
BOT
0,33.86645
V
0,-0.662326812744141
V
-1,0
BOT
0,33.8731166666667
V
0,-0.670909881591797
V
-1,0
BOT
0,33.8797833333333
V
0,-0.678539276123047
V
-1,0
BOT
0,33.88645
V
0,-0.685214996337891
V
-1,0
BOT
0,33.8931166666667
V
0,-0.690937042236328
V
-1,0
BOT
0,33.8997833333333
V
0,-0.696182250976563
V
-1,0
BOT
0,33.90645
V
0,-0.700950622558594
V
-1,0
BOT
0,33.9131166666667
V
0,-0.704765319824219
V
-1,0
BOT
0,33.9197833333333
V
0,-0.708580017089844
V
-1,0
BOT
0,33.92645
V
0,-0.711917877197266
V
-1,0
BOT
0,33.9331166666667
V
0,-0.714302062988281
V
-1,0
BOT
0,33.9397833333333
V
0,-0.716686248779297
V
-1,0
BOT
0,33.94645
V
0,-0.719070434570313
V
-1,0
BOT
0,33.9531166666667
V
0,-0.721454620361328
V
-1,0
BOT
0,33.9597833333333
V
0,-0.723361968994141
V
-1,0
BOT
0,33.96645
V
0,-0.725269317626953
V
-1,0
BOT
0,33.9731166666667
V
0,-0.727176666259766
V
-1,0
BOT
0,33.9797833333333
V
0,-0.729084014892578
V
-1,0
BOT
0,33.98645
V
0,-0.731945037841797
V
-1,0
BOT
0,33.9931166666667
V
0,-0.734329223632813
V
-1,0
BOT
0,33.9997833333333
V
0,-0.738143920898438
V
-1,0
BOT
0,34.00645
V
0,-0.742435455322266
V
-1,0
BOT
0,34.0131166666667
V
0,-0.747203826904297
V
-1,0
BOT
0,34.0197833333333
V
0,-0.752925872802734
V
-1,0
BOT
0,34.02645
V
0,-0.759124755859375
V
-1,0
BOT
0,34.0331166666667
V
0,-0.765800476074219
V
-1,0
BOT
0,34.0397833333333
V
0,-0.772953033447266
V
-1,0
BOT
0,34.04645
V
0,-0.779628753662109
V
-1,0
BOT
0,34.0531166666667
V
0,-0.78582763671875
V
-1,0
BOT
0,34.0597833333333
V
0,-0.792026519775391
V
-1,0
BOT
0,34.06645
V
0,-0.797748565673828
V
-1,0
BOT
0,34.0731166666667
V
0,-0.802993774414063
V
-1,0
BOT
0,34.0797833333333
V
0,-0.807762145996094
V
-1,0
BOT
0,34.08645
V
0,-0.812053680419922
V
-1,0
BOT
0,34.0931166666667
V
0,-0.815868377685547
V
-1,0
BOT
0,34.0997833333333
V
0,-0.818252563476563
V
-1,0
BOT
0,34.10645
V
0,-0.819206237792969
V
-1,0
BOT
0,34.1131166666667
V
0,-0.817775726318359
V
-1,0
BOT
0,34.1197833333333
V
0,-0.814914703369141
V
-1,0
BOT
0,34.12645
V
0,-0.810146331787109
V
-1,0
BOT
0,34.1331166666667
V
0,-0.802993774414063
V
-1,0
BOT
0,34.1397833333333
V
0,-0.79345703125
V
-1,0
BOT
0,34.14645
V
0,-0.782012939453125
V
-1,0
BOT
0,34.1531166666667
V
0,-0.767230987548828
V
-1,0
BOT
0,34.1597833333333
V
0,-0.748157501220703
V
-1,0
BOT
0,34.16645
V
0,-0.72479248046875
V
-1,0
BOT
0,34.1731166666667
V
0,-0.695705413818359
V
-1,0
BOT
0,34.1797833333333
V
0,-0.661373138427734
V
-1,0
BOT
0,34.18645
V
0,-0.620841979980469
V
-1,0
BOT
0,34.1931166666667
V
0,-0.573635101318359
V
-1,0
BOT
0,34.1997833333333
V
0,-0.519752502441406
V
-1,0
BOT
0,34.20645
V
0,-0.458717346191406
V
-1,0
BOT
0,34.2131166666667
V
0,-0.389575958251953
V
-1,0
BOT
0,34.2197833333333
V
0,-0.312328338623047
V
-1,0
BOT
0,34.22645
V
0,-0.226497650146484
V
-1,0
BOT
0,34.2331166666667
V
0,-0.132083892822266
V
-1,0
BOT
0,34.2397833333333
V
0,-0.0290870666503906
V
-1,0
BOT
0,34.24645
V
0,0.0815391540527344
V
-1,0
BOT
0,34.2531166666667
V
0,0.199317932128906
V
-1,0
BOT
0,34.2597833333333
V
0,0.323772430419922
V
-1,0
BOT
0,34.26645
V
0,0.453472137451172
V
-1,0
BOT
0,34.2731166666667
V
0,0.587940216064453
V
-1,0
BOT
0,34.2797833333333
V
0,0.72479248046875
V
-1,0
BOT
0,34.28645
V
0,0.863075256347656
V
-1,0
BOT
0,34.2931166666667
V
0,1.00135803222656
V
-1,0
BOT
0,34.2997833333333
V
0,1.13773345947266
V
-1,0
BOT
0,34.30645
V
0,1.26934051513672
V
-1,0
BOT
0,34.3131166666667
V
0,1.39522552490234
V
-1,0
BOT
0,34.3197833333333
V
0,1.51205062866211
V
-1,0
BOT
0,34.32645
V
0,1.617431640625
V
-1,0
BOT
0,34.3331166666667
V
0,1.71041488647461
V
-1,0
BOT
0,34.3397833333333
V
0,1.78813934326172
V
-1,0
BOT
0,34.34645
V
0,1.85012817382812
V
-1,0
BOT
0,34.3531166666667
V
0,1.89542770385742
V
-1,0
BOT
0,34.3597833333333
V
0,1.9230842590332
V
-1,0
BOT
0,34.36645
V
0,1.93262100219727
V
-1,0
BOT
0,34.3731166666667
V
0,1.92403793334961
V
-1,0
BOT
0,34.3797833333333
V
0,1.89685821533203
V
-1,0
BOT
0,34.38645
V
0,1.85251235961914
V
-1,0
BOT
0,34.3931166666667
V
0,1.79100036621094
V
-1,0
BOT
0,34.3997833333333
V
0,1.71518325805664
V
-1,0
BOT
0,34.40645
V
0,1.62601470947266
V
-1,0
BOT
0,34.4131166666667
V
0,1.52587890625
V
-1,0
BOT
0,34.4197833333333
V
0,1.41668319702148
V
-1,0
BOT
0,34.42645
V
0,1.30033493041992
V
-1,0
BOT
0,34.4331166666667
V
0,1.17874145507812
V
-1,0
BOT
0,34.4397833333333
V
0,1.05381011962891
V
-1,0
BOT
0,34.44645
V
0,0.927925109863281
V
-1,0
BOT
0,34.4531166666667
V
0,0.802040100097656
V
-1,0
BOT
0,34.4597833333333
V
0,0.678539276123047
V
-1,0
BOT
0,34.46645
V
0,0.558853149414063
V
-1,0
BOT
0,34.4731166666667
V
0,0.443458557128906
V
-1,0
BOT
0,34.4797833333333
V
0,0.332832336425781
V
-1,0
BOT
0,34.48645
V
0,0.227928161621094
V
-1,0
BOT
0,34.4931166666667
V
0,0.128746032714844
V
-1,0
BOT
0,34.4997833333333
V
0,0.0352859497070312
V
-1,0
BOT
0,34.50645
V
0,-0.0514984130859375
V
-1,0
BOT
0,34.5131166666667
V
0,-0.132083892822266
V
-1,0
BOT
0,34.5197833333333
V
0,-0.205516815185547
V
-1,0
BOT
0,34.52645
V
0,-0.272274017333984
V
-1,0
BOT
0,34.5331166666667
V
0,-0.333309173583984
V
-1,0
BOT
0,34.5397833333333
V
0,-0.387668609619141
V
-1,0
BOT
0,34.54645
V
0,-0.436782836914063
V
-1,0
BOT
0,34.5531166666667
V
0,-0.481128692626953
V
-1,0
BOT
0,34.5597833333333
V
0,-0.519752502441406
V
-1,0
BOT
0,34.56645
V
0,-0.554084777832031
V
-1,0
BOT
0,34.5731166666667
V
0,-0.584125518798828
V
-1,0
BOT
0,34.5797833333333
V
0,-0.609397888183594
V
-1,0
BOT
0,34.58645
V
0,-0.630855560302734
V
-1,0
BOT
0,34.5931166666667
V
0,-0.64849853515625
V
-1,0
BOT
0,34.5997833333333
V
0,-0.661849975585938
V
-1,0
BOT
0,34.60645
V
0,-0.670433044433594
V
-1,0
BOT
0,34.6131166666667
V
0,-0.674247741699219
V
-1,0
BOT
0,34.6197833333333
V
0,-0.673294067382813
V
-1,0
BOT
0,34.62645
V
0,-0.667095184326172
V
-1,0
BOT
0,34.6331166666667
V
0,-0.656604766845703
V
-1,0
BOT
0,34.6397833333333
V
0,-0.641345977783203
V
-1,0
BOT
0,34.64645
V
0,-0.621795654296875
V
-1,0
BOT
0,34.6531166666667
V
0,-0.598430633544922
V
-1,0
BOT
0,34.6597833333333
V
0,-0.57220458984375
V
-1,0
BOT
0,34.66645
V
0,-0.542163848876953
V
-1,0
BOT
0,34.6731166666667
V
0,-0.509738922119141
V
-1,0
BOT
0,34.6797833333333
V
0,-0.474929809570313
V
-1,0
BOT
0,34.68645
V
0,-0.439167022705078
V
-1,0
BOT
0,34.6931166666667
V
0,-0.402927398681641
V
-1,0
BOT
0,34.6997833333333
V
0,-0.366687774658203
V
-1,0
BOT
0,34.70645
V
0,-0.331878662109375
V
-1,0
BOT
0,34.7131166666667
V
0,-0.298976898193359
V
-1,0
BOT
0,34.7197833333333
V
0,-0.268459320068359
V
-1,0
BOT
0,34.72645
V
0,-0.241279602050781
V
-1,0
BOT
0,34.7331166666667
V
0,-0.217914581298828
V
-1,0
BOT
0,34.7397833333333
V
0,-0.1983642578125
V
-1,0
BOT
0,34.74645
V
0,-0.181674957275391
V
-1,0
BOT
0,34.7531166666667
V
0,-0.168323516845703
V
-1,0
BOT
0,34.7597833333333
V
0,-0.158309936523437
V
-1,0
BOT
0,34.76645
V
0,-0.150680541992187
V
-1,0
BOT
0,34.7731166666667
V
0,-0.14495849609375
V
-1,0
BOT
0,34.7797833333333
V
0,-0.140190124511719
V
-1,0
BOT
0,34.78645
V
0,-0.136375427246094
V
-1,0
BOT
0,34.7931166666667
V
0,-0.132083892822266
V
-1,0
BOT
0,34.7997833333333
V
0,-0.126361846923828
V
-1,0
BOT
0,34.80645
V
0,-0.117778778076172
V
-1,0
BOT
0,34.8131166666667
V
0,-0.105381011962891
V
-1,0
BOT
0,34.8197833333333
V
0,-0.0891685485839844
V
-1,0
BOT
0,34.82645
V
0,-0.0677108764648438
V
-1,0
BOT
0,34.8331166666667
V
0,-0.0410079956054688
V
-1,0
BOT
0,34.8397833333333
V
0,-0.00905990600585938
V
-1,0
BOT
0,34.84645
V
0,0.0271797180175781
V
-1,0
BOT
0,34.8531166666667
V
0,0.0681877136230469
V
-1,0
BOT
0,34.8597833333333
V
0,0.112056732177734
V
-1,0
BOT
0,34.86645
V
0,0.159740447998047
V
-1,0
BOT
0,34.8731166666667
V
0,0.208854675292969
V
-1,0
BOT
0,34.8797833333333
V
0,0.257968902587891
V
-1,0
BOT
0,34.88645
V
0,0.306129455566406
V
-1,0
BOT
0,34.8931166666667
V
0,0.352859497070312
V
-1,0
BOT
0,34.8997833333333
V
0,0.395774841308594
V
-1,0
BOT
0,34.90645
V
0,0.432968139648438
V
-1,0
BOT
0,34.9131166666667
V
0,0.463962554931641
V
-1,0
BOT
0,34.9197833333333
V
0,0.488758087158203
V
-1,0
BOT
0,34.92645
V
0,0.505924224853516
V
-1,0
BOT
0,34.9331166666667
V
0,0.514984130859375
V
-1,0
BOT
0,34.9397833333333
V
0,0.514984130859375
V
-1,0
BOT
0,34.94645
V
0,0.505924224853516
V
-1,0
BOT
0,34.9531166666667
V
0,0.48828125
V
-1,0
BOT
0,34.9597833333333
V
0,0.461578369140625
V
-1,0
BOT
0,34.96645
V
0,0.425338745117188
V
-1,0
BOT
0,34.9731166666667
V
0,0.3814697265625
V
-1,0
BOT
0,34.9797833333333
V
0,0.330924987792969
V
-1,0
BOT
0,34.98645
V
0,0.274658203125
V
-1,0
BOT
0,34.9931166666667
V
0,0.214099884033203
V
-1,0
BOT
0,34.9997833333333
V
0,0.149726867675781
V
-1,0
BOT
0,35.00645
V
0,0.0834465026855469
V
-1,0
BOT
0,35.0131166666667
V
0,0.0157356262207031
V
-1,0
BOT
0,35.0197833333333
V
0,-0.0529289245605469
V
-1,0
BOT
0,35.02645
V
0,-0.121116638183594
V
-1,0
BOT
0,35.0331166666667
V
0,-0.188350677490234
V
-1,0
BOT
0,35.0397833333333
V
0,-0.253677368164062
V
-1,0
BOT
0,35.04645
V
0,-0.316619873046875
V
-1,0
BOT
0,35.0531166666667
V
0,-0.376224517822266
V
-1,0
BOT
0,35.0597833333333
V
0,-0.431537628173828
V
-1,0
BOT
0,35.06645
V
0,-0.483036041259766
V
-1,0
BOT
0,35.0731166666667
V
0,-0.529289245605469
V
-1,0
BOT
0,35.0797833333333
V
0,-0.571727752685547
V
-1,0
BOT
0,35.08645
V
0,-0.608921051025391
V
-1,0
BOT
0,35.0931166666667
V
0,-0.641822814941406
V
-1,0
BOT
0,35.0997833333333
V
0,-0.670433044433594
V
-1,0
BOT
0,35.10645
V
0,-0.694751739501953
V
-1,0
BOT
0,35.1131166666667
V
0,-0.715255737304688
V
-1,0
BOT
0,35.1197833333333
V
0,-0.730991363525391
V
-1,0
BOT
0,35.12645
V
0,-0.742912292480469
V
-1,0
BOT
0,35.1331166666667
V
0,-0.750541687011719
V
-1,0
BOT
0,35.1397833333333
V
0,-0.754833221435547
V
-1,0
BOT
0,35.14645
V
0,-0.755786895751953
V
-1,0
BOT
0,35.1531166666667
V
0,-0.753402709960938
V
-1,0
BOT
0,35.1597833333333
V
0,-0.748157501220703
V
-1,0
BOT
0,35.16645
V
0,-0.741004943847656
V
-1,0
BOT
0,35.1731166666667
V
0,-0.731468200683594
V
-1,0
BOT
0,35.1797833333333
V
0,-0.720024108886719
V
-1,0
BOT
0,35.18645
V
0,-0.706672668457031
V
-1,0
BOT
0,35.1931166666667
V
0,-0.691890716552734
V
-1,0
BOT
0,35.1997833333333
V
0,-0.675678253173828
V
-1,0
BOT
0,35.20645
V
0,-0.658988952636719
V
-1,0
BOT
0,35.2131166666667
V
0,-0.642776489257813
V
-1,0
BOT
0,35.2197833333333
V
0,-0.626564025878906
V
-1,0
BOT
0,35.22645
V
0,-0.611782073974609
V
-1,0
BOT
0,35.2331166666667
V
0,-0.598907470703125
V
-1,0
BOT
0,35.2397833333333
V
0,-0.587940216064453
V
-1,0
BOT
0,35.24645
V
0,-0.579833984375
V
-1,0
BOT
0,35.2531166666667
V
0,-0.574111938476563
V
-1,0
BOT
0,35.2597833333333
V
0,-0.570774078369141
V
-1,0
BOT
0,35.26645
V
0,-0.570774078369141
V
-1,0
BOT
0,35.2731166666667
V
0,-0.573158264160156
V
-1,0
BOT
0,35.2797833333333
V
0,-0.578403472900391
V
-1,0
BOT
0,35.28645
V
0,-0.586032867431641
V
-1,0
BOT
0,35.2931166666667
V
0,-0.596046447753906
V
-1,0
BOT
0,35.2997833333333
V
0,-0.607967376708984
V
-1,0
BOT
0,35.30645
V
0,-0.622272491455078
V
-1,0
BOT
0,35.3131166666667
V
0,-0.637531280517578
V
-1,0
BOT
0,35.3197833333333
V
0,-0.654697418212891
V
-1,0
BOT
0,35.32645
V
0,-0.672817230224609
V
-1,0
BOT
0,35.3331166666667
V
0,-0.692367553710938
V
-1,0
BOT
0,35.3397833333333
V
0,-0.711917877197266
V
-1,0
BOT
0,35.34645
V
0,-0.731945037841797
V
-1,0
BOT
0,35.3531166666667
V
0,-0.751495361328125
V
-1,0
BOT
0,35.3597833333333
V
0,-0.771045684814453
V
-1,0
BOT
0,35.36645
V
0,-0.790119171142578
V
-1,0
BOT
0,35.3731166666667
V
0,-0.808238983154297
V
-1,0
BOT
0,35.3797833333333
V
0,-0.825405120849609
V
-1,0
BOT
0,35.38645
V
0,-0.842571258544922
V
-1,0
BOT
0,35.3931166666667
V
0,-0.859260559082031
V
-1,0
BOT
0,35.3997833333333
V
0,-0.874996185302734
V
-1,0
BOT
0,35.40645
V
0,-0.889778137207031
V
-1,0
BOT
0,35.4131166666667
V
0,-0.902652740478516
V
-1,0
BOT
0,35.4197833333333
V
0,-0.914096832275391
V
-1,0
BOT
0,35.42645
V
0,-0.924587249755859
V
-1,0
BOT
0,35.4331166666667
V
0,-0.933647155761719
V
-1,0
BOT
0,35.4397833333333
V
0,-0.942230224609375
V
-1,0
BOT
0,35.44645
V
0,-0.950336456298828
V
-1,0
BOT
0,35.4531166666667
V
0,-0.957489013671875
V
-1,0
BOT
0,35.4597833333333
V
0,-0.964164733886719
V
-1,0
BOT
0,35.46645
V
0,-0.970363616943359
V
-1,0
BOT
0,35.4731166666667
V
0,-0.976085662841797
V
-1,0
BOT
0,35.4797833333333
V
0,-0.980854034423828
V
-1,0
BOT
0,35.48645
V
0,-0.985145568847656
V
-1,0
BOT
0,35.4931166666667
V
0,-0.988960266113281
V
-1,0
BOT
0,35.4997833333333
V
0,-0.992774963378906
V
-1,0
BOT
0,35.50645
V
0,-0.996112823486328
V
-1,0
BOT
0,35.5131166666667
V
0,-0.99945068359375
V
-1,0
BOT
0,35.5197833333333
V
0,-1.00231170654297
V
-1,0
BOT
0,35.52645
V
0,-1.00421905517578
V
-1,0
BOT
0,35.5331166666667
V
0,-1.00564956665039
V
-1,0
BOT
0,35.5397833333333
V
0,-1.007080078125
V
-1,0
BOT
0,35.54645
V
0,-1.00803375244141
V
-1,0
BOT
0,35.5531166666667
V
0,-1.00851058959961
V
-1,0
BOT
0,35.5597833333333
V
0,-1.00946426391602
V
-1,0
BOT
0,35.56645
V
0,-1.01041793823242
V
-1,0
BOT
0,35.5731166666667
V
0,-1.01137161254883
V
-1,0
BOT
0,35.5797833333333
V
0,-1.01184844970703
V
-1,0
BOT
0,35.58645
V
0,-1.01184844970703
V
-1,0
BOT
0,35.5931166666667
V
0,-1.01184844970703
V
-1,0
BOT
0,35.5997833333333
V
0,-1.01137161254883
V
-1,0
BOT
0,35.60645
V
0,-1.01137161254883
V
-1,0
BOT
0,35.6131166666667
V
0,-1.01137161254883
V
-1,0
BOT
0,35.6197833333333
V
0,-1.01184844970703
V
-1,0
BOT
0,35.62645
V
0,-1.01184844970703
V
-1,0
BOT
0,35.6331166666667
V
0,-1.01137161254883
V
-1,0
BOT
0,35.6397833333333
V
0,-1.01089477539062
V
-1,0
BOT
0,35.64645
V
0,-1.01041793823242
V
-1,0
BOT
0,35.6531166666667
V
0,-1.00994110107422
V
-1,0
BOT
0,35.6597833333333
V
0,-1.00946426391602
V
-1,0
BOT
0,35.66645
V
0,-1.00946426391602
V
-1,0
BOT
0,35.6731166666667
V
0,-1.00994110107422
V
-1,0
BOT
0,35.6797833333333
V
0,-1.01041793823242
V
-1,0
BOT
0,35.68645
V
0,-1.01041793823242
V
-1,0
BOT
0,35.6931166666667
V
0,-1.01041793823242
V
-1,0
BOT
0,35.6997833333333
V
0,-1.01041793823242
V
-1,0
BOT
0,35.70645
V
0,-1.00994110107422
V
-1,0
BOT
0,35.7131166666667
V
0,-1.00898742675781
V
-1,0
BOT
0,35.7197833333333
V
0,-1.0075569152832
V
-1,0
BOT
0,35.72645
V
0,-1.00564956665039
V
-1,0
BOT
0,35.7331166666667
V
0,-1.00374221801758
V
-1,0
BOT
0,35.7397833333333
V
0,-1.00135803222656
V
-1,0
BOT
0,35.74645
V
0,-0.998973846435547
V
-1,0
BOT
0,35.7531166666667
V
0,-0.996112823486328
V
-1,0
BOT
0,35.7597833333333
V
0,-0.993728637695313
V
-1,0
BOT
0,35.76645
V
0,-0.9918212890625
V
-1,0
BOT
0,35.7731166666667
V
0,-0.990390777587891
V
-1,0
BOT
0,35.7797833333333
V
0,-0.988960266113281
V
-1,0
BOT
0,35.78645
V
0,-0.988006591796875
V
-1,0
BOT
0,35.7931166666667
V
0,-0.987052917480469
V
-1,0
BOT
0,35.7997833333333
V
0,-0.986576080322266
V
-1,0
BOT
0,35.80645
V
0,-0.986576080322266
V
-1,0
BOT
0,35.8131166666667
V
0,-0.987052917480469
V
-1,0
BOT
0,35.8197833333333
V
0,-0.988483428955078
V
-1,0
BOT
0,35.82645
V
0,-0.990390777587891
V
-1,0
BOT
0,35.8331166666667
V
0,-0.992774963378906
V
-1,0
BOT
0,35.8397833333333
V
0,-0.995635986328125
V
-1,0
BOT
0,35.84645
V
0,-0.998497009277344
V
-1,0
BOT
0,35.8531166666667
V
0,-1.00135803222656
V
-1,0
BOT
0,35.8597833333333
V
0,-1.00421905517578
V
-1,0
BOT
0,35.86645
V
0,-1.00803375244141
V
-1,0
BOT
0,35.8731166666667
V
0,-1.01184844970703
V
-1,0
BOT
0,35.8797833333333
V
0,-1.01613998413086
V
-1,0
BOT
0,35.88645
V
0,-1.02090835571289
V
-1,0
BOT
0,35.8931166666667
V
0,-1.02615356445312
V
-1,0
BOT
0,35.8997833333333
V
0,-1.03139877319336
V
-1,0
BOT
0,35.90645
V
0,-1.03664398193359
V
-1,0
BOT
0,35.9131166666667
V
0,-1.04093551635742
V
-1,0
BOT
0,35.9197833333333
V
0,-1.04475021362305
V
-1,0
BOT
0,35.92645
V
0,-1.04808807373047
V
-1,0
BOT
0,35.9331166666667
V
0,-1.05142593383789
V
-1,0
BOT
0,35.9397833333333
V
0,-1.05428695678711
V
-1,0
BOT
0,35.94645
V
0,-1.05714797973633
V
-1,0
BOT
0,35.9531166666667
V
0,-1.05905532836914
V
-1,0
BOT
0,35.9597833333333
V
0,-1.06143951416016
V
-1,0
BOT
0,35.96645
V
0,-1.06287002563477
V
-1,0
BOT
0,35.9731166666667
V
0,-1.06430053710937
V
-1,0
BOT
0,35.9797833333333
V
0,-1.06525421142578
V
-1,0
BOT
0,35.98645
V
0,-1.06620788574219
V
-1,0
BOT
0,35.9931166666667
V
0,-1.06716156005859
V
-1,0
BOT
0,35.9997833333333
V
0,-1.06716156005859
V
-1,0
BOT
0,36.00645
V
0,-1.06716156005859
V
-1,0
BOT
0,36.0131166666667
V
0,-1.0676383972168
V
-1,0
BOT
0,36.0197833333333
V
0,-1.0685920715332
V
-1,0
BOT
0,36.02645
V
0,-1.07002258300781
V
-1,0
BOT
0,36.0331166666667
V
0,-1.07192993164062
V
-1,0
BOT
0,36.0397833333333
V
0,-1.07431411743164
V
-1,0
BOT
0,36.04645
V
0,-1.07622146606445
V
-1,0
BOT
0,36.0531166666667
V
0,-1.07765197753906
V
-1,0
BOT
0,36.0597833333333
V
0,-1.07812881469727
V
-1,0
BOT
0,36.06645
V
0,-1.07812881469727
V
-1,0
BOT
0,36.0731166666667
V
0,-1.07812881469727
V
-1,0
BOT
0,36.0797833333333
V
0,-1.07860565185547
V
-1,0
BOT
0,36.08645
V
0,-1.07955932617187
V
-1,0
BOT
0,36.0931166666667
V
0,-1.08098983764648
V
-1,0
BOT
0,36.0997833333333
V
0,-1.08242034912109
V
-1,0
BOT
0,36.10645
V
0,-1.0838508605957
V
-1,0
BOT
0,36.1131166666667
V
0,-1.08528137207031
V
-1,0
BOT
0,36.1197833333333
V
0,-1.08671188354492
V
-1,0
BOT
0,36.12645
V
0,-1.08766555786133
V
-1,0
BOT
0,36.1331166666667
V
0,-1.08861923217773
V
-1,0
BOT
0,36.1397833333333
V
0,-1.08957290649414
V
-1,0
BOT
0,36.14645
V
0,-1.08957290649414
V
-1,0
BOT
0,36.1531166666667
V
0,-1.09004974365234
V
-1,0
BOT
0,36.1597833333333
V
0,-1.08957290649414
V
-1,0
BOT
0,36.16645
V
0,-1.08957290649414
V
-1,0
BOT
0,36.1731166666667
V
0,-1.08957290649414
V
-1,0
BOT
0,36.1797833333333
V
0,-1.08957290649414
V
-1,0
BOT
0,36.18645
V
0,-1.08909606933594
V
-1,0
BOT
0,36.1931166666667
V
0,-1.08861923217773
V
-1,0
BOT
0,36.1997833333333
V
0,-1.08814239501953
V
-1,0
BOT
0,36.20645
V
0,-1.08766555786133
V
-1,0
BOT
0,36.2131166666667
V
0,-1.08718872070312
V
-1,0
BOT
0,36.2197833333333
V
0,-1.08718872070312
V
-1,0
BOT
0,36.22645
V
0,-1.08718872070312
V
-1,0
BOT
0,36.2331166666667
V
0,-1.08718872070312
V
-1,0
BOT
0,36.2397833333333
V
0,-1.08671188354492
V
-1,0
BOT
0,36.24645
V
0,-1.08671188354492
V
-1,0
BOT
0,36.2531166666667
V
0,-1.08575820922852
V
-1,0
BOT
0,36.2597833333333
V
0,-1.08432769775391
V
-1,0
BOT
0,36.26645
V
0,-1.0828971862793
V
-1,0
BOT
0,36.2731166666667
V
0,-1.08146667480469
V
-1,0
BOT
0,36.2797833333333
V
0,-1.08051300048828
V
-1,0
BOT
0,36.28645
V
0,-1.07860565185547
V
-1,0
BOT
0,36.2931166666667
V
0,-1.07717514038086
V
-1,0
BOT
0,36.2997833333333
V
0,-1.07574462890625
V
-1,0
BOT
0,36.30645
V
0,-1.07431411743164
V
-1,0
BOT
0,36.3131166666667
V
0,-1.07288360595703
V
-1,0
BOT
0,36.3197833333333
V
0,-1.07145309448242
V
-1,0
BOT
0,36.32645
V
0,-1.07049942016602
V
-1,0
BOT
0,36.3331166666667
V
0,-1.06954574584961
V
-1,0
BOT
0,36.3397833333333
V
0,-1.06906890869141
V
-1,0
BOT
0,36.34645
V
0,-1.06906890869141
V
-1,0
BOT
0,36.3531166666667
V
0,-1.06954574584961
V
-1,0
BOT
0,36.3597833333333
V
0,-1.07097625732422
V
-1,0
BOT
0,36.36645
V
0,-1.07336044311523
V
-1,0
BOT
0,36.3731166666667
V
0,-1.07574462890625
V
-1,0
BOT
0,36.3797833333333
V
0,-1.07860565185547
V
-1,0
BOT
0,36.38645
V
0,-1.08146667480469
V
-1,0
BOT
0,36.3931166666667
V
0,-1.0838508605957
V
-1,0
BOT
0,36.3997833333333
V
0,-1.08671188354492
V
-1,0
BOT
0,36.40645
V
0,-1.09004974365234
V
-1,0
BOT
0,36.4131166666667
V
0,-1.09338760375977
V
-1,0
BOT
0,36.4197833333333
V
0,-1.09672546386719
V
-1,0
BOT
0,36.42645
V
0,-1.10101699829102
V
-1,0
BOT
0,36.4331166666667
V
0,-1.10530853271484
V
-1,0
BOT
0,36.4397833333333
V
0,-1.11007690429687
V
-1,0
BOT
0,36.44645
V
0,-1.1143684387207
V
-1,0
BOT
0,36.4531166666667
V
0,-1.11865997314453
V
-1,0
BOT
0,36.4597833333333
V
0,-1.12295150756836
V
-1,0
BOT
0,36.46645
V
0,-1.12676620483398
V
-1,0
BOT
0,36.4731166666667
V
0,-1.13010406494141
V
-1,0
BOT
0,36.4797833333333
V
0,-1.13344192504883
V
-1,0
BOT
0,36.48645
V
0,-1.13630294799805
V
-1,0
BOT
0,36.4931166666667
V
0,-1.13916397094727
V
-1,0
BOT
0,36.4997833333333
V
0,-1.14250183105469
V
-1,0
BOT
0,36.50645
V
0,-1.14536285400391
V
-1,0
BOT
0,36.5131166666667
V
0,-1.14870071411133
V
-1,0
BOT
0,36.5197833333333
V
0,-1.15108489990234
V
-1,0
BOT
0,36.52645
V
0,-1.15346908569336
V
-1,0
BOT
0,36.5331166666667
V
0,-1.15537643432617
V
-1,0
BOT
0,36.5397833333333
V
0,-1.15728378295898
V
-1,0
BOT
0,36.54645
V
0,-1.1591911315918
V
-1,0
BOT
0,36.5531166666667
V
0,-1.16062164306641
V
-1,0
BOT
0,36.5597833333333
V
0,-1.16252899169922
V
-1,0
BOT
0,36.56645
V
0,-1.16395950317383
V
-1,0
BOT
0,36.5731166666667
V
0,-1.16491317749023
V
-1,0
BOT
0,36.5797833333333
V
0,-1.16539001464844
V
-1,0
BOT
0,36.58645
V
0,-1.16539001464844
V
-1,0
BOT
0,36.5931166666667
V
0,-1.16539001464844
V
-1,0
BOT
0,36.5997833333333
V
0,-1.16539001464844
V
-1,0
BOT
0,36.60645
V
0,-1.16539001464844
V
-1,0
BOT
0,36.6131166666667
V
0,-1.16491317749023
V
-1,0
BOT
0,36.6197833333333
V
0,-1.16491317749023
V
-1,0
BOT
0,36.62645
V
0,-1.16443634033203
V
-1,0
BOT
0,36.6331166666667
V
0,-1.16395950317383
V
-1,0
BOT
0,36.6397833333333
V
0,-1.16300582885742
V
-1,0
BOT
0,36.64645
V
0,-1.16205215454102
V
-1,0
BOT
0,36.6531166666667
V
0,-1.16109848022461
V
-1,0
BOT
0,36.6597833333333
V
0,-1.16062164306641
V
-1,0
BOT
0,36.66645
V
0,-1.15966796875
V
-1,0
BOT
0,36.6731166666667
V
0,-1.1591911315918
V
-1,0
BOT
0,36.6797833333333
V
0,-1.1591911315918
V
-1,0
BOT
0,36.68645
V
0,-1.1591911315918
V
-1,0
BOT
0,36.6931166666667
V
0,-1.15871429443359
V
-1,0
BOT
0,36.6997833333333
V
0,-1.15871429443359
V
-1,0
BOT
0,36.70645
V
0,-1.1591911315918
V
-1,0
BOT
0,36.7131166666667
V
0,-1.1591911315918
V
-1,0
BOT
0,36.7197833333333
V
0,-1.15966796875
V
-1,0
BOT
0,36.72645
V
0,-1.1601448059082
V
-1,0
BOT
0,36.7331166666667
V
0,-1.16062164306641
V
-1,0
BOT
0,36.7397833333333
V
0,-1.16157531738281
V
-1,0
BOT
0,36.74645
V
0,-1.16252899169922
V
-1,0
BOT
0,36.7531166666667
V
0,-1.16443634033203
V
-1,0
BOT
0,36.7597833333333
V
0,-1.16539001464844
V
-1,0
BOT
0,36.76645
V
0,-1.16634368896484
V
-1,0
BOT
0,36.7731166666667
V
0,-1.16729736328125
V
-1,0
BOT
0,36.7797833333333
V
0,-1.16872787475586
V
-1,0
BOT
0,36.78645
V
0,-1.16920471191406
V
-1,0
BOT
0,36.7931166666667
V
0,-1.16968154907227
V
-1,0
BOT
0,36.7997833333333
V
0,-1.16968154907227
V
-1,0
BOT
0,36.80645
V
0,-1.17015838623047
V
-1,0
BOT
0,36.8131166666667
V
0,-1.17015838623047
V
-1,0
BOT
0,36.8197833333333
V
0,-1.17015838623047
V
-1,0
BOT
0,36.82645
V
0,-1.16968154907227
V
-1,0
BOT
0,36.8331166666667
V
0,-1.16968154907227
V
-1,0
BOT
0,36.8397833333333
V
0,-1.17015838623047
V
-1,0
BOT
0,36.84645
V
0,-1.17063522338867
V
-1,0
BOT
0,36.8531166666667
V
0,-1.17111206054687
V
-1,0
BOT
0,36.8597833333333
V
0,-1.17206573486328
V
-1,0
BOT
0,36.86645
V
0,-1.17349624633789
V
-1,0
BOT
0,36.8731166666667
V
0,-1.1744499206543
V
-1,0
BOT
0,36.8797833333333
V
0,-1.1749267578125
V
-1,0
BOT
0,36.88645
V
0,-1.17588043212891
V
-1,0
BOT
0,36.8931166666667
V
0,-1.17683410644531
V
-1,0
BOT
0,36.8997833333333
V
0,-1.17778778076172
V
-1,0
BOT
0,36.90645
V
0,-1.17874145507812
V
-1,0
BOT
0,36.9131166666667
V
0,-1.17921829223633
V
-1,0
BOT
0,36.9197833333333
V
0,-1.17969512939453
V
-1,0
BOT
0,36.92645
V
0,-1.18064880371094
V
-1,0
BOT
0,36.9331166666667
V
0,-1.18160247802734
V
-1,0
BOT
0,36.9397833333333
V
0,-1.18207931518555
V
-1,0
BOT
0,36.94645
V
0,-1.18303298950195
V
-1,0
BOT
0,36.9531166666667
V
0,-1.18398666381836
V
-1,0
BOT
0,36.9597833333333
V
0,-1.18541717529297
V
-1,0
BOT
0,36.96645
V
0,-1.18637084960937
V
-1,0
BOT
0,36.9731166666667
V
0,-1.18684768676758
V
-1,0
BOT
0,36.9797833333333
V
0,-1.18684768676758
V
-1,0
BOT
0,36.98645
V
0,-1.18780136108398
V
-1,0
BOT
0,36.9931166666667
V
0,-1.18827819824219
V
-1,0
BOT
0,36.9997833333333
V
0,-1.18875503540039
V
-1,0
BOT
0,37.00645
V
0,-1.18923187255859
V
-1,0
BOT
0,37.0131166666667
V
0,-1.1897087097168
V
-1,0
BOT
0,37.0197833333333
V
0,-1.19113922119141
V
-1,0
BOT
0,37.02645
V
0,-1.19209289550781
V
-1,0
BOT
0,37.0331166666667
V
0,-1.19256973266602
V
-1,0
BOT
0,37.0397833333333
V
0,-1.19304656982422
V
-1,0
BOT
0,37.04645
V
0,-1.19304656982422
V
-1,0
BOT
0,37.0531166666667
V
0,-1.19256973266602
V
-1,0
BOT
0,37.0597833333333
V
0,-1.19209289550781
V
-1,0
BOT
0,37.06645
V
0,-1.19209289550781
V
-1,0
BOT
0,37.0731166666667
V
0,-1.19209289550781
V
-1,0
BOT
0,37.0797833333333
V
0,-1.19256973266602
V
-1,0
BOT
0,37.08645
V
0,-1.19352340698242
V
-1,0
BOT
0,37.0931166666667
V
0,-1.19352340698242
V
-1,0
BOT
0,37.0997833333333
V
0,-1.19352340698242
V
-1,0
BOT
0,37.10645
V
0,-1.19304656982422
V
-1,0
BOT
0,37.1131166666667
V
0,-1.19209289550781
V
-1,0
BOT
0,37.1197833333333
V
0,-1.19161605834961
V
-1,0
BOT
0,37.12645
V
0,-1.19113922119141
V
-1,0
BOT
0,37.1331166666667
V
0,-1.190185546875
V
-1,0
BOT
0,37.1397833333333
V
0,-1.18875503540039
V
-1,0
BOT
0,37.14645
V
0,-1.18780136108398
V
-1,0
BOT
0,37.1531166666667
V
0,-1.18637084960937
V
-1,0
BOT
0,37.1597833333333
V
0,-1.18494033813477
V
-1,0
BOT
0,37.16645
V
0,-1.18350982666016
V
-1,0
BOT
0,37.1731166666667
V
0,-1.18207931518555
V
-1,0
BOT
0,37.1797833333333
V
0,-1.18112564086914
V
-1,0
BOT
0,37.18645
V
0,-1.18017196655273
V
-1,0
BOT
0,37.1931166666667
V
0,-1.17921829223633
V
-1,0
BOT
0,37.1997833333333
V
0,-1.17826461791992
V
-1,0
BOT
0,37.20645
V
0,-1.17731094360352
V
-1,0
BOT
0,37.2131166666667
V
0,-1.17683410644531
V
-1,0
BOT
0,37.2197833333333
V
0,-1.1754035949707
V
-1,0
BOT
0,37.22645
V
0,-1.1744499206543
V
-1,0
BOT
0,37.2331166666667
V
0,-1.17301940917969
V
-1,0
BOT
0,37.2397833333333
V
0,-1.17111206054687
V
-1,0
BOT
0,37.24645
V
0,-1.16920471191406
V
-1,0
BOT
0,37.2531166666667
V
0,-1.16729736328125
V
-1,0
BOT
0,37.2597833333333
V
0,-1.16539001464844
V
-1,0
BOT
0,37.26645
V
0,-1.16300582885742
V
-1,0
BOT
0,37.2731166666667
V
0,-1.16062164306641
V
-1,0
BOT
0,37.2797833333333
V
0,-1.15776062011719
V
-1,0
BOT
0,37.28645
V
0,-1.15489959716797
V
-1,0
BOT
0,37.2931166666667
V
0,-1.15251541137695
V
-1,0
BOT
0,37.2997833333333
V
0,-1.14965438842773
V
-1,0
BOT
0,37.30645
V
0,-1.14727020263672
V
-1,0
BOT
0,37.3131166666667
V
0,-1.1448860168457
V
-1,0
BOT
0,37.3197833333333
V
0,-1.14250183105469
V
-1,0
BOT
0,37.32645
V
0,-1.14011764526367
V
-1,0
BOT
0,37.3331166666667
V
0,-1.13821029663086
V
-1,0
BOT
0,37.3397833333333
V
0,-1.13677978515625
V
-1,0
BOT
0,37.34645
V
0,-1.13487243652344
V
-1,0
BOT
0,37.3531166666667
V
0,-1.13391876220703
V
-1,0
BOT
0,37.3597833333333
V
0,-1.13296508789062
V
-1,0
BOT
0,37.36645
V
0,-1.13296508789062
V
-1,0
BOT
0,37.3731166666667
V
0,-1.13296508789062
V
-1,0
BOT
0,37.3797833333333
V
0,-1.13344192504883
V
-1,0
BOT
0,37.38645
V
0,-1.13439559936523
V
-1,0
BOT
0,37.3931166666667
V
0,-1.13630294799805
V
-1,0
BOT
0,37.3997833333333
V
0,-1.13821029663086
V
-1,0
BOT
0,37.40645
V
0,-1.14107131958008
V
-1,0
BOT
0,37.4131166666667
V
0,-1.1439323425293
V
-1,0
BOT
0,37.4197833333333
V
0,-1.14727020263672
V
-1,0
BOT
0,37.42645
V
0,-1.15108489990234
V
-1,0
BOT
0,37.4331166666667
V
0,-1.15442276000977
V
-1,0
BOT
0,37.4397833333333
V
0,-1.15728378295898
V
-1,0
BOT
0,37.44645
V
0,-1.16062164306641
V
-1,0
BOT
0,37.4531166666667
V
0,-1.16395950317383
V
-1,0
BOT
0,37.4597833333333
V
0,-1.16729736328125
V
-1,0
BOT
0,37.46645
V
0,-1.17063522338867
V
-1,0
BOT
0,37.4731166666667
V
0,-1.1744499206543
V
-1,0
BOT
0,37.4797833333333
V
0,-1.17778778076172
V
-1,0
BOT
0,37.48645
V
0,-1.18064880371094
V
-1,0
BOT
0,37.4931166666667
V
0,-1.18350982666016
V
-1,0
BOT
0,37.4997833333333
V
0,-1.18589401245117
V
-1,0
BOT
0,37.50645
V
0,-1.18780136108398
V
-1,0
BOT
0,37.5131166666667
V
0,-1.1897087097168
V
-1,0
BOT
0,37.5197833333333
V
0,-1.1906623840332
V
-1,0
BOT
0,37.52645
V
0,-1.19161605834961
V
-1,0
BOT
0,37.5331166666667
V
0,-1.19256973266602
V
-1,0
BOT
0,37.5397833333333
V
0,-1.19256973266602
V
-1,0
BOT
0,37.54645
V
0,-1.19256973266602
V
-1,0
BOT
0,37.5531166666667
V
0,-1.19209289550781
V
-1,0
BOT
0,37.5597833333333
V
0,-1.19209289550781
V
-1,0
BOT
0,37.56645
V
0,-1.19161605834961
V
-1,0
BOT
0,37.5731166666667
V
0,-1.1906623840332
V
-1,0
BOT
0,37.5797833333333
V
0,-1.1897087097168
V
-1,0
BOT
0,37.58645
V
0,-1.1897087097168
V
-1,0
BOT
0,37.5931166666667
V
0,-1.1897087097168
V
-1,0
BOT
0,37.5997833333333
V
0,-1.1897087097168
V
-1,0
BOT
0,37.60645
V
0,-1.1897087097168
V
-1,0
BOT
0,37.6131166666667
V
0,-1.18875503540039
V
-1,0
BOT
0,37.6197833333333
V
0,-1.18875503540039
V
-1,0
BOT
0,37.62645
V
0,-1.18827819824219
V
-1,0
BOT
0,37.6331166666667
V
0,-1.18780136108398
V
-1,0
BOT
0,37.6397833333333
V
0,-1.18684768676758
V
-1,0
BOT
0,37.64645
V
0,-1.18637084960937
V
-1,0
BOT
0,37.6531166666667
V
0,-1.18589401245117
V
-1,0
BOT
0,37.6597833333333
V
0,-1.18541717529297
V
-1,0
BOT
0,37.66645
V
0,-1.18446350097656
V
-1,0
BOT
0,37.6731166666667
V
0,-1.18255615234375
V
-1,0
BOT
0,37.6797833333333
V
0,-1.18017196655273
V
-1,0
BOT
0,37.68645
V
0,-1.17635726928711
V
-1,0
BOT
0,37.6931166666667
V
0,-1.17111206054687
V
-1,0
BOT
0,37.6997833333333
V
0,-1.16395950317383
V
-1,0
BOT
0,37.70645
V
0,-1.15394592285156
V
-1,0
BOT
0,37.7131166666667
V
0,-1.13964080810547
V
-1,0
BOT
0,37.7197833333333
V
0,-1.12056732177734
V
-1,0
BOT
0,37.72645
V
0,-1.09481811523437
V
-1,0
BOT
0,37.7331166666667
V
0,-1.06048583984375
V
-1,0
BOT
0,37.7397833333333
V
0,-1.01423263549805
V
-1,0
BOT
0,37.74645
V
0,-0.952243804931641
V
-1,0
BOT
0,37.7531166666667
V
0,-0.868797302246094
V
-1,0
BOT
0,37.7597833333333
V
0,-0.757694244384766
V
-1,0
BOT
0,37.76645
V
0,-0.608921051025391
V
-1,0
BOT
0,37.7731166666667
V
0,-0.411510467529297
V
-1,0
BOT
0,37.7797833333333
V
0,-0.150680541992187
V
-1,0
BOT
0,37.78645
V
0,0.191211700439453
V
-1,0
BOT
0,37.7931166666667
V
0,0.638008117675781
V
-1,0
BOT
0,37.7997833333333
V
0,1.21831893920898
V
-1,0
BOT
0,37.80645
V
0,1.9679069519043
V
-1,0
BOT
0,37.8131166666667
V
0,2.93064117431641
V
-1,0
BOT
0,37.8197833333333
V
0,4.16088104248047
V
-1,0
BOT
0,37.82645
V
0,5.72443008422852
V
-1,0
BOT
0,37.8331166666667
V
0,7.70044326782227
V
-1,0
BOT
0,37.8397833333333
V
0,10.1833343505859
V
-1,0
BOT
0,37.84645
V
0,13.2851600646973
V
-1,0
BOT
0,37.8531166666667
V
0,17.1380043029785
V
-1,0
BOT
0,37.8597833333333
V
0,21.8973159790039
V
-1,0
BOT
0,37.86645
V
0,27.7433395385742
V
-1,0
BOT
0,37.8731166666667
V
0,34.8825454711914
V
-1,0
BOT
0,37.8797833333333
V
0,43.5504913330078
V
-1,0
BOT
0,37.88645
V
0,54.0132522583008
V
-1,0
BOT
0,37.8931166666667
V
0,66.5717124938965
V
-1,0
BOT
0,37.8997833333333
V
0,81.5606117248535
V
-1,0
BOT
0,37.90645
V
0,99.3499755859375
V
-1,0
BOT
0,37.9131166666667
V
0,120.340347290039
V
-1,0
BOT
0,37.9197833333333
V
0,144.962787628174
V
-1,0
BOT
0,37.92645
V
0,173.677444458008
V
-1,0
BOT
0,37.9331166666667
V
0,206.973552703857
V
-1,0
BOT
0,37.9397833333333
V
0,245.358467102051
V
-1,0
BOT
0,37.94645
V
0,289.351463317871
V
-1,0
BOT
0,37.9531166666667
V
0,339.466571807861
V
-1,0
BOT
0,37.9597833333333
V
0,396.205902099609
V
-1,0
BOT
0,37.96645
V
0,460.05392074585
V
-1,0
BOT
0,37.9731166666667
V
0,531.453132629395
V
-1,0
BOT
0,37.9797833333333
V
0,610.779762268066
V
-1,0
BOT
0,37.98645
V
0,698.309421539307
V
-1,0
BOT
0,37.9931166666667
V
0,794.187068939209
V
-1,0
BOT
0,37.9997833333333
V
0,898.393154144287
V
-1,0
BOT
0,38.00645
V
0,1010.69831848145
V
-1,0
BOT
0,38.0131166666667
V
0,1130.60474395752
V
-1,0
BOT
0,38.0197833333333
V
0,1257.28178024292
V
-1,0
BOT
0,38.02645
V
0,1389.49584960938
V
-1,0
BOT
0,38.0331166666667
V
0,1525.56800842285
V
-1,0
BOT
0,38.0397833333333
V
0,1663.40255737305
V
-1,0
BOT
0,38.04645
V
0,1800.5747795105
V
-1,0
BOT
0,38.0531166666667
V
0,1934.44776535034
V
-1,0
BOT
0,38.0597833333333
V
0,2062.37411499023
V
-1,0
BOT
0,38.06645
V
0,2182.01065063477
V
-1,0
BOT
0,38.0731166666667
V
0,2291.61071777344
V
-1,0
BOT
0,38.0797833333333
V
0,2390.11192321777
V
-1,0
BOT
0,38.08645
V
0,2477.14567184448
V
-1,0
BOT
0,38.0931166666667
V
0,2552.9670715332
V
-1,0
BOT
0,38.0997833333333
V
0,2618.46733093262
V
-1,0
BOT
0,38.10645
V
0,2674.76463317871
V
-1,0
BOT
0,38.1131166666667
V
0,2723.0110168457
V
-1,0
BOT
0,38.1197833333333
V
0,2764.29891586304
V
-1,0
BOT
0,38.12645
V
0,2799.64876174927
V
-1,0
BOT
0,38.1331166666667
V
0,2829.94985580444
V
-1,0
BOT
0,38.1397833333333
V
0,2855.70240020752
V
-1,0
BOT
0,38.14645
V
0,2877.30646133423
V
-1,0
BOT
0,38.1531166666667
V
0,2895.08056640625
V
-1,0
BOT
0,38.1597833333333
V
0,2909.26933288574
V
-1,0
BOT
0,38.16645
V
0,2919.94619369507
V
-1,0
BOT
0,38.1731166666667
V
0,2927.08444595337
V
-1,0
BOT
0,38.1797833333333
V
0,2930.78708648682
V
-1,0
BOT
0,38.18645
V
0,2931.17475509644
V
-1,0
BOT
0,38.1931166666667
V
0,2928.3013343811
V
-1,0
BOT
0,38.1997833333333
V
0,2922.10721969605
V
-1,0
BOT
0,38.20645
V
0,2912.53805160522
V
-1,0
BOT
0,38.2131166666667
V
0,2899.57237243652
V
-1,0
BOT
0,38.2197833333333
V
0,2883.07571411133
V
-1,0
BOT
0,38.22645
V
0,2862.83826828003
V
-1,0
BOT
0,38.2331166666667
V
0,2838.63830566406
V
-1,0
BOT
0,38.2397833333333
V
0,2810.26124954224
V
-1,0
BOT
0,38.24645
V
0,2777.35614776611
V
-1,0
BOT
0,38.2531166666667
V
0,2739.3741607666
V
-1,0
BOT
0,38.2597833333333
V
0,2695.61862945557
V
-1,0
BOT
0,38.26645
V
0,2645.20025253296
V
-1,0
BOT
0,38.2731166666667
V
0,2587.13531494141
V
-1,0
BOT
0,38.2797833333333
V
0,2520.40386199951
V
-1,0
BOT
0,38.28645
V
0,2444.18239593506
V
-1,0
BOT
0,38.2931166666667
V
0,2357.98311233521
V
-1,0
BOT
0,38.2997833333333
V
0,2261.81888580322
V
-1,0
BOT
0,38.30645
V
0,2156.32629394531
V
-1,0
BOT
0,38.3131166666667
V
0,2042.69647598267
V
-1,0
BOT
0,38.3197833333333
V
0,1922.65605926514
V
-1,0
BOT
0,38.32645
V
0,1798.27260971069
V
-1,0
BOT
0,38.3331166666667
V
0,1671.77486419678
V
-1,0
BOT
0,38.3397833333333
V
0,1545.32051086426
V
-1,0
BOT
0,38.34645
V
0,1420.8459854126
V
-1,0
BOT
0,38.3531166666667
V
0,1299.98922348022
V
-1,0
BOT
0,38.3597833333333
V
0,1184.03387069702
V
-1,0
BOT
0,38.36645
V
0,1073.90928268433
V
-1,0
BOT
0,38.3731166666667
V
0,970.240592956543
V
-1,0
BOT
0,38.3797833333333
V
0,873.399257659912
V
-1,0
BOT
0,38.38645
V
0,783.559322357178
V
-1,0
BOT
0,38.3931166666667
V
0,700.728893280029
V
-1,0
BOT
0,38.3997833333333
V
0,624.781131744385
V
-1,0
BOT
0,38.40645
V
0,555.49430847168
V
-1,0
BOT
0,38.4131166666667
V
0,492.578983306885
V
-1,0
BOT
0,38.4197833333333
V
0,435.70613861084
V
-1,0
BOT
0,38.42645
V
0,384.513854980469
V
-1,0
BOT
0,38.4331166666667
V
0,338.61780166626
V
-1,0
BOT
0,38.4397833333333
V
0,297.620296478271
V
-1,0
BOT
0,38.44645
V
0,261.128902435303
V
-1,0
BOT
0,38.4531166666667
V
0,228.759288787842
V
-1,0
BOT
0,38.4597833333333
V
0,200.143814086914
V
-1,0
BOT
0,38.46645
V
0,174.927711486816
V
-1,0
BOT
0,38.4731166666667
V
0,152.772903442383
V
-1,0
BOT
0,38.4797833333333
V
0,133.359432220459
V
-1,0
BOT
0,38.48645
V
0,116.393089294434
V
-1,0
BOT
0,38.4931166666667
V
0,101.603507995605
V
-1,0
BOT
0,38.4997833333333
V
0,88.7441635131836
V
-1,0
BOT
0,38.50645
V
0,77.5861740112305
V
-1,0
BOT
0,38.5131166666667
V
0,67.9230690002441
V
-1,0
BOT
0,38.5197833333333
V
0,59.567928314209
V
-1,0
BOT
0,38.52645
V
0,52.3548126220703
V
-1,0
BOT
0,38.5331166666667
V
0,46.1359024047852
V
-1,0
BOT
0,38.5397833333333
V
0,40.7800674438477
V
-1,0
BOT
0,38.54645
V
0,36.1700057983398
V
-1,0
BOT
0,38.5531166666667
V
0,32.2027206420898
V
-1,0
BOT
0,38.5597833333333
V
0,28.7876129150391
V
-1,0
BOT
0,38.56645
V
0,25.8474349975586
V
-1,0
BOT
0,38.5731166666667
V
0,23.3139991760254
V
-1,0
BOT
0,38.5797833333333
V
0,21.1291313171387
V
-1,0
BOT
0,38.58645
V
0,19.2408561706543
V
-1,0
BOT
0,38.5931166666667
V
0,17.6053047180176
V
-1,0
BOT
0,38.5997833333333
V
0,16.1852836608887
V
-1,0
BOT
0,38.60645
V
0,14.9478912353516
V
-1,0
BOT
0,38.6131166666667
V
0,13.8659477233887
V
-1,0
BOT
0,38.6197833333333
V
0,12.9156112670898
V
-1,0
BOT
0,38.62645
V
0,12.0782852172852
V
-1,0
BOT
0,38.6331166666667
V
0,11.3363265991211
V
-1,0
BOT
0,38.6397833333333
V
0,10.6759071350098
V
-1,0
BOT
0,38.64645
V
0,10.0836753845215
V
-1,0
BOT
0,38.6531166666667
V
0,9.55009460449219
V
-1,0
BOT
0,38.6597833333333
V
0,9.06801223754883
V
-1,0
BOT
0,38.66645
V
0,8.62884521484375
V
-1,0
BOT
0,38.6731166666667
V
0,8.22639465332031
V
-1,0
BOT
0,38.6797833333333
V
0,7.85732269287109
V
-1,0
BOT
0,38.68645
V
0,7.51781463623047
V
-1,0
BOT
0,38.6931166666667
V
0,7.20405578613281
V
-1,0
BOT
0,38.6997833333333
V
0,6.9127082824707
V
-1,0
BOT
0,38.70645
V
0,6.64091110229492
V
-1,0
BOT
0,38.7131166666667
V
0,6.38580322265625
V
-1,0
BOT
0,38.7197833333333
V
0,6.14595413208008
V
-1,0
BOT
0,38.72645
V
0,5.9199333190918
V
-1,0
BOT
0,38.7331166666667
V
0,5.7072639465332
V
-1,0
BOT
0,38.7397833333333
V
0,5.50556182861328
V
-1,0
BOT
0,38.74645
V
0,5.31482696533203
V
-1,0
BOT
0,38.7531166666667
V
0,5.13315200805664
V
-1,0
BOT
0,38.7597833333333
V
0,4.96053695678711
V
-1,0
BOT
0,38.76645
V
0,4.79602813720703
V
-1,0
BOT
0,38.7731166666667
V
0,4.6381950378418
V
-1,0
BOT
0,38.7797833333333
V
0,4.48751449584961
V
-1,0
BOT
0,38.78645
V
0,4.34303283691406
V
-1,0
BOT
0,38.7931166666667
V
0,4.20522689819336
V
-1,0
BOT
0,38.7997833333333
V
0,4.07266616821289
V
-1,0
BOT
0,38.80645
V
0,3.94630432128906
V
-1,0
BOT
0,38.8131166666667
V
0,3.82471084594727
V
-1,0
BOT
0,38.8197833333333
V
0,3.7083625793457
V
-1,0
BOT
0,38.82645
V
0,3.59582901000977
V
-1,0
BOT
0,38.8331166666667
V
0,3.48806381225586
V
-1,0
BOT
0,38.8397833333333
V
0,3.38411331176758
V
-1,0
BOT
0,38.84645
V
0,3.28445434570312
V
-1,0
BOT
0,38.8531166666667
V
0,3.18813323974609
V
-1,0
BOT
0,38.8597833333333
V
0,3.09467315673828
V
-1,0
BOT
0,38.86645
V
0,3.00455093383789
V
-1,0
BOT
0,38.8731166666667
V
0,2.91728973388672
V
-1,0
BOT
0,38.8797833333333
V
0,2.83288955688477
V
-1,0
BOT
0,38.88645
V
0,2.75087356567383
V
-1,0
BOT
0,38.8931166666667
V
0,2.67124176025391
V
-1,0
BOT
0,38.8997833333333
V
0,2.5935173034668
V
-1,0
BOT
0,38.90645
V
0,2.51865386962891
V
-1,0
BOT
0,38.9131166666667
V
0,2.44522094726562
V
-1,0
BOT
0,38.9197833333333
V
0,2.37369537353516
V
-1,0
BOT
0,38.92645
V
0,2.30503082275391
V
-1,0
BOT
0,38.9331166666667
V
0,2.23875045776367
V
-1,0
BOT
0,38.9397833333333
V
0,2.17485427856445
V
-1,0
BOT
0,38.94645
V
0,2.11286544799805
V
-1,0
BOT
0,38.9531166666667
V
0,2.05326080322266
V
-1,0
BOT
0,38.9597833333333
V
0,1.99556350708008
V
-1,0
BOT
0,38.96645
V
0,1.93977355957031
V
-1,0
BOT
0,38.9731166666667
V
0,1.88493728637695
V
-1,0
BOT
0,38.9797833333333
V
0,1.83200836181641
V
-1,0
BOT
0,38.98645
V
0,1.78003311157227
V
-1,0
BOT
0,38.9931166666667
V
0,1.72996520996094
V
-1,0
BOT
0,38.9997833333333
V
0,1.68180465698242
V
-1,0
BOT
0,39.00645
V
0,1.63507461547852
V
-1,0
BOT
0,39.0131166666667
V
0,1.58977508544922
V
-1,0
BOT
0,39.0197833333333
V
0,1.54685974121094
V
-1,0
BOT
0,39.02645
V
0,1.50489807128906
V
-1,0
BOT
0,39.0331166666667
V
0,1.46389007568359
V
-1,0
BOT
0,39.0397833333333
V
0,1.42431259155273
V
-1,0
BOT
0,39.04645
V
0,1.38473510742187
V
-1,0
BOT
0,39.0531166666667
V
0,1.34658813476562
V
-1,0
BOT
0,39.0597833333333
V
0,1.30939483642578
V
-1,0
BOT
0,39.06645
V
0,1.27315521240234
V
-1,0
BOT
0,39.0731166666667
V
0,1.23834609985352
V
-1,0
BOT
0,39.0797833333333
V
0,1.20401382446289
V
-1,0
BOT
0,39.08645
V
0,1.17063522338867
V
-1,0
BOT
0,39.0931166666667
V
0,1.13773345947266
V
-1,0
BOT
0,39.0997833333333
V
0,1.10530853271484
V
-1,0
BOT
0,39.10645
V
0,1.07288360595703
V
-1,0
BOT
0,39.1131166666667
V
0,1.04045867919922
V
-1,0
BOT
0,39.1197833333333
V
0,1.00851058959961
V
-1,0
BOT
0,39.12645
V
0,0.977039337158203
V
-1,0
BOT
0,39.1331166666667
V
0,0.946521759033203
V
-1,0
BOT
0,39.1397833333333
V
0,0.916004180908203
V
-1,0
BOT
0,39.14645
V
0,0.885963439941406
V
-1,0
BOT
0,39.1531166666667
V
0,0.856399536132813
V
-1,0
BOT
0,39.1597833333333
V
0,0.826835632324219
V
-1,0
BOT
0,39.16645
V
0,0.797271728515625
V
-1,0
BOT
0,39.1731166666667
V
0,0.767707824707031
V
-1,0
BOT
0,39.1797833333333
V
0,0.739097595214844
V
-1,0
BOT
0,39.18645
V
0,0.711441040039063
V
-1,0
BOT
0,39.1931166666667
V
0,0.683784484863281
V
-1,0
BOT
0,39.1997833333333
V
0,0.657081604003906
V
-1,0
BOT
0,39.20645
V
0,0.630378723144531
V
-1,0
BOT
0,39.2131166666667
V
0,0.604152679443359
V
-1,0
BOT
0,39.2197833333333
V
0,0.577449798583984
V
-1,0
BOT
0,39.22645
V
0,0.551223754882813
V
-1,0
BOT
0,39.2331166666667
V
0,0.524997711181641
V
-1,0
BOT
0,39.2397833333333
V
0,0.500202178955078
V
-1,0
BOT
0,39.24645
V
0,0.476837158203125
V
-1,0
BOT
0,39.2531166666667
V
0,0.453472137451172
V
-1,0
BOT
0,39.2597833333333
V
0,0.431060791015625
V
-1,0
BOT
0,39.26645
V
0,0.408649444580078
V
-1,0
BOT
0,39.2731166666667
V
0,0.387191772460937
V
-1,0
BOT
0,39.2797833333333
V
0,0.365734100341797
V
-1,0
BOT
0,39.28645
V
0,0.344276428222656
V
-1,0
BOT
0,39.2931166666667
V
0,0.323772430419922
V
-1,0
BOT
0,39.2997833333333
V
0,0.303745269775391
V
-1,0
BOT
0,39.30645
V
0,0.284194946289062
V
-1,0
BOT
0,39.3131166666667
V
0,0.265121459960937
V
-1,0
BOT
0,39.3197833333333
V
0,0.247001647949219
V
-1,0
BOT
0,39.32645
V
0,0.2288818359375
V
-1,0
BOT
0,39.3331166666667
V
0,0.211238861083984
V
-1,0
BOT
0,39.3397833333333
V
0,0.194549560546875
V
-1,0
BOT
0,39.34645
V
0,0.177860260009766
V
-1,0
BOT
0,39.3531166666667
V
0,0.162124633789062
V
-1,0
BOT
0,39.3597833333333
V
0,0.147342681884766
V
-1,0
BOT
0,39.36645
V
0,0.132560729980469
V
-1,0
BOT
0,39.3731166666667
V
0,0.118732452392578
V
-1,0
BOT
0,39.3797833333333
V
0,0.105857849121094
V
-1,0
BOT
0,39.38645
V
0,0.0925064086914063
V
-1,0
BOT
0,39.3931166666667
V
0,0.0796318054199219
V
-1,0
BOT
0,39.3997833333333
V
0,0.0672340393066406
V
-1,0
BOT
0,39.40645
V
0,0.0548362731933594
V
-1,0
BOT
0,39.4131166666667
V
0,0.0429153442382813
V
-1,0
BOT
0,39.4197833333333
V
0,0.0309944152832031
V
-1,0
BOT
0,39.42645
V
0,0.0195503234863281
V
-1,0
BOT
0,39.4331166666667
V
0,0.00858306884765625
V
-1,0
BOT
0,39.4397833333333
V
0,-0.0019073486328125
V
-1,0
BOT
0,39.44645
V
0,-0.0123977661132812
V
-1,0
BOT
0,39.4531166666667
V
0,-0.0224113464355469
V
-1,0
BOT
0,39.4597833333333
V
0,-0.0319480895996094
V
-1,0
BOT
0,39.46645
V
0,-0.0410079956054688
V
-1,0
BOT
0,39.4731166666667
V
0,-0.0500679016113281
V
-1,0
BOT
0,39.4797833333333
V
0,-0.0591278076171875
V
-1,0
BOT
0,39.48645
V
0,-0.0677108764648438
V
-1,0
BOT
0,39.4931166666667
V
0,-0.0767707824707031
V
-1,0
BOT
0,39.4997833333333
V
0,-0.0858306884765625
V
-1,0
BOT
0,39.50645
V
0,-0.095367431640625
V
-1,0
BOT
0,39.5131166666667
V
0,-0.104904174804687
V
-1,0
BOT
0,39.5197833333333
V
0,-0.11444091796875
V
-1,0
BOT
0,39.52645
V
0,-0.123977661132812
V
-1,0
BOT
0,39.5331166666667
V
0,-0.133037567138672
V
-1,0
BOT
0,39.5397833333333
V
0,-0.142097473144531
V
-1,0
BOT
0,39.54645
V
0,-0.150203704833984
V
-1,0
BOT
0,39.5531166666667
V
0,-0.159263610839844
V
-1,0
BOT
0,39.5597833333333
V
0,-0.168323516845703
V
-1,0
BOT
0,39.56645
V
0,-0.177383422851562
V
-1,0
BOT
0,39.5731166666667
V
0,-0.186920166015625
V
-1,0
BOT
0,39.5797833333333
V
0,-0.195980072021484
V
-1,0
BOT
0,39.58645
V
0,-0.205516815185547
V
-1,0
BOT
0,39.5931166666667
V
0,-0.215530395507812
V
-1,0
BOT
0,39.5997833333333
V
0,-0.226020812988281
V
-1,0
BOT
0,39.60645
V
0,-0.23651123046875
V
-1,0
BOT
0,39.6131166666667
V
0,-0.247478485107422
V
-1,0
BOT
0,39.6197833333333
V
0,-0.2593994140625
V
-1,0
BOT
0,39.62645
V
0,-0.270366668701172
V
-1,0
BOT
0,39.6331166666667
V
0,-0.280857086181641
V
-1,0
BOT
0,39.6397833333333
V
0,-0.291824340820312
V
-1,0
BOT
0,39.64645
V
0,-0.302314758300781
V
-1,0
BOT
0,39.6531166666667
V
0,-0.312328338623047
V
-1,0
BOT
0,39.6597833333333
V
0,-0.321865081787109
V
-1,0
BOT
0,39.66645
V
0,-0.331401824951172
V
-1,0
BOT
0,39.6731166666667
V
0,-0.340938568115234
V
-1,0
BOT
0,39.6797833333333
V
0,-0.349521636962891
V
-1,0
BOT
0,39.68645
V
0,-0.357627868652344
V
-1,0
BOT
0,39.6931166666667
V
0,-0.365257263183594
V
-1,0
BOT
0,39.6997833333333
V
0,-0.372409820556641
V
-1,0
BOT
0,39.70645
V
0,-0.380039215087891
V
-1,0
BOT
0,39.7131166666667
V
0,-0.386714935302734
V
-1,0
BOT
0,39.7197833333333
V
0,-0.393867492675781
V
-1,0
BOT
0,39.72645
V
0,-0.400543212890625
V
-1,0
BOT
0,39.7331166666667
V
0,-0.407218933105469
V
-1,0
BOT
0,39.7397833333333
V
0,-0.412940979003906
V
-1,0
BOT
0,39.74645
V
0,-0.418186187744141
V
-1,0
BOT
0,39.7531166666667
V
0,-0.423431396484375
V
-1,0
BOT
0,39.7597833333333
V
0,-0.427722930908203
V
-1,0
BOT
0,39.76645
V
0,-0.431537628173828
V
-1,0
BOT
0,39.7731166666667
V
0,-0.435352325439453
V
-1,0
BOT
0,39.7797833333333
V
0,-0.438690185546875
V
-1,0
BOT
0,39.78645
V
0,-0.442028045654297
V
-1,0
BOT
0,39.7931166666667
V
0,-0.445365905761719
V
-1,0
BOT
0,39.7997833333333
V
0,-0.448703765869141
V
-1,0
BOT
0,39.80645
V
0,-0.452041625976563
V
-1,0
BOT
0,39.8131166666667
V
0,-0.455379486083984
V
-1,0
BOT
0,39.8197833333333
V
0,-0.459194183349609
V
-1,0
BOT
0,39.82645
V
0,-0.462532043457031
V
-1,0
BOT
0,39.8331166666667
V
0,-0.46539306640625
V
-1,0
BOT
0,39.8397833333333
V
0,-0.468730926513672
V
-1,0
BOT
0,39.84645
V
0,-0.472068786621094
V
-1,0
BOT
0,39.8531166666667
V
0,-0.475406646728516
V
-1,0
BOT
0,39.8597833333333
V
0,-0.478744506835938
V
-1,0
BOT
0,39.86645
V
0,-0.482559204101563
V
-1,0
BOT
0,39.8731166666667
V
0,-0.486850738525391
V
-1,0
BOT
0,39.8797833333333
V
0,-0.491619110107422
V
-1,0
BOT
0,39.88645
V
0,-0.496864318847656
V
-1,0
BOT
0,39.8931166666667
V
0,-0.502586364746094
V
-1,0
BOT
0,39.8997833333333
V
0,-0.508308410644531
V
-1,0
BOT
0,39.90645
V
0,-0.514030456542969
V
-1,0
BOT
0,39.9131166666667
V
0,-0.519752502441406
V
-1,0
BOT
0,39.9197833333333
V
0,-0.525951385498047
V
-1,0
BOT
0,39.92645
V
0,-0.532150268554688
V
-1,0
BOT
0,39.9331166666667
V
0,-0.538825988769531
V
-1,0
BOT
0,39.9397833333333
V
0,-0.546455383300781
V
-1,0
BOT
0,39.94645
V
0,-0.555038452148438
V
-1,0
BOT
0,39.9531166666667
V
0,-0.564098358154297
V
-1,0
BOT
0,39.9597833333333
V
0,-0.573158264160156
V
-1,0
BOT
0,39.96645
V
0,-0.582218170166016
V
-1,0
BOT
0,39.9731166666667
V
0,-0.591278076171875
V
-1,0
BOT
0,39.9797833333333
V
0,-0.599861145019531
V
-1,0
BOT
0,39.98645
V
0,-0.609397888183594
V
-1,0
BOT
0,39.9931166666667
V
0,-0.618457794189453
V
-1,0
BOT
0,39.9997833333333
V
0,-0.627994537353516
V
-1,0
BOT
0,40.00645
V
0,-0.637054443359375
V
-1,0
BOT
0,40.0131166666667
V
0,-0.646114349365234
V
-1,0
BOT
0,40.0197833333333
V
0,-0.654697418212891
V
-1,0
BOT
0,40.02645
V
0,-0.662326812744141
V
-1,0
BOT
0,40.0331166666667
V
0,-0.669479370117188
V
-1,0
BOT
0,40.0397833333333
V
0,-0.676155090332031
V
-1,0
BOT
0,40.04645
V
0,-0.682830810546875
V
-1,0
BOT
0,40.0531166666667
V
0,-0.689506530761719
V
-1,0
BOT
0,40.0597833333333
V
0,-0.695228576660156
V
-1,0
BOT
0,40.06645
V
0,-0.701427459716797
V
-1,0
BOT
0,40.0731166666667
V
0,-0.707626342773438
V
-1,0
BOT
0,40.0797833333333
V
0,-0.713348388671875
V
-1,0
BOT
0,40.08645
V
0,-0.718593597412109
V
-1,0
BOT
0,40.0931166666667
V
0,-0.723838806152344
V
-1,0
BOT
0,40.0997833333333
V
0,-0.728607177734375
V
-1,0
BOT
0,40.10645
V
0,-0.733375549316406
V
-1,0
BOT
0,40.1131166666667
V
0,-0.737667083740234
V
-1,0
BOT
0,40.1197833333333
V
0,-0.741958618164063
V
-1,0
BOT
0,40.12645
V
0,-0.745773315429688
V
-1,0
BOT
0,40.1331166666667
V
0,-0.750064849853516
V
-1,0
BOT
0,40.1397833333333
V
0,-0.754356384277344
V
-1,0
BOT
0,40.14645
V
0,-0.758647918701172
V
-1,0
BOT
0,40.1531166666667
V
0,-0.762939453125
V
-1,0
BOT
0,40.1597833333333
V
0,-0.766277313232422
V
-1,0
BOT
0,40.16645
V
0,-0.769138336181641
V
-1,0
BOT
0,40.1731166666667
V
0,-0.771999359130859
V
-1,0
BOT
0,40.1797833333333
V
0,-0.774860382080078
V
-1,0
BOT
0,40.18645
V
0,-0.777244567871094
V
-1,0
BOT
0,40.1931166666667
V
0,-0.780105590820313
V
-1,0
BOT
0,40.1997833333333
V
0,-0.783920288085938
V
-1,0
BOT
0,40.20645
V
0,-0.787734985351563
V
-1,0
BOT
0,40.2131166666667
V
0,-0.792026519775391
V
-1,0
BOT
0,40.2197833333333
V
0,-0.796318054199219
V
-1,0
BOT
0,40.22645
V
0,-0.799655914306641
V
-1,0
BOT
0,40.2331166666667
V
0,-0.802993774414063
V
-1,0
BOT
0,40.2397833333333
V
0,-0.805377960205078
V
-1,0
BOT
0,40.24645
V
0,-0.808238983154297
V
-1,0
BOT
0,40.2531166666667
V
0,-0.812053680419922
V
-1,0
BOT
0,40.2597833333333
V
0,-0.815868377685547
V
-1,0
BOT
0,40.26645
V
0,-0.819683074951172
V
-1,0
BOT
0,40.2731166666667
V
0,-0.823974609375
V
-1,0
BOT
0,40.2797833333333
V
0,-0.828266143798828
V
-1,0
BOT
0,40.28645
V
0,-0.832080841064453
V
-1,0
BOT
0,40.2931166666667
V
0,-0.834941864013672
V
-1,0
BOT
0,40.2997833333333
V
0,-0.837802886962891
V
-1,0
BOT
0,40.30645
V
0,-0.840187072753906
V
-1,0
BOT
0,40.3131166666667
V
0,-0.843048095703125
V
-1,0
BOT
0,40.3197833333333
V
0,-0.84686279296875
V
-1,0
BOT
0,40.32645
V
0,-0.850200653076172
V
-1,0
BOT
0,40.3331166666667
V
0,-0.854015350341797
V
-1,0
BOT
0,40.3397833333333
V
0,-0.857353210449219
V
-1,0
BOT
0,40.34645
V
0,-0.860691070556641
V
-1,0
BOT
0,40.3531166666667
V
0,-0.864028930664063
V
-1,0
BOT
0,40.3597833333333
V
0,-0.866889953613281
V
-1,0
BOT
0,40.36645
V
0,-0.870704650878906
V
-1,0
BOT
0,40.3731166666667
V
0,-0.874042510986328
V
-1,0
BOT
0,40.3797833333333
V
0,-0.87738037109375
V
-1,0
BOT
0,40.38645
V
0,-0.880718231201172
V
-1,0
BOT
0,40.3931166666667
V
0,-0.884056091308594
V
-1,0
BOT
0,40.3997833333333
V
0,-0.886917114257813
V
-1,0
BOT
0,40.40645
V
0,-0.889778137207031
V
-1,0
BOT
0,40.4131166666667
V
0,-0.89263916015625
V
-1,0
BOT
0,40.4197833333333
V
0,-0.895023345947266
V
-1,0
BOT
0,40.42645
V
0,-0.897884368896484
V
-1,0
BOT
0,40.4331166666667
V
0,-0.899791717529297
V
-1,0
BOT
0,40.4397833333333
V
0,-0.902175903320313
V
-1,0
BOT
0,40.44645
V
0,-0.905036926269531
V
-1,0
BOT
0,40.4531166666667
V
0,-0.907421112060547
V
-1,0
BOT
0,40.4597833333333
V
0,-0.910282135009766
V
-1,0
BOT
0,40.46645
V
0,-0.912666320800781
V
-1,0
BOT
0,40.4731166666667
V
0,-0.91552734375
V
-1,0
BOT
0,40.4797833333333
V
0,-0.917911529541016
V
-1,0
BOT
0,40.48645
V
0,-0.920295715332031
V
-1,0
BOT
0,40.4931166666667
V
0,-0.92315673828125
V
-1,0
BOT
0,40.4997833333333
V
0,-0.925540924072266
V
-1,0
BOT
0,40.50645
V
0,-0.927925109863281
V
-1,0
BOT
0,40.5131166666667
V
0,-0.9307861328125
V
-1,0
BOT
0,40.5197833333333
V
0,-0.933170318603516
V
-1,0
BOT
0,40.52645
V
0,-0.935554504394531
V
-1,0
BOT
0,40.5331166666667
V
0,-0.936985015869141
V
-1,0
BOT
0,40.5397833333333
V
0,-0.93841552734375
V
-1,0
BOT
0,40.54645
V
0,-0.940322875976563
V
-1,0
BOT
0,40.5531166666667
V
0,-0.941753387451172
V
-1,0
BOT
0,40.5597833333333
V
0,-0.942707061767578
V
-1,0
BOT
0,40.56645
V
0,-0.943183898925781
V
-1,0
BOT
0,40.5731166666667
V
0,-0.944137573242188
V
-1,0
BOT
0,40.5797833333333
V
0,-0.945568084716797
V
-1,0
BOT
0,40.58645
V
0,-0.946998596191406
V
-1,0
BOT
0,40.5931166666667
V
0,-0.947952270507813
V
-1,0
BOT
0,40.5997833333333
V
0,-0.948429107666016
V
-1,0
BOT
0,40.60645
V
0,-0.948429107666016
V
-1,0
BOT
0,40.6131166666667
V
0,-0.948429107666016
V
-1,0
BOT
0,40.6197833333333
V
0,-0.946998596191406
V
-1,0
BOT
0,40.62645
V
0,-0.945091247558594
V
-1,0
BOT
0,40.6331166666667
V
0,-0.941753387451172
V
-1,0
BOT
0,40.6397833333333
V
0,-0.93841552734375
V
-1,0
BOT
0,40.64645
V
0,-0.934123992919922
V
-1,0
BOT
0,40.6531166666667
V
0,-0.930309295654297
V
-1,0
BOT
0,40.6597833333333
V
0,-0.926017761230469
V
-1,0
BOT
0,40.66645
V
0,-0.921726226806641
V
-1,0
BOT
0,40.6731166666667
V
0,-0.917911529541016
V
-1,0
BOT
0,40.6797833333333
V
0,-0.914096832275391
V
-1,0
BOT
0,40.68645
V
0,-0.909805297851563
V
-1,0
BOT
0,40.6931166666667
V
0,-0.905513763427734
V
-1,0
BOT
0,40.6997833333333
V
0,-0.901222229003906
V
-1,0
BOT
0,40.70645
V
0,-0.896930694580078
V
-1,0
BOT
0,40.7131166666667
V
0,-0.893115997314453
V
-1,0
BOT
0,40.7197833333333
V
0,-0.889301300048828
V
-1,0
BOT
0,40.72645
V
0,-0.885486602783203
V
-1,0
BOT
0,40.7331166666667
V
0,-0.881671905517578
V
-1,0
BOT
0,40.7397833333333
V
0,-0.877857208251953
V
-1,0
BOT
0,40.74645
V
0,-0.874042510986328
V
-1,0
BOT
0,40.7531166666667
V
0,-0.870227813720703
V
-1,0
BOT
0,40.7597833333333
V
0,-0.866889953613281
V
-1,0
BOT
0,40.76645
V
0,-0.864028930664063
V
-1,0
BOT
0,40.7731166666667
V
0,-0.862598419189453
V
-1,0
BOT
0,40.7797833333333
V
0,-0.861644744873047
V
-1,0
BOT
0,40.78645
V
0,-0.861644744873047
V
-1,0
BOT
0,40.7931166666667
V
0,-0.862598419189453
V
-1,0
BOT
0,40.7997833333333
V
0,-0.864505767822266
V
-1,0
BOT
0,40.80645
V
0,-0.866413116455078
V
-1,0
BOT
0,40.8131166666667
V
0,-0.8697509765625
V
-1,0
BOT
0,40.8197833333333
V
0,-0.873088836669922
V
-1,0
BOT
0,40.82645
V
0,-0.87738037109375
V
-1,0
BOT
0,40.8331166666667
V
0,-0.882148742675781
V
-1,0
BOT
0,40.8397833333333
V
0,-0.887870788574219
V
-1,0
BOT
0,40.84645
V
0,-0.894069671630859
V
-1,0
BOT
0,40.8531166666667
V
0,-0.9002685546875
V
-1,0
BOT
0,40.8597833333333
V
0,-0.906944274902344
V
-1,0
BOT
0,40.86645
V
0,-0.914096832275391
V
-1,0
BOT
0,40.8731166666667
V
0,-0.920772552490234
V
-1,0
BOT
0,40.8797833333333
V
0,-0.927925109863281
V
-1,0
BOT
0,40.88645
V
0,-0.934600830078125
V
-1,0
BOT
0,40.8931166666667
V
0,-0.941276550292969
V
-1,0
BOT
0,40.8997833333333
V
0,-0.948429107666016
V
-1,0
BOT
0,40.90645
V
0,-0.955581665039063
V
-1,0
BOT
0,40.9131166666667
V
0,-0.962734222412109
V
-1,0
BOT
0,40.9197833333333
V
0,-0.969409942626953
V
-1,0
BOT
0,40.92645
V
0,-0.975608825683594
V
-1,0
BOT
0,40.9331166666667
V
0,-0.980854034423828
V
-1,0
BOT
0,40.9397833333333
V
0,-0.985622406005859
V
-1,0
BOT
0,40.94645
V
0,-0.988960266113281
V
-1,0
BOT
0,40.9531166666667
V
0,-0.992298126220703
V
-1,0
BOT
0,40.9597833333333
V
0,-0.995159149169922
V
-1,0
BOT
0,40.96645
V
0,-0.998020172119141
V
-1,0
BOT
0,40.9731166666667
V
0,-0.999927520751953
V
-1,0
BOT
0,40.9797833333333
V
0,-1.00183486938477
V
-1,0
BOT
0,40.98645
V
0,-1.00326538085937
V
-1,0
BOT
0,40.9931166666667
V
0,-1.00469589233398
V
-1,0
BOT
0,40.9997833333333
V
0,-1.00517272949219
V
-1,0
BOT
0,41.00645
V
0,-1.00612640380859
V
-1,0
BOT
0,41.0131166666667
V
0,-1.007080078125
V
-1,0
BOT
0,41.0197833333333
V
0,-1.00803375244141
V
-1,0
BOT
0,41.02645
V
0,-1.00898742675781
V
-1,0
BOT
0,41.0331166666667
V
0,-1.00994110107422
V
-1,0
BOT
0,41.0397833333333
V
0,-1.01089477539062
V
-1,0
BOT
0,41.04645
V
0,-1.01137161254883
V
-1,0
BOT
0,41.0531166666667
V
0,-1.01232528686523
V
-1,0
BOT
0,41.0597833333333
V
0,-1.01327896118164
V
-1,0
BOT
0,41.06645
V
0,-1.01423263549805
V
-1,0
BOT
0,41.0731166666667
V
0,-1.01613998413086
V
-1,0
BOT
0,41.0797833333333
V
0,-1.01804733276367
V
-1,0
BOT
0,41.08645
V
0,-1.02090835571289
V
-1,0
BOT
0,41.0931166666667
V
0,-1.02329254150391
V
-1,0
BOT
0,41.0997833333333
V
0,-1.02615356445312
V
-1,0
BOT
0,41.10645
V
0,-1.02901458740234
V
-1,0
BOT
0,41.1131166666667
V
0,-1.03187561035156
V
-1,0
BOT
0,41.1197833333333
V
0,-1.03569030761719
V
-1,0
BOT
0,41.12645
V
0,-1.03998184204102
V
-1,0
BOT
0,41.1331166666667
V
0,-1.04475021362305
V
-1,0
BOT
0,41.1397833333333
V
0,-1.04951858520508
V
-1,0
BOT
0,41.14645
V
0,-1.05428695678711
V
-1,0
BOT
0,41.1531166666667
V
0,-1.05857849121094
V
-1,0
BOT
0,41.1597833333333
V
0,-1.06239318847656
V
-1,0
BOT
0,41.16645
V
0,-1.06573104858398
V
-1,0
BOT
0,41.1731166666667
V
0,-1.0685920715332
V
-1,0
BOT
0,41.1797833333333
V
0,-1.07192993164062
V
-1,0
BOT
0,41.18645
V
0,-1.07526779174805
V
-1,0
BOT
0,41.1931166666667
V
0,-1.07812881469727
V
-1,0
BOT
0,41.1997833333333
V
0,-1.08146667480469
V
-1,0
BOT
0,41.20645
V
0,-1.08480453491211
V
-1,0
BOT
0,41.2131166666667
V
0,-1.08766555786133
V
-1,0
BOT
0,41.2197833333333
V
0,-1.09004974365234
V
-1,0
BOT
0,41.22645
V
0,-1.09195709228516
V
-1,0
BOT
0,41.2331166666667
V
0,-1.09386444091797
V
-1,0
BOT
0,41.2397833333333
V
0,-1.09624862670898
V
-1,0
BOT
0,41.24645
V
0,-1.0981559753418
V
-1,0
BOT
0,41.2531166666667
V
0,-1.10054016113281
V
-1,0
BOT
0,41.2597833333333
V
0,-1.10292434692383
V
-1,0
BOT
0,41.26645
V
0,-1.10578536987305
V
-1,0
BOT
0,41.2731166666667
V
0,-1.10816955566406
V
-1,0
BOT
0,41.2797833333333
V
0,-1.11055374145508
V
-1,0
BOT
0,41.28645
V
0,-1.11246109008789
V
-1,0
BOT
0,41.2931166666667
V
0,-1.1143684387207
V
-1,0
BOT
0,41.2997833333333
V
0,-1.11627578735352
V
-1,0
BOT
0,41.30645
V
0,-1.11818313598633
V
-1,0
BOT
0,41.3131166666667
V
0,-1.12056732177734
V
-1,0
BOT
0,41.3197833333333
V
0,-1.12247467041016
V
-1,0
BOT
0,41.32645
V
0,-1.12485885620117
V
-1,0
BOT
0,41.3331166666667
V
0,-1.12724304199219
V
-1,0
BOT
0,41.3397833333333
V
0,-1.1296272277832
V
-1,0
BOT
0,41.34645
V
0,-1.13153457641602
V
-1,0
BOT
0,41.3531166666667
V
0,-1.13296508789062
V
-1,0
BOT
0,41.3597833333333
V
0,-1.13391876220703
V
-1,0
BOT
0,41.36645
V
0,-1.13487243652344
V
-1,0
BOT
0,41.3731166666667
V
0,-1.13534927368164
V
-1,0
BOT
0,41.3797833333333
V
0,-1.13630294799805
V
-1,0
BOT
0,41.38645
V
0,-1.13677978515625
V
-1,0
BOT
0,41.3931166666667
V
0,-1.13725662231445
V
-1,0
BOT
0,41.3997833333333
V
0,-1.13773345947266
V
-1,0
BOT
0,41.40645
V
0,-1.13868713378906
V
-1,0
BOT
0,41.4131166666667
V
0,-1.14011764526367
V
-1,0
BOT
0,41.4197833333333
V
0,-1.14107131958008
V
-1,0
BOT
0,41.42645
V
0,-1.14202499389648
V
-1,0
BOT
0,41.4331166666667
V
0,-1.14297866821289
V
-1,0
BOT
0,41.4397833333333
V
0,-1.1439323425293
V
-1,0
BOT
0,41.44645
V
0,-1.1448860168457
V
-1,0
BOT
0,41.4531166666667
V
0,-1.14536285400391
V
-1,0
BOT
0,41.4597833333333
V
0,-1.14583969116211
V
-1,0
BOT
0,41.46645
V
0,-1.14679336547852
V
-1,0
BOT
0,41.4731166666667
V
0,-1.14822387695312
V
-1,0
BOT
0,41.4797833333333
V
0,-1.14917755126953
V
-1,0
BOT
0,41.48645
V
0,-1.15013122558594
V
-1,0
BOT
0,41.4931166666667
V
0,-1.15060806274414
V
-1,0
BOT
0,41.4997833333333
V
0,-1.15108489990234
V
-1,0
BOT
0,41.50645
V
0,-1.15156173706055
V
-1,0
BOT
0,41.5131166666667
V
0,-1.15251541137695
V
-1,0
BOT
0,41.5197833333333
V
0,-1.15346908569336
V
-1,0
BOT
0,41.52645
V
0,-1.15489959716797
V
-1,0
BOT
0,41.5331166666667
V
0,-1.15585327148437
V
-1,0
BOT
0,41.5397833333333
V
0,-1.15680694580078
V
-1,0
BOT
0,41.54645
V
0,-1.15776062011719
V
-1,0
BOT
0,41.5531166666667
V
0,-1.15823745727539
V
-1,0
BOT
0,41.5597833333333
V
0,-1.15871429443359
V
-1,0
BOT
0,41.56645
V
0,-1.1591911315918
V
-1,0
BOT
0,41.5731166666667
V
0,-1.15966796875
V
-1,0
BOT
0,41.5797833333333
V
0,-1.16109848022461
V
-1,0
BOT
0,41.58645
V
0,-1.16252899169922
V
-1,0
BOT
0,41.5931166666667
V
0,-1.16348266601562
V
-1,0
BOT
0,41.5997833333333
V
0,-1.16443634033203
V
-1,0
BOT
0,41.60645
V
0,-1.16443634033203
V
-1,0
BOT
0,41.6131166666667
V
0,-1.16443634033203
V
-1,0
BOT
0,41.6197833333333
V
0,-1.16491317749023
V
-1,0
BOT
0,41.62645
V
0,-1.16491317749023
V
-1,0
BOT
0,41.6331166666667
V
0,-1.16539001464844
V
-1,0
BOT
0,41.6397833333333
V
0,-1.16634368896484
V
-1,0
BOT
0,41.64645
V
0,-1.16777420043945
V
-1,0
BOT
0,41.6531166666667
V
0,-1.16872787475586
V
-1,0
BOT
0,41.6597833333333
V
0,-1.16968154907227
V
-1,0
BOT
0,41.66645
V
0,-1.16968154907227
V
-1,0
BOT
0,41.6731166666667
V
0,-1.16968154907227
V
-1,0
BOT
0,41.6797833333333
V
0,-1.16968154907227
V
-1,0
BOT
0,41.68645
V
0,-1.17015838623047
V
-1,0
BOT
0,41.6931166666667
V
0,-1.17015838623047
V
-1,0
BOT
0,41.6997833333333
V
0,-1.17015838623047
V
-1,0
BOT
0,41.70645
V
0,-1.17063522338867
V
-1,0
BOT
0,41.7131166666667
V
0,-1.17111206054687
V
-1,0
BOT
0,41.7197833333333
V
0,-1.17111206054687
V
-1,0
BOT
0,41.72645
V
0,-1.17158889770508
V
-1,0
BOT
0,41.7331166666667
V
0,-1.17158889770508
V
-1,0
BOT
0,41.7397833333333
V
0,-1.17206573486328
V
-1,0
BOT
0,41.74645
V
0,-1.17301940917969
V
-1,0
BOT
0,41.7531166666667
V
0,-1.17397308349609
V
-1,0
BOT
0,41.7597833333333
V
0,-1.1749267578125
V
-1,0
BOT
0,41.76645
V
0,-1.17588043212891
V
-1,0
BOT
0,41.7731166666667
V
0,-1.17683410644531
V
-1,0
BOT
0,41.7797833333333
V
0,-1.17683410644531
V
-1,0
BOT
0,41.78645
V
0,-1.17683410644531
V
-1,0
BOT
0,41.7931166666667
V
0,-1.17683410644531
V
-1,0
BOT
0,41.7997833333333
V
0,-1.17683410644531
V
-1,0
BOT
0,41.80645
V
0,-1.17635726928711
V
-1,0
BOT
0,41.8131166666667
V
0,-1.17635726928711
V
-1,0
BOT
0,41.8197833333333
V
0,-1.17635726928711
V
-1,0
BOT
0,41.82645
V
0,-1.17635726928711
V
-1,0
BOT
0,41.8331166666667
V
0,-1.17588043212891
V
-1,0
BOT
0,41.8397833333333
V
0,-1.17588043212891
V
-1,0
BOT
0,41.84645
V
0,-1.1754035949707
V
-1,0
BOT
0,41.8531166666667
V
0,-1.1754035949707
V
-1,0
BOT
0,41.8597833333333
V
0,-1.1754035949707
V
-1,0
BOT
0,41.86645
V
0,-1.1754035949707
V
-1,0
BOT
0,41.8731166666667
V
0,-1.1754035949707
V
-1,0
BOT
0,41.8797833333333
V
0,-1.1754035949707
V
-1,0
BOT
0,41.88645
V
0,-1.1744499206543
V
-1,0
BOT
0,41.8931166666667
V
0,-1.17349624633789
V
-1,0
BOT
0,41.8997833333333
V
0,-1.17254257202148
V
-1,0
BOT
0,41.90645
V
0,-1.17158889770508
V
-1,0
BOT
0,41.9131166666667
V
0,-1.17063522338867
V
-1,0
BOT
0,41.9197833333333
V
0,-1.17015838623047
V
-1,0
BOT
0,41.92645
V
0,-1.17015838623047
V
-1,0
BOT
0,41.9331166666667
V
0,-1.17015838623047
V
-1,0
BOT
0,41.9397833333333
V
0,-1.17015838623047
V
-1,0
BOT
0,41.94645
V
0,-1.16968154907227
V
-1,0
BOT
0,41.9531166666667
V
0,-1.16920471191406
V
-1,0
BOT
0,41.9597833333333
V
0,-1.16872787475586
V
-1,0
BOT
0,41.96645
V
0,-1.16777420043945
V
-1,0
BOT
0,41.9731166666667
V
0,-1.16729736328125
V
-1,0
BOT
0,41.9797833333333
V
0,-1.16634368896484
V
-1,0
BOT
0,41.98645
V
0,-1.16634368896484
V
-1,0
BOT
0,41.9931166666667
V
0,-1.16634368896484
V
-1,0
BOT
0,41.9997833333333
V
0,-1.16682052612305
V
-1,0
BOT
0,42.00645
V
0,-1.16729736328125
V
-1,0
BOT
0,42.0131166666667
V
0,-1.16825103759766
V
-1,0
BOT
0,42.0197833333333
V
0,-1.16920471191406
V
-1,0
BOT
0,42.02645
V
0,-1.17015838623047
V
-1,0
BOT
0,42.0331166666667
V
0,-1.17063522338867
V
-1,0
BOT
0,42.0397833333333
V
0,-1.17158889770508
V
-1,0
BOT
0,42.04645
V
0,-1.17206573486328
V
-1,0
BOT
0,42.0531166666667
V
0,-1.17206573486328
V
-1,0
BOT
0,42.0597833333333
V
0,-1.17206573486328
V
-1,0
BOT
0,42.06645
V
0,-1.17206573486328
V
-1,0
BOT
0,42.0731166666667
V
0,-1.17158889770508
V
-1,0
BOT
0,42.0797833333333
V
0,-1.17111206054687
V
-1,0
BOT
0,42.08645
V
0,-1.17015838623047
V
-1,0
BOT
0,42.0931166666667
V
0,-1.16920471191406
V
-1,0
BOT
0,42.0997833333333
V
0,-1.16777420043945
V
-1,0
BOT
0,42.10645
V
0,-1.16634368896484
V
-1,0
BOT
0,42.1131166666667
V
0,-1.16586685180664
V
-1,0
BOT
0,42.1197833333333
V
0,-1.16491317749023
V
-1,0
BOT
0,42.12645
V
0,-1.16395950317383
V
-1,0
BOT
0,42.1331166666667
V
0,-1.16300582885742
V
-1,0
BOT
0,42.1397833333333
V
0,-1.16157531738281
V
-1,0
BOT
0,42.14645
V
0,-1.1601448059082
V
-1,0
BOT
0,42.1531166666667
V
0,-1.15728378295898
V
-1,0
BOT
0,42.1597833333333
V
0,-1.15442276000977
V
-1,0
BOT
0,42.16645
V
0,-1.15108489990234
V
-1,0
BOT
0,42.1731166666667
V
0,-1.14774703979492
V
-1,0
BOT
0,42.1797833333333
V
0,-1.1439323425293
V
-1,0
BOT
0,42.18645
V
0,-1.14011764526367
V
-1,0
BOT
0,42.1931166666667
V
0,-1.13582611083984
V
-1,0
BOT
0,42.1997833333333
V
0,-1.13105773925781
V
-1,0
BOT
0,42.20645
V
0,-1.12581253051758
V
-1,0
BOT
0,42.2131166666667
V
0,-1.12056732177734
V
-1,0
BOT
0,42.2197833333333
V
0,-1.11532211303711
V
-1,0
BOT
0,42.22645
V
0,-1.10960006713867
V
-1,0
BOT
0,42.2331166666667
V
0,-1.10387802124023
V
-1,0
BOT
0,42.2397833333333
V
0,-1.09767913818359
V
-1,0
BOT
0,42.24645
V
0,-1.09100341796875
V
-1,0
BOT
0,42.2531166666667
V
0,-1.08432769775391
V
-1,0
BOT
0,42.2597833333333
V
0,-1.07669830322266
V
-1,0
BOT
0,42.26645
V
0,-1.06954574584961
V
-1,0
BOT
0,42.2731166666667
V
0,-1.06287002563477
V
-1,0
BOT
0,42.2797833333333
V
0,-1.05571746826172
V
-1,0
BOT
0,42.28645
V
0,-1.04904174804687
V
-1,0
BOT
0,42.2931166666667
V
0,-1.04188919067383
V
-1,0
BOT
0,42.2997833333333
V
0,-1.03473663330078
V
-1,0
BOT
0,42.30645
V
0,-1.02710723876953
V
-1,0
BOT
0,42.3131166666667
V
0,-1.01947784423828
V
-1,0
BOT
0,42.3197833333333
V
0,-1.01232528686523
V
-1,0
BOT
0,42.32645
V
0,-1.00564956665039
V
-1,0
BOT
0,42.3331166666667
V
0,-0.998973846435547
V
-1,0
BOT
0,42.3397833333333
V
0,-0.993251800537109
V
-1,0
BOT
0,42.34645
V
0,-0.988006591796875
V
-1,0
BOT
0,42.3531166666667
V
0,-0.983715057373047
V
-1,0
BOT
0,42.3597833333333
V
0,-0.980377197265625
V
-1,0
BOT
0,42.36645
V
0,-0.977516174316406
V
-1,0
BOT
0,42.3731166666667
V
0,-0.976085662841797
V
-1,0
BOT
0,42.3797833333333
V
0,-0.975608825683594
V
-1,0
BOT
0,42.38645
V
0,-0.9765625
V
-1,0
BOT
0,42.3931166666667
V
0,-0.977516174316406
V
-1,0
BOT
0,42.3997833333333
V
0,-0.979423522949219
V
-1,0
BOT
0,42.40645
V
0,-0.982284545898438
V
-1,0
BOT
0,42.4131166666667
V
0,-0.986099243164063
V
-1,0
BOT
0,42.4197833333333
V
0,-0.990867614746094
V
-1,0
BOT
0,42.42645
V
0,-0.995635986328125
V
-1,0
BOT
0,42.4331166666667
V
0,-1.00088119506836
V
-1,0
BOT
0,42.4397833333333
V
0,-1.0066032409668
V
-1,0
BOT
0,42.44645
V
0,-1.01280212402344
V
-1,0
BOT
0,42.4531166666667
V
0,-1.01995468139648
V
-1,0
BOT
0,42.4597833333333
V
0,-1.02710723876953
V
-1,0
BOT
0,42.46645
V
0,-1.03521347045898
V
-1,0
BOT
0,42.4731166666667
V
0,-1.04331970214844
V
-1,0
BOT
0,42.4797833333333
V
0,-1.05094909667969
V
-1,0
BOT
0,42.48645
V
0,-1.05905532836914
V
-1,0
BOT
0,42.4931166666667
V
0,-1.06668472290039
V
-1,0
BOT
0,42.4997833333333
V
0,-1.07383728027344
V
-1,0
BOT
0,42.50645
V
0,-1.08051300048828
V
-1,0
BOT
0,42.5131166666667
V
0,-1.08766555786133
V
-1,0
BOT
0,42.5197833333333
V
0,-1.09386444091797
V
-1,0
BOT
0,42.52645
V
0,-1.10006332397461
V
-1,0
BOT
0,42.5331166666667
V
0,-1.10578536987305
V
-1,0
BOT
0,42.5397833333333
V
0,-1.11103057861328
V
-1,0
BOT
0,42.54645
V
0,-1.11627578735352
V
-1,0
BOT
0,42.5531166666667
V
0,-1.12152099609375
V
-1,0
BOT
0,42.5597833333333
V
0,-1.12676620483398
V
-1,0
BOT
0,42.56645
V
0,-1.13201141357422
V
-1,0
BOT
0,42.5731166666667
V
0,-1.13725662231445
V
-1,0
BOT
0,42.5797833333333
V
0,-1.14202499389648
V
-1,0
BOT
0,42.58645
V
0,-1.14727020263672
V
-1,0
BOT
0,42.5931166666667
V
0,-1.15156173706055
V
-1,0
BOT
0,42.5997833333333
V
0,-1.15633010864258
V
-1,0
BOT
0,42.60645
V
0,-1.16062164306641
V
-1,0
BOT
0,42.6131166666667
V
0,-1.16491317749023
V
-1,0
BOT
0,42.6197833333333
V
0,-1.16968154907227
V
-1,0
BOT
0,42.62645
V
0,-1.17349624633789
V
-1,0
BOT
0,42.6331166666667
V
0,-1.17778778076172
V
-1,0
BOT
0,42.6397833333333
V
0,-1.18112564086914
V
-1,0
BOT
0,42.64645
V
0,-1.18494033813477
V
-1,0
BOT
0,42.6531166666667
V
0,-1.18827819824219
V
-1,0
BOT
0,42.6597833333333
V
0,-1.19113922119141
V
-1,0
BOT
0,42.66645
V
0,-1.19400024414062
V
-1,0
BOT
0,42.6731166666667
V
0,-1.19686126708984
V
-1,0
BOT
0,42.6797833333333
V
0,-1.19972229003906
V
-1,0
BOT
0,42.68645
V
0,-1.20258331298828
V
-1,0
BOT
0,42.6931166666667
V
0,-1.2049674987793
V
-1,0
BOT
0,42.6997833333333
V
0,-1.20782852172852
V
-1,0
BOT
0,42.70645
V
0,-1.21068954467773
V
-1,0
BOT
0,42.7131166666667
V
0,-1.21307373046875
V
-1,0
BOT
0,42.7197833333333
V
0,-1.21545791625977
V
-1,0
BOT
0,42.72645
V
0,-1.21784210205078
V
-1,0
BOT
0,42.7331166666667
V
0,-1.2202262878418
V
-1,0
BOT
0,42.7397833333333
V
0,-1.22213363647461
V
-1,0
BOT
0,42.74645
V
0,-1.22404098510742
V
-1,0
BOT
0,42.7531166666667
V
0,-1.22594833374023
V
-1,0
BOT
0,42.7597833333333
V
0,-1.22785568237305
V
-1,0
BOT
0,42.76645
V
0,-1.22928619384766
V
-1,0
BOT
0,42.7731166666667
V
0,-1.23023986816406
V
-1,0
BOT
0,42.7797833333333
V
0,-1.23167037963867
V
-1,0
BOT
0,42.78645
V
0,-1.23262405395508
V
-1,0
BOT
0,42.7931166666667
V
0,-1.23310089111328
V
-1,0
BOT
0,42.7997833333333
V
0,-1.23357772827148
V
-1,0
BOT
0,42.80645
V
0,-1.23405456542969
V
-1,0
BOT
0,42.8131166666667
V
0,-1.23500823974609
V
-1,0
BOT
0,42.8197833333333
V
0,-1.2359619140625
V
-1,0
BOT
0,42.82645
V
0,-1.23691558837891
V
-1,0
BOT
0,42.8331166666667
V
0,-1.23786926269531
V
-1,0
BOT
0,42.8397833333333
V
0,-1.23834609985352
V
-1,0
BOT
0,42.84645
V
0,-1.23929977416992
V
-1,0
BOT
0,42.8531166666667
V
0,-1.23929977416992
V
-1,0
BOT
0,42.8597833333333
V
0,-1.23929977416992
V
-1,0
BOT
0,42.86645
V
0,-1.23929977416992
V
-1,0
BOT
0,42.8731166666667
V
0,-1.23929977416992
V
-1,0
BOT
0,42.8797833333333
V
0,-1.23929977416992
V
-1,0
BOT
0,42.88645
V
0,-1.23882293701172
V
-1,0
BOT
0,42.8931166666667
V
0,-1.23786926269531
V
-1,0
BOT
0,42.8997833333333
V
0,-1.23739242553711
V
-1,0
BOT
0,42.90645
V
0,-1.23691558837891
V
-1,0
BOT
0,42.9131166666667
V
0,-1.2359619140625
V
-1,0
BOT
0,42.9197833333333
V
0,-1.2359619140625
V
-1,0
BOT
0,42.92645
V
0,-1.2359619140625
V
-1,0
BOT
0,42.9331166666667
V
0,-1.2364387512207
V
-1,0
BOT
0,42.9397833333333
V
0,-1.2364387512207
V
-1,0
BOT
0,42.94645
V
0,-1.23691558837891
V
-1,0
BOT
0,42.9531166666667
V
0,-1.23691558837891
V
-1,0
BOT
0,42.9597833333333
V
0,-1.23739242553711
V
-1,0
BOT
0,42.96645
V
0,-1.23739242553711
V
-1,0
BOT
0,42.9731166666667
V
0,-1.23786926269531
V
-1,0
BOT
0,42.9797833333333
V
0,-1.23834609985352
V
-1,0
BOT
0,42.98645
V
0,-1.23834609985352
V
-1,0
BOT
0,42.9931166666667
V
0,-1.23786926269531
V
-1,0
BOT
0,42.9997833333333
V
0,-1.23786926269531
V
-1,0
BOT
0,43.00645
V
0,-1.23739242553711
V
-1,0
BOT
0,43.0131166666667
V
0,-1.23691558837891
V
-1,0
BOT
0,43.0197833333333
V
0,-1.23691558837891
V
-1,0
BOT
0,43.02645
V
0,-1.23739242553711
V
-1,0
BOT
0,43.0331166666667
V
0,-1.23739242553711
V
-1,0
BOT
0,43.0397833333333
V
0,-1.23739242553711
V
-1,0
BOT
0,43.04645
V
0,-1.23786926269531
V
-1,0
BOT
0,43.0531166666667
V
0,-1.23834609985352
V
-1,0
BOT
0,43.0597833333333
V
0,-1.23929977416992
V
-1,0
BOT
0,43.06645
V
0,-1.24073028564453
V
-1,0
BOT
0,43.0731166666667
V
0,-1.24216079711914
V
-1,0
BOT
0,43.0797833333333
V
0,-1.24359130859375
V
-1,0
BOT
0,43.08645
V
0,-1.24549865722656
V
-1,0
BOT
0,43.0931166666667
V
0,-1.24692916870117
V
-1,0
BOT
0,43.0997833333333
V
0,-1.24740600585937
V
-1,0
BOT
0,43.10645
V
0,-1.24883651733398
V
-1,0
BOT
0,43.1131166666667
V
0,-1.24979019165039
V
-1,0
BOT
0,43.1197833333333
V
0,-1.251220703125
V
-1,0
BOT
0,43.12645
V
0,-1.25265121459961
V
-1,0
BOT
0,43.1331166666667
V
0,-1.25408172607422
V
-1,0
BOT
0,43.1397833333333
V
0,-1.25598907470703
V
-1,0
BOT
0,43.14645
V
0,-1.25694274902344
V
-1,0
BOT
0,43.1531166666667
V
0,-1.25837326049805
V
-1,0
BOT
0,43.1597833333333
V
0,-1.25885009765625
V
-1,0
BOT
0,43.16645
V
0,-1.26028060913086
V
-1,0
BOT
0,43.1731166666667
V
0,-1.26123428344727
V
-1,0
BOT
0,43.1797833333333
V
0,-1.26218795776367
V
-1,0
BOT
0,43.18645
V
0,-1.26314163208008
V
-1,0
BOT
0,43.1931166666667
V
0,-1.26361846923828
V
-1,0
BOT
0,43.1997833333333
V
0,-1.26409530639648
V
-1,0
BOT
0,43.20645
V
0,-1.26409530639648
V
-1,0
BOT
0,43.2131166666667
V
0,-1.26409530639648
V
-1,0
BOT
0,43.2197833333333
V
0,-1.26409530639648
V
-1,0
BOT
0,43.22645
V
0,-1.26457214355469
V
-1,0
BOT
0,43.2331166666667
V
0,-1.26504898071289
V
-1,0
BOT
0,43.2397833333333
V
0,-1.26552581787109
V
-1,0
BOT
0,43.24645
V
0,-1.26552581787109
V
-1,0
BOT
0,43.2531166666667
V
0,-1.26552581787109
V
-1,0
BOT
0,43.2597833333333
V
0,-1.26552581787109
V
-1,0
BOT
0,43.26645
V
0,-1.26504898071289
V
-1,0
BOT
0,43.2731166666667
V
0,-1.26457214355469
V
-1,0
BOT
0,43.2797833333333
V
0,-1.26409530639648
V
-1,0
BOT
0,43.28645
V
0,-1.26409530639648
V
-1,0
BOT
0,43.2931166666667
V
0,-1.26457214355469
V
-1,0
BOT
0,43.2997833333333
V
0,-1.26504898071289
V
-1,0
BOT
0,43.30645
V
0,-1.26552581787109
V
-1,0
BOT
0,43.3131166666667
V
0,-1.2660026550293
V
-1,0
BOT
0,43.3197833333333
V
0,-1.2669563293457
V
-1,0
BOT
0,43.32645
V
0,-1.26743316650391
V
-1,0
BOT
0,43.3331166666667
V
0,-1.26838684082031
V
-1,0
BOT
0,43.3397833333333
V
0,-1.26886367797852
V
-1,0
BOT
0,43.34645
V
0,-1.26934051513672
V
-1,0
BOT
0,43.3531166666667
V
0,-1.27029418945312
V
-1,0
BOT
0,43.3597833333333
V
0,-1.27124786376953
V
-1,0
BOT
0,43.36645
V
0,-1.27220153808594
V
-1,0
BOT
0,43.3731166666667
V
0,-1.27315521240234
V
-1,0
BOT
0,43.3797833333333
V
0,-1.27410888671875
V
-1,0
BOT
0,43.38645
V
0,-1.27506256103516
V
-1,0
BOT
0,43.3931166666667
V
0,-1.27506256103516
V
-1,0
BOT
0,43.3997833333333
V
0,-1.27506256103516
V
-1,0
BOT
0,43.40645
V
0,-1.27458572387695
V
-1,0
BOT
0,43.4131166666667
V
0,-1.27410888671875
V
-1,0
BOT
0,43.4197833333333
V
0,-1.27410888671875
V
-1,0
BOT
0,43.42645
V
0,-1.27458572387695
V
-1,0
BOT
0,43.4331166666667
V
0,-1.27506256103516
V
-1,0
BOT
0,43.4397833333333
V
0,-1.27601623535156
V
-1,0
BOT
0,43.44645
V
0,-1.27649307250977
V
-1,0
BOT
0,43.4531166666667
V
0,-1.27696990966797
V
-1,0
BOT
0,43.4597833333333
V
0,-1.27744674682617
V
-1,0
BOT
0,43.46645
V
0,-1.27696990966797
V
-1,0
BOT
0,43.4731166666667
V
0,-1.27601623535156
V
-1,0
BOT
0,43.4797833333333
V
0,-1.27506256103516
V
-1,0
BOT
0,43.48645
V
0,-1.27458572387695
V
-1,0
BOT
0,43.4931166666667
V
0,-1.27410888671875
V
-1,0
BOT
0,43.4997833333333
V
0,-1.27363204956055
V
-1,0
BOT
0,43.50645
V
0,-1.27267837524414
V
-1,0
BOT
0,43.5131166666667
V
0,-1.27220153808594
V
-1,0
BOT
0,43.5197833333333
V
0,-1.27220153808594
V
-1,0
BOT
0,43.52645
V
0,-1.27172470092773
V
-1,0
BOT
0,43.5331166666667
V
0,-1.27077102661133
V
-1,0
BOT
0,43.5397833333333
V
0,-1.27077102661133
V
-1,0
BOT
0,43.54645
V
0,-1.27029418945312
V
-1,0
BOT
0,43.5531166666667
V
0,-1.26981735229492
V
-1,0
BOT
0,43.5597833333333
V
0,-1.26934051513672
V
-1,0
BOT
0,43.56645
V
0,-1.26934051513672
V
-1,0
BOT
0,43.5731166666667
V
0,-1.26886367797852
V
-1,0
BOT
0,43.5797833333333
V
0,-1.26886367797852
V
-1,0
BOT
0,43.58645
V
0,-1.26886367797852
V
-1,0
BOT
0,43.5931166666667
V
0,-1.26838684082031
V
-1,0
BOT
0,43.5997833333333
V
0,-1.26838684082031
V
-1,0
BOT
0,43.60645
V
0,-1.26838684082031
V
-1,0
BOT
0,43.6131166666667
V
0,-1.26791000366211
V
-1,0
BOT
0,43.6197833333333
V
0,-1.26743316650391
V
-1,0
BOT
0,43.62645
V
0,-1.2669563293457
V
-1,0
BOT
0,43.6331166666667
V
0,-1.2669563293457
V
-1,0
BOT
0,43.6397833333333
V
0,-1.2669563293457
V
-1,0
BOT
0,43.64645
V
0,-1.2669563293457
V
-1,0
BOT
0,43.6531166666667
V
0,-1.26743316650391
V
-1,0
BOT
0,43.6597833333333
V
0,-1.26743316650391
V
-1,0
BOT
0,43.66645
V
0,-1.26838684082031
V
-1,0
BOT
0,43.6731166666667
V
0,-1.26934051513672
V
-1,0
BOT
0,43.6797833333333
V
0,-1.26981735229492
V
-1,0
BOT
0,43.68645
V
0,-1.26981735229492
V
-1,0
BOT
0,43.6931166666667
V
0,-1.26981735229492
V
-1,0
BOT
0,43.6997833333333
V
0,-1.27029418945312
V
-1,0
BOT
0,43.70645
V
0,-1.27124786376953
V
-1,0
BOT
0,43.7131166666667
V
0,-1.27220153808594
V
-1,0
BOT
0,43.7197833333333
V
0,-1.27267837524414
V
-1,0
BOT
0,43.72645
V
0,-1.27315521240234
V
-1,0
BOT
0,43.7331166666667
V
0,-1.27315521240234
V
-1,0
BOT
0,43.7397833333333
V
0,-1.27267837524414
V
-1,0
BOT
0,43.74645
V
0,-1.27172470092773
V
-1,0
BOT
0,43.7531166666667
V
0,-1.27124786376953
V
-1,0
BOT
0,43.7597833333333
V
0,-1.27077102661133
V
-1,0
BOT
0,43.76645
V
0,-1.27029418945312
V
-1,0
BOT
0,43.7731166666667
V
0,-1.27029418945312
V
-1,0
BOT
0,43.7797833333333
V
0,-1.27029418945312
V
-1,0
BOT
0,43.78645
V
0,-1.27077102661133
V
-1,0
BOT
0,43.7931166666667
V
0,-1.27124786376953
V
-1,0
BOT
0,43.7997833333333
V
0,-1.27077102661133
V
-1,0
BOT
0,43.80645
V
0,-1.27077102661133
V
-1,0
BOT
0,43.8131166666667
V
0,-1.27029418945312
V
-1,0
BOT
0,43.8197833333333
V
0,-1.26934051513672
V
-1,0
BOT
0,43.82645
V
0,-1.26791000366211
V
-1,0
BOT
0,43.8331166666667
V
0,-1.2669563293457
V
-1,0
BOT
0,43.8397833333333
V
0,-1.2660026550293
V
-1,0
BOT
0,43.84645
V
0,-1.2660026550293
V
-1,0
BOT
0,43.8531166666667
V
0,-1.26552581787109
V
-1,0
BOT
0,43.8597833333333
V
0,-1.2660026550293
V
-1,0
BOT
0,43.86645
V
0,-1.2664794921875
V
-1,0
BOT
0,43.8731166666667
V
0,-1.2664794921875
V
-1,0
BOT
0,43.8797833333333
V
0,-1.26552581787109
V
-1,0
BOT
0,43.88645
V
0,-1.26409530639648
V
-1,0
BOT
0,43.8931166666667
V
0,-1.26266479492187
V
-1,0
BOT
0,43.8997833333333
V
0,-1.26218795776367
V
-1,0
BOT
0,43.90645
V
0,-1.26218795776367
V
-1,0
BOT
0,43.9131166666667
V
0,-1.26314163208008
V
-1,0
BOT
0,43.9197833333333
V
0,-1.26409530639648
V
-1,0
BOT
0,43.92645
V
0,-1.26552581787109
V
-1,0
BOT
0,43.9331166666667
V
0,-1.2660026550293
V
-1,0
BOT
0,43.9397833333333
V
0,-1.2660026550293
V
-1,0
BOT
0,43.94645
V
0,-1.26552581787109
V
-1,0
BOT
0,43.9531166666667
V
0,-1.26409530639648
V
-1,0
BOT
0,43.9597833333333
V
0,-1.26266479492187
V
-1,0
BOT
0,43.96645
V
0,-1.26123428344727
V
-1,0
BOT
0,43.9731166666667
V
0,-1.26028060913086
V
-1,0
BOT
0,43.9797833333333
V
0,-1.25932693481445
V
-1,0
BOT
0,43.98645
V
0,-1.25932693481445
V
-1,0
BOT
0,43.9931166666667
V
0,-1.25885009765625
V
-1,0
BOT
0,43.9997833333333
V
0,-1.25885009765625
V
-1,0
BOT
0,44.00645
V
0,-1.25837326049805
V
-1,0
BOT
0,44.0131166666667
V
0,-1.25741958618164
V
-1,0
BOT
0,44.0197833333333
V
0,-1.25694274902344
V
-1,0
BOT
0,44.02645
V
0,-1.25646591186523
V
-1,0
BOT
0,44.0331166666667
V
0,-1.25646591186523
V
-1,0
BOT
0,44.0397833333333
V
0,-1.25646591186523
V
-1,0
BOT
0,44.04645
V
0,-1.25694274902344
V
-1,0
BOT
0,44.0531166666667
V
0,-1.25741958618164
V
-1,0
BOT
0,44.0597833333333
V
0,-1.25789642333984
V
-1,0
BOT
0,44.06645
V
0,-1.25837326049805
V
-1,0
BOT
0,44.0731166666667
V
0,-1.25837326049805
V
-1,0
BOT
0,44.0797833333333
V
0,-1.25885009765625
V
-1,0
BOT
0,44.08645
V
0,-1.25980377197266
V
-1,0
BOT
0,44.0931166666667
V
0,-1.26075744628906
V
-1,0
BOT
0,44.0997833333333
V
0,-1.26171112060547
V
-1,0
BOT
0,44.10645
V
0,-1.26361846923828
V
-1,0
BOT
0,44.1131166666667
V
0,-1.26504898071289
V
-1,0
BOT
0,44.1197833333333
V
0,-1.2660026550293
V
-1,0
BOT
0,44.12645
V
0,-1.2669563293457
V
-1,0
BOT
0,44.1331166666667
V
0,-1.26791000366211
V
-1,0
BOT
0,44.1397833333333
V
0,-1.26886367797852
V
-1,0
BOT
0,44.14645
V
0,-1.26934051513672
V
-1,0
BOT
0,44.1531166666667
V
0,-1.27029418945312
V
-1,0
BOT
0,44.1597833333333
V
0,-1.27124786376953
V
-1,0
BOT
0,44.16645
V
0,-1.27267837524414
V
-1,0
BOT
0,44.1731166666667
V
0,-1.27363204956055
V
-1,0
BOT
0,44.1797833333333
V
0,-1.27458572387695
V
-1,0
BOT
0,44.18645
V
0,-1.27553939819336
V
-1,0
BOT
0,44.1931166666667
V
0,-1.27601623535156
V
-1,0
BOT
0,44.1997833333333
V
0,-1.27649307250977
V
-1,0
BOT
0,44.20645
V
0,-1.27649307250977
V
-1,0
BOT
0,44.2131166666667
V
0,-1.27649307250977
V
-1,0
BOT
0,44.2197833333333
V
0,-1.27649307250977
V
-1,0
BOT
0,44.22645
V
0,-1.27649307250977
V
-1,0
BOT
0,44.2331166666667
V
0,-1.27649307250977
V
-1,0
BOT
0,44.2397833333333
V
0,-1.27649307250977
V
-1,0
BOT
0,44.24645
V
0,-1.27649307250977
V
-1,0
BOT
0,44.2531166666667
V
0,-1.27649307250977
V
-1,0
BOT
0,44.2597833333333
V
0,-1.27696990966797
V
-1,0
BOT
0,44.26645
V
0,-1.27792358398437
V
-1,0
BOT
0,44.2731166666667
V
0,-1.27840042114258
V
-1,0
BOT
0,44.2797833333333
V
0,-1.27935409545898
V
-1,0
BOT
0,44.28645
V
0,-1.28078460693359
V
-1,0
BOT
0,44.2931166666667
V
0,-1.28173828125
V
-1,0
BOT
0,44.2997833333333
V
0,-1.2822151184082
V
-1,0
BOT
0,44.30645
V
0,-1.2822151184082
V
-1,0
BOT
0,44.3131166666667
V
0,-1.28269195556641
V
-1,0
BOT
0,44.3197833333333
V
0,-1.28269195556641
V
-1,0
BOT
0,44.32645
V
0,-1.28269195556641
V
-1,0
BOT
0,44.3331166666667
V
0,-1.28316879272461
V
-1,0
BOT
0,44.3397833333333
V
0,-1.28364562988281
V
-1,0
BOT
0,44.34645
V
0,-1.28412246704102
V
-1,0
BOT
0,44.3531166666667
V
0,-1.28459930419922
V
-1,0
BOT
0,44.3597833333333
V
0,-1.28507614135742
V
-1,0
BOT
0,44.36645
V
0,-1.28555297851562
V
-1,0
BOT
0,44.3731166666667
V
0,-1.28555297851562
V
-1,0
BOT
0,44.3797833333333
V
0,-1.28507614135742
V
-1,0
BOT
0,44.38645
V
0,-1.28555297851562
V
-1,0
BOT
0,44.3931166666667
V
0,-1.28602981567383
V
-1,0
BOT
0,44.3997833333333
V
0,-1.28602981567383
V
-1,0
BOT
0,44.40645
V
0,-1.28650665283203
V
-1,0
BOT
0,44.4131166666667
V
0,-1.28698348999023
V
-1,0
BOT
0,44.4197833333333
V
0,-1.28746032714844
V
-1,0
BOT
0,44.42645
V
0,-1.28746032714844
V
-1,0
BOT
0,44.4331166666667
V
0,-1.28746032714844
V
-1,0
BOT
0,44.4397833333333
V
0,-1.28746032714844
V
-1,0
BOT
0,44.44645
V
0,-1.28746032714844
V
-1,0
BOT
0,44.4531166666667
V
0,-1.28746032714844
V
-1,0
BOT
0,44.4597833333333
V
0,-1.28793716430664
V
-1,0
BOT
0,44.46645
V
0,-1.28841400146484
V
-1,0
BOT
0,44.4731166666667
V
0,-1.28889083862305
V
-1,0
BOT
0,44.4797833333333
V
0,-1.28936767578125
V
-1,0
BOT
0,44.48645
V
0,-1.28984451293945
V
-1,0
BOT
0,44.4931166666667
V
0,-1.29032135009766
V
-1,0
BOT
0,44.4997833333333
V
0,-1.29079818725586
V
-1,0
BOT
0,44.50645
V
0,-1.29079818725586
V
-1,0
BOT
0,44.5131166666667
V
0,-1.29079818725586
V
-1,0
BOT
0,44.5197833333333
V
0,-1.29079818725586
V
-1,0
BOT
0,44.52645
V
0,-1.29032135009766
V
-1,0
BOT
0,44.5331166666667
V
0,-1.28984451293945
V
-1,0
BOT
0,44.5397833333333
V
0,-1.28936767578125
V
-1,0
BOT
0,44.54645
V
0,-1.28841400146484
V
-1,0
BOT
0,44.5531166666667
V
0,-1.28793716430664
V
-1,0
BOT
0,44.5597833333333
V
0,-1.28746032714844
V
-1,0
BOT
0,44.56645
V
0,-1.28746032714844
V
-1,0
BOT
0,44.5731166666667
V
0,-1.28698348999023
V
-1,0
BOT
0,44.5797833333333
V
0,-1.28650665283203
V
-1,0
BOT
0,44.58645
V
0,-1.28555297851562
V
-1,0
BOT
0,44.5931166666667
V
0,-1.28459930419922
V
-1,0
BOT
0,44.5997833333333
V
0,-1.28364562988281
V
-1,0
BOT
0,44.60645
V
0,-1.2822151184082
V
-1,0
BOT
0,44.6131166666667
V
0,-1.28078460693359
V
-1,0
BOT
0,44.6197833333333
V
0,-1.27983093261719
V
-1,0
BOT
0,44.62645
V
0,-1.27887725830078
V
-1,0
BOT
0,44.6331166666667
V
0,-1.27792358398437
V
-1,0
BOT
0,44.6397833333333
V
0,-1.27744674682617
V
-1,0
BOT
0,44.64645
V
0,-1.27696990966797
V
-1,0
BOT
0,44.6531166666667
V
0,-1.27649307250977
V
-1,0
BOT
0,44.6597833333333
V
0,-1.27553939819336
V
-1,0
BOT
0,44.66645
V
0,-1.27506256103516
V
-1,0
BOT
0,44.6731166666667
V
0,-1.27363204956055
V
-1,0
BOT
0,44.6797833333333
V
0,-1.27267837524414
V
-1,0
BOT
0,44.68645
V
0,-1.27220153808594
V
-1,0
BOT
0,44.6931166666667
V
0,-1.27220153808594
V
-1,0
BOT
0,44.6997833333333
V
0,-1.27220153808594
V
-1,0
BOT
0,44.70645
V
0,-1.27220153808594
V
-1,0
BOT
0,44.7131166666667
V
0,-1.27267837524414
V
-1,0
BOT
0,44.7197833333333
V
0,-1.27220153808594
V
-1,0
BOT
0,44.72645
V
0,-1.27172470092773
V
-1,0
BOT
0,44.7331166666667
V
0,-1.27077102661133
V
-1,0
BOT
0,44.7397833333333
V
0,-1.26934051513672
V
-1,0
BOT
0,44.74645
V
0,-1.26791000366211
V
-1,0
BOT
0,44.7531166666667
V
0,-1.2660026550293
V
-1,0
BOT
0,44.7597833333333
V
0,-1.26457214355469
V
-1,0
BOT
0,44.76645
V
0,-1.26266479492187
V
-1,0
BOT
0,44.7731166666667
V
0,-1.26028060913086
V
-1,0
BOT
0,44.7797833333333
V
0,-1.25741958618164
V
-1,0
BOT
0,44.78645
V
0,-1.25455856323242
V
-1,0
BOT
0,44.7931166666667
V
0,-1.251220703125
V
-1,0
BOT
0,44.7997833333333
V
0,-1.24740600585937
V
-1,0
BOT
0,44.80645
V
0,-1.24359130859375
V
-1,0
BOT
0,44.8131166666667
V
0,-1.23882293701172
V
-1,0
BOT
0,44.8197833333333
V
0,-1.23405456542969
V
-1,0
BOT
0,44.82645
V
0,-1.22833251953125
V
-1,0
BOT
0,44.8331166666667
V
0,-1.22213363647461
V
-1,0
BOT
0,44.8397833333333
V
0,-1.21545791625977
V
-1,0
BOT
0,44.84645
V
0,-1.20925903320312
V
-1,0
BOT
0,44.8531166666667
V
0,-1.20306015014648
V
-1,0
BOT
0,44.8597833333333
V
0,-1.19638442993164
V
-1,0
BOT
0,44.86645
V
0,-1.190185546875
V
-1,0
BOT
0,44.8731166666667
V
0,-1.18350982666016
V
-1,0
BOT
0,44.8797833333333
V
0,-1.17778778076172
V
-1,0
BOT
0,44.88645
V
0,-1.17206573486328
V
-1,0
BOT
0,44.8931166666667
V
0,-1.16729736328125
V
-1,0
BOT
0,44.8997833333333
V
0,-1.16300582885742
V
-1,0
BOT
0,44.90645
V
0,-1.15966796875
V
-1,0
BOT
0,44.9131166666667
V
0,-1.15728378295898
V
-1,0
BOT
0,44.9197833333333
V
0,-1.15585327148437
V
-1,0
BOT
0,44.92645
V
0,-1.15537643432617
V
-1,0
BOT
0,44.9331166666667
V
0,-1.15585327148437
V
-1,0
BOT
0,44.9397833333333
V
0,-1.15728378295898
V
-1,0
BOT
0,44.94645
V
0,-1.1601448059082
V
-1,0
BOT
0,44.9531166666667
V
0,-1.16395950317383
V
-1,0
BOT
0,44.9597833333333
V
0,-1.16872787475586
V
-1,0
BOT
0,44.96645
V
0,-1.17397308349609
V
-1,0
BOT
0,44.9731166666667
V
0,-1.17969512939453
V
-1,0
BOT
0,44.9797833333333
V
0,-1.18494033813477
V
-1,0
BOT
0,44.98645
V
0,-1.1906623840332
V
-1,0
BOT
0,44.9931166666667
V
0,-1.19590759277344
V
-1,0
BOT
0,44.9997833333333
V
0,-1.20115280151367
V
-1,0
BOT
0,45.00645
V
0,-1.2059211730957
V
-1,0
BOT
0,45.0131166666667
V
0,-1.21116638183594
V
-1,0
BOT
0,45.0197833333333
V
0,-1.21641159057617
V
-1,0
BOT
0,45.02645
V
0,-1.2211799621582
V
-1,0
BOT
0,45.0331166666667
V
0,-1.22499465942383
V
-1,0
BOT
0,45.0397833333333
V
0,-1.22880935668945
V
-1,0
BOT
0,45.04645
V
0,-1.23167037963867
V
-1,0
BOT
0,45.0531166666667
V
0,-1.23357772827148
V
-1,0
BOT
0,45.0597833333333
V
0,-1.23500823974609
V
-1,0
BOT
0,45.06645
V
0,-1.2359619140625
V
-1,0
BOT
0,45.0731166666667
V
0,-1.23739242553711
V
-1,0
BOT
0,45.0797833333333
V
0,-1.23929977416992
V
-1,0
BOT
0,45.08645
V
0,-1.24168395996094
V
-1,0
BOT
0,45.0931166666667
V
0,-1.24311447143555
V
-1,0
BOT
0,45.0997833333333
V
0,-1.24406814575195
V
-1,0
BOT
0,45.10645
V
0,-1.24502182006836
V
-1,0
BOT
0,45.1131166666667
V
0,-1.24549865722656
V
-1,0
BOT
0,45.1197833333333
V
0,-1.24597549438477
V
-1,0
BOT
0,45.12645
V
0,-1.24597549438477
V
-1,0
BOT
0,45.1331166666667
V
0,-1.24645233154297
V
-1,0
BOT
0,45.1397833333333
V
0,-1.24740600585937
V
-1,0
BOT
0,45.14645
V
0,-1.24788284301758
V
-1,0
BOT
0,45.1531166666667
V
0,-1.24883651733398
V
-1,0
BOT
0,45.1597833333333
V
0,-1.24931335449219
V
-1,0
BOT
0,45.16645
V
0,-1.24931335449219
V
-1,0
BOT
0,45.1731166666667
V
0,-1.24883651733398
V
-1,0
BOT
0,45.1797833333333
V
0,-1.24931335449219
V
-1,0
BOT
0,45.18645
V
0,-1.24979019165039
V
-1,0
BOT
0,45.1931166666667
V
0,-1.25026702880859
V
-1,0
BOT
0,45.1997833333333
V
0,-1.2507438659668
V
-1,0
BOT
0,45.20645
V
0,-1.251220703125
V
-1,0
BOT
0,45.2131166666667
V
0,-1.2516975402832
V
-1,0
BOT
0,45.2197833333333
V
0,-1.25217437744141
V
-1,0
BOT
0,45.22645
V
0,-1.25265121459961
V
-1,0
BOT
0,45.2331166666667
V
0,-1.25360488891602
V
-1,0
BOT
0,45.2397833333333
V
0,-1.25408172607422
V
-1,0
BOT
0,45.24645
V
0,-1.25503540039062
V
-1,0
BOT
0,45.2531166666667
V
0,-1.25646591186523
V
-1,0
BOT
0,45.2597833333333
V
0,-1.25789642333984
V
-1,0
BOT
0,45.26645
V
0,-1.25885009765625
V
-1,0
BOT
0,45.2731166666667
V
0,-1.25980377197266
V
-1,0
BOT
0,45.2797833333333
V
0,-1.26075744628906
V
-1,0
BOT
0,45.28645
V
0,-1.26123428344727
V
-1,0
BOT
0,45.2931166666667
V
0,-1.26218795776367
V
-1,0
BOT
0,45.2997833333333
V
0,-1.26266479492187
V
-1,0
BOT
0,45.30645
V
0,-1.26266479492187
V
-1,0
BOT
0,45.3131166666667
V
0,-1.26266479492187
V
-1,0
BOT
0,45.3197833333333
V
0,-1.26266479492187
V
-1,0
BOT
0,45.32645
V
0,-1.26266479492187
V
-1,0
BOT
0,45.3331166666667
V
0,-1.26314163208008
V
-1,0
BOT
0,45.3397833333333
V
0,-1.26314163208008
V
-1,0
BOT
0,45.34645
V
0,-1.26361846923828
V
-1,0
BOT
0,45.3531166666667
V
0,-1.26409530639648
V
-1,0
BOT
0,45.3597833333333
V
0,-1.26457214355469
V
-1,0
BOT
0,45.36645
V
0,-1.26457214355469
V
-1,0
BOT
0,45.3731166666667
V
0,-1.26457214355469
V
-1,0
BOT
0,45.3797833333333
V
0,-1.26409530639648
V
-1,0
BOT
0,45.38645
V
0,-1.26409530639648
V
-1,0
BOT
0,45.3931166666667
V
0,-1.26361846923828
V
-1,0
BOT
0,45.3997833333333
V
0,-1.26361846923828
V
-1,0
BOT
0,45.40645
V
0,-1.26361846923828
V
-1,0
BOT
0,45.4131166666667
V
0,-1.26361846923828
V
-1,0
BOT
0,45.4197833333333
V
0,-1.26409530639648
V
-1,0
BOT
0,45.42645
V
0,-1.26409530639648
V
-1,0
BOT
0,45.4331166666667
V
0,-1.26409530639648
V
-1,0
BOT
0,45.4397833333333
V
0,-1.26409530639648
V
-1,0
BOT
0,45.44645
V
0,-1.26504898071289
V
-1,0
BOT
0,45.4531166666667
V
0,-1.26552581787109
V
-1,0
BOT
0,45.4597833333333
V
0,-1.2660026550293
V
-1,0
BOT
0,45.46645
V
0,-1.2669563293457
V
-1,0
BOT
0,45.4731166666667
V
0,-1.26743316650391
V
-1,0
BOT
0,45.4797833333333
V
0,-1.26791000366211
V
-1,0
BOT
0,45.48645
V
0,-1.26791000366211
V
-1,0
BOT
0,45.4931166666667
V
0,-1.26743316650391
V
-1,0
BOT
0,45.4997833333333
V
0,-1.26743316650391
V
-1,0
BOT
0,45.50645
V
0,-1.2669563293457
V
-1,0
BOT
0,45.5131166666667
V
0,-1.2664794921875
V
-1,0
BOT
0,45.5197833333333
V
0,-1.2664794921875
V
-1,0
BOT
0,45.52645
V
0,-1.2660026550293
V
-1,0
BOT
0,45.5331166666667
V
0,-1.26552581787109
V
-1,0
BOT
0,45.5397833333333
V
0,-1.26504898071289
V
-1,0
BOT
0,45.54645
V
0,-1.26457214355469
V
-1,0
BOT
0,45.5531166666667
V
0,-1.26457214355469
V
-1,0
BOT
0,45.5597833333333
V
0,-1.26457214355469
V
-1,0
BOT
0,45.56645
V
0,-1.26504898071289
V
-1,0
BOT
0,45.5731166666667
V
0,-1.26504898071289
V
-1,0
BOT
0,45.5797833333333
V
0,-1.26552581787109
V
-1,0
BOT
0,45.58645
V
0,-1.26552581787109
V
-1,0
BOT
0,45.5931166666667
V
0,-1.26504898071289
V
-1,0
BOT
0,45.5997833333333
V
0,-1.26504898071289
V
-1,0
BOT
0,45.60645
V
0,-1.26504898071289
V
-1,0
BOT
0,45.6131166666667
V
0,-1.26504898071289
V
-1,0
BOT
0,45.6197833333333
V
0,-1.26552581787109
V
-1,0
BOT
0,45.62645
V
0,-1.2660026550293
V
-1,0
BOT
0,45.6331166666667
V
0,-1.2664794921875
V
-1,0
BOT
0,45.6397833333333
V
0,-1.2669563293457
V
-1,0
BOT
0,45.64645
V
0,-1.26743316650391
V
-1,0
BOT
0,45.6531166666667
V
0,-1.26743316650391
V
-1,0
BOT
0,45.6597833333333
V
0,-1.26791000366211
V
-1,0
BOT
0,45.66645
V
0,-1.26886367797852
V
-1,0
BOT
0,45.6731166666667
V
0,-1.26934051513672
V
-1,0
BOT
0,45.6797833333333
V
0,-1.26934051513672
V
-1,0
BOT
0,45.68645
V
0,-1.26886367797852
V
-1,0
BOT
0,45.6931166666667
V
0,-1.26886367797852
V
-1,0
BOT
0,45.6997833333333
V
0,-1.26838684082031
V
-1,0
BOT
0,45.70645
V
0,-1.26791000366211
V
-1,0
BOT
0,45.7131166666667
V
0,-1.26743316650391
V
-1,0
BOT
0,45.7197833333333
V
0,-1.26791000366211
V
-1,0
BOT
0,45.72645
V
0,-1.26886367797852
V
-1,0
BOT
0,45.7331166666667
V
0,-1.26934051513672
V
-1,0
BOT
0,45.7397833333333
V
0,-1.26934051513672
V
-1,0
BOT
0,45.74645
V
0,-1.26934051513672
V
-1,0
BOT
0,45.7531166666667
V
0,-1.26934051513672
V
-1,0
BOT
0,45.7597833333333
V
0,-1.26934051513672
V
-1,0
BOT
0,45.76645
V
0,-1.26934051513672
V
-1,0
BOT
0,45.7731166666667
V
0,-1.26886367797852
V
-1,0
BOT
0,45.7797833333333
V
0,-1.26934051513672
V
-1,0
BOT
0,45.78645
V
0,-1.26981735229492
V
-1,0
BOT
0,45.7931166666667
V
0,-1.27029418945312
V
-1,0
BOT
0,45.7997833333333
V
0,-1.26981735229492
V
-1,0
BOT
0,45.80645
V
0,-1.27029418945312
V
-1,0
BOT
0,45.8131166666667
V
0,-1.27077102661133
V
-1,0
BOT
0,45.8197833333333
V
0,-1.27077102661133
V
-1,0
BOT
0,45.82645
V
0,-1.27077102661133
V
-1,0
BOT
0,45.8331166666667
V
0,-1.27077102661133
V
-1,0
BOT
0,45.8397833333333
V
0,-1.27124786376953
V
-1,0
BOT
0,45.84645
V
0,-1.27172470092773
V
-1,0
BOT
0,45.8531166666667
V
0,-1.27220153808594
V
-1,0
BOT
0,45.8597833333333
V
0,-1.27315521240234
V
-1,0
BOT
0,45.86645
V
0,-1.27363204956055
V
-1,0
BOT
0,45.8731166666667
V
0,-1.27410888671875
V
-1,0
BOT
0,45.8797833333333
V
0,-1.27410888671875
V
-1,0
BOT
0,45.88645
V
0,-1.27410888671875
V
-1,0
BOT
0,45.8931166666667
V
0,-1.27315521240234
V
-1,0
BOT
0,45.8997833333333
V
0,-1.27267837524414
V
-1,0
BOT
0,45.90645
V
0,-1.27124786376953
V
-1,0
BOT
0,45.9131166666667
V
0,-1.27029418945312
V
-1,0
BOT
0,45.9197833333333
V
0,-1.26934051513672
V
-1,0
BOT
0,45.92645
V
0,-1.26791000366211
V
-1,0
BOT
0,45.9331166666667
V
0,-1.26743316650391
V
-1,0
BOT
0,45.9397833333333
V
0,-1.2664794921875
V
-1,0
BOT
0,45.94645
V
0,-1.2660026550293
V
-1,0
BOT
0,45.9531166666667
V
0,-1.26552581787109
V
-1,0
BOT
0,45.9597833333333
V
0,-1.26504898071289
V
-1,0
BOT
0,45.96645
V
0,-1.26409530639648
V
-1,0
BOT
0,45.9731166666667
V
0,-1.26266479492187
V
-1,0
BOT
0,45.9797833333333
V
0,-1.26171112060547
V
-1,0
BOT
0,45.98645
V
0,-1.26075744628906
V
-1,0
BOT
0,45.9931166666667
V
0,-1.25980377197266
V
-1,0
BOT
0,45.9997833333333
V
0,-1.25885009765625
V
-1,0
BOT
0,46.00645
V
0,-1.25741958618164
V
-1,0
BOT
0,46.0131166666667
V
0,-1.25598907470703
V
-1,0
BOT
0,46.0197833333333
V
0,-1.25455856323242
V
-1,0
BOT
0,46.02645
V
0,-1.25312805175781
V
-1,0
BOT
0,46.0331166666667
V
0,-1.2516975402832
V
-1,0
BOT
0,46.0397833333333
V
0,-1.2507438659668
V
-1,0
BOT
0,46.04645
V
0,-1.24931335449219
V
-1,0
BOT
0,46.0531166666667
V
0,-1.24788284301758
V
-1,0
BOT
0,46.0597833333333
V
0,-1.24692916870117
V
-1,0
BOT
0,46.06645
V
0,-1.24549865722656
V
-1,0
BOT
0,46.0731166666667
V
0,-1.24359130859375
V
-1,0
BOT
0,46.0797833333333
V
0,-1.24168395996094
V
-1,0
BOT
0,46.08645
V
0,-1.23977661132812
V
-1,0
BOT
0,46.0931166666667
V
0,-1.23834609985352
V
-1,0
BOT
0,46.0997833333333
V
0,-1.2364387512207
V
-1,0
BOT
0,46.10645
V
0,-1.23405456542969
V
-1,0
BOT
0,46.1131166666667
V
0,-1.23119354248047
V
-1,0
BOT
0,46.1197833333333
V
0,-1.22833251953125
V
-1,0
BOT
0,46.12645
V
0,-1.22499465942383
V
-1,0
BOT
0,46.1331166666667
V
0,-1.22213363647461
V
-1,0
BOT
0,46.1397833333333
V
0,-1.21974945068359
V
-1,0
BOT
0,46.14645
V
0,-1.21784210205078
V
-1,0
BOT
0,46.1531166666667
V
0,-1.21593475341797
V
-1,0
BOT
0,46.1597833333333
V
0,-1.21402740478516
V
-1,0
BOT
0,46.16645
V
0,-1.21212005615234
V
-1,0
BOT
0,46.1731166666667
V
0,-1.20973587036133
V
-1,0
BOT
0,46.1797833333333
V
0,-1.20782852172852
V
-1,0
BOT
0,46.18645
V
0,-1.2059211730957
V
-1,0
BOT
0,46.1931166666667
V
0,-1.2049674987793
V
-1,0
BOT
0,46.1997833333333
V
0,-1.20401382446289
V
-1,0
BOT
0,46.20645
V
0,-1.20401382446289
V
-1,0
BOT
0,46.2131166666667
V
0,-1.20449066162109
V
-1,0
BOT
0,46.2197833333333
V
0,-1.2049674987793
V
-1,0
BOT
0,46.22645
V
0,-1.2049674987793
V
-1,0
BOT
0,46.2331166666667
V
0,-1.2049674987793
V
-1,0
BOT
0,46.2397833333333
V
0,-1.2049674987793
V
-1,0
BOT
0,46.24645
V
0,-1.20449066162109
V
-1,0
BOT
0,46.2531166666667
V
0,-1.20449066162109
V
-1,0
BOT
0,46.2597833333333
V
0,-1.20353698730469
V
-1,0
BOT
0,46.26645
V
0,-1.20258331298828
V
-1,0
BOT
0,46.2731166666667
V
0,-1.20067596435547
V
-1,0
BOT
0,46.2797833333333
V
0,-1.19781494140625
V
-1,0
BOT
0,46.28645
V
0,-1.19400024414062
V
-1,0
BOT
0,46.2931166666667
V
0,-1.18875503540039
V
-1,0
BOT
0,46.2997833333333
V
0,-1.18207931518555
V
-1,0
BOT
0,46.30645
V
0,-1.17349624633789
V
-1,0
BOT
0,46.3131166666667
V
0,-1.16348266601562
V
-1,0
BOT
0,46.3197833333333
V
0,-1.15203857421875
V
-1,0
BOT
0,46.32645
V
0,-1.13916397094727
V
-1,0
BOT
0,46.3331166666667
V
0,-1.12438201904297
V
-1,0
BOT
0,46.3397833333333
V
0,-1.10864639282227
V
-1,0
BOT
0,46.34645
V
0,-1.09195709228516
V
-1,0
BOT
0,46.3531166666667
V
0,-1.07431411743164
V
-1,0
BOT
0,46.3597833333333
V
0,-1.05619430541992
V
-1,0
BOT
0,46.36645
V
0,-1.03855133056641
V
-1,0
BOT
0,46.3731166666667
V
0,-1.0218620300293
V
-1,0
BOT
0,46.3797833333333
V
0,-1.00564956665039
V
-1,0
BOT
0,46.38645
V
0,-0.990867614746094
V
-1,0
BOT
0,46.3931166666667
V
0,-0.977039337158203
V
-1,0
BOT
0,46.3997833333333
V
0,-0.965118408203125
V
-1,0
BOT
0,46.40645
V
0,-0.955581665039063
V
-1,0
BOT
0,46.4131166666667
V
0,-0.947952270507813
V
-1,0
BOT
0,46.4197833333333
V
0,-0.942707061767578
V
-1,0
BOT
0,46.42645
V
0,-0.940322875976563
V
-1,0
BOT
0,46.4331166666667
V
0,-0.940799713134766
V
-1,0
BOT
0,46.4397833333333
V
0,-0.944614410400391
V
-1,0
BOT
0,46.44645
V
0,-0.950336456298828
V
-1,0
BOT
0,46.4531166666667
V
0,-0.958442687988281
V
-1,0
BOT
0,46.4597833333333
V
0,-0.968456268310547
V
-1,0
BOT
0,46.46645
V
0,-0.980377197265625
V
-1,0
BOT
0,46.4731166666667
V
0,-0.993251800537109
V
-1,0
BOT
0,46.4797833333333
V
0,-1.0066032409668
V
-1,0
BOT
0,46.48645
V
0,-1.01995468139648
V
-1,0
BOT
0,46.4931166666667
V
0,-1.03282928466797
V
-1,0
BOT
0,46.4997833333333
V
0,-1.04475021362305
V
-1,0
BOT
0,46.50645
V
0,-1.05619430541992
V
-1,0
BOT
0,46.5131166666667
V
0,-1.06620788574219
V
-1,0
BOT
0,46.5197833333333
V
0,-1.07431411743164
V
-1,0
BOT
0,46.52645
V
0,-1.08098983764648
V
-1,0
BOT
0,46.5331166666667
V
0,-1.08671188354492
V
-1,0
BOT
0,46.5397833333333
V
0,-1.09052658081055
V
-1,0
BOT
0,46.54645
V
0,-1.09338760375977
V
-1,0
BOT
0,46.5531166666667
V
0,-1.09481811523437
V
-1,0
BOT
0,46.5597833333333
V
0,-1.09529495239258
V
-1,0
BOT
0,46.56645
V
0,-1.09577178955078
V
-1,0
BOT
0,46.5731166666667
V
0,-1.09529495239258
V
-1,0
BOT
0,46.5797833333333
V
0,-1.09481811523437
V
-1,0
BOT
0,46.58645
V
0,-1.09434127807617
V
-1,0
BOT
0,46.5931166666667
V
0,-1.09434127807617
V
-1,0
BOT
0,46.5997833333333
V
0,-1.09386444091797
V
-1,0
BOT
0,46.60645
V
0,-1.09386444091797
V
-1,0
BOT
0,46.6131166666667
V
0,-1.09434127807617
V
-1,0
BOT
0,46.6197833333333
V
0,-1.09481811523437
V
-1,0
BOT
0,46.62645
V
0,-1.09672546386719
V
-1,0
BOT
0,46.6331166666667
V
0,-1.0986328125
V
-1,0
BOT
0,46.6397833333333
V
0,-1.10149383544922
V
-1,0
BOT
0,46.64645
V
0,-1.10530853271484
V
-1,0
BOT
0,46.6531166666667
V
0,-1.11007690429687
V
-1,0
BOT
0,46.6597833333333
V
0,-1.11484527587891
V
-1,0
BOT
0,46.66645
V
0,-1.12056732177734
V
-1,0
BOT
0,46.6731166666667
V
0,-1.12676620483398
V
-1,0
BOT
0,46.6797833333333
V
0,-1.13344192504883
V
-1,0
BOT
0,46.68645
V
0,-1.14059448242187
V
-1,0
BOT
0,46.6931166666667
V
0,-1.14774703979492
V
-1,0
BOT
0,46.6997833333333
V
0,-1.15489959716797
V
-1,0
BOT
0,46.70645
V
0,-1.16157531738281
V
-1,0
BOT
0,46.7131166666667
V
0,-1.16825103759766
V
-1,0
BOT
0,46.7197833333333
V
0,-1.1754035949707
V
-1,0
BOT
0,46.72645
V
0,-1.18255615234375
V
-1,0
BOT
0,46.7331166666667
V
0,-1.18923187255859
V
-1,0
BOT
0,46.7397833333333
V
0,-1.19495391845703
V
-1,0
BOT
0,46.74645
V
0,-1.20067596435547
V
-1,0
BOT
0,46.7531166666667
V
0,-1.2049674987793
V
-1,0
BOT
0,46.7597833333333
V
0,-1.20830535888672
V
-1,0
BOT
0,46.76645
V
0,-1.21068954467773
V
-1,0
BOT
0,46.7731166666667
V
0,-1.21259689331055
V
-1,0
BOT
0,46.7797833333333
V
0,-1.21402740478516
V
-1,0
BOT
0,46.78645
V
0,-1.21450424194336
V
-1,0
BOT
0,46.7931166666667
V
0,-1.21402740478516
V
-1,0
BOT
0,46.7997833333333
V
0,-1.21307373046875
V
-1,0
BOT
0,46.80645
V
0,-1.21068954467773
V
-1,0
BOT
0,46.8131166666667
V
0,-1.20782852172852
V
-1,0
BOT
0,46.8197833333333
V
0,-1.20449066162109
V
-1,0
BOT
0,46.82645
V
0,-1.20067596435547
V
-1,0
BOT
0,46.8331166666667
V
0,-1.19733810424805
V
-1,0
BOT
0,46.8397833333333
V
0,-1.19352340698242
V
-1,0
BOT
0,46.84645
V
0,-1.1897087097168
V
-1,0
BOT
0,46.8531166666667
V
0,-1.18589401245117
V
-1,0
BOT
0,46.8597833333333
V
0,-1.18207931518555
V
-1,0
BOT
0,46.86645
V
0,-1.17874145507812
V
-1,0
BOT
0,46.8731166666667
V
0,-1.1754035949707
V
-1,0
BOT
0,46.8797833333333
V
0,-1.17254257202148
V
-1,0
BOT
0,46.88645
V
0,-1.17063522338867
V
-1,0
BOT
0,46.8931166666667
V
0,-1.16872787475586
V
-1,0
BOT
0,46.8997833333333
V
0,-1.16729736328125
V
-1,0
BOT
0,46.90645
V
0,-1.16682052612305
V
-1,0
BOT
0,46.9131166666667
V
0,-1.16682052612305
V
-1,0
BOT
0,46.9197833333333
V
0,-1.16777420043945
V
-1,0
BOT
0,46.92645
V
0,-1.16920471191406
V
-1,0
BOT
0,46.9331166666667
V
0,-1.17111206054687
V
-1,0
BOT
0,46.9397833333333
V
0,-1.17397308349609
V
-1,0
BOT
0,46.94645
V
0,-1.17635726928711
V
-1,0
BOT
0,46.9531166666667
V
0,-1.17921829223633
V
-1,0
BOT
0,46.9597833333333
V
0,-1.18160247802734
V
-1,0
BOT
0,46.96645
V
0,-1.18398666381836
V
-1,0
BOT
0,46.9731166666667
V
0,-1.18684768676758
V
-1,0
BOT
0,46.9797833333333
V
0,-1.1897087097168
V
-1,0
BOT
0,46.98645
V
0,-1.19256973266602
V
-1,0
BOT
0,46.9931166666667
V
0,-1.19590759277344
V
-1,0
BOT
0,46.9997833333333
V
0,-1.19924545288086
V
-1,0
BOT
0,47.00645
V
0,-1.20258331298828
V
-1,0
BOT
0,47.0131166666667
V
0,-1.2059211730957
V
-1,0
BOT
0,47.0197833333333
V
0,-1.20925903320312
V
-1,0
BOT
0,47.02645
V
0,-1.21164321899414
V
-1,0
BOT
0,47.0331166666667
V
0,-1.21450424194336
V
-1,0
BOT
0,47.0397833333333
V
0,-1.21688842773437
V
-1,0
BOT
0,47.04645
V
0,-1.21927261352539
V
-1,0
BOT
0,47.0531166666667
V
0,-1.2211799621582
V
-1,0
BOT
0,47.0597833333333
V
0,-1.22308731079102
V
-1,0
BOT
0,47.06645
V
0,-1.22451782226562
V
-1,0
BOT
0,47.0731166666667
V
0,-1.22547149658203
V
-1,0
BOT
0,47.0797833333333
V
0,-1.22642517089844
V
-1,0
BOT
0,47.08645
V
0,-1.22737884521484
V
-1,0
BOT
0,47.0931166666667
V
0,-1.22785568237305
V
-1,0
BOT
0,47.0997833333333
V
0,-1.22833251953125
V
-1,0
BOT
0,47.10645
V
0,-1.22928619384766
V
-1,0
BOT
0,47.1131166666667
V
0,-1.23023986816406
V
-1,0
BOT
0,47.1197833333333
V
0,-1.23119354248047
V
-1,0
BOT
0,47.12645
V
0,-1.23214721679687
V
-1,0
BOT
0,47.1331166666667
V
0,-1.23357772827148
V
-1,0
BOT
0,47.1397833333333
V
0,-1.23453140258789
V
-1,0
BOT
0,47.14645
V
0,-1.2354850769043
V
-1,0
BOT
0,47.1531166666667
V
0,-1.2364387512207
V
-1,0
BOT
0,47.1597833333333
V
0,-1.23691558837891
V
-1,0
BOT
0,47.16645
V
0,-1.23691558837891
V
-1,0
BOT
0,47.1731166666667
V
0,-1.23691558837891
V
-1,0
BOT
0,47.1797833333333
V
0,-1.2364387512207
V
-1,0
BOT
0,47.18645
V
0,-1.2359619140625
V
-1,0
BOT
0,47.1931166666667
V
0,-1.2354850769043
V
-1,0
BOT
0,47.1997833333333
V
0,-1.23500823974609
V
-1,0
BOT
0,47.20645
V
0,-1.23453140258789
V
-1,0
BOT
0,47.2131166666667
V
0,-1.23453140258789
V
-1,0
BOT
0,47.2197833333333
V
0,-1.23453140258789
V
-1,0
BOT
0,47.22645
V
0,-1.23453140258789
V
-1,0
BOT
0,47.2331166666667
V
0,-1.23405456542969
V
-1,0
BOT
0,47.2397833333333
V
0,-1.23310089111328
V
-1,0
BOT
0,47.24645
V
0,-1.23214721679687
V
-1,0
BOT
0,47.2531166666667
V
0,-1.23071670532227
V
-1,0
BOT
0,47.2597833333333
V
0,-1.22880935668945
V
-1,0
BOT
0,47.26645
V
0,-1.22642517089844
V
-1,0
BOT
0,47.2731166666667
V
0,-1.22451782226562
V
-1,0
BOT
0,47.2797833333333
V
0,-1.22261047363281
V
-1,0
BOT
0,47.28645
V
0,-1.220703125
V
-1,0
BOT
0,47.2931166666667
V
0,-1.21927261352539
V
-1,0
BOT
0,47.2997833333333
V
0,-1.21736526489258
V
-1,0
BOT
0,47.30645
V
0,-1.21545791625977
V
-1,0
BOT
0,47.3131166666667
V
0,-1.21402740478516
V
-1,0
BOT
0,47.3197833333333
V
0,-1.21212005615234
V
-1,0
BOT
0,47.32645
V
0,-1.21021270751953
V
-1,0
BOT
0,47.3331166666667
V
0,-1.20878219604492
V
-1,0
BOT
0,47.3397833333333
V
0,-1.20735168457031
V
-1,0
BOT
0,47.34645
V
0,-1.20687484741211
V
-1,0
BOT
0,47.3531166666667
V
0,-1.2059211730957
V
-1,0
BOT
0,47.3597833333333
V
0,-1.2054443359375
V
-1,0
BOT
0,47.36645
V
0,-1.2049674987793
V
-1,0
BOT
0,47.3731166666667
V
0,-1.20401382446289
V
-1,0
BOT
0,47.3797833333333
V
0,-1.20258331298828
V
-1,0
BOT
0,47.38645
V
0,-1.20162963867187
V
-1,0
BOT
0,47.3931166666667
V
0,-1.20115280151367
V
-1,0
BOT
0,47.3997833333333
V
0,-1.20115280151367
V
-1,0
BOT
0,47.40645
V
0,-1.20115280151367
V
-1,0
BOT
0,47.4131166666667
V
0,-1.20258331298828
V
-1,0
BOT
0,47.4197833333333
V
0,-1.20401382446289
V
-1,0
BOT
0,47.42645
V
0,-1.2054443359375
V
-1,0
BOT
0,47.4331166666667
V
0,-1.20639801025391
V
-1,0
BOT
0,47.4397833333333
V
0,-1.20735168457031
V
-1,0
BOT
0,47.44645
V
0,-1.20782852172852
V
-1,0
BOT
0,47.4531166666667
V
0,-1.20782852172852
V
-1,0
BOT
0,47.4597833333333
V
0,-1.20782852172852
V
-1,0
BOT
0,47.46645
V
0,-1.20782852172852
V
-1,0
BOT
0,47.4731166666667
V
0,-1.20782852172852
V
-1,0
BOT
0,47.4797833333333
V
0,-1.20782852172852
V
-1,0
BOT
0,47.48645
V
0,-1.20735168457031
V
-1,0
BOT
0,47.4931166666667
V
0,-1.20687484741211
V
-1,0
BOT
0,47.4997833333333
V
0,-1.2054443359375
V
-1,0
BOT
0,47.50645
V
0,-1.20353698730469
V
-1,0
BOT
0,47.5131166666667
V
0,-1.20162963867187
V
-1,0
BOT
0,47.5197833333333
V
0,-1.19924545288086
V
-1,0
BOT
0,47.52645
V
0,-1.19733810424805
V
-1,0
BOT
0,47.5331166666667
V
0,-1.19590759277344
V
-1,0
BOT
0,47.5397833333333
V
0,-1.19447708129883
V
-1,0
BOT
0,47.54645
V
0,-1.19256973266602
V
-1,0
BOT
0,47.5531166666667
V
0,-1.1906623840332
V
-1,0
BOT
0,47.5597833333333
V
0,-1.18875503540039
V
-1,0
BOT
0,47.56645
V
0,-1.18637084960937
V
-1,0
BOT
0,47.5731166666667
V
0,-1.18398666381836
V
-1,0
BOT
0,47.5797833333333
V
0,-1.18112564086914
V
-1,0
BOT
0,47.58645
V
0,-1.17826461791992
V
-1,0
BOT
0,47.5931166666667
V
0,-1.1754035949707
V
-1,0
BOT
0,47.5997833333333
V
0,-1.17254257202148
V
-1,0
BOT
0,47.60645
V
0,-1.17063522338867
V
-1,0
BOT
0,47.6131166666667
V
0,-1.16872787475586
V
-1,0
BOT
0,47.6197833333333
V
0,-1.16729736328125
V
-1,0
BOT
0,47.62645
V
0,-1.16634368896484
V
-1,0
BOT
0,47.6331166666667
V
0,-1.16586685180664
V
-1,0
BOT
0,47.6397833333333
V
0,-1.16586685180664
V
-1,0
BOT
0,47.64645
V
0,-1.16586685180664
V
-1,0
BOT
0,47.6531166666667
V
0,-1.16539001464844
V
-1,0
BOT
0,47.6597833333333
V
0,-1.16586685180664
V
-1,0
BOT
0,47.66645
V
0,-1.16634368896484
V
-1,0
BOT
0,47.6731166666667
V
0,-1.16634368896484
V
-1,0
BOT
0,47.6797833333333
V
0,-1.16634368896484
V
-1,0
BOT
0,47.68645
V
0,-1.16586685180664
V
-1,0
BOT
0,47.6931166666667
V
0,-1.16586685180664
V
-1,0
BOT
0,47.6997833333333
V
0,-1.16586685180664
V
-1,0
BOT
0,47.70645
V
0,-1.16586685180664
V
-1,0
BOT
0,47.7131166666667
V
0,-1.16586685180664
V
-1,0
BOT
0,47.7197833333333
V
0,-1.16586685180664
V
-1,0
BOT
0,47.72645
V
0,-1.16586685180664
V
-1,0
BOT
0,47.7331166666667
V
0,-1.16539001464844
V
-1,0
BOT
0,47.7397833333333
V
0,-1.16443634033203
V
-1,0
BOT
0,47.74645
V
0,-1.16395950317383
V
-1,0
BOT
0,47.7531166666667
V
0,-1.16348266601562
V
-1,0
BOT
0,47.7597833333333
V
0,-1.16252899169922
V
-1,0
BOT
0,47.76645
V
0,-1.16109848022461
V
-1,0
BOT
0,47.7731166666667
V
0,-1.15966796875
V
-1,0
BOT
0,47.7797833333333
V
0,-1.15776062011719
V
-1,0
BOT
0,47.78645
V
0,-1.15537643432617
V
-1,0
BOT
0,47.7931166666667
V
0,-1.15299224853516
V
-1,0
BOT
0,47.7997833333333
V
0,-1.15060806274414
V
-1,0
BOT
0,47.80645
V
0,-1.14774703979492
V
-1,0
BOT
0,47.8131166666667
V
0,-1.1448860168457
V
-1,0
BOT
0,47.8197833333333
V
0,-1.14202499389648
V
-1,0
BOT
0,47.82645
V
0,-1.13916397094727
V
-1,0
BOT
0,47.8331166666667
V
0,-1.13582611083984
V
-1,0
BOT
0,47.8397833333333
V
0,-1.13296508789062
V
-1,0
BOT
0,47.84645
V
0,-1.13058090209961
V
-1,0
BOT
0,47.8531166666667
V
0,-1.12819671630859
V
-1,0
BOT
0,47.8597833333333
V
0,-1.12628936767578
V
-1,0
BOT
0,47.86645
V
0,-1.12533569335937
V
-1,0
BOT
0,47.8731166666667
V
0,-1.12438201904297
V
-1,0
BOT
0,47.8797833333333
V
0,-1.12485885620117
V
-1,0
BOT
0,47.88645
V
0,-1.12581253051758
V
-1,0
BOT
0,47.8931166666667
V
0,-1.12724304199219
V
-1,0
BOT
0,47.8997833333333
V
0,-1.1296272277832
V
-1,0
BOT
0,47.90645
V
0,-1.13248825073242
V
-1,0
BOT
0,47.9131166666667
V
0,-1.13534927368164
V
-1,0
BOT
0,47.9197833333333
V
0,-1.13821029663086
V
-1,0
BOT
0,47.92645
V
0,-1.14011764526367
V
-1,0
BOT
0,47.9331166666667
V
0,-1.14250183105469
V
-1,0
BOT
0,47.9397833333333
V
0,-1.14583969116211
V
-1,0
BOT
0,47.94645
V
0,-1.14965438842773
V
-1,0
BOT
0,47.9531166666667
V
0,-1.15394592285156
V
-1,0
BOT
0,47.9597833333333
V
0,-1.15871429443359
V
-1,0
BOT
0,47.96645
V
0,-1.16348266601562
V
-1,0
BOT
0,47.9731166666667
V
0,-1.16872787475586
V
-1,0
BOT
0,47.9797833333333
V
0,-1.17301940917969
V
-1,0
BOT
0,47.98645
V
0,-1.17731094360352
V
-1,0
BOT
0,47.9931166666667
V
0,-1.18112564086914
V
-1,0
BOT
0,47.9997833333333
V
0,-1.18446350097656
V
-1,0
BOT
0,48.00645
V
0,-1.18780136108398
V
-1,0
BOT
0,48.0131166666667
V
0,-1.19161605834961
V
-1,0
BOT
0,48.0197833333333
V
0,-1.19495391845703
V
-1,0
BOT
0,48.02645
V
0,-1.19829177856445
V
-1,0
BOT
0,48.0331166666667
V
0,-1.20067596435547
V
-1,0
BOT
0,48.0397833333333
V
0,-1.20306015014648
V
-1,0
BOT
0,48.04645
V
0,-1.20401382446289
V
-1,0
BOT
0,48.0531166666667
V
0,-1.2049674987793
V
-1,0
BOT
0,48.0597833333333
V
0,-1.2054443359375
V
-1,0
BOT
0,48.06645
V
0,-1.2059211730957
V
-1,0
BOT
0,48.0731166666667
V
0,-1.20639801025391
V
-1,0
BOT
0,48.0797833333333
V
0,-1.20735168457031
V
-1,0
BOT
0,48.08645
V
0,-1.20830535888672
V
-1,0
BOT
0,48.0931166666667
V
0,-1.20830535888672
V
-1,0
BOT
0,48.0997833333333
V
0,-1.20878219604492
V
-1,0
BOT
0,48.10645
V
0,-1.20878219604492
V
-1,0
BOT
0,48.1131166666667
V
0,-1.20878219604492
V
-1,0
BOT
0,48.1197833333333
V
0,-1.20878219604492
V
-1,0
BOT
0,48.12645
V
0,-1.20925903320312
V
-1,0
BOT
0,48.1331166666667
V
0,-1.21068954467773
V
-1,0
BOT
0,48.1397833333333
V
0,-1.21164321899414
V
-1,0
BOT
0,48.14645
V
0,-1.21259689331055
V
-1,0
BOT
0,48.1531166666667
V
0,-1.21402740478516
V
-1,0
BOT
0,48.1597833333333
V
0,-1.21450424194336
V
-1,0
BOT
0,48.16645
V
0,-1.21450424194336
V
-1,0
BOT
0,48.1731166666667
V
0,-1.21402740478516
V
-1,0
BOT
0,48.1797833333333
V
0,-1.21402740478516
V
-1,0
BOT
0,48.18645
V
0,-1.21402740478516
V
-1,0
BOT
0,48.1931166666667
V
0,-1.21450424194336
V
-1,0
BOT
0,48.1997833333333
V
0,-1.21450424194336
V
-1,0
BOT
0,48.20645
V
0,-1.21450424194336
V
-1,0
BOT
0,48.2131166666667
V
0,-1.21402740478516
V
-1,0
BOT
0,48.2197833333333
V
0,-1.21355056762695
V
-1,0
BOT
0,48.22645
V
0,-1.21212005615234
V
-1,0
BOT
0,48.2331166666667
V
0,-1.21021270751953
V
-1,0
BOT
0,48.2397833333333
V
0,-1.20830535888672
V
-1,0
BOT
0,48.24645
V
0,-1.20639801025391
V
-1,0
BOT
0,48.2531166666667
V
0,-1.20449066162109
V
-1,0
BOT
0,48.2597833333333
V
0,-1.20306015014648
V
-1,0
BOT
0,48.26645
V
0,-1.20115280151367
V
-1,0
BOT
0,48.2731166666667
V
0,-1.19924545288086
V
-1,0
BOT
0,48.2797833333333
V
0,-1.19781494140625
V
-1,0
BOT
0,48.28645
V
0,-1.19590759277344
V
-1,0
BOT
0,48.2931166666667
V
0,-1.19400024414062
V
-1,0
BOT
0,48.2997833333333
V
0,-1.19161605834961
V
-1,0
BOT
0,48.30645
V
0,-1.18875503540039
V
-1,0
BOT
0,48.3131166666667
V
0,-1.18589401245117
V
-1,0
BOT
0,48.3197833333333
V
0,-1.18255615234375
V
-1,0
BOT
0,48.32645
V
0,-1.17921829223633
V
-1,0
BOT
0,48.3331166666667
V
0,-1.17588043212891
V
-1,0
BOT
0,48.3397833333333
V
0,-1.17301940917969
V
-1,0
BOT
0,48.34645
V
0,-1.16968154907227
V
-1,0
BOT
0,48.3531166666667
V
0,-1.16729736328125
V
-1,0
BOT
0,48.3597833333333
V
0,-1.16491317749023
V
-1,0
BOT
0,48.36645
V
0,-1.16300582885742
V
-1,0
BOT
0,48.3731166666667
V
0,-1.16157531738281
V
-1,0
BOT
0,48.3797833333333
V
0,-1.1601448059082
V
-1,0
BOT
0,48.38645
V
0,-1.15871429443359
V
-1,0
BOT
0,48.3931166666667
V
0,-1.15728378295898
V
-1,0
BOT
0,48.3997833333333
V
0,-1.15680694580078
V
-1,0
BOT
0,48.40645
V
0,-1.15585327148437
V
-1,0
BOT
0,48.4131166666667
V
0,-1.15489959716797
V
-1,0
BOT
0,48.4197833333333
V
0,-1.15442276000977
V
-1,0
BOT
0,48.42645
V
0,-1.15489959716797
V
-1,0
BOT
0,48.4331166666667
V
0,-1.15537643432617
V
-1,0
BOT
0,48.4397833333333
V
0,-1.15537643432617
V
-1,0
BOT
0,48.44645
V
0,-1.15537643432617
V
-1,0
BOT
0,48.4531166666667
V
0,-1.15442276000977
V
-1,0
BOT
0,48.4597833333333
V
0,-1.15251541137695
V
-1,0
BOT
0,48.46645
V
0,-1.14917755126953
V
-1,0
BOT
0,48.4731166666667
V
0,-1.14297866821289
V
-1,0
BOT
0,48.4797833333333
V
0,-1.13344192504883
V
-1,0
BOT
0,48.48645
V
0,-1.12104415893555
V
-1,0
BOT
0,48.4931166666667
V
0,-1.10435485839844
V
-1,0
BOT
0,48.4997833333333
V
0,-1.0833740234375
V
-1,0
BOT
0,48.50645
V
0,-1.05810165405273
V
-1,0
BOT
0,48.5131166666667
V
0,-1.02710723876953
V
-1,0
BOT
0,48.5197833333333
V
0,-0.990867614746094
V
-1,0
BOT
0,48.52645
V
0,-0.948429107666016
V
-1,0
BOT
0,48.5331166666667
V
0,-0.9002685546875
V
-1,0
BOT
0,48.5397833333333
V
0,-0.844955444335938
V
-1,0
BOT
0,48.54645
V
0,-0.782966613769531
V
-1,0
BOT
0,48.5531166666667
V
0,-0.715732574462891
V
-1,0
BOT
0,48.5597833333333
V
0,-0.643730163574219
V
-1,0
BOT
0,48.56645
V
0,-0.567913055419922
V
-1,0
BOT
0,48.5731166666667
V
0,-0.489711761474609
V
-1,0
BOT
0,48.5797833333333
V
0,-0.411510467529297
V
-1,0
BOT
0,48.58645
V
0,-0.334739685058594
V
-1,0
BOT
0,48.5931166666667
V
0,-0.261306762695312
V
-1,0
BOT
0,48.5997833333333
V
0,-0.193595886230469
V
-1,0
BOT
0,48.60645
V
0,-0.133991241455078
V
-1,0
BOT
0,48.6131166666667
V
0,-0.0848770141601563
V
-1,0
BOT
0,48.6197833333333
V
0,-0.0472068786621094
V
-1,0
BOT
0,48.62645
V
0,-0.0224113464355469
V
-1,0
BOT
0,48.6331166666667
V
0,-0.011444091796875
V
-1,0
BOT
0,48.6397833333333
V
0,-0.0143051147460937
V
-1,0
BOT
0,48.64645
V
0,-0.0309944152832031
V
-1,0
BOT
0,48.6531166666667
V
0,-0.0605583190917969
V
-1,0
BOT
0,48.6597833333333
V
0,-0.102519989013672
V
-1,0
BOT
0,48.66645
V
0,-0.154495239257812
V
-1,0
BOT
0,48.6731166666667
V
0,-0.216484069824219
V
-1,0
BOT
0,48.6797833333333
V
0,-0.285625457763672
V
-1,0
BOT
0,48.68645
V
0,-0.360012054443359
V
-1,0
BOT
0,48.6931166666667
V
0,-0.436782836914063
V
-1,0
BOT
0,48.6997833333333
V
0,-0.514030456542969
V
-1,0
BOT
0,48.70645
V
0,-0.589847564697266
V
-1,0
BOT
0,48.7131166666667
V
0,-0.662803649902344
V
-1,0
BOT
0,48.7197833333333
V
0,-0.731468200683594
V
-1,0
BOT
0,48.72645
V
0,-0.795364379882813
V
-1,0
BOT
0,48.7331166666667
V
0,-0.854015350341797
V
-1,0
BOT
0,48.7397833333333
V
0,-0.906944274902344
V
-1,0
BOT
0,48.74645
V
0,-0.95367431640625
V
-1,0
BOT
0,48.7531166666667
V
0,-0.995159149169922
V
-1,0
BOT
0,48.7597833333333
V
0,-1.03092193603516
V
-1,0
BOT
0,48.76645
V
0,-1.06191635131836
V
-1,0
BOT
0,48.7731166666667
V
0,-1.08766555786133
V
-1,0
BOT
0,48.7797833333333
V
0,-1.10864639282227
V
-1,0
BOT
0,48.78645
V
0,-1.12581253051758
V
-1,0
BOT
0,48.7931166666667
V
0,-1.13964080810547
V
-1,0
BOT
0,48.7997833333333
V
0,-1.15060806274414
V
-1,0
BOT
0,48.80645
V
0,-1.1591911315918
V
-1,0
BOT
0,48.8131166666667
V
0,-1.16634368896484
V
-1,0
BOT
0,48.8197833333333
V
0,-1.17158889770508
V
-1,0
BOT
0,48.82645
V
0,-1.17635726928711
V
-1,0
BOT
0,48.8331166666667
V
0,-1.18017196655273
V
-1,0
BOT
0,48.8397833333333
V
0,-1.18303298950195
V
-1,0
BOT
0,48.84645
V
0,-1.18446350097656
V
-1,0
BOT
0,48.8531166666667
V
0,-1.18541717529297
V
-1,0
BOT
0,48.8597833333333
V
0,-1.18589401245117
V
-1,0
BOT
0,48.86645
V
0,-1.18637084960937
V
-1,0
BOT
0,48.8731166666667
V
0,-1.18589401245117
V
-1,0
BOT
0,48.8797833333333
V
0,-1.18494033813477
V
-1,0
BOT
0,48.88645
V
0,-1.18446350097656
V
-1,0
BOT
0,48.8931166666667
V
0,-1.18398666381836
V
-1,0
BOT
0,48.8997833333333
V
0,-1.18303298950195
V
-1,0
BOT
0,48.90645
V
0,-1.18207931518555
V
-1,0
BOT
0,48.9131166666667
V
0,-1.18064880371094
V
-1,0
BOT
0,48.9197833333333
V
0,-1.17874145507812
V
-1,0
BOT
0,48.92645
V
0,-1.17683410644531
V
-1,0
BOT
0,48.9331166666667
V
0,-1.1749267578125
V
-1,0
BOT
0,48.9397833333333
V
0,-1.17254257202148
V
-1,0
BOT
0,48.94645
V
0,-1.17015838623047
V
-1,0
BOT
0,48.9531166666667
V
0,-1.16825103759766
V
-1,0
BOT
0,48.9597833333333
V
0,-1.16634368896484
V
-1,0
BOT
0,48.96645
V
0,-1.16348266601562
V
-1,0
BOT
0,48.9731166666667
V
0,-1.1601448059082
V
-1,0
BOT
0,48.9797833333333
V
0,-1.15680694580078
V
-1,0
BOT
0,48.98645
V
0,-1.15394592285156
V
-1,0
BOT
0,48.9931166666667
V
0,-1.15108489990234
V
-1,0
BOT
0,48.9997833333333
V
0,-1.14822387695312
V
-1,0
BOT
0,49.00645
V
0,-1.14631652832031
V
-1,0
BOT
0,49.0131166666667
V
0,-1.1444091796875
V
-1,0
BOT
0,49.0197833333333
V
0,-1.14202499389648
V
-1,0
BOT
0,49.02645
V
0,-1.13916397094727
V
-1,0
BOT
0,49.0331166666667
V
0,-1.13534927368164
V
-1,0
BOT
0,49.0397833333333
V
0,-1.13105773925781
V
-1,0
BOT
0,49.04645
V
0,-1.12676620483398
V
-1,0
BOT
0,49.0531166666667
V
0,-1.12104415893555
V
-1,0
BOT
0,49.0597833333333
V
0,-1.11532211303711
V
-1,0
BOT
0,49.06645
V
0,-1.10816955566406
V
-1,0
BOT
0,49.0731166666667
V
0,-1.10101699829102
V
-1,0
BOT
0,49.0797833333333
V
0,-1.09243392944336
V
-1,0
BOT
0,49.08645
V
0,-1.0833740234375
V
-1,0
BOT
0,49.0931166666667
V
0,-1.07383728027344
V
-1,0
BOT
0,49.0997833333333
V
0,-1.06382369995117
V
-1,0
BOT
0,49.10645
V
0,-1.0533332824707
V
-1,0
BOT
0,49.1131166666667
V
0,-1.04236602783203
V
-1,0
BOT
0,49.1197833333333
V
0,-1.03092193603516
V
-1,0
BOT
0,49.12645
V
0,-1.01947784423828
V
-1,0
BOT
0,49.1331166666667
V
0,-1.00803375244141
V
-1,0
BOT
0,49.1397833333333
V
0,-0.996589660644531
V
-1,0
BOT
0,49.14645
V
0,-0.985622406005859
V
-1,0
BOT
0,49.1531166666667
V
0,-0.975131988525391
V
-1,0
BOT
0,49.1597833333333
V
0,-0.965595245361328
V
-1,0
BOT
0,49.16645
V
0,-0.957489013671875
V
-1,0
BOT
0,49.1731166666667
V
0,-0.950813293457031
V
-1,0
BOT
0,49.1797833333333
V
0,-0.945091247558594
V
-1,0
BOT
0,49.18645
V
0,-0.940799713134766
V
-1,0
BOT
0,49.1931166666667
V
0,-0.937938690185547
V
-1,0
BOT
0,49.1997833333333
V
0,-0.936985015869141
V
-1,0
BOT
0,49.20645
V
0,-0.936508178710938
V
-1,0
BOT
0,49.2131166666667
V
0,-0.937938690185547
V
-1,0
BOT
0,49.2197833333333
V
0,-0.940322875976563
V
-1,0
BOT
0,49.22645
V
0,-0.944614410400391
V
-1,0
BOT
0,49.2331166666667
V
0,-0.949859619140625
V
-1,0
BOT
0,49.2397833333333
V
0,-0.956535339355469
V
-1,0
BOT
0,49.24645
V
0,-0.963211059570313
V
-1,0
BOT
0,49.2531166666667
V
0,-0.970840454101563
V
-1,0
BOT
0,49.2597833333333
V
0,-0.978946685791016
V
-1,0
BOT
0,49.26645
V
0,-0.988006591796875
V
-1,0
BOT
0,49.2731166666667
V
0,-0.997066497802734
V
-1,0
BOT
0,49.2797833333333
V
0,-1.00612640380859
V
-1,0
BOT
0,49.28645
V
0,-1.01566314697266
V
-1,0
BOT
0,49.2931166666667
V
0,-1.02472305297852
V
-1,0
BOT
0,49.2997833333333
V
0,-1.03330612182617
V
-1,0
BOT
0,49.30645
V
0,-1.04093551635742
V
-1,0
BOT
0,49.3131166666667
V
0,-1.04808807373047
V
-1,0
BOT
0,49.3197833333333
V
0,-1.05524063110352
V
-1,0
BOT
0,49.32645
V
0,-1.06191635131836
V
-1,0
BOT
0,49.3331166666667
V
0,-1.06906890869141
V
-1,0
BOT
0,49.3397833333333
V
0,-1.07574462890625
V
-1,0
BOT
0,49.34645
V
0,-1.08242034912109
V
-1,0
BOT
0,49.3531166666667
V
0,-1.08766555786133
V
-1,0
BOT
0,49.3597833333333
V
0,-1.09243392944336
V
-1,0
BOT
0,49.36645
V
0,-1.09672546386719
V
-1,0
BOT
0,49.3731166666667
V
0,-1.10101699829102
V
-1,0
BOT
0,49.3797833333333
V
0,-1.10483169555664
V
-1,0
BOT
0,49.38645
V
0,-1.10864639282227
V
-1,0
BOT
0,49.3931166666667
V
0,-1.11293792724609
V
-1,0
BOT
0,49.3997833333333
V
0,-1.11675262451172
V
-1,0
BOT
0,49.40645
V
0,-1.12009048461914
V
-1,0
BOT
0,49.4131166666667
V
0,-1.12295150756836
V
-1,0
BOT
0,49.4197833333333
V
0,-1.12533569335937
V
-1,0
BOT
0,49.42645
V
0,-1.12771987915039
V
-1,0
BOT
0,49.4331166666667
V
0,-1.13010406494141
V
-1,0
BOT
0,49.4397833333333
V
0,-1.13248825073242
V
-1,0
BOT
0,49.44645
V
0,-1.13487243652344
V
-1,0
BOT
0,49.4531166666667
V
0,-1.13725662231445
V
-1,0
BOT
0,49.4597833333333
V
0,-1.13964080810547
V
-1,0
BOT
0,49.46645
V
0,-1.14154815673828
V
-1,0
BOT
0,49.4731166666667
V
0,-1.14250183105469
V
-1,0
BOT
0,49.4797833333333
V
0,-1.14297866821289
V
-1,0
BOT
0,49.48645
V
0,-1.14297866821289
V
-1,0
BOT
0,49.4931166666667
V
0,-1.14345550537109
V
-1,0
BOT
0,49.4997833333333
V
0,-1.1444091796875
V
-1,0
BOT
0,49.50645
V
0,-1.14583969116211
V
-1,0
BOT
0,49.5131166666667
V
0,-1.14727020263672
V
-1,0
BOT
0,49.5197833333333
V
0,-1.14870071411133
V
-1,0
BOT
0,49.52645
V
0,-1.14917755126953
V
-1,0
BOT
0,49.5331166666667
V
0,-1.14965438842773
V
-1,0
BOT
0,49.5397833333333
V
0,-1.14917755126953
V
-1,0
BOT
0,49.54645
V
0,-1.14917755126953
V
-1,0
BOT
0,49.5531166666667
V
0,-1.14870071411133
V
-1,0
BOT
0,49.5597833333333
V
0,-1.14870071411133
V
-1,0
BOT
0,49.56645
V
0,-1.14917755126953
V
-1,0
BOT
0,49.5731166666667
V
0,-1.14917755126953
V
-1,0
BOT
0,49.5797833333333
V
0,-1.14917755126953
V
-1,0
BOT
0,49.58645
V
0,-1.14917755126953
V
-1,0
BOT
0,49.5931166666667
V
0,-1.14965438842773
V
-1,0
BOT
0,49.5997833333333
V
0,-1.15013122558594
V
-1,0
BOT
0,49.60645
V
0,-1.15108489990234
V
-1,0
BOT
0,49.6131166666667
V
0,-1.15203857421875
V
-1,0
BOT
0,49.6197833333333
V
0,-1.15346908569336
V
-1,0
BOT
0,49.62645
V
0,-1.15442276000977
V
-1,0
BOT
0,49.6331166666667
V
0,-1.15537643432617
V
-1,0
BOT
0,49.6397833333333
V
0,-1.15585327148437
V
-1,0
BOT
0,49.64645
V
0,-1.15680694580078
V
-1,0
BOT
0,49.6531166666667
V
0,-1.15728378295898
V
-1,0
BOT
0,49.6597833333333
V
0,-1.15823745727539
V
-1,0
BOT
0,49.66645
V
0,-1.15871429443359
V
-1,0
BOT
0,49.6731166666667
V
0,-1.15966796875
V
-1,0
BOT
0,49.6797833333333
V
0,-1.1601448059082
V
-1,0
BOT
0,49.68645
V
0,-1.16062164306641
V
-1,0
BOT
0,49.6931166666667
V
0,-1.16062164306641
V
-1,0
BOT
0,49.6997833333333
V
0,-1.15966796875
V
-1,0
BOT
0,49.70645
V
0,-1.15871429443359
V
-1,0
BOT
0,49.7131166666667
V
0,-1.15728378295898
V
-1,0
BOT
0,49.7197833333333
V
0,-1.15585327148437
V
-1,0
BOT
0,49.72645
V
0,-1.15442276000977
V
-1,0
BOT
0,49.7331166666667
V
0,-1.15299224853516
V
-1,0
BOT
0,49.7397833333333
V
0,-1.15156173706055
V
-1,0
BOT
0,49.74645
V
0,-1.15013122558594
V
-1,0
BOT
0,49.7531166666667
V
0,-1.14870071411133
V
-1,0
BOT
0,49.7597833333333
V
0,-1.14679336547852
V
-1,0
BOT
0,49.76645
V
0,-1.1444091796875
V
-1,0
BOT
0,49.7731166666667
V
0,-1.14154815673828
V
-1,0
BOT
0,49.7797833333333
V
0,-1.13868713378906
V
-1,0
BOT
0,49.78645
V
0,-1.13677978515625
V
-1,0
BOT
0,49.7931166666667
V
0,-1.13487243652344
V
-1,0
BOT
0,49.7997833333333
V
0,-1.13296508789062
V
-1,0
BOT
0,49.80645
V
0,-1.13153457641602
V
-1,0
BOT
0,49.8131166666667
V
0,-1.13010406494141
V
-1,0
BOT
0,49.8197833333333
V
0,-1.129150390625
V
-1,0
BOT
0,49.82645
V
0,-1.1286735534668
V
-1,0
BOT
0,49.8331166666667
V
0,-1.12819671630859
V
-1,0
BOT
0,49.8397833333333
V
0,-1.12771987915039
V
-1,0
BOT
0,49.84645
V
0,-1.12771987915039
V
-1,0
BOT
0,49.8531166666667
V
0,-1.12819671630859
V
-1,0
BOT
0,49.8597833333333
V
0,-1.129150390625
V
-1,0
BOT
0,49.86645
V
0,-1.13010406494141
V
-1,0
BOT
0,49.8731166666667
V
0,-1.13058090209961
V
-1,0
BOT
0,49.8797833333333
V
0,-1.13153457641602
V
-1,0
BOT
0,49.88645
V
0,-1.13296508789062
V
-1,0
BOT
0,49.8931166666667
V
0,-1.13487243652344
V
-1,0
BOT
0,49.8997833333333
V
0,-1.13630294799805
V
-1,0
BOT
0,49.90645
V
0,-1.13773345947266
V
-1,0
BOT
0,49.9131166666667
V
0,-1.14011764526367
V
-1,0
BOT
0,49.9197833333333
V
0,-1.14250183105469
V
-1,0
BOT
0,49.92645
V
0,-1.14536285400391
V
-1,0
BOT
0,49.9331166666667
V
0,-1.14774703979492
V
-1,0
BOT
0,49.9397833333333
V
0,-1.14965438842773
V
-1,0
BOT
0,49.94645
V
0,-1.15108489990234
V
-1,0
BOT
0,49.9531166666667
V
0,-1.15203857421875
V
-1,0
BOT
0,49.9597833333333
V
0,-1.15299224853516
V
-1,0
BOT
0,49.96645
V
0,-1.15394592285156
V
-1,0
BOT
0,49.9731166666667
V
0,-1.15489959716797
V
-1,0
BOT
0,49.9797833333333
V
0,-1.15537643432617
V
-1,0
BOT
0,49.98645
V
0,-1.15585327148437
V
-1,0
BOT
0,49.9931166666667
V
0,-1.15633010864258
V
-1,0
BOT
0,49.9997833333333
V
0,-1.15728378295898
V
-1,0
BOT
0,50.00645
V
0,-1.15823745727539
V
-1,0
BOT
0,50.0131166666667
V
0,-1.1591911315918
V
-1,0
BOT
0,50.0197833333333
V
0,-1.1601448059082
V
-1,0
BOT
0,50.02645
V
0,-1.16157531738281
V
-1,0
BOT
0,50.0331166666667
V
0,-1.16252899169922
V
-1,0
BOT
0,50.0397833333333
V
0,-1.16348266601562
V
-1,0
BOT
0,50.04645
V
0,-1.16348266601562
V
-1,0
BOT
0,50.0531166666667
V
0,-1.16395950317383
V
-1,0
BOT
0,50.0597833333333
V
0,-1.16443634033203
V
-1,0
BOT
0,50.06645
V
0,-1.16443634033203
V
-1,0
BOT
0,50.0731166666667
V
0,-1.16443634033203
V
-1,0
BOT
0,50.0797833333333
V
0,-1.16491317749023
V
-1,0
BOT
0,50.08645
V
0,-1.16491317749023
V
-1,0
BOT
0,50.0931166666667
V
0,-1.16491317749023
V
-1,0
BOT
0,50.0997833333333
V
0,-1.16491317749023
V
-1,0
BOT
0,50.10645
V
0,-1.16491317749023
V
-1,0
BOT
0,50.1131166666667
V
0,-1.16491317749023
V
-1,0
BOT
0,50.1197833333333
V
0,-1.16491317749023
V
-1,0
BOT
0,50.12645
V
0,-1.16491317749023
V
-1,0
BOT
0,50.1331166666667
V
0,-1.16491317749023
V
-1,0
BOT
0,50.1397833333333
V
0,-1.16491317749023
V
-1,0
BOT
0,50.14645
V
0,-1.16491317749023
V
-1,0
BOT
0,50.1531166666667
V
0,-1.16491317749023
V
-1,0
BOT
0,50.1597833333334
V
0,-1.16443634033203
V
-1,0
BOT
0,50.16645
V
0,-1.16443634033203
V
-1,0
BOT
0,50.1731166666667
V
0,-1.16491317749023
V
-1,0
BOT
0,50.1797833333333
V
0,-1.16539001464844
V
-1,0
BOT
0,50.18645
V
0,-1.16586685180664
V
-1,0
BOT
0,50.1931166666667
V
0,-1.16586685180664
V
-1,0
BOT
0,50.1997833333333
V
0,-1.16634368896484
V
-1,0
BOT
0,50.20645
V
0,-1.16586685180664
V
-1,0
BOT
0,50.2131166666667
V
0,-1.16491317749023
V
-1,0
BOT
0,50.2197833333334
V
0,-1.16395950317383
V
-1,0
BOT
0,50.22645
V
0,-1.16300582885742
V
-1,0
BOT
0,50.2331166666667
V
0,-1.16205215454102
V
-1,0
BOT
0,50.2397833333334
V
0,-1.1601448059082
V
-1,0
BOT
0,50.24645
V
0,-1.15871429443359
V
-1,0
BOT
0,50.2531166666667
V
0,-1.15680694580078
V
-1,0
BOT
0,50.2597833333333
V
0,-1.15489959716797
V
-1,0
BOT
0,50.26645
V
0,-1.15251541137695
V
-1,0
BOT
0,50.2731166666667
V
0,-1.14965438842773
V
-1,0
BOT
0,50.2797833333333
V
0,-1.14727020263672
V
-1,0
BOT
0,50.28645
V
0,-1.1448860168457
V
-1,0
BOT
0,50.2931166666667
V
0,-1.14297866821289
V
-1,0
BOT
0,50.2997833333333
V
0,-1.14107131958008
V
-1,0
BOT
0,50.30645
V
0,-1.13916397094727
V
-1,0
BOT
0,50.3131166666667
V
0,-1.13725662231445
V
-1,0
BOT
0,50.3197833333333
V
0,-1.13487243652344
V
-1,0
BOT
0,50.32645
V
0,-1.13248825073242
V
-1,0
BOT
0,50.3331166666667
V
0,-1.1296272277832
V
-1,0
BOT
0,50.3397833333333
V
0,-1.12724304199219
V
-1,0
BOT
0,50.34645
V
0,-1.12485885620117
V
-1,0
BOT
0,50.3531166666667
V
0,-1.12247467041016
V
-1,0
BOT
0,50.3597833333333
V
0,-1.12009048461914
V
-1,0
BOT
0,50.36645
V
0,-1.11818313598633
V
-1,0
BOT
0,50.3731166666667
V
0,-1.11675262451172
V
-1,0
BOT
0,50.3797833333333
V
0,-1.11532211303711
V
-1,0
BOT
0,50.38645
V
0,-1.1143684387207
V
-1,0
BOT
0,50.3931166666667
V
0,-1.1134147644043
V
-1,0
BOT
0,50.3997833333333
V
0,-1.11198425292969
V
-1,0
BOT
0,50.40645
V
0,-1.11103057861328
V
-1,0
BOT
0,50.4131166666667
V
0,-1.11007690429687
V
-1,0
BOT
0,50.4197833333333
V
0,-1.10912322998047
V
-1,0
BOT
0,50.42645
V
0,-1.10769271850586
V
-1,0
BOT
0,50.4331166666667
V
0,-1.10673904418945
V
-1,0
BOT
0,50.4397833333333
V
0,-1.10578536987305
V
-1,0
BOT
0,50.44645
V
0,-1.10530853271484
V
-1,0
BOT
0,50.4531166666667
V
0,-1.10530853271484
V
-1,0
BOT
0,50.4597833333333
V
0,-1.10530853271484
V
-1,0
BOT
0,50.46645
V
0,-1.10530853271484
V
-1,0
BOT
0,50.4731166666667
V
0,-1.10578536987305
V
-1,0
BOT
0,50.4797833333333
V
0,-1.10673904418945
V
-1,0
BOT
0,50.48645
V
0,-1.10721588134766
V
-1,0
BOT
0,50.4931166666667
V
0,-1.10816955566406
V
-1,0
BOT
0,50.4997833333333
V
0,-1.10864639282227
V
-1,0
BOT
0,50.50645
V
0,-1.10912322998047
V
-1,0
BOT
0,50.5131166666667
V
0,-1.10960006713867
V
-1,0
BOT
0,50.5197833333333
V
0,-1.11007690429687
V
-1,0
BOT
0,50.52645
V
0,-1.11055374145508
V
-1,0
BOT
0,50.5331166666667
V
0,-1.11055374145508
V
-1,0
BOT
0,50.5397833333334
V
0,-1.11103057861328
V
-1,0
BOT
0,50.54645
V
0,-1.11198425292969
V
-1,0
BOT
0,50.5531166666667
V
0,-1.11246109008789
V
-1,0
BOT
0,50.5597833333333
V
0,-1.1134147644043
V
-1,0
BOT
0,50.56645
V
0,-1.11484527587891
V
-1,0
BOT
0,50.5731166666667
V
0,-1.11627578735352
V
-1,0
BOT
0,50.5797833333333
V
0,-1.11770629882812
V
-1,0
BOT
0,50.58645
V
0,-1.11961364746094
V
-1,0
BOT
0,50.5931166666667
V
0,-1.12152099609375
V
-1,0
BOT
0,50.5997833333333
V
0,-1.12295150756836
V
-1,0
BOT
0,50.60645
V
0,-1.12485885620117
V
-1,0
BOT
0,50.6131166666667
V
0,-1.12724304199219
V
-1,0
BOT
0,50.6197833333334
V
0,-1.129150390625
V
-1,0
BOT
0,50.62645
V
0,-1.13105773925781
V
-1,0
BOT
0,50.6331166666667
V
0,-1.13296508789062
V
-1,0
BOT
0,50.6397833333334
V
0,-1.13439559936523
V
-1,0
BOT
0,50.64645
V
0,-1.13630294799805
V
-1,0
BOT
0,50.6531166666667
V
0,-1.13773345947266
V
-1,0
BOT
0,50.6597833333333
V
0,-1.13964080810547
V
-1,0
BOT
0,50.66645
V
0,-1.14107131958008
V
-1,0
BOT
0,50.6731166666667
V
0,-1.14297866821289
V
-1,0
BOT
0,50.6797833333333
V
0,-1.1444091796875
V
-1,0
BOT
0,50.68645
V
0,-1.14631652832031
V
-1,0
BOT
0,50.6931166666667
V
0,-1.14727020263672
V
-1,0
BOT
0,50.6997833333333
V
0,-1.14774703979492
V
-1,0
BOT
0,50.70645
V
0,-1.14774703979492
V
-1,0
BOT
0,50.7131166666667
V
0,-1.14774703979492
V
-1,0
BOT
0,50.7197833333333
V
0,-1.14774703979492
V
-1,0
BOT
0,50.72645
V
0,-1.14727020263672
V
-1,0
BOT
0,50.7331166666667
V
0,-1.14727020263672
V
-1,0
BOT
0,50.7397833333333
V
0,-1.14727020263672
V
-1,0
BOT
0,50.74645
V
0,-1.14774703979492
V
-1,0
BOT
0,50.7531166666667
V
0,-1.14774703979492
V
-1,0
BOT
0,50.7597833333333
V
0,-1.14774703979492
V
-1,0
BOT
0,50.76645
V
0,-1.14774703979492
V
-1,0
BOT
0,50.7731166666667
V
0,-1.14679336547852
V
-1,0
BOT
0,50.7797833333333
V
0,-1.14631652832031
V
-1,0
BOT
0,50.78645
V
0,-1.14536285400391
V
-1,0
BOT
0,50.7931166666667
V
0,-1.1448860168457
V
-1,0
BOT
0,50.7997833333333
V
0,-1.1444091796875
V
-1,0
BOT
0,50.80645
V
0,-1.1444091796875
V
-1,0
BOT
0,50.8131166666667
V
0,-1.1439323425293
V
-1,0
BOT
0,50.8197833333333
V
0,-1.1444091796875
V
-1,0
BOT
0,50.82645
V
0,-1.1444091796875
V
-1,0
BOT
0,50.8331166666667
V
0,-1.1448860168457
V
-1,0
BOT
0,50.8397833333333
V
0,-1.14536285400391
V
-1,0
BOT
0,50.84645
V
0,-1.14583969116211
V
-1,0
BOT
0,50.8531166666667
V
0,-1.14631652832031
V
-1,0
BOT
0,50.8597833333333
V
0,-1.14631652832031
V
-1,0
BOT
0,50.86645
V
0,-1.14583969116211
V
-1,0
BOT
0,50.8731166666667
V
0,-1.14536285400391
V
-1,0
BOT
0,50.8797833333333
V
0,-1.1448860168457
V
-1,0
BOT
0,50.88645
V
0,-1.1444091796875
V
-1,0
BOT
0,50.8931166666667
V
0,-1.1439323425293
V
-1,0
BOT
0,50.8997833333333
V
0,-1.1439323425293
V
-1,0
BOT
0,50.90645
V
0,-1.1439323425293
V
-1,0
BOT
0,50.9131166666667
V
0,-1.14345550537109
V
-1,0
BOT
0,50.9197833333333
V
0,-1.14345550537109
V
-1,0
BOT
0,50.92645
V
0,-1.14250183105469
V
-1,0
BOT
0,50.9331166666667
V
0,-1.14250183105469
V
-1,0
BOT
0,50.9397833333333
V
0,-1.14154815673828
V
-1,0
BOT
0,50.94645
V
0,-1.14107131958008
V
-1,0
BOT
0,50.9531166666667
V
0,-1.14011764526367
V
-1,0
BOT
0,50.9597833333333
V
0,-1.13916397094727
V
-1,0
BOT
0,50.96645
V
0,-1.13821029663086
V
-1,0
BOT
0,50.9731166666667
V
0,-1.13677978515625
V
-1,0
BOT
0,50.9797833333333
V
0,-1.13534927368164
V
-1,0
BOT
0,50.98645
V
0,-1.13391876220703
V
-1,0
BOT
0,50.9931166666667
V
0,-1.13201141357422
V
-1,0
BOT
0,50.9997833333334
V
0,-1.1296272277832
V
-1,0
BOT
0,51.00645
V
0,-1.12581253051758
V
-1,0
BOT
0,51.0131166666667
V
0,-1.12104415893555
V
-1,0
BOT
0,51.0197833333333
V
0,-1.1143684387207
V
-1,0
BOT
0,51.02645
V
0,-1.10626220703125
V
-1,0
BOT
0,51.0331166666667
V
0,-1.09624862670898
V
-1,0
BOT
0,51.0397833333334
V
0,-1.08480453491211
V
-1,0
BOT
0,51.04645
V
0,-1.07240676879883
V
-1,0
BOT
0,51.0531166666667
V
0,-1.05714797973633
V
-1,0
BOT
0,51.0597833333333
V
0,-1.03950500488281
V
-1,0
BOT
0,51.06645
V
0,-1.01900100708008
V
-1,0
BOT
0,51.0731166666667
V
0,-0.995159149169922
V
-1,0
BOT
0,51.0797833333333
V
0,-0.968456268310547
V
-1,0
BOT
0,51.08645
V
0,-0.939369201660156
V
-1,0
BOT
0,51.0931166666667
V
0,-0.90789794921875
V
-1,0
BOT
0,51.0997833333333
V
0,-0.874519348144531
V
-1,0
BOT
0,51.10645
V
0,-0.839710235595703
V
-1,0
BOT
0,51.1131166666667
V
0,-0.803470611572266
V
-1,0
BOT
0,51.1197833333333
V
0,-0.766754150390625
V
-1,0
BOT
0,51.12645
V
0,-0.730037689208984
V
-1,0
BOT
0,51.1331166666667
V
0,-0.694751739501953
V
-1,0
BOT
0,51.1397833333333
V
0,-0.661373138427734
V
-1,0
BOT
0,51.14645
V
0,-0.630378723144531
V
-1,0
BOT
0,51.1531166666667
V
0,-0.603675842285156
V
-1,0
BOT
0,51.1597833333333
V
0,-0.581741333007813
V
-1,0
BOT
0,51.16645
V
0,-0.564098358154297
V
-1,0
BOT
0,51.1731166666667
V
0,-0.551700592041016
V
-1,0
BOT
0,51.1797833333333
V
0,-0.544548034667969
V
-1,0
BOT
0,51.18645
V
0,-0.543594360351563
V
-1,0
BOT
0,51.1931166666667
V
0,-0.547885894775391
V
-1,0
BOT
0,51.1997833333333
V
0,-0.557899475097656
V
-1,0
BOT
0,51.20645
V
0,-0.573158264160156
V
-1,0
BOT
0,51.2131166666667
V
0,-0.593662261962891
V
-1,0
BOT
0,51.2197833333333
V
0,-0.617504119873047
V
-1,0
BOT
0,51.22645
V
0,-0.644683837890625
V
-1,0
BOT
0,51.2331166666667
V
0,-0.673770904541016
V
-1,0
BOT
0,51.2397833333333
V
0,-0.704765319824219
V
-1,0
BOT
0,51.24645
V
0,-0.737190246582031
V
-1,0
BOT
0,51.2531166666667
V
0,-0.770092010498047
V
-1,0
BOT
0,51.2597833333333
V
0,-0.802993774414063
V
-1,0
BOT
0,51.26645
V
0,-0.834465026855469
V
-1,0
BOT
0,51.2731166666667
V
0,-0.864982604980469
V
-1,0
BOT
0,51.2797833333333
V
0,-0.893592834472656
V
-1,0
BOT
0,51.28645
V
0,-0.919818878173828
V
-1,0
BOT
0,51.2931166666667
V
0,-0.943660736083984
V
-1,0
BOT
0,51.2997833333333
V
0,-0.965595245361328
V
-1,0
BOT
0,51.30645
V
0,-0.985145568847656
V
-1,0
BOT
0,51.3131166666667
V
0,-1.00278854370117
V
-1,0
BOT
0,51.3197833333333
V
0,-1.01757049560547
V
-1,0
BOT
0,51.32645
V
0,-1.02996826171875
V
-1,0
BOT
0,51.3331166666667
V
0,-1.03998184204102
V
-1,0
BOT
0,51.3397833333333
V
0,-1.04808807373047
V
-1,0
BOT
0,51.34645
V
0,-1.05428695678711
V
-1,0
BOT
0,51.3531166666667
V
0,-1.05857849121094
V
-1,0
BOT
0,51.3597833333333
V
0,-1.06239318847656
V
-1,0
BOT
0,51.36645
V
0,-1.06525421142578
V
-1,0
BOT
0,51.3731166666667
V
0,-1.0676383972168
V
-1,0
BOT
0,51.3797833333333
V
0,-1.06906890869141
V
-1,0
BOT
0,51.38645
V
0,-1.07002258300781
V
-1,0
BOT
0,51.3931166666667
V
0,-1.07049942016602
V
-1,0
BOT
0,51.3997833333333
V
0,-1.07049942016602
V
-1,0
BOT
0,51.40645
V
0,-1.07002258300781
V
-1,0
BOT
0,51.4131166666667
V
0,-1.06906890869141
V
-1,0
BOT
0,51.4197833333333
V
0,-1.068115234375
V
-1,0
BOT
0,51.42645
V
0,-1.06716156005859
V
-1,0
BOT
0,51.4331166666667
V
0,-1.06573104858398
V
-1,0
BOT
0,51.4397833333334
V
0,-1.06430053710937
V
-1,0
BOT
0,51.44645
V
0,-1.06191635131836
V
-1,0
BOT
0,51.4531166666667
V
0,-1.05953216552734
V
-1,0
BOT
0,51.4597833333333
V
0,-1.05714797973633
V
-1,0
BOT
0,51.46645
V
0,-1.05524063110352
V
-1,0
BOT
0,51.4731166666667
V
0,-1.0523796081543
V
-1,0
BOT
0,51.4797833333333
V
0,-1.04999542236328
V
-1,0
BOT
0,51.48645
V
0,-1.04713439941406
V
-1,0
BOT
0,51.4931166666667
V
0,-1.04427337646484
V
-1,0
BOT
0,51.4997833333333
V
0,-1.04045867919922
V
-1,0
BOT
0,51.50645
V
0,-1.03664398193359
V
-1,0
BOT
0,51.5131166666667
V
0,-1.03235244750977
V
-1,0
BOT
0,51.5197833333333
V
0,-1.02758407592773
V
-1,0
BOT
0,51.52645
V
0,-1.0228157043457
V
-1,0
BOT
0,51.5331166666667
V
0,-1.01804733276367
V
-1,0
BOT
0,51.5397833333333
V
0,-1.01327896118164
V
-1,0
BOT
0,51.54645
V
0,-1.00898742675781
V
-1,0
BOT
0,51.5531166666667
V
0,-1.00469589233398
V
-1,0
BOT
0,51.5597833333333
V
0,-1.00040435791016
V
-1,0
BOT
0,51.56645
V
0,-0.997543334960938
V
-1,0
BOT
0,51.5731166666667
V
0,-0.995159149169922
V
-1,0
BOT
0,51.5797833333333
V
0,-0.992774963378906
V
-1,0
BOT
0,51.58645
V
0,-0.991344451904297
V
-1,0
BOT
0,51.5931166666667
V
0,-0.990867614746094
V
-1,0
BOT
0,51.5997833333333
V
0,-0.990390777587891
V
-1,0
BOT
0,51.60645
V
0,-0.991344451904297
V
-1,0
BOT
0,51.6131166666667
V
0,-0.992298126220703
V
-1,0
BOT
0,51.6197833333333
V
0,-0.993728637695313
V
-1,0
BOT
0,51.62645
V
0,-0.995159149169922
V
-1,0
BOT
0,51.6331166666667
V
0,-0.997543334960938
V
-1,0
BOT
0,51.6397833333333
V
0,-0.99945068359375
V
-1,0
BOT
0,51.64645
V
0,-1.00183486938477
V
-1,0
BOT
0,51.6531166666667
V
0,-1.00374221801758
V
-1,0
BOT
0,51.6597833333333
V
0,-1.00564956665039
V
-1,0
BOT
0,51.66645
V
0,-1.0075569152832
V
-1,0
BOT
0,51.6731166666667
V
0,-1.00994110107422
V
-1,0
BOT
0,51.6797833333333
V
0,-1.01184844970703
V
-1,0
BOT
0,51.68645
V
0,-1.01327896118164
V
-1,0
BOT
0,51.6931166666667
V
0,-1.01518630981445
V
-1,0
BOT
0,51.6997833333333
V
0,-1.01757049560547
V
-1,0
BOT
0,51.70645
V
0,-1.01947784423828
V
-1,0
BOT
0,51.7131166666667
V
0,-1.02090835571289
V
-1,0
BOT
0,51.7197833333333
V
0,-1.0223388671875
V
-1,0
BOT
0,51.72645
V
0,-1.0228157043457
V
-1,0
BOT
0,51.7331166666667
V
0,-1.02424621582031
V
-1,0
BOT
0,51.7397833333333
V
0,-1.02567672729492
V
-1,0
BOT
0,51.74645
V
0,-1.02710723876953
V
-1,0
BOT
0,51.7531166666667
V
0,-1.02949142456055
V
-1,0
BOT
0,51.7597833333334
V
0,-1.03187561035156
V
-1,0
BOT
0,51.76645
V
0,-1.03425979614258
V
-1,0
BOT
0,51.7731166666667
V
0,-1.03664398193359
V
-1,0
BOT
0,51.7797833333333
V
0,-1.03902816772461
V
-1,0
BOT
0,51.78645
V
0,-1.04093551635742
V
-1,0
BOT
0,51.7931166666667
V
0,-1.04284286499023
V
-1,0
BOT
0,51.7997833333333
V
0,-1.04522705078125
V
-1,0
BOT
0,51.80645
V
0,-1.04856491088867
V
-1,0
BOT
0,51.8131166666667
V
0,-1.05190277099609
V
-1,0
BOT
0,51.8197833333334
V
0,-1.05476379394531
V
-1,0
BOT
0,51.82645
V
0,-1.05762481689453
V
-1,0
BOT
0,51.8331166666667
V
0,-1.06000900268555
V
-1,0
BOT
0,51.8397833333334
V
0,-1.06191635131836
V
-1,0
BOT
0,51.84645
V
0,-1.06287002563477
V
-1,0
BOT
0,51.8531166666667
V
0,-1.06382369995117
V
-1,0
BOT
0,51.8597833333334
V
0,-1.06430053710937
V
-1,0
BOT
0,51.86645
V
0,-1.06430053710937
V
-1,0
BOT
0,51.8731166666667
V
0,-1.06525421142578
V
-1,0
BOT
0,51.8797833333333
V
0,-1.06525421142578
V
-1,0
BOT
0,51.88645
V
0,-1.06573104858398
V
-1,0
BOT
0,51.8931166666667
V
0,-1.06573104858398
V
-1,0
BOT
0,51.8997833333333
V
0,-1.06573104858398
V
-1,0
BOT
0,51.90645
V
0,-1.06525421142578
V
-1,0
BOT
0,51.9131166666667
V
0,-1.06525421142578
V
-1,0
BOT
0,51.9197833333333
V
0,-1.06477737426758
V
-1,0
BOT
0,51.92645
V
0,-1.06430053710937
V
-1,0
BOT
0,51.9331166666667
V
0,-1.06334686279297
V
-1,0
BOT
0,51.9397833333333
V
0,-1.06239318847656
V
-1,0
BOT
0,51.94645
V
0,-1.06143951416016
V
-1,0
BOT
0,51.9531166666667
V
0,-1.06048583984375
V
-1,0
BOT
0,51.9597833333333
V
0,-1.05953216552734
V
-1,0
BOT
0,51.96645
V
0,-1.05905532836914
V
-1,0
BOT
0,51.9731166666667
V
0,-1.05810165405273
V
-1,0
BOT
0,51.9797833333333
V
0,-1.05667114257812
V
-1,0
BOT
0,51.98645
V
0,-1.05571746826172
V
-1,0
BOT
0,51.9931166666667
V
0,-1.05428695678711
V
-1,0
BOT
0,51.9997833333333
V
0,-1.0523796081543
V
-1,0
BOT
0,52.00645
V
0,-1.05094909667969
V
-1,0
BOT
0,52.0131166666667
V
0,-1.04999542236328
V
-1,0
BOT
0,52.0197833333333
V
0,-1.04904174804687
V
-1,0
BOT
0,52.02645
V
0,-1.04761123657227
V
-1,0
BOT
0,52.0331166666667
V
0,-1.04618072509766
V
-1,0
BOT
0,52.0397833333333
V
0,-1.04379653930664
V
-1,0
BOT
0,52.04645
V
0,-1.04141235351562
V
-1,0
BOT
0,52.0531166666667
V
0,-1.03902816772461
V
-1,0
BOT
0,52.0597833333333
V
0,-1.0371208190918
V
-1,0
BOT
0,52.06645
V
0,-1.03569030761719
V
-1,0
BOT
0,52.0731166666667
V
0,-1.03425979614258
V
-1,0
BOT
0,52.0797833333333
V
0,-1.03282928466797
V
-1,0
BOT
0,52.08645
V
0,-1.03044509887695
V
-1,0
BOT
0,52.0931166666667
V
0,-1.02806091308594
V
-1,0
BOT
0,52.0997833333333
V
0,-1.02519989013672
V
-1,0
BOT
0,52.10645
V
0,-1.0228157043457
V
-1,0
BOT
0,52.1131166666667
V
0,-1.0218620300293
V
-1,0
BOT
0,52.1197833333333
V
0,-1.02090835571289
V
-1,0
BOT
0,52.12645
V
0,-1.02090835571289
V
-1,0
BOT
0,52.1331166666667
V
0,-1.02090835571289
V
-1,0
BOT
0,52.1397833333334
V
0,-1.02138519287109
V
-1,0
BOT
0,52.14645
V
0,-1.0218620300293
V
-1,0
BOT
0,52.1531166666667
V
0,-1.0218620300293
V
-1,0
BOT
0,52.1597833333333
V
0,-1.0218620300293
V
-1,0
BOT
0,52.16645
V
0,-1.0223388671875
V
-1,0
BOT
0,52.1731166666667
V
0,-1.0228157043457
V
-1,0
BOT
0,52.1797833333334
V
0,-1.02329254150391
V
-1,0
BOT
0,52.18645
V
0,-1.02376937866211
V
-1,0
BOT
0,52.1931166666667
V
0,-1.02424621582031
V
-1,0
BOT
0,52.1997833333333
V
0,-1.02472305297852
V
-1,0
BOT
0,52.20645
V
0,-1.02472305297852
V
-1,0
BOT
0,52.2131166666667
V
0,-1.02424621582031
V
-1,0
BOT
0,52.2197833333334
V
0,-1.02424621582031
V
-1,0
BOT
0,52.22645
V
0,-1.02376937866211
V
-1,0
BOT
0,52.2331166666667
V
0,-1.02329254150391
V
-1,0
BOT
0,52.2397833333333
V
0,-1.0223388671875
V
-1,0
BOT
0,52.24645
V
0,-1.0218620300293
V
-1,0
BOT
0,52.2531166666667
V
0,-1.02090835571289
V
-1,0
BOT
0,52.2597833333334
V
0,-1.01995468139648
V
-1,0
BOT
0,52.26645
V
0,-1.01900100708008
V
-1,0
BOT
0,52.2731166666667
V
0,-1.01804733276367
V
-1,0
BOT
0,52.2797833333333
V
0,-1.01757049560547
V
-1,0
BOT
0,52.28645
V
0,-1.01661682128906
V
-1,0
BOT
0,52.2931166666667
V
0,-1.01518630981445
V
-1,0
BOT
0,52.2997833333333
V
0,-1.01375579833984
V
-1,0
BOT
0,52.30645
V
0,-1.01232528686523
V
-1,0
BOT
0,52.3131166666667
V
0,-1.01041793823242
V
-1,0
BOT
0,52.3197833333333
V
0,-1.00851058959961
V
-1,0
BOT
0,52.32645
V
0,-1.00612640380859
V
-1,0
BOT
0,52.3331166666667
V
0,-1.00374221801758
V
-1,0
BOT
0,52.3397833333333
V
0,-1.00135803222656
V
-1,0
BOT
0,52.34645
V
0,-0.998973846435547
V
-1,0
BOT
0,52.3531166666667
V
0,-0.996589660644531
V
-1,0
BOT
0,52.3597833333333
V
0,-0.994205474853516
V
-1,0
BOT
0,52.36645
V
0,-0.992298126220703
V
-1,0
BOT
0,52.3731166666667
V
0,-0.989437103271484
V
-1,0
BOT
0,52.3797833333333
V
0,-0.986576080322266
V
-1,0
BOT
0,52.38645
V
0,-0.983715057373047
V
-1,0
BOT
0,52.3931166666667
V
0,-0.980377197265625
V
-1,0
BOT
0,52.3997833333333
V
0,-0.977993011474609
V
-1,0
BOT
0,52.40645
V
0,-0.975608825683594
V
-1,0
BOT
0,52.4131166666667
V
0,-0.974178314208984
V
-1,0
BOT
0,52.4197833333333
V
0,-0.973224639892578
V
-1,0
BOT
0,52.42645
V
0,-0.973224639892578
V
-1,0
BOT
0,52.4331166666667
V
0,-0.974178314208984
V
-1,0
BOT
0,52.4397833333333
V
0,-0.974655151367188
V
-1,0
BOT
0,52.44645
V
0,-0.975608825683594
V
-1,0
BOT
0,52.4531166666667
V
0,-0.976085662841797
V
-1,0
BOT
0,52.4597833333333
V
0,-0.977039337158203
V
-1,0
BOT
0,52.46645
V
0,-0.977993011474609
V
-1,0
BOT
0,52.4731166666667
V
0,-0.978946685791016
V
-1,0
BOT
0,52.4797833333333
V
0,-0.980854034423828
V
-1,0
BOT
0,52.48645
V
0,-0.982761383056641
V
-1,0
BOT
0,52.4931166666667
V
0,-0.984668731689453
V
-1,0
BOT
0,52.4997833333333
V
0,-0.986099243164063
V
-1,0
BOT
0,52.50645
V
0,-0.987052917480469
V
-1,0
BOT
0,52.5131166666667
V
0,-0.988006591796875
V
-1,0
BOT
0,52.5197833333333
V
0,-0.988960266113281
V
-1,0
BOT
0,52.52645
V
0,-0.989913940429688
V
-1,0
BOT
0,52.5331166666667
V
0,-0.990867614746094
V
-1,0
BOT
0,52.5397833333333
V
0,-0.9918212890625
V
-1,0
BOT
0,52.54645
V
0,-0.992298126220703
V
-1,0
BOT
0,52.5531166666667
V
0,-0.992774963378906
V
-1,0
BOT
0,52.5597833333333
V
0,-0.993251800537109
V
-1,0
BOT
0,52.56645
V
0,-0.992774963378906
V
-1,0
BOT
0,52.5731166666667
V
0,-0.992298126220703
V
-1,0
BOT
0,52.5797833333333
V
0,-0.9918212890625
V
-1,0
BOT
0,52.58645
V
0,-0.991344451904297
V
-1,0
BOT
0,52.5931166666667
V
0,-0.989913940429688
V
-1,0
BOT
0,52.5997833333333
V
0,-0.988960266113281
V
-1,0
BOT
0,52.60645
V
0,-0.987529754638672
V
-1,0
BOT
0,52.6131166666667
V
0,-0.986576080322266
V
-1,0
BOT
0,52.6197833333333
V
0,-0.985622406005859
V
-1,0
BOT
0,52.62645
V
0,-0.984668731689453
V
-1,0
BOT
0,52.6331166666667
V
0,-0.983715057373047
V
-1,0
BOT
0,52.6397833333334
V
0,-0.982761383056641
V
-1,0
BOT
0,52.64645
V
0,-0.981330871582031
V
-1,0
BOT
0,52.6531166666667
V
0,-0.979900360107422
V
-1,0
BOT
0,52.6597833333334
V
0,-0.977993011474609
V
-1,0
BOT
0,52.66645
V
0,-0.975608825683594
V
-1,0
BOT
0,52.6731166666667
V
0,-0.972747802734375
V
-1,0
BOT
0,52.6797833333333
V
0,-0.969886779785156
V
-1,0
BOT
0,52.68645
V
0,-0.966548919677734
V
-1,0
BOT
0,52.6931166666667
V
0,-0.963211059570313
V
-1,0
BOT
0,52.6997833333333
V
0,-0.959396362304688
V
-1,0
BOT
0,52.70645
V
0,-0.954627990722656
V
-1,0
BOT
0,52.7131166666667
V
0,-0.949382781982422
V
-1,0
BOT
0,52.7197833333333
V
0,-0.943660736083984
V
-1,0
BOT
0,52.72645
V
0,-0.936985015869141
V
-1,0
BOT
0,52.7331166666667
V
0,-0.929355621337891
V
-1,0
BOT
0,52.7397833333333
V
0,-0.921249389648438
V
-1,0
BOT
0,52.74645
V
0,-0.912666320800781
V
-1,0
BOT
0,52.7531166666667
V
0,-0.903606414794922
V
-1,0
BOT
0,52.7597833333333
V
0,-0.894546508789063
V
-1,0
BOT
0,52.76645
V
0,-0.885963439941406
V
-1,0
BOT
0,52.7731166666667
V
0,-0.87738037109375
V
-1,0
BOT
0,52.7797833333333
V
0,-0.8697509765625
V
-1,0
BOT
0,52.78645
V
0,-0.862598419189453
V
-1,0
BOT
0,52.7931166666667
V
0,-0.856876373291016
V
-1,0
BOT
0,52.7997833333333
V
0,-0.853061676025391
V
-1,0
BOT
0,52.80645
V
0,-0.850200653076172
V
-1,0
BOT
0,52.8131166666667
V
0,-0.848770141601563
V
-1,0
BOT
0,52.8197833333333
V
0,-0.849246978759766
V
-1,0
BOT
0,52.82645
V
0,-0.851154327392578
V
-1,0
BOT
0,52.8331166666667
V
0,-0.8544921875
V
-1,0
BOT
0,52.8397833333333
V
0,-0.858783721923828
V
-1,0
BOT
0,52.84645
V
0,-0.864505767822266
V
-1,0
BOT
0,52.8531166666667
V
0,-0.870704650878906
V
-1,0
BOT
0,52.8597833333333
V
0,-0.876903533935547
V
-1,0
BOT
0,52.86645
V
0,-0.884056091308594
V
-1,0
BOT
0,52.8731166666667
V
0,-0.890731811523438
V
-1,0
BOT
0,52.8797833333333
V
0,-0.897407531738281
V
-1,0
BOT
0,52.88645
V
0,-0.903606414794922
V
-1,0
BOT
0,52.8931166666667
V
0,-0.908851623535156
V
-1,0
BOT
0,52.8997833333333
V
0,-0.914096832275391
V
-1,0
BOT
0,52.90645
V
0,-0.918865203857422
V
-1,0
BOT
0,52.9131166666667
V
0,-0.92315673828125
V
-1,0
BOT
0,52.9197833333333
V
0,-0.926017761230469
V
-1,0
BOT
0,52.92645
V
0,-0.928878784179688
V
-1,0
BOT
0,52.9331166666667
V
0,-0.931262969970703
V
-1,0
BOT
0,52.9397833333333
V
0,-0.933170318603516
V
-1,0
BOT
0,52.94645
V
0,-0.934123992919922
V
-1,0
BOT
0,52.9531166666667
V
0,-0.935077667236328
V
-1,0
BOT
0,52.9597833333333
V
0,-0.935077667236328
V
-1,0
BOT
0,52.96645
V
0,-0.935554504394531
V
-1,0
BOT
0,52.9731166666667
V
0,-0.936031341552734
V
-1,0
BOT
0,52.9797833333334
V
0,-0.936508178710938
V
-1,0
BOT
0,52.98645
V
0,-0.936508178710938
V
-1,0
BOT
0,52.9931166666667
V
0,-0.936031341552734
V
-1,0
BOT
0,52.9997833333333
V
0,-0.935554504394531
V
-1,0
BOT
0,53.00645
V
0,-0.935077667236328
V
-1,0
BOT
0,53.0131166666667
V
0,-0.934123992919922
V
-1,0
BOT
0,53.0197833333333
V
0,-0.933170318603516
V
-1,0
BOT
0,53.02645
V
0,-0.932216644287109
V
-1,0
BOT
0,53.0331166666667
V
0,-0.9307861328125
V
-1,0
BOT
0,53.0397833333334
V
0,-0.928878784179688
V
-1,0
BOT
0,53.04645
V
0,-0.926494598388672
V
-1,0
BOT
0,53.0531166666667
V
0,-0.923633575439453
V
-1,0
BOT
0,53.0597833333334
V
0,-0.920772552490234
V
-1,0
BOT
0,53.06645
V
0,-0.917434692382813
V
-1,0
BOT
0,53.0731166666667
V
0,-0.913143157958984
V
-1,0
BOT
0,53.0797833333333
V
0,-0.909328460693359
V
-1,0
BOT
0,53.08645
V
0,-0.905513763427734
V
-1,0
BOT
0,53.0931166666667
V
0,-0.900745391845703
V
-1,0
BOT
0,53.0997833333333
V
0,-0.895500183105469
V
-1,0
BOT
0,53.10645
V
0,-0.890254974365234
V
-1,0
BOT
0,53.1131166666667
V
0,-0.884532928466797
V
-1,0
BOT
0,53.1197833333333
V
0,-0.877857208251953
V
-1,0
BOT
0,53.12645
V
0,-0.870227813720703
V
-1,0
BOT
0,53.1331166666667
V
0,-0.861644744873047
V
-1,0
BOT
0,53.1397833333333
V
0,-0.853061676025391
V
-1,0
BOT
0,53.14645
V
0,-0.844478607177734
V
-1,0
BOT
0,53.1531166666667
V
0,-0.835895538330078
V
-1,0
BOT
0,53.1597833333333
V
0,-0.828266143798828
V
-1,0
BOT
0,53.16645
V
0,-0.821590423583984
V
-1,0
BOT
0,53.1731166666667
V
0,-0.815391540527344
V
-1,0
BOT
0,53.1797833333333
V
0,-0.811100006103516
V
-1,0
BOT
0,53.18645
V
0,-0.807762145996094
V
-1,0
BOT
0,53.1931166666667
V
0,-0.804901123046875
V
-1,0
BOT
0,53.1997833333333
V
0,-0.802993774414063
V
-1,0
BOT
0,53.20645
V
0,-0.801563262939453
V
-1,0
BOT
0,53.2131166666667
V
0,-0.80108642578125
V
-1,0
BOT
0,53.2197833333333
V
0,-0.800609588623047
V
-1,0
BOT
0,53.22645
V
0,-0.80108642578125
V
-1,0
BOT
0,53.2331166666667
V
0,-0.802516937255859
V
-1,0
BOT
0,53.2397833333333
V
0,-0.804424285888672
V
-1,0
BOT
0,53.24645
V
0,-0.806808471679688
V
-1,0
BOT
0,53.2531166666667
V
0,-0.809192657470703
V
-1,0
BOT
0,53.2597833333333
V
0,-0.812053680419922
V
-1,0
BOT
0,53.26645
V
0,-0.814914703369141
V
-1,0
BOT
0,53.2731166666667
V
0,-0.817775726318359
V
-1,0
BOT
0,53.2797833333333
V
0,-0.819683074951172
V
-1,0
BOT
0,53.28645
V
0,-0.821590423583984
V
-1,0
BOT
0,53.2931166666667
V
0,-0.823020935058594
V
-1,0
BOT
0,53.2997833333333
V
0,-0.823974609375
V
-1,0
BOT
0,53.30645
V
0,-0.824451446533203
V
-1,0
BOT
0,53.3131166666667
V
0,-0.824451446533203
V
-1,0
BOT
0,53.3197833333333
V
0,-0.824451446533203
V
-1,0
BOT
0,53.32645
V
0,-0.824451446533203
V
-1,0
BOT
0,53.3331166666667
V
0,-0.823974609375
V
-1,0
BOT
0,53.3397833333333
V
0,-0.823020935058594
V
-1,0
BOT
0,53.34645
V
0,-0.821590423583984
V
-1,0
BOT
0,53.3531166666667
V
0,-0.818729400634766
V
-1,0
BOT
0,53.3597833333334
V
0,-0.815391540527344
V
-1,0
BOT
0,53.36645
V
0,-0.811100006103516
V
-1,0
BOT
0,53.3731166666667
V
0,-0.805854797363281
V
-1,0
BOT
0,53.3797833333333
V
0,-0.800609588623047
V
-1,0
BOT
0,53.38645
V
0,-0.794887542724609
V
-1,0
BOT
0,53.3931166666667
V
0,-0.789642333984375
V
-1,0
BOT
0,53.3997833333333
V
0,-0.784397125244141
V
-1,0
BOT
0,53.40645
V
0,-0.779628753662109
V
-1,0
BOT
0,53.4131166666667
V
0,-0.774860382080078
V
-1,0
BOT
0,53.4197833333333
V
0,-0.771045684814453
V
-1,0
BOT
0,53.42645
V
0,-0.767230987548828
V
-1,0
BOT
0,53.4331166666667
V
0,-0.764369964599609
V
-1,0
BOT
0,53.4397833333334
V
0,-0.761985778808594
V
-1,0
BOT
0,53.44645
V
0,-0.760555267333984
V
-1,0
BOT
0,53.4531166666667
V
0,-0.760078430175781
V
-1,0
BOT
0,53.4597833333334
V
0,-0.759601593017578
V
-1,0
BOT
0,53.46645
V
0,-0.760078430175781
V
-1,0
BOT
0,53.4731166666667
V
0,-0.761032104492188
V
-1,0
BOT
0,53.4797833333333
V
0,-0.763416290283203
V
-1,0
BOT
0,53.48645
V
0,-0.765800476074219
V
-1,0
BOT
0,53.4931166666667
V
0,-0.769138336181641
V
-1,0
BOT
0,53.4997833333333
V
0,-0.772953033447266
V
-1,0
BOT
0,53.50645
V
0,-0.776767730712891
V
-1,0
BOT
0,53.5131166666667
V
0,-0.780582427978516
V
-1,0
BOT
0,53.5197833333333
V
0,-0.782966613769531
V
-1,0
BOT
0,53.52645
V
0,-0.784873962402344
V
-1,0
BOT
0,53.5331166666667
V
0,-0.78582763671875
V
-1,0
BOT
0,53.5397833333333
V
0,-0.786304473876953
V
-1,0
BOT
0,53.54645
V
0,-0.787258148193359
V
-1,0
BOT
0,53.5531166666667
V
0,-0.787258148193359
V
-1,0
BOT
0,53.5597833333333
V
0,-0.787734985351563
V
-1,0
BOT
0,53.56645
V
0,-0.788211822509766
V
-1,0
BOT
0,53.5731166666667
V
0,-0.788688659667969
V
-1,0
BOT
0,53.5797833333333
V
0,-0.789642333984375
V
-1,0
BOT
0,53.58645
V
0,-0.790596008300781
V
-1,0
BOT
0,53.5931166666667
V
0,-0.791072845458984
V
-1,0
BOT
0,53.5997833333333
V
0,-0.792503356933594
V
-1,0
BOT
0,53.60645
V
0,-0.79345703125
V
-1,0
BOT
0,53.6131166666667
V
0,-0.793933868408203
V
-1,0
BOT
0,53.6197833333333
V
0,-0.794410705566406
V
-1,0
BOT
0,53.62645
V
0,-0.794887542724609
V
-1,0
BOT
0,53.6331166666667
V
0,-0.794887542724609
V
-1,0
BOT
0,53.6397833333333
V
0,-0.794410705566406
V
-1,0
BOT
0,53.64645
V
0,-0.793933868408203
V
-1,0
BOT
0,53.6531166666667
V
0,-0.792980194091797
V
-1,0
BOT
0,53.6597833333333
V
0,-0.792026519775391
V
-1,0
BOT
0,53.66645
V
0,-0.790596008300781
V
-1,0
BOT
0,53.6731166666667
V
0,-0.789165496826172
V
-1,0
BOT
0,53.6797833333333
V
0,-0.788211822509766
V
-1,0
BOT
0,53.68645
V
0,-0.787258148193359
V
-1,0
BOT
0,53.6931166666667
V
0,-0.78582763671875
V
-1,0
BOT
0,53.6997833333333
V
0,-0.784873962402344
V
-1,0
BOT
0,53.70645
V
0,-0.783443450927734
V
-1,0
BOT
0,53.7131166666667
V
0,-0.782012939453125
V
-1,0
BOT
0,53.7197833333333
V
0,-0.779628753662109
V
-1,0
BOT
0,53.72645
V
0,-0.777721405029297
V
-1,0
BOT
0,53.7331166666667
V
0,-0.775814056396484
V
-1,0
BOT
0,53.7397833333333
V
0,-0.773906707763672
V
-1,0
BOT
0,53.74645
V
0,-0.771999359130859
V
-1,0
BOT
0,53.7531166666667
V
0,-0.770092010498047
V
-1,0
BOT
0,53.7597833333333
V
0,-0.768661499023438
V
-1,0
BOT
0,53.76645
V
0,-0.767707824707031
V
-1,0
BOT
0,53.7731166666667
V
0,-0.766277313232422
V
-1,0
BOT
0,53.7797833333333
V
0,-0.764846801757813
V
-1,0
BOT
0,53.78645
V
0,-0.762939453125
V
-1,0
BOT
0,53.7931166666667
V
0,-0.760078430175781
V
-1,0
BOT
0,53.7997833333333
V
0,-0.757217407226563
V
-1,0
BOT
0,53.80645
V
0,-0.753402709960938
V
-1,0
BOT
0,53.8131166666667
V
0,-0.748157501220703
V
-1,0
BOT
0,53.8197833333334
V
0,-0.742912292480469
V
-1,0
BOT
0,53.82645
V
0,-0.736236572265625
V
-1,0
BOT
0,53.8331166666667
V
0,-0.728607177734375
V
-1,0
BOT
0,53.8397833333333
V
0,-0.719547271728516
V
-1,0
BOT
0,53.84645
V
0,-0.708580017089844
V
-1,0
BOT
0,53.8531166666667
V
0,-0.696182250976563
V
-1,0
BOT
0,53.8597833333334
V
0,-0.681400299072266
V
-1,0
BOT
0,53.86645
V
0,-0.664234161376953
V
-1,0
BOT
0,53.8731166666667
V
0,-0.645637512207031
V
-1,0
BOT
0,53.8797833333333
V
0,-0.624656677246094
V
-1,0
BOT
0,53.88645
V
0,-0.602245330810547
V
-1,0
BOT
0,53.8931166666667
V
0,-0.577449798583984
V
-1,0
BOT
0,53.8997833333333
V
0,-0.552177429199219
V
-1,0
BOT
0,53.90645
V
0,-0.526905059814453
V
-1,0
BOT
0,53.9131166666667
V
0,-0.501632690429688
V
-1,0
BOT
0,53.9197833333333
V
0,-0.477313995361328
V
-1,0
BOT
0,53.92645
V
0,-0.453948974609375
V
-1,0
BOT
0,53.9331166666667
V
0,-0.432491302490234
V
-1,0
BOT
0,53.9397833333333
V
0,-0.413417816162109
V
-1,0
BOT
0,53.94645
V
0,-0.397682189941406
V
-1,0
BOT
0,53.9531166666667
V
0,-0.385284423828125
V
-1,0
BOT
0,53.9597833333333
V
0,-0.376224517822266
V
-1,0
BOT
0,53.96645
V
0,-0.370979309082031
V
-1,0
BOT
0,53.9731166666667
V
0,-0.369548797607422
V
-1,0
BOT
0,53.9797833333333
V
0,-0.372409820556641
V
-1,0
BOT
0,53.98645
V
0,-0.378131866455078
V
-1,0
BOT
0,53.9931166666667
V
0,-0.386714935302734
V
-1,0
BOT
0,53.9997833333333
V
0,-0.397682189941406
V
-1,0
BOT
0,54.00645
V
0,-0.411033630371094
V
-1,0
BOT
0,54.0131166666667
V
0,-0.425815582275391
V
-1,0
BOT
0,54.0197833333333
V
0,-0.441074371337891
V
-1,0
BOT
0,54.02645
V
0,-0.456809997558594
V
-1,0
BOT
0,54.0331166666667
V
0,-0.472068786621094
V
-1,0
BOT
0,54.0397833333333
V
0,-0.486850738525391
V
-1,0
BOT
0,54.04645
V
0,-0.501155853271484
V
-1,0
BOT
0,54.0531166666667
V
0,-0.514507293701172
V
-1,0
BOT
0,54.0597833333333
V
0,-0.52642822265625
V
-1,0
BOT
0,54.06645
V
0,-0.536918640136719
V
-1,0
BOT
0,54.0731166666667
V
0,-0.545501708984375
V
-1,0
BOT
0,54.0797833333333
V
0,-0.552654266357422
V
-1,0
BOT
0,54.08645
V
0,-0.558853149414063
V
-1,0
BOT
0,54.0931166666667
V
0,-0.5645751953125
V
-1,0
BOT
0,54.0997833333333
V
0,-0.568866729736328
V
-1,0
BOT
0,54.10645
V
0,-0.572681427001953
V
-1,0
BOT
0,54.1131166666667
V
0,-0.575542449951172
V
-1,0
BOT
0,54.1197833333333
V
0,-0.577449798583984
V
-1,0
BOT
0,54.12645
V
0,-0.579357147216797
V
-1,0
BOT
0,54.1331166666667
V
0,-0.580310821533203
V
-1,0
BOT
0,54.1397833333333
V
0,-0.580787658691406
V
-1,0
BOT
0,54.14645
V
0,-0.581264495849609
V
-1,0
BOT
0,54.1531166666667
V
0,-0.580787658691406
V
-1,0
BOT
0,54.1597833333333
V
0,-0.580310821533203
V
-1,0
BOT
0,54.16645
V
0,-0.579833984375
V
-1,0
BOT
0,54.1731166666667
V
0,-0.578880310058594
V
-1,0
BOT
0,54.1797833333333
V
0,-0.578403472900391
V
-1,0
BOT
0,54.18645
V
0,-0.578403472900391
V
-1,0
BOT
0,54.1931166666667
V
0,-0.578880310058594
V
-1,0
BOT
0,54.1997833333334
V
0,-0.579357147216797
V
-1,0
BOT
0,54.20645
V
0,-0.579357147216797
V
-1,0
BOT
0,54.2131166666667
V
0,-0.579357147216797
V
-1,0
BOT
0,54.2197833333333
V
0,-0.578880310058594
V
-1,0
BOT
0,54.22645
V
0,-0.578403472900391
V
-1,0
BOT
0,54.2331166666667
V
0,-0.578403472900391
V
-1,0
BOT
0,54.2397833333333
V
0,-0.577926635742188
V
-1,0
BOT
0,54.24645
V
0,-0.576972961425781
V
-1,0
BOT
0,54.2531166666667
V
0,-0.576496124267578
V
-1,0
BOT
0,54.2597833333334
V
0,-0.576019287109375
V
-1,0
BOT
0,54.26645
V
0,-0.575065612792969
V
-1,0
BOT
0,54.2731166666667
V
0,-0.574111938476563
V
-1,0
BOT
0,54.2797833333334
V
0,-0.573158264160156
V
-1,0
BOT
0,54.28645
V
0,-0.57220458984375
V
-1,0
BOT
0,54.2931166666667
V
0,-0.571727752685547
V
-1,0
BOT
0,54.2997833333333
V
0,-0.570774078369141
V
-1,0
BOT
0,54.30645
V
0,-0.570297241210938
V
-1,0
BOT
0,54.3131166666667
V
0,-0.570297241210938
V
-1,0
BOT
0,54.3197833333333
V
0,-0.570297241210938
V
-1,0
BOT
0,54.32645
V
0,-0.569820404052734
V
-1,0
BOT
0,54.3331166666667
V
0,-0.568866729736328
V
-1,0
BOT
0,54.3397833333333
V
0,-0.567436218261719
V
-1,0
BOT
0,54.34645
V
0,-0.566005706787109
V
-1,0
BOT
0,54.3531166666667
V
0,-0.5645751953125
V
-1,0
BOT
0,54.3597833333333
V
0,-0.562667846679688
V
-1,0
BOT
0,54.36645
V
0,-0.560760498046875
V
-1,0
BOT
0,54.3731166666667
V
0,-0.559329986572266
V
-1,0
BOT
0,54.3797833333333
V
0,-0.557422637939453
V
-1,0
BOT
0,54.38645
V
0,-0.555515289306641
V
-1,0
BOT
0,54.3931166666667
V
0,-0.553131103515625
V
-1,0
BOT
0,54.3997833333333
V
0,-0.550270080566406
V
-1,0
BOT
0,54.40645
V
0,-0.547409057617188
V
-1,0
BOT
0,54.4131166666667
V
0,-0.545024871826172
V
-1,0
BOT
0,54.4197833333333
V
0,-0.542163848876953
V
-1,0
BOT
0,54.42645
V
0,-0.539302825927734
V
-1,0
BOT
0,54.4331166666667
V
0,-0.536441802978516
V
-1,0
BOT
0,54.4397833333333
V
0,-0.533580780029297
V
-1,0
BOT
0,54.44645
V
0,-0.531196594238281
V
-1,0
BOT
0,54.4531166666667
V
0,-0.528335571289063
V
-1,0
BOT
0,54.4597833333333
V
0,-0.525474548339844
V
-1,0
BOT
0,54.46645
V
0,-0.522613525390625
V
-1,0
BOT
0,54.4731166666667
V
0,-0.519752502441406
V
-1,0
BOT
0,54.4797833333333
V
0,-0.516891479492188
V
-1,0
BOT
0,54.48645
V
0,-0.513553619384766
V
-1,0
BOT
0,54.4931166666667
V
0,-0.510215759277344
V
-1,0
BOT
0,54.4997833333333
V
0,-0.506877899169922
V
-1,0
BOT
0,54.50645
V
0,-0.5035400390625
V
-1,0
BOT
0,54.5131166666667
V
0,-0.500679016113281
V
-1,0
BOT
0,54.5197833333333
V
0,-0.498294830322266
V
-1,0
BOT
0,54.52645
V
0,-0.496387481689453
V
-1,0
BOT
0,54.5331166666667
V
0,-0.494956970214844
V
-1,0
BOT
0,54.5397833333333
V
0,-0.493049621582031
V
-1,0
BOT
0,54.54645
V
0,-0.490665435791016
V
-1,0
BOT
0,54.5531166666667
V
0,-0.48828125
V
-1,0
BOT
0,54.5597833333333
V
0,-0.485897064208984
V
-1,0
BOT
0,54.56645
V
0,-0.483036041259766
V
-1,0
BOT
0,54.5731166666667
V
0,-0.480175018310547
V
-1,0
BOT
0,54.5797833333334
V
0,-0.477790832519531
V
-1,0
BOT
0,54.58645
V
0,-0.475406646728516
V
-1,0
BOT
0,54.5931166666667
V
0,-0.473499298095703
V
-1,0
BOT
0,54.5997833333333
V
0,-0.471591949462891
V
-1,0
BOT
0,54.60645
V
0,-0.469684600830078
V
-1,0
BOT
0,54.6131166666667
V
0,-0.466823577880859
V
-1,0
BOT
0,54.6197833333333
V
0,-0.463962554931641
V
-1,0
BOT
0,54.62645
V
0,-0.461101531982422
V
-1,0
BOT
0,54.6331166666667
V
0,-0.457763671875
V
-1,0
[truncated: 150,449 more chars]
