# Supplementary material for: Traceability and Quality Control in Traditional Chinese Medicine: From Chemical Fingerprint to Two-Dimensional Barcode
Source: Evid Based Complement Alternat Med. 2015 May 18;2015:251304. doi: 10.1155/2015/251304 (PMC4451286; doi:10.1155/2015/251304)
Supplement: Supplementary file 1 — Supplementary Table S1: shows the main difference between the one dimension and two-dimensional code. Supplementary Table S2: shows a total of 53 types of one dimension codes and 14 types of two-dimensional codes tested in this study. [file 251304.f1.zip › file-s1/roucongrong.DIF]

TABLE
0,1
"HP ChemStation DIF Output"
VECTORS
0,2
""
TUPLES
0,9751   
""
DATA
0,0
""
-1,0
BOT
0,-0.0403333333333333
V
0,0.176906585693359
V
-1,0
BOT
0,-0.0336666666666667
V
0,0.179767608642578
V
-1,0
BOT
0,-0.027
V
0,0.178813934326172
V
-1,0
BOT
0,-0.0203333333333333
V
0,0.17547607421875
V
-1,0
BOT
0,-0.0136666666666667
V
0,0.171661376953125
V
-1,0
BOT
0,-0.007
V
0,0.167369842529297
V
-1,0
BOT
0,-0.000333333333333332
V
0,0.163555145263672
V
-1,0
BOT
0,0.00633333333333334
V
0,0.159740447998047
V
-1,0
BOT
0,0.013
V
0,0.155925750732422
V
-1,0
BOT
0,0.0196666666666667
V
0,0.150203704833984
V
-1,0
BOT
0,0.0263333333333333
V
0,0.139713287353516
V
-1,0
BOT
0,0.033
V
0,0.124931335449219
V
-1,0
BOT
0,0.0396666666666667
V
0,0.107765197753906
V
-1,0
BOT
0,0.0463333333333333
V
0,0.0910758972167969
V
-1,0
BOT
0,0.053
V
0,0.0753402709960938
V
-1,0
BOT
0,0.0596666666666667
V
0,0.0600814819335938
V
-1,0
BOT
0,0.0663333333333333
V
0,0.0462532043457031
V
-1,0
BOT
0,0.073
V
0,0.0333786010742187
V
-1,0
BOT
0,0.0796666666666667
V
0,0.019073486328125
V
-1,0
BOT
0,0.0863333333333333
V
0,0.0019073486328125
V
-1,0
BOT
0,0.093
V
0,-0.0195503234863281
V
-1,0
BOT
0,0.0996666666666667
V
0,-0.0433921813964844
V
-1,0
BOT
0,0.106333333333333
V
0,-0.0667572021484375
V
-1,0
BOT
0,0.113
V
0,-0.0863075256347656
V
-1,0
BOT
0,0.119666666666667
V
0,-0.102519989013672
V
-1,0
BOT
0,0.126333333333333
V
0,-0.118732452392578
V
-1,0
BOT
0,0.133
V
0,-0.131607055664062
V
-1,0
BOT
0,0.139666666666667
V
0,-0.141143798828125
V
-1,0
BOT
0,0.146333333333333
V
0,-0.147342681884766
V
-1,0
BOT
0,0.153
V
0,-0.153541564941406
V
-1,0
BOT
0,0.159666666666667
V
0,-0.158309936523437
V
-1,0
BOT
0,0.166333333333333
V
0,-0.157833099365234
V
-1,0
BOT
0,0.173
V
0,-0.154495239257812
V
-1,0
BOT
0,0.179666666666667
V
0,-0.149726867675781
V
-1,0
BOT
0,0.186333333333333
V
0,-0.14495849609375
V
-1,0
BOT
0,0.193
V
0,-0.136375427246094
V
-1,0
BOT
0,0.199666666666667
V
0,-0.124931335449219
V
-1,0
BOT
0,0.206333333333333
V
0,-0.110149383544922
V
-1,0
BOT
0,0.213
V
0,-0.0920295715332031
V
-1,0
BOT
0,0.219666666666667
V
0,-0.0729560852050781
V
-1,0
BOT
0,0.226333333333333
V
0,-0.0524520874023438
V
-1,0
BOT
0,0.233
V
0,-0.0319480895996094
V
-1,0
BOT
0,0.239666666666667
V
0,-0.0100135803222656
V
-1,0
BOT
0,0.246333333333333
V
0,0.0119209289550781
V
-1,0
BOT
0,0.253
V
0,0.0338554382324219
V
-1,0
BOT
0,0.259666666666667
V
0,0.0576972961425781
V
-1,0
BOT
0,0.266333333333333
V
0,0.0829696655273438
V
-1,0
BOT
0,0.273
V
0,0.110626220703125
V
-1,0
BOT
0,0.279666666666667
V
0,0.135421752929687
V
-1,0
BOT
0,0.286333333333333
V
0,0.156402587890625
V
-1,0
BOT
0,0.293
V
0,0.174045562744141
V
-1,0
BOT
0,0.299666666666667
V
0,0.191211700439453
V
-1,0
BOT
0,0.306333333333333
V
0,0.206947326660156
V
-1,0
BOT
0,0.313
V
0,0.223159790039062
V
-1,0
BOT
0,0.319666666666667
V
0,0.243186950683594
V
-1,0
BOT
0,0.326333333333333
V
0,0.281810760498047
V
-1,0
BOT
0,0.333
V
0,0.372409820556641
V
-1,0
BOT
0,0.339666666666667
V
0,0.586509704589844
V
-1,0
BOT
0,0.346333333333333
V
0,1.08003616333008
V
-1,0
BOT
0,0.353
V
0,2.16388702392578
V
-1,0
BOT
0,0.359666666666667
V
0,4.45938110351563
V
-1,0
BOT
0,0.366333333333333
V
0,9.13524627685547
V
-1,0
BOT
0,0.373
V
0,18.1269645690918
V
-1,0
BOT
0,0.379666666666667
V
0,33.9174270629883
V
-1,0
BOT
0,0.386333333333333
V
0,58.7306022644043
V
-1,0
BOT
0,0.393
V
0,93.4262275695801
V
-1,0
BOT
0,0.399666666666667
V
0,136.508941650391
V
-1,0
BOT
0,0.406333333333333
V
0,183.741092681885
V
-1,0
BOT
0,0.413
V
0,228.794097900391
V
-1,0
BOT
0,0.419666666666667
V
0,264.997482299805
V
-1,0
BOT
0,0.426333333333333
V
0,287.375450134277
V
-1,0
BOT
0,0.433
V
0,293.875694274902
V
-1,0
BOT
0,0.439666666666667
V
0,285.641670227051
V
-1,0
BOT
0,0.446333333333333
V
0,266.456127166748
V
-1,0
BOT
0,0.453
V
0,241.472244262695
V
-1,0
BOT
0,0.459666666666667
V
0,215.53373336792
V
-1,0
BOT
0,0.466333333333333
V
0,191.930770874023
V
-1,0
BOT
0,0.473
V
0,172.365665435791
V
-1,0
BOT
0,0.479666666666667
V
0,157.737255096436
V
-1,0
BOT
0,0.486333333333333
V
0,148.891448974609
V
-1,0
BOT
0,0.493
V
0,146.47912979126
V
-1,0
BOT
0,0.499666666666667
V
0,149.988174438477
V
-1,0
BOT
0,0.506333333333333
V
0,157.585620880127
V
-1,0
BOT
0,0.513
V
0,166.863918304443
V
-1,0
BOT
0,0.519666666666667
V
0,175.738334655762
V
-1,0
BOT
0,0.526333333333333
V
0,182.492256164551
V
-1,0
BOT
0,0.533
V
0,185.917854309082
V
-1,0
BOT
0,0.539666666666667
V
0,185.851573944092
V
-1,0
BOT
0,0.546333333333334
V
0,182.143211364746
V
-1,0
BOT
0,0.553
V
0,173.610210418701
V
-1,0
BOT
0,0.559666666666667
V
0,158.376693725586
V
-1,0
BOT
0,0.566333333333333
V
0,135.715007781982
V
-1,0
BOT
0,0.573
V
0,106.729984283447
V
-1,0
BOT
0,0.579666666666667
V
0,73.6985206604004
V
-1,0
BOT
0,0.586333333333333
V
0,40.1773452758789
V
-1,0
BOT
0,0.593
V
0,10.6210708618164
V
-1,0
BOT
0,0.599666666666667
V
0,-11.1126899719238
V
-1,0
BOT
0,0.606333333333333
V
0,-23.529052734375
V
-1,0
BOT
0,0.613
V
0,-27.6556015014648
V
-1,0
BOT
0,0.619666666666667
V
0,-25.7329940795898
V
-1,0
BOT
0,0.626333333333333
V
0,-20.1029777526855
V
-1,0
BOT
0,0.633
V
0,-12.631893157959
V
-1,0
BOT
0,0.639666666666667
V
0,-4.62102890014648
V
-1,0
BOT
0,0.646333333333334
V
0,3.07083129882812
V
-1,0
BOT
0,0.653
V
0,9.90819931030273
V
-1,0
BOT
0,0.659666666666667
V
0,15.6102180480957
V
-1,0
BOT
0,0.666333333333334
V
0,20.0948715209961
V
-1,0
BOT
0,0.673
V
0,23.4189033508301
V
-1,0
BOT
0,0.679666666666667
V
0,25.7258415222168
V
-1,0
BOT
0,0.686333333333334
V
0,27.1954536437988
V
-1,0
BOT
0,0.693
V
0,28.0108451843262
V
-1,0
BOT
0,0.699666666666667
V
0,28.3451080322266
V
-1,0
BOT
0,0.706333333333333
V
0,28.3498764038086
V
-1,0
BOT
0,0.713
V
0,28.1476974487305
V
-1,0
BOT
0,0.719666666666667
V
0,27.8239250183105
V
-1,0
BOT
0,0.726333333333333
V
0,27.4319648742676
V
-1,0
BOT
0,0.733
V
0,27.0023345947266
V
-1,0
BOT
0,0.739666666666667
V
0,26.55029296875
V
-1,0
BOT
0,0.746333333333334
V
0,26.0820388793945
V
-1,0
BOT
0,0.753
V
0,25.6013870239258
V
-1,0
BOT
0,0.759666666666667
V
0,25.1145362854004
V
-1,0
BOT
0,0.766333333333333
V
0,24.6315002441406
V
-1,0
BOT
0,0.773
V
0,24.1670608520508
V
-1,0
BOT
0,0.779666666666667
V
0,23.7421989440918
V
-1,0
BOT
0,0.786333333333334
V
0,23.3936309814453
V
-1,0
BOT
0,0.793
V
0,23.169994354248
V
-1,0
BOT
0,0.799666666666667
V
0,23.1332778930664
V
-1,0
BOT
0,0.806333333333333
V
0,23.3469009399414
V
-1,0
BOT
0,0.813
V
0,23.8513946533203
V
-1,0
BOT
0,0.819666666666667
V
0,24.6453285217285
V
-1,0
BOT
0,0.826333333333334
V
0,25.662899017334
V
-1,0
BOT
0,0.833
V
0,26.789665222168
V
-1,0
BOT
0,0.839666666666667
V
0,27.8692245483398
V
-1,0
BOT
0,0.846333333333334
V
0,28.7408828735352
V
-1,0
BOT
0,0.853
V
0,29.271125793457
V
-1,0
BOT
0,0.859666666666667
V
0,29.381275177002
V
-1,0
BOT
0,0.866333333333333
V
0,29.0651321411133
V
-1,0
BOT
0,0.873
V
0,28.3770561218262
V
-1,0
BOT
0,0.879666666666667
V
0,27.4138450622559
V
-1,0
BOT
0,0.886333333333334
V
0,26.2908935546875
V
-1,0
BOT
0,0.893
V
0,25.1131057739258
V
-1,0
BOT
0,0.899666666666667
V
0,23.9648818969727
V
-1,0
BOT
0,0.906333333333333
V
0,22.9034423828125
V
-1,0
BOT
0,0.913
V
0,21.9578742980957
V
-1,0
BOT
0,0.919666666666667
V
0,21.1358070373535
V
-1,0
BOT
0,0.926333333333334
V
0,20.4339027404785
V
-1,0
BOT
0,0.933
V
0,19.8473930358887
V
-1,0
BOT
0,0.939666666666667
V
0,19.3710327148437
V
-1,0
BOT
0,0.946333333333334
V
0,18.9962387084961
V
-1,0
BOT
0,0.953
V
0,18.7139511108398
V
-1,0
BOT
0,0.959666666666667
V
0,18.5084342956543
V
-1,0
BOT
0,0.966333333333333
V
0,18.3582305908203
V
-1,0
BOT
0,0.973
V
0,18.2304382324219
V
-1,0
BOT
0,0.979666666666667
V
0,18.094539642334
V
-1,0
BOT
0,0.986333333333334
V
0,17.9228782653809
V
-1,0
BOT
0,0.993
V
0,17.6935195922852
V
-1,0
BOT
0,0.999666666666667
V
0,17.3931121826172
V
-1,0
BOT
0,1.00633333333333
V
0,17.0173645019531
V
-1,0
BOT
0,1.013
V
0,16.5724754333496
V
-1,0
BOT
0,1.01966666666667
V
0,16.0737037658691
V
-1,0
BOT
0,1.02633333333333
V
0,15.5429840087891
V
-1,0
BOT
0,1.033
V
0,15.0094032287598
V
-1,0
BOT
0,1.03966666666667
V
0,14.5015716552734
V
-1,0
BOT
0,1.04633333333333
V
0,14.0471458435059
V
-1,0
BOT
0,1.053
V
0,13.6661529541016
V
-1,0
BOT
0,1.05966666666667
V
0,13.3671760559082
V
-1,0
BOT
0,1.06633333333333
V
0,13.1473541259766
V
-1,0
BOT
0,1.073
V
0,12.9938125610352
V
-1,0
BOT
0,1.07966666666667
V
0,12.8903388977051
V
-1,0
BOT
0,1.08633333333333
V
0,12.819766998291
V
-1,0
BOT
0,1.093
V
0,12.7644538879395
V
-1,0
BOT
0,1.09966666666667
V
0,12.7105712890625
V
-1,0
BOT
0,1.10633333333333
V
0,12.6509666442871
V
-1,0
BOT
0,1.113
V
0,12.5808715820312
V
-1,0
BOT
0,1.11966666666667
V
0,12.4950408935547
V
-1,0
BOT
0,1.12633333333333
V
0,12.3872756958008
V
-1,0
BOT
0,1.133
V
0,12.2551918029785
V
-1,0
BOT
0,1.13966666666667
V
0,12.0959281921387
V
-1,0
BOT
0,1.14633333333333
V
0,11.9071006774902
V
-1,0
BOT
0,1.153
V
0,11.688232421875
V
-1,0
BOT
0,1.15966666666667
V
0,11.439323425293
V
-1,0
BOT
0,1.16633333333333
V
0,11.1641883850098
V
-1,0
BOT
0,1.173
V
0,10.869026184082
V
-1,0
BOT
0,1.17966666666667
V
0,10.5652809143066
V
-1,0
BOT
0,1.18633333333333
V
0,10.2677345275879
V
-1,0
BOT
0,1.193
V
0,9.98973846435547
V
-1,0
BOT
0,1.19966666666667
V
0,9.75513458251953
V
-1,0
BOT
0,1.20633333333333
V
0,9.59682464599609
V
-1,0
BOT
0,1.213
V
0,9.56058502197266
V
-1,0
BOT
0,1.21966666666667
V
0,9.70172882080078
V
-1,0
BOT
0,1.22633333333333
V
0,10.0827217102051
V
-1,0
BOT
0,1.233
V
0,10.7784271240234
V
-1,0
BOT
0,1.23966666666667
V
0,11.8637084960937
V
-1,0
BOT
0,1.24633333333333
V
0,13.3991241455078
V
-1,0
BOT
0,1.253
V
0,15.4132843017578
V
-1,0
BOT
0,1.25966666666667
V
0,17.8985595703125
V
-1,0
BOT
0,1.26633333333333
V
0,20.805835723877
V
-1,0
BOT
0,1.273
V
0,24.0426063537598
V
-1,0
BOT
0,1.27966666666667
V
0,27.4806022644043
V
-1,0
BOT
0,1.28633333333333
V
0,30.9724807739258
V
-1,0
BOT
0,1.293
V
0,34.3761444091797
V
-1,0
BOT
0,1.29966666666667
V
0,37.564754486084
V
-1,0
BOT
0,1.30633333333333
V
0,40.4438972473145
V
-1,0
BOT
0,1.313
V
0,42.9501533508301
V
-1,0
BOT
0,1.31966666666667
V
0,45.0563430786133
V
-1,0
BOT
0,1.32633333333333
V
0,46.7581748962402
V
-1,0
BOT
0,1.333
V
0,48.0570793151856
V
-1,0
BOT
0,1.33966666666667
V
0,48.9625930786133
V
-1,0
BOT
0,1.34633333333333
V
0,49.4794845581055
V
-1,0
BOT
0,1.353
V
0,49.6087074279785
V
-1,0
BOT
0,1.35966666666667
V
0,49.3407249450684
V
-1,0
BOT
0,1.36633333333333
V
0,48.668384552002
V
-1,0
BOT
0,1.373
V
0,47.5974082946777
V
-1,0
BOT
0,1.37966666666667
V
0,46.1478233337402
V
-1,0
BOT
0,1.38633333333333
V
0,44.3549156188965
V
-1,0
BOT
0,1.393
V
0,42.2673225402832
V
-1,0
BOT
0,1.39966666666667
V
0,39.9432182312012
V
-1,0
BOT
0,1.40633333333333
V
0,37.4531745910645
V
-1,0
BOT
0,1.413
V
0,34.8711013793945
V
-1,0
BOT
0,1.41966666666667
V
0,32.264232635498
V
-1,0
BOT
0,1.42633333333333
V
0,29.6945571899414
V
-1,0
BOT
0,1.433
V
0,27.2135734558105
V
-1,0
BOT
0,1.43966666666667
V
0,24.867057800293
V
-1,0
BOT
0,1.44633333333333
V
0,22.6850509643555
V
-1,0
BOT
0,1.453
V
0,20.6866264343262
V
-1,0
BOT
0,1.45966666666667
V
0,18.8837051391602
V
-1,0
BOT
0,1.46633333333333
V
0,17.2781944274902
V
-1,0
BOT
0,1.473
V
0,15.8696174621582
V
-1,0
BOT
0,1.47966666666667
V
0,14.6470069885254
V
-1,0
BOT
0,1.48633333333333
V
0,13.6008262634277
V
-1,0
BOT
0,1.493
V
0,12.7153396606445
V
-1,0
BOT
0,1.49966666666667
V
0,11.9724273681641
V
-1,0
BOT
0,1.50633333333333
V
0,11.3534927368164
V
-1,0
BOT
0,1.513
V
0,10.8394622802734
V
-1,0
BOT
0,1.51966666666667
V
0,10.4126930236816
V
-1,0
BOT
0,1.52633333333333
V
0,10.0555419921875
V
-1,0
BOT
0,1.533
V
0,9.75275039672852
V
-1,0
BOT
0,1.53966666666667
V
0,9.4914436340332
V
-1,0
BOT
0,1.54633333333333
V
0,9.26065444946289
V
-1,0
BOT
0,1.553
V
0,9.0489387512207
V
-1,0
BOT
0,1.55966666666667
V
0,8.84723663330078
V
-1,0
BOT
0,1.56633333333333
V
0,8.64839553833008
V
-1,0
BOT
0,1.573
V
0,8.45241546630859
V
-1,0
BOT
0,1.57966666666667
V
0,8.25786590576172
V
-1,0
BOT
0,1.58633333333333
V
0,8.06474685668945
V
-1,0
BOT
0,1.593
V
0,7.87019729614258
V
-1,0
BOT
0,1.59966666666667
V
0,7.6751708984375
V
-1,0
BOT
0,1.60633333333333
V
0,7.48395919799805
V
-1,0
BOT
0,1.613
V
0,7.29942321777344
V
-1,0
BOT
0,1.61966666666667
V
0,7.12013244628906
V
-1,0
BOT
0,1.62633333333333
V
0,6.94465637207031
V
-1,0
BOT
0,1.633
V
0,6.77394866943359
V
-1,0
BOT
0,1.63966666666667
V
0,6.61039352416992
V
-1,0
BOT
0,1.64633333333333
V
0,6.45351409912109
V
-1,0
BOT
0,1.653
V
0,6.3018798828125
V
-1,0
BOT
0,1.65966666666667
V
0,6.15596771240234
V
-1,0
BOT
0,1.66633333333333
V
0,6.01673126220703
V
-1,0
BOT
0,1.673
V
0,5.88607788085938
V
-1,0
BOT
0,1.67966666666667
V
0,5.76257705688477
V
-1,0
BOT
0,1.68633333333333
V
0,5.6462287902832
V
-1,0
BOT
0,1.693
V
0,5.53703308105469
V
-1,0
BOT
0,1.69966666666667
V
0,5.43498992919922
V
-1,0
BOT
0,1.70633333333333
V
0,5.34152984619141
V
-1,0
BOT
0,1.713
V
0,5.25903701782227
V
-1,0
BOT
0,1.71966666666667
V
0,5.19132614135742
V
-1,0
BOT
0,1.72633333333333
V
0,5.13982772827148
V
-1,0
BOT
0,1.733
V
0,5.10454177856445
V
-1,0
BOT
0,1.73966666666667
V
0,5.08928298950195
V
-1,0
BOT
0,1.74633333333333
V
0,5.0959587097168
V
-1,0
BOT
0,1.753
V
0,5.12838363647461
V
-1,0
BOT
0,1.75966666666667
V
0,5.18512725830078
V
-1,0
BOT
0,1.76633333333333
V
0,5.26523590087891
V
-1,0
BOT
0,1.773
V
0,5.3706169128418
V
-1,0
BOT
0,1.77966666666667
V
0,5.49936294555664
V
-1,0
BOT
0,1.78633333333333
V
0,5.64479827880859
V
-1,0
BOT
0,1.793
V
0,5.80024719238281
V
-1,0
BOT
0,1.79966666666667
V
0,5.95903396606445
V
-1,0
BOT
0,1.80633333333333
V
0,6.11734390258789
V
-1,0
BOT
0,1.813
V
0,6.2708854675293
V
-1,0
BOT
0,1.81966666666667
V
0,6.41632080078125
V
-1,0
BOT
0,1.82633333333333
V
0,6.55460357666016
V
-1,0
BOT
0,1.833
V
0,6.683349609375
V
-1,0
BOT
0,1.83966666666667
V
0,6.80255889892578
V
-1,0
BOT
0,1.84633333333333
V
0,6.90984725952148
V
-1,0
BOT
0,1.853
V
0,7.0037841796875
V
-1,0
BOT
0,1.85966666666667
V
0,7.0805549621582
V
-1,0
BOT
0,1.86633333333333
V
0,7.13682174682617
V
-1,0
BOT
0,1.873
V
0,7.17401504516602
V
-1,0
BOT
0,1.87966666666667
V
0,7.19308853149414
V
-1,0
BOT
0,1.88633333333333
V
0,7.19594955444336
V
-1,0
BOT
0,1.893
V
0,7.18021392822266
V
-1,0
BOT
0,1.89966666666667
V
0,7.14588165283203
V
-1,0
BOT
0,1.90633333333333
V
0,7.09056854248047
V
-1,0
BOT
0,1.913
V
0,7.01570510864258
V
-1,0
BOT
0,1.91966666666667
V
0,6.92415237426758
V
-1,0
BOT
0,1.92633333333333
V
0,6.82258605957031
V
-1,0
BOT
0,1.933
V
0,6.72006607055664
V
-1,0
BOT
0,1.93966666666667
V
0,6.62517547607422
V
-1,0
BOT
0,1.94633333333333
V
0,6.54983520507813
V
-1,0
BOT
0,1.953
V
0,6.50596618652344
V
-1,0
BOT
0,1.95966666666667
V
0,6.50978088378906
V
-1,0
BOT
0,1.96633333333333
V
0,6.57844543457031
V
-1,0
BOT
0,1.973
V
0,6.73294067382813
V
-1,0
BOT
0,1.97966666666667
V
0,6.99758529663086
V
-1,0
BOT
0,1.98633333333333
V
0,7.39812850952148
V
-1,0
BOT
0,1.993
V
0,7.95745849609375
V
-1,0
BOT
0,1.99966666666667
V
0,8.69274139404297
V
-1,0
BOT
0,2.00633333333333
V
0,9.61399078369141
V
-1,0
BOT
0,2.013
V
0,10.7207298278809
V
-1,0
BOT
0,2.01966666666667
V
0,12.0053291320801
V
-1,0
BOT
0,2.02633333333333
V
0,13.4472846984863
V
-1,0
BOT
0,2.033
V
0,15.019416809082
V
-1,0
BOT
0,2.03966666666667
V
0,16.6850090026855
V
-1,0
BOT
0,2.04633333333333
V
0,18.404483795166
V
-1,0
BOT
0,2.053
V
0,20.1377868652344
V
-1,0
BOT
0,2.05966666666667
V
0,21.8453407287598
V
-1,0
BOT
0,2.06633333333333
V
0,23.4899520874023
V
-1,0
BOT
0,2.073
V
0,25.0382423400879
V
-1,0
BOT
0,2.07966666666667
V
0,26.4596939086914
V
-1,0
BOT
0,2.08633333333333
V
0,27.7323722839355
V
-1,0
BOT
0,2.093
V
0,28.8357734680176
V
-1,0
BOT
0,2.09966666666667
V
0,29.7479629516602
V
-1,0
BOT
0,2.10633333333333
V
0,30.4512977600098
V
-1,0
BOT
0,2.113
V
0,30.9338569641113
V
-1,0
BOT
0,2.11966666666667
V
0,31.1923027038574
V
-1,0
BOT
0,2.12633333333333
V
0,31.2223434448242
V
-1,0
BOT
0,2.133
V
0,31.0282707214355
V
-1,0
BOT
0,2.13966666666667
V
0,30.6210517883301
V
-1,0
BOT
0,2.14633333333333
V
0,30.022144317627
V
-1,0
BOT
0,2.153
V
0,29.2520523071289
V
-1,0
BOT
0,2.15966666666667
V
0,28.3308029174805
V
-1,0
BOT
0,2.16633333333333
V
0,27.2817611694336
V
-1,0
BOT
0,2.173
V
0,26.1330604553223
V
-1,0
BOT
0,2.17966666666667
V
0,24.9104499816895
V
-1,0
BOT
0,2.18633333333333
V
0,23.6377716064453
V
-1,0
BOT
0,2.193
V
0,22.3369598388672
V
-1,0
BOT
0,2.19966666666667
V
0,21.0318565368652
V
-1,0
BOT
0,2.20633333333333
V
0,19.742488861084
V
-1,0
BOT
0,2.213
V
0,18.4822082519531
V
-1,0
BOT
0,2.21966666666667
V
0,17.2610282897949
V
-1,0
BOT
0,2.22633333333333
V
0,16.0884857177734
V
-1,0
BOT
0,2.233
V
0,14.9750709533691
V
-1,0
BOT
0,2.23966666666667
V
0,13.9279365539551
V
-1,0
BOT
0,2.24633333333333
V
0,12.9461288452148
V
-1,0
BOT
0,2.253
V
0,12.0344161987305
V
-1,0
BOT
0,2.25966666666667
V
0,11.195182800293
V
-1,0
BOT
0,2.26633333333333
V
0,10.4289054870605
V
-1,0
BOT
0,2.273
V
0,9.73129272460938
V
-1,0
BOT
0,2.27966666666667
V
0,9.10091400146484
V
-1,0
BOT
0,2.28633333333333
V
0,8.54158401489258
V
-1,0
BOT
0,2.293
V
0,8.05044174194336
V
-1,0
BOT
0,2.29966666666667
V
0,7.62224197387695
V
-1,0
BOT
0,2.30633333333333
V
0,7.24887847900391
V
-1,0
BOT
0,2.313
V
0,6.92892074584961
V
-1,0
BOT
0,2.31966666666667
V
0,6.65664672851563
V
-1,0
BOT
0,2.32633333333333
V
0,6.42681121826172
V
-1,0
BOT
0,2.333
V
0,6.23941421508789
V
-1,0
BOT
0,2.33966666666667
V
0,6.09016418457031
V
-1,0
BOT
0,2.34633333333333
V
0,5.97476959228516
V
-1,0
BOT
0,2.353
V
0,5.88512420654297
V
-1,0
BOT
0,2.35966666666667
V
0,5.81884384155273
V
-1,0
BOT
0,2.36633333333333
V
0,5.77068328857422
V
-1,0
BOT
0,2.373
V
0,5.73444366455078
V
-1,0
BOT
0,2.37966666666667
V
0,5.70821762084961
V
-1,0
BOT
0,2.38633333333333
V
0,5.69057464599609
V
-1,0
BOT
0,2.393
V
0,5.68389892578125
V
-1,0
BOT
0,2.39966666666667
V
0,5.68628311157227
V
-1,0
BOT
0,2.40633333333333
V
0,5.69963455200195
V
-1,0
BOT
0,2.413
V
0,5.7220458984375
V
-1,0
BOT
0,2.41966666666667
V
0,5.75399398803711
V
-1,0
BOT
0,2.42633333333333
V
0,5.79738616943359
V
-1,0
BOT
0,2.433
V
0,5.85317611694336
V
-1,0
BOT
0,2.43966666666667
V
0,5.9199333190918
V
-1,0
BOT
0,2.44633333333333
V
0,5.99575042724609
V
-1,0
BOT
0,2.453
V
0,6.08110427856445
V
-1,0
BOT
0,2.45966666666667
V
0,6.1793327331543
V
-1,0
BOT
0,2.46633333333333
V
0,6.28995895385742
V
-1,0
BOT
0,2.473
V
0,6.41059875488281
V
-1,0
BOT
0,2.47966666666667
V
0,6.53886795043945
V
-1,0
BOT
0,2.48633333333333
V
0,6.67238235473633
V
-1,0
BOT
0,2.493
V
0,6.80685043334961
V
-1,0
BOT
0,2.49966666666667
V
0,6.93559646606445
V
-1,0
BOT
0,2.50633333333333
V
0,7.05337524414063
V
-1,0
BOT
0,2.513
V
0,7.1568489074707
V
-1,0
BOT
0,2.51966666666667
V
0,7.24601745605469
V
-1,0
BOT
0,2.52633333333333
V
0,7.32040405273438
V
-1,0
BOT
0,2.533
V
0,7.37905502319336
V
-1,0
BOT
0,2.53966666666667
V
0,7.41910934448242
V
-1,0
BOT
0,2.54633333333333
V
0,7.43913650512695
V
-1,0
BOT
0,2.553
V
0,7.44056701660156
V
-1,0
BOT
0,2.55966666666667
V
0,7.42387771606445
V
-1,0
BOT
0,2.56633333333333
V
0,7.38716125488281
V
-1,0
BOT
0,2.573
V
0,7.33280181884766
V
-1,0
BOT
0,2.57966666666667
V
0,7.26604461669922
V
-1,0
BOT
0,2.58633333333333
V
0,7.1873664855957
V
-1,0
BOT
0,2.593
V
0,7.09867477416992
V
-1,0
BOT
0,2.59966666666667
V
0,6.99949264526367
V
-1,0
BOT
0,2.60633333333333
V
0,6.89411163330078
V
-1,0
BOT
0,2.613
V
0,6.78253173828125
V
-1,0
BOT
0,2.61966666666667
V
0,6.66570663452148
V
-1,0
BOT
0,2.62633333333333
V
0,6.54792785644531
V
-1,0
BOT
0,2.633
V
0,6.43157958984375
V
-1,0
BOT
0,2.63966666666667
V
0,6.31952285766602
V
-1,0
BOT
0,2.64633333333333
V
0,6.21414184570313
V
-1,0
BOT
0,2.653
V
0,6.11591339111328
V
-1,0
BOT
0,2.65966666666667
V
0,6.03103637695313
V
-1,0
BOT
0,2.66633333333333
V
0,5.96141815185547
V
-1,0
BOT
0,2.673
V
0,5.91135025024414
V
-1,0
BOT
0,2.67966666666667
V
0,5.88560104370117
V
-1,0
BOT
0,2.68633333333333
V
0,5.88750839233398
V
-1,0
BOT
0,2.693
V
0,5.92184066772461
V
-1,0
BOT
0,2.69966666666667
V
0,5.98907470703125
V
-1,0
BOT
0,2.70633333333333
V
0,6.08921051025391
V
-1,0
BOT
0,2.713
V
0,6.22129440307617
V
-1,0
BOT
0,2.71966666666667
V
0,6.38294219970703
V
-1,0
BOT
0,2.72633333333333
V
0,6.57224655151367
V
-1,0
BOT
0,2.733
V
0,6.78586959838867
V
-1,0
BOT
0,2.73966666666667
V
0,7.01808929443359
V
-1,0
BOT
0,2.74633333333333
V
0,7.26079940795898
V
-1,0
BOT
0,2.753
V
0,7.50875473022461
V
-1,0
BOT
0,2.75966666666667
V
0,7.75671005249023
V
-1,0
BOT
0,2.76633333333333
V
0,7.99989700317383
V
-1,0
BOT
0,2.773
V
0,8.23211669921875
V
-1,0
BOT
0,2.77966666666667
V
0,8.44764709472656
V
-1,0
BOT
0,2.78633333333333
V
0,8.64124298095703
V
-1,0
BOT
0,2.793
V
0,8.80670547485352
V
-1,0
BOT
0,2.79966666666667
V
0,8.93926620483398
V
-1,0
BOT
0,2.80633333333333
V
0,9.0327262878418
V
-1,0
BOT
0,2.813
V
0,9.08660888671875
V
-1,0
BOT
0,2.81966666666667
V
0,9.09996032714844
V
-1,0
BOT
0,2.82633333333333
V
0,9.07659530639648
V
-1,0
BOT
0,2.833
V
0,9.0184211730957
V
-1,0
BOT
0,2.83966666666667
V
0,8.92925262451172
V
-1,0
BOT
0,2.84633333333333
V
0,8.81099700927734
V
-1,0
BOT
0,2.853
V
0,8.66413116455078
V
-1,0
BOT
0,2.85966666666667
V
0,8.49199295043945
V
-1,0
BOT
0,2.86633333333333
V
0,8.29648971557617
V
-1,0
BOT
0,2.873
V
0,8.08143615722656
V
-1,0
BOT
0,2.87966666666667
V
0,7.84969329833984
V
-1,0
BOT
0,2.88633333333333
V
0,7.60698318481445
V
-1,0
BOT
0,2.893
V
0,7.35759735107422
V
-1,0
BOT
0,2.89966666666667
V
0,7.10678100585938
V
-1,0
BOT
0,2.90633333333333
V
0,6.85930252075195
V
-1,0
BOT
0,2.913
V
0,6.61754608154297
V
-1,0
BOT
0,2.91966666666667
V
0,6.38246536254883
V
-1,0
BOT
0,2.92633333333333
V
0,6.15453720092773
V
-1,0
BOT
0,2.933
V
0,5.93709945678711
V
-1,0
BOT
0,2.93966666666667
V
0,5.73062896728516
V
-1,0
BOT
0,2.94633333333333
V
0,5.53560256958008
V
-1,0
BOT
0,2.953
V
0,5.35774230957031
V
-1,0
BOT
0,2.95966666666667
V
0,5.20181655883789
V
-1,0
BOT
0,2.96633333333333
V
0,5.0663948059082
V
-1,0
BOT
0,2.973
V
0,4.95195388793945
V
-1,0
BOT
0,2.97966666666667
V
0,4.85897064208984
V
-1,0
BOT
0,2.98633333333333
V
0,4.79221343994141
V
-1,0
BOT
0,2.993
V
0,4.75072860717773
V
-1,0
BOT
0,2.99966666666667
V
0,4.73546981811523
V
-1,0
BOT
0,3.00633333333333
V
0,4.74834442138672
V
-1,0
BOT
0,3.013
V
0,4.79030609130859
V
-1,0
BOT
0,3.01966666666667
V
0,4.86516952514648
V
-1,0
BOT
0,3.02633333333333
V
0,4.97722625732422
V
-1,0
BOT
0,3.033
V
0,5.12981414794922
V
-1,0
BOT
0,3.03966666666667
V
0,5.32722473144531
V
-1,0
BOT
0,3.04633333333333
V
0,5.57708740234375
V
-1,0
BOT
0,3.053
V
0,5.89227676391602
V
-1,0
BOT
0,3.05966666666667
V
0,6.28519058227539
V
-1,0
BOT
0,3.06633333333333
V
0,6.76774978637695
V
-1,0
BOT
0,3.073
V
0,7.35616683959961
V
-1,0
BOT
0,3.07966666666667
V
0,8.07285308837891
V
-1,0
BOT
0,3.08633333333333
V
0,8.9421272277832
V
-1,0
BOT
0,3.093
V
0,9.98210906982422
V
-1,0
BOT
0,3.09966666666667
V
0,11.2094879150391
V
-1,0
BOT
0,3.10633333333333
V
0,12.6419067382812
V
-1,0
BOT
0,3.113
V
0,14.2917633056641
V
-1,0
BOT
0,3.11966666666667
V
0,16.1619186401367
V
-1,0
BOT
0,3.12633333333333
V
0,18.2466506958008
V
-1,0
BOT
0,3.133
V
0,20.5354690551758
V
-1,0
BOT
0,3.13966666666667
V
0,23.0121612548828
V
-1,0
BOT
0,3.14633333333333
V
0,25.6490707397461
V
-1,0
BOT
0,3.153
V
0,28.4066200256348
V
-1,0
BOT
0,3.15966666666667
V
0,31.2442779541016
V
-1,0
BOT
0,3.16633333333333
V
0,34.1153144836426
V
-1,0
BOT
0,3.173
V
0,36.9677543640137
V
-1,0
BOT
0,3.17966666666667
V
0,39.7419929504395
V
-1,0
BOT
0,3.18633333333333
V
0,42.381763458252
V
-1,0
BOT
0,3.193
V
0,44.8355674743652
V
-1,0
BOT
0,3.19966666666667
V
0,47.0542907714844
V
-1,0
BOT
0,3.20633333333333
V
0,48.9931106567383
V
-1,0
BOT
0,3.213
V
0,50.6162643432617
V
-1,0
BOT
0,3.21966666666667
V
0,51.9008636474609
V
-1,0
BOT
0,3.22633333333333
V
0,52.8321266174316
V
-1,0
BOT
0,3.233
V
0,53.4029006958008
V
-1,0
BOT
0,3.23966666666667
V
0,53.6155700683594
V
-1,0
BOT
0,3.24633333333333
V
0,53.4820556640625
V
-1,0
BOT
0,3.253
V
0,53.0223846435547
V
-1,0
BOT
0,3.25966666666667
V
0,52.2613525390625
V
-1,0
BOT
0,3.26633333333333
V
0,51.2266159057617
V
-1,0
BOT
0,3.273
V
0,49.950122833252
V
-1,0
BOT
0,3.27966666666667
V
0,48.4628677368164
V
-1,0
BOT
0,3.28633333333333
V
0,46.7996597290039
V
-1,0
BOT
0,3.293
V
0,44.9924468994141
V
-1,0
BOT
0,3.29966666666667
V
0,43.0736541748047
V
-1,0
BOT
0,3.30633333333333
V
0,41.074275970459
V
-1,0
BOT
0,3.313
V
0,39.0229225158691
V
-1,0
BOT
0,3.31966666666667
V
0,36.9491577148437
V
-1,0
BOT
0,3.32633333333333
V
0,34.8753929138184
V
-1,0
BOT
0,3.333
V
0,32.8230857849121
V
-1,0
BOT
0,3.33966666666667
V
0,30.8113098144531
V
-1,0
BOT
0,3.34633333333333
V
0,28.8586616516113
V
-1,0
BOT
0,3.353
V
0,26.979923248291
V
-1,0
BOT
0,3.35966666666667
V
0,25.1855850219727
V
-1,0
BOT
0,3.36633333333333
V
0,23.4847068786621
V
-1,0
BOT
0,3.373
V
0,21.8844413757324
V
-1,0
BOT
0,3.37966666666667
V
0,20.3952789306641
V
-1,0
BOT
0,3.38633333333333
V
0,19.0224647521973
V
-1,0
BOT
0,3.393
V
0,17.7674293518066
V
-1,0
BOT
0,3.39966666666667
V
0,16.6311264038086
V
-1,0
BOT
0,3.40633333333333
V
0,15.6106948852539
V
-1,0
BOT
0,3.413
V
0,14.7032737731934
V
-1,0
BOT
0,3.41966666666667
V
0,13.9040946960449
V
-1,0
BOT
0,3.42633333333333
V
0,13.206958770752
V
-1,0
BOT
0,3.433
V
0,12.6056671142578
V
-1,0
BOT
0,3.43966666666667
V
0,12.089729309082
V
-1,0
BOT
0,3.44633333333333
V
0,11.6491317749023
V
-1,0
BOT
0,3.453
V
0,11.2762451171875
V
-1,0
BOT
0,3.45966666666667
V
0,10.9610557556152
V
-1,0
BOT
0,3.46633333333333
V
0,10.6925964355469
V
-1,0
BOT
0,3.473
V
0,10.462760925293
V
-1,0
BOT
0,3.47966666666667
V
0,10.2643966674805
V
-1,0
BOT
0,3.48633333333333
V
0,10.0913047790527
V
-1,0
BOT
0,3.493
V
0,9.93776321411133
V
-1,0
BOT
0,3.49966666666667
V
0,9.7966194152832
V
-1,0
BOT
0,3.50633333333333
V
0,9.66405868530273
V
-1,0
BOT
0,3.513
V
0,9.53340530395508
V
-1,0
BOT
0,3.51966666666667
V
0,9.40322875976563
V
-1,0
BOT
0,3.52633333333333
V
0,9.27305221557617
V
-1,0
BOT
0,3.533
V
0,9.13906097412109
V
-1,0
BOT
0,3.53966666666667
V
0,8.99744033813477
V
-1,0
BOT
0,3.54633333333333
V
0,8.84532928466797
V
-1,0
BOT
0,3.553
V
0,8.68463516235352
V
-1,0
BOT
0,3.55966666666667
V
0,8.51583480834961
V
-1,0
BOT
0,3.56633333333333
V
0,8.33511352539063
V
-1,0
BOT
0,3.573
V
0,8.14628601074219
V
-1,0
BOT
0,3.57966666666667
V
0,7.95173645019531
V
-1,0
BOT
0,3.58633333333333
V
0,7.75480270385742
V
-1,0
BOT
0,3.593
V
0,7.5531005859375
V
-1,0
BOT
0,3.59966666666667
V
0,7.34949111938477
V
-1,0
BOT
0,3.60633333333333
V
0,7.14683532714844
V
-1,0
BOT
0,3.613
V
0,6.94656372070313
V
-1,0
BOT
0,3.61966666666667
V
0,6.74867630004883
V
-1,0
BOT
0,3.62633333333333
V
0,6.55460357666016
V
-1,0
BOT
0,3.633
V
0,6.36863708496094
V
-1,0
BOT
0,3.63966666666667
V
0,6.19363784790039
V
-1,0
BOT
0,3.64633333333333
V
0,6.02960586547852
V
-1,0
BOT
0,3.653
V
0,5.88035583496094
V
-1,0
BOT
0,3.65966666666667
V
0,5.74970245361328
V
-1,0
BOT
0,3.66633333333333
V
0,5.64050674438477
V
-1,0
BOT
0,3.673
V
0,5.55515289306641
V
-1,0
BOT
0,3.67966666666667
V
0,5.50174713134766
V
-1,0
BOT
0,3.68633333333333
V
0,5.49125671386719
V
-1,0
BOT
0,3.693
V
0,5.53703308105469
V
-1,0
BOT
0,3.69966666666667
V
0,5.65433502197266
V
-1,0
BOT
0,3.70633333333333
V
0,5.86032867431641
V
-1,0
BOT
0,3.713
V
0,6.17027282714844
V
-1,0
BOT
0,3.71966666666667
V
0,6.60467147827148
V
-1,0
BOT
0,3.72633333333333
V
0,7.1868896484375
V
-1,0
BOT
0,3.733
V
0,7.94124603271484
V
-1,0
BOT
0,3.73966666666667
V
0,8.89062881469727
V
-1,0
BOT
0,3.74633333333333
V
0,10.0622177124023
V
-1,0
BOT
0,3.753
V
0,11.4846229553223
V
-1,0
BOT
0,3.75966666666667
V
0,13.1783485412598
V
-1,0
BOT
0,3.76633333333333
V
0,15.1615142822266
V
-1,0
BOT
0,3.773
V
0,17.4455642700195
V
-1,0
BOT
0,3.77966666666667
V
0,20.0366973876953
V
-1,0
BOT
0,3.78633333333333
V
0,22.9272842407227
V
-1,0
BOT
0,3.793
V
0,26.1015892028809
V
-1,0
BOT
0,3.79966666666667
V
0,29.5376777648926
V
-1,0
BOT
0,3.80633333333333
V
0,33.200740814209
V
-1,0
BOT
0,3.813
V
0,37.0402336120605
V
-1,0
BOT
0,3.81966666666667
V
0,40.9975051879883
V
-1,0
BOT
0,3.82633333333333
V
0,45.0081825256348
V
-1,0
BOT
0,3.833
V
0,49.0012168884277
V
-1,0
BOT
0,3.83966666666667
V
0,52.9003143310547
V
-1,0
BOT
0,3.84633333333333
V
0,56.6253662109375
V
-1,0
BOT
0,3.853
V
0,60.1100921630859
V
-1,0
BOT
0,3.85966666666667
V
0,63.291072845459
V
-1,0
BOT
0,3.86633333333333
V
0,66.1144256591797
V
-1,0
BOT
0,3.873
V
0,68.537712097168
V
-1,0
BOT
0,3.87966666666667
V
0,70.5294609069824
V
-1,0
BOT
0,3.88633333333333
V
0,72.0705986022949
V
-1,0
BOT
0,3.893
V
0,73.1501579284668
V
-1,0
BOT
0,3.89966666666667
V
0,73.7690925598145
V
-1,0
BOT
0,3.90633333333333
V
0,73.9407539367676
V
-1,0
BOT
0,3.913
V
0,73.6837387084961
V
-1,0
BOT
0,3.91966666666667
V
0,73.026180267334
V
-1,0
BOT
0,3.92633333333333
V
0,72.0005035400391
V
-1,0
BOT
0,3.933
V
0,70.6477165222168
V
-1,0
BOT
0,3.93966666666667
V
0,69.0059661865234
V
-1,0
BOT
0,3.94633333333333
V
0,67.112922668457
V
-1,0
BOT
0,3.953
V
0,65.0057792663574
V
-1,0
BOT
0,3.95966666666667
V
0,62.7207756042481
V
-1,0
BOT
0,3.96633333333333
V
0,60.2941513061523
V
-1,0
BOT
0,3.973
V
0,57.7583312988281
V
-1,0
BOT
0,3.97966666666667
V
0,55.142879486084
V
-1,0
BOT
0,3.98633333333333
V
0,52.4778366088867
V
-1,0
BOT
0,3.993
V
0,49.7918128967285
V
-1,0
BOT
0,3.99966666666667
V
0,47.1105575561523
V
-1,0
BOT
0,4.00633333333333
V
0,44.4607734680176
V
-1,0
BOT
0,4.013
V
0,41.8620109558106
V
-1,0
BOT
0,4.01966666666667
V
0,39.3376350402832
V
-1,0
BOT
0,4.02633333333333
V
0,36.9081497192383
V
-1,0
BOT
0,4.033
V
0,34.5935821533203
V
-1,0
BOT
0,4.03966666666667
V
0,32.40966796875
V
-1,0
BOT
0,4.04633333333333
V
0,30.3716659545898
V
-1,0
BOT
0,4.053
V
0,28.4953117370605
V
-1,0
BOT
0,4.05966666666667
V
0,26.792049407959
V
-1,0
BOT
0,4.06633333333333
V
0,25.273323059082
V
-1,0
BOT
0,4.073
V
0,23.9477157592773
V
-1,0
BOT
0,4.07966666666667
V
0,22.824764251709
V
-1,0
BOT
0,4.08633333333333
V
0,21.906852722168
V
-1,0
BOT
0,4.093
V
0,21.1939811706543
V
-1,0
BOT
0,4.09966666666667
V
0,20.683765411377
V
-1,0
BOT
0,4.10633333333333
V
0,20.3704833984375
V
-1,0
BOT
0,4.113
V
0,20.2412605285645
V
-1,0
BOT
0,4.11966666666667
V
0,20.2794075012207
V
-1,0
BOT
0,4.12633333333333
V
0,20.4672813415527
V
-1,0
BOT
0,4.133
V
0,20.7862854003906
V
-1,0
BOT
0,4.13966666666667
V
0,21.2116241455078
V
-1,0
BOT
0,4.14633333333333
V
0,21.7127799987793
V
-1,0
BOT
0,4.153
V
0,22.2635269165039
V
-1,0
BOT
0,4.15966666666667
V
0,22.8385925292969
V
-1,0
BOT
0,4.16633333333333
V
0,23.4127044677734
V
-1,0
BOT
0,4.173
V
0,23.961067199707
V
-1,0
BOT
0,4.17966666666667
V
0,24.4631767272949
V
-1,0
BOT
0,4.18633333333333
V
0,24.9056816101074
V
-1,0
BOT
0,4.193
V
0,25.2776145935059
V
-1,0
BOT
0,4.19966666666667
V
0,25.5651473999023
V
-1,0
BOT
0,4.20633333333333
V
0,25.7606506347656
V
-1,0
BOT
0,4.213
V
0,25.8626937866211
V
-1,0
BOT
0,4.21966666666667
V
0,25.8731842041016
V
-1,0
BOT
0,4.22633333333333
V
0,25.7940292358398
V
-1,0
BOT
0,4.233
V
0,25.632381439209
V
-1,0
BOT
0,4.23966666666667
V
0,25.3992080688477
V
-1,0
BOT
0,4.24633333333333
V
0,25.108814239502
V
-1,0
BOT
0,4.253
V
0,24.7740745544434
V
-1,0
BOT
0,4.25966666666667
V
0,24.409294128418
V
-1,0
BOT
0,4.26633333333333
V
0,24.0292549133301
V
-1,0
BOT
0,4.273
V
0,23.6530303955078
V
-1,0
BOT
0,4.27966666666667
V
0,23.2963562011719
V
-1,0
BOT
0,4.28633333333333
V
0,22.9744911193848
V
-1,0
BOT
0,4.293
V
0,22.7031707763672
V
-1,0
BOT
0,4.29966666666667
V
0,22.496223449707
V
-1,0
BOT
0,4.30633333333333
V
0,22.3641395568848
V
-1,0
BOT
0,4.313
V
0,22.3121643066406
V
-1,0
BOT
0,4.31966666666667
V
0,22.3450660705566
V
-1,0
BOT
0,4.32633333333333
V
0,22.4666595458984
V
-1,0
BOT
0,4.333
V
0,22.674560546875
V
-1,0
BOT
0,4.33966666666667
V
0,22.9630470275879
V
-1,0
BOT
0,4.34633333333333
V
0,23.3249664306641
V
-1,0
BOT
0,4.353
V
0,23.7517356872559
V
-1,0
BOT
0,4.35966666666667
V
0,24.2300033569336
V
-1,0
BOT
0,4.36633333333333
V
0,24.7411727905273
V
-1,0
BOT
0,4.373
V
0,25.2666473388672
V
-1,0
BOT
0,4.37966666666667
V
0,25.7868766784668
V
-1,0
BOT
0,4.38633333333333
V
0,26.282787322998
V
-1,0
BOT
0,4.393
V
0,26.7353057861328
V
-1,0
BOT
0,4.39966666666667
V
0,27.1286964416504
V
-1,0
BOT
0,4.40633333333333
V
0,27.4491310119629
V
-1,0
BOT
0,4.413
V
0,27.6827812194824
V
-1,0
BOT
0,4.41966666666667
V
0,27.8167724609375
V
-1,0
BOT
0,4.42633333333333
V
0,27.8477668762207
V
-1,0
BOT
0,4.433
V
0,27.7738571166992
V
-1,0
BOT
0,4.43966666666667
V
0,27.5964736938477
V
-1,0
BOT
0,4.44633333333333
V
0,27.3194313049316
V
-1,0
BOT
0,4.453
V
0,26.9479751586914
V
-1,0
BOT
0,4.45966666666667
V
0,26.4906883239746
V
-1,0
BOT
0,4.46633333333333
V
0,25.9547233581543
V
-1,0
BOT
0,4.473
V
0,25.3472328186035
V
-1,0
BOT
0,4.47966666666667
V
0,24.6772766113281
V
-1,0
BOT
0,4.48633333333333
V
0,23.9548683166504
V
-1,0
BOT
0,4.493
V
0,23.1895446777344
V
-1,0
BOT
0,4.49966666666667
V
0,22.3932266235352
V
-1,0
BOT
0,4.50633333333333
V
0,21.5725898742676
V
-1,0
BOT
0,4.513
V
0,20.7357406616211
V
-1,0
BOT
0,4.51966666666667
V
0,19.890308380127
V
-1,0
BOT
0,4.52633333333333
V
0,19.04296875
V
-1,0
BOT
0,4.533
V
0,18.1965827941895
V
-1,0
BOT
0,4.53966666666667
V
0,17.3544883728027
V
-1,0
BOT
0,4.54633333333333
V
0,16.5195465087891
V
-1,0
BOT
0,4.553
V
0,15.6960487365723
V
-1,0
BOT
0,4.55966666666667
V
0,14.8897171020508
V
-1,0
BOT
0,4.56633333333333
V
0,14.1067504882812
V
-1,0
BOT
0,4.573
V
0,13.3509635925293
V
-1,0
BOT
0,4.57966666666667
V
0,12.6256942749023
V
-1,0
BOT
0,4.58633333333333
V
0,11.9318962097168
V
-1,0
BOT
0,4.593
V
0,11.2709999084473
V
-1,0
BOT
0,4.59966666666667
V
0,10.6430053710937
V
-1,0
BOT
0,4.60633333333333
V
0,10.0488662719727
V
-1,0
BOT
0,4.613
V
0,9.48667526245117
V
-1,0
BOT
0,4.61966666666667
V
0,8.95595550537109
V
-1,0
BOT
0,4.62633333333333
V
0,8.45861434936523
V
-1,0
BOT
0,4.633
V
0,7.9951286315918
V
-1,0
BOT
0,4.63966666666667
V
0,7.56216049194336
V
-1,0
BOT
0,4.64633333333333
V
0,7.15732574462891
V
-1,0
BOT
0,4.653
V
0,6.78300857543945
V
-1,0
BOT
0,4.65966666666667
V
0,6.4396858215332
V
-1,0
BOT
0,4.66633333333333
V
0,6.12735748291016
V
-1,0
BOT
0,4.673
V
0,5.8441162109375
V
-1,0
BOT
0,4.67966666666667
V
0,5.58853149414063
V
-1,0
BOT
0,4.68633333333333
V
0,5.35964965820313
V
-1,0
BOT
0,4.693
V
0,5.15317916870117
V
-1,0
BOT
0,4.69966666666667
V
0,4.96721267700195
V
-1,0
BOT
0,4.70633333333333
V
0,4.79841232299805
V
-1,0
BOT
0,4.713
V
0,4.64677810668945
V
-1,0
BOT
0,4.71966666666667
V
0,4.51183319091797
V
-1,0
BOT
0,4.72633333333333
V
0,4.38928604125977
V
-1,0
BOT
0,4.733
V
0,4.27818298339844
V
-1,0
BOT
0,4.73966666666667
V
0,4.17470932006836
V
-1,0
BOT
0,4.74633333333333
V
0,4.08172607421875
V
-1,0
BOT
0,4.753
V
0,3.99684906005859
V
-1,0
BOT
0,4.75966666666667
V
0,3.92007827758789
V
-1,0
BOT
0,4.76633333333333
V
0,3.85189056396484
V
-1,0
BOT
0,4.773
V
0,3.79133224487305
V
-1,0
BOT
0,4.77966666666667
V
0,3.73744964599609
V
-1,0
BOT
0,4.78633333333333
V
0,3.68881225585937
V
-1,0
BOT
0,4.793
V
0,3.64542007446289
V
-1,0
BOT
0,4.79966666666667
V
0,3.60536575317383
V
-1,0
BOT
0,4.80633333333333
V
0,3.56721878051758
V
-1,0
BOT
0,4.813
V
0,3.52907180786133
V
-1,0
BOT
0,4.81966666666667
V
0,3.49235534667969
V
-1,0
BOT
0,4.82633333333333
V
0,3.45706939697266
V
-1,0
BOT
0,4.833
V
0,3.42226028442383
V
-1,0
BOT
0,4.83966666666667
V
0,3.38602066040039
V
-1,0
BOT
0,4.84633333333333
V
0,3.34882736206055
V
-1,0
BOT
0,4.853
V
0,3.31211090087891
V
-1,0
BOT
0,4.85966666666667
V
0,3.27634811401367
V
-1,0
BOT
0,4.86633333333333
V
0,3.24106216430664
V
-1,0
BOT
0,4.873
V
0,3.20577621459961
V
-1,0
BOT
0,4.87966666666667
V
0,3.17192077636719
V
-1,0
BOT
0,4.88633333333333
V
0,3.13806533813477
V
-1,0
BOT
0,4.893
V
0,3.10373306274414
V
-1,0
BOT
0,4.89966666666667
V
0,3.07035446166992
V
-1,0
BOT
0,4.90633333333333
V
0,3.03983688354492
V
-1,0
BOT
0,4.913
V
0,3.01361083984375
V
-1,0
BOT
0,4.91966666666667
V
0,2.98929214477539
V
-1,0
BOT
0,4.92633333333333
V
0,2.96545028686523
V
-1,0
BOT
0,4.933
V
0,2.94256210327148
V
-1,0
BOT
0,4.93966666666667
V
0,2.92253494262695
V
-1,0
BOT
0,4.94633333333333
V
0,2.90489196777344
V
-1,0
BOT
0,4.953
V
0,2.88915634155273
V
-1,0
BOT
0,4.95966666666667
V
0,2.87628173828125
V
-1,0
BOT
0,4.96633333333333
V
0,2.87342071533203
V
-1,0
BOT
0,4.973
V
0,2.87771224975586
V
-1,0
BOT
0,4.97966666666667
V
0,2.88963317871094
V
-1,0
BOT
0,4.98633333333333
V
0,2.90536880493164
V
-1,0
BOT
0,4.993
V
0,2.92778015136719
V
-1,0
BOT
0,4.99966666666667
V
0,2.95639038085937
V
-1,0
BOT
0,5.00633333333333
V
0,2.98786163330078
V
-1,0
BOT
0,5.013
V
0,3.02410125732422
V
-1,0
BOT
0,5.01966666666667
V
0,3.06272506713867
V
-1,0
BOT
0,5.02633333333333
V
0,3.10516357421875
V
-1,0
BOT
0,5.033
V
0,3.14950942993164
V
-1,0
BOT
0,5.03966666666667
V
0,3.19671630859375
V
-1,0
BOT
0,5.04633333333333
V
0,3.24630737304687
V
-1,0
BOT
0,5.053
V
0,3.29494476318359
V
-1,0
BOT
0,5.05966666666667
V
0,3.3416748046875
V
-1,0
BOT
0,5.06633333333333
V
0,3.38506698608398
V
-1,0
BOT
0,5.073
V
0,3.42321395874023
V
-1,0
BOT
0,5.07966666666667
V
0,3.45373153686523
V
-1,0
BOT
0,5.08633333333333
V
0,3.47805023193359
V
-1,0
BOT
0,5.093
V
0,3.49950790405273
V
-1,0
BOT
0,5.09966666666667
V
0,3.51667404174805
V
-1,0
BOT
0,5.10633333333333
V
0,3.53002548217773
V
-1,0
BOT
0,5.113
V
0,3.53813171386719
V
-1,0
BOT
0,5.11966666666667
V
0,3.54194641113281
V
-1,0
BOT
0,5.12633333333333
V
0,3.53908538818359
V
-1,0
BOT
0,5.133
V
0,3.53002548217773
V
-1,0
BOT
0,5.13966666666667
V
0,3.51858139038086
V
-1,0
BOT
0,5.14633333333333
V
0,3.50522994995117
V
-1,0
BOT
0,5.153
V
0,3.48806381225586
V
-1,0
BOT
0,5.15966666666667
V
0,3.46708297729492
V
-1,0
BOT
0,5.16633333333333
V
0,3.44276428222656
V
-1,0
BOT
0,5.173
V
0,3.41510772705078
V
-1,0
BOT
0,5.17966666666667
V
0,3.38411331176758
V
-1,0
BOT
0,5.18633333333333
V
0,3.35168838500977
V
-1,0
BOT
0,5.193
V
0,3.31926345825195
V
-1,0
BOT
0,5.19966666666667
V
0,3.28540802001953
V
-1,0
BOT
0,5.20633333333333
V
0,3.24869155883789
V
-1,0
BOT
0,5.213
V
0,3.21102142333984
V
-1,0
BOT
0,5.21966666666667
V
0,3.17096710205078
V
-1,0
BOT
0,5.22633333333333
V
0,3.12995910644531
V
-1,0
BOT
0,5.233
V
0,3.08895111083984
V
-1,0
BOT
0,5.23966666666667
V
0,3.04889678955078
V
-1,0
BOT
0,5.24633333333333
V
0,3.00979614257812
V
-1,0
BOT
0,5.253
V
0,2.96974182128906
V
-1,0
BOT
0,5.25966666666667
V
0,2.9301643371582
V
-1,0
BOT
0,5.26633333333333
V
0,2.89058685302734
V
-1,0
BOT
0,5.273
V
0,2.84957885742187
V
-1,0
BOT
0,5.27966666666667
V
0,2.80618667602539
V
-1,0
BOT
0,5.28633333333333
V
0,2.7618408203125
V
-1,0
BOT
0,5.293
V
0,2.71987915039062
V
-1,0
BOT
0,5.29966666666667
V
0,2.68030166625977
V
-1,0
BOT
0,5.30633333333333
V
0,2.64263153076172
V
-1,0
BOT
0,5.313
V
0,2.60448455810547
V
-1,0
BOT
0,5.31966666666667
V
0,2.56776809692383
V
-1,0
BOT
0,5.32633333333333
V
0,2.53152847290039
V
-1,0
BOT
0,5.333
V
0,2.49671936035156
V
-1,0
BOT
0,5.33966666666667
V
0,2.46334075927734
V
-1,0
BOT
0,5.34633333333333
V
0,2.43234634399414
V
-1,0
BOT
0,5.353
V
0,2.40468978881836
V
-1,0
BOT
0,5.35966666666667
V
0,2.38180160522461
V
-1,0
BOT
0,5.36633333333333
V
0,2.36415863037109
V
-1,0
BOT
0,5.373
V
0,2.3493766784668
V
-1,0
BOT
0,5.37966666666667
V
0,2.33697891235352
V
-1,0
BOT
0,5.38633333333333
V
0,2.32839584350586
V
-1,0
BOT
0,5.393
V
0,2.32696533203125
V
-1,0
BOT
0,5.39966666666667
V
0,2.33316421508789
V
-1,0
BOT
0,5.40633333333333
V
0,2.34460830688477
V
-1,0
BOT
0,5.413
V
0,2.36368179321289
V
-1,0
BOT
0,5.41966666666667
V
0,2.39133834838867
V
-1,0
BOT
0,5.42633333333333
V
0,2.42757797241211
V
-1,0
BOT
0,5.433
V
0,2.47335433959961
V
-1,0
BOT
0,5.43966666666667
V
0,2.52866744995117
V
-1,0
BOT
0,5.44633333333333
V
0,2.59685516357422
V
-1,0
BOT
0,5.453
V
0,2.67744064331055
V
-1,0
BOT
0,5.45966666666667
V
0,2.77090072631836
V
-1,0
BOT
0,5.46633333333333
V
0,2.87723541259766
V
-1,0
BOT
0,5.473
V
0,2.99453735351562
V
-1,0
BOT
0,5.47966666666667
V
0,3.12137603759766
V
-1,0
BOT
0,5.48633333333333
V
0,3.25822830200195
V
-1,0
BOT
0,5.493
V
0,3.4031867980957
V
-1,0
BOT
0,5.49966666666667
V
0,3.55434417724609
V
-1,0
BOT
0,5.50633333333333
V
0,3.71026992797852
V
-1,0
BOT
0,5.513
V
0,3.87048721313477
V
-1,0
BOT
0,5.51966666666667
V
0,4.03261184692383
V
-1,0
BOT
0,5.52633333333333
V
0,4.19139862060547
V
-1,0
BOT
0,5.533
V
0,4.34541702270508
V
-1,0
BOT
0,5.53966666666667
V
0,4.49371337890625
V
-1,0
BOT
0,5.54633333333333
V
0,4.63104248046875
V
-1,0
BOT
0,5.553
V
0,4.75406646728516
V
-1,0
BOT
0,5.55966666666667
V
0,4.85992431640625
V
-1,0
BOT
0,5.56633333333333
V
0,4.95004653930664
V
-1,0
BOT
0,5.573
V
0,5.02681732177734
V
-1,0
BOT
0,5.57966666666667
V
0,5.08737564086914
V
-1,0
BOT
0,5.58633333333333
V
0,5.13267517089844
V
-1,0
BOT
0,5.593
V
0,5.16271591186523
V
-1,0
BOT
0,5.59966666666667
V
0,5.17940521240234
V
-1,0
BOT
0,5.60633333333333
V
0,5.18274307250977
V
-1,0
BOT
0,5.613
V
0,5.17177581787109
V
-1,0
BOT
0,5.61966666666667
V
0,5.14793395996094
V
-1,0
BOT
0,5.62633333333333
V
0,5.11264801025391
V
-1,0
BOT
0,5.633
V
0,5.06877899169922
V
-1,0
BOT
0,5.63966666666667
V
0,5.01775741577148
V
-1,0
BOT
0,5.64633333333333
V
0,4.96006011962891
V
-1,0
BOT
0,5.653
V
0,4.89568710327148
V
-1,0
BOT
0,5.65966666666667
V
0,4.82463836669922
V
-1,0
BOT
0,5.66633333333333
V
0,4.7459602355957
V
-1,0
BOT
0,5.673
V
0,4.66108322143555
V
-1,0
BOT
0,5.67966666666667
V
0,4.57048416137695
V
-1,0
BOT
0,5.68633333333333
V
0,4.47702407836914
V
-1,0
BOT
0,5.693
V
0,4.38308715820313
V
-1,0
BOT
0,5.69966666666667
V
0,4.28628921508789
V
-1,0
BOT
0,5.70633333333333
V
0,4.18710708618164
V
-1,0
BOT
0,5.713
V
0,4.08792495727539
V
-1,0
BOT
0,5.71966666666667
V
0,3.99112701416016
V
-1,0
BOT
0,5.72633333333333
V
0,3.89575958251953
V
-1,0
BOT
0,5.733
V
0,3.80134582519531
V
-1,0
BOT
0,5.73966666666667
V
0,3.70693206787109
V
-1,0
BOT
0,5.74633333333333
V
0,3.61537933349609
V
-1,0
BOT
0,5.753
V
0,3.52621078491211
V
-1,0
BOT
0,5.75966666666667
V
0,3.43847274780273
V
-1,0
BOT
0,5.76633333333333
V
0,3.35025787353516
V
-1,0
BOT
0,5.773
V
0,3.26442718505859
V
-1,0
BOT
0,5.77966666666667
V
0,3.18336486816406
V
-1,0
BOT
0,5.78633333333333
V
0,3.10659408569336
V
-1,0
BOT
0,5.793
V
0,3.03173065185547
V
-1,0
BOT
0,5.79966666666667
V
0,2.95877456665039
V
-1,0
BOT
0,5.80633333333333
V
0,2.89058685302734
V
-1,0
BOT
0,5.813
V
0,2.82812118530273
V
-1,0
BOT
0,5.81966666666667
V
0,2.77137756347656
V
-1,0
BOT
0,5.82633333333333
V
0,2.71749496459961
V
-1,0
BOT
0,5.833
V
0,2.66647338867187
V
-1,0
BOT
0,5.83966666666667
V
0,2.62069702148437
V
-1,0
BOT
0,5.84633333333333
V
0,2.58064270019531
V
-1,0
BOT
0,5.853
V
0,2.54535675048828
V
-1,0
BOT
0,5.85966666666667
V
0,2.51150131225586
V
-1,0
BOT
0,5.86633333333333
V
0,2.48193740844727
V
-1,0
BOT
0,5.873
V
0,2.45809555053711
V
-1,0
BOT
0,5.87966666666667
V
0,2.43711471557617
V
-1,0
BOT
0,5.88633333333333
V
0,2.41518020629883
V
-1,0
BOT
0,5.893
V
0,2.39181518554687
V
-1,0
BOT
0,5.89966666666667
V
0,2.36940383911133
V
-1,0
BOT
0,5.90633333333333
V
0,2.34842300415039
V
-1,0
BOT
0,5.913
V
0,2.32791900634766
V
-1,0
BOT
0,5.91966666666667
V
0,2.30884552001953
V
-1,0
BOT
0,5.92633333333333
V
0,2.29072570800781
V
-1,0
BOT
0,5.933
V
0,2.2735595703125
V
-1,0
BOT
0,5.93966666666667
V
0,2.25543975830078
V
-1,0
BOT
0,5.94633333333333
V
0,2.23827362060547
V
-1,0
BOT
0,5.953
V
0,2.21967697143555
V
-1,0
BOT
0,5.95966666666667
V
0,2.19869613647461
V
-1,0
BOT
0,5.96633333333333
V
0,2.17628479003906
V
-1,0
BOT
0,5.973
V
0,2.15435028076172
V
-1,0
BOT
0,5.97966666666667
V
0,2.13241577148437
V
-1,0
BOT
0,5.98633333333333
V
0,2.10952758789062
V
-1,0
BOT
0,5.993
V
0,2.08377838134766
V
-1,0
BOT
0,5.99966666666667
V
0,2.05707550048828
V
-1,0
BOT
0,6.00633333333333
V
0,2.03132629394531
V
-1,0
BOT
0,6.013
V
0,2.00366973876953
V
-1,0
BOT
0,6.01966666666667
V
0,1.97315216064453
V
-1,0
BOT
0,6.02633333333333
V
0,1.94168090820312
V
-1,0
BOT
0,6.033
V
0,1.91116333007812
V
-1,0
BOT
0,6.03966666666667
V
0,1.88064575195312
V
-1,0
BOT
0,6.04633333333333
V
0,1.84822082519531
V
-1,0
BOT
0,6.053
V
0,1.8157958984375
V
-1,0
BOT
0,6.05966666666667
V
0,1.7852783203125
V
-1,0
BOT
0,6.06633333333333
V
0,1.7547607421875
V
-1,0
BOT
0,6.073
V
0,1.7242431640625
V
-1,0
BOT
0,6.07966666666667
V
0,1.6937255859375
V
-1,0
BOT
0,6.08633333333333
V
0,1.66463851928711
V
-1,0
BOT
0,6.093
V
0,1.63888931274414
V
-1,0
BOT
0,6.09966666666667
V
0,1.61409378051758
V
-1,0
BOT
0,6.10633333333333
V
0,1.59072875976562
V
-1,0
BOT
0,6.113
V
0,1.56784057617187
V
-1,0
BOT
0,6.11966666666667
V
0,1.54542922973633
V
-1,0
BOT
0,6.12633333333333
V
0,1.52254104614258
V
-1,0
BOT
0,6.133
V
0,1.49679183959961
V
-1,0
BOT
0,6.13966666666667
V
0,1.47199630737305
V
-1,0
BOT
0,6.14633333333333
V
0,1.44720077514648
V
-1,0
BOT
0,6.153
V
0,1.42383575439453
V
-1,0
BOT
0,6.15966666666667
V
0,1.39999389648437
V
-1,0
BOT
0,6.16633333333333
V
0,1.37805938720703
V
-1,0
BOT
0,6.173
V
0,1.36089324951172
V
-1,0
BOT
0,6.17966666666667
V
0,1.34515762329102
V
-1,0
BOT
0,6.18633333333333
V
0,1.33037567138672
V
-1,0
BOT
0,6.193
V
0,1.31654739379883
V
-1,0
BOT
0,6.19966666666667
V
0,1.30558013916016
V
-1,0
BOT
0,6.20633333333333
V
0,1.2965202331543
V
-1,0
BOT
0,6.213
V
0,1.28650665283203
V
-1,0
BOT
0,6.21966666666667
V
0,1.27649307250977
V
-1,0
BOT
0,6.22633333333333
V
0,1.26743316650391
V
-1,0
BOT
0,6.233
V
0,1.25980377197266
V
-1,0
BOT
0,6.23966666666667
V
0,1.25408172607422
V
-1,0
BOT
0,6.24633333333333
V
0,1.2507438659668
V
-1,0
BOT
0,6.253
V
0,1.25026702880859
V
-1,0
BOT
0,6.25966666666667
V
0,1.251220703125
V
-1,0
BOT
0,6.26633333333333
V
0,1.25217437744141
V
-1,0
BOT
0,6.273
V
0,1.25598907470703
V
-1,0
BOT
0,6.27966666666667
V
0,1.26361846923828
V
-1,0
BOT
0,6.28633333333333
V
0,1.27458572387695
V
-1,0
BOT
0,6.293
V
0,1.28602981567383
V
-1,0
BOT
0,6.29966666666667
V
0,1.29938125610352
V
-1,0
BOT
0,6.30633333333333
V
0,1.31893157958984
V
-1,0
BOT
0,6.313
V
0,1.34181976318359
V
-1,0
BOT
0,6.31966666666667
V
0,1.36375427246094
V
-1,0
BOT
0,6.32633333333333
V
0,1.38235092163086
V
-1,0
BOT
0,6.333
V
0,1.40142440795898
V
-1,0
BOT
0,6.33966666666667
V
0,1.42431259155273
V
-1,0
BOT
0,6.34633333333333
V
0,1.44767761230469
V
-1,0
BOT
0,6.353
V
0,1.47247314453125
V
-1,0
BOT
0,6.35966666666667
V
0,1.50203704833984
V
-1,0
BOT
0,6.36633333333333
V
0,1.53875350952148
V
-1,0
BOT
0,6.373
V
0,1.58119201660156
V
-1,0
BOT
0,6.37966666666667
V
0,1.62553787231445
V
-1,0
BOT
0,6.38633333333333
V
0,1.67083740234375
V
-1,0
BOT
0,6.393
V
0,1.71709060668945
V
-1,0
BOT
0,6.39966666666667
V
0,1.76334381103516
V
-1,0
BOT
0,6.40633333333333
V
0,1.80959701538086
V
-1,0
BOT
0,6.413
V
0,1.85728073120117
V
-1,0
BOT
0,6.41966666666667
V
0,1.90591812133789
V
-1,0
BOT
0,6.42633333333333
V
0,1.95217132568359
V
-1,0
BOT
0,6.433
V
0,1.99508666992187
V
-1,0
BOT
0,6.43966666666667
V
0,2.03371047973633
V
-1,0
BOT
0,6.44633333333333
V
0,2.06995010375977
V
-1,0
BOT
0,6.453
V
0,2.10046768188477
V
-1,0
BOT
0,6.45966666666667
V
0,2.12764739990234
V
-1,0
BOT
0,6.46633333333333
V
0,2.15339660644531
V
-1,0
BOT
0,6.473
V
0,2.18009948730469
V
-1,0
BOT
0,6.47966666666667
V
0,2.20632553100586
V
-1,0
BOT
0,6.48633333333333
V
0,2.22921371459961
V
-1,0
BOT
0,6.493
V
0,2.24971771240234
V
-1,0
BOT
0,6.49966666666667
V
0,2.26545333862305
V
-1,0
BOT
0,6.50633333333333
V
0,2.27785110473633
V
-1,0
BOT
0,6.513
V
0,2.28595733642578
V
-1,0
BOT
0,6.51966666666667
V
0,2.29215621948242
V
-1,0
BOT
0,6.52633333333333
V
0,2.29549407958984
V
-1,0
BOT
0,6.533
V
0,2.29644775390625
V
-1,0
BOT
0,6.53966666666667
V
0,2.29644775390625
V
-1,0
BOT
0,6.54633333333333
V
0,2.29501724243164
V
-1,0
BOT
0,6.553
V
0,2.29406356811523
V
-1,0
BOT
0,6.55966666666667
V
0,2.29501724243164
V
-1,0
BOT
0,6.56633333333333
V
0,2.29883193969727
V
-1,0
BOT
0,6.573
V
0,2.30503082275391
V
-1,0
BOT
0,6.57966666666667
V
0,2.31361389160156
V
-1,0
BOT
0,6.58633333333333
V
0,2.32505798339844
V
-1,0
BOT
0,6.593
V
0,2.34270095825195
V
-1,0
BOT
0,6.59966666666667
V
0,2.36701965332031
V
-1,0
BOT
0,6.60633333333333
V
0,2.39706039428711
V
-1,0
BOT
0,6.613
V
0,2.43473052978516
V
-1,0
BOT
0,6.61966666666667
V
0,2.48336791992187
V
-1,0
BOT
0,6.62633333333333
V
0,2.54678726196289
V
-1,0
BOT
0,6.633
V
0,2.62451171875
V
-1,0
BOT
0,6.63966666666667
V
0,2.71463394165039
V
-1,0
BOT
0,6.64633333333333
V
0,2.81715393066406
V
-1,0
BOT
0,6.653
V
0,2.93445587158203
V
-1,0
BOT
0,6.65966666666667
V
0,3.06606292724609
V
-1,0
BOT
0,6.66633333333333
V
0,3.20768356323242
V
-1,0
BOT
0,6.673
V
0,3.35836410522461
V
-1,0
BOT
0,6.67966666666667
V
0,3.52001190185547
V
-1,0
BOT
0,6.68633333333333
V
0,3.69167327880859
V
-1,0
BOT
0,6.693
V
0,3.86762619018555
V
-1,0
BOT
0,6.69966666666667
V
0,4.04500961303711
V
-1,0
BOT
0,6.70633333333333
V
0,4.22477722167969
V
-1,0
BOT
0,6.713
V
0,4.40454483032227
V
-1,0
BOT
0,6.71966666666667
V
0,4.57620620727539
V
-1,0
BOT
0,6.72633333333333
V
0,4.73594665527344
V
-1,0
BOT
0,6.733
V
0,4.88376617431641
V
-1,0
BOT
0,6.73966666666667
V
0,5.01728057861328
V
-1,0
BOT
0,6.74633333333333
V
0,5.13267517089844
V
-1,0
BOT
0,6.753
V
0,5.22613525390625
V
-1,0
BOT
0,6.75966666666667
V
0,5.30099868774414
V
-1,0
BOT
0,6.76633333333333
V
0,5.35964965820313
V
-1,0
BOT
0,6.773
V
0,5.4020881652832
V
-1,0
BOT
0,6.77966666666667
V
0,5.42640686035156
V
-1,0
BOT
0,6.78633333333333
V
0,5.43117523193359
V
-1,0
BOT
0,6.793
V
0,5.41782379150391
V
-1,0
BOT
0,6.79966666666667
V
0,5.38873672485352
V
-1,0
BOT
0,6.80633333333334
V
0,5.34296035766602
V
-1,0
BOT
0,6.813
V
0,5.28192520141602
V
-1,0
BOT
0,6.81966666666667
V
0,5.20849227905273
V
-1,0
BOT
0,6.82633333333333
V
0,5.12552261352539
V
-1,0
BOT
0,6.833
V
0,5.03683090209961
V
-1,0
BOT
0,6.83966666666667
V
0,4.94241714477539
V
-1,0
BOT
0,6.84633333333333
V
0,4.84466552734375
V
-1,0
BOT
0,6.853
V
0,4.7450065612793
V
-1,0
BOT
0,6.85966666666667
V
0,4.64534759521484
V
-1,0
BOT
0,6.86633333333333
V
0,4.54807281494141
V
-1,0
BOT
0,6.873
V
0,4.45365905761719
V
-1,0
BOT
0,6.87966666666667
V
0,4.36115264892578
V
-1,0
BOT
0,6.88633333333333
V
0,4.27007675170898
V
-1,0
BOT
0,6.893
V
0,4.18233871459961
V
-1,0
BOT
0,6.89966666666667
V
0,4.10032272338867
V
-1,0
BOT
0,6.90633333333333
V
0,4.02164459228516
V
-1,0
BOT
0,6.913
V
0,3.94582748413086
V
-1,0
BOT
0,6.91966666666667
V
0,3.87287139892578
V
-1,0
BOT
0,6.92633333333333
V
0,3.80325317382812
V
-1,0
BOT
0,6.933
V
0,3.73601913452148
V
-1,0
BOT
0,6.93966666666667
V
0,3.67355346679687
V
-1,0
BOT
0,6.94633333333333
V
0,3.61537933349609
V
-1,0
BOT
0,6.953
V
0,3.56054306030273
V
-1,0
BOT
0,6.95966666666667
V
0,3.50856781005859
V
-1,0
BOT
0,6.96633333333333
V
0,3.46088409423828
V
-1,0
BOT
0,6.973
V
0,3.41653823852539
V
-1,0
BOT
0,6.97966666666667
V
0,3.37076187133789
V
-1,0
BOT
0,6.98633333333333
V
0,3.32498550415039
V
-1,0
BOT
0,6.993
V
0,3.2811164855957
V
-1,0
BOT
0,6.99966666666667
V
0,3.23963165283203
V
-1,0
BOT
0,7.00633333333333
V
0,3.19862365722656
V
-1,0
BOT
0,7.013
V
0,3.15761566162109
V
-1,0
BOT
0,7.01966666666667
V
0,3.11851501464844
V
-1,0
BOT
0,7.02633333333333
V
0,3.08132171630859
V
-1,0
BOT
0,7.033
V
0,3.04508209228516
V
-1,0
BOT
0,7.03966666666667
V
0,3.00788879394531
V
-1,0
BOT
0,7.04633333333333
V
0,2.96926498413086
V
-1,0
BOT
0,7.053
V
0,2.9292106628418
V
-1,0
BOT
0,7.05966666666667
V
0,2.88534164428711
V
-1,0
BOT
0,7.06633333333333
V
0,2.83908843994141
V
-1,0
BOT
0,7.073
V
0,2.78902053833008
V
-1,0
BOT
0,7.07966666666667
V
0,2.73561477661133
V
-1,0
BOT
0,7.08633333333333
V
0,2.68268585205078
V
-1,0
BOT
0,7.093
V
0,2.63309478759766
V
-1,0
BOT
0,7.09966666666667
V
0,2.58541107177734
V
-1,0
BOT
0,7.10633333333333
V
0,2.53915786743164
V
-1,0
BOT
0,7.113
V
0,2.49433517456055
V
-1,0
BOT
0,7.11966666666667
V
0,2.45189666748047
V
-1,0
BOT
0,7.12633333333333
V
0,2.410888671875
V
-1,0
BOT
0,7.133
V
0,2.36797332763672
V
-1,0
BOT
0,7.13966666666667
V
0,2.32267379760742
V
-1,0
BOT
0,7.14633333333333
V
0,2.27737426757812
V
-1,0
BOT
0,7.153
V
0,2.23445892333984
V
-1,0
BOT
0,7.15966666666667
V
0,2.19202041625977
V
-1,0
BOT
0,7.16633333333333
V
0,2.14958190917969
V
-1,0
BOT
0,7.173
V
0,2.11095809936523
V
-1,0
BOT
0,7.17966666666667
V
0,2.07853317260742
V
-1,0
BOT
0,7.18633333333333
V
0,2.04944610595703
V
-1,0
BOT
0,7.193
V
0,2.02274322509766
V
-1,0
BOT
0,7.19966666666667
V
0,1.99699401855469
V
-1,0
BOT
0,7.20633333333333
V
0,1.97362899780273
V
-1,0
BOT
0,7.213
V
0,1.95074081420898
V
-1,0
BOT
0,7.21966666666667
V
0,1.92928314208984
V
-1,0
BOT
0,7.22633333333333
V
0,1.91164016723633
V
-1,0
BOT
0,7.233
V
0,1.89542770385742
V
-1,0
BOT
0,7.23966666666667
V
0,1.88207626342773
V
-1,0
BOT
0,7.24633333333333
V
0,1.87063217163086
V
-1,0
BOT
0,7.253
V
0,1.861572265625
V
-1,0
BOT
0,7.25966666666667
V
0,1.85251235961914
V
-1,0
BOT
0,7.26633333333333
V
0,1.84440612792969
V
-1,0
BOT
0,7.273
V
0,1.83916091918945
V
-1,0
BOT
0,7.27966666666667
V
0,1.83677673339844
V
-1,0
BOT
0,7.28633333333333
V
0,1.83677673339844
V
-1,0
BOT
0,7.293
V
0,1.83820724487305
V
-1,0
BOT
0,7.29966666666667
V
0,1.83820724487305
V
-1,0
BOT
0,7.30633333333333
V
0,1.83916091918945
V
-1,0
BOT
0,7.313
V
0,1.84202194213867
V
-1,0
BOT
0,7.31966666666667
V
0,1.84822082519531
V
-1,0
BOT
0,7.32633333333333
V
0,1.85775756835937
V
-1,0
BOT
0,7.333
V
0,1.87063217163086
V
-1,0
BOT
0,7.33966666666667
V
0,1.88875198364258
V
-1,0
BOT
0,7.34633333333333
V
0,1.91164016723633
V
-1,0
BOT
0,7.353
V
0,1.93977355957031
V
-1,0
BOT
0,7.35966666666667
V
0,1.97029113769531
V
-1,0
BOT
0,7.36633333333333
V
0,2.00605392456055
V
-1,0
BOT
0,7.373
V
0,2.04753875732422
V
-1,0
BOT
0,7.37966666666667
V
0,2.09617614746094
V
-1,0
BOT
0,7.38633333333333
V
0,2.14862823486328
V
-1,0
BOT
0,7.393
V
0,2.20346450805664
V
-1,0
BOT
0,7.39966666666667
V
0,2.26116180419922
V
-1,0
BOT
0,7.40633333333333
V
0,2.32362747192383
V
-1,0
BOT
0,7.413
V
0,2.38895416259766
V
-1,0
BOT
0,7.41966666666667
V
0,2.45380401611328
V
-1,0
BOT
0,7.42633333333333
V
0,2.51674652099609
V
-1,0
BOT
0,7.433
V
0,2.57730484008789
V
-1,0
BOT
0,7.43966666666667
V
0,2.63452529907227
V
-1,0
BOT
0,7.44633333333333
V
0,2.685546875
V
-1,0
BOT
0,7.453
V
0,2.7318000793457
V
-1,0
BOT
0,7.45966666666667
V
0,2.77233123779297
V
-1,0
BOT
0,7.46633333333333
V
0,2.80523300170898
V
-1,0
BOT
0,7.473
V
0,2.82955169677734
V
-1,0
BOT
0,7.47966666666667
V
0,2.84481048583984
V
-1,0
BOT
0,7.48633333333333
V
0,2.85148620605469
V
-1,0
BOT
0,7.493
V
0,2.84767150878906
V
-1,0
BOT
0,7.49966666666667
V
0,2.83622741699219
V
-1,0
BOT
0,7.50633333333333
V
0,2.81953811645508
V
-1,0
BOT
0,7.513
V
0,2.79664993286133
V
-1,0
BOT
0,7.51966666666667
V
0,2.76899337768555
V
-1,0
BOT
0,7.52633333333333
V
0,2.73418426513672
V
-1,0
BOT
0,7.533
V
0,2.69508361816406
V
-1,0
BOT
0,7.53966666666667
V
0,2.65121459960937
V
-1,0
BOT
0,7.54633333333333
V
0,2.60305404663086
V
-1,0
BOT
0,7.553
V
0,2.55107879638672
V
-1,0
BOT
0,7.55966666666667
V
0,2.49671936035156
V
-1,0
BOT
0,7.56633333333333
V
0,2.4409294128418
V
-1,0
BOT
0,7.573
V
0,2.38418579101562
V
-1,0
BOT
0,7.57966666666667
V
0,2.32791900634766
V
-1,0
BOT
0,7.58633333333333
V
0,2.27069854736328
V
-1,0
BOT
0,7.593
V
0,2.21395492553711
V
-1,0
BOT
0,7.59966666666667
V
0,2.15721130371094
V
-1,0
BOT
0,7.60633333333333
V
0,2.10237503051758
V
-1,0
BOT
0,7.613
V
0,2.04896926879883
V
-1,0
BOT
0,7.61966666666667
V
0,1.99556350708008
V
-1,0
BOT
0,7.62633333333333
V
0,1.94501876831055
V
-1,0
BOT
0,7.633
V
0,1.89733505249023
V
-1,0
BOT
0,7.63966666666667
V
0,1.85251235961914
V
-1,0
BOT
0,7.64633333333333
V
0,1.80816650390625
V
-1,0
BOT
0,7.653
V
0,1.76572799682617
V
-1,0
BOT
0,7.65966666666667
V
0,1.72710418701172
V
-1,0
BOT
0,7.66633333333333
V
0,1.69038772583008
V
-1,0
BOT
0,7.673
V
0,1.65462493896484
V
-1,0
BOT
0,7.67966666666667
V
0,1.61838531494141
V
-1,0
BOT
0,7.68633333333333
V
0,1.58262252807617
V
-1,0
BOT
0,7.693
V
0,1.54924392700195
V
-1,0
BOT
0,7.69966666666667
V
0,1.51824951171875
V
-1,0
BOT
0,7.70633333333333
V
0,1.48868560791016
V
-1,0
BOT
0,7.713
V
0,1.46055221557617
V
-1,0
BOT
0,7.71966666666667
V
0,1.43718719482422
V
-1,0
BOT
0,7.72633333333333
V
0,1.41763687133789
V
-1,0
BOT
0,7.733
V
0,1.39665603637695
V
-1,0
BOT
0,7.73966666666667
V
0,1.37186050415039
V
-1,0
BOT
0,7.74633333333333
V
0,1.34706497192383
V
-1,0
BOT
0,7.753
V
0,1.32608413696289
V
-1,0
BOT
0,7.75966666666667
V
0,1.30510330200195
V
-1,0
BOT
0,7.76633333333333
V
0,1.28316879272461
V
-1,0
BOT
0,7.773
V
0,1.26123428344727
V
-1,0
BOT
0,7.77966666666667
V
0,1.23977661132812
V
-1,0
BOT
0,7.78633333333333
V
0,1.21736526489258
V
-1,0
BOT
0,7.793
V
0,1.19256973266602
V
-1,0
BOT
0,7.79966666666667
V
0,1.16777420043945
V
-1,0
BOT
0,7.80633333333334
V
0,1.1444091796875
V
-1,0
BOT
0,7.813
V
0,1.12247467041016
V
-1,0
BOT
0,7.81966666666667
V
0,1.10292434692383
V
-1,0
BOT
0,7.82633333333333
V
0,1.0838508605957
V
-1,0
BOT
0,7.833
V
0,1.06382369995117
V
-1,0
BOT
0,7.83966666666667
V
0,1.04379653930664
V
-1,0
BOT
0,7.84633333333333
V
0,1.0223388671875
V
-1,0
BOT
0,7.853
V
0,1.00040435791016
V
-1,0
BOT
0,7.85966666666667
V
0,0.979900360107422
V
-1,0
BOT
0,7.86633333333333
V
0,0.961780548095703
V
-1,0
BOT
0,7.873
V
0,0.949382781982422
V
-1,0
BOT
0,7.87966666666667
V
0,0.942230224609375
V
-1,0
BOT
0,7.88633333333334
V
0,0.940322875976563
V
-1,0
BOT
0,7.893
V
0,0.942230224609375
V
-1,0
BOT
0,7.89966666666667
V
0,0.948905944824219
V
-1,0
BOT
0,7.90633333333333
V
0,0.961780548095703
V
-1,0
BOT
0,7.913
V
0,0.978469848632813
V
-1,0
BOT
0,7.91966666666667
V
0,1.00088119506836
V
-1,0
BOT
0,7.92633333333333
V
0,1.02853775024414
V
-1,0
BOT
0,7.933
V
0,1.06334686279297
V
-1,0
BOT
0,7.93966666666667
V
0,1.10435485839844
V
-1,0
BOT
0,7.94633333333333
V
0,1.15013122558594
V
-1,0
BOT
0,7.953
V
0,1.20115280151367
V
-1,0
BOT
0,7.95966666666667
V
0,1.26028060913086
V
-1,0
BOT
0,7.96633333333333
V
0,1.32942199707031
V
-1,0
BOT
0,7.973
V
0,1.40905380249023
V
-1,0
BOT
0,7.97966666666667
V
0,1.50060653686523
V
-1,0
BOT
0,7.98633333333333
V
0,1.60312652587891
V
-1,0
BOT
0,7.993
V
0,1.71613693237305
V
-1,0
BOT
0,7.99966666666667
V
0,1.83820724487305
V
-1,0
BOT
0,8.00633333333333
V
0,1.96647644042969
V
-1,0
BOT
0,8.013
V
0,2.09999084472656
V
-1,0
BOT
0,8.01966666666667
V
0,2.23684310913086
V
-1,0
BOT
0,8.02633333333333
V
0,2.37703323364258
V
-1,0
BOT
0,8.033
V
0,2.52056121826172
V
-1,0
BOT
0,8.03966666666667
V
0,2.66599655151367
V
-1,0
BOT
0,8.04633333333333
V
0,2.81000137329102
V
-1,0
BOT
0,8.053
V
0,2.95066833496094
V
-1,0
BOT
0,8.05966666666667
V
0,3.08704376220703
V
-1,0
BOT
0,8.06633333333333
V
0,3.21817398071289
V
-1,0
BOT
0,8.073
V
0,3.34024429321289
V
-1,0
BOT
0,8.07966666666667
V
0,3.45182418823242
V
-1,0
BOT
0,8.08633333333333
V
0,3.55100631713867
V
-1,0
BOT
0,8.093
V
0,3.63826751708984
V
-1,0
BOT
0,8.09966666666667
V
0,3.71265411376953
V
-1,0
BOT
0,8.10633333333333
V
0,3.77273559570312
V
-1,0
BOT
0,8.113
V
0,3.81755828857422
V
-1,0
BOT
0,8.11966666666667
V
0,3.84902954101562
V
-1,0
BOT
0,8.12633333333333
V
0,3.86714935302734
V
-1,0
BOT
0,8.133
V
0,3.87287139892578
V
-1,0
BOT
0,8.13966666666667
V
0,3.86524200439453
V
-1,0
BOT
0,8.14633333333333
V
0,3.84616851806641
V
-1,0
BOT
0,8.153
V
0,3.81660461425781
V
-1,0
BOT
0,8.15966666666667
V
0,3.77559661865234
V
-1,0
BOT
0,8.16633333333333
V
0,3.72457504272461
V
-1,0
BOT
0,8.173
V
0,3.66544723510742
V
-1,0
BOT
0,8.17966666666667
V
0,3.59916687011719
V
-1,0
BOT
0,8.18633333333333
V
0,3.52382659912109
V
-1,0
BOT
0,8.193
V
0,3.44085693359375
V
-1,0
BOT
0,8.19966666666667
V
0,3.35311889648437
V
-1,0
BOT
0,8.20633333333333
V
0,3.26108932495117
V
-1,0
BOT
0,8.213
V
0,3.16381454467773
V
-1,0
BOT
0,8.21966666666667
V
0,3.06320190429687
V
-1,0
BOT
0,8.22633333333333
V
0,2.96258926391602
V
-1,0
BOT
0,8.233
V
0,2.86340713500977
V
-1,0
BOT
0,8.23966666666667
V
0,2.76422500610352
V
-1,0
BOT
0,8.24633333333333
V
0,2.66551971435547
V
-1,0
BOT
0,8.253
V
0,2.56776809692383
V
-1,0
BOT
0,8.25966666666667
V
0,2.47049331665039
V
-1,0
BOT
0,8.26633333333333
V
0,2.37417221069336
V
-1,0
BOT
0,8.273
V
0,2.27880477905273
V
-1,0
BOT
0,8.27966666666667
V
0,2.18534469604492
V
-1,0
BOT
0,8.28633333333333
V
0,2.09283828735352
V
-1,0
BOT
0,8.293
V
0,2.00462341308594
V
-1,0
BOT
0,8.29966666666667
V
0,1.9221305847168
V
-1,0
BOT
0,8.30633333333333
V
0,1.8458366394043
V
-1,0
BOT
0,8.313
V
0,1.77192687988281
V
-1,0
BOT
0,8.31966666666667
V
0,1.70087814331055
V
-1,0
BOT
0,8.32633333333333
V
0,1.63555145263672
V
-1,0
BOT
0,8.333
V
0,1.57451629638672
V
-1,0
BOT
0,8.33966666666667
V
0,1.51681900024414
V
-1,0
BOT
0,8.34633333333333
V
0,1.46007537841797
V
-1,0
BOT
0,8.353
V
0,1.4042854309082
V
-1,0
BOT
0,8.35966666666667
V
0,1.35135650634766
V
-1,0
BOT
0,8.36633333333333
V
0,1.30128860473633
V
-1,0
BOT
0,8.373
V
0,1.25551223754883
V
-1,0
BOT
0,8.37966666666667
V
0,1.21402740478516
V
-1,0
BOT
0,8.38633333333333
V
0,1.17731094360352
V
-1,0
BOT
0,8.393
V
0,1.14631652832031
V
-1,0
BOT
0,8.39966666666667
V
0,1.11961364746094
V
-1,0
BOT
0,8.40633333333333
V
0,1.09577178955078
V
-1,0
BOT
0,8.413
V
0,1.07240676879883
V
-1,0
BOT
0,8.41966666666667
V
0,1.04761123657227
V
-1,0
BOT
0,8.42633333333333
V
0,1.0218620300293
V
-1,0
BOT
0,8.433
V
0,0.997543334960938
V
-1,0
BOT
0,8.43966666666667
V
0,0.976085662841797
V
-1,0
BOT
0,8.44633333333333
V
0,0.957012176513672
V
-1,0
BOT
0,8.453
V
0,0.939369201660156
V
-1,0
BOT
0,8.45966666666667
V
0,0.926494598388672
V
-1,0
BOT
0,8.46633333333333
V
0,0.918388366699219
V
-1,0
BOT
0,8.473
V
0,0.911235809326172
V
-1,0
BOT
0,8.47966666666667
V
0,0.901222229003906
V
-1,0
BOT
0,8.48633333333333
V
0,0.889301300048828
V
-1,0
BOT
0,8.493
V
0,0.875473022460938
V
-1,0
BOT
0,8.49966666666667
V
0,0.860214233398438
V
-1,0
BOT
0,8.50633333333333
V
0,0.842094421386719
V
-1,0
BOT
0,8.513
V
0,0.825881958007813
V
-1,0
BOT
0,8.51966666666667
V
0,0.814914703369141
V
-1,0
BOT
0,8.52633333333333
V
0,0.807762145996094
V
-1,0
BOT
0,8.533
V
0,0.800132751464844
V
-1,0
BOT
0,8.53966666666667
V
0,0.791549682617188
V
-1,0
BOT
0,8.54633333333333
V
0,0.783920288085938
V
-1,0
BOT
0,8.553
V
0,0.779151916503906
V
-1,0
BOT
0,8.55966666666667
V
0,0.774383544921875
V
-1,0
BOT
0,8.56633333333333
V
0,0.768184661865234
V
-1,0
BOT
0,8.573
V
0,0.761508941650391
V
-1,0
BOT
0,8.57966666666667
V
0,0.754356384277344
V
-1,0
BOT
0,8.58633333333333
V
0,0.746726989746094
V
-1,0
BOT
0,8.593
V
0,0.736713409423828
V
-1,0
BOT
0,8.59966666666667
V
0,0.722408294677734
V
-1,0
BOT
0,8.60633333333333
V
0,0.708580017089844
V
-1,0
BOT
0,8.613
V
0,0.697612762451172
V
-1,0
BOT
0,8.61966666666667
V
0,0.689029693603516
V
-1,0
BOT
0,8.62633333333333
V
0,0.680446624755859
V
-1,0
BOT
0,8.633
V
0,0.669956207275391
V
-1,0
BOT
0,8.63966666666667
V
0,0.658512115478516
V
-1,0
BOT
0,8.64633333333333
V
0,0.645637512207031
V
-1,0
BOT
0,8.653
V
0,0.629425048828125
V
-1,0
BOT
0,8.65966666666667
V
0,0.610828399658203
V
-1,0
BOT
0,8.66633333333333
V
0,0.588893890380859
V
-1,0
BOT
0,8.673
V
0,0.562667846679688
V
-1,0
BOT
0,8.67966666666667
V
0,0.534534454345703
V
-1,0
BOT
0,8.68633333333333
V
0,0.507354736328125
V
-1,0
BOT
0,8.693
V
0,0.482082366943359
V
-1,0
BOT
0,8.69966666666667
V
0,0.457763671875
V
-1,0
BOT
0,8.70633333333333
V
0,0.437259674072266
V
-1,0
BOT
0,8.713
V
0,0.421047210693359
V
-1,0
BOT
0,8.71966666666667
V
0,0.408172607421875
V
-1,0
BOT
0,8.72633333333333
V
0,0.391960144042969
V
-1,0
BOT
0,8.733
V
0,0.371932983398437
V
-1,0
BOT
0,8.73966666666667
V
0,0.349044799804687
V
-1,0
BOT
0,8.74633333333333
V
0,0.323772430419922
V
-1,0
BOT
0,8.753
V
0,0.298023223876953
V
-1,0
BOT
0,8.75966666666667
V
0,0.273227691650391
V
-1,0
BOT
0,8.76633333333333
V
0,0.250816345214844
V
-1,0
BOT
0,8.773
V
0,0.230312347412109
V
-1,0
BOT
0,8.77966666666667
V
0,0.211238861083984
V
-1,0
BOT
0,8.78633333333333
V
0,0.192165374755859
V
-1,0
BOT
0,8.793
V
0,0.171661376953125
V
-1,0
BOT
0,8.79966666666667
V
0,0.151634216308594
V
-1,0
BOT
0,8.80633333333333
V
0,0.133514404296875
V
-1,0
BOT
0,8.813
V
0,0.119209289550781
V
-1,0
BOT
0,8.81966666666667
V
0,0.105381011962891
V
-1,0
BOT
0,8.82633333333333
V
0,0.0934600830078125
V
-1,0
BOT
0,8.833
V
0,0.0844001770019531
V
-1,0
BOT
0,8.83966666666667
V
0,0.0777244567871094
V
-1,0
BOT
0,8.84633333333333
V
0,0.0705718994140625
V
-1,0
BOT
0,8.853
V
0,0.0619888305664063
V
-1,0
BOT
0,8.85966666666667
V
0,0.0562667846679688
V
-1,0
BOT
0,8.86633333333333
V
0,0.0529289245605469
V
-1,0
BOT
0,8.873
V
0,0.0481605529785156
V
-1,0
BOT
0,8.87966666666667
V
0,0.0410079956054688
V
-1,0
BOT
0,8.88633333333333
V
0,0.0338554382324219
V
-1,0
BOT
0,8.893
V
0,0.0290870666503906
V
-1,0
BOT
0,8.89966666666667
V
0,0.0252723693847656
V
-1,0
BOT
0,8.90633333333333
V
0,0.02288818359375
V
-1,0
BOT
0,8.913
V
0,0.0233650207519531
V
-1,0
BOT
0,8.91966666666667
V
0,0.0276565551757812
V
-1,0
BOT
0,8.92633333333333
V
0,0.0333786010742187
V
-1,0
BOT
0,8.933
V
0,0.0357627868652344
V
-1,0
BOT
0,8.93966666666667
V
0,0.0367164611816406
V
-1,0
BOT
0,8.94633333333333
V
0,0.0391006469726562
V
-1,0
BOT
0,8.953
V
0,0.0433921813964844
V
-1,0
BOT
0,8.95966666666667
V
0,0.049591064453125
V
-1,0
BOT
0,8.96633333333333
V
0,0.0557899475097656
V
-1,0
BOT
0,8.973
V
0,0.0638961791992188
V
-1,0
BOT
0,8.97966666666667
V
0,0.0748634338378906
V
-1,0
BOT
0,8.98633333333333
V
0,0.0863075256347656
V
-1,0
BOT
0,8.993
V
0,0.0972747802734375
V
-1,0
BOT
0,8.99966666666667
V
0,0.107288360595703
V
-1,0
BOT
0,9.00633333333333
V
0,0.120639801025391
V
-1,0
BOT
0,9.013
V
0,0.1373291015625
V
-1,0
BOT
0,9.01966666666667
V
0,0.154018402099609
V
-1,0
BOT
0,9.02633333333333
V
0,0.169277191162109
V
-1,0
BOT
0,9.033
V
0,0.184535980224609
V
-1,0
BOT
0,9.03966666666667
V
0,0.201702117919922
V
-1,0
BOT
0,9.04633333333333
V
0,0.218391418457031
V
-1,0
BOT
0,9.053
V
0,0.234603881835937
V
-1,0
BOT
0,9.05966666666667
V
0,0.252246856689453
V
-1,0
BOT
0,9.06633333333333
V
0,0.269889831542969
V
-1,0
BOT
0,9.073
V
0,0.287532806396484
V
-1,0
BOT
0,9.07966666666667
V
0,0.30517578125
V
-1,0
BOT
0,9.08633333333333
V
0,0.321388244628906
V
-1,0
BOT
0,9.093
V
0,0.337123870849609
V
-1,0
BOT
0,9.09966666666667
V
0,0.351905822753906
V
-1,0
BOT
0,9.10633333333333
V
0,0.368118286132812
V
-1,0
BOT
0,9.113
V
0,0.385284423828125
V
-1,0
BOT
0,9.11966666666667
V
0,0.402450561523438
V
-1,0
BOT
0,9.12633333333333
V
0,0.418663024902344
V
-1,0
BOT
0,9.133
V
0,0.434398651123047
V
-1,0
BOT
0,9.13966666666667
V
0,0.449657440185547
V
-1,0
BOT
0,9.14633333333333
V
0,0.463485717773438
V
-1,0
BOT
0,9.153
V
0,0.476837158203125
V
-1,0
BOT
0,9.15966666666667
V
0,0.490665435791016
V
-1,0
BOT
0,9.16633333333333
V
0,0.508308410644531
V
-1,0
BOT
0,9.173
V
0,0.528335571289063
V
-1,0
BOT
0,9.17966666666667
V
0,0.552177429199219
V
-1,0
BOT
0,9.18633333333333
V
0,0.577449798583984
V
-1,0
BOT
0,9.193
V
0,0.601768493652344
V
-1,0
BOT
0,9.19966666666667
V
0,0.621795654296875
V
-1,0
BOT
0,9.20633333333333
V
0,0.637054443359375
V
-1,0
BOT
0,9.213
V
0,0.651359558105469
V
-1,0
BOT
0,9.21966666666667
V
0,0.665664672851563
V
-1,0
BOT
0,9.22633333333333
V
0,0.678062438964844
V
-1,0
BOT
0,9.233
V
0,0.688076019287109
V
-1,0
BOT
0,9.23966666666667
V
0,0.697612762451172
V
-1,0
BOT
0,9.24633333333333
V
0,0.707149505615234
V
-1,0
BOT
0,9.253
V
0,0.715255737304688
V
-1,0
BOT
0,9.25966666666667
V
0,0.720977783203125
V
-1,0
BOT
0,9.26633333333333
V
0,0.725746154785156
V
-1,0
BOT
0,9.273
V
0,0.731468200683594
V
-1,0
BOT
0,9.27966666666667
V
0,0.738620758056641
V
-1,0
BOT
0,9.28633333333333
V
0,0.743865966796875
V
-1,0
BOT
0,9.293
V
0,0.745296478271484
V
-1,0
BOT
0,9.29966666666667
V
0,0.743389129638672
V
-1,0
BOT
0,9.30633333333333
V
0,0.738620758056641
V
-1,0
BOT
0,9.313
V
0,0.730991363525391
V
-1,0
BOT
0,9.31966666666667
V
0,0.721931457519531
V
-1,0
BOT
0,9.32633333333333
V
0,0.713348388671875
V
-1,0
BOT
0,9.333
V
0,0.706195831298828
V
-1,0
BOT
0,9.33966666666667
V
0,0.697612762451172
V
-1,0
BOT
0,9.34633333333333
V
0,0.687122344970703
V
-1,0
BOT
0,9.353
V
0,0.676155090332031
V
-1,0
BOT
0,9.35966666666667
V
0,0.664234161376953
V
-1,0
BOT
0,9.36633333333333
V
0,0.650882720947266
V
-1,0
BOT
0,9.373
V
0,0.634670257568359
V
-1,0
BOT
0,9.37966666666667
V
0,0.617027282714844
V
-1,0
BOT
0,9.38633333333333
V
0,0.599861145019531
V
-1,0
BOT
0,9.393
V
0,0.582695007324219
V
-1,0
BOT
0,9.39966666666667
V
0,0.562667846679688
V
-1,0
BOT
0,9.40633333333333
V
0,0.541210174560547
V
-1,0
BOT
0,9.413
V
0,0.521183013916016
V
-1,0
BOT
0,9.41966666666667
V
0,0.5035400390625
V
-1,0
BOT
0,9.42633333333333
V
0,0.486373901367188
V
-1,0
BOT
0,9.433
V
0,0.469207763671875
V
-1,0
BOT
0,9.43966666666667
V
0,0.452518463134766
V
-1,0
BOT
0,9.44633333333333
V
0,0.432968139648438
V
-1,0
BOT
0,9.453
V
0,0.410079956054688
V
-1,0
BOT
0,9.45966666666667
V
0,0.384807586669922
V
-1,0
BOT
0,9.46633333333333
V
0,0.360488891601562
V
-1,0
BOT
0,9.473
V
0,0.335693359375
V
-1,0
BOT
0,9.47966666666667
V
0,0.310420989990234
V
-1,0
BOT
0,9.48633333333333
V
0,0.287055969238281
V
-1,0
BOT
0,9.493
V
0,0.265598297119141
V
-1,0
BOT
0,9.49966666666667
V
0,0.246524810791016
V
-1,0
BOT
0,9.50633333333333
V
0,0.226497650146484
V
-1,0
BOT
0,9.513
V
0,0.207901000976562
V
-1,0
BOT
0,9.51966666666667
V
0,0.190258026123047
V
-1,0
BOT
0,9.52633333333333
V
0,0.17547607421875
V
-1,0
BOT
0,9.533
V
0,0.160694122314453
V
-1,0
BOT
0,9.53966666666667
V
0,0.14495849609375
V
-1,0
BOT
0,9.54633333333333
V
0,0.130176544189453
V
-1,0
BOT
0,9.553
V
0,0.114917755126953
V
-1,0
BOT
0,9.55966666666667
V
0,0.101089477539062
V
-1,0
BOT
0,9.56633333333333
V
0,0.0901222229003906
V
-1,0
BOT
0,9.573
V
0,0.080108642578125
V
-1,0
BOT
0,9.57966666666667
V
0,0.0729560852050781
V
-1,0
BOT
0,9.58633333333333
V
0,0.0700950622558594
V
-1,0
BOT
0,9.593
V
0,0.0743865966796875
V
-1,0
BOT
0,9.59966666666667
V
0,0.0815391540527344
V
-1,0
BOT
0,9.60633333333333
V
0,0.0896453857421875
V
-1,0
BOT
0,9.613
V
0,0.09918212890625
V
-1,0
BOT
0,9.61966666666667
V
0,0.111579895019531
V
-1,0
BOT
0,9.62633333333333
V
0,0.122547149658203
V
-1,0
BOT
0,9.633
V
0,0.130653381347656
V
-1,0
BOT
0,9.63966666666667
V
0,0.139236450195312
V
-1,0
BOT
0,9.64633333333333
V
0,0.150680541992187
V
-1,0
BOT
0,9.653
V
0,0.1678466796875
V
-1,0
BOT
0,9.65966666666667
V
0,0.189781188964844
V
-1,0
BOT
0,9.66633333333333
V
0,0.217914581298828
V
-1,0
BOT
0,9.673
V
0,0.249862670898437
V
-1,0
BOT
0,9.67966666666667
V
0,0.284671783447266
V
-1,0
BOT
0,9.68633333333333
V
0,0.320911407470703
V
-1,0
BOT
0,9.693
V
0,0.356197357177734
V
-1,0
BOT
0,9.69966666666667
V
0,0.391483306884766
V
-1,0
BOT
0,9.70633333333333
V
0,0.425338745117188
V
-1,0
BOT
0,9.713
V
0,0.461578369140625
V
-1,0
BOT
0,9.71966666666667
V
0,0.500679016113281
V
-1,0
BOT
0,9.72633333333333
V
0,0.544071197509766
V
-1,0
BOT
0,9.733
V
0,0.589370727539063
V
-1,0
BOT
0,9.73966666666667
V
0,0.631332397460938
V
-1,0
BOT
0,9.74633333333333
V
0,0.669479370117188
V
-1,0
BOT
0,9.753
V
0,0.701904296875
V
-1,0
BOT
0,9.75966666666667
V
0,0.729084014892578
V
-1,0
BOT
0,9.76633333333333
V
0,0.751972198486328
V
-1,0
BOT
0,9.773
V
0,0.772476196289063
V
-1,0
BOT
0,9.77966666666667
V
0,0.792503356933594
V
-1,0
BOT
0,9.78633333333333
V
0,0.813484191894531
V
-1,0
BOT
0,9.793
V
0,0.835418701171875
V
-1,0
BOT
0,9.79966666666667
V
0,0.855922698974609
V
-1,0
BOT
0,9.80633333333333
V
0,0.870704650878906
V
-1,0
BOT
0,9.813
V
0,0.879764556884766
V
-1,0
BOT
0,9.81966666666667
V
0,0.885963439941406
V
-1,0
BOT
0,9.82633333333333
V
0,0.889778137207031
V
-1,0
BOT
0,9.833
V
0,0.890254974365234
V
-1,0
BOT
0,9.83966666666667
V
0,0.887393951416016
V
-1,0
BOT
0,9.84633333333333
V
0,0.885963439941406
V
-1,0
BOT
0,9.853
V
0,0.886440277099609
V
-1,0
BOT
0,9.85966666666667
V
0,0.885486602783203
V
-1,0
BOT
0,9.86633333333333
V
0,0.881671905517578
V
-1,0
BOT
0,9.873
V
0,0.875473022460938
V
-1,0
BOT
0,9.87966666666667
V
0,0.869274139404297
V
-1,0
BOT
0,9.88633333333333
V
0,0.861644744873047
V
-1,0
BOT
0,9.893
V
0,0.853061676025391
V
-1,0
BOT
0,9.89966666666667
V
0,0.841617584228516
V
-1,0
BOT
0,9.90633333333333
V
0,0.828742980957031
V
-1,0
BOT
0,9.913
V
0,0.815391540527344
V
-1,0
BOT
0,9.91966666666667
V
0,0.802040100097656
V
-1,0
BOT
0,9.92633333333333
V
0,0.787734985351563
V
-1,0
BOT
0,9.933
V
0,0.769615173339844
V
-1,0
BOT
0,9.93966666666667
V
0,0.749111175537109
V
-1,0
BOT
0,9.94633333333333
V
0,0.726699829101563
V
-1,0
BOT
0,9.953
V
0,0.703334808349609
V
-1,0
BOT
0,9.95966666666667
V
0,0.679969787597656
V
-1,0
BOT
0,9.96633333333333
V
0,0.655651092529297
V
-1,0
BOT
0,9.973
V
0,0.630855560302734
V
-1,0
BOT
0,9.97966666666667
V
0,0.606060028076172
V
-1,0
BOT
0,9.98633333333333
V
0,0.584602355957031
V
-1,0
BOT
0,9.993
V
0,0.5645751953125
V
-1,0
BOT
0,9.99966666666667
V
0,0.544548034667969
V
-1,0
BOT
0,10.0063333333333
V
0,0.523567199707031
V
-1,0
BOT
0,10.013
V
0,0.500679016113281
V
-1,0
BOT
0,10.0196666666667
V
0,0.476837158203125
V
-1,0
BOT
0,10.0263333333333
V
0,0.452995300292969
V
-1,0
BOT
0,10.033
V
0,0.430107116699219
V
-1,0
BOT
0,10.0396666666667
V
0,0.408172607421875
V
-1,0
BOT
0,10.0463333333333
V
0,0.383853912353516
V
-1,0
BOT
0,10.053
V
0,0.359535217285156
V
-1,0
BOT
0,10.0596666666667
V
0,0.336647033691406
V
-1,0
BOT
0,10.0663333333333
V
0,0.315189361572266
V
-1,0
BOT
0,10.073
V
0,0.292778015136719
V
-1,0
BOT
0,10.0796666666667
V
0,0.268936157226562
V
-1,0
BOT
0,10.0863333333333
V
0,0.247478485107422
V
-1,0
BOT
0,10.093
V
0,0.229358673095703
V
-1,0
BOT
0,10.0996666666667
V
0,0.214099884033203
V
-1,0
BOT
0,10.1063333333333
V
0,0.199317932128906
V
-1,0
BOT
0,10.113
V
0,0.184059143066406
V
-1,0
BOT
0,10.1196666666667
V
0,0.169754028320312
V
-1,0
BOT
0,10.1263333333333
V
0,0.158786773681641
V
-1,0
BOT
0,10.133
V
0,0.149250030517578
V
-1,0
BOT
0,10.1396666666667
V
0,0.140666961669922
V
-1,0
BOT
0,10.1463333333333
V
0,0.133514404296875
V
-1,0
BOT
0,10.153
V
0,0.12969970703125
V
-1,0
BOT
0,10.1596666666667
V
0,0.127315521240234
V
-1,0
BOT
0,10.1663333333333
V
0,0.124931335449219
V
-1,0
BOT
0,10.173
V
0,0.122547149658203
V
-1,0
BOT
0,10.1796666666667
V
0,0.119686126708984
V
-1,0
BOT
0,10.1863333333333
V
0,0.116825103759766
V
-1,0
BOT
0,10.193
V
0,0.113964080810547
V
-1,0
BOT
0,10.1996666666667
V
0,0.110626220703125
V
-1,0
BOT
0,10.2063333333333
V
0,0.1068115234375
V
-1,0
BOT
0,10.213
V
0,0.103950500488281
V
-1,0
BOT
0,10.2196666666667
V
0,0.100612640380859
V
-1,0
BOT
0,10.2263333333333
V
0,0.0967979431152344
V
-1,0
BOT
0,10.233
V
0,0.0944137573242188
V
-1,0
BOT
0,10.2396666666667
V
0,0.0934600830078125
V
-1,0
BOT
0,10.2463333333333
V
0,0.0934600830078125
V
-1,0
BOT
0,10.253
V
0,0.0948905944824219
V
-1,0
BOT
0,10.2596666666667
V
0,0.0977516174316406
V
-1,0
BOT
0,10.2663333333333
V
0,0.102043151855469
V
-1,0
BOT
0,10.273
V
0,0.103473663330078
V
-1,0
BOT
0,10.2796666666667
V
0,0.105857849121094
V
-1,0
BOT
0,10.2863333333333
V
0,0.108718872070312
V
-1,0
BOT
0,10.293
V
0,0.11444091796875
V
-1,0
BOT
0,10.2996666666667
V
0,0.121116638183594
V
-1,0
BOT
0,10.3063333333333
V
0,0.127315521240234
V
-1,0
BOT
0,10.313
V
0,0.135421752929687
V
-1,0
BOT
0,10.3196666666667
V
0,0.143051147460937
V
-1,0
BOT
0,10.3263333333333
V
0,0.153064727783203
V
-1,0
BOT
0,10.333
V
0,0.16021728515625
V
-1,0
BOT
0,10.3396666666667
V
0,0.168800354003906
V
-1,0
BOT
0,10.3463333333333
V
0,0.178337097167969
V
-1,0
BOT
0,10.353
V
0,0.187873840332031
V
-1,0
BOT
0,10.3596666666667
V
0,0.1983642578125
V
-1,0
BOT
0,10.3663333333333
V
0,0.210762023925781
V
-1,0
BOT
0,10.373
V
0,0.227451324462891
V
-1,0
BOT
0,10.3796666666667
V
0,0.245094299316406
V
-1,0
BOT
0,10.3863333333333
V
0,0.265121459960937
V
-1,0
BOT
0,10.393
V
0,0.286579132080078
V
-1,0
BOT
0,10.3996666666667
V
0,0.309944152832031
V
-1,0
BOT
0,10.4063333333333
V
0,0.330448150634766
V
-1,0
BOT
0,10.413
V
0,0.348567962646484
V
-1,0
BOT
0,10.4196666666667
V
0,0.368595123291016
V
-1,0
BOT
0,10.4263333333333
V
0,0.391960144042969
V
-1,0
BOT
0,10.433
V
0,0.416278839111328
V
-1,0
BOT
0,10.4396666666667
V
0,0.442028045654297
V
-1,0
BOT
0,10.4463333333333
V
0,0.470161437988281
V
-1,0
BOT
0,10.453
V
0,0.501155853271484
V
-1,0
BOT
0,10.4596666666667
V
0,0.5340576171875
V
-1,0
BOT
0,10.4663333333333
V
0,0.565528869628906
V
-1,0
BOT
0,10.473
V
0,0.597000122070313
V
-1,0
BOT
0,10.4796666666667
V
0,0.629901885986328
V
-1,0
BOT
0,10.4863333333333
V
0,0.668525695800781
V
-1,0
BOT
0,10.493
V
0,0.713348388671875
V
-1,0
BOT
0,10.4996666666667
V
0,0.761985778808594
V
-1,0
BOT
0,10.5063333333333
V
0,0.813484191894531
V
-1,0
BOT
0,10.513
V
0,0.868320465087891
V
-1,0
BOT
0,10.5196666666667
V
0,0.927925109863281
V
-1,0
BOT
0,10.5263333333333
V
0,0.989913940429688
V
-1,0
BOT
0,10.533
V
0,1.0533332824707
V
-1,0
BOT
0,10.5396666666667
V
0,1.11722946166992
V
-1,0
BOT
0,10.5463333333333
V
0,1.18494033813477
V
-1,0
BOT
0,10.553
V
0,1.25646591186523
V
-1,0
BOT
0,10.5596666666667
V
0,1.32894515991211
V
-1,0
BOT
0,10.5663333333333
V
0,1.40047073364258
V
-1,0
BOT
0,10.573
V
0,1.47247314453125
V
-1,0
BOT
0,10.5796666666667
V
0,1.54638290405273
V
-1,0
BOT
0,10.5863333333333
V
0,1.62315368652344
V
-1,0
BOT
0,10.593
V
0,1.70087814331055
V
-1,0
BOT
0,10.5996666666667
V
0,1.77907943725586
V
-1,0
BOT
0,10.6063333333333
V
0,1.85871124267578
V
-1,0
BOT
0,10.613
V
0,1.9373893737793
V
-1,0
BOT
0,10.6196666666667
V
0,2.01225280761719
V
-1,0
BOT
0,10.6263333333333
V
0,2.08139419555664
V
-1,0
BOT
0,10.633
V
0,2.14385986328125
V
-1,0
BOT
0,10.6396666666667
V
0,2.20060348510742
V
-1,0
BOT
0,10.6463333333333
V
0,2.25067138671875
V
-1,0
BOT
0,10.653
V
0,2.29454040527344
V
-1,0
BOT
0,10.6596666666667
V
0,2.33268737792969
V
-1,0
BOT
0,10.6663333333333
V
0,2.3651123046875
V
-1,0
BOT
0,10.673
V
0,2.39181518554687
V
-1,0
BOT
0,10.6796666666667
V
0,2.4113655090332
V
-1,0
BOT
0,10.6863333333333
V
0,2.42042541503906
V
-1,0
BOT
0,10.693
V
0,2.41994857788086
V
-1,0
BOT
0,10.6996666666667
V
0,2.4113655090332
V
-1,0
BOT
0,10.7063333333333
V
0,2.3951530456543
V
-1,0
BOT
0,10.713
V
0,2.37178802490234
V
-1,0
BOT
0,10.7196666666667
V
0,2.34270095825195
V
-1,0
BOT
0,10.7263333333333
V
0,2.31027603149414
V
-1,0
BOT
0,10.733
V
0,2.27451324462891
V
-1,0
BOT
0,10.7396666666667
V
0,2.23302841186523
V
-1,0
BOT
0,10.7463333333333
V
0,2.18582153320312
V
-1,0
BOT
0,10.753
V
0,2.13432312011719
V
-1,0
BOT
0,10.7596666666667
V
0,2.07805633544922
V
-1,0
BOT
0,10.7663333333333
V
0,2.01749801635742
V
-1,0
BOT
0,10.773
V
0,1.953125
V
-1,0
BOT
0,10.7796666666667
V
0,1.88875198364258
V
-1,0
BOT
0,10.7863333333333
V
0,1.82485580444336
V
-1,0
BOT
0,10.793
V
0,1.75952911376953
V
-1,0
BOT
0,10.7996666666667
V
0,1.68991088867187
V
-1,0
BOT
0,10.8063333333333
V
0,1.6169548034668
V
-1,0
BOT
0,10.813
V
0,1.54018402099609
V
-1,0
BOT
0,10.8196666666667
V
0,1.46055221557617
V
-1,0
BOT
0,10.8263333333333
V
0,1.37853622436523
V
-1,0
BOT
0,10.833
V
0,1.2965202331543
V
-1,0
BOT
0,10.8396666666667
V
0,1.21688842773437
V
-1,0
BOT
0,10.8463333333333
V
0,1.13773345947266
V
-1,0
BOT
0,10.853
V
0,1.06143951416016
V
-1,0
BOT
0,10.8596666666667
V
0,0.986099243164063
V
-1,0
BOT
0,10.8663333333333
V
0,0.913143157958984
V
-1,0
BOT
0,10.873
V
0,0.840663909912109
V
-1,0
BOT
0,10.8796666666667
V
0,0.771045684814453
V
-1,0
BOT
0,10.8863333333333
V
0,0.706195831298828
V
-1,0
BOT
0,10.893
V
0,0.644207000732422
V
-1,0
BOT
0,10.8996666666667
V
0,0.586032867431641
V
-1,0
BOT
0,10.9063333333333
V
0,0.530719757080078
V
-1,0
BOT
0,10.913
V
0,0.481128692626953
V
-1,0
BOT
0,10.9196666666667
V
0,0.435352325439453
V
-1,0
BOT
0,10.9263333333333
V
0,0.392913818359375
V
-1,0
BOT
0,10.933
V
0,0.357151031494141
V
-1,0
BOT
0,10.9396666666667
V
0,0.328540802001953
V
-1,0
BOT
0,10.9463333333333
V
0,0.307559967041016
V
-1,0
BOT
0,10.953
V
0,0.290393829345703
V
-1,0
BOT
0,10.9596666666667
V
0,0.279903411865234
V
-1,0
BOT
0,10.9663333333333
V
0,0.277042388916016
V
-1,0
BOT
0,10.973
V
0,0.279903411865234
V
-1,0
BOT
0,10.9796666666667
V
0,0.287055969238281
V
-1,0
BOT
0,10.9863333333333
V
0,0.299453735351562
V
-1,0
BOT
0,10.993
V
0,0.318050384521484
V
-1,0
BOT
0,10.9996666666667
V
0,0.344753265380859
V
-1,0
BOT
0,11.0063333333333
V
0,0.379562377929687
V
-1,0
BOT
0,11.013
V
0,0.420093536376953
V
-1,0
BOT
0,11.0196666666667
V
0,0.462055206298828
V
-1,0
BOT
0,11.0263333333333
V
0,0.505924224853516
V
-1,0
BOT
0,11.033
V
0,0.552654266357422
V
-1,0
BOT
0,11.0396666666667
V
0,0.599384307861328
V
-1,0
BOT
0,11.0463333333333
V
0,0.645637512207031
V
-1,0
BOT
0,11.053
V
0,0.692844390869141
V
-1,0
BOT
0,11.0596666666667
V
0,0.743389129638672
V
-1,0
BOT
0,11.0663333333333
V
0,0.792980194091797
V
-1,0
BOT
0,11.073
V
0,0.840663909912109
V
-1,0
BOT
0,11.0796666666667
V
0,0.885009765625
V
-1,0
BOT
0,11.0863333333333
V
0,0.927448272705078
V
-1,0
BOT
0,11.093
V
0,0.967502593994141
V
-1,0
BOT
0,11.0996666666667
V
0,1.00374221801758
V
-1,0
BOT
0,11.1063333333333
V
0,1.03950500488281
V
-1,0
BOT
0,11.113
V
0,1.07431411743164
V
-1,0
BOT
0,11.1196666666667
V
0,1.10530853271484
V
-1,0
BOT
0,11.1263333333333
V
0,1.13058090209961
V
-1,0
BOT
0,11.133
V
0,1.15013122558594
V
-1,0
BOT
0,11.1396666666667
V
0,1.16682052612305
V
-1,0
BOT
0,11.1463333333333
V
0,1.17921829223633
V
-1,0
BOT
0,11.153
V
0,1.18684768676758
V
-1,0
BOT
0,11.1596666666667
V
0,1.19304656982422
V
-1,0
BOT
0,11.1663333333333
V
0,1.20019912719727
V
-1,0
BOT
0,11.173
V
0,1.2054443359375
V
-1,0
BOT
0,11.1796666666667
V
0,1.20639801025391
V
-1,0
BOT
0,11.1863333333333
V
0,1.20210647583008
V
-1,0
BOT
0,11.193
V
0,1.19495391845703
V
-1,0
BOT
0,11.1996666666667
V
0,1.18494033813477
V
-1,0
BOT
0,11.2063333333333
V
0,1.17158889770508
V
-1,0
BOT
0,11.213
V
0,1.15680694580078
V
-1,0
BOT
0,11.2196666666667
V
0,1.14297866821289
V
-1,0
BOT
0,11.2263333333333
V
0,1.13248825073242
V
-1,0
BOT
0,11.233
V
0,1.12342834472656
V
-1,0
BOT
0,11.2396666666667
V
0,1.11532211303711
V
-1,0
BOT
0,11.2463333333333
V
0,1.10626220703125
V
-1,0
BOT
0,11.253
V
0,1.09529495239258
V
-1,0
BOT
0,11.2596666666667
V
0,1.08003616333008
V
-1,0
BOT
0,11.2663333333333
V
0,1.06143951416016
V
-1,0
BOT
0,11.273
V
0,1.04331970214844
V
-1,0
BOT
0,11.2796666666667
V
0,1.02710723876953
V
-1,0
BOT
0,11.2863333333333
V
0,1.01280212402344
V
-1,0
BOT
0,11.293
V
0,0.998973846435547
V
-1,0
BOT
0,11.2996666666667
V
0,0.983715057373047
V
-1,0
BOT
0,11.3063333333333
V
0,0.967025756835938
V
-1,0
BOT
0,11.313
V
0,0.946998596191406
V
-1,0
BOT
0,11.3196666666667
V
0,0.926494598388672
V
-1,0
BOT
0,11.3263333333333
V
0,0.906467437744141
V
-1,0
BOT
0,11.333
V
0,0.887870788574219
V
-1,0
BOT
0,11.3396666666667
V
0,0.872135162353516
V
-1,0
BOT
0,11.3463333333333
V
0,0.860214233398438
V
-1,0
BOT
0,11.353
V
0,0.850200653076172
V
-1,0
BOT
0,11.3596666666667
V
0,0.840187072753906
V
-1,0
BOT
0,11.3663333333333
V
0,0.831127166748047
V
-1,0
BOT
0,11.373
V
0,0.825881958007813
V
-1,0
BOT
0,11.3796666666667
V
0,0.826835632324219
V
-1,0
BOT
0,11.3863333333333
V
0,0.831127166748047
V
-1,0
BOT
0,11.393
V
0,0.838756561279297
V
-1,0
BOT
0,11.3996666666667
V
0,0.849723815917969
V
-1,0
BOT
0,11.4063333333333
V
0,0.86212158203125
V
-1,0
BOT
0,11.413
V
0,0.872135162353516
V
-1,0
BOT
0,11.4196666666667
V
0,0.882148742675781
V
-1,0
BOT
0,11.4263333333333
V
0,0.891685485839844
V
-1,0
BOT
0,11.433
V
0,0.901699066162109
V
-1,0
BOT
0,11.4396666666667
V
0,0.910758972167969
V
-1,0
BOT
0,11.4463333333333
V
0,0.921726226806641
V
-1,0
BOT
0,11.453
V
0,0.936508178710938
V
-1,0
BOT
0,11.4596666666667
V
0,0.952243804931641
V
-1,0
BOT
0,11.4663333333333
V
0,0.96893310546875
V
-1,0
BOT
0,11.473
V
0,0.986099243164063
V
-1,0
BOT
0,11.4796666666667
V
0,1.00421905517578
V
-1,0
BOT
0,11.4863333333333
V
0,1.01804733276367
V
-1,0
BOT
0,11.493
V
0,1.02472305297852
V
-1,0
BOT
0,11.4996666666667
V
0,1.02472305297852
V
-1,0
BOT
0,11.5063333333333
V
0,1.02090835571289
V
-1,0
BOT
0,11.513
V
0,1.01375579833984
V
-1,0
BOT
0,11.5196666666667
V
0,1.00326538085937
V
-1,0
BOT
0,11.5263333333333
V
0,0.992298126220703
V
-1,0
BOT
0,11.533
V
0,0.982761383056641
V
-1,0
BOT
0,11.5396666666667
V
0,0.974178314208984
V
-1,0
BOT
0,11.5463333333333
V
0,0.963211059570313
V
-1,0
BOT
0,11.553
V
0,0.948429107666016
V
-1,0
BOT
0,11.5596666666667
V
0,0.931262969970703
V
-1,0
BOT
0,11.5663333333333
V
0,0.911235809326172
V
-1,0
BOT
0,11.573
V
0,0.892162322998047
V
-1,0
BOT
0,11.5796666666667
V
0,0.872611999511719
V
-1,0
BOT
0,11.5863333333333
V
0,0.851631164550781
V
-1,0
BOT
0,11.593
V
0,0.828266143798828
V
-1,0
BOT
0,11.5996666666667
V
0,0.804901123046875
V
-1,0
BOT
0,11.6063333333333
V
0,0.781059265136719
V
-1,0
BOT
0,11.613
V
0,0.754833221435547
V
-1,0
BOT
0,11.6196666666667
V
0,0.726699829101563
V
-1,0
BOT
0,11.6263333333333
V
0,0.701427459716797
V
-1,0
BOT
0,11.633
V
0,0.679969787597656
V
-1,0
BOT
0,11.6396666666667
V
0,0.660419464111328
V
-1,0
BOT
0,11.6463333333333
V
0,0.643730163574219
V
-1,0
BOT
0,11.653
V
0,0.629425048828125
V
-1,0
BOT
0,11.6596666666667
V
0,0.617504119873047
V
-1,0
BOT
0,11.6663333333333
V
0,0.607967376708984
V
-1,0
BOT
0,11.673
V
0,0.600814819335938
V
-1,0
BOT
0,11.6796666666667
V
0,0.596046447753906
V
-1,0
BOT
0,11.6863333333333
V
0,0.593185424804688
V
-1,0
BOT
0,11.693
V
0,0.590324401855469
V
-1,0
BOT
0,11.6996666666667
V
0,0.584125518798828
V
-1,0
BOT
0,11.7063333333333
V
0,0.574111938476563
V
-1,0
BOT
0,11.713
V
0,0.559806823730469
V
-1,0
BOT
0,11.7196666666667
V
0,0.544071197509766
V
-1,0
BOT
0,11.7263333333333
V
0,0.525951385498047
V
-1,0
BOT
0,11.733
V
0,0.508308410644531
V
-1,0
BOT
0,11.7396666666667
V
0,0.494003295898438
V
-1,0
BOT
0,11.7463333333333
V
0,0.482559204101563
V
-1,0
BOT
0,11.753
V
0,0.4730224609375
V
-1,0
BOT
0,11.7596666666667
V
0,0.463008880615234
V
-1,0
BOT
0,11.7663333333333
V
0,0.452041625976563
V
-1,0
BOT
0,11.773
V
0,0.438213348388672
V
-1,0
BOT
0,11.7796666666667
V
0,0.421524047851563
V
-1,0
BOT
0,11.7863333333333
V
0,0.403404235839844
V
-1,0
BOT
0,11.793
V
0,0.385284423828125
V
-1,0
BOT
0,11.7996666666667
V
0,0.365257263183594
V
-1,0
BOT
0,11.8063333333333
V
0,0.342369079589844
V
-1,0
BOT
0,11.813
V
0,0.317573547363281
V
-1,0
BOT
0,11.8196666666667
V
0,0.292301177978516
V
-1,0
BOT
0,11.8263333333333
V
0,0.266551971435547
V
-1,0
BOT
0,11.833
V
0,0.239372253417969
V
-1,0
BOT
0,11.8396666666667
V
0,0.211238861083984
V
-1,0
BOT
0,11.8463333333333
V
0,0.185489654541016
V
-1,0
BOT
0,11.853
V
0,0.163555145263672
V
-1,0
BOT
0,11.8596666666667
V
0,0.143051147460937
V
-1,0
BOT
0,11.8663333333333
V
0,0.120162963867187
V
-1,0
BOT
0,11.873
V
0,0.0972747802734375
V
-1,0
BOT
0,11.8796666666667
V
0,0.0772476196289063
V
-1,0
BOT
0,11.8863333333333
V
0,0.0586509704589844
V
-1,0
BOT
0,11.893
V
0,0.0395774841308594
V
-1,0
BOT
0,11.8996666666667
V
0,0.0195503234863281
V
-1,0
BOT
0,11.9063333333333
V
0,0.00238418579101562
V
-1,0
BOT
0,11.913
V
0,-0.00905990600585938
V
-1,0
BOT
0,11.9196666666667
V
0,-0.0171661376953125
V
-1,0
BOT
0,11.9263333333333
V
0,-0.0271797180175781
V
-1,0
BOT
0,11.933
V
0,-0.03814697265625
V
-1,0
BOT
0,11.9396666666667
V
0,-0.0448226928710938
V
-1,0
BOT
0,11.9463333333333
V
0,-0.049591064453125
V
-1,0
BOT
0,11.953
V
0,-0.0553131103515625
V
-1,0
BOT
0,11.9596666666667
V
0,-0.0619888305664063
V
-1,0
BOT
0,11.9663333333333
V
0,-0.0662803649902344
V
-1,0
BOT
0,11.973
V
0,-0.0672340393066406
V
-1,0
BOT
0,11.9796666666667
V
0,-0.0677108764648438
V
-1,0
BOT
0,11.9863333333333
V
0,-0.0677108764648438
V
-1,0
BOT
0,11.993
V
0,-0.0667572021484375
V
-1,0
BOT
0,11.9996666666667
V
0,-0.0629425048828125
V
-1,0
BOT
0,12.0063333333333
V
0,-0.0567436218261719
V
-1,0
BOT
0,12.013
V
0,-0.0491142272949219
V
-1,0
BOT
0,12.0196666666667
V
0,-0.0410079956054688
V
-1,0
BOT
0,12.0263333333333
V
0,-0.0309944152832031
V
-1,0
BOT
0,12.033
V
0,-0.0209808349609375
V
-1,0
BOT
0,12.0396666666667
V
0,-0.0128746032714844
V
-1,0
BOT
0,12.0463333333333
V
0,-0.00619888305664063
V
-1,0
BOT
0,12.053
V
0,0.00238418579101562
V
-1,0
BOT
0,12.0596666666667
V
0,0.0147819519042969
V
-1,0
BOT
0,12.0663333333333
V
0,0.0286102294921875
V
-1,0
BOT
0,12.073
V
0,0.0438690185546875
V
-1,0
BOT
0,12.0796666666667
V
0,0.0591278076171875
V
-1,0
BOT
0,12.0863333333333
V
0,0.0743865966796875
V
-1,0
BOT
0,12.093
V
0,0.0905990600585938
V
-1,0
BOT
0,12.0996666666667
V
0,0.105381011962891
V
-1,0
BOT
0,12.1063333333333
V
0,0.116825103759766
V
-1,0
BOT
0,12.113
V
0,0.127315521240234
V
-1,0
BOT
0,12.1196666666667
V
0,0.139713287353516
V
-1,0
BOT
0,12.1263333333333
V
0,0.153541564941406
V
-1,0
BOT
0,12.133
V
0,0.164031982421875
V
-1,0
BOT
0,12.1396666666667
V
0,0.171184539794922
V
-1,0
BOT
0,12.1463333333333
V
0,0.177860260009766
V
-1,0
BOT
0,12.153
V
0,0.185012817382812
V
-1,0
BOT
0,12.1596666666667
V
0,0.191211700439453
V
-1,0
BOT
0,12.1663333333333
V
0,0.193595886230469
V
-1,0
BOT
0,12.173
V
0,0.193119049072266
V
-1,0
BOT
0,12.1796666666667
V
0,0.190258026123047
V
-1,0
BOT
0,12.1863333333333
V
0,0.184535980224609
V
-1,0
BOT
0,12.193
V
0,0.176429748535156
V
-1,0
BOT
0,12.1996666666667
V
0,0.164031982421875
V
-1,0
BOT
0,12.2063333333333
V
0,0.150203704833984
V
-1,0
BOT
0,12.213
V
0,0.135898590087891
V
-1,0
BOT
0,12.2196666666667
V
0,0.123023986816406
V
-1,0
BOT
0,12.2263333333333
V
0,0.108718872070312
V
-1,0
BOT
0,12.233
V
0,0.0920295715332031
V
-1,0
BOT
0,12.2396666666667
V
0,0.0743865966796875
V
-1,0
BOT
0,12.2463333333333
V
0,0.0567436218261719
V
-1,0
BOT
0,12.253
V
0,0.0400543212890625
V
-1,0
BOT
0,12.2596666666667
V
0,0.02288818359375
V
-1,0
BOT
0,12.2663333333333
V
0,0.00762939453125
V
-1,0
BOT
0,12.273
V
0,-0.00619888305664063
V
-1,0
BOT
0,12.2796666666667
V
0,-0.0171661376953125
V
-1,0
BOT
0,12.2863333333333
V
0,-0.0290870666503906
V
-1,0
BOT
0,12.293
V
0,-0.0410079956054688
V
-1,0
BOT
0,12.2996666666667
V
0,-0.0519752502441406
V
-1,0
BOT
0,12.3063333333333
V
0,-0.0619888305664063
V
-1,0
BOT
0,12.313
V
0,-0.0691413879394531
V
-1,0
BOT
0,12.3196666666667
V
0,-0.0743865966796875
V
-1,0
BOT
0,12.3263333333333
V
0,-0.0777244567871094
V
-1,0
BOT
0,12.333
V
0,-0.0782012939453125
V
-1,0
BOT
0,12.3396666666667
V
0,-0.0777244567871094
V
-1,0
BOT
0,12.3463333333333
V
0,-0.0748634338378906
V
-1,0
BOT
0,12.353
V
0,-0.0700950622558594
V
-1,0
BOT
0,12.3596666666667
V
0,-0.0629425048828125
V
-1,0
BOT
0,12.3663333333333
V
0,-0.0548362731933594
V
-1,0
BOT
0,12.373
V
0,-0.0438690185546875
V
-1,0
BOT
0,12.3796666666667
V
0,-0.0300407409667969
V
-1,0
BOT
0,12.3863333333333
V
0,-0.0157356262207031
V
-1,0
BOT
0,12.393
V
0,-0.000476837158203125
V
-1,0
BOT
0,12.3996666666667
V
0,0.0147819519042969
V
-1,0
BOT
0,12.4063333333333
V
0,0.030517578125
V
-1,0
BOT
0,12.413
V
0,0.0448226928710938
V
-1,0
BOT
0,12.4196666666667
V
0,0.0591278076171875
V
-1,0
BOT
0,12.4263333333333
V
0,0.0720024108886719
V
-1,0
BOT
0,12.433
V
0,0.0844001770019531
V
-1,0
BOT
0,12.4396666666667
V
0,0.0977516174316406
V
-1,0
BOT
0,12.4463333333333
V
0,0.110149383544922
V
-1,0
BOT
0,12.453
V
0,0.1220703125
V
-1,0
BOT
0,12.4596666666667
V
0,0.130176544189453
V
-1,0
BOT
0,12.4663333333333
V
0,0.136852264404297
V
-1,0
BOT
0,12.473
V
0,0.140666961669922
V
-1,0
BOT
0,12.4796666666667
V
0,0.142574310302734
V
-1,0
BOT
0,12.4863333333333
V
0,0.145435333251953
V
-1,0
BOT
0,12.493
V
0,0.147342681884766
V
-1,0
BOT
0,12.4996666666667
V
0,0.149250030517578
V
-1,0
BOT
0,12.5063333333333
V
0,0.148773193359375
V
-1,0
BOT
0,12.513
V
0,0.143527984619141
V
-1,0
BOT
0,12.5196666666667
V
0,0.132560729980469
V
-1,0
BOT
0,12.5263333333333
V
0,0.115394592285156
V
-1,0
BOT
0,12.533
V
0,0.0948905944824219
V
-1,0
BOT
0,12.5396666666667
V
0,0.072479248046875
V
-1,0
BOT
0,12.5463333333333
V
0,0.0486373901367188
V
-1,0
BOT
0,12.553
V
0,0.02288818359375
V
-1,0
BOT
0,12.5596666666667
V
0,-0.00286102294921875
V
-1,0
BOT
0,12.5663333333333
V
0,-0.0286102294921875
V
-1,0
BOT
0,12.573
V
0,-0.0538825988769531
V
-1,0
BOT
0,12.5796666666667
V
0,-0.0782012939453125
V
-1,0
BOT
0,12.5863333333333
V
0,-0.100135803222656
V
-1,0
BOT
0,12.593
V
0,-0.119686126708984
V
-1,0
BOT
0,12.5996666666667
V
0,-0.138282775878906
V
-1,0
BOT
0,12.6063333333333
V
0,-0.154972076416016
V
-1,0
BOT
0,12.613
V
0,-0.170230865478516
V
-1,0
BOT
0,12.6196666666667
V
0,-0.18310546875
V
-1,0
BOT
0,12.6263333333333
V
0,-0.195503234863281
V
-1,0
BOT
0,12.633
V
0,-0.20599365234375
V
-1,0
BOT
0,12.6396666666667
V
0,-0.212192535400391
V
-1,0
BOT
0,12.6463333333333
V
0,-0.213623046875
V
-1,0
BOT
0,12.653
V
0,-0.212192535400391
V
-1,0
BOT
0,12.6596666666667
V
0,-0.209808349609375
V
-1,0
BOT
0,12.6663333333333
V
0,-0.203609466552734
V
-1,0
BOT
0,12.673
V
0,-0.194549560546875
V
-1,0
BOT
0,12.6796666666667
V
0,-0.185966491699219
V
-1,0
BOT
0,12.6863333333333
V
0,-0.178337097167969
V
-1,0
BOT
0,12.693
V
0,-0.171184539794922
V
-1,0
BOT
0,12.6996666666667
V
0,-0.161647796630859
V
-1,0
BOT
0,12.7063333333333
V
0,-0.150680541992187
V
-1,0
BOT
0,12.713
V
0,-0.138282775878906
V
-1,0
BOT
0,12.7196666666667
V
0,-0.127315521240234
V
-1,0
BOT
0,12.7263333333333
V
0,-0.119686126708984
V
-1,0
BOT
0,12.733
V
0,-0.116348266601562
V
-1,0
BOT
0,12.7396666666667
V
0,-0.117301940917969
V
-1,0
BOT
0,12.7463333333333
V
0,-0.121593475341797
V
-1,0
BOT
0,12.753
V
0,-0.12969970703125
V
-1,0
BOT
0,12.7596666666667
V
0,-0.137805938720703
V
-1,0
BOT
0,12.7663333333333
V
0,-0.145435333251953
V
-1,0
BOT
0,12.773
V
0,-0.152111053466797
V
-1,0
BOT
0,12.7796666666667
V
0,-0.159263610839844
V
-1,0
BOT
0,12.7863333333333
V
0,-0.170707702636719
V
-1,0
BOT
0,12.793
V
0,-0.186443328857422
V
-1,0
BOT
0,12.7996666666667
V
0,-0.205039978027344
V
-1,0
BOT
0,12.8063333333333
V
0,-0.224590301513672
V
-1,0
BOT
0,12.813
V
0,-0.243663787841797
V
-1,0
BOT
0,12.8196666666667
V
0,-0.265121459960937
V
-1,0
BOT
0,12.8263333333333
V
0,-0.284671783447266
V
-1,0
BOT
0,12.833
V
0,-0.300884246826172
V
-1,0
BOT
0,12.8396666666667
V
0,-0.314235687255859
V
-1,0
BOT
0,12.8463333333333
V
0,-0.327587127685547
V
-1,0
BOT
0,12.853
V
0,-0.34332275390625
V
-1,0
BOT
0,12.8596666666667
V
0,-0.357627868652344
V
-1,0
BOT
0,12.8663333333333
V
0,-0.371932983398437
V
-1,0
BOT
0,12.873
V
0,-0.385284423828125
V
-1,0
BOT
0,12.8796666666667
V
0,-0.397682189941406
V
-1,0
BOT
0,12.8863333333333
V
0,-0.407218933105469
V
-1,0
BOT
0,12.893
V
0,-0.414371490478516
V
-1,0
BOT
0,12.8996666666667
V
0,-0.41961669921875
V
-1,0
BOT
0,12.9063333333333
V
0,-0.422954559326172
V
-1,0
BOT
0,12.913
V
0,-0.425338745117188
V
-1,0
BOT
0,12.9196666666667
V
0,-0.42724609375
V
-1,0
BOT
0,12.9263333333333
V
0,-0.425815582275391
V
-1,0
BOT
0,12.933
V
0,-0.419139862060547
V
-1,0
BOT
0,12.9396666666667
V
0,-0.409603118896484
V
-1,0
BOT
0,12.9463333333333
V
0,-0.396251678466797
V
-1,0
BOT
0,12.953
V
0,-0.379085540771484
V
-1,0
BOT
0,12.9596666666667
V
0,-0.35858154296875
V
-1,0
BOT
0,12.9663333333333
V
0,-0.335693359375
V
-1,0
BOT
0,12.973
V
0,-0.314712524414062
V
-1,0
BOT
0,12.9796666666667
V
0,-0.296115875244141
V
-1,0
BOT
0,12.9863333333333
V
0,-0.279426574707031
V
-1,0
BOT
0,12.993
V
0,-0.262260437011719
V
-1,0
BOT
0,12.9996666666667
V
0,-0.243663787841797
V
-1,0
BOT
0,13.0063333333333
V
0,-0.225067138671875
V
-1,0
BOT
0,13.013
V
0,-0.20599365234375
V
-1,0
BOT
0,13.0196666666667
V
0,-0.185012817382812
V
-1,0
BOT
0,13.0263333333333
V
0,-0.162601470947266
V
-1,0
BOT
0,13.033
V
0,-0.140190124511719
V
-1,0
BOT
0,13.0396666666667
V
0,-0.121116638183594
V
-1,0
BOT
0,13.0463333333333
V
0,-0.105857849121094
V
-1,0
BOT
0,13.053
V
0,-0.0920295715332031
V
-1,0
BOT
0,13.0596666666667
V
0,-0.0772476196289063
V
-1,0
BOT
0,13.0663333333333
V
0,-0.0600814819335938
V
-1,0
BOT
0,13.073
V
0,-0.0443458557128906
V
-1,0
BOT
0,13.0796666666667
V
0,-0.0286102294921875
V
-1,0
BOT
0,13.0863333333333
V
0,-0.0133514404296875
V
-1,0
BOT
0,13.093
V
0,0.00238418579101562
V
-1,0
BOT
0,13.0996666666667
V
0,0.0157356262207031
V
-1,0
BOT
0,13.1063333333333
V
0,0.0276565551757812
V
-1,0
BOT
0,13.113
V
0,0.0371932983398437
V
-1,0
BOT
0,13.1196666666667
V
0,0.0448226928710938
V
-1,0
BOT
0,13.1263333333333
V
0,0.0529289245605469
V
-1,0
BOT
0,13.133
V
0,0.0615119934082031
V
-1,0
BOT
0,13.1396666666667
V
0,0.0700950622558594
V
-1,0
BOT
0,13.1463333333333
V
0,0.0767707824707031
V
-1,0
BOT
0,13.153
V
0,0.0805854797363281
V
-1,0
BOT
0,13.1596666666667
V
0,0.0834465026855469
V
-1,0
BOT
0,13.1663333333333
V
0,0.08392333984375
V
-1,0
BOT
0,13.173
V
0,0.0815391540527344
V
-1,0
BOT
0,13.1796666666667
V
0,0.0753402709960938
V
-1,0
BOT
0,13.1863333333333
V
0,0.0677108764648438
V
-1,0
BOT
0,13.193
V
0,0.0581741333007813
V
-1,0
BOT
0,13.1996666666667
V
0,0.0457763671875
V
-1,0
BOT
0,13.2063333333333
V
0,0.0300407409667969
V
-1,0
BOT
0,13.213
V
0,0.0128746032714844
V
-1,0
BOT
0,13.2196666666667
V
0,-0.0057220458984375
V
-1,0
BOT
0,13.2263333333333
V
0,-0.0257492065429687
V
-1,0
BOT
0,13.233
V
0,-0.0505447387695313
V
-1,0
BOT
0,13.2396666666667
V
0,-0.0767707824707031
V
-1,0
BOT
0,13.2463333333333
V
0,-0.102519989013672
V
-1,0
BOT
0,13.253
V
0,-0.129222869873047
V
-1,0
BOT
0,13.2596666666667
V
0,-0.156879425048828
V
-1,0
BOT
0,13.2663333333333
V
0,-0.184535980224609
V
-1,0
BOT
0,13.273
V
0,-0.210285186767578
V
-1,0
BOT
0,13.2796666666667
V
0,-0.235080718994141
V
-1,0
BOT
0,13.2863333333333
V
0,-0.261306762695312
V
-1,0
BOT
0,13.293
V
0,-0.290393829345703
V
-1,0
BOT
0,13.2996666666667
V
0,-0.323772430419922
V
-1,0
BOT
0,13.3063333333333
V
0,-0.360012054443359
V
-1,0
BOT
0,13.313
V
0,-0.396251678466797
V
-1,0
BOT
0,13.3196666666667
V
0,-0.433444976806641
V
-1,0
BOT
0,13.3263333333333
V
0,-0.469684600830078
V
-1,0
BOT
0,13.333
V
0,-0.502586364746094
V
-1,0
BOT
0,13.3396666666667
V
0,-0.533580780029297
V
-1,0
BOT
0,13.3463333333333
V
0,-0.562667846679688
V
-1,0
BOT
0,13.353
V
0,-0.591754913330078
V
-1,0
BOT
0,13.3596666666667
V
0,-0.621318817138672
V
-1,0
BOT
0,13.3663333333333
V
0,-0.649929046630859
V
-1,0
BOT
0,13.373
V
0,-0.677585601806641
V
-1,0
BOT
0,13.3796666666667
V
0,-0.703334808349609
V
-1,0
BOT
0,13.3863333333333
V
0,-0.725746154785156
V
-1,0
BOT
0,13.393
V
0,-0.742912292480469
V
-1,0
BOT
0,13.3996666666667
V
0,-0.756740570068359
V
-1,0
BOT
0,13.4063333333333
V
0,-0.769138336181641
V
-1,0
BOT
0,13.413
V
0,-0.781059265136719
V
-1,0
BOT
0,13.4196666666667
V
0,-0.792503356933594
V
-1,0
BOT
0,13.4263333333333
V
0,-0.802516937255859
V
-1,0
BOT
0,13.433
V
0,-0.811576843261719
V
-1,0
BOT
0,13.4396666666667
V
0,-0.821113586425781
V
-1,0
BOT
0,13.4463333333333
V
0,-0.829696655273438
V
-1,0
BOT
0,13.453
V
0,-0.836372375488281
V
-1,0
BOT
0,13.4596666666667
V
0,-0.843524932861328
V
-1,0
BOT
0,13.4663333333333
V
0,-0.850200653076172
V
-1,0
BOT
0,13.473
V
0,-0.856876373291016
V
-1,0
BOT
0,13.4796666666667
V
0,-0.861167907714844
V
-1,0
BOT
0,13.4863333333333
V
0,-0.863075256347656
V
-1,0
BOT
0,13.493
V
0,-0.864505767822266
V
-1,0
BOT
0,13.4996666666667
V
0,-0.865459442138672
V
-1,0
BOT
0,13.5063333333333
V
0,-0.865459442138672
V
-1,0
BOT
0,13.513
V
0,-0.865459442138672
V
-1,0
BOT
0,13.5196666666667
V
0,-0.869274139404297
V
-1,0
BOT
0,13.5263333333333
V
0,-0.87738037109375
V
-1,0
BOT
0,13.533
V
0,-0.885963439941406
V
-1,0
BOT
0,13.5396666666667
V
0,-0.894546508789063
V
-1,0
BOT
0,13.5463333333333
V
0,-0.902652740478516
V
-1,0
BOT
0,13.553
V
0,-0.910758972167969
V
-1,0
BOT
0,13.5596666666667
V
0,-0.914573669433594
V
-1,0
BOT
0,13.5663333333333
V
0,-0.918388366699219
V
-1,0
BOT
0,13.573
V
0,-0.92315673828125
V
-1,0
BOT
0,13.5796666666667
V
0,-0.928401947021484
V
-1,0
BOT
0,13.5863333333333
V
0,-0.935077667236328
V
-1,0
BOT
0,13.593
V
0,-0.943183898925781
V
-1,0
BOT
0,13.5996666666667
V
0,-0.955104827880859
V
-1,0
BOT
0,13.6063333333333
V
0,-0.964164733886719
V
-1,0
BOT
0,13.613
V
0,-0.968456268310547
V
-1,0
BOT
0,13.6196666666667
V
0,-0.971794128417969
V
-1,0
BOT
0,13.6263333333333
V
0,-0.975608825683594
V
-1,0
BOT
0,13.633
V
0,-0.981807708740234
V
-1,0
BOT
0,13.6396666666667
V
0,-0.988006591796875
V
-1,0
BOT
0,13.6463333333333
V
0,-0.996112823486328
V
-1,0
BOT
0,13.653
V
0,-1.00612640380859
V
-1,0
BOT
0,13.6596666666667
V
0,-1.01613998413086
V
-1,0
BOT
0,13.6663333333333
V
0,-1.02424621582031
V
-1,0
BOT
0,13.673
V
0,-1.02901458740234
V
-1,0
BOT
0,13.6796666666667
V
0,-1.03044509887695
V
-1,0
BOT
0,13.6863333333333
V
0,-1.02853775024414
V
-1,0
BOT
0,13.693
V
0,-1.0228157043457
V
-1,0
BOT
0,13.6996666666667
V
0,-1.01423263549805
V
-1,0
BOT
0,13.7063333333333
V
0,-1.00374221801758
V
-1,0
BOT
0,13.713
V
0,-0.990867614746094
V
-1,0
BOT
0,13.7196666666667
V
0,-0.975608825683594
V
-1,0
BOT
0,13.7263333333333
V
0,-0.960350036621094
V
-1,0
BOT
0,13.733
V
0,-0.944137573242188
V
-1,0
BOT
0,13.7396666666667
V
0,-0.928401947021484
V
-1,0
BOT
0,13.7463333333333
V
0,-0.911712646484375
V
-1,0
BOT
0,13.753
V
0,-0.895500183105469
V
-1,0
BOT
0,13.7596666666667
V
0,-0.880241394042969
V
-1,0
BOT
0,13.7663333333333
V
0,-0.865459442138672
V
-1,0
BOT
0,13.773
V
0,-0.850200653076172
V
-1,0
BOT
0,13.7796666666667
V
0,-0.833511352539063
V
-1,0
BOT
0,13.7863333333333
V
0,-0.81634521484375
V
-1,0
BOT
0,13.793
V
0,-0.799655914306641
V
-1,0
BOT
0,13.7996666666667
V
0,-0.785350799560547
V
-1,0
BOT
0,13.8063333333333
V
0,-0.772476196289063
V
-1,0
BOT
0,13.813
V
0,-0.762939453125
V
-1,0
BOT
0,13.8196666666667
V
0,-0.755786895751953
V
-1,0
BOT
0,13.8263333333333
V
0,-0.7476806640625
V
-1,0
BOT
0,13.833
V
0,-0.737667083740234
V
-1,0
BOT
0,13.8396666666667
V
0,-0.727653503417969
V
-1,0
BOT
0,13.8463333333333
V
0,-0.718116760253906
V
-1,0
BOT
0,13.853
V
0,-0.708103179931641
V
-1,0
BOT
0,13.8596666666667
V
0,-0.698566436767578
V
-1,0
BOT
0,13.8663333333333
V
0,-0.692844390869141
V
-1,0
BOT
0,13.873
V
0,-0.6866455078125
V
-1,0
BOT
0,13.8796666666667
V
0,-0.678062438964844
V
-1,0
BOT
0,13.8863333333333
V
0,-0.666618347167969
V
-1,0
BOT
0,13.893
V
0,-0.656604766845703
V
-1,0
BOT
0,13.8996666666667
V
0,-0.647544860839844
V
-1,0
BOT
0,13.9063333333333
V
0,-0.638961791992188
V
-1,0
BOT
0,13.913
V
0,-0.630855560302734
V
-1,0
BOT
0,13.9196666666667
V
0,-0.624656677246094
V
-1,0
BOT
0,13.9263333333333
V
0,-0.617027282714844
V
-1,0
BOT
0,13.933
V
0,-0.606060028076172
V
-1,0
BOT
0,13.9396666666667
V
0,-0.594139099121094
V
-1,0
BOT
0,13.9463333333333
V
0,-0.582695007324219
V
-1,0
BOT
0,13.953
V
0,-0.570774078369141
V
-1,0
BOT
0,13.9596666666667
V
0,-0.556468963623047
V
-1,0
BOT
0,13.9663333333333
V
0,-0.543117523193359
V
-1,0
BOT
0,13.973
V
0,-0.530242919921875
V
-1,0
BOT
0,13.9796666666667
V
0,-0.518798828125
V
-1,0
BOT
0,13.9863333333333
V
0,-0.508785247802734
V
-1,0
BOT
0,13.993
V
0,-0.501632690429688
V
-1,0
BOT
0,13.9996666666667
V
0,-0.497341156005859
V
-1,0
BOT
0,14.0063333333333
V
0,-0.493049621582031
V
-1,0
BOT
0,14.013
V
0,-0.490665435791016
V
-1,0
BOT
0,14.0196666666667
V
0,-0.490188598632813
V
-1,0
BOT
0,14.0263333333333
V
0,-0.490188598632813
V
-1,0
BOT
0,14.033
V
0,-0.490188598632813
V
-1,0
BOT
0,14.0396666666667
V
0,-0.492095947265625
V
-1,0
BOT
0,14.0463333333333
V
0,-0.499248504638672
V
-1,0
BOT
0,14.053
V
0,-0.509738922119141
V
-1,0
BOT
0,14.0596666666667
V
0,-0.520706176757813
V
-1,0
BOT
0,14.0663333333333
V
0,-0.533580780029297
V
-1,0
BOT
0,14.073
V
0,-0.547409057617188
V
-1,0
BOT
0,14.0796666666667
V
0,-0.560760498046875
V
-1,0
BOT
0,14.0863333333333
V
0,-0.571727752685547
V
-1,0
BOT
0,14.093
V
0,-0.582695007324219
V
-1,0
BOT
0,14.0996666666667
V
0,-0.5950927734375
V
-1,0
BOT
0,14.1063333333333
V
0,-0.607967376708984
V
-1,0
BOT
0,14.113
V
0,-0.620365142822266
V
-1,0
BOT
0,14.1196666666667
V
0,-0.631332397460938
V
-1,0
BOT
0,14.1263333333333
V
0,-0.640392303466797
V
-1,0
BOT
0,14.133
V
0,-0.647068023681641
V
-1,0
BOT
0,14.1396666666667
V
0,-0.64849853515625
V
-1,0
BOT
0,14.1463333333333
V
0,-0.644683837890625
V
-1,0
BOT
0,14.153
V
0,-0.634670257568359
V
-1,0
BOT
0,14.1596666666667
V
0,-0.621318817138672
V
-1,0
BOT
0,14.1663333333333
V
0,-0.605106353759766
V
-1,0
BOT
0,14.173
V
0,-0.583171844482422
V
-1,0
BOT
0,14.1796666666667
V
0,-0.553607940673828
V
-1,0
BOT
0,14.1863333333333
V
0,-0.516414642333984
V
-1,0
BOT
0,14.193
V
0,-0.472068786621094
V
-1,0
BOT
0,14.1996666666667
V
0,-0.41961669921875
V
-1,0
BOT
0,14.2063333333333
V
0,-0.357627868652344
V
-1,0
BOT
0,14.213
V
0,-0.287532806396484
V
-1,0
BOT
0,14.2196666666667
V
0,-0.212192535400391
V
-1,0
BOT
0,14.2263333333333
V
0,-0.130176544189453
V
-1,0
BOT
0,14.233
V
0,-0.0429153442382813
V
-1,0
BOT
0,14.2396666666667
V
0,0.049591064453125
V
-1,0
BOT
0,14.2463333333333
V
0,0.144481658935547
V
-1,0
BOT
0,14.253
V
0,0.240325927734375
V
-1,0
BOT
0,14.2596666666667
V
0,0.336647033691406
V
-1,0
BOT
0,14.2663333333333
V
0,0.433921813964844
V
-1,0
BOT
0,14.273
V
0,0.530242919921875
V
-1,0
BOT
0,14.2796666666667
V
0,0.623226165771484
V
-1,0
BOT
0,14.2863333333333
V
0,0.711441040039063
V
-1,0
BOT
0,14.293
V
0,0.795841217041016
V
-1,0
BOT
0,14.2996666666667
V
0,0.874996185302734
V
-1,0
BOT
0,14.3063333333333
V
0,0.947952270507813
V
-1,0
BOT
0,14.313
V
0,1.01518630981445
V
-1,0
BOT
0,14.3196666666667
V
0,1.07669830322266
V
-1,0
BOT
0,14.3263333333333
V
0,1.13153457641602
V
-1,0
BOT
0,14.333
V
0,1.17635726928711
V
-1,0
BOT
0,14.3396666666667
V
0,1.21116638183594
V
-1,0
BOT
0,14.3463333333333
V
0,1.23453140258789
V
-1,0
BOT
0,14.353
V
0,1.24359130859375
V
-1,0
BOT
0,14.3596666666667
V
0,1.24025344848633
V
-1,0
BOT
0,14.3663333333333
V
0,1.22785568237305
V
-1,0
BOT
0,14.373
V
0,1.20878219604492
V
-1,0
BOT
0,14.3796666666667
V
0,1.18207931518555
V
-1,0
BOT
0,14.3863333333333
V
0,1.14631652832031
V
-1,0
BOT
0,14.393
V
0,1.10435485839844
V
-1,0
BOT
0,14.3996666666667
V
0,1.05810165405273
V
-1,0
BOT
0,14.4063333333333
V
0,1.00898742675781
V
-1,0
BOT
0,14.413
V
0,0.957965850830078
V
-1,0
BOT
0,14.4196666666667
V
0,0.905990600585938
V
-1,0
BOT
0,14.4263333333333
V
0,0.851631164550781
V
-1,0
BOT
0,14.433
V
0,0.795841217041016
V
-1,0
BOT
0,14.4396666666667
V
0,0.735759735107422
V
-1,0
BOT
0,14.4463333333333
V
0,0.670433044433594
V
-1,0
BOT
0,14.453
V
0,0.603199005126953
V
-1,0
BOT
0,14.4596666666667
V
0,0.537872314453125
V
-1,0
BOT
0,14.4663333333333
V
0,0.474452972412109
V
-1,0
BOT
0,14.473
V
0,0.410556793212891
V
-1,0
BOT
0,14.4796666666667
V
0,0.347137451171875
V
-1,0
BOT
0,14.4863333333333
V
0,0.286102294921875
V
-1,0
BOT
0,14.493
V
0,0.227928161621094
V
-1,0
BOT
0,14.4996666666667
V
0,0.1678466796875
V
-1,0
BOT
0,14.5063333333333
V
0,0.108242034912109
V
-1,0
BOT
0,14.513
V
0,0.0548362731933594
V
-1,0
BOT
0,14.5196666666667
V
0,0.00667572021484375
V
-1,0
BOT
0,14.5263333333333
V
0,-0.0376701354980469
V
-1,0
BOT
0,14.533
V
0,-0.0829696655273438
V
-1,0
BOT
0,14.5396666666667
V
0,-0.126838684082031
V
-1,0
BOT
0,14.5463333333333
V
0,-0.171184539794922
V
-1,0
BOT
0,14.553
V
0,-0.215053558349609
V
-1,0
BOT
0,14.5596666666667
V
0,-0.254631042480469
V
-1,0
BOT
0,14.5663333333333
V
0,-0.290870666503906
V
-1,0
BOT
0,14.573
V
0,-0.322341918945312
V
-1,0
BOT
0,14.5796666666667
V
0,-0.351428985595703
V
-1,0
BOT
0,14.5863333333333
V
0,-0.377178192138672
V
-1,0
BOT
0,14.593
V
0,-0.400543212890625
V
-1,0
BOT
0,14.5996666666667
V
0,-0.424861907958984
V
-1,0
BOT
0,14.6063333333333
V
0,-0.449657440185547
V
-1,0
BOT
0,14.613
V
0,-0.474452972412109
V
-1,0
BOT
0,14.6196666666667
V
0,-0.496864318847656
V
-1,0
BOT
0,14.6263333333333
V
0,-0.516891479492188
V
-1,0
BOT
0,14.633
V
0,-0.535964965820313
V
-1,0
BOT
0,14.6396666666667
V
0,-0.554561614990234
V
-1,0
BOT
0,14.6463333333333
V
0,-0.571250915527344
V
-1,0
BOT
0,14.653
V
0,-0.585556030273438
V
-1,0
BOT
0,14.6596666666667
V
0,-0.600337982177734
V
-1,0
BOT
0,14.6663333333333
V
0,-0.616073608398438
V
-1,0
BOT
0,14.673
V
0,-0.632286071777344
V
-1,0
BOT
0,14.6796666666667
V
0,-0.64849853515625
V
-1,0
BOT
0,14.6863333333333
V
0,-0.664710998535156
V
-1,0
BOT
0,14.693
V
0,-0.684738159179688
V
-1,0
BOT
0,14.6996666666667
V
0,-0.705242156982422
V
-1,0
BOT
0,14.7063333333333
V
0,-0.726699829101563
V
-1,0
BOT
0,14.713
V
0,-0.7476806640625
V
-1,0
BOT
0,14.7196666666667
V
0,-0.767230987548828
V
-1,0
BOT
0,14.7263333333333
V
0,-0.787258148193359
V
-1,0
BOT
0,14.733
V
0,-0.807762145996094
V
-1,0
BOT
0,14.7396666666667
V
0,-0.828742980957031
V
-1,0
BOT
0,14.7463333333333
V
0,-0.845909118652344
V
-1,0
BOT
0,14.753
V
0,-0.86212158203125
V
-1,0
BOT
0,14.7596666666667
V
0,-0.87738037109375
V
-1,0
BOT
0,14.7663333333333
V
0,-0.890254974365234
V
-1,0
BOT
0,14.773
V
0,-0.899314880371094
V
-1,0
BOT
0,14.7796666666667
V
0,-0.906944274902344
V
-1,0
BOT
0,14.7863333333333
V
0,-0.914096832275391
V
-1,0
BOT
0,14.793
V
0,-0.920295715332031
V
-1,0
BOT
0,14.7996666666667
V
0,-0.924587249755859
V
-1,0
BOT
0,14.8063333333333
V
0,-0.927448272705078
V
-1,0
BOT
0,14.813
V
0,-0.928401947021484
V
-1,0
BOT
0,14.8196666666667
V
0,-0.927448272705078
V
-1,0
BOT
0,14.8263333333333
V
0,-0.923633575439453
V
-1,0
BOT
0,14.833
V
0,-0.918865203857422
V
-1,0
BOT
0,14.8396666666667
V
0,-0.911712646484375
V
-1,0
BOT
0,14.8463333333333
V
0,-0.903606414794922
V
-1,0
BOT
0,14.853
V
0,-0.894069671630859
V
-1,0
BOT
0,14.8596666666667
V
0,-0.885009765625
V
-1,0
BOT
0,14.8663333333333
V
0,-0.875473022460938
V
-1,0
BOT
0,14.873
V
0,-0.865459442138672
V
-1,0
BOT
0,14.8796666666667
V
0,-0.857353210449219
V
-1,0
BOT
0,14.8863333333333
V
0,-0.850200653076172
V
-1,0
BOT
0,14.893
V
0,-0.841140747070313
V
-1,0
BOT
0,14.8996666666667
V
0,-0.828742980957031
V
-1,0
BOT
0,14.9063333333333
V
0,-0.816822052001953
V
-1,0
BOT
0,14.913
V
0,-0.805854797363281
V
-1,0
BOT
0,14.9196666666667
V
0,-0.794887542724609
V
-1,0
BOT
0,14.9263333333333
V
0,-0.784873962402344
V
-1,0
BOT
0,14.933
V
0,-0.774860382080078
V
-1,0
BOT
0,14.9396666666667
V
0,-0.765323638916016
V
-1,0
BOT
0,14.9463333333333
V
0,-0.753879547119141
V
-1,0
BOT
0,14.953
V
0,-0.741481781005859
V
-1,0
BOT
0,14.9596666666667
V
0,-0.733852386474609
V
-1,0
BOT
0,14.9663333333333
V
0,-0.730037689208984
V
-1,0
BOT
0,14.973
V
0,-0.730037689208984
V
-1,0
BOT
0,14.9796666666667
V
0,-0.731945037841797
V
-1,0
BOT
0,14.9863333333333
V
0,-0.736713409423828
V
-1,0
BOT
0,14.993
V
0,-0.742912292480469
V
-1,0
BOT
0,14.9996666666667
V
0,-0.751972198486328
V
-1,0
BOT
0,15.0063333333333
V
0,-0.761985778808594
V
-1,0
BOT
0,15.013
V
0,-0.772476196289063
V
-1,0
BOT
0,15.0196666666667
V
0,-0.783920288085938
V
-1,0
BOT
0,15.0263333333333
V
0,-0.797748565673828
V
-1,0
BOT
0,15.033
V
0,-0.813007354736328
V
-1,0
BOT
0,15.0396666666667
V
0,-0.826835632324219
V
-1,0
BOT
0,15.0463333333333
V
0,-0.840187072753906
V
-1,0
BOT
0,15.053
V
0,-0.854969024658203
V
-1,0
BOT
0,15.0596666666667
V
0,-0.873565673828125
V
-1,0
BOT
0,15.0663333333333
V
0,-0.894069671630859
V
-1,0
BOT
0,15.073
V
0,-0.91552734375
V
-1,0
BOT
0,15.0796666666667
V
0,-0.936508178710938
V
-1,0
BOT
0,15.0863333333333
V
0,-0.957012176513672
V
-1,0
BOT
0,15.093
V
0,-0.977039337158203
V
-1,0
BOT
0,15.0996666666667
V
0,-0.996589660644531
V
-1,0
BOT
0,15.1063333333333
V
0,-1.01661682128906
V
-1,0
BOT
0,15.113
V
0,-1.03664398193359
V
-1,0
BOT
0,15.1196666666667
V
0,-1.05619430541992
V
-1,0
BOT
0,15.1263333333333
V
0,-1.07431411743164
V
-1,0
BOT
0,15.133
V
0,-1.09100341796875
V
-1,0
BOT
0,15.1396666666667
V
0,-1.10769271850586
V
-1,0
BOT
0,15.1463333333333
V
0,-1.12295150756836
V
-1,0
BOT
0,15.153
V
0,-1.13630294799805
V
-1,0
BOT
0,15.1596666666667
V
0,-1.14774703979492
V
-1,0
BOT
0,15.1663333333333
V
0,-1.1601448059082
V
-1,0
BOT
0,15.173
V
0,-1.17397308349609
V
-1,0
BOT
0,15.1796666666667
V
0,-1.18732452392578
V
-1,0
BOT
0,15.1863333333333
V
0,-1.20067596435547
V
-1,0
BOT
0,15.193
V
0,-1.21450424194336
V
-1,0
BOT
0,15.1996666666667
V
0,-1.22976303100586
V
-1,0
BOT
0,15.2063333333333
V
0,-1.24263763427734
V
-1,0
BOT
0,15.213
V
0,-1.25217437744141
V
-1,0
BOT
0,15.2196666666667
V
0,-1.25980377197266
V
-1,0
BOT
0,15.2263333333333
V
0,-1.26504898071289
V
-1,0
BOT
0,15.233
V
0,-1.26886367797852
V
-1,0
BOT
0,15.2396666666667
V
0,-1.27315521240234
V
-1,0
BOT
0,15.2463333333333
V
0,-1.27840042114258
V
-1,0
BOT
0,15.253
V
0,-1.28412246704102
V
-1,0
BOT
0,15.2596666666667
V
0,-1.28936767578125
V
-1,0
BOT
0,15.2663333333333
V
0,-1.29556655883789
V
-1,0
BOT
0,15.273
V
0,-1.30271911621094
V
-1,0
BOT
0,15.2796666666667
V
0,-1.30701065063477
V
-1,0
BOT
0,15.2863333333333
V
0,-1.30939483642578
V
-1,0
BOT
0,15.293
V
0,-1.31082534790039
V
-1,0
BOT
0,15.2996666666667
V
0,-1.3127326965332
V
-1,0
BOT
0,15.3063333333333
V
0,-1.31416320800781
V
-1,0
BOT
0,15.313
V
0,-1.31702423095703
V
-1,0
BOT
0,15.3196666666667
V
0,-1.32131576538086
V
-1,0
BOT
0,15.3263333333333
V
0,-1.3270378112793
V
-1,0
BOT
0,15.333
V
0,-1.33371353149414
V
-1,0
BOT
0,15.3396666666667
V
0,-1.33848190307617
V
-1,0
BOT
0,15.3463333333333
V
0,-1.33991241455078
V
-1,0
BOT
0,15.353
V
0,-1.33848190307617
V
-1,0
BOT
0,15.3596666666667
V
0,-1.33609771728516
V
-1,0
BOT
0,15.3663333333333
V
0,-1.33323669433594
V
-1,0
BOT
0,15.373
V
0,-1.32942199707031
V
-1,0
BOT
0,15.3796666666667
V
0,-1.32608413696289
V
-1,0
BOT
0,15.3863333333333
V
0,-1.32131576538086
V
-1,0
BOT
0,15.393
V
0,-1.31607055664062
V
-1,0
BOT
0,15.3996666666667
V
0,-1.30987167358398
V
-1,0
BOT
0,15.4063333333333
V
0,-1.30367279052734
V
-1,0
BOT
0,15.413
V
0,-1.29508972167969
V
-1,0
BOT
0,15.4196666666667
V
0,-1.28316879272461
V
-1,0
BOT
0,15.4263333333333
V
0,-1.27124786376953
V
-1,0
BOT
0,15.433
V
0,-1.25885009765625
V
-1,0
BOT
0,15.4396666666667
V
0,-1.24502182006836
V
-1,0
BOT
0,15.4463333333333
V
0,-1.22976303100586
V
-1,0
BOT
0,15.453
V
0,-1.21545791625977
V
-1,0
BOT
0,15.4596666666667
V
0,-1.20306015014648
V
-1,0
BOT
0,15.4663333333333
V
0,-1.18684768676758
V
-1,0
BOT
0,15.473
V
0,-1.16777420043945
V
-1,0
BOT
0,15.4796666666667
V
0,-1.1448860168457
V
-1,0
BOT
0,15.4863333333333
V
0,-1.12009048461914
V
-1,0
BOT
0,15.493
V
0,-1.09338760375977
V
-1,0
BOT
0,15.4996666666667
V
0,-1.06525421142578
V
-1,0
BOT
0,15.5063333333333
V
0,-1.03902816772461
V
-1,0
BOT
0,15.513
V
0,-1.01470947265625
V
-1,0
BOT
0,15.5196666666667
V
0,-0.995159149169922
V
-1,0
BOT
0,15.5263333333333
V
0,-0.977039337158203
V
-1,0
BOT
0,15.533
V
0,-0.958919525146484
V
-1,0
BOT
0,15.5396666666667
V
0,-0.937461853027344
V
-1,0
BOT
0,15.5463333333333
V
0,-0.916004180908203
V
-1,0
BOT
0,15.553
V
0,-0.895500183105469
V
-1,0
BOT
0,15.5596666666667
V
0,-0.876903533935547
V
-1,0
BOT
0,15.5663333333333
V
0,-0.860691070556641
V
-1,0
BOT
0,15.573
V
0,-0.84686279296875
V
-1,0
BOT
0,15.5796666666667
V
0,-0.836849212646484
V
-1,0
BOT
0,15.5863333333333
V
0,-0.827789306640625
V
-1,0
BOT
0,15.593
V
0,-0.819683074951172
V
-1,0
BOT
0,15.5996666666667
V
0,-0.811100006103516
V
-1,0
BOT
0,15.6063333333333
V
0,-0.802516937255859
V
-1,0
BOT
0,15.613
V
0,-0.795841217041016
V
-1,0
BOT
0,15.6196666666667
V
0,-0.791072845458984
V
-1,0
BOT
0,15.6263333333333
V
0,-0.790596008300781
V
-1,0
BOT
0,15.633
V
0,-0.79345703125
V
-1,0
BOT
0,15.6396666666667
V
0,-0.795364379882813
V
-1,0
BOT
0,15.6463333333333
V
0,-0.795841217041016
V
-1,0
BOT
0,15.653
V
0,-0.796318054199219
V
-1,0
BOT
0,15.6596666666667
V
0,-0.797748565673828
V
-1,0
BOT
0,15.6663333333333
V
0,-0.800132751464844
V
-1,0
BOT
0,15.673
V
0,-0.80108642578125
V
-1,0
BOT
0,15.6796666666667
V
0,-0.801563262939453
V
-1,0
BOT
0,15.6863333333333
V
0,-0.802993774414063
V
-1,0
BOT
0,15.693
V
0,-0.806331634521484
V
-1,0
BOT
0,15.6996666666667
V
0,-0.811576843261719
V
-1,0
BOT
0,15.7063333333333
V
0,-0.815868377685547
V
-1,0
BOT
0,15.713
V
0,-0.821590423583984
V
-1,0
BOT
0,15.7196666666667
V
0,-0.829219818115234
V
-1,0
BOT
0,15.7263333333333
V
0,-0.837802886962891
V
-1,0
BOT
0,15.733
V
0,-0.845909118652344
V
-1,0
BOT
0,15.7396666666667
V
0,-0.852584838867188
V
-1,0
BOT
0,15.7463333333333
V
0,-0.862598419189453
V
-1,0
BOT
0,15.753
V
0,-0.873565673828125
V
-1,0
BOT
0,15.7596666666667
V
0,-0.885963439941406
V
-1,0
BOT
0,15.7663333333333
V
0,-0.9002685546875
V
-1,0
BOT
0,15.773
V
0,-0.918388366699219
V
-1,0
BOT
0,15.7796666666667
V
0,-0.937938690185547
V
-1,0
BOT
0,15.7863333333333
V
0,-0.956535339355469
V
-1,0
BOT
0,15.793
V
0,-0.973701477050781
V
-1,0
BOT
0,15.7996666666667
V
0,-0.990390777587891
V
-1,0
BOT
0,15.8063333333333
V
0,-1.0066032409668
V
-1,0
BOT
0,15.813
V
0,-1.0223388671875
V
-1,0
BOT
0,15.8196666666667
V
0,-1.03902816772461
V
-1,0
BOT
0,15.8263333333333
V
0,-1.05571746826172
V
-1,0
BOT
0,15.833
V
0,-1.07192993164062
V
-1,0
BOT
0,15.8396666666667
V
0,-1.08909606933594
V
-1,0
BOT
0,15.8463333333333
V
0,-1.10960006713867
V
-1,0
BOT
0,15.853
V
0,-1.13248825073242
V
-1,0
BOT
0,15.8596666666667
V
0,-1.15728378295898
V
-1,0
BOT
0,15.8663333333333
V
0,-1.18303298950195
V
-1,0
BOT
0,15.873
V
0,-1.20925903320312
V
-1,0
BOT
0,15.8796666666667
V
0,-1.23357772827148
V
-1,0
BOT
0,15.8863333333333
V
0,-1.25551223754883
V
-1,0
BOT
0,15.893
V
0,-1.27601623535156
V
-1,0
BOT
0,15.8996666666667
V
0,-1.2965202331543
V
-1,0
BOT
0,15.9063333333333
V
0,-1.31607055664062
V
-1,0
BOT
0,15.913
V
0,-1.33657455444336
V
-1,0
BOT
0,15.9196666666667
V
0,-1.35946273803711
V
-1,0
BOT
0,15.9263333333333
V
0,-1.38282775878906
V
-1,0
BOT
0,15.933
V
0,-1.40380859375
V
-1,0
BOT
0,15.9396666666667
V
0,-1.42145156860352
V
-1,0
BOT
0,15.9463333333333
V
0,-1.43909454345703
V
-1,0
BOT
0,15.953
V
0,-1.45721435546875
V
-1,0
BOT
0,15.9596666666667
V
0,-1.47342681884766
V
-1,0
BOT
0,15.9663333333333
V
0,-1.48725509643555
V
-1,0
BOT
0,15.973
V
0,-1.50108337402344
V
-1,0
BOT
0,15.9796666666667
V
0,-1.51491165161133
V
-1,0
BOT
0,15.9863333333333
V
0,-1.52683258056641
V
-1,0
BOT
0,15.993
V
0,-1.53732299804687
V
-1,0
BOT
0,15.9996666666667
V
0,-1.54876708984375
V
-1,0
BOT
0,16.0063333333333
V
0,-1.56116485595703
V
-1,0
BOT
0,16.013
V
0,-1.5721321105957
V
-1,0
BOT
0,16.0196666666667
V
0,-1.58119201660156
V
-1,0
BOT
0,16.0263333333333
V
0,-1.58786773681641
V
-1,0
BOT
0,16.033
V
0,-1.59072875976562
V
-1,0
BOT
0,16.0396666666667
V
0,-1.58929824829102
V
-1,0
BOT
0,16.0463333333333
V
0,-1.58357620239258
V
-1,0
BOT
0,16.053
V
0,-1.57594680786133
V
-1,0
BOT
0,16.0596666666667
V
0,-1.56545639038086
V
-1,0
BOT
0,16.0663333333333
V
0,-1.55210494995117
V
-1,0
BOT
0,16.073
V
0,-1.53493881225586
V
-1,0
BOT
0,16.0796666666667
V
0,-1.51443481445312
V
-1,0
BOT
0,16.0863333333333
V
0,-1.49154663085937
V
-1,0
BOT
0,16.093
V
0,-1.4653205871582
V
-1,0
BOT
0,16.0996666666667
V
0,-1.43766403198242
V
-1,0
BOT
0,16.1063333333333
V
0,-1.40666961669922
V
-1,0
BOT
0,16.113
V
0,-1.3737678527832
V
-1,0
BOT
0,16.1196666666667
V
0,-1.33943557739258
V
-1,0
BOT
0,16.1263333333333
V
0,-1.30176544189453
V
-1,0
BOT
0,16.133
V
0,-1.25980377197266
V
-1,0
BOT
0,16.1396666666667
V
0,-1.21402740478516
V
-1,0
BOT
0,16.1463333333333
V
0,-1.16586685180664
V
-1,0
BOT
0,16.153
V
0,-1.11627578735352
V
-1,0
BOT
0,16.1596666666667
V
0,-1.06477737426758
V
-1,0
BOT
0,16.1663333333333
V
0,-1.01184844970703
V
-1,0
BOT
0,16.173
V
0,-0.957012176513672
V
-1,0
BOT
0,16.1796666666667
V
0,-0.9002685546875
V
-1,0
BOT
0,16.1863333333333
V
0,-0.842571258544922
V
-1,0
BOT
0,16.193
V
0,-0.783920288085938
V
-1,0
BOT
0,16.1996666666667
V
0,-0.722408294677734
V
-1,0
BOT
0,16.2063333333333
V
0,-0.6561279296875
V
-1,0
BOT
0,16.213
V
0,-0.585556030273438
V
-1,0
BOT
0,16.2196666666667
V
0,-0.508785247802734
V
-1,0
BOT
0,16.2263333333333
V
0,-0.423908233642578
V
-1,0
BOT
0,16.233
V
0,-0.326156616210937
V
-1,0
BOT
0,16.2396666666667
V
0,-0.213146209716797
V
-1,0
BOT
0,16.2463333333333
V
0,-0.08392333984375
V
-1,0
BOT
0,16.253
V
0,0.0629425048828125
V
-1,0
BOT
0,16.2596666666667
V
0,0.229358673095703
V
-1,0
BOT
0,16.2663333333333
V
0,0.419139862060547
V
-1,0
BOT
0,16.273
V
0,0.635147094726563
V
-1,0
BOT
0,16.2796666666667
V
0,0.880718231201172
V
-1,0
BOT
0,16.2863333333333
V
0,1.16300582885742
V
-1,0
BOT
0,16.293
V
0,1.48868560791016
V
-1,0
BOT
0,16.2996666666667
V
0,1.86300277709961
V
-1,0
BOT
0,16.3063333333333
V
0,2.2883415222168
V
-1,0
BOT
0,16.313
V
0,2.76803970336914
V
-1,0
BOT
0,16.3196666666667
V
0,3.30543518066406
V
-1,0
BOT
0,16.3263333333333
V
0,3.90481948852539
V
-1,0
BOT
0,16.333
V
0,4.56857681274414
V
-1,0
BOT
0,16.3396666666667
V
0,5.29718399047852
V
-1,0
BOT
0,16.3463333333333
V
0,6.08921051025391
V
-1,0
BOT
0,16.353
V
0,6.9427490234375
V
-1,0
BOT
0,16.3596666666667
V
0,7.85493850708008
V
-1,0
BOT
0,16.3663333333333
V
0,8.81814956665039
V
-1,0
BOT
0,16.373
V
0,9.82379913330078
V
-1,0
BOT
0,16.3796666666667
V
0,10.8623504638672
V
-1,0
BOT
0,16.3863333333333
V
0,11.9256973266602
V
-1,0
BOT
0,16.393
V
0,13.005256652832
V
-1,0
BOT
0,16.3996666666667
V
0,14.0857696533203
V
-1,0
BOT
0,16.4063333333333
V
0,15.1529312133789
V
-1,0
BOT
0,16.413
V
0,16.1962509155273
V
-1,0
BOT
0,16.4196666666667
V
0,17.2033309936523
V
-1,0
BOT
0,16.4263333333333
V
0,18.162727355957
V
-1,0
BOT
0,16.433
V
0,19.0625190734863
V
-1,0
BOT
0,16.4396666666667
V
0,19.8945999145508
V
-1,0
BOT
0,16.4463333333333
V
0,20.6518173217773
V
-1,0
BOT
0,16.453
V
0,21.3255882263184
V
-1,0
BOT
0,16.4596666666667
V
0,21.9087600708008
V
-1,0
BOT
0,16.4663333333333
V
0,22.3984718322754
V
-1,0
BOT
0,16.473
V
0,22.7932929992676
V
-1,0
BOT
0,16.4796666666667
V
0,23.0922698974609
V
-1,0
BOT
0,16.4863333333333
V
0,23.2954025268555
V
-1,0
BOT
0,16.493
V
0,23.404598236084
V
-1,0
BOT
0,16.4996666666667
V
0,23.4260559082031
V
-1,0
BOT
0,16.5063333333333
V
0,23.3659744262695
V
-1,0
BOT
0,16.513
V
0,23.231029510498
V
-1,0
BOT
0,16.5196666666667
V
0,23.0259895324707
V
-1,0
BOT
0,16.5263333333333
V
0,22.7594375610352
V
-1,0
BOT
0,16.533
V
0,22.4413871765137
V
-1,0
BOT
0,16.5396666666667
V
0,22.0775604248047
V
-1,0
BOT
0,16.5463333333333
V
0,21.6741561889648
V
-1,0
BOT
0,16.553
V
0,21.2392807006836
V
-1,0
BOT
0,16.5596666666667
V
0,20.7881927490234
V
-1,0
BOT
0,16.5663333333333
V
0,20.329475402832
V
-1,0
BOT
0,16.573
V
0,19.8721885681152
V
-1,0
BOT
0,16.5796666666667
V
0,19.4253921508789
V
-1,0
BOT
0,16.5863333333333
V
0,19.0010070800781
V
-1,0
BOT
0,16.593
V
0,18.608570098877
V
-1,0
BOT
0,16.5996666666667
V
0,18.2509422302246
V
-1,0
BOT
0,16.6063333333333
V
0,17.939567565918
V
-1,0
BOT
0,16.613
V
0,17.6820755004883
V
-1,0
BOT
0,16.6196666666667
V
0,17.4875259399414
V
-1,0
BOT
0,16.6263333333333
V
0,17.3606872558594
V
-1,0
BOT
0,16.633
V
0,17.3053741455078
V
-1,0
BOT
0,16.6396666666667
V
0,17.3263549804687
V
-1,0
BOT
0,16.6463333333333
V
0,17.4250602722168
V
-1,0
BOT
0,16.653
V
0,17.6033973693848
V
-1,0
BOT
0,16.6596666666667
V
0,17.8580284118652
V
-1,0
BOT
0,16.6663333333333
V
0,18.1856155395508
V
-1,0
BOT
0,16.673
V
0,18.5823440551758
V
-1,0
BOT
0,16.6796666666667
V
0,19.04296875
V
-1,0
BOT
0,16.6863333333333
V
0,19.5574760437012
V
-1,0
BOT
0,16.693
V
0,20.1144218444824
V
-1,0
BOT
0,16.6996666666667
V
0,20.7037925720215
V
-1,0
BOT
0,16.7063333333333
V
0,21.3179588317871
V
-1,0
BOT
0,16.713
V
0,21.9426155090332
V
-1,0
BOT
0,16.7196666666667
V
0,22.5648880004883
V
-1,0
BOT
0,16.7263333333333
V
0,23.1714248657227
V
-1,0
BOT
0,16.733
V
0,23.7531661987305
V
-1,0
BOT
0,16.7396666666667
V
0,24.299144744873
V
-1,0
BOT
0,16.7463333333333
V
0,24.7969627380371
V
-1,0
BOT
0,16.753
V
0,25.2361297607422
V
-1,0
BOT
0,16.7596666666667
V
0,25.6099700927734
V
-1,0
BOT
0,16.7663333333333
V
0,25.9137153625488
V
-1,0
BOT
0,16.773
V
0,26.1445045471191
V
-1,0
BOT
0,16.7796666666667
V
0,26.298999786377
V
-1,0
BOT
0,16.7863333333333
V
0,26.3762474060059
V
-1,0
BOT
0,16.793
V
0,26.3757705688477
V
-1,0
BOT
0,16.7996666666667
V
0,26.2966156005859
V
-1,0
BOT
0,16.8063333333333
V
0,26.1392593383789
V
-1,0
BOT
0,16.813
V
0,25.9084701538086
V
-1,0
BOT
0,16.8196666666667
V
0,25.6061553955078
V
-1,0
BOT
0,16.8263333333333
V
0,25.2366065979004
V
-1,0
BOT
0,16.833
V
0,24.8064994812012
V
-1,0
BOT
0,16.8396666666667
V
0,24.322509765625
V
-1,0
BOT
0,16.8463333333333
V
0,23.7898826599121
V
-1,0
BOT
0,16.853
V
0,23.2124328613281
V
-1,0
BOT
0,16.8596666666667
V
0,22.5949287414551
V
-1,0
BOT
0,16.8663333333333
V
0,21.942138671875
V
-1,0
BOT
0,16.873
V
0,21.2593078613281
V
-1,0
BOT
0,16.8796666666667
V
0,20.5526351928711
V
-1,0
BOT
0,16.8863333333333
V
0,19.8264122009277
V
-1,0
BOT
0,16.893
V
0,19.0873146057129
V
-1,0
BOT
0,16.8996666666667
V
0,18.3396339416504
V
-1,0
BOT
0,16.9063333333333
V
0,17.5871849060059
V
-1,0
BOT
0,16.913
V
0,16.8347358703613
V
-1,0
BOT
0,16.9196666666667
V
0,16.0837173461914
V
-1,0
BOT
0,16.9263333333333
V
0,15.3374671936035
V
-1,0
BOT
0,16.933
V
0,14.5950317382812
V
-1,0
BOT
0,16.9396666666667
V
0,13.859748840332
V
-1,0
BOT
0,16.9463333333333
V
0,13.1330490112305
V
-1,0
BOT
0,16.953
V
0,12.4192237854004
V
-1,0
BOT
0,16.9596666666667
V
0,11.7201805114746
V
-1,0
BOT
0,16.9663333333333
V
0,11.0373497009277
V
-1,0
BOT
0,16.973
V
0,10.3740692138672
V
-1,0
BOT
0,16.9796666666667
V
0,9.73129272460938
V
-1,0
BOT
0,16.9863333333333
V
0,9.1094970703125
V
-1,0
BOT
0,16.993
V
0,8.50629806518555
V
-1,0
BOT
0,16.9996666666667
V
0,7.92503356933594
V
-1,0
BOT
0,17.0063333333333
V
0,7.36570358276367
V
-1,0
BOT
0,17.013
V
0,6.82783126831055
V
-1,0
BOT
0,17.0196666666667
V
0,6.31380081176758
V
-1,0
BOT
0,17.0263333333333
V
0,5.82599639892578
V
-1,0
BOT
0,17.033
V
0,5.36441802978516
V
-1,0
BOT
0,17.0396666666667
V
0,4.92572784423828
V
-1,0
BOT
0,17.0463333333333
V
0,4.50849533081055
V
-1,0
BOT
0,17.053
V
0,4.11224365234375
V
-1,0
BOT
0,17.0596666666667
V
0,3.73506546020508
V
-1,0
BOT
0,17.0663333333333
V
0,3.37791442871094
V
-1,0
BOT
0,17.073
V
0,3.04126739501953
V
-1,0
BOT
0,17.0796666666667
V
0,2.72464752197266
V
-1,0
BOT
0,17.0863333333333
V
0,2.42805480957031
V
-1,0
BOT
0,17.093
V
0,2.1519660949707
V
-1,0
BOT
0,17.0996666666667
V
0,1.89495086669922
V
-1,0
BOT
0,17.1063333333333
V
0,1.65462493896484
V
-1,0
BOT
0,17.113
V
0,1.42908096313477
V
-1,0
BOT
0,17.1196666666667
V
0,1.21688842773437
V
-1,0
BOT
0,17.1263333333333
V
0,1.01757049560547
V
-1,0
BOT
0,17.133
V
0,0.832557678222656
V
-1,0
BOT
0,17.1396666666667
V
0,0.660419464111328
V
-1,0
BOT
0,17.1463333333333
V
0,0.501632690429688
V
-1,0
BOT
0,17.153
V
0,0.357151031494141
V
-1,0
BOT
0,17.1596666666667
V
0,0.226020812988281
V
-1,0
BOT
0,17.1663333333333
V
0,0.1068115234375
V
-1,0
BOT
0,17.173
V
0,-0.00476837158203125
V
-1,0
BOT
0,17.1796666666667
V
0,-0.110149383544922
V
-1,0
BOT
0,17.1863333333333
V
0,-0.208377838134766
V
-1,0
BOT
0,17.193
V
0,-0.299930572509766
V
-1,0
BOT
0,17.1996666666667
V
0,-0.384807586669922
V
-1,0
BOT
0,17.2063333333333
V
0,-0.461101531982422
V
-1,0
BOT
0,17.213
V
0,-0.528335571289063
V
-1,0
BOT
0,17.2196666666667
V
0,-0.588417053222656
V
-1,0
BOT
0,17.2263333333333
V
0,-0.644683837890625
V
-1,0
BOT
0,17.233
V
0,-0.697135925292969
V
-1,0
BOT
0,17.2396666666667
V
0,-0.746250152587891
V
-1,0
BOT
0,17.2463333333333
V
0,-0.792980194091797
V
-1,0
BOT
0,17.253
V
0,-0.837326049804688
V
-1,0
BOT
0,17.2596666666667
V
0,-0.879287719726563
V
-1,0
BOT
0,17.2663333333333
V
0,-0.916957855224609
V
-1,0
BOT
0,17.273
V
0,-0.950813293457031
V
-1,0
BOT
0,17.2796666666667
V
0,-0.982761383056641
V
-1,0
BOT
0,17.2863333333333
V
0,-1.01566314697266
V
-1,0
BOT
0,17.293
V
0,-1.04856491088867
V
-1,0
BOT
0,17.2996666666667
V
0,-1.07908248901367
V
-1,0
BOT
0,17.3063333333333
V
0,-1.10721588134766
V
-1,0
BOT
0,17.313
V
0,-1.13439559936523
V
-1,0
BOT
0,17.3196666666667
V
0,-1.16205215454102
V
-1,0
BOT
0,17.3263333333333
V
0,-1.18780136108398
V
-1,0
BOT
0,17.333
V
0,-1.20925903320312
V
-1,0
BOT
0,17.3396666666667
V
0,-1.22833251953125
V
-1,0
BOT
0,17.3463333333333
V
0,-1.24597549438477
V
-1,0
BOT
0,17.353
V
0,-1.26266479492187
V
-1,0
BOT
0,17.3596666666667
V
0,-1.27553939819336
V
-1,0
BOT
0,17.3663333333333
V
0,-1.28507614135742
V
-1,0
BOT
0,17.373
V
0,-1.29365921020508
V
-1,0
BOT
0,17.3796666666667
V
0,-1.30414962768555
V
-1,0
BOT
0,17.3863333333333
V
0,-1.31607055664062
V
-1,0
BOT
0,17.393
V
0,-1.32369995117187
V
-1,0
BOT
0,17.3996666666667
V
0,-1.32560729980469
V
-1,0
BOT
0,17.4063333333333
V
0,-1.32226943969727
V
-1,0
BOT
0,17.413
V
0,-1.31654739379883
V
-1,0
BOT
0,17.4196666666667
V
0,-1.30939483642578
V
-1,0
BOT
0,17.4263333333333
V
0,-1.29795074462891
V
-1,0
BOT
0,17.433
V
0,-1.28412246704102
V
-1,0
BOT
0,17.4396666666667
V
0,-1.26934051513672
V
-1,0
BOT
0,17.4463333333333
V
0,-1.25503540039062
V
-1,0
BOT
0,17.453
V
0,-1.23834609985352
V
-1,0
BOT
0,17.4596666666667
V
0,-1.21784210205078
V
-1,0
BOT
0,17.4663333333333
V
0,-1.19304656982422
V
-1,0
BOT
0,17.473
V
0,-1.16825103759766
V
-1,0
BOT
0,17.4796666666667
V
0,-1.14297866821289
V
-1,0
BOT
0,17.4863333333333
V
0,-1.11722946166992
V
-1,0
BOT
0,17.493
V
0,-1.08814239501953
V
-1,0
BOT
0,17.4996666666667
V
0,-1.05714797973633
V
-1,0
BOT
0,17.5063333333333
V
0,-1.02567672729492
V
-1,0
BOT
0,17.513
V
0,-0.994205474853516
V
-1,0
BOT
0,17.5196666666667
V
0,-0.962734222412109
V
-1,0
BOT
0,17.5263333333333
V
0,-0.932216644287109
V
-1,0
BOT
0,17.533
V
0,-0.902652740478516
V
-1,0
BOT
0,17.5396666666667
V
0,-0.873088836669922
V
-1,0
BOT
0,17.5463333333333
V
0,-0.841617584228516
V
-1,0
BOT
0,17.553
V
0,-0.808238983154297
V
-1,0
BOT
0,17.5596666666667
V
0,-0.773429870605469
V
-1,0
BOT
0,17.5663333333333
V
0,-0.736713409423828
V
-1,0
BOT
0,17.573
V
0,-0.700950622558594
V
-1,0
BOT
0,17.5796666666667
V
0,-0.667572021484375
V
-1,0
BOT
0,17.5863333333333
V
0,-0.638961791992188
V
-1,0
BOT
0,17.593
V
0,-0.613689422607422
V
-1,0
BOT
0,17.5996666666667
V
0,-0.591278076171875
V
-1,0
BOT
0,17.6063333333333
V
0,-0.569820404052734
V
-1,0
BOT
0,17.613
V
0,-0.547409057617188
V
-1,0
BOT
0,17.6196666666667
V
0,-0.525951385498047
V
-1,0
BOT
0,17.6263333333333
V
0,-0.505447387695313
V
-1,0
BOT
0,17.633
V
0,-0.487804412841797
V
-1,0
BOT
0,17.6396666666667
V
0,-0.474452972412109
V
-1,0
BOT
0,17.6463333333333
V
0,-0.464916229248047
V
-1,0
BOT
0,17.653
V
0,-0.458717346191406
V
-1,0
BOT
0,17.6596666666667
V
0,-0.453472137451172
V
-1,0
BOT
0,17.6663333333333
V
0,-0.449180603027344
V
-1,0
BOT
0,17.673
V
0,-0.445842742919922
V
-1,0
BOT
0,17.6796666666667
V
0,-0.443458557128906
V
-1,0
BOT
0,17.6863333333333
V
0,-0.441074371337891
V
-1,0
BOT
0,17.693
V
0,-0.439167022705078
V
-1,0
BOT
0,17.6996666666667
V
0,-0.440597534179688
V
-1,0
BOT
0,17.7063333333333
V
0,-0.444889068603516
V
-1,0
BOT
0,17.713
V
0,-0.453472137451172
V
-1,0
BOT
0,17.7196666666667
V
0,-0.464916229248047
V
-1,0
BOT
0,17.7263333333333
V
0,-0.48065185546875
V
-1,0
BOT
0,17.733
V
0,-0.499725341796875
V
-1,0
BOT
0,17.7396666666667
V
0,-0.520229339599609
V
-1,0
BOT
0,17.7463333333333
V
0,-0.542163848876953
V
-1,0
BOT
0,17.753
V
0,-0.564098358154297
V
-1,0
BOT
0,17.7596666666667
V
0,-0.584602355957031
V
-1,0
BOT
0,17.7663333333333
V
0,-0.605106353759766
V
-1,0
BOT
0,17.773
V
0,-0.626087188720703
V
-1,0
BOT
0,17.7796666666667
V
0,-0.648021697998047
V
-1,0
BOT
0,17.7863333333333
V
0,-0.668048858642578
V
-1,0
BOT
0,17.793
V
0,-0.686168670654297
V
-1,0
BOT
0,17.7996666666667
V
0,-0.706195831298828
V
-1,0
BOT
0,17.8063333333333
V
0,-0.728130340576172
V
-1,0
BOT
0,17.813
V
0,-0.750064849853516
V
-1,0
BOT
0,17.8196666666667
V
0,-0.773429870605469
V
-1,0
BOT
0,17.8263333333333
V
0,-0.796794891357422
V
-1,0
BOT
0,17.833
V
0,-0.819206237792969
V
-1,0
BOT
0,17.8396666666667
V
0,-0.840187072753906
V
-1,0
BOT
0,17.8463333333333
V
0,-0.860691070556641
V
-1,0
BOT
0,17.853
V
0,-0.880241394042969
V
-1,0
BOT
0,17.8596666666667
V
0,-0.895977020263672
V
-1,0
BOT
0,17.8663333333333
V
0,-0.908374786376953
V
-1,0
BOT
0,17.873
V
0,-0.921249389648438
V
-1,0
BOT
0,17.8796666666667
V
0,-0.935077667236328
V
-1,0
BOT
0,17.8863333333333
V
0,-0.946998596191406
V
-1,0
BOT
0,17.893
V
0,-0.957489013671875
V
-1,0
BOT
0,17.8996666666667
V
0,-0.969409942626953
V
-1,0
BOT
0,17.9063333333333
V
0,-0.985145568847656
V
-1,0
BOT
0,17.913
V
0,-1.00040435791016
V
-1,0
BOT
0,17.9196666666667
V
0,-1.01518630981445
V
-1,0
BOT
0,17.9263333333333
V
0,-1.02949142456055
V
-1,0
BOT
0,17.933
V
0,-1.04522705078125
V
-1,0
BOT
0,17.9396666666667
V
0,-1.06287002563477
V
-1,0
BOT
0,17.9463333333333
V
0,-1.08003616333008
V
-1,0
BOT
0,17.953
V
0,-1.0986328125
V
-1,0
BOT
0,17.9596666666667
V
0,-1.11913681030273
V
-1,0
BOT
0,17.9663333333333
V
0,-1.14202499389648
V
-1,0
BOT
0,17.973
V
0,-1.16729736328125
V
-1,0
BOT
0,17.9796666666667
V
0,-1.19304656982422
V
-1,0
BOT
0,17.9863333333333
V
0,-1.21974945068359
V
-1,0
BOT
0,17.993
V
0,-1.24931335449219
V
-1,0
BOT
0,17.9996666666667
V
0,-1.28030776977539
V
-1,0
BOT
0,18.0063333333333
V
0,-1.30844116210937
V
-1,0
BOT
0,18.013
V
0,-1.33562088012695
V
-1,0
BOT
0,18.0196666666667
V
0,-1.36327743530273
V
-1,0
BOT
0,18.0263333333333
V
0,-1.39284133911133
V
-1,0
BOT
0,18.033
V
0,-1.42192840576172
V
-1,0
BOT
0,18.0396666666667
V
0,-1.45053863525391
V
-1,0
BOT
0,18.0463333333333
V
0,-1.48153305053711
V
-1,0
BOT
0,18.053
V
0,-1.51395797729492
V
-1,0
BOT
0,18.0596666666667
V
0,-1.54638290405273
V
-1,0
BOT
0,18.0663333333333
V
0,-1.57594680786133
V
-1,0
BOT
0,18.073
V
0,-1.60360336303711
V
-1,0
BOT
0,18.0796666666667
V
0,-1.62887573242187
V
-1,0
BOT
0,18.0863333333333
V
0,-1.65176391601562
V
-1,0
BOT
0,18.093
V
0,-1.67322158813477
V
-1,0
BOT
0,18.0996666666667
V
0,-1.6932487487793
V
-1,0
BOT
0,18.1063333333333
V
0,-1.71232223510742
V
-1,0
BOT
0,18.113
V
0,-1.72758102416992
V
-1,0
BOT
0,18.1196666666667
V
0,-1.74093246459961
V
-1,0
BOT
0,18.1263333333333
V
0,-1.7542839050293
V
-1,0
BOT
0,18.133
V
0,-1.76620483398437
V
-1,0
BOT
0,18.1396666666667
V
0,-1.77621841430664
V
-1,0
BOT
0,18.1463333333333
V
0,-1.7848014831543
V
-1,0
BOT
0,18.153
V
0,-1.79672241210937
V
-1,0
BOT
0,18.1596666666667
V
0,-1.80768966674805
V
-1,0
BOT
0,18.1663333333333
V
0,-1.81484222412109
V
-1,0
BOT
0,18.173
V
0,-1.81913375854492
V
-1,0
BOT
0,18.1796666666667
V
0,-1.82104110717773
V
-1,0
BOT
0,18.1863333333333
V
0,-1.82056427001953
V
-1,0
BOT
0,18.193
V
0,-1.8162727355957
V
-1,0
BOT
0,18.1996666666667
V
0,-1.81007385253906
V
-1,0
BOT
0,18.2063333333333
V
0,-1.80578231811523
V
-1,0
BOT
0,18.213
V
0,-1.80387496948242
V
-1,0
BOT
0,18.2196666666667
V
0,-1.80292129516602
V
-1,0
BOT
0,18.2263333333333
V
0,-1.80292129516602
V
-1,0
BOT
0,18.233
V
0,-1.80292129516602
V
-1,0
BOT
0,18.2396666666667
V
0,-1.80196762084961
V
-1,0
BOT
0,18.2463333333333
V
0,-1.79815292358398
V
-1,0
BOT
0,18.253
V
0,-1.79147720336914
V
-1,0
BOT
0,18.2596666666667
V
0,-1.7848014831543
V
-1,0
BOT
0,18.2663333333333
V
0,-1.77955627441406
V
-1,0
BOT
0,18.273
V
0,-1.77717208862305
V
-1,0
BOT
0,18.2796666666667
V
0,-1.77574157714844
V
-1,0
BOT
0,18.2863333333333
V
0,-1.77383422851562
V
-1,0
BOT
0,18.293
V
0,-1.77192687988281
V
-1,0
BOT
0,18.2996666666667
V
0,-1.76763534545898
V
-1,0
BOT
0,18.3063333333333
V
0,-1.76048278808594
V
-1,0
BOT
0,18.313
V
0,-1.75094604492187
V
-1,0
BOT
0,18.3196666666667
V
0,-1.74045562744141
V
-1,0
BOT
0,18.3263333333333
V
0,-1.72901153564453
V
-1,0
BOT
0,18.333
V
0,-1.71613693237305
V
-1,0
BOT
0,18.3396666666667
V
0,-1.70516967773437
V
-1,0
BOT
0,18.3463333333333
V
0,-1.69610977172852
V
-1,0
BOT
0,18.353
V
0,-1.68752670288086
V
-1,0
BOT
0,18.3596666666667
V
0,-1.6789436340332
V
-1,0
BOT
0,18.3663333333333
V
0,-1.67179107666016
V
-1,0
BOT
0,18.373
V
0,-1.66654586791992
V
-1,0
BOT
0,18.3796666666667
V
0,-1.66225433349609
V
-1,0
BOT
0,18.3863333333333
V
0,-1.65891647338867
V
-1,0
BOT
0,18.393
V
0,-1.65510177612305
V
-1,0
BOT
0,18.3996666666667
V
0,-1.65462493896484
V
-1,0
BOT
0,18.4063333333333
V
0,-1.65796279907227
V
-1,0
BOT
0,18.413
V
0,-1.66463851928711
V
-1,0
BOT
0,18.4196666666667
V
0,-1.67274475097656
V
-1,0
BOT
0,18.4263333333333
V
0,-1.68132781982422
V
-1,0
BOT
0,18.433
V
0,-1.6932487487793
V
-1,0
BOT
0,18.4396666666667
V
0,-1.70469284057617
V
-1,0
BOT
0,18.4463333333333
V
0,-1.71518325805664
V
-1,0
BOT
0,18.453
V
0,-1.72519683837891
V
-1,0
BOT
0,18.4596666666667
V
0,-1.73521041870117
V
-1,0
BOT
0,18.4663333333333
V
0,-1.74474716186523
V
-1,0
BOT
0,18.473
V
0,-1.75333023071289
V
-1,0
BOT
0,18.4796666666667
V
0,-1.76429748535156
V
-1,0
BOT
0,18.4863333333333
V
0,-1.77669525146484
V
-1,0
BOT
0,18.493
V
0,-1.78956985473633
V
-1,0
BOT
0,18.4996666666667
V
0,-1.8010139465332
V
-1,0
BOT
0,18.5063333333333
V
0,-1.81198120117187
V
-1,0
BOT
0,18.513
V
0,-1.82533264160156
V
-1,0
BOT
0,18.5196666666667
V
0,-1.83868408203125
V
-1,0
BOT
0,18.5263333333333
V
0,-1.85155868530273
V
-1,0
BOT
0,18.533
V
0,-1.86300277709961
V
-1,0
BOT
0,18.5396666666667
V
0,-1.87587738037109
V
-1,0
BOT
0,18.5463333333333
V
0,-1.8925666809082
V
-1,0
BOT
0,18.553
V
0,-1.91164016723633
V
-1,0
BOT
0,18.5596666666667
V
0,-1.93166732788086
V
-1,0
BOT
0,18.5663333333333
V
0,-1.95026397705078
V
-1,0
BOT
0,18.573
V
0,-1.9683837890625
V
-1,0
BOT
0,18.5796666666667
V
0,-1.98698043823242
V
-1,0
BOT
0,18.5863333333333
V
0,-2.00462341308594
V
-1,0
BOT
0,18.593
V
0,-2.02274322509766
V
-1,0
BOT
0,18.5996666666667
V
0,-2.04038619995117
V
-1,0
BOT
0,18.6063333333333
V
0,-2.0604133605957
V
-1,0
BOT
0,18.613
V
0,-2.08044052124023
V
-1,0
BOT
0,18.6196666666667
V
0,-2.09951400756836
V
-1,0
BOT
0,18.6263333333333
V
0,-2.11429595947266
V
-1,0
BOT
0,18.633
V
0,-2.12335586547852
V
-1,0
BOT
0,18.6396666666667
V
0,-2.12955474853516
V
-1,0
BOT
0,18.6463333333333
V
0,-2.1357536315918
V
-1,0
BOT
0,18.653
V
0,-2.14195251464844
V
-1,0
BOT
0,18.6596666666667
V
0,-2.14719772338867
V
-1,0
BOT
0,18.6663333333333
V
0,-2.15482711791992
V
-1,0
BOT
0,18.673
V
0,-2.16579437255859
V
-1,0
BOT
0,18.6796666666667
V
0,-2.17628479003906
V
-1,0
BOT
0,18.6863333333333
V
0,-2.18486785888672
V
-1,0
BOT
0,18.693
V
0,-2.19154357910156
V
-1,0
BOT
0,18.6996666666667
V
0,-2.1977424621582
V
-1,0
BOT
0,18.7063333333333
V
0,-2.20251083374023
V
-1,0
BOT
0,18.713
V
0,-2.20394134521484
V
-1,0
BOT
0,18.7196666666667
V
0,-2.20584869384766
V
-1,0
BOT
0,18.7263333333333
V
0,-2.20775604248047
V
-1,0
BOT
0,18.733
V
0,-2.21014022827148
V
-1,0
BOT
0,18.7396666666667
V
0,-2.21395492553711
V
-1,0
BOT
0,18.7463333333333
V
0,-2.21872329711914
V
-1,0
BOT
0,18.753
V
0,-2.22301483154297
V
-1,0
BOT
0,18.7596666666667
V
0,-2.22396850585937
V
-1,0
BOT
0,18.7663333333333
V
0,-2.22110748291016
V
-1,0
BOT
0,18.773
V
0,-2.21490859985352
V
-1,0
BOT
0,18.7796666666667
V
0,-2.20584869384766
V
-1,0
BOT
0,18.7863333333333
V
0,-2.19440460205078
V
-1,0
BOT
0,18.793
V
0,-2.18105316162109
V
-1,0
BOT
0,18.7996666666667
V
0,-2.16770172119141
V
-1,0
BOT
0,18.8063333333333
V
0,-2.15578079223633
V
-1,0
BOT
0,18.813
V
0,-2.14433670043945
V
-1,0
BOT
0,18.8196666666667
V
0,-2.12955474853516
V
-1,0
BOT
0,18.8263333333333
V
0,-2.11334228515625
V
-1,0
BOT
0,18.833
V
0,-2.09474563598633
V
-1,0
BOT
0,18.8396666666667
V
0,-2.07328796386719
V
-1,0
BOT
0,18.8463333333333
V
0,-2.04753875732422
V
-1,0
BOT
0,18.853
V
0,-2.02131271362305
V
-1,0
BOT
0,18.8596666666667
V
0,-1.99556350708008
V
-1,0
BOT
0,18.8663333333333
V
0,-1.96981430053711
V
-1,0
BOT
0,18.873
V
0,-1.94501876831055
V
-1,0
BOT
0,18.8796666666667
V
0,-1.91926956176758
V
-1,0
BOT
0,18.8863333333333
V
0,-1.89208984375
V
-1,0
BOT
0,18.893
V
0,-1.86061859130859
V
-1,0
BOT
0,18.8996666666667
V
0,-1.82533264160156
V
-1,0
BOT
0,18.9063333333333
V
0,-1.7857551574707
V
-1,0
BOT
0,18.913
V
0,-1.74331665039062
V
-1,0
BOT
0,18.9196666666667
V
0,-1.69658660888672
V
-1,0
BOT
0,18.9263333333333
V
0,-1.64651870727539
V
-1,0
BOT
0,18.933
V
0,-1.59358978271484
V
-1,0
BOT
0,18.9396666666667
V
0,-1.53732299804687
V
-1,0
BOT
0,18.9463333333333
V
0,-1.47914886474609
V
-1,0
BOT
0,18.953
V
0,-1.41525268554687
V
-1,0
BOT
0,18.9596666666667
V
0,-1.34420394897461
V
-1,0
BOT
0,18.9663333333333
V
0,-1.26552581787109
V
-1,0
BOT
0,18.973
V
0,-1.18017196655273
V
-1,0
BOT
0,18.9796666666667
V
0,-1.08480453491211
V
-1,0
BOT
0,18.9863333333333
V
0,-0.975131988525391
V
-1,0
BOT
0,18.993
V
0,-0.848293304443359
V
-1,0
BOT
0,18.9996666666667
V
0,-0.702857971191406
V
-1,0
BOT
0,19.0063333333333
V
0,-0.535011291503906
V
-1,0
BOT
0,19.013
V
0,-0.335216522216797
V
-1,0
BOT
0,19.0196666666667
V
0,-0.0958442687988281
V
-1,0
BOT
0,19.0263333333333
V
0,0.193119049072266
V
-1,0
BOT
0,19.033
V
0,0.537872314453125
V
-1,0
BOT
0,19.0396666666667
V
0,0.948905944824219
V
-1,0
BOT
0,19.0463333333333
V
0,1.44004821777344
V
-1,0
BOT
0,19.053
V
0,2.02512741088867
V
-1,0
BOT
0,19.0596666666667
V
0,2.72464752197266
V
-1,0
BOT
0,19.0663333333333
V
0,3.55720520019531
V
-1,0
BOT
0,19.073
V
0,4.54568862915039
V
-1,0
BOT
0,19.0796666666667
V
0,5.71203231811523
V
-1,0
BOT
0,19.0863333333333
V
0,7.07817077636719
V
-1,0
BOT
0,19.093
V
0,8.66222381591797
V
-1,0
BOT
0,19.0996666666667
V
0,10.4751586914062
V
-1,0
BOT
0,19.1063333333333
V
0,12.5298500061035
V
-1,0
BOT
0,19.113
V
0,14.8320198059082
V
-1,0
BOT
0,19.1196666666667
V
0,17.3840522766113
V
-1,0
BOT
0,19.1263333333333
V
0,20.1759338378906
V
-1,0
BOT
0,19.133
V
0,23.1904983520508
V
-1,0
BOT
0,19.1396666666667
V
0,26.4067649841309
V
-1,0
BOT
0,19.1463333333333
V
0,29.7946929931641
V
-1,0
BOT
0,19.153
V
0,33.3113670349121
V
-1,0
BOT
0,19.1596666666667
V
0,36.9105339050293
V
-1,0
BOT
0,19.1663333333333
V
0,40.5406951904297
V
-1,0
BOT
0,19.173
V
0,44.1513061523438
V
-1,0
BOT
0,19.1796666666667
V
0,47.6913452148438
V
-1,0
BOT
0,19.1863333333333
V
0,51.1088371276856
V
-1,0
BOT
0,19.193
V
0,54.354190826416
V
-1,0
BOT
0,19.1996666666667
V
0,57.3830604553223
V
-1,0
BOT
0,19.2063333333333
V
0,60.1587295532227
V
-1,0
BOT
0,19.213
V
0,62.6497268676758
V
-1,0
BOT
0,19.2196666666667
V
0,64.8274421691895
V
-1,0
BOT
0,19.2263333333333
V
0,66.6713714599609
V
-1,0
BOT
0,19.233
V
0,68.1724548339844
V
-1,0
BOT
0,19.2396666666667
V
0,69.3259239196777
V
-1,0
BOT
0,19.2463333333333
V
0,70.1332092285156
V
-1,0
BOT
0,19.253
V
0,70.5995559692383
V
-1,0
BOT
0,19.2596666666667
V
0,70.7378387451172
V
-1,0
BOT
0,19.2663333333333
V
0,70.5628395080566
V
-1,0
BOT
0,19.273
V
0,70.0902938842773
V
-1,0
BOT
0,19.2796666666667
V
0,69.3416595458984
V
-1,0
BOT
0,19.2863333333333
V
0,68.3355331420898
V
-1,0
BOT
0,19.293
V
0,67.0943260192871
V
-1,0
BOT
0,19.2996666666667
V
0,65.6414031982422
V
-1,0
BOT
0,19.3063333333333
V
0,64.0015602111816
V
-1,0
BOT
0,19.313
V
0,62.2000694274902
V
-1,0
BOT
0,19.3196666666667
V
0,60.2588653564453
V
-1,0
BOT
0,19.3263333333333
V
0,58.2032203674316
V
-1,0
BOT
0,19.333
V
0,56.0579299926758
V
-1,0
BOT
0,19.3396666666667
V
0,53.8411140441895
V
-1,0
BOT
0,19.3463333333333
V
0,51.5732765197754
V
-1,0
BOT
0,19.353
V
0,49.2706298828125
V
-1,0
BOT
0,19.3596666666667
V
0,46.9532012939453
V
-1,0
BOT
0,19.3663333333333
V
0,44.6324348449707
V
-1,0
BOT
0,19.373
V
0,42.3240661621094
V
-1,0
BOT
0,19.3796666666667
V
0,40.0409698486328
V
-1,0
BOT
0,19.3863333333333
V
0,37.7936363220215
V
-1,0
BOT
0,19.393
V
0,35.5935096740723
V
-1,0
BOT
0,19.3996666666667
V
0,33.4453582763672
V
-1,0
BOT
0,19.4063333333333
V
0,31.3582420349121
V
-1,0
BOT
0,19.413
V
0,29.3393135070801
V
-1,0
BOT
0,19.4196666666667
V
0,27.3947715759277
V
-1,0
BOT
0,19.4263333333333
V
0,25.5289077758789
V
-1,0
BOT
0,19.433
V
0,23.74267578125
V
-1,0
BOT
0,19.4396666666667
V
0,22.0417976379395
V
-1,0
BOT
0,19.4463333333333
V
0,20.4267501831055
V
-1,0
BOT
0,19.453
V
0,18.8956260681152
V
-1,0
BOT
0,19.4596666666667
V
0,17.4460411071777
V
-1,0
BOT
0,19.4663333333333
V
0,16.0760879516602
V
-1,0
BOT
0,19.473
V
0,14.7871971130371
V
-1,0
BOT
0,19.4796666666667
V
0,13.580322265625
V
-1,0
BOT
0,19.4863333333333
V
0,12.453556060791
V
-1,0
BOT
0,19.493
V
0,11.4021301269531
V
-1,0
BOT
0,19.4996666666667
V
0,10.4241371154785
V
-1,0
BOT
0,19.5063333333333
V
0,9.51433181762695
V
-1,0
BOT
0,19.513
V
0,8.66937637329102
V
-1,0
BOT
0,19.5196666666667
V
0,7.88593292236328
V
-1,0
BOT
0,19.5263333333333
V
0,7.16209411621094
V
-1,0
BOT
0,19.533
V
0,6.49356842041016
V
-1,0
BOT
0,19.5396666666667
V
0,5.87654113769531
V
-1,0
BOT
0,19.5463333333333
V
0,5.31148910522461
V
-1,0
BOT
0,19.553
V
0,4.79507446289063
V
-1,0
BOT
0,19.5596666666667
V
0,4.32062149047852
V
-1,0
BOT
0,19.5663333333333
V
0,3.88288497924805
V
-1,0
BOT
0,19.573
V
0,3.48091125488281
V
-1,0
BOT
0,19.5796666666667
V
0,3.11279296875
V
-1,0
BOT
0,19.5863333333333
V
0,2.77376174926758
V
-1,0
BOT
0,19.593
V
0,2.46191024780273
V
-1,0
BOT
0,19.5996666666667
V
0,2.17437744140625
V
-1,0
BOT
0,19.6063333333333
V
0,1.90973281860352
V
-1,0
BOT
0,19.613
V
0,1.66606903076172
V
-1,0
BOT
0,19.6196666666667
V
0,1.44147872924805
V
-1,0
BOT
0,19.6263333333333
V
0,1.23405456542969
V
-1,0
BOT
0,19.633
V
0,1.04427337646484
V
-1,0
BOT
0,19.6396666666667
V
0,0.871181488037109
V
-1,0
BOT
0,19.6463333333333
V
0,0.711441040039063
V
-1,0
BOT
0,19.653
V
0,0.564098358154297
V
-1,0
BOT
0,19.6596666666667
V
0,0.427722930908203
V
-1,0
BOT
0,19.6663333333333
V
0,0.299930572509766
V
-1,0
BOT
0,19.673
V
0,0.176429748535156
V
-1,0
BOT
0,19.6796666666667
V
0,0.057220458984375
V
-1,0
BOT
0,19.6863333333333
V
0,-0.0538825988769531
V
-1,0
BOT
0,19.693
V
0,-0.156879425048828
V
-1,0
BOT
0,19.6996666666667
V
0,-0.253200531005859
V
-1,0
BOT
0,19.7063333333333
V
0,-0.341415405273437
V
-1,0
BOT
0,19.713
V
0,-0.421524047851563
V
-1,0
BOT
0,19.7196666666667
V
0,-0.495433807373047
V
-1,0
BOT
0,19.7263333333333
V
0,-0.566959381103516
V
-1,0
BOT
0,19.733
V
0,-0.637054443359375
V
-1,0
BOT
0,19.7396666666667
V
0,-0.703811645507813
V
-1,0
BOT
0,19.7463333333333
V
0,-0.767230987548828
V
-1,0
BOT
0,19.753
V
0,-0.826835632324219
V
-1,0
BOT
0,19.7596666666667
V
0,-0.886440277099609
V
-1,0
BOT
0,19.7663333333333
V
0,-0.945568084716797
V
-1,0
BOT
0,19.773
V
0,-1.00326538085937
V
-1,0
BOT
0,19.7796666666667
V
0,-1.05857849121094
V
-1,0
BOT
0,19.7863333333333
V
0,-1.11103057861328
V
-1,0
BOT
0,19.793
V
0,-1.16157531738281
V
-1,0
BOT
0,19.7996666666667
V
0,-1.20735168457031
V
-1,0
BOT
0,19.8063333333333
V
0,-1.24883651733398
V
-1,0
BOT
0,19.813
V
0,-1.28650665283203
V
-1,0
BOT
0,19.8196666666667
V
0,-1.31893157958984
V
-1,0
BOT
0,19.8263333333333
V
0,-1.34944915771484
V
-1,0
BOT
0,19.833
V
0,-1.37615203857422
V
-1,0
BOT
0,19.8396666666667
V
0,-1.40094757080078
V
-1,0
BOT
0,19.8463333333333
V
0,-1.42288208007812
V
-1,0
BOT
0,19.853
V
0,-1.44004821777344
V
-1,0
BOT
0,19.8596666666667
V
0,-1.45483016967773
V
-1,0
BOT
0,19.8663333333333
V
0,-1.46770477294922
V
-1,0
BOT
0,19.873
V
0,-1.47771835327148
V
-1,0
BOT
0,19.8796666666667
V
0,-1.48296356201172
V
-1,0
BOT
0,19.8863333333333
V
0,-1.48296356201172
V
-1,0
BOT
0,19.893
V
0,-1.4805793762207
V
-1,0
BOT
0,19.8996666666667
V
0,-1.47438049316406
V
-1,0
BOT
0,19.9063333333333
V
0,-1.46389007568359
V
-1,0
BOT
0,19.913
V
0,-1.45101547241211
V
-1,0
BOT
0,19.9196666666667
V
0,-1.43575668334961
V
-1,0
BOT
0,19.9263333333333
V
0,-1.4190673828125
V
-1,0
BOT
0,19.933
V
0,-1.39856338500977
V
-1,0
BOT
0,19.9396666666667
V
0,-1.3737678527832
V
-1,0
BOT
0,19.9463333333333
V
0,-1.34611129760742
V
-1,0
BOT
0,19.953
V
0,-1.31416320800781
V
-1,0
BOT
0,19.9596666666667
V
0,-1.27887725830078
V
-1,0
BOT
0,19.9663333333333
V
0,-1.23786926269531
V
-1,0
BOT
0,19.973
V
0,-1.19447708129883
V
-1,0
BOT
0,19.9796666666667
V
0,-1.15156173706055
V
-1,0
BOT
0,19.9863333333333
V
0,-1.10673904418945
V
-1,0
BOT
0,19.993
V
0,-1.05857849121094
V
-1,0
BOT
0,19.9996666666667
V
0,-1.00612640380859
V
-1,0
BOT
0,20.0063333333333
V
0,-0.950813293457031
V
-1,0
BOT
0,20.013
V
0,-0.892162322998047
V
-1,0
BOT
0,20.0196666666667
V
0,-0.829219818115234
V
-1,0
BOT
0,20.0263333333333
V
0,-0.765323638916016
V
-1,0
BOT
0,20.033
V
0,-0.702381134033203
V
-1,0
BOT
0,20.0396666666667
V
0,-0.638484954833984
V
-1,0
BOT
0,20.0463333333333
V
0,-0.574588775634766
V
-1,0
BOT
0,20.053
V
0,-0.513076782226563
V
-1,0
BOT
0,20.0596666666667
V
0,-0.452518463134766
V
-1,0
BOT
0,20.0663333333333
V
0,-0.392436981201172
V
-1,0
BOT
0,20.073
V
0,-0.334262847900391
V
-1,0
BOT
0,20.0796666666667
V
0,-0.281810760498047
V
-1,0
BOT
0,20.0863333333333
V
0,-0.236034393310547
V
-1,0
BOT
0,20.093
V
0,-0.195980072021484
V
-1,0
BOT
0,20.0996666666667
V
0,-0.161647796630859
V
-1,0
BOT
0,20.1063333333333
V
0,-0.132083892822266
V
-1,0
BOT
0,20.113
V
0,-0.108242034912109
V
-1,0
BOT
0,20.1196666666667
V
0,-0.0905990600585938
V
-1,0
BOT
0,20.1263333333333
V
0,-0.0786781311035156
V
-1,0
BOT
0,20.133
V
0,-0.0734329223632813
V
-1,0
BOT
0,20.1396666666667
V
0,-0.0758171081542969
V
-1,0
BOT
0,20.1463333333333
V
0,-0.0886917114257813
V
-1,0
BOT
0,20.153
V
0,-0.108242034912109
V
-1,0
BOT
0,20.1596666666667
V
0,-0.132083892822266
V
-1,0
BOT
0,20.1663333333333
V
0,-0.159740447998047
V
-1,0
BOT
0,20.173
V
0,-0.195026397705078
V
-1,0
BOT
0,20.1796666666667
V
0,-0.234603881835937
V
-1,0
BOT
0,20.1863333333333
V
0,-0.274658203125
V
-1,0
BOT
0,20.193
V
0,-0.315666198730469
V
-1,0
BOT
0,20.1996666666667
V
0,-0.360965728759766
V
-1,0
BOT
0,20.2063333333333
V
0,-0.4119873046875
V
-1,0
BOT
0,20.213
V
0,-0.46539306640625
V
-1,0
BOT
0,20.2196666666667
V
0,-0.518798828125
V
-1,0
BOT
0,20.2263333333333
V
0,-0.574588775634766
V
-1,0
BOT
0,20.233
V
0,-0.632286071777344
V
-1,0
BOT
0,20.2396666666667
V
0,-0.688552856445313
V
-1,0
BOT
0,20.2463333333333
V
0,-0.739097595214844
V
-1,0
BOT
0,20.253
V
0,-0.785350799560547
V
-1,0
BOT
0,20.2596666666667
V
0,-0.83160400390625
V
-1,0
BOT
0,20.2663333333333
V
0,-0.879764556884766
V
-1,0
BOT
0,20.273
V
0,-0.930309295654297
V
-1,0
BOT
0,20.2796666666667
V
0,-0.983238220214844
V
-1,0
BOT
0,20.2863333333333
V
0,-1.03950500488281
V
-1,0
BOT
0,20.293
V
0,-1.09386444091797
V
-1,0
BOT
0,20.2996666666667
V
0,-1.14202499389648
V
-1,0
BOT
0,20.3063333333333
V
0,-1.18207931518555
V
-1,0
BOT
0,20.313
V
0,-1.21593475341797
V
-1,0
BOT
0,20.3196666666667
V
0,-1.24454498291016
V
-1,0
BOT
0,20.3263333333333
V
0,-1.26791000366211
V
-1,0
BOT
0,20.333
V
0,-1.29032135009766
V
-1,0
BOT
0,20.3396666666667
V
0,-1.31130218505859
V
-1,0
BOT
0,20.3463333333333
V
0,-1.33180618286133
V
-1,0
BOT
0,20.353
V
0,-1.34944915771484
V
-1,0
BOT
0,20.3596666666667
V
0,-1.36280059814453
V
-1,0
BOT
0,20.3663333333333
V
0,-1.3737678527832
V
-1,0
BOT
0,20.373
V
0,-1.38235092163086
V
-1,0
BOT
0,20.3796666666667
V
0,-1.39141082763672
V
-1,0
BOT
0,20.3863333333333
V
0,-1.39951705932617
V
-1,0
BOT
0,20.393
V
0,-1.41096115112305
V
-1,0
BOT
0,20.3996666666667
V
0,-1.42431259155273
V
-1,0
BOT
0,20.4063333333333
V
0,-1.43766403198242
V
-1,0
BOT
0,20.413
V
0,-1.44624710083008
V
-1,0
BOT
0,20.4196666666667
V
0,-1.45101547241211
V
-1,0
BOT
0,20.4263333333333
V
0,-1.45435333251953
V
-1,0
BOT
0,20.433
V
0,-1.45578384399414
V
-1,0
BOT
0,20.4396666666667
V
0,-1.45339965820312
V
-1,0
BOT
0,20.4463333333333
V
0,-1.44767761230469
V
-1,0
BOT
0,20.453
V
0,-1.43957138061523
V
-1,0
BOT
0,20.4596666666667
V
0,-1.42860412597656
V
-1,0
BOT
0,20.4663333333333
V
0,-1.41143798828125
V
-1,0
BOT
0,20.473
V
0,-1.38616561889648
V
-1,0
BOT
0,20.4796666666667
V
0,-1.35421752929687
V
-1,0
BOT
0,20.4863333333333
V
0,-1.3117790222168
V
-1,0
BOT
0,20.493
V
0,-1.25646591186523
V
-1,0
BOT
0,20.4996666666667
V
0,-1.18541717529297
V
-1,0
BOT
0,20.5063333333333
V
0,-1.09577178955078
V
-1,0
BOT
0,20.513
V
0,-0.982761383056641
V
-1,0
BOT
0,20.5196666666667
V
0,-0.843048095703125
V
-1,0
BOT
0,20.5263333333333
V
0,-0.675201416015625
V
-1,0
BOT
0,20.533
V
0,-0.474452972412109
V
-1,0
BOT
0,20.5396666666667
V
0,-0.236988067626953
V
-1,0
BOT
0,20.5463333333333
V
0,0.0424385070800781
V
-1,0
BOT
0,20.553
V
0,0.367641448974609
V
-1,0
BOT
0,20.5596666666667
V
0,0.743389129638672
V
-1,0
BOT
0,20.5663333333333
V
0,1.17254257202148
V
-1,0
BOT
0,20.573
V
0,1.65557861328125
V
-1,0
BOT
0,20.5796666666667
V
0,2.197265625
V
-1,0
BOT
0,20.5863333333333
V
0,2.79998779296875
V
-1,0
BOT
0,20.593
V
0,3.4637451171875
V
-1,0
BOT
0,20.5996666666667
V
0,4.18567657470703
V
-1,0
BOT
0,20.6063333333333
V
0,4.96578216552734
V
-1,0
BOT
0,20.613
V
0,5.80358505249023
V
-1,0
BOT
0,20.6196666666667
V
0,6.69431686401367
V
-1,0
BOT
0,20.6263333333333
V
0,7.6298713684082
V
-1,0
BOT
0,20.633
V
0,8.6064338684082
V
-1,0
BOT
0,20.6396666666667
V
0,9.61732864379883
V
-1,0
BOT
0,20.6463333333333
V
0,10.655403137207
V
-1,0
BOT
0,20.653
V
0,11.7077827453613
V
-1,0
BOT
0,20.6596666666667
V
0,12.7644538879395
V
-1,0
BOT
0,20.6663333333333
V
0,13.8154029846191
V
-1,0
BOT
0,20.673
V
0,14.8482322692871
V
-1,0
BOT
0,20.6796666666667
V
0,15.8534049987793
V
-1,0
BOT
0,20.6863333333333
V
0,16.8209075927734
V
-1,0
BOT
0,20.693
V
0,17.7440643310547
V
-1,0
BOT
0,20.6996666666667
V
0,18.6161994934082
V
-1,0
BOT
0,20.7063333333333
V
0,19.4268226623535
V
-1,0
BOT
0,20.713
V
0,20.169734954834
V
-1,0
BOT
0,20.7196666666667
V
0,20.8392143249512
V
-1,0
BOT
0,20.7263333333333
V
0,21.4290618896484
V
-1,0
BOT
0,20.733
V
0,21.9354629516602
V
-1,0
BOT
0,20.7396666666667
V
0,22.3541259765625
V
-1,0
BOT
0,20.7463333333333
V
0,22.6874351501465
V
-1,0
BOT
0,20.753
V
0,22.9339599609375
V
-1,0
BOT
0,20.7596666666667
V
0,23.097038269043
V
-1,0
BOT
0,20.7663333333333
V
0,23.1795310974121
V
-1,0
BOT
0,20.773
V
0,23.1842994689941
V
-1,0
BOT
0,20.7796666666667
V
0,23.1142044067383
V
-1,0
BOT
0,20.7863333333333
V
0,22.9744911193848
V
-1,0
BOT
0,20.793
V
0,22.7704048156738
V
-1,0
BOT
0,20.7996666666667
V
0,22.5038528442383
V
-1,0
BOT
0,20.8063333333333
V
0,22.1776962280273
V
-1,0
BOT
0,20.813
V
0,21.7957496643066
V
-1,0
BOT
0,20.8196666666667
V
0,21.364688873291
V
-1,0
BOT
0,20.8263333333333
V
0,20.8883285522461
V
-1,0
BOT
0,20.833
V
0,20.3719139099121
V
-1,0
BOT
0,20.8396666666667
V
0,19.8211669921875
V
-1,0
BOT
0,20.8463333333333
V
0,19.2451477050781
V
-1,0
BOT
0,20.853
V
0,18.6467170715332
V
-1,0
BOT
0,20.8596666666667
V
0,18.0301666259766
V
-1,0
BOT
0,20.8663333333333
V
0,17.3978805541992
V
-1,0
BOT
0,20.873
V
0,16.756534576416
V
-1,0
BOT
0,20.8796666666667
V
0,16.1080360412598
V
-1,0
BOT
0,20.8863333333333
V
0,15.4533386230469
V
-1,0
BOT
0,20.893
V
0,14.7953033447266
V
-1,0
BOT
0,20.8996666666667
V
0,14.1382217407227
V
-1,0
BOT
0,20.9063333333333
V
0,13.4844779968262
V
-1,0
BOT
0,20.913
V
0,12.8340721130371
V
-1,0
BOT
0,20.9196666666667
V
0,12.1908187866211
V
-1,0
BOT
0,20.9263333333333
V
0,11.5599632263184
V
-1,0
BOT
0,20.933
V
0,10.9424591064453
V
-1,0
BOT
0,20.9396666666667
V
0,10.340690612793
V
-1,0
BOT
0,20.9463333333333
V
0,9.75513458251953
V
-1,0
BOT
0,20.953
V
0,9.18817520141602
V
-1,0
BOT
0,20.9596666666667
V
0,8.63790512084961
V
-1,0
BOT
0,20.9663333333333
V
0,8.10480117797852
V
-1,0
BOT
0,20.973
V
0,7.59077072143555
V
-1,0
BOT
0,20.9796666666667
V
0,7.0948600769043
V
-1,0
BOT
0,20.9863333333333
V
0,6.61993026733398
V
-1,0
BOT
0,20.993
V
0,6.16645812988281
V
-1,0
BOT
0,20.9996666666667
V
0,5.73635101318359
V
-1,0
BOT
0,21.0063333333333
V
0,5.32960891723633
V
-1,0
BOT
0,21.013
V
0,4.94384765625
V
-1,0
BOT
0,21.0196666666667
V
0,4.58002090454102
V
-1,0
BOT
0,21.0263333333333
V
0,4.23574447631836
V
-1,0
BOT
0,21.033
V
0,3.91149520874023
V
-1,0
BOT
0,21.0396666666667
V
0,3.60345840454102
V
-1,0
BOT
0,21.0463333333333
V
0,3.3111572265625
V
-1,0
BOT
0,21.053
V
0,3.03411483764648
V
-1,0
BOT
0,21.0596666666667
V
0,2.77280807495117
V
-1,0
BOT
0,21.0663333333333
V
0,2.52676010131836
V
-1,0
BOT
0,21.073
V
0,2.29310989379883
V
-1,0
BOT
0,21.0796666666667
V
0,2.07233428955078
V
-1,0
BOT
0,21.0863333333333
V
0,1.86491012573242
V
-1,0
BOT
0,21.093
V
0,1.67036056518555
V
-1,0
BOT
0,21.0996666666667
V
0,1.48630142211914
V
-1,0
BOT
0,21.1063333333333
V
0,1.3117790222168
V
-1,0
BOT
0,21.113
V
0,1.14727020263672
V
-1,0
BOT
0,21.1196666666667
V
0,0.992298126220703
V
-1,0
BOT
0,21.1263333333333
V
0,0.844001770019531
V
-1,0
BOT
0,21.133
V
0,0.699996948242188
V
-1,0
BOT
0,21.1396666666667
V
0,0.560760498046875
V
-1,0
BOT
0,21.1463333333333
V
0,0.429630279541016
V
-1,0
BOT
0,21.153
V
0,0.304698944091797
V
-1,0
BOT
0,21.1596666666667
V
0,0.184059143066406
V
-1,0
BOT
0,21.1663333333333
V
0,0.06866455078125
V
-1,0
BOT
0,21.173
V
0,-0.041961669921875
V
-1,0
BOT
0,21.1796666666667
V
0,-0.149250030517578
V
-1,0
BOT
0,21.1863333333333
V
0,-0.256538391113281
V
-1,0
BOT
0,21.193
V
0,-0.361919403076172
V
-1,0
BOT
0,21.1996666666667
V
0,-0.463962554931641
V
-1,0
BOT
0,21.2063333333333
V
0,-0.563621520996094
V
-1,0
BOT
0,21.213
V
0,-0.659942626953125
V
-1,0
BOT
0,21.2196666666667
V
0,-0.752925872802734
V
-1,0
BOT
0,21.2263333333333
V
0,-0.841617584228516
V
-1,0
BOT
0,21.233
V
0,-0.927448272705078
V
-1,0
BOT
0,21.2396666666667
V
0,-1.01327896118164
V
-1,0
BOT
0,21.2463333333333
V
0,-1.09767913818359
V
-1,0
BOT
0,21.253
V
0,-1.18112564086914
V
-1,0
BOT
0,21.2596666666667
V
0,-1.25980377197266
V
-1,0
BOT
0,21.2663333333333
V
0,-1.33705139160156
V
-1,0
BOT
0,21.273
V
0,-1.41239166259766
V
-1,0
BOT
0,21.2796666666667
V
0,-1.48534774780273
V
-1,0
BOT
0,21.2863333333333
V
0,-1.5559196472168
V
-1,0
BOT
0,21.293
V
0,-1.62506103515625
V
-1,0
BOT
0,21.2996666666667
V
0,-1.69563293457031
V
-1,0
BOT
0,21.3063333333333
V
0,-1.76525115966797
V
-1,0
BOT
0,21.313
V
0,-1.8315315246582
V
-1,0
BOT
0,21.3196666666667
V
0,-1.89352035522461
V
-1,0
BOT
0,21.3263333333333
V
0,-1.95217132568359
V
-1,0
BOT
0,21.333
V
0,-2.00605392456055
V
-1,0
BOT
0,21.3396666666667
V
0,-2.05612182617187
V
-1,0
BOT
0,21.3463333333333
V
0,-2.10428237915039
V
-1,0
BOT
0,21.353
V
0,-2.15387344360352
V
-1,0
BOT
0,21.3596666666667
V
0,-2.20394134521484
V
-1,0
BOT
0,21.3663333333333
V
0,-2.25114822387695
V
-1,0
BOT
0,21.373
V
0,-2.29644775390625
V
-1,0
BOT
0,21.3796666666667
V
0,-2.34127044677734
V
-1,0
BOT
0,21.3863333333333
V
0,-2.38323211669922
V
-1,0
BOT
0,21.393
V
0,-2.42137908935547
V
-1,0
BOT
0,21.3996666666667
V
0,-2.4571418762207
V
-1,0
BOT
0,21.4063333333333
V
0,-2.49576568603516
V
-1,0
BOT
0,21.413
V
0,-2.53391265869141
V
-1,0
BOT
0,21.4196666666667
V
0,-2.56967544555664
V
-1,0
BOT
0,21.4263333333333
V
0,-2.60591506958008
V
-1,0
BOT
0,21.433
V
0,-2.64406204223633
V
-1,0
BOT
0,21.4396666666667
V
0,-2.67982482910156
V
-1,0
BOT
0,21.4463333333333
V
0,-2.70986557006836
V
-1,0
BOT
0,21.453
V
0,-2.73799896240234
V
-1,0
BOT
0,21.4596666666667
V
0,-2.76613235473633
V
-1,0
BOT
0,21.4663333333333
V
0,-2.79140472412109
V
-1,0
BOT
0,21.473
V
0,-2.81333923339844
V
-1,0
BOT
0,21.4796666666667
V
0,-2.83336639404297
V
-1,0
BOT
0,21.4863333333333
V
0,-2.85482406616211
V
-1,0
BOT
0,21.493
V
0,-2.87580490112305
V
-1,0
BOT
0,21.4996666666667
V
0,-2.89535522460937
V
-1,0
BOT
0,21.5063333333333
V
0,-2.91299819946289
V
-1,0
BOT
0,21.513
V
0,-2.9301643371582
V
-1,0
BOT
0,21.5196666666667
V
0,-2.94589996337891
V
-1,0
BOT
0,21.5263333333333
V
0,-2.9606819152832
V
-1,0
BOT
0,21.533
V
0,-2.97307968139648
V
-1,0
BOT
0,21.5396666666667
V
0,-2.98118591308594
V
-1,0
BOT
0,21.5463333333333
V
0,-2.98452377319336
V
-1,0
BOT
0,21.553
V
0,-2.98500061035156
V
-1,0
BOT
0,21.5596666666667
V
0,-2.98452377319336
V
-1,0
BOT
0,21.5663333333333
V
0,-2.98309326171875
V
-1,0
BOT
0,21.573
V
0,-2.98118591308594
V
-1,0
BOT
0,21.5796666666667
V
0,-2.98213958740234
V
-1,0
BOT
0,21.5863333333333
V
0,-2.98547744750977
V
-1,0
BOT
0,21.593
V
0,-2.98881530761719
V
-1,0
BOT
0,21.5996666666667
V
0,-2.9902458190918
V
-1,0
BOT
0,21.6063333333333
V
0,-2.98929214477539
V
-1,0
BOT
0,21.613
V
0,-2.98500061035156
V
-1,0
BOT
0,21.6196666666667
V
0,-2.97832489013672
V
-1,0
BOT
0,21.6263333333333
V
0,-2.97164916992187
V
-1,0
BOT
0,21.633
V
0,-2.96592712402344
V
-1,0
BOT
0,21.6396666666667
V
0,-2.96115875244141
V
-1,0
BOT
0,21.6463333333333
V
0,-2.95495986938477
V
-1,0
BOT
0,21.653
V
0,-2.94637680053711
V
-1,0
BOT
0,21.6596666666667
V
0,-2.93779373168945
V
-1,0
BOT
0,21.6663333333333
V
0,-2.92825698852539
V
-1,0
BOT
0,21.673
V
0,-2.91633605957031
V
-1,0
BOT
0,21.6796666666667
V
0,-2.90107727050781
V
-1,0
BOT
0,21.6863333333333
V
0,-2.88534164428711
V
-1,0
BOT
0,21.693
V
0,-2.87246704101562
V
-1,0
BOT
0,21.6996666666667
V
0,-2.85863876342773
V
-1,0
BOT
0,21.7063333333333
V
0,-2.84481048583984
V
-1,0
BOT
0,21.713
V
0,-2.83098220825195
V
-1,0
BOT
0,21.7196666666667
V
0,-2.82096862792969
V
-1,0
BOT
0,21.7263333333333
V
0,-2.81238555908203
V
-1,0
BOT
0,21.733
V
0,-2.80380249023437
V
-1,0
BOT
0,21.7396666666667
V
0,-2.79474258422852
V
-1,0
BOT
0,21.7463333333333
V
0,-2.78568267822266
V
-1,0
BOT
0,21.753
V
0,-2.77805328369141
V
-1,0
BOT
0,21.7596666666667
V
0,-2.76803970336914
V
-1,0
BOT
0,21.7663333333333
V
0,-2.7613639831543
V
-1,0
BOT
0,21.773
V
0,-2.75945663452148
V
-1,0
BOT
0,21.7796666666667
V
0,-2.7613639831543
V
-1,0
BOT
0,21.7863333333333
V
0,-2.76327133178711
V
-1,0
BOT
0,21.793
V
0,-2.76374816894531
V
-1,0
BOT
0,21.7996666666667
V
0,-2.76756286621094
V
-1,0
BOT
0,21.8063333333333
V
0,-2.77280807495117
V
-1,0
BOT
0,21.813
V
0,-2.77376174926758
V
-1,0
BOT
0,21.8196666666667
V
0,-2.77280807495117
V
-1,0
BOT
0,21.8263333333333
V
0,-2.77423858642578
V
-1,0
BOT
0,21.833
V
0,-2.78091430664062
V
-1,0
BOT
0,21.8396666666667
V
0,-2.78854370117187
V
-1,0
BOT
0,21.8463333333333
V
0,-2.79712677001953
V
-1,0
BOT
0,21.853
V
0,-2.8076171875
V
-1,0
BOT
0,21.8596666666667
V
0,-2.81953811645508
V
-1,0
BOT
0,21.8663333333333
V
0,-2.83288955688477
V
-1,0
BOT
0,21.873
V
0,-2.84528732299805
V
-1,0
BOT
0,21.8796666666667
V
0,-2.85816192626953
V
-1,0
BOT
0,21.8863333333333
V
0,-2.86960601806641
V
-1,0
BOT
0,21.893
V
0,-2.88009643554687
V
-1,0
BOT
0,21.8996666666667
V
0,-2.88963317871094
V
-1,0
BOT
0,21.9063333333333
V
0,-2.89773941040039
V
-1,0
BOT
0,21.913
V
0,-2.90298461914062
V
-1,0
BOT
0,21.9196666666667
V
0,-2.90632247924805
V
-1,0
BOT
0,21.9263333333333
V
0,-2.91013717651367
V
-1,0
BOT
0,21.933
V
0,-2.91728973388672
V
-1,0
BOT
0,21.9396666666667
V
0,-2.92730331420898
V
-1,0
BOT
0,21.9463333333333
V
0,-2.93731689453125
V
-1,0
BOT
0,21.953
V
0,-2.94685363769531
V
-1,0
BOT
0,21.9596666666667
V
0,-2.95686721801758
V
-1,0
BOT
0,21.9663333333333
V
0,-2.96640396118164
V
-1,0
BOT
0,21.973
V
0,-2.97403335571289
V
-1,0
BOT
0,21.9796666666667
V
0,-2.97832489013672
V
-1,0
BOT
0,21.9863333333333
V
0,-2.98452377319336
V
-1,0
BOT
0,21.993
V
0,-2.99358367919922
V
-1,0
BOT
0,21.9996666666667
V
0,-3.00264358520508
V
-1,0
BOT
0,22.0063333333333
V
0,-3.00931930541992
V
-1,0
BOT
0,22.013
V
0,-3.01408767700195
V
-1,0
BOT
0,22.0196666666667
V
0,-3.01885604858398
V
-1,0
BOT
0,22.0263333333333
V
0,-3.02219390869141
V
-1,0
BOT
0,22.033
V
0,-3.02457809448242
V
-1,0
BOT
0,22.0396666666667
V
0,-3.02553176879883
V
-1,0
BOT
0,22.0463333333333
V
0,-3.02648544311523
V
-1,0
BOT
0,22.053
V
0,-3.02791595458984
V
-1,0
BOT
0,22.0596666666667
V
0,-3.02839279174805
V
-1,0
BOT
0,22.0663333333333
V
0,-3.02791595458984
V
-1,0
BOT
0,22.073
V
0,-3.02553176879883
V
-1,0
BOT
0,22.0796666666667
V
0,-3.02362442016602
V
-1,0
BOT
0,22.0863333333333
V
0,-3.02314758300781
V
-1,0
BOT
0,22.093
V
0,-3.02362442016602
V
-1,0
BOT
0,22.0996666666667
V
0,-3.02314758300781
V
-1,0
BOT
0,22.1063333333333
V
0,-3.02028656005859
V
-1,0
BOT
0,22.113
V
0,-3.01456451416016
V
-1,0
BOT
0,22.1196666666667
V
0,-3.0064582824707
V
-1,0
BOT
0,22.1263333333333
V
0,-2.99453735351562
V
-1,0
BOT
0,22.133
V
0,-2.97784805297852
V
-1,0
BOT
0,22.1396666666667
V
0,-2.95925140380859
V
-1,0
BOT
0,22.1463333333333
V
0,-2.94160842895508
V
-1,0
BOT
0,22.153
V
0,-2.92348861694336
V
-1,0
BOT
0,22.1596666666667
V
0,-2.90107727050781
V
-1,0
BOT
0,22.1663333333333
V
0,-2.87199020385742
V
-1,0
BOT
0,22.173
V
0,-2.83670425415039
V
-1,0
BOT
0,22.1796666666667
V
0,-2.79474258422852
V
-1,0
BOT
0,22.1863333333333
V
0,-2.74372100830078
V
-1,0
BOT
0,22.193
V
0,-2.68220901489258
V
-1,0
BOT
0,22.1996666666667
V
0,-2.6087760925293
V
-1,0
BOT
0,22.2063333333333
V
0,-2.52485275268555
V
-1,0
BOT
0,22.213
V
0,-2.43234634399414
V
-1,0
BOT
0,22.2196666666667
V
0,-2.32744216918945
V
-1,0
BOT
0,22.2263333333333
V
0,-2.20680236816406
V
-1,0
BOT
0,22.233
V
0,-2.06899642944336
V
-1,0
BOT
0,22.2396666666667
V
0,-1.91497802734375
V
-1,0
BOT
0,22.2463333333333
V
0,-1.74188613891602
V
-1,0
BOT
0,22.253
V
0,-1.54304504394531
V
-1,0
BOT
0,22.2596666666667
V
0,-1.31320953369141
V
-1,0
BOT
0,22.2663333333333
V
0,-1.05142593383789
V
-1,0
BOT
0,22.273
V
0,-0.755786895751953
V
-1,0
BOT
0,22.2796666666667
V
0,-0.426292419433594
V
-1,0
BOT
0,22.2863333333333
V
0,-0.06103515625
V
-1,0
BOT
0,22.293
V
0,0.340938568115234
V
-1,0
BOT
0,22.2996666666667
V
0,0.780105590820313
V
-1,0
BOT
0,22.3063333333333
V
0,1.25646591186523
V
-1,0
BOT
0,22.313
V
0,1.77001953125
V
-1,0
BOT
0,22.3196666666667
V
0,2.32553482055664
V
-1,0
BOT
0,22.3263333333333
V
0,2.92158126831055
V
-1,0
BOT
0,22.333
V
0,3.55625152587891
V
-1,0
BOT
0,22.3396666666667
V
0,4.22763824462891
V
-1,0
BOT
0,22.3463333333333
V
0,4.93478775024414
V
-1,0
BOT
0,22.353
V
0,5.67531585693359
V
-1,0
BOT
0,22.3596666666667
V
0,6.44397735595703
V
-1,0
BOT
0,22.3663333333333
V
0,7.23648071289063
V
-1,0
BOT
0,22.373
V
0,8.04805755615234
V
-1,0
BOT
0,22.3796666666667
V
0,8.87298583984375
V
-1,0
BOT
0,22.3863333333333
V
0,9.7050666809082
V
-1,0
BOT
0,22.393
V
0,10.5366706848145
V
-1,0
BOT
0,22.3996666666667
V
0,11.3620758056641
V
-1,0
BOT
0,22.4063333333333
V
0,12.1760368347168
V
-1,0
BOT
0,22.413
V
0,12.9728317260742
V
-1,0
BOT
0,22.4196666666667
V
0,13.7434005737305
V
-1,0
BOT
0,22.4263333333333
V
0,14.4815444946289
V
-1,0
BOT
0,22.433
V
0,15.1853561401367
V
-1,0
BOT
0,22.4396666666667
V
0,15.8505439758301
V
-1,0
BOT
0,22.4463333333333
V
0,16.474723815918
V
-1,0
BOT
0,22.453
V
0,17.0507431030273
V
-1,0
BOT
0,22.4596666666667
V
0,17.5776481628418
V
-1,0
BOT
0,22.4663333333333
V
0,18.0516242980957
V
-1,0
BOT
0,22.473
V
0,18.4683799743652
V
-1,0
BOT
0,22.4796666666667
V
0,18.8255310058594
V
-1,0
BOT
0,22.4863333333333
V
0,19.1187858581543
V
-1,0
BOT
0,22.493
V
0,19.3524360656738
V
-1,0
BOT
0,22.4996666666667
V
0,19.5274353027344
V
-1,0
BOT
0,22.5063333333333
V
0,19.6442604064941
V
-1,0
BOT
0,22.513
V
0,19.7067260742187
V
-1,0
BOT
0,22.5196666666667
V
0,19.7138786315918
V
-1,0
BOT
0,22.5263333333333
V
0,19.6690559387207
V
-1,0
BOT
0,22.533
V
0,19.5736885070801
V
-1,0
BOT
0,22.5396666666667
V
0,19.4311141967773
V
-1,0
BOT
0,22.5463333333333
V
0,19.2441940307617
V
-1,0
BOT
0,22.553
V
0,19.014835357666
V
-1,0
BOT
0,22.5596666666667
V
0,18.7468528747559
V
-1,0
BOT
0,22.5663333333333
V
0,18.4412002563477
V
-1,0
BOT
0,22.573
V
0,18.101692199707
V
-1,0
BOT
0,22.5796666666667
V
0,17.7288055419922
V
-1,0
BOT
0,22.5863333333333
V
0,17.3282623291016
V
-1,0
BOT
0,22.593
V
0,16.9024467468262
V
-1,0
BOT
0,22.5996666666667
V
0,16.4556503295898
V
-1,0
BOT
0,22.6063333333333
V
0,15.9950256347656
V
-1,0
BOT
0,22.613
V
0,15.5215263366699
V
-1,0
BOT
0,22.6196666666667
V
0,15.0370597839355
V
-1,0
BOT
0,22.6263333333333
V
0,14.5416259765625
V
-1,0
BOT
0,22.633
V
0,14.0385627746582
V
-1,0
BOT
0,22.6396666666667
V
0,13.5307312011719
V
-1,0
BOT
0,22.6463333333333
V
0,13.0190849304199
V
-1,0
BOT
0,22.653
V
0,12.5055313110352
V
-1,0
BOT
0,22.6596666666667
V
0,11.9929313659668
V
-1,0
BOT
0,22.6663333333333
V
0,11.4827156066895
V
-1,0
BOT
0,22.673
V
0,10.9772682189941
V
-1,0
BOT
0,22.6796666666667
V
0,10.4770660400391
V
-1,0
BOT
0,22.6863333333333
V
0,9.98210906982422
V
-1,0
BOT
0,22.693
V
0,9.49525833129883
V
-1,0
BOT
0,22.6996666666667
V
0,9.0174674987793
V
-1,0
BOT
0,22.7063333333333
V
0,8.55255126953125
V
-1,0
BOT
0,22.713
V
0,8.09955596923828
V
-1,0
BOT
0,22.7196666666667
V
0,7.6594352722168
V
-1,0
BOT
0,22.7263333333333
V
0,7.2321891784668
V
-1,0
BOT
0,22.733
V
0,6.81829452514648
V
-1,0
BOT
0,22.7396666666667
V
0,6.41870498657227
V
-1,0
BOT
0,22.7463333333333
V
0,6.03199005126953
V
-1,0
BOT
0,22.753
V
0,5.65814971923828
V
-1,0
BOT
0,22.7596666666667
V
0,5.29813766479492
V
-1,0
BOT
0,22.7663333333333
V
0,4.95386123657227
V
-1,0
BOT
0,22.773
V
0,4.62627410888672
V
-1,0
BOT
0,22.7796666666667
V
0,4.31585311889648
V
-1,0
BOT
0,22.7863333333333
V
0,4.02212142944336
V
-1,0
BOT
0,22.793
V
0,3.74460220336914
V
-1,0
BOT
0,22.7996666666667
V
0,3.48281860351562
V
-1,0
BOT
0,22.8063333333333
V
0,3.23581695556641
V
-1,0
BOT
0,22.813
V
0,3.00407409667969
V
-1,0
BOT
0,22.8196666666667
V
0,2.78806686401367
V
-1,0
BOT
0,22.8263333333333
V
0,2.58779525756836
V
-1,0
BOT
0,22.833
V
0,2.40135192871094
V
-1,0
BOT
0,22.8396666666667
V
0,2.23016738891602
V
-1,0
BOT
0,22.8463333333333
V
0,2.07376480102539
V
-1,0
BOT
0,22.853
V
0,1.92975997924805
V
-1,0
BOT
0,22.8596666666667
V
0,1.79576873779297
V
-1,0
BOT
0,22.8663333333333
V
0,1.67083740234375
V
-1,0
BOT
0,22.873
V
0,1.55544281005859
V
-1,0
BOT
0,22.8796666666667
V
0,1.44815444946289
V
-1,0
BOT
0,22.8863333333333
V
0,1.34897232055664
V
-1,0
BOT
0,22.893
V
0,1.25598907470703
V
-1,0
BOT
0,22.8996666666667
V
0,1.16968154907227
V
-1,0
BOT
0,22.9063333333333
V
0,1.09243392944336
V
-1,0
BOT
0,22.913
V
0,1.02376937866211
V
-1,0
BOT
0,22.9196666666667
V
0,0.960350036621094
V
-1,0
BOT
0,22.9263333333333
V
0,0.900745391845703
V
-1,0
BOT
0,22.933
V
0,0.847816467285156
V
-1,0
BOT
0,22.9396666666667
V
0,0.796318054199219
V
-1,0
BOT
0,22.9463333333333
V
0,0.744819641113281
V
-1,0
BOT
0,22.953
V
0,0.693321228027344
V
-1,0
BOT
0,22.9596666666667
V
0,0.644683837890625
V
-1,0
BOT
0,22.9663333333333
V
0,0.597476959228516
V
-1,0
BOT
0,22.973
V
0,0.549793243408203
V
-1,0
BOT
0,22.9796666666667
V
0,0.504016876220703
V
-1,0
BOT
0,22.9863333333333
V
0,0.461578369140625
V
-1,0
BOT
0,22.993
V
0,0.418663024902344
V
-1,0
BOT
0,22.9996666666667
V
0,0.376701354980469
V
-1,0
BOT
0,23.0063333333333
V
0,0.338077545166016
V
-1,0
BOT
0,23.013
V
0,0.300407409667969
V
-1,0
BOT
0,23.0196666666667
V
0,0.2593994140625
V
-1,0
BOT
0,23.0263333333333
V
0,0.215530395507812
V
-1,0
BOT
0,23.033
V
0,0.169754028320312
V
-1,0
BOT
0,23.0396666666667
V
0,0.123023986816406
V
-1,0
BOT
0,23.0463333333333
V
0,0.0729560852050781
V
-1,0
BOT
0,23.053
V
0,0.0233650207519531
V
-1,0
BOT
0,23.0596666666667
V
0,-0.0257492065429687
V
-1,0
BOT
0,23.0663333333333
V
0,-0.0739097595214844
V
-1,0
BOT
0,23.073
V
0,-0.1220703125
V
-1,0
BOT
0,23.0796666666667
V
0,-0.170230865478516
V
-1,0
BOT
0,23.0863333333333
V
0,-0.218391418457031
V
-1,0
BOT
0,23.093
V
0,-0.26702880859375
V
-1,0
BOT
0,23.0996666666667
V
0,-0.311851501464844
V
-1,0
BOT
0,23.1063333333333
V
0,-0.354290008544922
V
-1,0
BOT
0,23.113
V
0,-0.397682189941406
V
-1,0
BOT
0,23.1196666666667
V
0,-0.442981719970703
V
-1,0
BOT
0,23.1263333333333
V
0,-0.490188598632813
V
-1,0
BOT
0,23.133
V
0,-0.538825988769531
V
-1,0
BOT
0,23.1396666666667
V
0,-0.592231750488281
V
-1,0
BOT
0,23.1463333333333
V
0,-0.64849853515625
V
-1,0
BOT
0,23.153
V
0,-0.701904296875
V
-1,0
BOT
0,23.1596666666667
V
0,-0.751495361328125
V
-1,0
BOT
0,23.1663333333333
V
0,-0.799655914306641
V
-1,0
BOT
0,23.173
V
0,-0.848293304443359
V
-1,0
BOT
0,23.1796666666667
V
0,-0.896930694580078
V
-1,0
BOT
0,23.1863333333333
V
0,-0.944137573242188
V
-1,0
BOT
0,23.193
V
0,-0.994205474853516
V
-1,0
BOT
0,23.1996666666667
V
0,-1.04570388793945
V
-1,0
BOT
0,23.2063333333333
V
0,-1.09720230102539
V
-1,0
BOT
0,23.213
V
0,-1.14774703979492
V
-1,0
BOT
0,23.2196666666667
V
0,-1.19829177856445
V
-1,0
BOT
0,23.2263333333333
V
0,-1.2516975402832
V
-1,0
BOT
0,23.233
V
0,-1.30414962768555
V
-1,0
BOT
0,23.2396666666667
V
0,-1.35374069213867
V
-1,0
BOT
0,23.2463333333333
V
0,-1.40094757080078
V
-1,0
BOT
0,23.253
V
0,-1.4500617980957
V
-1,0
BOT
0,23.2596666666667
V
0,-1.50060653686523
V
-1,0
BOT
0,23.2663333333333
V
0,-1.55162811279297
V
-1,0
BOT
0,23.273
V
0,-1.60455703735352
V
-1,0
BOT
0,23.2796666666667
V
0,-1.65843963623047
V
-1,0
BOT
0,23.2863333333333
V
0,-1.71089172363281
V
-1,0
BOT
0,23.293
V
0,-1.75809860229492
V
-1,0
BOT
0,23.2996666666667
V
0,-1.8010139465332
V
-1,0
BOT
0,23.3063333333333
V
0,-1.84011459350586
V
-1,0
BOT
0,23.313
V
0,-1.8773078918457
V
-1,0
BOT
0,23.3196666666667
V
0,-1.91640853881836
V
-1,0
BOT
0,23.3263333333333
V
0,-1.95789337158203
V
-1,0
BOT
0,23.333
V
0,-1.99985504150391
V
-1,0
BOT
0,23.3396666666667
V
0,-2.04133987426758
V
-1,0
BOT
0,23.3463333333333
V
0,-2.08187103271484
V
-1,0
BOT
0,23.353
V
0,-2.12240219116211
V
-1,0
BOT
0,23.3596666666667
V
0,-2.16007232666016
V
-1,0
BOT
0,23.3663333333333
V
0,-2.1967887878418
V
-1,0
BOT
0,23.373
V
0,-2.23398208618164
V
-1,0
BOT
0,23.3796666666667
V
0,-2.2730827331543
V
-1,0
BOT
0,23.3863333333333
V
0,-2.31170654296875
V
-1,0
BOT
0,23.393
V
0,-2.34699249267578
V
-1,0
BOT
0,23.3996666666667
V
0,-2.3798942565918
V
-1,0
BOT
0,23.4063333333333
V
0,-2.410888671875
V
-1,0
BOT
0,23.413
V
0,-2.4409294128418
V
-1,0
BOT
0,23.4196666666667
V
0,-2.46858596801758
V
-1,0
BOT
0,23.4263333333333
V
0,-2.49338150024414
V
-1,0
BOT
0,23.433
V
0,-2.51865386962891
V
-1,0
BOT
0,23.4396666666667
V
0,-2.54392623901367
V
-1,0
BOT
0,23.4463333333333
V
0,-2.56967544555664
V
-1,0
BOT
0,23.453
V
0,-2.59256362915039
V
-1,0
BOT
0,23.4596666666667
V
0,-2.61163711547852
V
-1,0
BOT
0,23.4663333333333
V
0,-2.63118743896484
V
-1,0
BOT
0,23.473
V
0,-2.65121459960937
V
-1,0
BOT
0,23.4796666666667
V
0,-2.67124176025391
V
-1,0
BOT
0,23.4863333333333
V
0,-2.68840789794922
V
-1,0
BOT
0,23.493
V
0,-2.70557403564453
V
-1,0
BOT
0,23.4996666666667
V
0,-2.72274017333984
V
-1,0
BOT
0,23.5063333333333
V
0,-2.73799896240234
V
-1,0
BOT
0,23.513
V
0,-2.75182723999023
V
-1,0
BOT
0,23.5196666666667
V
0,-2.76279449462891
V
-1,0
BOT
0,23.5263333333333
V
0,-2.77090072631836
V
-1,0
BOT
0,23.533
V
0,-2.77471542358398
V
-1,0
BOT
0,23.5396666666667
V
0,-2.7766227722168
V
-1,0
BOT
0,23.5463333333333
V
0,-2.77805328369141
V
-1,0
BOT
0,23.553
V
0,-2.77900695800781
V
-1,0
BOT
0,23.5596666666667
V
0,-2.77853012084961
V
-1,0
BOT
0,23.5663333333333
V
0,-2.777099609375
V
-1,0
BOT
0,23.573
V
0,-2.77566909790039
V
-1,0
BOT
0,23.5796666666667
V
0,-2.77376174926758
V
-1,0
BOT
0,23.5863333333333
V
0,-2.76899337768555
V
-1,0
BOT
0,23.593
V
0,-2.75945663452148
V
-1,0
BOT
0,23.5996666666667
V
0,-2.74801254272461
V
-1,0
BOT
0,23.6063333333333
V
0,-2.73418426513672
V
-1,0
BOT
0,23.613
V
0,-2.71892547607422
V
-1,0
BOT
0,23.6196666666667
V
0,-2.69937515258789
V
-1,0
BOT
0,23.6263333333333
V
0,-2.67648696899414
V
-1,0
BOT
0,23.633
V
0,-2.64930725097656
V
-1,0
BOT
0,23.6396666666667
V
0,-2.61640548706055
V
-1,0
BOT
0,23.6463333333333
V
0,-2.57682800292969
V
-1,0
BOT
0,23.653
V
0,-2.53152847290039
V
-1,0
BOT
0,23.6596666666667
V
0,-2.48193740844727
V
-1,0
BOT
0,23.6663333333333
V
0,-2.42519378662109
V
-1,0
BOT
0,23.673
V
0,-2.36034393310547
V
-1,0
BOT
0,23.6796666666667
V
0,-2.28977203369141
V
-1,0
BOT
0,23.6863333333333
V
0,-2.2125244140625
V
-1,0
BOT
0,23.693
V
0,-2.12717056274414
V
-1,0
BOT
0,23.6996666666667
V
0,-2.0289421081543
V
-1,0
BOT
0,23.7063333333333
V
0,-1.92022323608398
V
-1,0
BOT
0,23.713
V
0,-1.800537109375
V
-1,0
BOT
0,23.7196666666667
V
0,-1.67083740234375
V
-1,0
BOT
0,23.7263333333333
V
0,-1.53017044067383
V
-1,0
BOT
0,23.733
V
0,-1.37567520141602
V
-1,0
BOT
0,23.7396666666667
V
0,-1.20687484741211
V
-1,0
BOT
0,23.7463333333333
V
0,-1.0228157043457
V
-1,0
BOT
0,23.753
V
0,-0.824928283691406
V
-1,0
BOT
0,23.7596666666667
V
0,-0.614643096923828
V
-1,0
BOT
0,23.7663333333333
V
0,-0.389575958251953
V
-1,0
BOT
0,23.773
V
0,-0.151157379150391
V
-1,0
BOT
0,23.7796666666667
V
0,0.102043151855469
V
-1,0
BOT
0,23.7863333333333
V
0,0.365734100341797
V
-1,0
BOT
0,23.793
V
0,0.640392303466797
V
-1,0
BOT
0,23.7996666666667
V
0,0.927925109863281
V
-1,0
BOT
0,23.8063333333333
V
0,1.22499465942383
V
-1,0
BOT
0,23.813
V
0,1.52969360351562
V
-1,0
BOT
0,23.8196666666667
V
0,1.83629989624023
V
-1,0
BOT
0,23.8263333333333
V
0,2.14624404907227
V
-1,0
BOT
0,23.833
V
0,2.46191024780273
V
-1,0
BOT
0,23.8396666666667
V
0,2.78091430664062
V
-1,0
BOT
0,23.8463333333333
V
0,3.09991836547852
V
-1,0
BOT
0,23.853
V
0,3.41367721557617
V
-1,0
BOT
0,23.8596666666667
V
0,3.72409820556641
V
-1,0
BOT
0,23.8663333333333
V
0,4.03118133544922
V
-1,0
BOT
0,23.873
V
0,4.32825088500977
V
-1,0
BOT
0,23.8796666666667
V
0,4.61244583129883
V
-1,0
BOT
0,23.8863333333333
V
0,4.8823356628418
V
-1,0
BOT
0,23.893
V
0,5.14125823974609
V
-1,0
BOT
0,23.8996666666667
V
0,5.38492202758789
V
-1,0
BOT
0,23.9063333333333
V
0,5.60951232910156
V
-1,0
BOT
0,23.913
V
0,5.81121444702148
V
-1,0
BOT
0,23.9196666666667
V
0,5.99050521850586
V
-1,0
BOT
0,23.9263333333333
V
0,6.14833831787109
V
-1,0
BOT
0,23.933
V
0,6.28280639648438
V
-1,0
BOT
0,23.9396666666667
V
0,6.3929557800293
V
-1,0
BOT
0,23.9463333333333
V
0,6.47878646850586
V
-1,0
BOT
0,23.953
V
0,6.54506683349609
V
-1,0
BOT
0,23.9596666666667
V
0,6.591796875
V
-1,0
BOT
0,23.9663333333333
V
0,6.61802291870117
V
-1,0
BOT
0,23.973
V
0,6.622314453125
V
-1,0
BOT
0,23.9796666666667
V
0,6.60562515258789
V
-1,0
BOT
0,23.9863333333333
V
0,6.56890869140625
V
-1,0
BOT
0,23.993
V
0,6.51216506958008
V
-1,0
BOT
0,23.9996666666667
V
0,6.43444061279297
V
-1,0
BOT
0,24.0063333333333
V
0,6.33573532104492
V
-1,0
BOT
0,24.013
V
0,6.21891021728516
V
-1,0
BOT
0,24.0196666666667
V
0,6.08587265014648
V
-1,0
BOT
0,24.0263333333333
V
0,5.93757629394531
V
-1,0
BOT
0,24.033
V
0,5.77306747436523
V
-1,0
BOT
0,24.0396666666667
V
0,5.59616088867188
V
-1,0
BOT
0,24.0463333333333
V
0,5.41019439697266
V
-1,0
BOT
0,24.053
V
0,5.21707534790039
V
-1,0
BOT
0,24.0596666666667
V
0,5.01585006713867
V
-1,0
BOT
0,24.0663333333333
V
0,4.80794906616211
V
-1,0
BOT
0,24.073
V
0,4.59384918212891
V
-1,0
BOT
0,24.0796666666667
V
0,4.37307357788086
V
-1,0
BOT
0,24.0863333333333
V
0,4.14800643920898
V
-1,0
BOT
0,24.093
V
0,3.91721725463867
V
-1,0
BOT
0,24.0996666666667
V
0,3.68499755859375
V
-1,0
BOT
0,24.1063333333333
V
0,3.45087051391602
V
-1,0
BOT
0,24.113
V
0,3.21865081787109
V
-1,0
BOT
0,24.1196666666667
V
0,2.98833847045898
V
-1,0
BOT
0,24.1263333333333
V
0,2.76088714599609
V
-1,0
BOT
0,24.133
V
0,2.53820419311523
V
-1,0
BOT
0,24.1396666666667
V
0,2.31790542602539
V
-1,0
BOT
0,24.1463333333333
V
0,2.09951400756836
V
-1,0
BOT
0,24.153
V
0,1.88207626342773
V
-1,0
BOT
0,24.1596666666667
V
0,1.66797637939453
V
-1,0
BOT
0,24.1663333333333
V
0,1.45769119262695
V
-1,0
BOT
0,24.173
V
0,1.251220703125
V
-1,0
BOT
0,24.1796666666667
V
0,1.04904174804687
V
-1,0
BOT
0,24.1863333333333
V
0,0.852584838867188
V
-1,0
BOT
0,24.193
V
0,0.662803649902344
V
-1,0
BOT
0,24.1996666666667
V
0,0.477790832519531
V
-1,0
BOT
0,24.2063333333333
V
0,0.29754638671875
V
-1,0
BOT
0,24.213
V
0,0.121116638183594
V
-1,0
BOT
0,24.2196666666667
V
0,-0.0505447387695313
V
-1,0
BOT
0,24.2263333333333
V
0,-0.216960906982422
V
-1,0
BOT
0,24.233
V
0,-0.376224517822266
V
-1,0
BOT
0,24.2396666666667
V
0,-0.530242919921875
V
-1,0
BOT
0,24.2463333333333
V
0,-0.677108764648438
V
-1,0
BOT
0,24.253
V
0,-0.818252563476563
V
-1,0
BOT
0,24.2596666666667
V
0,-0.951766967773438
V
-1,0
BOT
0,24.2663333333333
V
0,-1.07765197753906
V
-1,0
BOT
0,24.273
V
0,-1.19733810424805
V
-1,0
BOT
0,24.2796666666667
V
0,-1.30939483642578
V
-1,0
BOT
0,24.2863333333333
V
0,-1.41620635986328
V
-1,0
BOT
0,24.293
V
0,-1.51777267456055
V
-1,0
BOT
0,24.2996666666667
V
0,-1.61409378051758
V
-1,0
BOT
0,24.3063333333333
V
0,-1.70421600341797
V
-1,0
BOT
0,24.313
V
0,-1.79052352905273
V
-1,0
BOT
0,24.3196666666667
V
0,-1.87349319458008
V
-1,0
BOT
0,24.3263333333333
V
0,-1.95074081420898
V
-1,0
BOT
0,24.333
V
0,-2.02322006225586
V
-1,0
BOT
0,24.3396666666667
V
0,-2.08806991577148
V
-1,0
BOT
0,24.3463333333333
V
0,-2.14910507202148
V
-1,0
BOT
0,24.353
V
0,-2.20584869384766
V
-1,0
BOT
0,24.3596666666667
V
0,-2.25639343261719
V
-1,0
BOT
0,24.3663333333333
V
0,-2.30121612548828
V
-1,0
BOT
0,24.373
V
0,-2.34079360961914
V
-1,0
BOT
0,24.3796666666667
V
0,-2.38037109375
V
-1,0
BOT
0,24.3863333333333
V
0,-2.41899490356445
V
-1,0
BOT
0,24.393
V
0,-2.45428085327148
V
-1,0
BOT
0,24.3996666666667
V
0,-2.4867057800293
V
-1,0
BOT
0,24.4063333333333
V
0,-2.5177001953125
V
-1,0
BOT
0,24.413
V
0,-2.5477409362793
V
-1,0
BOT
0,24.4196666666667
V
0,-2.57396697998047
V
-1,0
BOT
0,24.4263333333333
V
0,-2.59590148925781
V
-1,0
BOT
0,24.433
V
0,-2.61497497558594
V
-1,0
BOT
0,24.4396666666667
V
0,-2.63166427612305
V
-1,0
BOT
0,24.4463333333333
V
0,-2.64835357666016
V
-1,0
BOT
0,24.453
V
0,-2.66170501708984
V
-1,0
BOT
0,24.4596666666667
V
0,-2.67362594604492
V
-1,0
BOT
0,24.4663333333333
V
0,-2.6850700378418
V
-1,0
BOT
0,24.473
V
0,-2.69508361816406
V
-1,0
BOT
0,24.4796666666667
V
0,-2.70366668701172
V
-1,0
BOT
0,24.4863333333333
V
0,-2.70986557006836
V
-1,0
BOT
0,24.493
V
0,-2.7165412902832
V
-1,0
BOT
0,24.4996666666667
V
0,-2.72321701049805
V
-1,0
BOT
0,24.5063333333333
V
0,-2.72941589355469
V
-1,0
BOT
0,24.513
V
0,-2.73418426513672
V
-1,0
BOT
0,24.5196666666667
V
0,-2.73704528808594
V
-1,0
BOT
0,24.5263333333333
V
0,-2.73752212524414
V
-1,0
BOT
0,24.533
V
0,-2.73656845092773
V
-1,0
BOT
0,24.5396666666667
V
0,-2.73466110229492
V
-1,0
BOT
0,24.5463333333333
V
0,-2.7313232421875
V
-1,0
BOT
0,24.553
V
0,-2.72750854492187
V
-1,0
BOT
0,24.5596666666667
V
0,-2.72607803344727
V
-1,0
BOT
0,24.5663333333333
V
0,-2.72703170776367
V
-1,0
BOT
0,24.573
V
0,-2.72750854492187
V
-1,0
BOT
0,24.5796666666667
V
0,-2.72560119628906
V
-1,0
BOT
0,24.5863333333333
V
0,-2.72417068481445
V
-1,0
BOT
0,24.593
V
0,-2.72274017333984
V
-1,0
BOT
0,24.5996666666667
V
0,-2.72178649902344
V
-1,0
BOT
0,24.6063333333333
V
0,-2.71892547607422
V
-1,0
BOT
0,24.613
V
0,-2.71511077880859
V
-1,0
BOT
0,24.6196666666667
V
0,-2.71272659301758
V
-1,0
BOT
0,24.6263333333333
V
0,-2.71081924438477
V
-1,0
BOT
0,24.633
V
0,-2.70795822143555
V
-1,0
BOT
0,24.6396666666667
V
0,-2.7012825012207
V
-1,0
BOT
0,24.6463333333333
V
0,-2.69556045532227
V
-1,0
BOT
0,24.653
V
0,-2.69269943237305
V
-1,0
BOT
0,24.6596666666667
V
0,-2.69079208374023
V
-1,0
BOT
0,24.6663333333333
V
0,-2.69031524658203
V
-1,0
BOT
0,24.673
V
0,-2.69031524658203
V
-1,0
BOT
0,24.6796666666667
V
0,-2.69317626953125
V
-1,0
BOT
0,24.6863333333333
V
0,-2.69412994384766
V
-1,0
BOT
0,24.693
V
0,-2.69412994384766
V
-1,0
BOT
0,24.6996666666667
V
0,-2.69460678100586
V
-1,0
BOT
0,24.7063333333333
V
0,-2.69651412963867
V
-1,0
BOT
0,24.713
V
0,-2.69985198974609
V
-1,0
BOT
0,24.7196666666667
V
0,-2.70652770996094
V
-1,0
BOT
0,24.7263333333333
V
0,-2.71511077880859
V
-1,0
BOT
0,24.733
V
0,-2.72464752197266
V
-1,0
BOT
0,24.7396666666667
V
0,-2.73227691650391
V
-1,0
BOT
0,24.7463333333333
V
0,-2.73656845092773
V
-1,0
BOT
0,24.753
V
0,-2.73799896240234
V
-1,0
BOT
0,24.7596666666667
V
0,-2.73561477661133
V
-1,0
BOT
0,24.7663333333333
V
0,-2.7318000793457
V
-1,0
BOT
0,24.773
V
0,-2.72798538208008
V
-1,0
BOT
0,24.7796666666667
V
0,-2.72417068481445
V
-1,0
BOT
0,24.7863333333333
V
0,-2.72178649902344
V
-1,0
BOT
0,24.793
V
0,-2.71987915039062
V
-1,0
BOT
0,24.7996666666667
V
0,-2.716064453125
V
-1,0
BOT
0,24.8063333333333
V
0,-2.71034240722656
V
-1,0
BOT
0,24.813
V
0,-2.70271301269531
V
-1,0
BOT
0,24.8196666666667
V
0,-2.69460678100586
V
-1,0
BOT
0,24.8263333333333
V
0,-2.6850700378418
V
-1,0
BOT
0,24.833
V
0,-2.67314910888672
V
-1,0
BOT
0,24.8396666666667
V
0,-2.65693664550781
V
-1,0
BOT
0,24.8463333333333
V
0,-2.63738632202148
V
-1,0
BOT
0,24.853
V
0,-2.61354446411133
V
-1,0
BOT
0,24.8596666666667
V
0,-2.58541107177734
V
-1,0
BOT
0,24.8663333333333
V
0,-2.55250930786133
V
-1,0
BOT
0,24.873
V
0,-2.51531600952148
V
-1,0
BOT
0,24.8796666666667
V
0,-2.47383117675781
V
-1,0
BOT
0,24.8863333333333
V
0,-2.4256706237793
V
-1,0
BOT
0,24.893
V
0,-2.37321853637695
V
-1,0
BOT
0,24.8996666666667
V
0,-2.31599807739258
V
-1,0
BOT
0,24.9063333333333
V
0,-2.25448608398437
V
-1,0
BOT
0,24.913
V
0,-2.18820571899414
V
-1,0
BOT
0,24.9196666666667
V
0,-2.11954116821289
V
-1,0
BOT
0,24.9263333333333
V
0,-2.04992294311523
V
-1,0
BOT
0,24.933
V
0,-1.97649002075195
V
-1,0
BOT
0,24.9396666666667
V
0,-1.89733505249023
V
-1,0
BOT
0,24.9463333333333
V
0,-1.81055068969727
V
-1,0
BOT
0,24.953
V
0,-1.71899795532227
V
-1,0
BOT
0,24.9596666666667
V
0,-1.62553787231445
V
-1,0
BOT
0,24.9663333333333
V
0,-1.52826309204102
V
-1,0
BOT
0,24.973
V
0,-1.42717361450195
V
-1,0
BOT
0,24.9796666666667
V
0,-1.32560729980469
V
-1,0
BOT
0,24.9863333333333
V
0,-1.22594833374023
V
-1,0
BOT
0,24.993
V
0,-1.1286735534668
V
-1,0
BOT
0,24.9996666666667
V
0,-1.02949142456055
V
-1,0
BOT
0,25.0063333333333
V
0,-0.927925109863281
V
-1,0
BOT
0,25.013
V
0,-0.826358795166016
V
-1,0
BOT
0,25.0196666666667
V
0,-0.722885131835938
V
-1,0
BOT
0,25.0263333333333
V
0,-0.617504119873047
V
-1,0
BOT
0,25.033
V
0,-0.512123107910156
V
-1,0
BOT
0,25.0396666666667
V
0,-0.410079956054688
V
-1,0
BOT
0,25.0463333333333
V
0,-0.313282012939453
V
-1,0
BOT
0,25.053
V
0,-0.220298767089844
V
-1,0
BOT
0,25.0596666666667
V
0,-0.131130218505859
V
-1,0
BOT
0,25.0663333333333
V
0,-0.0491142272949219
V
-1,0
BOT
0,25.073
V
0,0.0271797180175781
V
-1,0
BOT
0,25.0796666666667
V
0,0.0982284545898438
V
-1,0
BOT
0,25.0863333333333
V
0,0.163078308105469
V
-1,0
BOT
0,25.093
V
0,0.219345092773437
V
-1,0
BOT
0,25.0996666666667
V
0,0.267505645751953
V
-1,0
BOT
0,25.1063333333333
V
0,0.309944152832031
V
-1,0
BOT
0,25.113
V
0,0.347614288330078
V
-1,0
BOT
0,25.1196666666667
V
0,0.380516052246094
V
-1,0
BOT
0,25.1263333333333
V
0,0.408649444580078
V
-1,0
BOT
0,25.133
V
0,0.432491302490234
V
-1,0
BOT
0,25.1396666666667
V
0,0.45013427734375
V
-1,0
BOT
0,25.1463333333333
V
0,0.458240509033203
V
-1,0
BOT
0,25.153
V
0,0.458717346191406
V
-1,0
BOT
0,25.1596666666667
V
0,0.454425811767578
V
-1,0
BOT
0,25.1663333333333
V
0,0.445365905761719
V
-1,0
BOT
0,25.173
V
0,0.430107116699219
V
-1,0
BOT
0,25.1796666666667
V
0,0.408172607421875
V
-1,0
BOT
0,25.1863333333333
V
0,0.381946563720703
V
-1,0
BOT
0,25.193
V
0,0.349521636962891
V
-1,0
BOT
0,25.1996666666667
V
0,0.309467315673828
V
-1,0
BOT
0,25.2063333333333
V
0,0.260829925537109
V
-1,0
BOT
0,25.213
V
0,0.20599365234375
V
-1,0
BOT
0,25.2196666666667
V
0,0.149726867675781
V
-1,0
BOT
0,25.2263333333333
V
0,0.091552734375
V
-1,0
BOT
0,25.233
V
0,0.0314712524414062
V
-1,0
BOT
0,25.2396666666667
V
0,-0.030517578125
V
-1,0
BOT
0,25.2463333333333
V
0,-0.0934600830078125
V
-1,0
BOT
0,25.253
V
0,-0.156879425048828
V
-1,0
BOT
0,25.2596666666667
V
0,-0.219821929931641
V
-1,0
BOT
0,25.2663333333333
V
0,-0.283241271972656
V
-1,0
BOT
0,25.273
V
0,-0.347614288330078
V
-1,0
BOT
0,25.2796666666667
V
0,-0.414371490478516
V
-1,0
BOT
0,25.2863333333333
V
0,-0.483512878417969
V
-1,0
BOT
0,25.293
V
0,-0.555038452148438
V
-1,0
BOT
0,25.2996666666667
V
0,-0.630378723144531
V
-1,0
BOT
0,25.3063333333333
V
0,-0.70953369140625
V
-1,0
BOT
0,25.313
V
0,-0.791072845458984
V
-1,0
BOT
0,25.3196666666667
V
0,-0.870227813720703
V
-1,0
BOT
0,25.3263333333333
V
0,-0.946521759033203
V
-1,0
BOT
0,25.333
V
0,-1.01995468139648
V
-1,0
BOT
0,25.3396666666667
V
0,-1.09004974365234
V
-1,0
BOT
0,25.3463333333333
V
0,-1.15633010864258
V
-1,0
BOT
0,25.353
V
0,-1.2211799621582
V
-1,0
BOT
0,25.3596666666667
V
0,-1.28555297851562
V
-1,0
BOT
0,25.3663333333333
V
0,-1.35135650634766
V
-1,0
BOT
0,25.373
V
0,-1.4195442199707
V
-1,0
BOT
0,25.3796666666667
V
0,-1.48916244506836
V
-1,0
BOT
0,25.3863333333333
V
0,-1.55830383300781
V
-1,0
BOT
0,25.393
V
0,-1.62696838378906
V
-1,0
BOT
0,25.3996666666667
V
0,-1.69515609741211
V
-1,0
BOT
0,25.4063333333333
V
0,-1.76095962524414
V
-1,0
BOT
0,25.413
V
0,-1.82485580444336
V
-1,0
BOT
0,25.4196666666667
V
0,-1.88922882080078
V
-1,0
BOT
0,25.4263333333333
V
0,-1.95550918579102
V
-1,0
BOT
0,25.433
V
0,-2.02131271362305
V
-1,0
BOT
0,25.4396666666667
V
0,-2.08473205566406
V
-1,0
BOT
0,25.4463333333333
V
0,-2.14767456054687
V
-1,0
BOT
0,25.453
V
0,-2.21014022827148
V
-1,0
BOT
0,25.4596666666667
V
0,-2.27165222167969
V
-1,0
BOT
0,25.4663333333333
V
0,-2.33030319213867
V
-1,0
BOT
0,25.473
V
0,-2.38704681396484
V
-1,0
BOT
0,25.4796666666667
V
0,-2.44665145874023
V
-1,0
BOT
0,25.4863333333333
V
0,-2.51007080078125
V
-1,0
BOT
0,25.493
V
0,-2.57301330566406
V
-1,0
BOT
0,25.4996666666667
V
0,-2.63452529907227
V
-1,0
BOT
0,25.5063333333333
V
0,-2.69603729248047
V
-1,0
BOT
0,25.513
V
0,-2.75802612304687
V
-1,0
BOT
0,25.5196666666667
V
0,-2.81715393066406
V
-1,0
BOT
0,25.5263333333333
V
0,-2.87151336669922
V
-1,0
BOT
0,25.533
V
0,-2.92253494262695
V
-1,0
BOT
0,25.5396666666667
V
0,-2.97451019287109
V
-1,0
BOT
0,25.5463333333333
V
0,-3.02505493164062
V
-1,0
BOT
0,25.553
V
0,-3.07321548461914
V
-1,0
BOT
0,25.5596666666667
V
0,-3.12089920043945
V
-1,0
BOT
0,25.5663333333333
V
0,-3.16715240478516
V
-1,0
BOT
0,25.573
V
0,-3.21292877197266
V
-1,0
BOT
0,25.5796666666667
V
0,-3.25441360473633
V
-1,0
BOT
0,25.5863333333333
V
0,-3.29256057739258
V
-1,0
BOT
0,25.593
V
0,-3.32880020141602
V
-1,0
BOT
0,25.5996666666667
V
0,-3.36313247680664
V
-1,0
BOT
0,25.6063333333333
V
0,-3.39651107788086
V
-1,0
BOT
0,25.613
V
0,-3.42798233032227
V
-1,0
BOT
0,25.6196666666667
V
0,-3.45754623413086
V
-1,0
BOT
0,25.6263333333333
V
0,-3.48758697509766
V
-1,0
BOT
0,25.633
V
0,-3.51572036743164
V
-1,0
BOT
0,25.6396666666667
V
0,-3.54194641113281
V
-1,0
BOT
0,25.6463333333333
V
0,-3.56340408325195
V
-1,0
BOT
0,25.653
V
0,-3.58200073242187
V
-1,0
BOT
0,25.6596666666667
V
0,-3.60012054443359
V
-1,0
BOT
0,25.6663333333333
V
0,-3.6163330078125
V
-1,0
BOT
0,25.673
V
0,-3.63445281982422
V
-1,0
BOT
0,25.6796666666667
V
0,-3.65304946899414
V
-1,0
BOT
0,25.6863333333333
V
0,-3.67403030395508
V
-1,0
BOT
0,25.693
V
0,-3.69644165039062
V
-1,0
BOT
0,25.6996666666667
V
0,-3.71932983398437
V
-1,0
BOT
0,25.7063333333333
V
0,-3.74269485473633
V
-1,0
BOT
0,25.713
V
0,-3.76319885253906
V
-1,0
BOT
0,25.7196666666667
V
0,-3.78036499023437
V
-1,0
BOT
0,25.7263333333333
V
0,-3.79467010498047
V
-1,0
BOT
0,25.733
V
0,-3.80611419677734
V
-1,0
BOT
0,25.7396666666667
V
0,-3.81660461425781
V
-1,0
BOT
0,25.7463333333333
V
0,-3.82518768310547
V
-1,0
BOT
0,25.753
V
0,-3.83281707763672
V
-1,0
BOT
0,25.7596666666667
V
0,-3.83996963500977
V
-1,0
BOT
0,25.7663333333333
V
0,-3.84902954101562
V
-1,0
BOT
0,25.773
V
0,-3.86142730712891
V
-1,0
BOT
0,25.7796666666667
V
0,-3.8752555847168
V
-1,0
BOT
0,25.7863333333333
V
0,-3.88813018798828
V
-1,0
BOT
0,25.793
V
0,-3.90100479125977
V
-1,0
BOT
0,25.7996666666667
V
0,-3.91530990600586
V
-1,0
BOT
0,25.8063333333333
V
0,-3.92913818359375
V
-1,0
BOT
0,25.813
V
0,-3.94010543823242
V
-1,0
BOT
0,25.8196666666667
V
0,-3.9515495300293
V
-1,0
BOT
0,25.8263333333333
V
0,-3.96728515625
V
-1,0
BOT
0,25.833
V
0,-3.98588180541992
V
-1,0
BOT
0,25.8396666666667
V
0,-4.00543212890625
V
-1,0
BOT
0,25.8463333333333
V
0,-4.02545928955078
V
-1,0
BOT
0,25.853
V
0,-4.04644012451172
V
-1,0
BOT
0,25.8596666666667
V
0,-4.06503677368164
V
-1,0
BOT
0,25.8663333333333
V
0,-4.07838821411133
V
-1,0
BOT
0,25.873
V
0,-4.08744812011719
V
-1,0
BOT
0,25.8796666666667
V
0,-4.09412384033203
V
-1,0
BOT
0,25.8863333333333
V
0,-4.10127639770508
V
-1,0
BOT
0,25.893
V
0,-4.10890579223633
V
-1,0
BOT
0,25.8996666666667
V
0,-4.11748886108398
V
-1,0
BOT
0,25.9063333333333
V
0,-4.12750244140625
V
-1,0
BOT
0,25.913
V
0,-4.13846969604492
V
-1,0
BOT
0,25.9196666666667
V
0,-4.14848327636719
V
-1,0
BOT
0,25.9263333333333
V
0,-4.15802001953125
V
-1,0
BOT
0,25.933
V
0,-4.16326522827148
V
-1,0
BOT
0,25.9396666666667
V
0,-4.1656494140625
V
-1,0
BOT
0,25.9463333333333
V
0,-4.16469573974609
V
-1,0
BOT
0,25.953
V
0,-4.16374206542969
V
-1,0
BOT
0,25.9596666666667
V
0,-4.16326522827148
V
-1,0
BOT
0,25.9663333333333
V
0,-4.16088104248047
V
-1,0
BOT
0,25.973
V
0,-4.15849685668945
V
-1,0
BOT
0,25.9796666666667
V
0,-4.15468215942383
V
-1,0
BOT
0,25.9863333333333
V
0,-4.150390625
V
-1,0
BOT
0,25.993
V
0,-4.14323806762695
V
-1,0
BOT
0,25.9996666666667
V
0,-4.13417816162109
V
-1,0
BOT
0,26.0063333333333
V
0,-4.12464141845703
V
-1,0
BOT
0,26.013
V
0,-4.11605834960938
V
-1,0
BOT
0,26.0196666666667
V
0,-4.10747528076172
V
-1,0
BOT
0,26.0263333333333
V
0,-4.09936904907227
V
-1,0
BOT
0,26.033
V
0,-4.09221649169922
V
-1,0
BOT
0,26.0396666666667
V
0,-4.08363342285156
V
-1,0
BOT
0,26.0463333333333
V
0,-4.07266616821289
V
-1,0
BOT
0,26.053
V
0,-4.05788421630859
V
-1,0
BOT
0,26.0596666666667
V
0,-4.04024124145508
V
-1,0
BOT
0,26.0663333333333
V
0,-4.02069091796875
V
-1,0
BOT
0,26.073
V
0,-3.99971008300781
V
-1,0
BOT
0,26.0796666666667
V
0,-3.97777557373047
V
-1,0
BOT
0,26.0863333333333
V
0,-3.95584106445312
V
-1,0
BOT
0,26.093
V
0,-3.93581390380859
V
-1,0
BOT
0,26.0996666666667
V
0,-3.91817092895508
V
-1,0
BOT
0,26.1063333333333
V
0,-3.90052795410156
V
-1,0
BOT
0,26.113
V
0,-3.88336181640625
V
-1,0
BOT
0,26.1196666666667
V
0,-3.86857986450195
V
-1,0
BOT
0,26.1263333333333
V
0,-3.85522842407227
V
-1,0
BOT
0,26.133
V
0,-3.84140014648437
V
-1,0
BOT
0,26.1396666666667
V
0,-3.82423400878906
V
-1,0
BOT
0,26.1463333333333
V
0,-3.80611419677734
V
-1,0
BOT
0,26.153
V
0,-3.78847122192383
V
-1,0
BOT
0,26.1596666666667
V
0,-3.77035140991211
V
-1,0
BOT
0,26.1663333333333
V
0,-3.74889373779297
V
-1,0
BOT
0,26.173
V
0,-3.72552871704102
V
-1,0
BOT
0,26.1796666666667
V
0,-3.70407104492187
V
-1,0
BOT
0,26.1863333333333
V
0,-3.68595123291016
V
-1,0
BOT
0,26.193
V
0,-3.66926193237305
V
-1,0
BOT
0,26.1996666666667
V
0,-3.65400314331055
V
-1,0
BOT
0,26.2063333333333
V
0,-3.64065170288086
V
-1,0
BOT
0,26.213
V
0,-3.62968444824219
V
-1,0
BOT
0,26.2196666666667
V
0,-3.61728668212891
V
-1,0
BOT
0,26.2263333333333
V
0,-3.6015510559082
V
-1,0
BOT
0,26.233
V
0,-3.5858154296875
V
-1,0
BOT
0,26.2396666666667
V
0,-3.57151031494141
V
-1,0
BOT
0,26.2463333333333
V
0,-3.55815887451172
V
-1,0
BOT
0,26.253
V
0,-3.54719161987305
V
-1,0
BOT
0,26.2596666666667
V
0,-3.53860855102539
V
-1,0
BOT
0,26.2663333333333
V
0,-3.53384017944336
V
-1,0
BOT
0,26.273
V
0,-3.53002548217773
V
-1,0
BOT
0,26.2796666666667
V
0,-3.52716445922852
V
-1,0
BOT
0,26.2863333333333
V
0,-3.52668762207031
V
-1,0
BOT
0,26.293
V
0,-3.52764129638672
V
-1,0
BOT
0,26.2996666666667
V
0,-3.53002548217773
V
-1,0
BOT
0,26.3063333333333
V
0,-3.53288650512695
V
-1,0
BOT
0,26.313
V
0,-3.53670120239258
V
-1,0
BOT
0,26.3196666666667
V
0,-3.53908538818359
V
-1,0
BOT
0,26.3263333333333
V
0,-3.54099273681641
V
-1,0
BOT
0,26.333
V
0,-3.54146957397461
V
-1,0
BOT
0,26.3396666666667
V
0,-3.54337692260742
V
-1,0
BOT
0,26.3463333333333
V
0,-3.54719161987305
V
-1,0
BOT
0,26.353
V
0,-3.55243682861328
V
-1,0
BOT
0,26.3596666666667
V
0,-3.56101989746094
V
-1,0
BOT
0,26.3663333333333
V
0,-3.57198715209961
V
-1,0
BOT
0,26.373
V
0,-3.5862922668457
V
-1,0
BOT
0,26.3796666666667
V
0,-3.60202789306641
V
-1,0
BOT
0,26.3863333333333
V
0,-3.61919403076172
V
-1,0
BOT
0,26.393
V
0,-3.63826751708984
V
-1,0
BOT
0,26.3996666666667
V
0,-3.65781784057617
V
-1,0
BOT
0,26.4063333333333
V
0,-3.6778450012207
V
-1,0
BOT
0,26.413
V
0,-3.69644165039062
V
-1,0
BOT
0,26.4196666666667
V
0,-3.71360778808594
V
-1,0
BOT
0,26.4263333333333
V
0,-3.73077392578125
V
-1,0
BOT
0,26.433
V
0,-3.74841690063477
V
-1,0
BOT
0,26.4396666666667
V
0,-3.76558303833008
V
-1,0
BOT
0,26.4463333333333
V
0,-3.78179550170898
V
-1,0
BOT
0,26.453
V
0,-3.79705429077148
V
-1,0
BOT
0,26.4596666666667
V
0,-3.81326675415039
V
-1,0
BOT
0,26.4663333333333
V
0,-3.83090972900391
V
-1,0
BOT
0,26.473
V
0,-3.84426116943359
V
-1,0
BOT
0,26.4796666666667
V
0,-3.85284423828125
V
-1,0
BOT
0,26.4863333333333
V
0,-3.85904312133789
V
-1,0
BOT
0,26.493
V
0,-3.86571884155273
V
-1,0
BOT
0,26.4996666666667
V
0,-3.87191772460937
V
-1,0
BOT
0,26.5063333333333
V
0,-3.8762092590332
V
-1,0
BOT
0,26.513
V
0,-3.88193130493164
V
-1,0
BOT
0,26.5196666666667
V
0,-3.89003753662109
V
-1,0
BOT
0,26.5263333333333
V
0,-3.89909744262695
V
-1,0
BOT
0,26.533
V
0,-3.90720367431641
V
-1,0
BOT
0,26.5396666666667
V
0,-3.91387939453125
V
-1,0
BOT
0,26.5463333333333
V
0,-3.91960144042969
V
-1,0
BOT
0,26.553
V
0,-3.92484664916992
V
-1,0
BOT
0,26.5596666666667
V
0,-3.93056869506836
V
-1,0
BOT
0,26.5663333333333
V
0,-3.936767578125
V
-1,0
BOT
0,26.573
V
0,-3.94201278686523
V
-1,0
BOT
0,26.5796666666667
V
0,-3.94487380981445
V
-1,0
BOT
0,26.5863333333333
V
0,-3.94773483276367
V
-1,0
BOT
0,26.593
V
0,-3.9525032043457
V
-1,0
BOT
0,26.5996666666667
V
0,-3.95917892456055
V
-1,0
BOT
0,26.6063333333333
V
0,-3.96728515625
V
-1,0
BOT
0,26.613
V
0,-3.97777557373047
V
-1,0
BOT
0,26.6196666666667
V
0,-3.99160385131836
V
-1,0
BOT
0,26.6263333333333
V
0,-4.00733947753906
V
-1,0
BOT
0,26.633
V
0,-4.02116775512695
V
-1,0
BOT
0,26.6396666666667
V
0,-4.03404235839844
V
-1,0
BOT
0,26.6463333333333
V
0,-4.0440559387207
V
-1,0
BOT
0,26.653
V
0,-4.05406951904297
V
-1,0
BOT
0,26.6596666666667
V
0,-4.06265258789063
V
-1,0
BOT
0,26.6663333333333
V
0,-4.07266616821289
V
-1,0
BOT
0,26.673
V
0,-4.08458709716797
V
-1,0
BOT
0,26.6796666666667
V
0,-4.09603118896484
V
-1,0
BOT
0,26.6863333333333
V
0,-4.10652160644531
V
-1,0
BOT
0,26.693
V
0,-4.11653518676758
V
-1,0
BOT
0,26.6996666666667
V
0,-4.12702560424805
V
-1,0
BOT
0,26.7063333333333
V
0,-4.13417816162109
V
-1,0
BOT
0,26.713
V
0,-4.13846969604492
V
-1,0
BOT
0,26.7196666666667
V
0,-4.14180755615234
V
-1,0
BOT
0,26.7263333333333
V
0,-4.14514541625977
V
-1,0
BOT
0,26.733
V
0,-4.14800643920898
V
-1,0
BOT
0,26.7396666666667
V
0,-4.1508674621582
V
-1,0
BOT
0,26.7463333333333
V
0,-4.15372848510742
V
-1,0
BOT
0,26.753
V
0,-4.15611267089844
V
-1,0
BOT
0,26.7596666666667
V
0,-4.15706634521484
V
-1,0
BOT
0,26.7663333333333
V
0,-4.15754318237305
V
-1,0
BOT
0,26.773
V
0,-4.15754318237305
V
-1,0
BOT
0,26.7796666666667
V
0,-4.15515899658203
V
-1,0
BOT
0,26.7863333333333
V
0,-4.14848327636719
V
-1,0
BOT
0,26.793
V
0,-4.14133071899414
V
-1,0
BOT
0,26.7996666666667
V
0,-4.1351318359375
V
-1,0
BOT
0,26.8063333333333
V
0,-4.12893295288086
V
-1,0
BOT
0,26.813
V
0,-4.1193962097168
V
-1,0
BOT
0,26.8196666666667
V
0,-4.10747528076172
V
-1,0
BOT
0,26.8263333333333
V
0,-4.09698486328125
V
-1,0
BOT
0,26.833
V
0,-4.08601760864258
V
-1,0
BOT
0,26.8396666666667
V
0,-4.0745735168457
V
-1,0
BOT
0,26.8463333333333
V
0,-4.06503677368164
V
-1,0
BOT
0,26.853
V
0,-4.05788421630859
V
-1,0
BOT
0,26.8596666666667
V
0,-4.05168533325195
V
-1,0
BOT
0,26.8663333333333
V
0,-4.04214859008789
V
-1,0
BOT
0,26.873
V
0,-4.03022766113281
V
-1,0
BOT
0,26.8796666666667
V
0,-4.01639938354492
V
-1,0
BOT
0,26.8863333333333
V
0,-4.00066375732422
V
-1,0
BOT
0,26.893
V
0,-3.98445129394531
V
-1,0
BOT
0,26.8996666666667
V
0,-3.96633148193359
V
-1,0
BOT
0,26.9063333333333
V
0,-3.95059585571289
V
-1,0
BOT
0,26.913
V
0,-3.9362907409668
V
-1,0
BOT
0,26.9196666666667
V
0,-3.92246246337891
V
-1,0
BOT
0,26.9263333333333
V
0,-3.9067268371582
V
-1,0
BOT
0,26.933
V
0,-3.8905143737793
V
-1,0
BOT
0,26.9396666666667
V
0,-3.875732421875
V
-1,0
BOT
0,26.9463333333333
V
0,-3.86238098144531
V
-1,0
BOT
0,26.953
V
0,-3.84902954101562
V
-1,0
BOT
0,26.9596666666667
V
0,-3.83472442626953
V
-1,0
BOT
0,26.9663333333333
V
0,-3.82137298583984
V
-1,0
BOT
0,26.973
V
0,-3.80945205688477
V
-1,0
BOT
0,26.9796666666667
V
0,-3.7994384765625
V
-1,0
BOT
0,26.9863333333333
V
0,-3.79037857055664
V
-1,0
BOT
0,26.993
V
0,-3.78131866455078
V
-1,0
BOT
0,26.9996666666667
V
0,-3.77130508422852
V
-1,0
BOT
0,27.0063333333333
V
0,-3.75795364379883
V
-1,0
BOT
0,27.013
V
0,-3.74221801757812
V
-1,0
BOT
0,27.0196666666667
V
0,-3.72552871704102
V
-1,0
BOT
0,27.0263333333333
V
0,-3.7078857421875
V
-1,0
BOT
0,27.033
V
0,-3.69119644165039
V
-1,0
BOT
0,27.0396666666667
V
0,-3.6778450012207
V
-1,0
BOT
0,27.0463333333333
V
0,-3.66783142089844
V
-1,0
BOT
0,27.053
V
0,-3.65829467773437
V
-1,0
BOT
0,27.0596666666667
V
0,-3.6468505859375
V
-1,0
BOT
0,27.0663333333333
V
0,-3.63492965698242
V
-1,0
BOT
0,27.073
V
0,-3.62348556518555
V
-1,0
BOT
0,27.0796666666667
V
0,-3.61204147338867
V
-1,0
BOT
0,27.0863333333333
V
0,-3.6005973815918
V
-1,0
BOT
0,27.093
V
0,-3.58915328979492
V
-1,0
BOT
0,27.0996666666667
V
0,-3.57770919799805
V
-1,0
BOT
0,27.1063333333333
V
0,-3.56626510620117
V
-1,0
BOT
0,27.113
V
0,-3.5552978515625
V
-1,0
BOT
0,27.1196666666667
V
0,-3.54480743408203
V
-1,0
BOT
0,27.1263333333333
V
0,-3.53384017944336
V
-1,0
BOT
0,27.133
V
0,-3.52287292480469
V
-1,0
BOT
0,27.1396666666667
V
0,-3.51095199584961
V
-1,0
BOT
0,27.1463333333333
V
0,-3.49760055541992
V
-1,0
BOT
0,27.153
V
0,-3.48281860351562
V
-1,0
BOT
0,27.1596666666667
V
0,-3.46803665161133
V
-1,0
BOT
0,27.1663333333333
V
0,-3.45563888549805
V
-1,0
BOT
0,27.173
V
0,-3.44371795654297
V
-1,0
BOT
0,27.1796666666667
V
0,-3.43227386474609
V
-1,0
BOT
0,27.1863333333333
V
0,-3.42130661010742
V
-1,0
BOT
0,27.193
V
0,-3.41033935546875
V
-1,0
BOT
0,27.1996666666667
V
0,-3.39794158935547
V
-1,0
BOT
0,27.2063333333333
V
0,-3.3869743347168
V
-1,0
BOT
0,27.213
V
0,-3.37934494018555
V
-1,0
BOT
0,27.2196666666667
V
0,-3.37457656860352
V
-1,0
BOT
0,27.2263333333333
V
0,-3.37123870849609
V
-1,0
BOT
0,27.233
V
0,-3.36837768554687
V
-1,0
BOT
0,27.2396666666667
V
0,-3.36837768554687
V
-1,0
BOT
0,27.2463333333333
V
0,-3.36694717407227
V
-1,0
BOT
0,27.253
V
0,-3.36313247680664
V
-1,0
BOT
0,27.2596666666667
V
0,-3.36074829101562
V
-1,0
BOT
0,27.2663333333333
V
0,-3.36074829101562
V
-1,0
BOT
0,27.273
V
0,-3.36265563964844
V
-1,0
BOT
0,27.2796666666667
V
0,-3.36360931396484
V
-1,0
BOT
0,27.2863333333333
V
0,-3.36790084838867
V
-1,0
BOT
0,27.293
V
0,-3.37696075439453
V
-1,0
BOT
0,27.2996666666667
V
0,-3.3869743347168
V
-1,0
BOT
0,27.3063333333333
V
0,-3.39651107788086
V
-1,0
BOT
0,27.313
V
0,-3.40652465820312
V
-1,0
BOT
0,27.3196666666667
V
0,-3.41653823852539
V
-1,0
BOT
0,27.3263333333333
V
0,-3.42512130737305
V
-1,0
BOT
0,27.333
V
0,-3.43132019042969
V
-1,0
BOT
0,27.3396666666667
V
0,-3.43847274780273
V
-1,0
BOT
0,27.3463333333333
V
0,-3.4489631652832
V
-1,0
BOT
0,27.353
V
0,-3.45993041992187
V
-1,0
BOT
0,27.3596666666667
V
0,-3.47185134887695
V
-1,0
BOT
0,27.3663333333333
V
0,-3.48472595214844
V
-1,0
BOT
0,27.373
V
0,-3.49855422973633
V
-1,0
BOT
0,27.3796666666667
V
0,-3.51142883300781
V
-1,0
BOT
0,27.3863333333333
V
0,-3.52334976196289
V
-1,0
BOT
0,27.393
V
0,-3.53670120239258
V
-1,0
BOT
0,27.3996666666667
V
0,-3.54957580566406
V
-1,0
BOT
0,27.4063333333333
V
0,-3.56245040893555
V
-1,0
BOT
0,27.413
V
0,-3.57532501220703
V
-1,0
BOT
0,27.4196666666667
V
0,-3.58772277832031
V
-1,0
BOT
0,27.4263333333333
V
0,-3.59916687011719
V
-1,0
BOT
0,27.433
V
0,-3.61061096191406
V
-1,0
BOT
0,27.4396666666667
V
0,-3.62253189086914
V
-1,0
BOT
0,27.4463333333333
V
0,-3.63397598266602
V
-1,0
BOT
0,27.453
V
0,-3.64351272583008
V
-1,0
BOT
0,27.4596666666667
V
0,-3.65257263183594
V
-1,0
BOT
0,27.4663333333333
V
0,-3.66449356079102
V
-1,0
BOT
0,27.473
V
0,-3.6778450012207
V
-1,0
BOT
0,27.4796666666667
V
0,-3.69071960449219
V
-1,0
BOT
0,27.4863333333333
V
0,-3.70264053344727
V
-1,0
BOT
0,27.493
V
0,-3.71313095092773
V
-1,0
BOT
0,27.4996666666667
V
0,-3.72123718261719
V
-1,0
BOT
0,27.5063333333333
V
0,-3.72648239135742
V
-1,0
BOT
0,27.513
V
0,-3.72982025146484
V
-1,0
BOT
0,27.5196666666667
V
0,-3.73458862304687
V
-1,0
BOT
0,27.5263333333333
V
0,-3.73935699462891
V
-1,0
BOT
0,27.533
V
0,-3.74555587768555
V
-1,0
BOT
0,27.5396666666667
V
0,-3.75175476074219
V
-1,0
BOT
0,27.5463333333333
V
0,-3.75795364379883
V
-1,0
BOT
0,27.553
V
0,-3.76319885253906
V
-1,0
BOT
0,27.5596666666667
V
0,-3.76510620117187
V
-1,0
BOT
0,27.5663333333333
V
0,-3.76558303833008
V
-1,0
BOT
0,27.573
V
0,-3.76558303833008
V
-1,0
BOT
0,27.5796666666667
V
0,-3.76510620117187
V
-1,0
BOT
0,27.5863333333333
V
0,-3.76462936401367
V
-1,0
BOT
0,27.593
V
0,-3.76415252685547
V
-1,0
BOT
0,27.5996666666667
V
0,-3.76415252685547
V
-1,0
BOT
0,27.6063333333333
V
0,-3.76319885253906
V
-1,0
BOT
0,27.613
V
0,-3.76033782958984
V
-1,0
BOT
0,27.6196666666667
V
0,-3.75652313232422
V
-1,0
BOT
0,27.6263333333333
V
0,-3.75127792358398
V
-1,0
BOT
0,27.633
V
0,-3.74364852905273
V
-1,0
BOT
0,27.6396666666667
V
0,-3.73268127441406
V
-1,0
BOT
0,27.6463333333333
V
0,-3.71837615966797
V
-1,0
BOT
0,27.653
V
0,-3.70359420776367
V
-1,0
BOT
0,27.6596666666667
V
0,-3.68690490722656
V
-1,0
BOT
0,27.6663333333333
V
0,-3.66926193237305
V
-1,0
BOT
0,27.673
V
0,-3.64923477172852
V
-1,0
BOT
0,27.6796666666667
V
0,-3.62682342529297
V
-1,0
BOT
0,27.6863333333333
V
0,-3.60393524169922
V
-1,0
BOT
0,27.693
V
0,-3.58295440673828
V
-1,0
BOT
0,27.6996666666667
V
0,-3.56292724609375
V
-1,0
BOT
0,27.7063333333333
V
0,-3.54099273681641
V
-1,0
BOT
0,27.713
V
0,-3.51715087890625
V
-1,0
BOT
0,27.7196666666667
V
0,-3.49283218383789
V
-1,0
BOT
0,27.7263333333333
V
0,-3.46612930297852
V
-1,0
BOT
0,27.733
V
0,-3.43465805053711
V
-1,0
BOT
0,27.7396666666667
V
0,-3.39889526367187
V
-1,0
BOT
0,27.7463333333333
V
0,-3.36217880249023
V
-1,0
BOT
0,27.753
V
0,-3.32498550415039
V
-1,0
BOT
0,27.7596666666667
V
0,-3.28397750854492
V
-1,0
BOT
0,27.7663333333333
V
0,-3.24201583862305
V
-1,0
BOT
0,27.773
V
0,-3.19957733154297
V
-1,0
BOT
0,27.7796666666667
V
0,-3.1585693359375
V
-1,0
BOT
0,27.7863333333333
V
0,-3.1132698059082
V
-1,0
BOT
0,27.793
V
0,-3.06367874145508
V
-1,0
BOT
0,27.7996666666667
V
0,-3.01218032836914
V
-1,0
BOT
0,27.8063333333333
V
0,-2.96115875244141
V
-1,0
BOT
0,27.813
V
0,-2.91013717651367
V
-1,0
BOT
0,27.8196666666667
V
0,-2.85577774047852
V
-1,0
BOT
0,27.8263333333333
V
0,-2.80141830444336
V
-1,0
BOT
0,27.833
V
0,-2.74753570556641
V
-1,0
BOT
0,27.8396666666667
V
0,-2.69651412963867
V
-1,0
BOT
0,27.8463333333333
V
0,-2.64453887939453
V
-1,0
BOT
0,27.853
V
0,-2.59256362915039
V
-1,0
BOT
0,27.8596666666667
V
0,-2.54297256469727
V
-1,0
BOT
0,27.8663333333333
V
0,-2.49338150024414
V
-1,0
BOT
0,27.873
V
0,-2.44379043579102
V
-1,0
BOT
0,27.8796666666667
V
0,-2.39229202270508
V
-1,0
BOT
0,27.8863333333333
V
0,-2.34127044677734
V
-1,0
BOT
0,27.893
V
0,-2.29310989379883
V
-1,0
BOT
0,27.8996666666667
V
0,-2.24971771240234
V
-1,0
BOT
0,27.9063333333333
V
0,-2.20918655395508
V
-1,0
BOT
0,27.913
V
0,-2.17199325561523
V
-1,0
BOT
0,27.9196666666667
V
0,-2.13956832885742
V
-1,0
BOT
0,27.9263333333333
V
0,-2.11143493652344
V
-1,0
BOT
0,27.933
V
0,-2.08616256713867
V
-1,0
BOT
0,27.9396666666667
V
0,-2.06184387207031
V
-1,0
BOT
0,27.9463333333333
V
0,-2.03943252563477
V
-1,0
BOT
0,27.953
V
0,-2.02178955078125
V
-1,0
BOT
0,27.9596666666667
V
0,-2.00700759887695
V
-1,0
BOT
0,27.9663333333333
V
0,-1.99413299560547
V
-1,0
BOT
0,27.973
V
0,-1.98173522949219
V
-1,0
BOT
0,27.9796666666667
V
0,-1.97315216064453
V
-1,0
BOT
0,27.9863333333333
V
0,-1.97076797485352
V
-1,0
BOT
0,27.993
V
0,-1.97267532348633
V
-1,0
BOT
0,27.9996666666667
V
0,-1.97649002075195
V
-1,0
BOT
0,28.0063333333333
V
0,-1.98125839233398
V
-1,0
BOT
0,28.013
V
0,-1.99127197265625
V
-1,0
BOT
0,28.0196666666667
V
0,-2.00414657592773
V
-1,0
BOT
0,28.0263333333333
V
0,-2.01654434204102
V
-1,0
BOT
0,28.033
V
0,-2.0289421081543
V
-1,0
BOT
0,28.0396666666667
V
0,-2.0451545715332
V
-1,0
BOT
0,28.0463333333333
V
0,-2.06661224365234
V
-1,0
BOT
0,28.053
V
0,-2.09188461303711
V
-1,0
BOT
0,28.0596666666667
V
0,-2.11858749389648
V
-1,0
BOT
0,28.0663333333333
V
0,-2.14815139770508
V
-1,0
BOT
0,28.073
V
0,-2.18057632446289
V
-1,0
BOT
0,28.0796666666667
V
0,-2.21395492553711
V
-1,0
BOT
0,28.0863333333333
V
0,-2.24494934082031
V
-1,0
BOT
0,28.093
V
0,-2.27069854736328
V
-1,0
BOT
0,28.0996666666667
V
0,-2.29454040527344
V
-1,0
BOT
0,28.1063333333333
V
0,-2.3198127746582
V
-1,0
BOT
0,28.113
V
0,-2.34889984130859
V
-1,0
BOT
0,28.1196666666667
V
0,-2.38037109375
V
-1,0
BOT
0,28.1263333333333
V
0,-2.41565704345703
V
-1,0
BOT
0,28.133
V
0,-2.45380401611328
V
-1,0
BOT
0,28.1396666666667
V
0,-2.49242782592773
V
-1,0
BOT
0,28.1463333333333
V
0,-2.52819061279297
V
-1,0
BOT
0,28.153
V
0,-2.55966186523437
V
-1,0
BOT
0,28.1596666666667
V
0,-2.58827209472656
V
-1,0
BOT
0,28.1663333333333
V
0,-2.61640548706055
V
-1,0
BOT
0,28.173
V
0,-2.64739990234375
V
-1,0
BOT
0,28.1796666666667
V
0,-2.68077850341797
V
-1,0
BOT
0,28.1863333333333
V
0,-2.71511077880859
V
-1,0
BOT
0,28.193
V
0,-2.74991989135742
V
-1,0
BOT
0,28.1996666666667
V
0,-2.78615951538086
V
-1,0
BOT
0,28.2063333333333
V
0,-2.82430648803711
V
-1,0
BOT
0,28.213
V
0,-2.86245346069336
V
-1,0
BOT
0,28.2196666666667
V
0,-2.8996467590332
V
-1,0
BOT
0,28.2263333333333
V
0,-2.93636322021484
V
-1,0
BOT
0,28.233
V
0,-2.97164916992187
V
-1,0
BOT
0,28.2396666666667
V
0,-3.0055046081543
V
-1,0
BOT
0,28.2463333333333
V
0,-3.03506851196289
V
-1,0
BOT
0,28.253
V
0,-3.06081771850586
V
-1,0
BOT
0,28.2596666666667
V
0,-3.08465957641602
V
-1,0
BOT
0,28.2663333333333
V
0,-3.10850143432617
V
-1,0
BOT
0,28.273
V
0,-3.13377380371094
V
-1,0
BOT
0,28.2796666666667
V
0,-3.15999984741211
V
-1,0
BOT
0,28.2863333333333
V
0,-3.18717956542969
V
-1,0
BOT
0,28.293
V
0,-3.21340560913086
V
-1,0
BOT
0,28.2996666666667
V
0,-3.24010848999023
V
-1,0
BOT
0,28.3063333333333
V
0,-3.26681137084961
V
-1,0
BOT
0,28.313
V
0,-3.29303741455078
V
-1,0
BOT
0,28.3196666666667
V
0,-3.31735610961914
V
-1,0
BOT
0,28.3263333333333
V
0,-3.33929061889648
V
-1,0
BOT
0,28.333
V
0,-3.35884094238281
V
-1,0
BOT
0,28.3396666666667
V
0,-3.37553024291992
V
-1,0
BOT
0,28.3463333333333
V
0,-3.39221954345703
V
-1,0
BOT
0,28.353
V
0,-3.40938568115234
V
-1,0
BOT
0,28.3596666666667
V
0,-3.42893600463867
V
-1,0
BOT
0,28.3663333333333
V
0,-3.45039367675781
V
-1,0
BOT
0,28.373
V
0,-3.47471237182617
V
-1,0
BOT
0,28.3796666666667
V
0,-3.49950790405273
V
-1,0
BOT
0,28.3863333333333
V
0,-3.52144241333008
V
-1,0
BOT
0,28.393
V
0,-3.5400390625
V
-1,0
BOT
0,28.3996666666667
V
0,-3.55720520019531
V
-1,0
BOT
0,28.4063333333333
V
0,-3.57341766357422
V
-1,0
BOT
0,28.413
V
0,-3.58819961547852
V
-1,0
BOT
0,28.4196666666667
V
0,-3.60488891601562
V
-1,0
BOT
0,28.4263333333333
V
0,-3.62300872802734
V
-1,0
BOT
0,28.433
V
0,-3.64255905151367
V
-1,0
BOT
0,28.4396666666667
V
0,-3.65829467773437
V
-1,0
BOT
0,28.4463333333333
V
0,-3.67164611816406
V
-1,0
BOT
0,28.453
V
0,-3.68261337280273
V
-1,0
BOT
0,28.4596666666667
V
0,-3.6931037902832
V
-1,0
BOT
0,28.4663333333333
V
0,-3.70121002197266
V
-1,0
BOT
0,28.473
V
0,-3.70550155639648
V
-1,0
BOT
0,28.4796666666667
V
0,-3.70883941650391
V
-1,0
BOT
0,28.4863333333333
V
0,-3.71217727661133
V
-1,0
BOT
0,28.493
V
0,-3.71646881103516
V
-1,0
BOT
0,28.4996666666667
V
0,-3.71694564819336
V
-1,0
BOT
0,28.5063333333333
V
0,-3.71360778808594
V
-1,0
BOT
0,28.513
V
0,-3.71026992797852
V
-1,0
BOT
0,28.5196666666667
V
0,-3.7078857421875
V
-1,0
BOT
0,28.5263333333333
V
0,-3.70454788208008
V
-1,0
BOT
0,28.533
V
0,-3.69739532470703
V
-1,0
BOT
0,28.5396666666667
V
0,-3.68642807006836
V
-1,0
BOT
0,28.5463333333333
V
0,-3.67450714111328
V
-1,0
BOT
0,28.553
V
0,-3.65924835205078
V
-1,0
BOT
0,28.5596666666667
V
0,-3.63636016845703
V
-1,0
BOT
0,28.5663333333333
V
0,-3.60727310180664
V
-1,0
BOT
0,28.573
V
0,-3.57770919799805
V
-1,0
BOT
0,28.5796666666667
V
0,-3.54909896850586
V
-1,0
BOT
0,28.5863333333333
V
0,-3.51715087890625
V
-1,0
BOT
0,28.593
V
0,-3.48234176635742
V
-1,0
BOT
0,28.5996666666667
V
0,-3.44419479370117
V
-1,0
BOT
0,28.6063333333333
V
0,-3.40461730957031
V
-1,0
BOT
0,28.613
V
0,-3.36074829101562
V
-1,0
BOT
0,28.6196666666667
V
0,-3.31258773803711
V
-1,0
BOT
0,28.6263333333333
V
0,-3.26061248779297
V
-1,0
BOT
0,28.633
V
0,-3.2038688659668
V
-1,0
BOT
0,28.6396666666667
V
0,-3.14188003540039
V
-1,0
BOT
0,28.6463333333333
V
0,-3.07512283325195
V
-1,0
BOT
0,28.653
V
0,-3.0064582824707
V
-1,0
BOT
0,28.6596666666667
V
0,-2.93636322021484
V
-1,0
BOT
0,28.6663333333333
V
0,-2.86436080932617
V
-1,0
BOT
0,28.673
V
0,-2.79092788696289
V
-1,0
BOT
0,28.6796666666667
V
0,-2.71892547607422
V
-1,0
BOT
0,28.6863333333333
V
0,-2.64739990234375
V
-1,0
BOT
0,28.693
V
0,-2.57301330566406
V
-1,0
BOT
0,28.6996666666667
V
0,-2.49290466308594
V
-1,0
BOT
0,28.7063333333333
V
0,-2.40993499755859
V
-1,0
BOT
0,28.713
V
0,-2.32505798339844
V
-1,0
BOT
0,28.7196666666667
V
0,-2.23827362060547
V
-1,0
BOT
0,28.7263333333333
V
0,-2.14910507202148
V
-1,0
BOT
0,28.733
V
0,-2.0604133605957
V
-1,0
BOT
0,28.7396666666667
V
0,-1.97219848632812
V
-1,0
BOT
0,28.7463333333333
V
0,-1.88684463500977
V
-1,0
BOT
0,28.753
V
0,-1.80435180664062
V
-1,0
BOT
0,28.7596666666667
V
0,-1.7242431640625
V
-1,0
BOT
0,28.7663333333333
V
0,-1.64508819580078
V
-1,0
BOT
0,28.773
V
0,-1.56641006469727
V
-1,0
BOT
0,28.7796666666667
V
0,-1.49059295654297
V
-1,0
BOT
0,28.7863333333333
V
0,-1.41716003417969
V
-1,0
BOT
0,28.793
V
0,-1.34658813476562
V
-1,0
BOT
0,28.7996666666667
V
0,-1.27887725830078
V
-1,0
BOT
0,28.8063333333333
V
0,-1.21355056762695
V
-1,0
BOT
0,28.813
V
0,-1.15060806274414
V
-1,0
BOT
0,28.8196666666667
V
0,-1.09004974365234
V
-1,0
BOT
0,28.8263333333333
V
0,-1.03235244750977
V
-1,0
BOT
0,28.833
V
0,-0.978946685791016
V
-1,0
BOT
0,28.8396666666667
V
0,-0.931262969970703
V
-1,0
BOT
0,28.8463333333333
V
0,-0.890254974365234
V
-1,0
BOT
0,28.853
V
0,-0.856399536132813
V
-1,0
BOT
0,28.8596666666667
V
0,-0.828742980957031
V
-1,0
BOT
0,28.8663333333333
V
0,-0.806331634521484
V
-1,0
BOT
0,28.873
V
0,-0.789165496826172
V
-1,0
BOT
0,28.8796666666667
V
0,-0.776767730712891
V
-1,0
BOT
0,28.8863333333333
V
0,-0.769615173339844
V
-1,0
BOT
0,28.893
V
0,-0.767707824707031
V
-1,0
BOT
0,28.8996666666667
V
0,-0.770092010498047
V
-1,0
BOT
0,28.9063333333333
V
0,-0.777721405029297
V
-1,0
BOT
0,28.913
V
0,-0.789642333984375
V
-1,0
BOT
0,28.9196666666667
V
0,-0.806808471679688
V
-1,0
BOT
0,28.9263333333333
V
0,-0.828266143798828
V
-1,0
BOT
0,28.933
V
0,-0.852584838867188
V
-1,0
BOT
0,28.9396666666667
V
0,-0.881195068359375
V
-1,0
BOT
0,28.9463333333333
V
0,-0.911235809326172
V
-1,0
BOT
0,28.953
V
0,-0.943183898925781
V
-1,0
BOT
0,28.9596666666667
V
0,-0.976085662841797
V
-1,0
BOT
0,28.9663333333333
V
0,-1.01137161254883
V
-1,0
BOT
0,28.973
V
0,-1.04856491088867
V
-1,0
BOT
0,28.9796666666667
V
0,-1.08957290649414
V
-1,0
BOT
0,28.9863333333333
V
0,-1.13344192504883
V
-1,0
BOT
0,28.993
V
0,-1.18017196655273
V
-1,0
BOT
0,28.9996666666667
V
0,-1.23071670532227
V
-1,0
BOT
0,29.0063333333333
V
0,-1.28507614135742
V
-1,0
BOT
0,29.013
V
0,-1.34134292602539
V
-1,0
BOT
0,29.0196666666667
V
0,-1.39760971069336
V
-1,0
BOT
0,29.0263333333333
V
0,-1.45626068115234
V
-1,0
BOT
0,29.033
V
0,-1.51920318603516
V
-1,0
BOT
0,29.0396666666667
V
0,-1.58357620239258
V
-1,0
BOT
0,29.0463333333333
V
0,-1.6474723815918
V
-1,0
BOT
0,29.053
V
0,-1.71232223510742
V
-1,0
BOT
0,29.0596666666667
V
0,-1.78146362304687
V
-1,0
BOT
0,29.0663333333333
V
0,-1.85298919677734
V
-1,0
BOT
0,29.073
V
0,-1.9221305847168
V
-1,0
BOT
0,29.0796666666667
V
0,-1.98936462402344
V
-1,0
BOT
0,29.0863333333333
V
0,-2.05326080322266
V
-1,0
BOT
0,29.093
V
0,-2.11763381958008
V
-1,0
BOT
0,29.0996666666667
V
0,-2.18009948730469
V
-1,0
BOT
0,29.1063333333333
V
0,-2.24018096923828
V
-1,0
BOT
0,29.113
V
0,-2.30026245117187
V
-1,0
BOT
0,29.1196666666667
V
0,-2.36225128173828
V
-1,0
BOT
0,29.1263333333333
V
0,-2.4266242980957
V
-1,0
BOT
0,29.133
V
0,-2.48908996582031
V
-1,0
BOT
0,29.1396666666667
V
0,-2.5482177734375
V
-1,0
BOT
0,29.1463333333333
V
0,-2.60448455810547
V
-1,0
BOT
0,29.153
V
0,-2.65789031982422
V
-1,0
BOT
0,29.1596666666667
V
0,-2.70938873291016
V
-1,0
BOT
0,29.1663333333333
V
0,-2.75850296020508
V
-1,0
BOT
0,29.173
V
0,-2.8076171875
V
-1,0
BOT
0,29.1796666666667
V
0,-2.85816192626953
V
-1,0
BOT
0,29.1863333333333
V
0,-2.90966033935547
V
-1,0
BOT
0,29.193
V
0,-2.96306610107422
V
-1,0
BOT
0,29.1996666666667
V
0,-3.01313400268555
V
-1,0
BOT
0,29.2063333333333
V
0,-3.06367874145508
V
-1,0
BOT
0,29.213
V
0,-3.1123161315918
V
-1,0
BOT
0,29.2196666666667
V
0,-3.15999984741211
V
-1,0
BOT
0,29.2263333333333
V
0,-3.20577621459961
V
-1,0
BOT
0,29.233
V
0,-3.2496452331543
V
-1,0
BOT
0,29.2396666666667
V
0,-3.29303741455078
V
-1,0
BOT
0,29.2463333333333
V
0,-3.33356857299805
V
-1,0
BOT
0,29.253
V
0,-3.3721923828125
V
-1,0
BOT
0,29.2596666666667
V
0,-3.40843200683594
V
-1,0
BOT
0,29.2663333333333
V
0,-3.44467163085937
V
-1,0
BOT
0,29.273
V
0,-3.47995758056641
V
-1,0
BOT
0,29.2796666666667
V
0,-3.51524353027344
V
-1,0
BOT
0,29.2863333333333
V
0,-3.55148315429687
V
-1,0
BOT
0,29.293
V
0,-3.58724594116211
V
-1,0
BOT
0,29.2996666666667
V
0,-3.62110137939453
V
-1,0
BOT
0,29.3063333333333
V
0,-3.65161895751953
V
-1,0
BOT
0,29.313
V
0,-3.67832183837891
V
-1,0
BOT
0,29.3196666666667
V
0,-3.70311737060547
V
-1,0
BOT
0,29.3263333333333
V
0,-3.72838973999023
V
-1,0
BOT
0,29.333
V
0,-3.75556945800781
V
-1,0
BOT
0,29.3396666666667
V
0,-3.78513336181641
V
-1,0
BOT
0,29.3463333333333
V
0,-3.81660461425781
V
-1,0
BOT
0,29.353
V
0,-3.84807586669922
V
-1,0
BOT
0,29.3596666666667
V
0,-3.8762092590332
V
-1,0
BOT
0,29.3663333333333
V
0,-3.90148162841797
V
-1,0
BOT
0,29.373
V
0,-3.9215087890625
V
-1,0
BOT
0,29.3796666666667
V
0,-3.93819808959961
V
-1,0
BOT
0,29.3863333333333
V
0,-3.95631790161133
V
-1,0
BOT
0,29.393
V
0,-3.97920608520508
V
-1,0
BOT
0,29.3996666666667
V
0,-4.00733947753906
V
-1,0
BOT
0,29.4063333333333
V
0,-4.03642654418945
V
-1,0
BOT
0,29.413
V
0,-4.06599044799805
V
-1,0
BOT
0,29.4196666666667
V
0,-4.09698486328125
V
-1,0
BOT
0,29.4263333333333
V
0,-4.12750244140625
V
-1,0
BOT
0,29.433
V
0,-4.15563583374023
V
-1,0
BOT
0,29.4396666666667
V
0,-4.1804313659668
V
-1,0
BOT
0,29.4463333333333
V
0,-4.20331954956055
V
-1,0
BOT
0,29.453
V
0,-4.22811508178711
V
-1,0
BOT
0,29.4596666666667
V
0,-4.25291061401367
V
-1,0
BOT
0,29.4663333333333
V
0,-4.27627563476563
V
-1,0
BOT
0,29.473
V
0,-4.29773330688477
V
-1,0
BOT
0,29.4796666666667
V
0,-4.3182373046875
V
-1,0
BOT
0,29.4863333333333
V
0,-4.33778762817383
V
-1,0
BOT
0,29.493
V
0,-4.35638427734375
V
-1,0
BOT
0,29.4996666666667
V
0,-4.37641143798828
V
-1,0
BOT
0,29.5063333333333
V
0,-4.39548492431641
V
-1,0
BOT
0,29.513
V
0,-4.41265106201172
V
-1,0
BOT
0,29.5196666666667
V
0,-4.42934036254883
V
-1,0
BOT
0,29.5263333333333
V
0,-4.44841384887695
V
-1,0
BOT
0,29.533
V
0,-4.46653366088867
V
-1,0
BOT
0,29.5396666666667
V
0,-4.47988510131836
V
-1,0
BOT
0,29.5463333333333
V
0,-4.49037551879883
V
-1,0
BOT
0,29.553
V
0,-4.49991226196289
V
-1,0
BOT
0,29.5596666666667
V
0,-4.50849533081055
V
-1,0
BOT
0,29.5663333333333
V
0,-4.51469421386719
V
-1,0
BOT
0,29.573
V
0,-4.51850891113281
V
-1,0
BOT
0,29.5796666666667
V
0,-4.52136993408203
V
-1,0
BOT
0,29.5863333333333
V
0,-4.52327728271484
V
-1,0
BOT
0,29.593
V
0,-4.52327728271484
V
-1,0
BOT
0,29.5996666666667
V
0,-4.52280044555664
V
-1,0
BOT
0,29.6063333333333
V
0,-4.51946258544922
V
-1,0
BOT
0,29.613
V
0,-4.51374053955078
V
-1,0
BOT
0,29.6196666666667
V
0,-4.50563430786133
V
-1,0
BOT
0,29.6263333333333
V
0,-4.49657440185547
V
-1,0
BOT
0,29.633
V
0,-4.48751449584961
V
-1,0
BOT
0,29.6396666666667
V
0,-4.47893142700195
V
-1,0
BOT
0,29.6463333333333
V
0,-4.47320938110352
V
-1,0
BOT
0,29.653
V
0,-4.46748733520508
V
-1,0
BOT
0,29.6596666666667
V
0,-4.46224212646484
V
-1,0
BOT
0,29.6663333333333
V
0,-4.4560432434082
V
-1,0
BOT
0,29.673
V
0,-4.44793701171875
V
-1,0
BOT
0,29.6796666666667
V
0,-4.43696975708008
V
-1,0
BOT
0,29.6863333333333
V
0,-4.42171096801758
V
-1,0
BOT
0,29.693
V
0,-4.40549850463867
V
-1,0
BOT
0,29.6996666666667
V
0,-4.38928604125977
V
-1,0
BOT
0,29.7063333333333
V
0,-4.37450408935547
V
-1,0
BOT
0,29.713
V
0,-4.36162948608398
V
-1,0
BOT
0,29.7196666666667
V
0,-4.3482780456543
V
-1,0
BOT
0,29.7263333333333
V
0,-4.3339729309082
V
-1,0
BOT
0,29.733
V
0,-4.31632995605469
V
-1,0
BOT
0,29.7396666666667
V
0,-4.29821014404297
V
-1,0
BOT
0,29.7463333333333
V
0,-4.27865982055664
V
-1,0
BOT
0,29.753
V
0,-4.25958633422852
V
-1,0
BOT
0,29.7596666666667
V
0,-4.24003601074219
V
-1,0
BOT
0,29.7663333333333
V
0,-4.22191619873047
V
-1,0
BOT
0,29.773
V
0,-4.20427322387695
V
-1,0
BOT
0,29.7796666666667
V
0,-4.18615341186523
V
-1,0
BOT
0,29.7863333333333
V
0,-4.16469573974609
V
-1,0
BOT
0,29.793
V
0,-4.14228439331055
V
-1,0
BOT
0,29.7996666666667
V
0,-4.12178039550781
V
-1,0
BOT
0,29.8063333333333
V
0,-4.1046142578125
V
-1,0
BOT
0,29.813
V
0,-4.08697128295898
V
-1,0
BOT
0,29.8196666666667
V
0,-4.06885147094727
V
-1,0
BOT
0,29.8263333333333
V
0,-4.04882431030273
V
-1,0
BOT
0,29.833
V
0,-4.0287971496582
V
-1,0
BOT
0,29.8396666666667
V
0,-4.00876998901367
V
-1,0
BOT
0,29.8463333333333
V
0,-3.98874282836914
V
-1,0
BOT
0,29.853
V
0,-3.97109985351562
V
-1,0
BOT
0,29.8596666666667
V
0,-3.95584106445312
V
-1,0
BOT
0,29.8663333333333
V
0,-3.94344329833984
V
-1,0
BOT
0,29.873
V
0,-3.93104553222656
V
-1,0
BOT
0,29.8796666666667
V
0,-3.91674041748047
V
-1,0
BOT
0,29.8863333333333
V
0,-3.89909744262695
V
-1,0
BOT
0,29.893
V
0,-3.87907028198242
V
-1,0
BOT
0,29.8996666666667
V
0,-3.85713577270508
V
-1,0
BOT
0,29.9063333333333
V
0,-3.83520126342773
V
-1,0
BOT
0,29.913
V
0,-3.814697265625
V
-1,0
BOT
0,29.9196666666667
V
0,-3.79610061645508
V
-1,0
BOT
0,29.9263333333333
V
0,-3.77798080444336
V
-1,0
BOT
0,29.933
V
0,-3.76033782958984
V
-1,0
BOT
0,29.9396666666667
V
0,-3.74603271484375
V
-1,0
BOT
0,29.9463333333333
V
0,-3.73268127441406
V
-1,0
BOT
0,29.953
V
0,-3.71980667114258
V
-1,0
BOT
0,29.9596666666667
V
0,-3.70550155639648
V
-1,0
BOT
0,29.9663333333333
V
0,-3.692626953125
V
-1,0
BOT
0,29.973
V
0,-3.68070602416992
V
-1,0
BOT
0,29.9796666666667
V
0,-3.66783142089844
V
-1,0
BOT
0,29.9863333333333
V
0,-3.65161895751953
V
-1,0
BOT
0,29.993
V
0,-3.63445281982422
V
-1,0
BOT
0,29.9996666666667
V
0,-3.61967086791992
V
-1,0
BOT
0,30.0063333333333
V
0,-3.60679626464844
V
-1,0
BOT
0,30.013
V
0,-3.59487533569336
V
-1,0
BOT
0,30.0196666666667
V
0,-3.58152389526367
V
-1,0
BOT
0,30.0263333333333
V
0,-3.56864929199219
V
-1,0
BOT
0,30.033
V
0,-3.55768203735352
V
-1,0
BOT
0,30.0396666666667
V
0,-3.54862213134766
V
-1,0
BOT
0,30.0463333333333
V
0,-3.5400390625
V
-1,0
BOT
0,30.053
V
0,-3.53240966796875
V
-1,0
BOT
0,30.0596666666667
V
0,-3.52811813354492
V
-1,0
BOT
0,30.0663333333333
V
0,-3.52811813354492
V
-1,0
BOT
0,30.073
V
0,-3.52859497070312
V
-1,0
BOT
0,30.0796666666667
V
0,-3.52668762207031
V
-1,0
BOT
0,30.0863333333333
V
0,-3.52287292480469
V
-1,0
BOT
0,30.093
V
0,-3.51810455322266
V
-1,0
BOT
0,30.0996666666667
V
0,-3.51142883300781
V
-1,0
BOT
0,30.1063333333333
V
0,-3.50189208984375
V
-1,0
BOT
0,30.113
V
0,-3.4947395324707
V
-1,0
BOT
0,30.1196666666667
V
0,-3.49187850952148
V
-1,0
BOT
0,30.1263333333333
V
0,-3.49092483520508
V
-1,0
BOT
0,30.133
V
0,-3.49044799804687
V
-1,0
BOT
0,30.1396666666667
V
0,-3.49330902099609
V
-1,0
BOT
0,30.1463333333333
V
0,-3.49855422973633
V
-1,0
BOT
0,30.153
V
0,-3.50475311279297
V
-1,0
BOT
0,30.1596666666667
V
0,-3.51238250732422
V
-1,0
BOT
0,30.1663333333333
V
0,-3.52001190185547
V
-1,0
BOT
0,30.173
V
0,-3.52859497070312
V
-1,0
BOT
0,30.1796666666667
V
0,-3.53860855102539
V
-1,0
BOT
0,30.1863333333333
V
0,-3.55100631713867
V
-1,0
BOT
0,30.193
V
0,-3.56101989746094
V
-1,0
BOT
0,30.1996666666667
V
0,-3.56912612915039
V
-1,0
BOT
0,30.2063333333333
V
0,-3.58009338378906
V
-1,0
BOT
0,30.213
V
0,-3.59392166137695
V
-1,0
BOT
0,30.2196666666667
V
0,-3.60965728759766
V
-1,0
BOT
0,30.2263333333333
V
0,-3.62634658813477
V
-1,0
BOT
0,30.233
V
0,-3.64589691162109
V
-1,0
BOT
0,30.2396666666667
V
0,-3.66497039794922
V
-1,0
BOT
0,30.2463333333333
V
0,-3.68309020996094
V
-1,0
BOT
0,30.253
V
0,-3.69977951049805
V
-1,0
BOT
0,30.2596666666667
V
0,-3.71694564819336
V
-1,0
BOT
0,30.2663333333333
V
0,-3.73458862304687
V
-1,0
BOT
0,30.273
V
0,-3.753662109375
V
-1,0
BOT
0,30.2796666666667
V
0,-3.77225875854492
V
-1,0
BOT
0,30.2863333333333
V
0,-3.79323959350586
V
-1,0
BOT
0,30.293
V
0,-3.8151741027832
V
-1,0
BOT
0,30.2996666666667
V
0,-3.83663177490234
V
-1,0
BOT
0,30.3063333333333
V
0,-3.85713577270508
V
-1,0
BOT
0,30.313
V
0,-3.8762092590332
V
-1,0
BOT
0,30.3196666666667
V
0,-3.89719009399414
V
-1,0
BOT
0,30.3263333333333
V
0,-3.91912460327148
V
-1,0
BOT
0,30.333
V
0,-3.94296646118164
V
-1,0
BOT
0,30.3396666666667
V
0,-3.96871566772461
V
-1,0
BOT
0,30.3463333333333
V
0,-3.99351119995117
V
-1,0
BOT
0,30.353
V
0,-4.01592254638672
V
-1,0
BOT
0,30.3596666666667
V
0,-4.03499603271484
V
-1,0
BOT
0,30.3663333333333
V
0,-4.05311584472656
V
-1,0
BOT
0,30.373
V
0,-4.07028198242188
V
-1,0
BOT
0,30.3796666666667
V
0,-4.08697128295898
V
-1,0
BOT
0,30.3863333333333
V
0,-4.10556793212891
V
-1,0
BOT
0,30.393
V
0,-4.12607192993164
V
-1,0
BOT
0,30.3996666666667
V
0,-4.14752960205078
V
-1,0
BOT
0,30.4063333333333
V
0,-4.16660308837891
V
-1,0
BOT
0,30.413
V
0,-4.18186187744141
V
-1,0
BOT
0,30.4196666666667
V
0,-4.19712066650391
V
-1,0
BOT
0,30.4263333333333
V
0,-4.21047210693359
V
-1,0
BOT
0,30.433
V
0,-4.22334671020508
V
-1,0
BOT
0,30.4396666666667
V
0,-4.23622131347656
V
-1,0
BOT
0,30.4463333333333
V
0,-4.25195693969727
V
-1,0
BOT
0,30.453
V
0,-4.27055358886719
V
-1,0
BOT
0,30.4596666666667
V
0,-4.2872428894043
V
-1,0
BOT
0,30.4663333333333
V
0,-4.3025016784668
V
-1,0
BOT
0,30.473
V
0,-4.3177604675293
V
-1,0
BOT
0,30.4796666666667
V
0,-4.33254241943359
V
-1,0
BOT
0,30.4863333333333
V
0,-4.34350967407227
V
-1,0
BOT
0,30.493
V
0,-4.35018539428711
V
-1,0
BOT
0,30.4996666666667
V
0,-4.35733795166016
V
-1,0
BOT
0,30.5063333333333
V
0,-4.36592102050781
V
-1,0
BOT
0,30.513
V
0,-4.37450408935547
V
-1,0
BOT
0,30.5196666666667
V
0,-4.38356399536133
V
-1,0
BOT
0,30.5263333333333
V
0,-4.39214706420898
V
-1,0
BOT
0,30.533
V
0,-4.39977645874023
V
-1,0
BOT
0,30.5396666666667
V
0,-4.40549850463867
V
-1,0
BOT
0,30.5463333333333
V
0,-4.4093132019043
V
-1,0
BOT
0,30.553
V
0,-4.41265106201172
V
-1,0
BOT
0,30.5596666666667
V
0,-4.41503524780273
V
-1,0
BOT
0,30.5663333333333
V
0,-4.41694259643555
V
-1,0
BOT
0,30.573
V
0,-4.41741943359375
V
-1,0
BOT
0,30.5796666666667
V
0,-4.41694259643555
V
-1,0
BOT
0,30.5863333333333
V
0,-4.41455841064453
V
-1,0
BOT
0,30.593
V
0,-4.41312789916992
V
-1,0
BOT
0,30.5996666666667
V
0,-4.41408157348633
V
-1,0
BOT
0,30.6063333333333
V
0,-4.41741943359375
V
-1,0
BOT
0,30.613
V
0,-4.42314147949219
V
-1,0
BOT
0,30.6196666666667
V
0,-4.43029403686523
V
-1,0
BOT
0,30.6263333333333
V
0,-4.43792343139648
V
-1,0
BOT
0,30.633
V
0,-4.44459915161133
V
-1,0
BOT
0,30.6396666666667
V
0,-4.44841384887695
V
-1,0
BOT
0,30.6463333333333
V
0,-4.44984436035156
V
-1,0
BOT
0,30.653
V
0,-4.44984436035156
V
-1,0
BOT
0,30.6596666666667
V
0,-4.45079803466797
V
-1,0
BOT
0,30.6663333333333
V
0,-4.45222854614258
V
-1,0
BOT
0,30.673
V
0,-4.4560432434082
V
-1,0
BOT
0,30.6796666666667
V
0,-4.46128845214844
V
-1,0
BOT
0,30.6863333333333
V
0,-4.46701049804688
V
-1,0
BOT
0,30.693
V
0,-4.47225570678711
V
-1,0
BOT
0,30.6996666666667
V
0,-4.47750091552734
V
-1,0
BOT
0,30.7063333333333
V
0,-4.48322296142578
V
-1,0
BOT
0,30.713
V
0,-4.48846817016602
V
-1,0
BOT
0,30.7196666666667
V
0,-4.49323654174805
V
-1,0
BOT
0,30.7263333333333
V
0,-4.49943542480469
V
-1,0
BOT
0,30.733
V
0,-4.50897216796875
V
-1,0
BOT
0,30.7396666666667
V
0,-4.51898574829102
V
-1,0
BOT
0,30.7463333333333
V
0,-4.52756881713867
V
-1,0
BOT
0,30.753
V
0,-4.53472137451172
V
-1,0
BOT
0,30.7596666666667
V
0,-4.54139709472656
V
-1,0
BOT
0,30.7663333333333
V
0,-4.54807281494141
V
-1,0
BOT
0,30.773
V
0,-4.55474853515625
V
-1,0
BOT
0,30.7796666666667
V
0,-4.5619010925293
V
-1,0
BOT
0,30.7863333333333
V
0,-4.56857681274414
V
-1,0
BOT
0,30.793
V
0,-4.57429885864258
V
-1,0
BOT
0,30.7996666666667
V
0,-4.58002090454102
V
-1,0
BOT
0,30.8063333333333
V
0,-4.58669662475586
V
-1,0
BOT
0,30.813
V
0,-4.59194183349609
V
-1,0
BOT
0,30.8196666666667
V
0,-4.59814071655273
V
-1,0
BOT
0,30.8263333333333
V
0,-4.6076774597168
V
-1,0
BOT
0,30.833
V
0,-4.61912155151367
V
-1,0
BOT
0,30.8396666666667
V
0,-4.63008880615234
V
-1,0
BOT
0,30.8463333333333
V
0,-4.64057922363281
V
-1,0
BOT
0,30.853
V
0,-4.65154647827148
V
-1,0
BOT
0,30.8596666666667
V
0,-4.66346740722656
V
-1,0
BOT
0,30.8663333333333
V
0,-4.67395782470703
V
-1,0
BOT
0,30.873
V
0,-4.68540191650391
V
-1,0
BOT
0,30.8796666666667
V
0,-4.69732284545898
V
-1,0
BOT
0,30.8863333333333
V
0,-4.70733642578125
V
-1,0
BOT
0,30.893
V
0,-4.71830368041992
V
-1,0
BOT
0,30.8996666666667
V
0,-4.72927093505859
V
-1,0
BOT
0,30.9063333333333
V
0,-4.74214553833008
V
-1,0
BOT
0,30.913
V
0,-4.75311279296875
V
-1,0
BOT
0,30.9196666666667
V
0,-4.76264953613281
V
-1,0
BOT
0,30.9263333333333
V
0,-4.77075576782227
V
-1,0
BOT
0,30.933
V
0,-4.77838516235352
V
-1,0
BOT
0,30.9396666666667
V
0,-4.78553771972656
V
-1,0
BOT
0,30.9463333333333
V
0,-4.79030609130859
V
-1,0
BOT
0,30.953
V
0,-4.79507446289063
V
-1,0
BOT
0,30.9596666666667
V
0,-4.80079650878906
V
-1,0
BOT
0,30.9663333333333
V
0,-4.8060417175293
V
-1,0
BOT
0,30.973
V
0,-4.81033325195313
V
-1,0
BOT
0,30.9796666666667
V
0,-4.80794906616211
V
-1,0
BOT
0,30.9863333333333
V
0,-4.80270385742188
V
-1,0
BOT
0,30.993
V
0,-4.79650497436523
V
-1,0
BOT
0,30.9996666666667
V
0,-4.7907829284668
V
-1,0
BOT
0,31.0063333333333
V
0,-4.78506088256836
V
-1,0
BOT
0,31.013
V
0,-4.77695465087891
V
-1,0
BOT
0,31.0196666666667
V
0,-4.76932525634766
V
-1,0
BOT
0,31.0263333333333
V
0,-4.7607421875
V
-1,0
BOT
0,31.033
V
0,-4.74834442138672
V
-1,0
BOT
0,31.0396666666667
V
0,-4.73117828369141
V
-1,0
BOT
0,31.0463333333333
V
0,-4.71353530883789
V
-1,0
BOT
0,31.053
V
0,-4.69589233398438
V
-1,0
BOT
0,31.0596666666667
V
0,-4.67538833618164
V
-1,0
BOT
0,31.0663333333333
V
0,-4.65297698974609
V
-1,0
BOT
0,31.073
V
0,-4.62913513183594
V
-1,0
BOT
0,31.0796666666667
V
0,-4.60481643676758
V
-1,0
BOT
0,31.0863333333333
V
0,-4.57763671875
V
-1,0
BOT
0,31.093
V
0,-4.547119140625
V
-1,0
BOT
0,31.0996666666667
V
0,-4.5166015625
V
-1,0
BOT
0,31.1063333333333
V
0,-4.48751449584961
V
-1,0
BOT
0,31.113
V
0,-4.45842742919922
V
-1,0
BOT
0,31.1196666666667
V
0,-4.42981719970703
V
-1,0
BOT
0,31.1263333333333
V
0,-4.39929962158203
V
-1,0
BOT
0,31.133
V
0,-4.36925888061523
V
-1,0
BOT
0,31.1396666666667
V
0,-4.33921813964844
V
-1,0
BOT
0,31.1463333333333
V
0,-4.30822372436523
V
-1,0
BOT
0,31.153
V
0,-4.27818298339844
V
-1,0
BOT
0,31.1596666666667
V
0,-4.24814224243164
V
-1,0
BOT
0,31.1663333333333
V
0,-4.21762466430664
V
-1,0
BOT
0,31.173
V
0,-4.18663024902344
V
-1,0
BOT
0,31.1796666666667
V
0,-4.15563583374023
V
-1,0
BOT
0,31.1863333333333
V
0,-4.12607192993164
V
-1,0
BOT
0,31.193
V
0,-4.09603118896484
V
-1,0
BOT
0,31.1996666666667
V
0,-4.06503677368164
V
-1,0
BOT
0,31.2063333333333
V
0,-4.03451919555664
V
-1,0
BOT
0,31.213
V
0,-4.00590896606445
V
-1,0
BOT
0,31.2196666666667
V
0,-3.97682189941406
V
-1,0
BOT
0,31.2263333333333
V
0,-3.94535064697266
V
-1,0
BOT
0,31.233
V
0,-3.91340255737305
V
-1,0
BOT
0,31.2396666666667
V
0,-3.88336181640625
V
-1,0
BOT
0,31.2463333333333
V
0,-3.85856628417969
V
-1,0
BOT
0,31.253
V
0,-3.83663177490234
V
-1,0
BOT
0,31.2596666666667
V
0,-3.81612777709961
V
-1,0
BOT
0,31.2663333333333
V
0,-3.7999153137207
V
-1,0
BOT
0,31.273
V
0,-3.78656387329102
V
-1,0
BOT
0,31.2796666666667
V
0,-3.77273559570312
V
-1,0
BOT
0,31.2863333333333
V
0,-3.75556945800781
V
-1,0
BOT
0,31.293
V
0,-3.73649597167969
V
-1,0
BOT
0,31.2996666666667
V
0,-3.71885299682617
V
-1,0
BOT
0,31.3063333333333
V
0,-3.70216369628906
V
-1,0
BOT
0,31.313
V
0,-3.68738174438477
V
-1,0
BOT
0,31.3196666666667
V
0,-3.67450714111328
V
-1,0
BOT
0,31.3263333333333
V
0,-3.66449356079102
V
-1,0
BOT
0,31.333
V
0,-3.65591049194336
V
-1,0
BOT
0,31.3396666666667
V
0,-3.65018844604492
V
-1,0
BOT
0,31.3463333333333
V
0,-3.6463737487793
V
-1,0
BOT
0,31.353
V
0,-3.64351272583008
V
-1,0
BOT
0,31.3596666666667
V
0,-3.63922119140625
V
-1,0
BOT
0,31.3663333333333
V
0,-3.63540649414062
V
-1,0
BOT
0,31.373
V
0,-3.63349914550781
V
-1,0
BOT
0,31.3796666666667
V
0,-3.6311149597168
V
-1,0
BOT
0,31.3863333333333
V
0,-3.62873077392578
V
-1,0
BOT
0,31.393
V
0,-3.62634658813477
V
-1,0
BOT
0,31.3996666666667
V
0,-3.62634658813477
V
-1,0
BOT
0,31.4063333333333
V
0,-3.62968444824219
V
-1,0
BOT
0,31.413
V
0,-3.63636016845703
V
-1,0
BOT
0,31.4196666666667
V
0,-3.64446640014648
V
-1,0
BOT
0,31.4263333333333
V
0,-3.65209579467773
V
-1,0
BOT
0,31.433
V
0,-3.66115570068359
V
-1,0
BOT
0,31.4396666666667
V
0,-3.67546081542969
V
-1,0
BOT
0,31.4463333333333
V
0,-3.69119644165039
V
-1,0
BOT
0,31.453
V
0,-3.70550155639648
V
-1,0
BOT
0,31.4596666666667
V
0,-3.71980667114258
V
-1,0
BOT
0,31.4663333333333
V
0,-3.73601913452148
V
-1,0
BOT
0,31.473
V
0,-3.7531852722168
V
-1,0
BOT
0,31.4796666666667
V
0,-3.76653671264648
V
-1,0
BOT
0,31.4863333333333
V
0,-3.77607345581055
V
-1,0
BOT
0,31.493
V
0,-3.78322601318359
V
-1,0
BOT
0,31.4996666666667
V
0,-3.79180908203125
V
-1,0
BOT
0,31.5063333333333
V
0,-3.80229949951172
V
-1,0
BOT
0,31.513
V
0,-3.8142204284668
V
-1,0
BOT
0,31.5196666666667
V
0,-3.82804870605469
V
-1,0
BOT
0,31.5263333333333
V
0,-3.84378433227539
V
-1,0
BOT
0,31.533
V
0,-3.86476516723633
V
-1,0
BOT
0,31.5396666666667
V
0,-3.88813018798828
V
-1,0
BOT
0,31.5463333333333
V
0,-3.91101837158203
V
-1,0
BOT
0,31.553
V
0,-3.93390655517578
V
-1,0
BOT
0,31.5596666666667
V
0,-3.95774841308594
V
-1,0
BOT
0,31.5663333333333
V
0,-3.98159027099609
V
-1,0
BOT
0,31.573
V
0,-4.00447845458984
V
-1,0
BOT
0,31.5796666666667
V
0,-4.02593612670898
V
-1,0
BOT
0,31.5863333333333
V
0,-4.04644012451172
V
-1,0
BOT
0,31.593
V
0,-4.06503677368164
V
-1,0
BOT
0,31.5996666666667
V
0,-4.08315658569336
V
-1,0
BOT
0,31.6063333333333
V
0,-4.10032272338867
V
-1,0
BOT
0,31.613
V
0,-4.11653518676758
V
-1,0
BOT
0,31.6196666666667
V
0,-4.13322448730469
V
-1,0
BOT
0,31.6263333333333
V
0,-4.15229797363281
V
-1,0
BOT
0,31.633
V
0,-4.17470932006836
V
-1,0
BOT
0,31.6396666666667
V
0,-4.19950485229492
V
-1,0
BOT
0,31.6463333333333
V
0,-4.22525405883789
V
-1,0
BOT
0,31.653
V
0,-4.25195693969727
V
-1,0
BOT
0,31.6596666666667
V
0,-4.27722930908203
V
-1,0
BOT
0,31.6663333333333
V
0,-4.30011749267578
V
-1,0
BOT
0,31.673
V
0,-4.32109832763672
V
-1,0
BOT
0,31.6796666666667
V
0,-4.34064865112305
V
-1,0
BOT
0,31.6863333333333
V
0,-4.36067581176758
V
-1,0
BOT
0,31.693
V
0,-4.38261032104492
V
-1,0
BOT
0,31.6996666666667
V
0,-4.40454483032227
V
-1,0
BOT
0,31.7063333333333
V
0,-4.42743301391602
V
-1,0
BOT
0,31.713
V
0,-4.44936752319336
V
-1,0
BOT
0,31.7196666666667
V
0,-4.46939468383789
V
-1,0
BOT
0,31.7263333333333
V
0,-4.48513031005859
V
-1,0
BOT
0,31.733
V
0,-4.49800491333008
V
-1,0
BOT
0,31.7396666666667
V
0,-4.51040267944336
V
-1,0
BOT
0,31.7463333333333
V
0,-4.52136993408203
V
-1,0
BOT
0,31.753
V
0,-4.52995300292969
V
-1,0
BOT
0,31.7596666666667
V
0,-4.53948974609375
V
-1,0
BOT
0,31.7663333333333
V
0,-4.55045700073242
V
-1,0
BOT
0,31.773
V
0,-4.56142425537109
V
-1,0
BOT
0,31.7796666666667
V
0,-4.57048416137695
V
-1,0
BOT
0,31.7863333333333
V
0,-4.58097457885742
V
-1,0
BOT
0,31.793
V
0,-4.59432601928711
V
-1,0
BOT
0,31.7996666666667
V
0,-4.60720062255859
V
-1,0
BOT
0,31.8063333333333
V
0,-4.61673736572266
V
-1,0
BOT
0,31.813
V
0,-4.62627410888672
V
-1,0
BOT
0,31.8196666666667
V
0,-4.638671875
V
-1,0
BOT
0,31.8263333333333
V
0,-4.65106964111328
V
-1,0
BOT
0,31.833
V
0,-4.66346740722656
V
-1,0
BOT
0,31.8396666666667
V
0,-4.67634201049805
V
-1,0
BOT
0,31.8463333333333
V
0,-4.69350814819336
V
-1,0
BOT
0,31.853
V
0,-4.71019744873047
V
-1,0
BOT
0,31.8596666666667
V
0,-4.72497940063477
V
-1,0
BOT
0,31.8663333333333
V
0,-4.73642349243164
V
-1,0
BOT
0,31.873
V
0,-4.74691390991211
V
-1,0
BOT
0,31.8796666666667
V
0,-4.75740432739258
V
-1,0
BOT
0,31.8863333333333
V
0,-4.76789474487305
V
-1,0
BOT
0,31.893
V
0,-4.77933883666992
V
-1,0
BOT
0,31.8996666666667
V
0,-4.78982925415039
V
-1,0
BOT
0,31.9063333333333
V
0,-4.80175018310547
V
-1,0
BOT
0,31.913
V
0,-4.81319427490234
V
-1,0
BOT
0,31.9196666666667
V
0,-4.82320785522461
V
-1,0
BOT
0,31.9263333333333
V
0,-4.83274459838867
V
-1,0
BOT
0,31.933
V
0,-4.84275817871094
V
-1,0
BOT
0,31.9396666666667
V
0,-4.85372543334961
V
-1,0
BOT
0,31.9463333333333
V
0,-4.86516952514648
V
-1,0
BOT
0,31.953
V
0,-4.87661361694336
V
-1,0
BOT
0,31.9596666666667
V
0,-4.88615036010742
V
-1,0
BOT
0,31.9663333333333
V
0,-4.89330291748047
V
-1,0
BOT
0,31.973
V
0,-4.8985481262207
V
-1,0
BOT
0,31.9796666666667
V
0,-4.90093231201172
V
-1,0
BOT
0,31.9863333333333
V
0,-4.89950180053711
V
-1,0
BOT
0,31.993
V
0,-4.8975944519043
V
-1,0
BOT
0,31.9996666666667
V
0,-4.89616394042969
V
-1,0
BOT
0,32.0063333333333
V
0,-4.89473342895508
V
-1,0
BOT
0,32.013
V
0,-4.89377975463867
V
-1,0
BOT
0,32.0196666666667
V
0,-4.89568710327148
V
-1,0
BOT
0,32.0263333333333
V
0,-4.89902496337891
V
-1,0
BOT
0,32.033
V
0,-4.89997863769531
V
-1,0
BOT
0,32.0396666666667
V
0,-4.89902496337891
V
-1,0
BOT
0,32.0463333333333
V
0,-4.8980712890625
V
-1,0
BOT
0,32.053
V
0,-4.89616394042969
V
-1,0
BOT
0,32.0596666666667
V
0,-4.88948822021484
V
-1,0
BOT
0,32.0663333333333
V
0,-4.87947463989258
V
-1,0
BOT
0,32.073
V
0,-4.86993789672852
V
-1,0
BOT
0,32.0796666666667
V
0,-4.86135482788086
V
-1,0
BOT
0,32.0863333333333
V
0,-4.85086441040039
V
-1,0
BOT
0,32.093
V
0,-4.84085083007813
V
-1,0
BOT
0,32.0996666666667
V
0,-4.83465194702148
V
-1,0
BOT
0,32.1063333333333
V
0,-4.83274459838867
V
-1,0
BOT
0,32.113
V
0,-4.83036041259766
V
-1,0
BOT
0,32.1196666666667
V
0,-4.82702255249023
V
-1,0
BOT
0,32.1263333333333
V
0,-4.82416152954102
V
-1,0
BOT
0,32.133
V
0,-4.82082366943359
V
-1,0
BOT
0,32.1396666666667
V
0,-4.81414794921875
V
-1,0
BOT
0,32.1463333333333
V
0,-4.80413436889648
V
-1,0
BOT
0,32.153
V
0,-4.79459762573242
V
-1,0
BOT
0,32.1596666666667
V
0,-4.78792190551758
V
-1,0
BOT
0,32.1663333333333
V
0,-4.78363037109375
V
-1,0
BOT
0,32.173
V
0,-4.77981567382813
V
-1,0
BOT
0,32.1796666666667
V
0,-4.77695465087891
V
-1,0
BOT
0,32.1863333333333
V
0,-4.77457046508789
V
-1,0
BOT
0,32.193
V
0,-4.77313995361328
V
-1,0
BOT
0,32.1996666666667
V
0,-4.77170944213867
V
-1,0
BOT
0,32.2063333333333
V
0,-4.77027893066406
V
-1,0
BOT
0,32.213
V
0,-4.76884841918945
V
-1,0
BOT
0,32.2196666666667
V
0,-4.76598739624023
V
-1,0
BOT
0,32.2263333333333
V
0,-4.76408004760742
V
-1,0
BOT
0,32.233
V
0,-4.76264953613281
V
-1,0
BOT
0,32.2396666666667
V
0,-4.7602653503418
V
-1,0
BOT
0,32.2463333333333
V
0,-4.75597381591797
V
-1,0
BOT
0,32.253
V
0,-4.75168228149414
V
-1,0
BOT
0,32.2596666666667
V
0,-4.74834442138672
V
-1,0
BOT
0,32.2663333333333
V
0,-4.74643707275391
V
-1,0
BOT
0,32.273
V
0,-4.74214553833008
V
-1,0
BOT
0,32.2796666666667
V
0,-4.73690032958984
V
-1,0
BOT
0,32.2863333333333
V
0,-4.73260879516602
V
-1,0
BOT
0,32.293
V
0,-4.72927093505859
V
-1,0
BOT
0,32.2996666666667
V
0,-4.72593307495117
V
-1,0
BOT
0,32.3063333333333
V
0,-4.72116470336914
V
-1,0
BOT
0,32.313
V
0,-4.71878051757813
V
-1,0
BOT
0,32.3196666666667
V
0,-4.71830368041992
V
-1,0
BOT
0,32.3263333333333
V
0,-4.71973419189453
V
-1,0
BOT
0,32.333
V
0,-4.72211837768555
V
-1,0
BOT
0,32.3396666666667
V
0,-4.72450256347656
V
-1,0
BOT
0,32.3463333333333
V
0,-4.72736358642578
V
-1,0
BOT
0,32.353
V
0,-4.7297477722168
V
-1,0
BOT
0,32.3596666666667
V
0,-4.73165512084961
V
-1,0
BOT
0,32.3663333333333
V
0,-4.7297477722168
V
-1,0
BOT
0,32.373
V
0,-4.72402572631836
V
-1,0
BOT
0,32.3796666666667
V
0,-4.71925735473633
V
-1,0
BOT
0,32.3863333333333
V
0,-4.71591949462891
V
-1,0
BOT
0,32.393
V
0,-4.71162796020508
V
-1,0
BOT
0,32.3996666666667
V
0,-4.70495223999023
V
-1,0
BOT
0,32.4063333333333
V
0,-4.69684600830078
V
-1,0
BOT
0,32.413
V
0,-4.69017028808594
V
-1,0
BOT
0,32.4196666666667
V
0,-4.68254089355469
V
-1,0
BOT
0,32.4263333333333
V
0,-4.67443466186523
V
-1,0
BOT
0,32.433
V
0,-4.66489791870117
V
-1,0
BOT
0,32.4396666666667
V
0,-4.65583801269531
V
-1,0
BOT
0,32.4463333333333
V
0,-4.64725494384766
V
-1,0
BOT
0,32.453
V
0,-4.63724136352539
V
-1,0
BOT
0,32.4596666666667
V
0,-4.62675094604492
V
-1,0
BOT
0,32.4663333333333
V
0,-4.61673736572266
V
-1,0
BOT
0,32.473
V
0,-4.60672378540039
V
-1,0
BOT
0,32.4796666666667
V
0,-4.60004806518555
V
-1,0
BOT
0,32.4863333333333
V
0,-4.59480285644531
V
-1,0
BOT
0,32.493
V
0,-4.59051132202148
V
-1,0
BOT
0,32.4996666666667
V
0,-4.58574295043945
V
-1,0
BOT
0,32.5063333333333
V
0,-4.57859039306641
V
-1,0
BOT
0,32.513
V
0,-4.57000732421875
V
-1,0
BOT
0,32.5196666666667
V
0,-4.55856323242188
V
-1,0
BOT
0,32.5263333333333
V
0,-4.54902648925781
V
-1,0
BOT
0,32.533
V
0,-4.54139709472656
V
-1,0
BOT
0,32.5396666666667
V
0,-4.53662872314453
V
-1,0
BOT
0,32.5463333333333
V
0,-4.53376770019531
V
-1,0
BOT
0,32.553
V
0,-4.5318603515625
V
-1,0
BOT
0,32.5596666666667
V
0,-4.52995300292969
V
-1,0
BOT
0,32.5663333333333
V
0,-4.52423095703125
V
-1,0
BOT
0,32.573
V
0,-4.51517105102539
V
-1,0
BOT
0,32.5796666666667
V
0,-4.50468063354492
V
-1,0
BOT
0,32.5863333333333
V
0,-4.49228286743164
V
-1,0
BOT
0,32.593
V
0,-4.48083877563477
V
-1,0
BOT
0,32.5996666666667
V
0,-4.47177886962891
V
-1,0
BOT
0,32.6063333333333
V
0,-4.46796417236328
V
-1,0
BOT
0,32.613
V
0,-4.46510314941406
V
-1,0
BOT
0,32.6196666666667
V
0,-4.46271896362305
V
-1,0
BOT
0,32.6263333333333
V
0,-4.46128845214844
V
-1,0
BOT
0,32.633
V
0,-4.46081161499023
V
-1,0
BOT
0,32.6396666666667
V
0,-4.45890426635742
V
-1,0
BOT
0,32.6463333333333
V
0,-4.45461273193359
V
-1,0
BOT
0,32.653
V
0,-4.45127487182617
V
-1,0
BOT
0,32.6596666666667
V
0,-4.44841384887695
V
-1,0
BOT
0,32.6663333333333
V
0,-4.44555282592773
V
-1,0
BOT
0,32.673
V
0,-4.44126129150391
V
-1,0
BOT
0,32.6796666666667
V
0,-4.43649291992188
V
-1,0
BOT
0,32.6863333333333
V
0,-4.43267822265625
V
-1,0
BOT
0,32.693
V
0,-4.43029403686523
V
-1,0
BOT
0,32.6996666666667
V
0,-4.42981719970703
V
-1,0
BOT
0,32.7063333333333
V
0,-4.43124771118164
V
-1,0
BOT
0,32.713
V
0,-4.43363189697266
V
-1,0
BOT
0,32.7196666666667
V
0,-4.43506240844727
V
-1,0
BOT
0,32.7263333333333
V
0,-4.43458557128906
V
-1,0
BOT
0,32.733
V
0,-4.43220138549805
V
-1,0
BOT
0,32.7396666666667
V
0,-4.42934036254883
V
-1,0
BOT
0,32.7463333333333
V
0,-4.4255256652832
V
-1,0
BOT
0,32.753
V
0,-4.42409515380859
V
-1,0
BOT
0,32.7596666666667
V
0,-4.42409515380859
V
-1,0
BOT
0,32.7663333333333
V
0,-4.4255256652832
V
-1,0
BOT
0,32.773
V
0,-4.42647933959961
V
-1,0
BOT
0,32.7796666666667
V
0,-4.42838668823242
V
-1,0
BOT
0,32.7863333333333
V
0,-4.42886352539063
V
-1,0
BOT
0,32.793
V
0,-4.42695617675781
V
-1,0
BOT
0,32.7996666666667
V
0,-4.42266464233398
V
-1,0
BOT
0,32.8063333333333
V
0,-4.41789627075195
V
-1,0
BOT
0,32.813
V
0,-4.41265106201172
V
-1,0
BOT
0,32.8196666666667
V
0,-4.40454483032227
V
-1,0
BOT
0,32.8263333333333
V
0,-4.3940544128418
V
-1,0
BOT
0,32.833
V
0,-4.38356399536133
V
-1,0
BOT
0,32.8396666666667
V
0,-4.37545776367188
V
-1,0
BOT
0,32.8463333333333
V
0,-4.36782836914063
V
-1,0
BOT
0,32.853
V
0,-4.36162948608398
V
-1,0
BOT
0,32.8596666666667
V
0,-4.35733795166016
V
-1,0
BOT
0,32.8663333333333
V
0,-4.35543060302734
V
-1,0
BOT
0,32.873
V
0,-4.35352325439453
V
-1,0
BOT
0,32.8796666666667
V
0,-4.3482780456543
V
-1,0
BOT
0,32.8863333333333
V
0,-4.34112548828125
V
-1,0
BOT
0,32.893
V
0,-4.3330192565918
V
-1,0
BOT
0,32.8996666666667
V
0,-4.32634353637695
V
-1,0
BOT
0,32.9063333333333
V
0,-4.31966781616211
V
-1,0
BOT
0,32.913
V
0,-4.31442260742188
V
-1,0
BOT
0,32.9196666666667
V
0,-4.31251525878906
V
-1,0
BOT
0,32.9263333333333
V
0,-4.31299209594727
V
-1,0
BOT
0,32.933
V
0,-4.31537628173828
V
-1,0
BOT
0,32.9396666666667
V
0,-4.3182373046875
V
-1,0
BOT
0,32.9463333333333
V
0,-4.32109832763672
V
-1,0
BOT
0,32.953
V
0,-4.32443618774414
V
-1,0
BOT
0,32.9596666666667
V
0,-4.32729721069336
V
-1,0
BOT
0,32.9663333333333
V
0,-4.33015823364258
V
-1,0
BOT
0,32.973
V
0,-4.33349609375
V
-1,0
BOT
0,32.9796666666667
V
0,-4.33921813964844
V
-1,0
BOT
0,32.9863333333333
V
0,-4.34684753417969
V
-1,0
BOT
0,32.993
V
0,-4.35400009155273
V
-1,0
BOT
0,32.9996666666667
V
0,-4.3644905090332
V
-1,0
BOT
0,33.0063333333333
V
0,-4.37736511230469
V
-1,0
BOT
0,33.013
V
0,-4.39023971557617
V
-1,0
BOT
0,33.0196666666667
V
0,-4.40073013305664
V
-1,0
BOT
0,33.0263333333333
V
0,-4.41074371337891
V
-1,0
BOT
0,33.033
V
0,-4.42361831665039
V
-1,0
BOT
0,33.0396666666667
V
0,-4.43744659423828
V
-1,0
BOT
0,33.0463333333333
V
0,-4.45127487182617
V
-1,0
BOT
0,33.053
V
0,-4.46557998657227
V
-1,0
BOT
0,33.0596666666667
V
0,-4.48226928710938
V
-1,0
BOT
0,33.0663333333333
V
0,-4.50038909912109
V
-1,0
BOT
0,33.073
V
0,-4.51803207397461
V
-1,0
BOT
0,33.0796666666667
V
0,-4.53281402587891
V
-1,0
BOT
0,33.0863333333333
V
0,-4.547119140625
V
-1,0
BOT
0,33.093
V
0,-4.5619010925293
V
-1,0
BOT
0,33.0996666666667
V
0,-4.57572937011719
V
-1,0
BOT
0,33.1063333333333
V
0,-4.58717346191406
V
-1,0
BOT
0,33.113
V
0,-4.59814071655273
V
-1,0
BOT
0,33.1196666666667
V
0,-4.61006164550781
V
-1,0
BOT
0,33.1263333333333
V
0,-4.6229362487793
V
-1,0
BOT
0,33.133
V
0,-4.63581085205078
V
-1,0
BOT
0,33.1396666666667
V
0,-4.65106964111328
V
-1,0
BOT
0,33.1463333333333
V
0,-4.66823577880859
V
-1,0
BOT
0,33.153
V
0,-4.68683242797852
V
-1,0
BOT
0,33.1596666666667
V
0,-4.70590591430664
V
-1,0
BOT
0,33.1663333333333
V
0,-4.72211837768555
V
-1,0
BOT
0,33.173
V
0,-4.73594665527344
V
-1,0
BOT
0,33.1796666666667
V
0,-4.74834442138672
V
-1,0
BOT
0,33.1863333333333
V
0,-4.75978851318359
V
-1,0
BOT
0,33.193
V
0,-4.77123260498047
V
-1,0
BOT
0,33.1996666666667
V
0,-4.78267669677734
V
-1,0
BOT
0,33.2063333333333
V
0,-4.79555130004883
V
-1,0
BOT
0,33.213
V
0,-4.80842590332031
V
-1,0
BOT
0,33.2196666666667
V
0,-4.81986999511719
V
-1,0
BOT
0,33.2263333333333
V
0,-4.83131408691406
V
-1,0
BOT
0,33.233
V
0,-4.84037399291992
V
-1,0
BOT
0,33.2396666666667
V
0,-4.84895706176758
V
-1,0
BOT
0,33.2463333333333
V
0,-4.85801696777344
V
-1,0
BOT
0,33.253
V
0,-4.86946105957031
V
-1,0
BOT
0,33.2596666666667
V
0,-4.88424301147461
V
-1,0
BOT
0,33.2663333333333
V
0,-4.8985481262207
V
-1,0
BOT
0,33.273
V
0,-4.91428375244141
V
-1,0
BOT
0,33.2796666666667
V
0,-4.92954254150391
V
-1,0
BOT
0,33.2863333333333
V
0,-4.94384765625
V
-1,0
BOT
0,33.293
V
0,-4.95719909667969
V
-1,0
BOT
0,33.2996666666667
V
0,-4.96768951416016
V
-1,0
BOT
0,33.3063333333333
V
0,-4.97674942016602
V
-1,0
BOT
0,33.313
V
0,-4.98533248901367
V
-1,0
BOT
0,33.3196666666667
V
0,-4.99343872070313
V
-1,0
BOT
0,33.3263333333333
V
0,-5.00154495239258
V
-1,0
BOT
0,33.333
V
0,-5.00965118408203
V
-1,0
BOT
0,33.3396666666667
V
0,-5.01871109008789
V
-1,0
BOT
0,33.3463333333333
V
0,-5.02777099609375
V
-1,0
BOT
0,33.353
V
0,-5.035400390625
V
-1,0
BOT
0,33.3596666666667
V
0,-5.04159927368164
V
-1,0
BOT
0,33.3663333333333
V
0,-5.04589080810547
V
-1,0
BOT
0,33.373
V
0,-5.04684448242188
V
-1,0
BOT
0,33.3796666666667
V
0,-5.04541397094727
V
-1,0
BOT
0,33.3863333333333
V
0,-5.04255294799805
V
-1,0
BOT
0,33.393
V
0,-5.03969192504883
V
-1,0
BOT
0,33.3996666666667
V
0,-5.03826141357422
V
-1,0
BOT
0,33.4063333333333
V
0,-5.03730773925781
V
-1,0
BOT
0,33.413
V
0,-5.03396987915039
V
-1,0
BOT
0,33.4196666666667
V
0,-5.02967834472656
V
-1,0
BOT
0,33.4263333333333
V
0,-5.02538681030273
V
-1,0
BOT
0,33.433
V
0,-5.0201416015625
V
-1,0
BOT
0,33.4396666666667
V
0,-5.01060485839844
V
-1,0
BOT
0,33.4463333333333
V
0,-5.00059127807617
V
-1,0
BOT
0,33.453
V
0,-4.99296188354492
V
-1,0
BOT
0,33.4596666666667
V
0,-4.98723983764648
V
-1,0
BOT
0,33.4663333333333
V
0,-4.97913360595703
V
-1,0
BOT
0,33.473
V
0,-4.96625900268555
V
-1,0
BOT
0,33.4796666666667
V
0,-4.95004653930664
V
-1,0
BOT
0,33.4863333333333
V
0,-4.93049621582031
V
-1,0
BOT
0,33.493
V
0,-4.90760803222656
V
-1,0
BOT
0,33.4996666666667
V
0,-4.8823356628418
V
-1,0
BOT
0,33.5063333333333
V
0,-4.85515594482422
V
-1,0
BOT
0,33.513
V
0,-4.82749938964844
V
-1,0
BOT
0,33.5196666666667
V
0,-4.80079650878906
V
-1,0
BOT
0,33.5263333333333
V
0,-4.77504730224609
V
-1,0
BOT
0,33.533
V
0,-4.74691390991211
V
-1,0
BOT
0,33.5396666666667
V
0,-4.71735000610352
V
-1,0
BOT
0,33.5463333333333
V
0,-4.68826293945313
V
-1,0
BOT
0,33.553
V
0,-4.66060638427734
V
-1,0
BOT
0,33.5596666666667
V
0,-4.63294982910156
V
-1,0
BOT
0,33.5663333333333
V
0,-4.60147857666016
V
-1,0
BOT
0,33.573
V
0,-4.56905364990234
V
-1,0
BOT
0,33.5796666666667
V
0,-4.53758239746094
V
-1,0
BOT
0,33.5863333333333
V
0,-4.50706481933594
V
-1,0
BOT
0,33.593
V
0,-4.47511672973633
V
-1,0
BOT
0,33.5996666666667
V
0,-4.44269180297852
V
-1,0
BOT
0,33.6063333333333
V
0,-4.41169738769531
V
-1,0
BOT
0,33.613
V
0,-4.38165664672852
V
-1,0
BOT
0,33.6196666666667
V
0,-4.35066223144531
V
-1,0
BOT
0,33.6263333333333
V
0,-4.31680679321289
V
-1,0
BOT
0,33.633
V
0,-4.28152084350586
V
-1,0
BOT
0,33.6396666666667
V
0,-4.24385070800781
V
-1,0
BOT
0,33.6463333333333
V
0,-4.20427322387695
V
-1,0
BOT
0,33.653
V
0,-4.16326522827148
V
-1,0
BOT
0,33.6596666666667
V
0,-4.12321090698242
V
-1,0
BOT
0,33.6663333333333
V
0,-4.08506393432617
V
-1,0
BOT
0,33.673
V
0,-4.04787063598633
V
-1,0
BOT
0,33.6796666666667
V
0,-4.01067733764648
V
-1,0
BOT
0,33.6863333333333
V
0,-3.97491455078125
V
-1,0
BOT
0,33.693
V
0,-3.94105911254883
V
-1,0
BOT
0,33.6996666666667
V
0,-3.9067268371582
V
-1,0
BOT
0,33.7063333333333
V
0,-3.87191772460937
V
-1,0
BOT
0,33.713
V
0,-3.83806228637695
V
-1,0
BOT
0,33.7196666666667
V
0,-3.80611419677734
V
-1,0
BOT
0,33.7263333333333
V
0,-3.77511978149414
V
-1,0
BOT
0,33.733
V
0,-3.74364852905273
V
-1,0
BOT
0,33.7396666666667
V
0,-3.71122360229492
V
-1,0
BOT
0,33.7463333333333
V
0,-3.6778450012207
V
-1,0
BOT
0,33.753
V
0,-3.64208221435547
V
-1,0
BOT
0,33.7596666666667
V
0,-3.60631942749023
V
-1,0
BOT
0,33.7663333333333
V
0,-3.56912612915039
V
-1,0
BOT
0,33.773
V
0,-3.53240966796875
V
-1,0
BOT
0,33.7796666666667
V
0,-3.49569320678711
V
-1,0
BOT
0,33.7863333333333
V
0,-3.46040725708008
V
-1,0
BOT
0,33.793
V
0,-3.42702865600586
V
-1,0
BOT
0,33.7996666666667
V
0,-3.39508056640625
V
-1,0
BOT
0,33.8063333333333
V
0,-3.36360931396484
V
-1,0
BOT
0,33.813
V
0,-3.33166122436523
V
-1,0
BOT
0,33.8196666666667
V
0,-3.30018997192383
V
-1,0
BOT
0,33.8263333333333
V
0,-3.26967239379883
V
-1,0
BOT
0,33.833
V
0,-3.23867797851562
V
-1,0
BOT
0,33.8396666666667
V
0,-3.20672988891602
V
-1,0
BOT
0,33.8463333333333
V
0,-3.17668914794922
V
-1,0
BOT
0,33.853
V
0,-3.14807891845703
V
-1,0
BOT
0,33.8596666666667
V
0,-3.11899185180664
V
-1,0
BOT
0,33.8663333333333
V
0,-3.08704376220703
V
-1,0
BOT
0,33.873
V
0,-3.05509567260742
V
-1,0
BOT
0,33.8796666666667
V
0,-3.02362442016602
V
-1,0
BOT
0,33.8863333333333
V
0,-2.99263000488281
V
-1,0
BOT
0,33.893
V
0,-2.9606819152832
V
-1,0
BOT
0,33.8996666666667
V
0,-2.92778015136719
V
-1,0
BOT
0,33.9063333333333
V
0,-2.89535522460937
V
-1,0
BOT
0,33.913
V
0,-2.86388397216797
V
-1,0
BOT
0,33.9196666666667
V
0,-2.83193588256836
V
-1,0
BOT
0,33.9263333333333
V
0,-2.79808044433594
V
-1,0
BOT
0,33.933
V
0,-2.76327133178711
V
-1,0
BOT
0,33.9396666666667
V
0,-2.72750854492187
V
-1,0
BOT
0,33.9463333333333
V
0,-2.69269943237305
V
-1,0
BOT
0,33.953
V
0,-2.65836715698242
V
-1,0
BOT
0,33.9596666666667
V
0,-2.62451171875
V
-1,0
BOT
0,33.9663333333333
V
0,-2.58874893188477
V
-1,0
BOT
0,33.973
V
0,-2.54917144775391
V
-1,0
BOT
0,33.9796666666667
V
0,-2.50816345214844
V
-1,0
BOT
0,33.9863333333333
V
0,-2.46524810791016
V
-1,0
BOT
0,33.993
V
0,-2.41994857788086
V
-1,0
BOT
0,33.9996666666667
V
0,-2.37083435058594
V
-1,0
BOT
0,34.0063333333333
V
0,-2.3198127746582
V
-1,0
BOT
0,34.013
V
0,-2.26783752441406
V
-1,0
BOT
0,34.0196666666667
V
0,-2.21633911132812
V
-1,0
BOT
0,34.0263333333333
V
0,-2.16293334960937
V
-1,0
BOT
0,34.033
V
0,-2.1052360534668
V
-1,0
BOT
0,34.0396666666667
V
0,-2.04610824584961
V
-1,0
BOT
0,34.0463333333333
V
0,-1.98650360107422
V
-1,0
BOT
0,34.053
V
0,-1.92689895629883
V
-1,0
BOT
0,34.0596666666667
V
0,-1.86538696289062
V
-1,0
BOT
0,34.0663333333333
V
0,-1.79958343505859
V
-1,0
BOT
0,34.073
V
0,-1.73234939575195
V
-1,0
BOT
0,34.0796666666667
V
0,-1.66416168212891
V
-1,0
BOT
0,34.0863333333333
V
0,-1.59311294555664
V
-1,0
BOT
0,34.093
V
0,-1.51872634887695
V
-1,0
BOT
0,34.0996666666667
V
0,-1.44195556640625
V
-1,0
BOT
0,34.1063333333333
V
0,-1.36613845825195
V
-1,0
BOT
0,34.113
V
0,-1.29175186157227
V
-1,0
BOT
0,34.1196666666667
V
0,-1.21641159057617
V
-1,0
BOT
0,34.1263333333333
V
0,-1.14011764526367
V
-1,0
BOT
0,34.133
V
0,-1.06191635131836
V
-1,0
BOT
0,34.1396666666667
V
0,-0.982284545898438
V
-1,0
BOT
0,34.1463333333333
V
0,-0.898838043212891
V
-1,0
BOT
0,34.153
V
0,-0.812530517578125
V
-1,0
BOT
0,34.1596666666667
V
0,-0.726699829101563
V
-1,0
BOT
0,34.1663333333333
V
0,-0.641345977783203
V
-1,0
BOT
0,34.173
V
0,-0.556468963623047
V
-1,0
BOT
0,34.1796666666667
V
0,-0.470161437988281
V
-1,0
BOT
0,34.1863333333333
V
0,-0.384330749511719
V
-1,0
BOT
0,34.193
V
0,-0.298500061035156
V
-1,0
BOT
0,34.1996666666667
V
0,-0.211715698242187
V
-1,0
BOT
0,34.2063333333333
V
0,-0.123023986816406
V
-1,0
BOT
0,34.213
V
0,-0.0367164611816406
V
-1,0
BOT
0,34.2196666666667
V
0,0.0452995300292969
V
-1,0
BOT
0,34.2263333333333
V
0,0.124454498291016
V
-1,0
BOT
0,34.233
V
0,0.202178955078125
V
-1,0
BOT
0,34.2396666666667
V
0,0.280380249023437
V
-1,0
BOT
0,34.2463333333333
V
0,0.358104705810547
V
-1,0
BOT
0,34.253
V
0,0.435829162597656
V
-1,0
BOT
0,34.2596666666667
V
0,0.513553619384766
V
-1,0
BOT
0,34.2663333333333
V
0,0.587940216064453
V
-1,0
BOT
0,34.273
V
0,0.658035278320313
V
-1,0
BOT
0,34.2796666666667
V
0,0.723838806152344
V
-1,0
BOT
0,34.2863333333333
V
0,0.787734985351563
V
-1,0
BOT
0,34.293
V
0,0.848770141601563
V
-1,0
BOT
0,34.2996666666667
V
0,0.905513763427734
V
-1,0
BOT
0,34.3063333333333
V
0,0.959873199462891
V
-1,0
BOT
0,34.313
V
0,1.01232528686523
V
-1,0
BOT
0,34.3196666666667
V
0,1.06239318847656
V
-1,0
BOT
0,34.3263333333333
V
0,1.10626220703125
V
-1,0
BOT
0,34.333
V
0,1.1439323425293
V
-1,0
BOT
0,34.3396666666667
V
0,1.17826461791992
V
-1,0
BOT
0,34.3463333333333
V
0,1.20973587036133
V
-1,0
BOT
0,34.353
V
0,1.23929977416992
V
-1,0
BOT
0,34.3596666666667
V
0,1.26314163208008
V
-1,0
BOT
0,34.3663333333333
V
0,1.28173828125
V
-1,0
BOT
0,34.373
V
0,1.2974739074707
V
-1,0
BOT
0,34.3796666666667
V
0,1.30939483642578
V
-1,0
BOT
0,34.3863333333333
V
0,1.31797790527344
V
-1,0
BOT
0,34.393
V
0,1.32226943969727
V
-1,0
BOT
0,34.3996666666667
V
0,1.32322311401367
V
-1,0
BOT
0,34.4063333333333
V
0,1.32131576538086
V
-1,0
BOT
0,34.413
V
0,1.31654739379883
V
-1,0
BOT
0,34.4196666666667
V
0,1.30748748779297
V
-1,0
BOT
0,34.4263333333333
V
0,1.29461288452148
V
-1,0
BOT
0,34.433
V
0,1.27935409545898
V
-1,0
BOT
0,34.4396666666667
V
0,1.26266479492187
V
-1,0
BOT
0,34.4463333333333
V
0,1.24216079711914
V
-1,0
BOT
0,34.453
V
0,1.21688842773437
V
-1,0
BOT
0,34.4596666666667
V
0,1.190185546875
V
-1,0
BOT
0,34.4663333333333
V
0,1.1591911315918
V
-1,0
BOT
0,34.473
V
0,1.12295150756836
V
-1,0
BOT
0,34.4796666666667
V
0,1.08146667480469
V
-1,0
BOT
0,34.4863333333333
V
0,1.03569030761719
V
-1,0
BOT
0,34.493
V
0,0.987052917480469
V
-1,0
BOT
0,34.4996666666667
V
0,0.934600830078125
V
-1,0
BOT
0,34.5063333333333
V
0,0.878810882568359
V
-1,0
BOT
0,34.513
V
0,0.820159912109375
V
-1,0
BOT
0,34.5196666666667
V
0,0.758171081542969
V
-1,0
BOT
0,34.5263333333333
V
0,0.693321228027344
V
-1,0
BOT
0,34.533
V
0,0.627040863037109
V
-1,0
BOT
0,34.5396666666667
V
0,0.559806823730469
V
-1,0
BOT
0,34.5463333333333
V
0,0.493526458740234
V
-1,0
BOT
0,34.553
V
0,0.42724609375
V
-1,0
BOT
0,34.5596666666667
V
0,0.360965728759766
V
-1,0
BOT
0,34.5663333333333
V
0,0.293254852294922
V
-1,0
BOT
0,34.573
V
0,0.224590301513672
V
-1,0
BOT
0,34.5796666666667
V
0,0.153064727783203
V
-1,0
BOT
0,34.5863333333333
V
0,0.0782012939453125
V
-1,0
BOT
0,34.593
V
0,0.00238418579101562
V
-1,0
BOT
0,34.5996666666667
V
0,-0.0758171081542969
V
-1,0
BOT
0,34.6063333333333
V
0,-0.155448913574219
V
-1,0
BOT
0,34.613
V
0,-0.235557556152344
V
-1,0
BOT
0,34.6196666666667
V
0,-0.314235687255859
V
-1,0
BOT
0,34.6263333333333
V
0,-0.392436981201172
V
-1,0
BOT
0,34.633
V
0,-0.471591949462891
V
-1,0
BOT
0,34.6396666666667
V
0,-0.550270080566406
V
-1,0
BOT
0,34.6463333333333
V
0,-0.626087188720703
V
-1,0
BOT
0,34.653
V
0,-0.700473785400391
V
-1,0
BOT
0,34.6596666666667
V
0,-0.776290893554688
V
-1,0
BOT
0,34.6663333333333
V
0,-0.852584838867188
V
-1,0
BOT
0,34.673
V
0,-0.930309295654297
V
-1,0
BOT
0,34.6796666666667
V
0,-1.01041793823242
V
-1,0
BOT
0,34.6863333333333
V
0,-1.09243392944336
V
-1,0
BOT
0,34.693
V
0,-1.17588043212891
V
-1,0
BOT
0,34.6996666666667
V
0,-1.25980377197266
V
-1,0
BOT
0,34.7063333333333
V
0,-1.34563446044922
V
-1,0
BOT
0,34.713
V
0,-1.43098831176758
V
-1,0
BOT
0,34.7196666666667
V
0,-1.51252746582031
V
-1,0
BOT
0,34.7263333333333
V
0,-1.59072875976562
V
-1,0
BOT
0,34.733
V
0,-1.66893005371094
V
-1,0
BOT
0,34.7396666666667
V
0,-1.74760818481445
V
-1,0
BOT
0,34.7463333333333
V
0,-1.82628631591797
V
-1,0
BOT
0,34.753
V
0,-1.90448760986328
V
-1,0
BOT
0,34.7596666666667
V
0,-1.98268890380859
V
-1,0
BOT
0,34.7663333333333
V
0,-2.06184387207031
V
-1,0
BOT
0,34.773
V
0,-2.14052200317383
V
-1,0
BOT
0,34.7796666666667
V
0,-2.21776962280273
V
-1,0
BOT
0,34.7863333333333
V
0,-2.29310989379883
V
-1,0
BOT
0,34.793
V
0,-2.36701965332031
V
-1,0
BOT
0,34.7996666666667
V
0,-2.44045257568359
V
-1,0
BOT
0,34.8063333333333
V
0,-2.51150131225586
V
-1,0
BOT
0,34.813
V
0,-2.58111953735352
V
-1,0
BOT
0,34.8196666666667
V
0,-2.64978408813477
V
-1,0
BOT
0,34.8263333333333
V
0,-2.71701812744141
V
-1,0
BOT
0,34.833
V
0,-2.78139114379883
V
-1,0
BOT
0,34.8396666666667
V
0,-2.84290313720703
V
-1,0
BOT
0,34.8463333333333
V
0,-2.90393829345703
V
-1,0
BOT
0,34.853
V
0,-2.96497344970703
V
-1,0
BOT
0,34.8596666666667
V
0,-3.02267074584961
V
-1,0
BOT
0,34.8663333333333
V
0,-3.07655334472656
V
-1,0
BOT
0,34.873
V
0,-3.13043594360352
V
-1,0
BOT
0,34.8796666666667
V
0,-3.18527221679687
V
-1,0
BOT
0,34.8863333333333
V
0,-3.23724746704102
V
-1,0
BOT
0,34.893
V
0,-3.28540802001953
V
-1,0
BOT
0,34.8996666666667
V
0,-3.33309173583984
V
-1,0
BOT
0,34.9063333333333
V
0,-3.38220596313477
V
-1,0
BOT
0,34.913
V
0,-3.43084335327148
V
-1,0
BOT
0,34.9196666666667
V
0,-3.47757339477539
V
-1,0
BOT
0,34.9263333333333
V
0,-3.52239608764648
V
-1,0
BOT
0,34.933
V
0,-3.56483459472656
V
-1,0
BOT
0,34.9396666666667
V
0,-3.60488891601562
V
-1,0
BOT
0,34.9463333333333
V
0,-3.64065170288086
V
-1,0
BOT
0,34.953
V
0,-3.67641448974609
V
-1,0
BOT
0,34.9596666666667
V
0,-3.71217727661133
V
-1,0
BOT
0,34.9663333333333
V
0,-3.74841690063477
V
-1,0
BOT
0,34.973
V
0,-3.78561019897461
V
-1,0
BOT
0,34.9796666666667
V
0,-3.82328033447266
V
-1,0
BOT
0,34.9863333333333
V
0,-3.8604736328125
V
-1,0
BOT
0,34.993
V
0,-3.89242172241211
V
-1,0
BOT
0,34.9996666666667
V
0,-3.92055511474609
V
-1,0
BOT
0,35.0063333333333
V
0,-3.94725799560547
V
-1,0
BOT
0,35.013
V
0,-3.97491455078125
V
-1,0
BOT
0,35.0196666666667
V
0,-4.00495529174805
V
-1,0
BOT
0,35.0263333333333
V
0,-4.03738021850586
V
-1,0
BOT
0,35.033
V
0,-4.06932830810547
V
-1,0
BOT
0,35.0396666666667
V
0,-4.10127639770508
V
-1,0
BOT
0,35.0463333333333
V
0,-4.12988662719727
V
-1,0
BOT
0,35.053
V
0,-4.15658950805664
V
-1,0
BOT
0,35.0596666666667
V
0,-4.1804313659668
V
-1,0
BOT
0,35.0663333333333
V
0,-4.20331954956055
V
-1,0
BOT
0,35.073
V
0,-4.2266845703125
V
-1,0
BOT
0,35.0796666666667
V
0,-4.25195693969727
V
-1,0
BOT
0,35.0863333333333
V
0,-4.27961349487305
V
-1,0
BOT
0,35.093
V
0,-4.30488586425781
V
-1,0
BOT
0,35.0996666666667
V
0,-4.32586669921875
V
-1,0
BOT
0,35.1063333333333
V
0,-4.34398651123047
V
-1,0
BOT
0,35.113
V
0,-4.36258316040039
V
-1,0
BOT
0,35.1196666666667
V
0,-4.38261032104492
V
-1,0
BOT
0,35.1263333333333
V
0,-4.40216064453125
V
-1,0
BOT
0,35.133
V
0,-4.42171096801758
V
-1,0
BOT
0,35.1396666666667
V
0,-4.44459915161133
V
-1,0
BOT
0,35.1463333333333
V
0,-4.46844100952148
V
-1,0
BOT
0,35.153
V
0,-4.49180603027344
V
-1,0
BOT
0,35.1596666666667
V
0,-4.50992584228516
V
-1,0
BOT
0,35.1663333333333
V
0,-4.52804565429688
V
-1,0
BOT
0,35.173
V
0,-4.5475959777832
V
-1,0
BOT
0,35.1796666666667
V
0,-4.56762313842773
V
-1,0
BOT
0,35.1863333333333
V
0,-4.58669662475586
V
-1,0
BOT
0,35.193
V
0,-4.60243225097656
V
-1,0
BOT
0,35.1996666666667
V
0,-4.61912155151367
V
-1,0
BOT
0,35.2063333333333
V
0,-4.63485717773438
V
-1,0
BOT
0,35.213
V
0,-4.65059280395508
V
-1,0
BOT
0,35.2196666666667
V
0,-4.66489791870117
V
-1,0
BOT
0,35.2263333333333
V
0,-4.67967987060547
V
-1,0
BOT
0,35.233
V
0,-4.69541549682617
V
-1,0
BOT
0,35.2396666666667
V
0,-4.71115112304688
V
-1,0
BOT
0,35.2463333333333
V
0,-4.72593307495117
V
-1,0
BOT
0,35.253
V
0,-4.73928451538086
V
-1,0
BOT
0,35.2596666666667
V
0,-4.75025177001953
V
-1,0
BOT
0,35.2663333333333
V
0,-4.75978851318359
V
-1,0
BOT
0,35.273
V
0,-4.77123260498047
V
-1,0
BOT
0,35.2796666666667
V
0,-4.78458404541016
V
-1,0
BOT
0,35.2863333333333
V
0,-4.79745864868164
V
-1,0
BOT
0,35.293
V
0,-4.80985641479492
V
-1,0
BOT
0,35.2996666666667
V
0,-4.82273101806641
V
-1,0
BOT
0,35.3063333333333
V
0,-4.83512878417969
V
-1,0
BOT
0,35.313
V
0,-4.84466552734375
V
-1,0
BOT
0,35.3196666666667
V
0,-4.85086441040039
V
-1,0
BOT
0,35.3263333333333
V
0,-4.85563278198242
V
-1,0
BOT
0,35.333
V
0,-4.86087799072266
V
-1,0
BOT
0,35.3396666666667
V
0,-4.86612319946289
V
-1,0
BOT
0,35.3463333333333
V
0,-4.87279891967773
V
-1,0
BOT
0,35.353
V
0,-4.88042831420898
V
-1,0
BOT
0,35.3596666666667
V
0,-4.88901138305664
V
-1,0
BOT
0,35.3663333333333
V
0,-4.8975944519043
V
-1,0
BOT
0,35.373
V
0,-4.90665435791016
V
-1,0
BOT
0,35.3796666666667
V
0,-4.91523742675781
V
-1,0
BOT
0,35.3863333333333
V
0,-4.92238998413086
V
-1,0
BOT
0,35.393
V
0,-4.92668151855469
V
-1,0
BOT
0,35.3996666666667
V
0,-4.93001937866211
V
-1,0
BOT
0,35.4063333333333
V
0,-4.93383407592773
V
-1,0
BOT
0,35.413
V
0,-4.93812561035156
V
-1,0
BOT
0,35.4196666666667
V
0,-4.94194030761719
V
-1,0
BOT
0,35.4263333333333
V
0,-4.94575500488281
V
-1,0
BOT
0,35.433
V
0,-4.94813919067383
V
-1,0
BOT
0,35.4396666666667
V
0,-4.95004653930664
V
-1,0
BOT
0,35.4463333333333
V
0,-4.95052337646484
V
-1,0
BOT
0,35.453
V
0,-4.95052337646484
V
-1,0
BOT
0,35.4596666666667
V
0,-4.95100021362305
V
-1,0
BOT
0,35.4663333333333
V
0,-4.95100021362305
V
-1,0
BOT
0,35.473
V
0,-4.95100021362305
V
-1,0
BOT
0,35.4796666666667
V
0,-4.95100021362305
V
-1,0
BOT
0,35.4863333333333
V
0,-4.95052337646484
V
-1,0
BOT
0,35.493
V
0,-4.94813919067383
V
-1,0
BOT
0,35.4996666666667
V
0,-4.94480133056641
V
-1,0
BOT
0,35.5063333333333
V
0,-4.9433708190918
V
-1,0
BOT
0,35.513
V
0,-4.9433708190918
V
-1,0
BOT
0,35.5196666666667
V
0,-4.94480133056641
V
-1,0
BOT
0,35.5263333333333
V
0,-4.94861602783203
V
-1,0
BOT
0,35.533
V
0,-4.95481491088867
V
-1,0
BOT
0,35.5396666666667
V
0,-4.96196746826172
V
-1,0
BOT
0,35.5463333333333
V
0,-4.96721267700195
V
-1,0
BOT
0,35.553
V
0,-4.97150421142578
V
-1,0
BOT
0,35.5596666666667
V
0,-4.9738883972168
V
-1,0
BOT
0,35.5663333333333
V
0,-4.974365234375
V
-1,0
BOT
0,35.573
V
0,-4.97245788574219
V
-1,0
BOT
0,35.5796666666667
V
0,-4.96959686279297
V
-1,0
BOT
0,35.5863333333333
V
0,-4.96673583984375
V
-1,0
BOT
0,35.593
V
0,-4.96578216552734
V
-1,0
BOT
0,35.5996666666667
V
0,-4.96530532836914
V
-1,0
BOT
0,35.6063333333333
V
0,-4.96435165405273
V
-1,0
BOT
0,35.613
V
0,-4.96244430541992
V
-1,0
BOT
0,35.6196666666667
V
0,-4.9586296081543
V
-1,0
BOT
0,35.6263333333333
V
0,-4.95529174804688
V
-1,0
BOT
0,35.633
V
0,-4.95290756225586
V
-1,0
BOT
0,35.6396666666667
V
0,-4.95004653930664
V
-1,0
BOT
0,35.6463333333333
V
0,-4.94670867919922
V
-1,0
BOT
0,35.653
V
0,-4.94384765625
V
-1,0
BOT
0,35.6596666666667
V
0,-4.9433708190918
V
-1,0
BOT
0,35.6663333333333
V
0,-4.94241714477539
V
-1,0
BOT
0,35.673
V
0,-4.94098663330078
V
-1,0
BOT
0,35.6796666666667
V
0,-4.93764877319336
V
-1,0
BOT
0,35.6863333333333
V
0,-4.93478775024414
V
-1,0
BOT
0,35.693
V
0,-4.93335723876953
V
-1,0
BOT
0,35.6996666666667
V
0,-4.93431091308594
V
-1,0
BOT
0,35.7063333333333
V
0,-4.93621826171875
V
-1,0
BOT
0,35.713
V
0,-4.93907928466797
V
-1,0
BOT
0,35.7196666666667
V
0,-4.9443244934082
V
-1,0
BOT
0,35.7263333333333
V
0,-4.95100021362305
V
-1,0
BOT
0,35.733
V
0,-4.95672225952148
V
-1,0
BOT
0,35.7396666666667
V
0,-4.96006011962891
V
-1,0
BOT
0,35.7463333333333
V
0,-4.96244430541992
V
-1,0
BOT
0,35.753
V
0,-4.96435165405273
V
-1,0
BOT
0,35.7596666666667
V
0,-4.96625900268555
V
-1,0
BOT
0,35.7663333333333
V
0,-4.96816635131836
V
-1,0
BOT
0,35.773
V
0,-4.96816635131836
V
-1,0
BOT
0,35.7796666666667
V
0,-4.96578216552734
V
-1,0
BOT
0,35.7863333333333
V
0,-4.96339797973633
V
-1,0
BOT
0,35.793
V
0,-4.96292114257813
V
-1,0
BOT
0,35.7996666666667
V
0,-4.96482849121094
V
-1,0
BOT
0,35.8063333333333
V
0,-4.96673583984375
V
-1,0
BOT
0,35.813
V
0,-4.96959686279297
V
-1,0
BOT
0,35.8196666666667
V
0,-4.97579574584961
V
-1,0
BOT
0,35.8263333333333
V
0,-4.98247146606445
V
-1,0
BOT
0,35.833
V
0,-4.98533248901367
V
-1,0
BOT
0,35.8396666666667
V
0,-4.98533248901367
V
-1,0
BOT
0,35.8463333333333
V
0,-4.98485565185547
V
-1,0
BOT
0,35.853
V
0,-4.98485565185547
V
-1,0
BOT
0,35.8596666666667
V
0,-4.98437881469727
V
-1,0
BOT
0,35.8663333333333
V
0,-4.98628616333008
V
-1,0
BOT
0,35.873
V
0,-4.9896240234375
V
-1,0
BOT
0,35.8796666666667
V
0,-4.99200820922852
V
-1,0
BOT
0,35.8863333333333
V
0,-4.99343872070313
V
-1,0
BOT
0,35.893
V
0,-4.99439239501953
V
-1,0
BOT
0,35.8996666666667
V
0,-4.99534606933594
V
-1,0
BOT
0,35.9063333333333
V
0,-4.99343872070313
V
-1,0
BOT
0,35.913
V
0,-4.99248504638672
V
-1,0
BOT
0,35.9196666666667
V
0,-4.99343872070313
V
-1,0
BOT
0,35.9263333333333
V
0,-4.99629974365234
V
-1,0
BOT
0,35.933
V
0,-5.00011444091797
V
-1,0
BOT
0,35.9396666666667
V
0,-5.0048828125
V
-1,0
BOT
0,35.9463333333333
V
0,-5.00917434692383
V
-1,0
BOT
0,35.953
V
0,-5.01251220703125
V
-1,0
BOT
0,35.9596666666667
V
0,-5.01298904418945
V
-1,0
BOT
0,35.9663333333333
V
0,-5.01251220703125
V
-1,0
BOT
0,35.973
V
0,-5.01203536987305
V
-1,0
BOT
0,35.9796666666667
V
0,-5.01012802124023
V
-1,0
BOT
0,35.9863333333333
V
0,-5.00822067260742
V
-1,0
BOT
0,35.993
V
0,-5.00631332397461
V
-1,0
BOT
0,35.9996666666667
V
0,-5.00392913818359
V
-1,0
BOT
0,36.0063333333333
V
0,-5.00202178955078
V
-1,0
BOT
0,36.013
V
0,-5.00011444091797
V
-1,0
BOT
0,36.0196666666667
V
0,-4.99820709228516
V
-1,0
BOT
0,36.0263333333333
V
0,-4.99486923217773
V
-1,0
BOT
0,36.033
V
0,-4.9901008605957
V
-1,0
BOT
0,36.0396666666667
V
0,-4.98628616333008
V
-1,0
BOT
0,36.0463333333333
V
0,-4.98294830322266
V
-1,0
BOT
0,36.053
V
0,-4.97817993164063
V
-1,0
BOT
0,36.0596666666667
V
0,-4.9738883972168
V
-1,0
BOT
0,36.0663333333333
V
0,-4.97055053710938
V
-1,0
BOT
0,36.073
V
0,-4.97007369995117
V
-1,0
BOT
0,36.0796666666667
V
0,-4.97055053710938
V
-1,0
BOT
0,36.0863333333333
V
0,-4.96912002563477
V
-1,0
BOT
0,36.093
V
0,-4.96721267700195
V
-1,0
BOT
0,36.0996666666667
V
0,-4.96578216552734
V
-1,0
BOT
0,36.1063333333333
V
0,-4.96339797973633
V
-1,0
BOT
0,36.113
V
0,-4.96101379394531
V
-1,0
BOT
0,36.1196666666667
V
0,-4.95815277099609
V
-1,0
BOT
0,36.1263333333333
V
0,-4.95672225952148
V
-1,0
BOT
0,36.133
V
0,-4.95386123657227
V
-1,0
BOT
0,36.1396666666667
V
0,-4.95052337646484
V
-1,0
BOT
0,36.1463333333333
V
0,-4.94480133056641
V
-1,0
BOT
0,36.153
V
0,-4.93621826171875
V
-1,0
BOT
0,36.1596666666667
V
0,-4.92572784423828
V
-1,0
BOT
0,36.1663333333333
V
0,-4.91428375244141
V
-1,0
BOT
0,36.173
V
0,-4.90331649780273
V
-1,0
BOT
0,36.1796666666667
V
0,-4.89234924316406
V
-1,0
BOT
0,36.1863333333333
V
0,-4.88376617431641
V
-1,0
BOT
0,36.193
V
0,-4.87804412841797
V
-1,0
BOT
0,36.1996666666667
V
0,-4.87327575683594
V
-1,0
BOT
0,36.2063333333333
V
0,-4.8680305480957
V
-1,0
BOT
0,36.213
V
0,-4.86278533935547
V
-1,0
BOT
0,36.2196666666667
V
0,-4.85658645629883
V
-1,0
BOT
0,36.2263333333333
V
0,-4.84943389892578
V
-1,0
BOT
0,36.233
V
0,-4.84228134155273
V
-1,0
BOT
0,36.2396666666667
V
0,-4.83560562133789
V
-1,0
BOT
0,36.2463333333333
V
0,-4.82940673828125
V
-1,0
BOT
0,36.253
V
0,-4.82416152954102
V
-1,0
BOT
0,36.2596666666667
V
0,-4.81939315795898
V
-1,0
BOT
0,36.2663333333333
V
0,-4.81605529785156
V
-1,0
BOT
0,36.273
V
0,-4.81128692626953
V
-1,0
BOT
0,36.2796666666667
V
0,-4.80508804321289
V
-1,0
BOT
0,36.2863333333333
V
0,-4.79793548583984
V
-1,0
BOT
0,36.293
V
0,-4.78935241699219
V
-1,0
BOT
0,36.2996666666667
V
0,-4.77933883666992
V
-1,0
BOT
0,36.3063333333333
V
0,-4.76551055908203
V
-1,0
BOT
0,36.313
V
0,-4.75168228149414
V
-1,0
BOT
0,36.3196666666667
V
0,-4.74166870117188
V
-1,0
BOT
0,36.3263333333333
V
0,-4.73451614379883
V
-1,0
BOT
0,36.333
V
0,-4.72879409790039
V
-1,0
BOT
0,36.3396666666667
V
0,-4.72021102905273
V
-1,0
BOT
0,36.3463333333333
V
0,-4.71162796020508
V
-1,0
BOT
0,36.353
V
0,-4.70209121704102
V
-1,0
BOT
0,36.3596666666667
V
0,-4.69017028808594
V
-1,0
BOT
0,36.3663333333333
V
0,-4.67538833618164
V
-1,0
BOT
0,36.373
V
0,-4.66060638427734
V
-1,0
BOT
0,36.3796666666667
V
0,-4.64820861816406
V
-1,0
BOT
0,36.3863333333333
V
0,-4.6381950378418
V
-1,0
BOT
0,36.393
V
0,-4.62913513183594
V
-1,0
BOT
0,36.3996666666667
V
0,-4.61912155151367
V
-1,0
BOT
0,36.4063333333333
V
0,-4.60910797119141
V
-1,0
BOT
0,36.413
V
0,-4.59814071655273
V
-1,0
BOT
0,36.4196666666667
V
0,-4.58669662475586
V
-1,0
BOT
0,36.4263333333333
V
0,-4.57525253295898
V
-1,0
BOT
0,36.433
V
0,-4.56333160400391
V
-1,0
BOT
0,36.4396666666667
V
0,-4.55045700073242
V
-1,0
BOT
0,36.4463333333333
V
0,-4.53662872314453
V
-1,0
BOT
0,36.453
V
0,-4.52470779418945
V
-1,0
BOT
0,36.4596666666667
V
0,-4.51183319091797
V
-1,0
BOT
0,36.4663333333333
V
0,-4.49800491333008
V
-1,0
BOT
0,36.473
V
0,-4.48369979858398
V
-1,0
BOT
0,36.4796666666667
V
0,-4.4713020324707
V
-1,0
BOT
0,36.4863333333333
V
0,-4.46081161499023
V
-1,0
BOT
0,36.493
V
0,-4.45032119750977
V
-1,0
BOT
0,36.4996666666667
V
0,-4.44173812866211
V
-1,0
BOT
0,36.5063333333333
V
0,-4.43363189697266
V
-1,0
BOT
0,36.513
V
0,-4.42886352539063
V
-1,0
BOT
0,36.5196666666667
V
0,-4.42409515380859
V
-1,0
BOT
0,36.5263333333333
V
0,-4.42075729370117
V
-1,0
BOT
0,36.533
V
0,-4.41789627075195
V
-1,0
BOT
0,36.5396666666667
V
0,-4.41551208496094
V
-1,0
BOT
0,36.5463333333333
V
0,-4.41360473632813
V
-1,0
BOT
0,36.553
V
0,-4.41169738769531
V
-1,0
BOT
0,36.5596666666667
V
0,-4.41122055053711
V
-1,0
BOT
0,36.5663333333333
V
0,-4.41265106201172
V
-1,0
BOT
0,36.573
V
0,-4.41598892211914
V
-1,0
BOT
0,36.5796666666667
V
0,-4.41980361938477
V
-1,0
BOT
0,36.5863333333333
V
0,-4.425048828125
V
-1,0
BOT
0,36.593
V
0,-4.43029403686523
V
-1,0
BOT
0,36.5996666666667
V
0,-4.43601608276367
V
-1,0
BOT
0,36.6063333333333
V
0,-4.43887710571289
V
-1,0
BOT
0,36.613
V
0,-4.4403076171875
V
-1,0
BOT
0,36.6196666666667
V
0,-4.44364547729492
V
-1,0
BOT
0,36.6263333333333
V
0,-4.44650650024414
V
-1,0
BOT
0,36.633
V
0,-4.44984436035156
V
-1,0
BOT
0,36.6396666666667
V
0,-4.45270538330078
V
-1,0
BOT
0,36.6463333333333
V
0,-4.45795059204102
V
-1,0
BOT
0,36.653
V
0,-4.46557998657227
V
-1,0
BOT
0,36.6596666666667
V
0,-4.4713020324707
V
-1,0
BOT
0,36.6663333333333
V
0,-4.47607040405273
V
-1,0
BOT
0,36.673
V
0,-4.48179244995117
V
-1,0
BOT
0,36.6796666666667
V
0,-4.48894500732422
V
-1,0
BOT
0,36.6863333333333
V
0,-4.49657440185547
V
-1,0
BOT
0,36.693
V
0,-4.50325012207031
V
-1,0
BOT
0,36.6996666666667
V
0,-4.50992584228516
V
-1,0
BOT
0,36.7063333333333
V
0,-4.5170783996582
V
-1,0
BOT
0,36.713
V
0,-4.52327728271484
V
-1,0
BOT
0,36.7196666666667
V
0,-4.52661514282227
V
-1,0
BOT
0,36.7263333333333
V
0,-4.52709197998047
V
-1,0
BOT
0,36.733
V
0,-4.52852249145508
V
-1,0
BOT
0,36.7396666666667
V
0,-4.53329086303711
V
-1,0
BOT
0,36.7463333333333
V
0,-4.54092025756836
V
-1,0
BOT
0,36.753
V
0,-4.54998016357422
V
-1,0
BOT
0,36.7596666666667
V
0,-4.56094741821289
V
-1,0
BOT
0,36.7663333333333
V
0,-4.57429885864258
V
-1,0
BOT
0,36.773
V
0,-4.58812713623047
V
-1,0
BOT
0,36.7796666666667
V
0,-4.60052490234375
V
-1,0
BOT
0,36.7863333333333
V
0,-4.61149215698242
V
-1,0
BOT
0,36.793
V
0,-4.6234130859375
V
-1,0
BOT
0,36.7996666666667
V
0,-4.63533401489258
V
-1,0
BOT
0,36.8063333333333
V
0,-4.64439392089844
V
-1,0
BOT
0,36.813
V
0,-4.65106964111328
V
-1,0
BOT
0,36.8196666666667
V
0,-4.65869903564453
V
-1,0
BOT
0,36.8263333333333
V
0,-4.6687126159668
V
-1,0
BOT
0,36.833
V
0,-4.67920303344727
V
-1,0
BOT
0,36.8396666666667
V
0,-4.69064712524414
V
-1,0
BOT
0,36.8463333333333
V
0,-4.70447540283203
V
-1,0
BOT
0,36.853
V
0,-4.72164154052734
V
-1,0
BOT
0,36.8596666666667
V
0,-4.73976135253906
V
-1,0
BOT
0,36.8663333333333
V
0,-4.75549697875977
V
-1,0
BOT
0,36.873
V
0,-4.76837158203125
V
-1,0
BOT
0,36.8796666666667
V
0,-4.78076934814453
V
-1,0
BOT
0,36.8863333333333
V
0,-4.79555130004883
V
-1,0
BOT
0,36.893
V
0,-4.81224060058594
V
-1,0
BOT
0,36.8996666666667
V
0,-4.82702255249023
V
-1,0
BOT
0,36.9063333333333
V
0,-4.83942031860352
V
-1,0
BOT
0,36.913
V
0,-4.852294921875
V
-1,0
BOT
0,36.9196666666667
V
0,-4.8680305480957
V
-1,0
BOT
0,36.9263333333333
V
0,-4.8832893371582
V
-1,0
BOT
0,36.933
V
0,-4.89568710327148
V
-1,0
BOT
0,36.9396666666667
V
0,-4.90570068359375
V
-1,0
BOT
0,36.9463333333333
V
0,-4.91619110107422
V
-1,0
BOT
0,36.953
V
0,-4.9281120300293
V
-1,0
BOT
0,36.9596666666667
V
0,-4.93907928466797
V
-1,0
BOT
0,36.9663333333333
V
0,-4.94909286499023
V
-1,0
BOT
0,36.973
V
0,-4.9595832824707
V
-1,0
BOT
0,36.9796666666667
V
0,-4.97198104858398
V
-1,0
BOT
0,36.9863333333333
V
0,-4.98580932617188
V
-1,0
BOT
0,36.993
V
0,-4.99868392944336
V
-1,0
BOT
0,36.9996666666667
V
0,-5.01060485839844
V
-1,0
BOT
0,37.0063333333333
V
0,-5.02157211303711
V
-1,0
BOT
0,37.013
V
0,-5.03253936767578
V
-1,0
BOT
0,37.0196666666667
V
0,-5.04255294799805
V
-1,0
BOT
0,37.0263333333333
V
0,-5.05208969116211
V
-1,0
BOT
0,37.033
V
0,-5.06114959716797
V
-1,0
BOT
0,37.0396666666667
V
0,-5.06925582885742
V
-1,0
BOT
0,37.0463333333333
V
0,-5.07640838623047
V
-1,0
BOT
0,37.053
V
0,-5.08499145507813
V
-1,0
BOT
0,37.0596666666667
V
0,-5.09357452392578
V
-1,0
BOT
0,37.0663333333333
V
0,-5.10215759277344
V
-1,0
BOT
0,37.073
V
0,-5.11026382446289
V
-1,0
BOT
0,37.0796666666667
V
0,-5.11837005615234
V
-1,0
BOT
0,37.0863333333333
V
0,-5.12599945068359
V
-1,0
BOT
0,37.093
V
0,-5.13267517089844
V
-1,0
BOT
0,37.0996666666667
V
0,-5.13935089111328
V
-1,0
BOT
0,37.1063333333333
V
0,-5.14602661132813
V
-1,0
BOT
0,37.113
V
0,-5.15222549438477
V
-1,0
BOT
0,37.1196666666667
V
0,-5.157470703125
V
-1,0
BOT
0,37.1263333333333
V
0,-5.16128540039063
V
-1,0
BOT
0,37.133
V
0,-5.16271591186523
V
-1,0
BOT
0,37.1396666666667
V
0,-5.16080856323242
V
-1,0
BOT
0,37.1463333333333
V
0,-5.157470703125
V
-1,0
BOT
0,37.153
V
0,-5.15460968017578
V
-1,0
BOT
0,37.1596666666667
V
0,-5.15031814575195
V
-1,0
BOT
0,37.1663333333333
V
0,-5.14554977416992
V
-1,0
BOT
0,37.173
V
0,-5.1422119140625
V
-1,0
BOT
0,37.1796666666667
V
0,-5.1426887512207
V
-1,0
BOT
0,37.1863333333333
V
0,-5.14411926269531
V
-1,0
BOT
0,37.193
V
0,-5.14411926269531
V
-1,0
BOT
0,37.1996666666667
V
0,-5.14125823974609
V
-1,0
BOT
0,37.2063333333333
V
0,-5.13935089111328
V
-1,0
BOT
0,37.213
V
0,-5.13648986816406
V
-1,0
BOT
0,37.2196666666667
V
0,-5.12981414794922
V
-1,0
BOT
0,37.2263333333333
V
0,-5.12027740478516
V
-1,0
BOT
0,37.233
V
0,-5.10978698730469
V
-1,0
BOT
0,37.2396666666667
V
0,-5.09929656982422
V
-1,0
BOT
0,37.2463333333333
V
0,-5.08737564086914
V
-1,0
BOT
0,37.253
V
0,-5.07450103759766
V
-1,0
BOT
0,37.2596666666667
V
0,-5.05971908569336
V
-1,0
BOT
0,37.2663333333333
V
0,-5.04732131958008
V
-1,0
BOT
0,37.273
V
0,-5.03635406494141
V
-1,0
BOT
0,37.2796666666667
V
0,-5.02538681030273
V
-1,0
BOT
0,37.2863333333333
V
0,-5.01203536987305
V
-1,0
BOT
0,37.293
V
0,-4.99916076660156
V
-1,0
BOT
0,37.2996666666667
V
0,-4.98867034912109
V
-1,0
BOT
0,37.3063333333333
V
0,-4.98056411743164
V
-1,0
BOT
0,37.313
V
0,-4.97293472290039
V
-1,0
BOT
0,37.3196666666667
V
0,-4.96578216552734
V
-1,0
BOT
0,37.3263333333333
V
0,-4.96101379394531
V
-1,0
BOT
0,37.333
V
0,-4.95529174804688
V
-1,0
BOT
0,37.3396666666667
V
0,-4.94575500488281
V
-1,0
BOT
0,37.3463333333333
V
0,-4.93288040161133
V
-1,0
BOT
0,37.353
V
0,-4.91905212402344
V
-1,0
BOT
0,37.3596666666667
V
0,-4.90474700927734
V
-1,0
BOT
0,37.3663333333333
V
0,-4.88901138305664
V
-1,0
BOT
0,37.373
V
0,-4.87470626831055
V
-1,0
BOT
0,37.3796666666667
V
0,-4.86278533935547
V
-1,0
BOT
0,37.3863333333333
V
0,-4.852294921875
V
-1,0
BOT
0,37.393
V
0,-4.84132766723633
V
-1,0
BOT
0,37.3996666666667
V
0,-4.82892990112305
V
-1,0
BOT
0,37.4063333333333
V
0,-4.81605529785156
V
-1,0
BOT
0,37.413
V
0,-4.80175018310547
V
-1,0
BOT
0,37.4196666666667
V
0,-4.78601455688477
V
-1,0
BOT
0,37.4263333333333
V
0,-4.76884841918945
V
-1,0
BOT
0,37.433
V
0,-4.75358963012695
V
-1,0
BOT
0,37.4396666666667
V
0,-4.74214553833008
V
-1,0
BOT
0,37.4463333333333
V
0,-4.73260879516602
V
-1,0
BOT
0,37.453
V
0,-4.72402572631836
V
-1,0
BOT
0,37.4596666666667
V
0,-4.71687316894531
V
-1,0
BOT
0,37.4663333333333
V
0,-4.70876693725586
V
-1,0
BOT
0,37.473
V
0,-4.69779968261719
V
-1,0
BOT
0,37.4796666666667
V
0,-4.6844482421875
V
-1,0
BOT
0,37.4863333333333
V
0,-4.67300415039063
V
-1,0
BOT
0,37.493
V
0,-4.66299057006836
V
-1,0
BOT
0,37.4996666666667
V
0,-4.65297698974609
V
-1,0
BOT
0,37.5063333333333
V
0,-4.64534759521484
V
-1,0
BOT
0,37.513
V
0,-4.64200973510742
V
-1,0
BOT
0,37.5196666666667
V
0,-4.64057922363281
V
-1,0
BOT
0,37.5263333333333
V
0,-4.63676452636719
V
-1,0
BOT
0,37.533
V
0,-4.63056564331055
V
-1,0
BOT
0,37.5396666666667
V
0,-4.62436676025391
V
-1,0
BOT
0,37.5463333333333
V
0,-4.61912155151367
V
-1,0
BOT
0,37.553
V
0,-4.61292266845703
V
-1,0
BOT
0,37.5596666666667
V
0,-4.60481643676758
V
-1,0
BOT
0,37.5663333333333
V
0,-4.59814071655273
V
-1,0
BOT
0,37.573
V
0,-4.59527969360352
V
-1,0
BOT
0,37.5796666666667
V
0,-4.5928955078125
V
-1,0
BOT
0,37.5863333333333
V
0,-4.58908081054688
V
-1,0
BOT
0,37.593
V
0,-4.58669662475586
V
-1,0
BOT
0,37.5996666666667
V
0,-4.58717346191406
V
-1,0
BOT
0,37.6063333333333
V
0,-4.58860397338867
V
-1,0
BOT
0,37.613
V
0,-4.58526611328125
V
-1,0
BOT
0,37.6196666666667
V
0,-4.58002090454102
V
-1,0
BOT
0,37.6263333333333
V
0,-4.57668304443359
V
-1,0
BOT
0,37.633
V
0,-4.57382202148438
V
-1,0
BOT
0,37.6396666666667
V
0,-4.57000732421875
V
-1,0
BOT
0,37.6463333333333
V
0,-4.56571578979492
V
-1,0
BOT
0,37.653
V
0,-4.56428527832031
V
-1,0
BOT
0,37.6596666666667
V
0,-4.56523895263672
V
-1,0
BOT
0,37.6663333333333
V
0,-4.56380844116211
V
-1,0
BOT
0,37.673
V
0,-4.55760955810547
V
-1,0
BOT
0,37.6796666666667
V
0,-4.5475959777832
V
-1,0
BOT
0,37.6863333333333
V
0,-4.53472137451172
V
-1,0
BOT
0,37.693
V
0,-4.51993942260742
V
-1,0
BOT
0,37.6996666666667
V
0,-4.50277328491211
V
-1,0
BOT
0,37.7063333333333
V
0,-4.48703765869141
V
-1,0
BOT
0,37.713
V
0,-4.47416305541992
V
-1,0
BOT
0,37.7196666666667
V
0,-4.46224212646484
V
-1,0
BOT
0,37.7263333333333
V
0,-4.45127487182617
V
-1,0
BOT
0,37.733
V
0,-4.4407844543457
V
-1,0
BOT
0,37.7396666666667
V
0,-4.43172454833984
V
-1,0
BOT
0,37.7463333333333
V
0,-4.42361831665039
V
-1,0
BOT
0,37.753
V
0,-4.41503524780273
V
-1,0
BOT
0,37.7596666666667
V
0,-4.40502166748047
V
-1,0
BOT
0,37.7663333333333
V
0,-4.3940544128418
V
-1,0
BOT
0,37.773
V
0,-4.38117980957031
V
-1,0
BOT
0,37.7796666666667
V
0,-4.36639785766602
V
-1,0
BOT
0,37.7863333333333
V
0,-4.34970855712891
V
-1,0
BOT
0,37.793
V
0,-4.3330192565918
V
-1,0
BOT
0,37.7996666666667
V
0,-4.31632995605469
V
-1,0
BOT
0,37.8063333333333
V
0,-4.302978515625
V
-1,0
BOT
0,37.813
V
0,-4.29201126098633
V
-1,0
BOT
0,37.8196666666667
V
0,-4.28056716918945
V
-1,0
BOT
0,37.8263333333333
V
0,-4.26769256591797
V
-1,0
BOT
0,37.833
V
0,-4.25386428833008
V
-1,0
BOT
0,37.8396666666667
V
0,-4.23908233642578
V
-1,0
BOT
0,37.8463333333333
V
0,-4.22382354736328
V
-1,0
BOT
0,37.853
V
0,-4.20665740966797
V
-1,0
BOT
0,37.8596666666667
V
0,-4.18901443481445
V
-1,0
BOT
0,37.8663333333333
V
0,-4.17327880859375
V
-1,0
BOT
0,37.873
V
0,-4.15897369384766
V
-1,0
BOT
0,37.8796666666667
V
0,-4.14562225341797
V
-1,0
BOT
0,37.8863333333333
V
0,-4.12988662719727
V
-1,0
BOT
0,37.893
V
0,-4.11415100097656
V
-1,0
BOT
0,37.8996666666667
V
0,-4.10079956054688
V
-1,0
BOT
0,37.9063333333333
V
0,-4.0888786315918
V
-1,0
BOT
0,37.913
V
0,-4.07552719116211
V
-1,0
BOT
0,37.9196666666667
V
0,-4.06074523925781
V
-1,0
BOT
0,37.9263333333333
V
0,-4.04691696166992
V
-1,0
BOT
0,37.933
V
0,-4.03499603271484
V
-1,0
BOT
0,37.9396666666667
V
0,-4.02307510375977
V
-1,0
BOT
0,37.9463333333333
V
0,-4.01020050048828
V
-1,0
BOT
0,37.953
V
0,-3.99637222290039
V
-1,0
BOT
0,37.9596666666667
V
0,-3.98445129394531
V
-1,0
BOT
0,37.9663333333333
V
0,-3.97491455078125
V
-1,0
BOT
0,37.973
V
0,-3.96537780761719
V
-1,0
BOT
0,37.9796666666667
V
0,-3.95441055297852
V
-1,0
BOT
0,37.9863333333333
V
0,-3.94105911254883
V
-1,0
BOT
0,37.993
V
0,-3.92770767211914
V
-1,0
BOT
0,37.9996666666667
V
0,-3.91435623168945
V
-1,0
BOT
0,38.0063333333333
V
0,-3.90148162841797
V
-1,0
BOT
0,38.013
V
0,-3.8909912109375
V
-1,0
BOT
0,38.0196666666667
V
0,-3.88145446777344
V
-1,0
BOT
0,38.0263333333333
V
0,-3.87477874755859
V
-1,0
BOT
0,38.033
V
0,-3.86857986450195
V
-1,0
BOT
0,38.0396666666667
V
0,-3.86238098144531
V
-1,0
BOT
0,38.0463333333333
V
0,-3.85332107543945
V
-1,0
BOT
0,38.053
V
0,-3.84140014648437
V
-1,0
BOT
0,38.0596666666667
V
0,-3.8304328918457
V
-1,0
BOT
0,38.0663333333333
V
0,-3.82137298583984
V
-1,0
BOT
0,38.073
V
0,-3.8142204284668
V
-1,0
BOT
0,38.0796666666667
V
0,-3.80754470825195
V
-1,0
BOT
0,38.0863333333333
V
0,-3.80086898803711
V
-1,0
BOT
0,38.093
V
0,-3.79371643066406
V
-1,0
BOT
0,38.0996666666667
V
0,-3.7841796875
V
-1,0
BOT
0,38.1063333333333
V
0,-3.77273559570312
V
-1,0
BOT
0,38.113
V
0,-3.76129150390625
V
-1,0
BOT
0,38.1196666666667
V
0,-3.7531852722168
V
-1,0
BOT
0,38.1263333333333
V
0,-3.74841690063477
V
-1,0
BOT
0,38.133
V
0,-3.74698638916016
V
-1,0
BOT
0,38.1396666666667
V
0,-3.74889373779297
V
-1,0
BOT
0,38.1463333333333
V
0,-3.75270843505859
V
-1,0
BOT
0,38.153
V
0,-3.75747680664062
V
-1,0
BOT
0,38.1596666666667
V
0,-3.76176834106445
V
-1,0
BOT
0,38.1663333333333
V
0,-3.76558303833008
V
-1,0
BOT
0,38.173
V
0,-3.76749038696289
V
-1,0
BOT
0,38.1796666666667
V
0,-3.76796722412109
V
-1,0
BOT
0,38.1863333333333
V
0,-3.76796722412109
V
-1,0
BOT
0,38.193
V
0,-3.76796722412109
V
-1,0
BOT
0,38.1996666666667
V
0,-3.76796722412109
V
-1,0
BOT
0,38.2063333333333
V
0,-3.76987457275391
V
-1,0
BOT
0,38.213
V
0,-3.77511978149414
V
-1,0
BOT
0,38.2196666666667
V
0,-3.78322601318359
V
-1,0
BOT
0,38.2263333333333
V
0,-3.79037857055664
V
-1,0
BOT
0,38.233
V
0,-3.79562377929687
V
-1,0
BOT
0,38.2396666666667
V
0,-3.80182266235352
V
-1,0
BOT
0,38.2463333333333
V
0,-3.80802154541016
V
-1,0
BOT
0,38.253
V
0,-3.814697265625
V
-1,0
BOT
0,38.2596666666667
V
0,-3.82137298583984
V
-1,0
BOT
0,38.2663333333333
V
0,-3.8294792175293
V
-1,0
BOT
0,38.273
V
0,-3.83901596069336
V
-1,0
BOT
0,38.2796666666667
V
0,-3.84950637817383
V
-1,0
BOT
0,38.2863333333333
V
0,-3.85904312133789
V
-1,0
BOT
0,38.293
V
0,-3.86524200439453
V
-1,0
BOT
0,38.2996666666667
V
0,-3.86857986450195
V
-1,0
BOT
0,38.3063333333333
V
0,-3.87096405029297
V
-1,0
BOT
0,38.313
V
0,-3.87382507324219
V
-1,0
BOT
0,38.3196666666667
V
0,-3.87907028198242
V
-1,0
BOT
0,38.3263333333333
V
0,-3.88526916503906
V
-1,0
BOT
0,38.333
V
0,-3.8914680480957
V
-1,0
BOT
0,38.3396666666667
V
0,-3.89671325683594
V
-1,0
BOT
0,38.3463333333333
V
0,-3.90148162841797
V
-1,0
BOT
0,38.353
V
0,-3.90481948852539
V
-1,0
BOT
0,38.3596666666667
V
0,-3.90529632568359
V
-1,0
BOT
0,38.3663333333333
V
0,-3.90481948852539
V
-1,0
BOT
0,38.373
V
0,-3.90529632568359
V
-1,0
BOT
0,38.3796666666667
V
0,-3.90911102294922
V
-1,0
BOT
0,38.3863333333333
V
0,-3.91578674316406
V
-1,0
BOT
0,38.393
V
0,-3.92532348632812
V
-1,0
BOT
0,38.3996666666667
V
0,-3.93867492675781
V
-1,0
BOT
0,38.4063333333333
V
0,-3.95298004150391
V
-1,0
BOT
0,38.413
V
0,-3.96728515625
V
-1,0
BOT
0,38.4196666666667
V
0,-3.98063659667969
V
-1,0
BOT
0,38.4263333333333
V
0,-3.99541854858398
V
-1,0
BOT
0,38.433
V
0,-4.00829315185547
V
-1,0
BOT
0,38.4396666666667
V
0,-4.01973724365234
V
-1,0
BOT
0,38.4463333333333
V
0,-4.03118133544922
V
-1,0
BOT
0,38.453
V
0,-4.0435791015625
V
-1,0
BOT
0,38.4596666666667
V
0,-4.05645370483398
V
-1,0
BOT
0,38.4663333333333
V
0,-4.06789779663086
V
-1,0
BOT
0,38.473
V
0,-4.07838821411133
V
-1,0
BOT
0,38.4796666666667
V
0,-4.08935546875
V
-1,0
BOT
0,38.4863333333333
V
0,-4.10127639770508
V
-1,0
BOT
0,38.493
V
0,-4.11415100097656
V
-1,0
BOT
0,38.4996666666667
V
0,-4.13036346435547
V
-1,0
BOT
0,38.5063333333333
V
0,-4.1499137878418
V
-1,0
BOT
0,38.513
V
0,-4.16994094848633
V
-1,0
BOT
0,38.5196666666667
V
0,-4.18758392333984
V
-1,0
BOT
0,38.5263333333333
V
0,-4.20331954956055
V
-1,0
BOT
0,38.533
V
0,-4.21667098999023
V
-1,0
BOT
0,38.5396666666667
V
0,-4.22906875610352
V
-1,0
BOT
0,38.5463333333333
V
0,-4.24051284790039
V
-1,0
BOT
0,38.553
V
0,-4.25052642822266
V
-1,0
BOT
0,38.5596666666667
V
0,-4.26101684570313
V
-1,0
BOT
0,38.5663333333333
V
0,-4.2719841003418
V
-1,0
BOT
0,38.573
V
0,-4.28390502929688
V
-1,0
BOT
0,38.5796666666667
V
0,-4.29487228393555
V
-1,0
BOT
0,38.5863333333333
V
0,-4.30440902709961
V
-1,0
BOT
0,38.593
V
0,-4.31299209594727
V
-1,0
BOT
0,38.5996666666667
V
0,-4.32252883911133
V
-1,0
BOT
0,38.6063333333333
V
0,-4.33254241943359
V
-1,0
BOT
0,38.613
V
0,-4.34303283691406
V
-1,0
BOT
0,38.6196666666667
V
0,-4.35447692871094
V
-1,0
BOT
0,38.6263333333333
V
0,-4.36544418334961
V
-1,0
BOT
0,38.633
V
0,-4.37402725219727
V
-1,0
BOT
0,38.6396666666667
V
0,-4.38070297241211
V
-1,0
BOT
0,38.6463333333333
V
0,-4.38547134399414
V
-1,0
BOT
0,38.653
V
0,-4.39023971557617
V
-1,0
BOT
0,38.6596666666667
V
0,-4.3940544128418
V
-1,0
BOT
0,38.6663333333333
V
0,-4.39786911010742
V
-1,0
BOT
0,38.673
V
0,-4.40454483032227
V
-1,0
BOT
0,38.6796666666667
V
0,-4.41408157348633
V
-1,0
BOT
0,38.6863333333333
V
0,-4.42743301391602
V
-1,0
BOT
0,38.693
V
0,-4.43935394287109
V
-1,0
BOT
0,38.6996666666667
V
0,-4.44889068603516
V
-1,0
BOT
0,38.7063333333333
V
0,-4.45747375488281
V
-1,0
BOT
0,38.713
V
0,-4.46605682373047
V
-1,0
BOT
0,38.7196666666667
V
0,-4.47559356689453
V
-1,0
BOT
0,38.7263333333333
V
0,-4.48417663574219
V
-1,0
BOT
0,38.733
V
0,-4.49371337890625
V
-1,0
BOT
0,38.7396666666667
V
0,-4.50468063354492
V
-1,0
BOT
0,38.7463333333333
V
0,-4.5161247253418
V
-1,0
BOT
0,38.753
V
0,-4.52709197998047
V
-1,0
BOT
0,38.7596666666667
V
0,-4.53901290893555
V
-1,0
BOT
0,38.7663333333333
V
0,-4.55141067504883
V
-1,0
BOT
0,38.773
V
0,-4.56380844116211
V
-1,0
BOT
0,38.7796666666667
V
0,-4.57525253295898
V
-1,0
BOT
0,38.7863333333333
V
0,-4.58765029907227
V
-1,0
BOT
0,38.793
V
0,-4.60243225097656
V
-1,0
BOT
0,38.7996666666667
V
0,-4.61769104003906
V
-1,0
BOT
0,38.8063333333333
V
0,-4.63008880615234
V
-1,0
BOT
0,38.813
V
0,-4.64010238647461
V
-1,0
BOT
0,38.8196666666667
V
0,-4.65106964111328
V
-1,0
BOT
0,38.8263333333333
V
0,-4.66251373291016
V
-1,0
BOT
0,38.833
V
0,-4.67395782470703
V
-1,0
BOT
0,38.8396666666667
V
0,-4.68635559082031
V
-1,0
BOT
0,38.8463333333333
V
0,-4.70209121704102
V
-1,0
BOT
0,38.853
V
0,-4.72068786621094
V
-1,0
BOT
0,38.8596666666667
V
0,-4.74071502685547
V
-1,0
BOT
0,38.8663333333333
V
0,-4.75978851318359
V
-1,0
BOT
0,38.873
V
0,-4.77790832519531
V
-1,0
BOT
0,38.8796666666667
V
0,-4.79316711425781
V
-1,0
BOT
0,38.8863333333333
V
0,-4.80890274047852
V
-1,0
BOT
0,38.893
V
0,-4.82606887817383
V
-1,0
BOT
0,38.8996666666667
V
0,-4.84275817871094
V
-1,0
BOT
0,38.9063333333333
V
0,-4.85849380493164
V
-1,0
BOT
0,38.913
V
0,-4.87375259399414
V
-1,0
BOT
0,38.9196666666667
V
0,-4.89091873168945
V
-1,0
BOT
0,38.9263333333333
V
0,-4.90808486938477
V
-1,0
BOT
0,38.933
V
0,-4.92429733276367
V
-1,0
BOT
0,38.9396666666667
V
0,-4.94241714477539
V
-1,0
BOT
0,38.9463333333333
V
0,-4.96149063110352
V
-1,0
BOT
0,38.953
V
0,-4.98008728027344
V
-1,0
BOT
0,38.9596666666667
V
0,-4.99677658081055
V
-1,0
BOT
0,38.9663333333333
V
0,-5.01251220703125
V
-1,0
BOT
0,38.973
V
0,-5.02634048461914
V
-1,0
BOT
0,38.9796666666667
V
0,-5.03730773925781
V
-1,0
BOT
0,38.9863333333333
V
0,-5.04732131958008
V
-1,0
BOT
0,38.993
V
0,-5.05590438842773
V
-1,0
BOT
0,38.9996666666667
V
0,-5.06401062011719
V
-1,0
BOT
0,39.0063333333333
V
0,-5.07545471191406
V
-1,0
BOT
0,39.013
V
0,-5.09119033813477
V
-1,0
BOT
0,39.0196666666667
V
0,-5.10740280151367
V
-1,0
BOT
0,39.0263333333333
V
0,-5.12361526489258
V
-1,0
BOT
0,39.033
V
0,-5.1417350769043
V
-1,0
BOT
0,39.0396666666667
V
0,-5.16128540039063
V
-1,0
BOT
0,39.0463333333333
V
0,-5.17749786376953
V
-1,0
BOT
0,39.053
V
0,-5.1884651184082
V
-1,0
BOT
0,39.0596666666667
V
0,-5.20038604736328
V
-1,0
BOT
0,39.0663333333333
V
0,-5.21564483642578
V
-1,0
BOT
0,39.073
V
0,-5.22851943969727
V
-1,0
BOT
0,39.0796666666667
V
0,-5.23853302001953
V
-1,0
BOT
0,39.0863333333333
V
0,-5.24616241455078
V
-1,0
BOT
0,39.093
V
0,-5.25474548339844
V
-1,0
BOT
0,39.0996666666667
V
0,-5.26046752929688
V
-1,0
BOT
0,39.1063333333333
V
0,-5.26285171508789
V
-1,0
BOT
0,39.113
V
0,-5.26714324951172
V
-1,0
BOT
0,39.1196666666667
V
0,-5.27572631835938
V
-1,0
BOT
0,39.1263333333333
V
0,-5.28669357299805
V
-1,0
BOT
0,39.133
V
0,-5.29670715332031
V
-1,0
BOT
0,39.1396666666667
V
0,-5.30624389648438
V
-1,0
BOT
0,39.1463333333333
V
0,-5.31721115112305
V
-1,0
BOT
0,39.153
V
0,-5.32817840576172
V
-1,0
BOT
0,39.1596666666667
V
0,-5.33676147460938
V
-1,0
BOT
0,39.1663333333333
V
0,-5.34534454345703
V
-1,0
BOT
0,39.173
V
0,-5.35678863525391
V
-1,0
BOT
0,39.1796666666667
V
0,-5.37109375
V
-1,0
BOT
0,39.1863333333333
V
0,-5.38396835327148
V
-1,0
BOT
0,39.193
V
0,-5.39493560791016
V
-1,0
BOT
0,39.1996666666667
V
0,-5.40399551391602
V
-1,0
BOT
0,39.2063333333333
V
0,-5.41210174560547
V
-1,0
BOT
0,39.213
V
0,-5.4173469543457
V
-1,0
BOT
0,39.2196666666667
V
0,-5.42163848876953
V
-1,0
BOT
0,39.2263333333333
V
0,-5.42783737182617
V
-1,0
BOT
0,39.233
V
0,-5.43546676635742
V
-1,0
BOT
0,39.2396666666667
V
0,-5.44404983520508
V
-1,0
BOT
0,39.2463333333333
V
0,-5.45167922973633
V
-1,0
BOT
0,39.253
V
0,-5.45835494995117
V
-1,0
BOT
0,39.2596666666667
V
0,-5.4631233215332
V
-1,0
BOT
0,39.2663333333333
V
0,-5.46550750732422
V
-1,0
BOT
0,39.273
V
0,-5.46550750732422
V
-1,0
BOT
0,39.2796666666667
V
0,-5.46503067016602
V
-1,0
BOT
0,39.2863333333333
V
0,-5.46455383300781
V
-1,0
BOT
0,39.293
V
0,-5.46598434448242
V
-1,0
BOT
0,39.2996666666667
V
0,-5.46741485595703
V
-1,0
BOT
0,39.3063333333333
V
0,-5.46932220458984
V
-1,0
BOT
0,39.313
V
0,-5.47170639038086
V
-1,0
BOT
0,39.3196666666667
V
0,-5.47409057617188
V
-1,0
BOT
0,39.3263333333333
V
0,-5.47456741333008
V
-1,0
BOT
0,39.333
V
0,-5.47313690185547
V
-1,0
BOT
0,39.3396666666667
V
0,-5.47313690185547
V
-1,0
BOT
0,39.3463333333333
V
0,-5.47409057617188
V
-1,0
BOT
0,39.353
V
0,-5.47504425048828
V
-1,0
BOT
0,39.3596666666667
V
0,-5.47599792480469
V
-1,0
BOT
0,39.3663333333333
V
0,-5.4783821105957
V
-1,0
BOT
0,39.373
V
0,-5.48124313354492
V
-1,0
BOT
0,39.3796666666667
V
0,-5.48219680786133
V
-1,0
BOT
0,39.3863333333333
V
0,-5.48028945922852
V
-1,0
BOT
0,39.393
V
0,-5.47695159912109
V
-1,0
BOT
0,39.3996666666667
V
0,-5.47456741333008
V
-1,0
BOT
0,39.4063333333333
V
0,-5.47266006469727
V
-1,0
BOT
0,39.413
V
0,-5.46979904174805
V
-1,0
BOT
0,39.4196666666667
V
0,-5.46550750732422
V
-1,0
BOT
0,39.4263333333333
V
0,-5.46121597290039
V
-1,0
BOT
0,39.433
V
0,-5.45883178710938
V
-1,0
BOT
0,39.4396666666667
V
0,-5.45883178710938
V
-1,0
BOT
0,39.4463333333333
V
0,-5.45883178710938
V
-1,0
BOT
0,39.453
V
0,-5.45787811279297
V
-1,0
BOT
0,39.4596666666667
V
0,-5.45930862426758
V
-1,0
BOT
0,39.4663333333333
V
0,-5.46360015869141
V
-1,0
BOT
0,39.473
V
0,-5.46789169311523
V
-1,0
BOT
0,39.4796666666667
V
0,-5.46979904174805
V
-1,0
BOT
0,39.4863333333333
V
0,-5.47122955322266
V
-1,0
BOT
0,39.493
V
0,-5.47456741333008
V
-1,0
BOT
0,39.4996666666667
V
0,-5.47885894775391
V
-1,0
BOT
0,39.5063333333333
V
0,-5.48315048217773
V
-1,0
BOT
0,39.513
V
0,-5.48696517944336
V
-1,0
BOT
0,39.5196666666667
V
0,-5.4931640625
V
-1,0
BOT
0,39.5263333333333
V
0,-5.50127029418945
V
-1,0
BOT
0,39.533
V
0,-5.5084228515625
V
-1,0
BOT
0,39.5396666666667
V
0,-5.51462173461914
V
-1,0
BOT
0,39.5463333333333
V
0,-5.51939010620117
V
-1,0
BOT
0,39.553
V
0,-5.52558898925781
V
-1,0
BOT
0,39.5596666666667
V
0,-5.53131103515625
V
-1,0
BOT
0,39.5663333333333
V
0,-5.53607940673828
V
-1,0
BOT
0,39.573
V
0,-5.54180145263672
V
-1,0
BOT
0,39.5796666666667
V
0,-5.54656982421875
V
-1,0
BOT
0,39.5863333333333
V
0,-5.55133819580078
V
-1,0
BOT
0,39.593
V
0,-5.55181503295898
V
-1,0
BOT
0,39.5996666666667
V
0,-5.55038452148438
V
-1,0
BOT
0,39.6063333333333
V
0,-5.55086135864258
V
-1,0
BOT
0,39.613
V
0,-5.55229187011719
V
-1,0
BOT
0,39.6196666666667
V
0,-5.5546760559082
V
-1,0
BOT
0,39.6263333333333
V
0,-5.55849075317383
V
-1,0
BOT
0,39.633
V
0,-5.56516647338867
V
-1,0
BOT
0,39.6396666666667
V
0,-5.57184219360352
V
-1,0
BOT
0,39.6463333333333
V
0,-5.57565689086914
V
-1,0
BOT
0,39.653
V
0,-5.57661056518555
V
-1,0
BOT
0,39.6596666666667
V
0,-5.57994842529297
V
-1,0
BOT
0,39.6663333333333
V
0,-5.5842399597168
V
-1,0
BOT
0,39.673
V
0,-5.58805465698242
V
-1,0
BOT
0,39.6796666666667
V
0,-5.58853149414063
V
-1,0
BOT
0,39.6863333333333
V
0,-5.58710098266602
V
-1,0
BOT
0,39.693
V
0,-5.58614730834961
V
-1,0
BOT
0,39.6996666666667
V
0,-5.58280944824219
V
-1,0
BOT
0,39.7063333333333
V
0,-5.57899475097656
V
-1,0
BOT
0,39.713
V
0,-5.57470321655273
V
-1,0
BOT
0,39.7196666666667
V
0,-5.57327270507813
V
-1,0
BOT
0,39.7263333333333
V
0,-5.57231903076172
V
-1,0
BOT
0,39.733
V
0,-5.5694580078125
V
-1,0
BOT
0,39.7396666666667
V
0,-5.56278228759766
V
-1,0
BOT
0,39.7463333333333
V
0,-5.55324554443359
V
-1,0
BOT
0,39.753
V
0,-5.54275512695313
V
-1,0
BOT
0,39.7596666666667
V
0,-5.53226470947266
V
-1,0
BOT
0,39.7663333333333
V
0,-5.5232048034668
V
-1,0
BOT
0,39.773
V
0,-5.51557540893555
V
-1,0
BOT
0,39.7796666666667
V
0,-5.5088996887207
V
-1,0
BOT
0,39.7863333333333
V
0,-5.50079345703125
V
-1,0
BOT
0,39.793
V
0,-5.49125671386719
V
-1,0
BOT
0,39.7996666666667
V
0,-5.48171997070313
V
-1,0
BOT
0,39.8063333333333
V
0,-5.47218322753906
V
-1,0
BOT
0,39.813
V
0,-5.46360015869141
V
-1,0
BOT
0,39.8196666666667
V
0,-5.45549392700195
V
-1,0
BOT
0,39.8263333333333
V
0,-5.44929504394531
V
-1,0
BOT
0,39.833
V
0,-5.44500350952148
V
-1,0
BOT
0,39.8396666666667
V
0,-5.43928146362305
V
-1,0
BOT
0,39.8463333333333
V
0,-5.43117523193359
V
-1,0
BOT
0,39.853
V
0,-5.42116165161133
V
-1,0
BOT
0,39.8596666666667
V
0,-5.40971755981445
V
-1,0
BOT
0,39.8663333333333
V
0,-5.39636611938477
V
-1,0
BOT
0,39.873
V
0,-5.38063049316406
V
-1,0
BOT
0,39.8796666666667
V
0,-5.36394119262695
V
-1,0
BOT
0,39.8863333333333
V
0,-5.34439086914063
V
-1,0
BOT
0,39.893
V
0,-5.32341003417969
V
-1,0
BOT
0,39.8996666666667
V
0,-5.30290603637695
V
-1,0
BOT
0,39.9063333333333
V
0,-5.28240203857422
V
-1,0
BOT
0,39.913
V
0,-5.26332855224609
V
-1,0
BOT
0,39.9196666666667
V
0,-5.24425506591797
V
-1,0
BOT
0,39.9263333333333
V
0,-5.22422790527344
V
-1,0
BOT
0,39.933
V
0,-5.2027702331543
V
-1,0
BOT
0,39.9396666666667
V
0,-5.18035888671875
V
-1,0
BOT
0,39.9463333333333
V
0,-5.15651702880859
V
-1,0
BOT
0,39.953
V
0,-5.12790679931641
V
-1,0
BOT
0,39.9596666666667
V
0,-5.09452819824219
V
-1,0
BOT
0,39.9663333333333
V
0,-5.05876541137695
V
-1,0
BOT
0,39.973
V
0,-5.02252578735352
V
-1,0
BOT
0,39.9796666666667
V
0,-4.98580932617188
V
-1,0
BOT
0,39.9863333333333
V
0,-4.94527816772461
V
-1,0
BOT
0,39.993
V
0,-4.90379333496094
V
-1,0
BOT
0,39.9996666666667
V
0,-4.86278533935547
V
-1,0
BOT
0,40.0063333333333
V
0,-4.82177734375
V
-1,0
BOT
0,40.013
V
0,-4.77933883666992
V
-1,0
BOT
0,40.0196666666667
V
0,-4.73499298095703
V
-1,0
BOT
0,40.0263333333333
V
0,-4.68969345092773
V
-1,0
BOT
0,40.033
V
0,-4.64248657226563
V
-1,0
BOT
0,40.0396666666667
V
0,-4.59432601928711
V
-1,0
BOT
0,40.0463333333333
V
0,-4.54378128051758
V
-1,0
BOT
0,40.053
V
0,-4.49323654174805
V
-1,0
BOT
0,40.0596666666667
V
0,-4.4398307800293
V
-1,0
BOT
0,40.0663333333333
V
0,-4.38404083251953
V
-1,0
BOT
0,40.073
V
0,-4.32348251342773
V
-1,0
BOT
0,40.0796666666667
V
0,-4.26054000854492
V
-1,0
BOT
0,40.0863333333333
V
0,-4.19759750366211
V
-1,0
BOT
0,40.093
V
0,-4.13274765014648
V
-1,0
BOT
0,40.0996666666667
V
0,-4.06789779663086
V
-1,0
BOT
0,40.1063333333333
V
0,-4.00352478027344
V
-1,0
BOT
0,40.113
V
0,-3.94058227539062
V
-1,0
BOT
0,40.1196666666667
V
0,-3.8762092590332
V
-1,0
BOT
0,40.1263333333333
V
0,-3.80897521972656
V
-1,0
BOT
0,40.133
V
0,-3.74031066894531
V
-1,0
BOT
0,40.1396666666667
V
0,-3.67069244384766
V
-1,0
BOT
0,40.1463333333333
V
0,-3.59869003295898
V
-1,0
BOT
0,40.153
V
0,-3.5247802734375
V
-1,0
BOT
0,40.1596666666667
V
0,-3.4480094909668
V
-1,0
BOT
0,40.1663333333333
V
0,-3.36980819702148
V
-1,0
BOT
0,40.173
V
0,-3.29160690307617
V
-1,0
BOT
0,40.1796666666667
V
0,-3.21435928344727
V
-1,0
BOT
0,40.1863333333333
V
0,-3.13758850097656
V
-1,0
BOT
0,40.193
V
0,-3.06224822998047
V
-1,0
BOT
0,40.1996666666667
V
0,-2.98976898193359
V
-1,0
BOT
0,40.2063333333333
V
0,-2.91919708251953
V
-1,0
BOT
0,40.213
V
0,-2.85053253173828
V
-1,0
BOT
0,40.2196666666667
V
0,-2.78043746948242
V
-1,0
BOT
0,40.2263333333333
V
0,-2.71272659301758
V
-1,0
BOT
0,40.233
V
0,-2.64549255371094
V
-1,0
BOT
0,40.2396666666667
V
0,-2.5787353515625
V
-1,0
BOT
0,40.2463333333333
V
0,-2.51150131225586
V
-1,0
BOT
0,40.253
V
0,-2.44140625
V
-1,0
BOT
0,40.2596666666667
V
0,-2.37226486206055
V
-1,0
BOT
0,40.2663333333333
V
0,-2.3045539855957
V
-1,0
BOT
0,40.273
V
0,-2.23970413208008
V
-1,0
BOT
0,40.2796666666667
V
0,-2.17723846435547
V
-1,0
BOT
0,40.2863333333333
V
0,-2.11811065673828
V
-1,0
BOT
0,40.293
V
0,-2.06279754638672
V
-1,0
BOT
0,40.2996666666667
V
0,-2.01082229614258
V
-1,0
BOT
0,40.3063333333333
V
0,-1.96313858032227
V
-1,0
BOT
0,40.313
V
0,-1.92022323608398
V
-1,0
BOT
0,40.3196666666667
V
0,-1.88064575195312
V
-1,0
BOT
0,40.3263333333333
V
0,-1.84059143066406
V
-1,0
BOT
0,40.333
V
0,-1.8000602722168
V
-1,0
BOT
0,40.3396666666667
V
0,-1.76239013671875
V
-1,0
BOT
0,40.3463333333333
V
0,-1.72567367553711
V
-1,0
BOT
0,40.353
V
0,-1.69038772583008
V
-1,0
BOT
0,40.3596666666667
V
0,-1.65557861328125
V
-1,0
BOT
0,40.3663333333333
V
0,-1.62696838378906
V
-1,0
BOT
0,40.373
V
0,-1.60312652587891
V
-1,0
BOT
0,40.3796666666667
V
0,-1.58166885375977
V
-1,0
BOT
0,40.3863333333333
V
0,-1.56164169311523
V
-1,0
BOT
0,40.393
V
0,-1.5416145324707
V
-1,0
BOT
0,40.3996666666667
V
0,-1.52301788330078
V
-1,0
BOT
0,40.4063333333333
V
0,-1.50585174560547
V
-1,0
BOT
0,40.413
V
0,-1.49106979370117
V
-1,0
BOT
0,40.4196666666667
V
0,-1.47867202758789
V
-1,0
BOT
0,40.4263333333333
V
0,-1.46865844726562
V
-1,0
BOT
0,40.433
V
0,-1.46245956420898
V
-1,0
BOT
0,40.4396666666667
V
0,-1.46150588989258
V
-1,0
BOT
0,40.4463333333333
V
0,-1.4653205871582
V
-1,0
BOT
0,40.453
V
0,-1.47104263305664
V
-1,0
BOT
0,40.4596666666667
V
0,-1.47819519042969
V
-1,0
BOT
0,40.4663333333333
V
0,-1.48582458496094
V
-1,0
BOT
0,40.473
V
0,-1.4958381652832
V
-1,0
BOT
0,40.4796666666667
V
0,-1.50632858276367
V
-1,0
BOT
0,40.4863333333333
V
0,-1.51634216308594
V
-1,0
BOT
0,40.493
V
0,-1.52826309204102
V
-1,0
BOT
0,40.4996666666667
V
0,-1.54399871826172
V
-1,0
BOT
0,40.5063333333333
V
0,-1.56545639038086
V
-1,0
BOT
0,40.513
V
0,-1.58786773681641
V
-1,0
BOT
0,40.5196666666667
V
0,-1.61123275756836
V
-1,0
BOT
0,40.5263333333333
V
0,-1.63459777832031
V
-1,0
BOT
0,40.533
V
0,-1.65748596191406
V
-1,0
BOT
0,40.5396666666667
V
0,-1.6779899597168
V
-1,0
BOT
0,40.5463333333333
V
0,-1.69801712036133
V
-1,0
BOT
0,40.553
V
0,-1.71995162963867
V
-1,0
BOT
0,40.5596666666667
V
0,-1.74570083618164
V
-1,0
BOT
0,40.5663333333333
V
0,-1.77288055419922
V
-1,0
BOT
0,40.573
V
0,-1.80196762084961
V
-1,0
BOT
0,40.5796666666667
V
0,-1.8305778503418
V
-1,0
BOT
0,40.5863333333333
V
0,-1.85966491699219
V
-1,0
BOT
0,40.593
V
0,-1.88732147216797
V
-1,0
BOT
0,40.5996666666667
V
0,-1.91259384155273
V
-1,0
BOT
0,40.6063333333333
V
0,-1.93929672241211
V
-1,0
BOT
0,40.613
V
0,-1.9683837890625
V
-1,0
BOT
0,40.6196666666667
V
0,-2.00223922729492
V
-1,0
BOT
0,40.6263333333333
V
0,-2.03657150268555
V
-1,0
BOT
0,40.633
V
0,-2.07185745239258
V
-1,0
BOT
0,40.6396666666667
V
0,-2.10809707641602
V
-1,0
BOT
0,40.6463333333333
V
0,-2.14481353759766
V
-1,0
BOT
0,40.653
V
0,-2.1820068359375
V
-1,0
BOT
0,40.6596666666667
V
0,-2.21776962280273
V
-1,0
BOT
0,40.6663333333333
V
0,-2.25448608398437
V
-1,0
BOT
0,40.673
V
0,-2.29072570800781
V
-1,0
BOT
0,40.6796666666667
V
0,-2.32887268066406
V
-1,0
BOT
0,40.6863333333333
V
0,-2.36701965332031
V
-1,0
BOT
0,40.693
V
0,-2.40707397460937
V
-1,0
BOT
0,40.6996666666667
V
0,-2.44998931884766
V
-1,0
BOT
0,40.7063333333333
V
0,-2.49338150024414
V
-1,0
BOT
0,40.713
V
0,-2.53486633300781
V
-1,0
BOT
0,40.7196666666667
V
0,-2.57301330566406
V
-1,0
BOT
0,40.7263333333333
V
0,-2.61068344116211
V
-1,0
BOT
0,40.733
V
0,-2.64787673950195
V
-1,0
BOT
0,40.7396666666667
V
0,-2.6850700378418
V
-1,0
BOT
0,40.7463333333333
V
0,-2.72226333618164
V
-1,0
BOT
0,40.753
V
0,-2.7623176574707
V
-1,0
BOT
0,40.7596666666667
V
0,-2.80380249023437
V
-1,0
BOT
0,40.7663333333333
V
0,-2.84290313720703
V
-1,0
BOT
0,40.773
V
0,-2.87866592407227
V
-1,0
BOT
0,40.7796666666667
V
0,-2.91156768798828
V
-1,0
BOT
0,40.7863333333333
V
0,-2.94589996337891
V
-1,0
BOT
0,40.793
V
0,-2.98261642456055
V
-1,0
BOT
0,40.7996666666667
V
0,-3.01933288574219
V
-1,0
BOT
0,40.8063333333333
V
0,-3.05700302124023
V
-1,0
BOT
0,40.813
V
0,-3.09324264526367
V
-1,0
BOT
0,40.8196666666667
V
0,-3.12900543212891
V
-1,0
BOT
0,40.8263333333333
V
0,-3.16047668457031
V
-1,0
BOT
0,40.833
V
0,-3.1886100769043
V
-1,0
BOT
0,40.8396666666667
V
0,-3.21722030639648
V
-1,0
BOT
0,40.8463333333333
V
0,-3.24726104736328
V
-1,0
BOT
0,40.853
V
0,-3.2806396484375
V
-1,0
BOT
0,40.8596666666667
V
0,-3.31544876098633
V
-1,0
BOT
0,40.8663333333333
V
0,-3.35216522216797
V
-1,0
BOT
0,40.873
V
0,-3.38888168334961
V
-1,0
BOT
0,40.8796666666667
V
0,-3.42369079589844
V
-1,0
BOT
0,40.8863333333333
V
0,-3.45659255981445
V
-1,0
BOT
0,40.893
V
0,-3.48711013793945
V
-1,0
BOT
0,40.8996666666667
V
0,-3.51476669311523
V
-1,0
BOT
0,40.9063333333333
V
0,-3.54146957397461
V
-1,0
BOT
0,40.913
V
0,-3.56769561767578
V
-1,0
BOT
0,40.9196666666667
V
0,-3.59582901000977
V
-1,0
BOT
0,40.9263333333333
V
0,-3.62586975097656
V
-1,0
BOT
0,40.933
V
0,-3.65686416625977
V
-1,0
BOT
0,40.9396666666667
V
0,-3.68881225585937
V
-1,0
BOT
0,40.9463333333333
V
0,-3.7226676940918
V
-1,0
BOT
0,40.953
V
0,-3.75747680664062
V
-1,0
BOT
0,40.9596666666667
V
0,-3.79228591918945
V
-1,0
BOT
0,40.9663333333333
V
0,-3.82900238037109
V
-1,0
BOT
0,40.973
V
0,-3.86667251586914
V
-1,0
BOT
0,40.9796666666667
V
0,-3.90434265136719
V
-1,0
BOT
0,40.9863333333333
V
0,-3.93819808959961
V
-1,0
BOT
0,40.993
V
0,-3.97062301635742
V
-1,0
BOT
0,40.9996666666667
V
0,-4.00495529174805
V
-1,0
BOT
0,41.0063333333333
V
0,-4.03928756713867
V
-1,0
BOT
0,41.013
V
0,-4.07266616821289
V
-1,0
BOT
0,41.0196666666667
V
0,-4.10556793212891
V
-1,0
BOT
0,41.0263333333333
V
0,-4.14085388183594
V
-1,0
BOT
0,41.033
V
0,-4.17709350585938
V
-1,0
BOT
0,41.0396666666667
V
0,-4.21285629272461
V
-1,0
BOT
0,41.0463333333333
V
0,-4.24671173095703
V
-1,0
BOT
0,41.053
V
0,-4.28104400634766
V
-1,0
BOT
0,41.0596666666667
V
0,-4.31632995605469
V
-1,0
BOT
0,41.0663333333333
V
0,-4.35209274291992
V
-1,0
BOT
0,41.073
V
0,-4.38928604125977
V
-1,0
BOT
0,41.0796666666667
V
0,-4.42647933959961
V
-1,0
BOT
0,41.0863333333333
V
0,-4.46271896362305
V
-1,0
BOT
0,41.093
V
0,-4.49705123901367
V
-1,0
BOT
0,41.0996666666667
V
0,-4.53090667724609
V
-1,0
BOT
0,41.1063333333333
V
0,-4.56523895263672
V
-1,0
BOT
0,41.113
V
0,-4.59814071655273
V
-1,0
BOT
0,41.1196666666667
V
0,-4.62913513183594
V
-1,0
BOT
0,41.1263333333333
V
0,-4.66251373291016
V
-1,0
BOT
0,41.133
V
0,-4.69732284545898
V
-1,0
BOT
0,41.1396666666667
V
0,-4.7307014465332
V
-1,0
BOT
0,41.1463333333333
V
0,-4.7612190246582
V
-1,0
BOT
0,41.153
V
0,-4.79269027709961
V
-1,0
BOT
0,41.1596666666667
V
0,-4.82511520385742
V
-1,0
BOT
0,41.1663333333333
V
0,-4.85706329345703
V
-1,0
BOT
0,41.173
V
0,-4.88758087158203
V
-1,0
BOT
0,41.1796666666667
V
0,-4.91952896118164
V
-1,0
BOT
0,41.1863333333333
V
0,-4.95290756225586
V
-1,0
BOT
0,41.193
V
0,-4.98294830322266
V
-1,0
BOT
0,41.1996666666667
V
0,-5.01108169555664
V
-1,0
BOT
0,41.2063333333333
V
0,-5.03683090209961
V
-1,0
BOT
0,41.213
V
0,-5.06210327148438
V
-1,0
BOT
0,41.2196666666667
V
0,-5.08737564086914
V
-1,0
BOT
0,41.2263333333333
V
0,-5.11074066162109
V
-1,0
BOT
0,41.233
V
0,-5.13362884521484
V
-1,0
BOT
0,41.2396666666667
V
0,-5.15651702880859
V
-1,0
BOT
0,41.2463333333333
V
0,-5.18369674682617
V
-1,0
BOT
0,41.253
V
0,-5.21135330200195
V
-1,0
BOT
0,41.2596666666667
V
0,-5.23567199707031
V
-1,0
BOT
0,41.2663333333333
V
0,-5.25665283203125
V
-1,0
BOT
0,41.273
V
0,-5.27620315551758
V
-1,0
BOT
0,41.2796666666667
V
0,-5.29384613037109
V
-1,0
BOT
0,41.2863333333333
V
0,-5.30624389648438
V
-1,0
BOT
0,41.293
V
0,-5.31482696533203
V
-1,0
BOT
0,41.2996666666667
V
0,-5.3253173828125
V
-1,0
BOT
0,41.3063333333333
V
0,-5.3410530090332
V
-1,0
BOT
0,41.313
V
0,-5.35917282104492
V
-1,0
BOT
0,41.3196666666667
V
0,-5.37538528442383
V
-1,0
BOT
0,41.3263333333333
V
0,-5.39064407348633
V
-1,0
BOT
0,41.333
V
0,-5.40447235107422
V
-1,0
BOT
0,41.3396666666667
V
0,-5.41877746582031
V
-1,0
BOT
0,41.3463333333333
V
0,-5.43117523193359
V
-1,0
BOT
0,41.353
V
0,-5.44404983520508
V
-1,0
BOT
0,41.3596666666667
V
0,-5.45883178710938
V
-1,0
BOT
0,41.3663333333333
V
0,-5.47409057617188
V
-1,0
BOT
0,41.373
V
0,-5.48982620239258
V
-1,0
BOT
0,41.3796666666667
V
0,-5.50460815429688
V
-1,0
BOT
0,41.3863333333333
V
0,-5.51652908325195
V
-1,0
BOT
0,41.393
V
0,-5.5232048034668
V
-1,0
BOT
0,41.3996666666667
V
0,-5.52701950073242
V
-1,0
BOT
0,41.4063333333333
V
0,-5.53035736083984
V
-1,0
BOT
0,41.413
V
0,-5.53464889526367
V
-1,0
BOT
0,41.4196666666667
V
0,-5.5394172668457
V
-1,0
BOT
0,41.4263333333333
V
0,-5.54513931274414
V
-1,0
BOT
0,41.433
V
0,-5.5537223815918
V
-1,0
BOT
0,41.4396666666667
V
0,-5.56564331054688
V
-1,0
BOT
0,41.4463333333333
V
0,-5.57994842529297
V
-1,0
BOT
0,41.453
V
0,-5.59377670288086
V
-1,0
BOT
0,41.4596666666667
V
0,-5.60569763183594
V
-1,0
BOT
0,41.4663333333333
V
0,-5.61428070068359
V
-1,0
BOT
0,41.473
V
0,-5.62047958374023
V
-1,0
BOT
0,41.4796666666667
V
0,-5.62524795532227
V
-1,0
BOT
0,41.4863333333333
V
0,-5.62858581542969
V
-1,0
BOT
0,41.493
V
0,-5.6300163269043
V
-1,0
BOT
0,41.4996666666667
V
0,-5.6309700012207
V
-1,0
BOT
0,41.5063333333333
V
0,-5.63240051269531
V
-1,0
BOT
0,41.513
V
0,-5.63287734985352
V
-1,0
BOT
0,41.5196666666667
V
0,-5.63335418701172
V
-1,0
BOT
0,41.5263333333333
V
0,-5.63240051269531
V
-1,0
BOT
0,41.533
V
0,-5.6309700012207
V
-1,0
BOT
0,41.5396666666667
V
0,-5.62810897827148
V
-1,0
BOT
0,41.5463333333333
V
0,-5.62667846679688
V
-1,0
BOT
0,41.553
V
0,-5.62286376953125
V
-1,0
BOT
0,41.5596666666667
V
0,-5.61618804931641
V
-1,0
BOT
0,41.5663333333333
V
0,-5.60474395751953
V
-1,0
BOT
0,41.573
V
0,-5.59234619140625
V
-1,0
BOT
0,41.5796666666667
V
0,-5.58233261108398
V
-1,0
BOT
0,41.5863333333333
V
0,-5.57279586791992
V
-1,0
BOT
0,41.593
V
0,-5.56468963623047
V
-1,0
BOT
0,41.5996666666667
V
0,-5.55896759033203
V
-1,0
BOT
0,41.6063333333333
V
0,-5.55610656738281
V
-1,0
BOT
0,41.613
V
0,-5.55515289306641
V
-1,0
BOT
0,41.6196666666667
V
0,-5.55324554443359
V
-1,0
BOT
0,41.6263333333333
V
0,-5.54752349853516
V
-1,0
BOT
0,41.633
V
0,-5.54132461547852
V
-1,0
BOT
0,41.6396666666667
V
0,-5.53798675537109
V
-1,0
BOT
0,41.6463333333333
V
0,-5.53798675537109
V
-1,0
BOT
0,41.653
V
0,-5.5384635925293
V
-1,0
BOT
0,41.6596666666667
V
0,-5.5394172668457
V
-1,0
BOT
0,41.6663333333333
V
0,-5.54370880126953
V
-1,0
BOT
0,41.673
V
0,-5.54895401000977
V
-1,0
BOT
0,41.6796666666667
V
0,-5.55038452148438
V
-1,0
BOT
0,41.6863333333333
V
0,-5.54990768432617
V
-1,0
BOT
0,41.693
V
0,-5.54990768432617
V
-1,0
BOT
0,41.6996666666667
V
0,-5.55038452148438
V
-1,0
BOT
0,41.7063333333333
V
0,-5.55181503295898
V
-1,0
BOT
0,41.713
V
0,-5.55324554443359
V
-1,0
BOT
0,41.7196666666667
V
0,-5.55849075317383
V
-1,0
BOT
0,41.7263333333333
V
0,-5.56373596191406
V
-1,0
BOT
0,41.733
V
0,-5.56755065917969
V
-1,0
BOT
0,41.7396666666667
V
0,-5.57327270507813
V
-1,0
BOT
0,41.7463333333333
V
0,-5.57851791381836
V
-1,0
BOT
0,41.753
V
0,-5.58137893676758
V
-1,0
BOT
0,41.7596666666667
V
0,-5.58137893676758
V
-1,0
BOT
0,41.7663333333333
V
0,-5.58090209960938
V
-1,0
BOT
0,41.773
V
0,-5.58328628540039
V
-1,0
BOT
0,41.7796666666667
V
0,-5.58233261108398
V
-1,0
BOT
0,41.7863333333333
V
0,-5.58090209960938
V
-1,0
BOT
0,41.793
V
0,-5.58090209960938
V
-1,0
BOT
0,41.7996666666667
V
0,-5.58328628540039
V
-1,0
BOT
0,41.8063333333333
V
0,-5.58710098266602
V
-1,0
BOT
0,41.813
V
0,-5.58948516845703
V
-1,0
BOT
0,41.8196666666667
V
0,-5.59043884277344
V
-1,0
BOT
0,41.8263333333333
V
0,-5.58853149414063
V
-1,0
BOT
0,41.833
V
0,-5.58614730834961
V
-1,0
BOT
0,41.8396666666667
V
0,-5.58376312255859
V
-1,0
BOT
0,41.8463333333333
V
0,-5.58328628540039
V
-1,0
BOT
0,41.853
V
0,-5.5842399597168
V
-1,0
BOT
0,41.8596666666667
V
0,-5.5851936340332
V
-1,0
BOT
0,41.8663333333333
V
0,-5.58710098266602
V
-1,0
BOT
0,41.873
V
0,-5.58996200561523
V
-1,0
BOT
0,41.8796666666667
V
0,-5.59282302856445
V
-1,0
BOT
0,41.8863333333333
V
0,-5.58996200561523
V
-1,0
BOT
0,41.893
V
0,-5.58185577392578
V
-1,0
BOT
0,41.8996666666667
V
0,-5.57088851928711
V
-1,0
BOT
0,41.9063333333333
V
0,-5.56039810180664
V
-1,0
BOT
0,41.913
V
0,-5.54990768432617
V
-1,0
BOT
0,41.9196666666667
V
0,-5.5389404296875
V
-1,0
BOT
0,41.9263333333333
V
0,-5.53035736083984
V
-1,0
BOT
0,41.933
V
0,-5.52463531494141
V
-1,0
BOT
0,41.9396666666667
V
0,-5.52225112915039
V
-1,0
BOT
0,41.9463333333333
V
0,-5.52272796630859
V
-1,0
BOT
0,41.953
V
0,-5.5241584777832
V
-1,0
BOT
0,41.9596666666667
V
0,-5.52654266357422
V
-1,0
BOT
0,41.9663333333333
V
0,-5.52749633789063
V
-1,0
BOT
0,41.973
V
0,-5.52845001220703
V
-1,0
BOT
0,41.9796666666667
V
0,-5.52988052368164
V
-1,0
BOT
0,41.9863333333333
V
0,-5.53131103515625
V
-1,0
BOT
0,41.993
V
0,-5.53035736083984
V
-1,0
BOT
0,41.9996666666667
V
0,-5.52654266357422
V
-1,0
BOT
0,42.0063333333333
V
0,-5.52082061767578
V
-1,0
BOT
0,42.013
V
0,-5.51509857177734
V
-1,0
BOT
0,42.0196666666667
V
0,-5.51033020019531
V
-1,0
BOT
0,42.0263333333333
V
0,-5.50317764282227
V
-1,0
BOT
0,42.033
V
0,-5.4931640625
V
-1,0
BOT
0,42.0396666666667
V
0,-5.48267364501953
V
-1,0
BOT
0,42.0463333333333
V
0,-5.47409057617188
V
-1,0
BOT
0,42.053
V
0,-5.46503067016602
V
-1,0
BOT
0,42.0596666666667
V
0,-5.45549392700195
V
-1,0
BOT
0,42.0663333333333
V
0,-5.44500350952148
V
-1,0
BOT
0,42.073
V
0,-5.43594360351563
V
-1,0
BOT
0,42.0796666666667
V
0,-5.42593002319336
V
-1,0
BOT
0,42.0863333333333
V
0,-5.41353225708008
V
-1,0
BOT
0,42.093
V
0,-5.39922714233398
V
-1,0
BOT
0,42.0996666666667
V
0,-5.38539886474609
V
-1,0
BOT
0,42.1063333333333
V
0,-5.37300109863281
V
-1,0
BOT
0,42.113
V
0,-5.36203384399414
V
-1,0
BOT
0,42.1196666666667
V
0,-5.35058975219727
V
-1,0
BOT
0,42.1263333333333
V
0,-5.33866882324219
V
-1,0
BOT
0,42.133
V
0,-5.3257942199707
V
-1,0
BOT
0,42.1396666666667
V
0,-5.31101226806641
V
-1,0
BOT
0,42.1463333333333
V
0,-5.29384613037109
V
-1,0
BOT
0,42.153
V
0,-5.27524948120117
V
-1,0
BOT
0,42.1596666666667
V
0,-5.25712966918945
V
-1,0
BOT
0,42.1663333333333
V
0,-5.23996353149414
V
-1,0
BOT
0,42.173
V
0,-5.22375106811523
V
-1,0
BOT
0,42.1796666666667
V
0,-5.20658493041992
V
-1,0
BOT
0,42.1863333333333
V
0,-5.18655776977539
V
-1,0
BOT
0,42.193
V
0,-5.16414642333984
V
-1,0
BOT
0,42.1996666666667
V
0,-5.1417350769043
V
-1,0
BOT
0,42.2063333333333
V
0,-5.11932373046875
V
-1,0
BOT
0,42.213
V
0,-5.09738922119141
V
-1,0
BOT
0,42.2196666666667
V
0,-5.07688522338867
V
-1,0
BOT
0,42.2263333333333
V
0,-5.05971908569336
V
-1,0
BOT
0,42.233
V
0,-5.04350662231445
V
-1,0
BOT
0,42.2396666666667
V
0,-5.02681732177734
V
-1,0
BOT
0,42.2463333333333
V
0,-5.00965118408203
V
-1,0
BOT
0,42.253
V
0,-4.99248504638672
V
-1,0
BOT
0,42.2596666666667
V
0,-4.97341156005859
V
-1,0
BOT
0,42.2663333333333
V
0,-4.95243072509766
V
-1,0
BOT
0,42.273
V
0,-4.93288040161133
V
-1,0
BOT
0,42.2796666666667
V
0,-4.91571426391602
V
-1,0
BOT
0,42.2863333333333
V
0,-4.89902496337891
V
-1,0
BOT
0,42.293
V
0,-4.88185882568359
V
-1,0
BOT
0,42.2996666666667
V
0,-4.86660003662109
V
-1,0
BOT
0,42.3063333333333
V
0,-4.85372543334961
V
-1,0
BOT
0,42.313
V
0,-4.84132766723633
V
-1,0
BOT
0,42.3196666666667
V
0,-4.82749938964844
V
-1,0
BOT
0,42.3263333333333
V
0,-4.81367111206055
V
-1,0
BOT
0,42.333
V
0,-4.80031967163086
V
-1,0
BOT
0,42.3396666666667
V
0,-4.78792190551758
V
-1,0
BOT
0,42.3463333333333
V
0,-4.7755241394043
V
-1,0
BOT
0,42.353
V
0,-4.76312637329102
V
-1,0
BOT
0,42.3596666666667
V
0,-4.75168228149414
V
-1,0
BOT
0,42.3663333333333
V
0,-4.74262237548828
V
-1,0
BOT
0,42.373
V
0,-4.73356246948242
V
-1,0
BOT
0,42.3796666666667
V
0,-4.72497940063477
V
-1,0
BOT
0,42.3863333333333
V
0,-4.71639633178711
V
-1,0
BOT
0,42.393
V
0,-4.70733642578125
V
-1,0
BOT
0,42.3996666666667
V
0,-4.69827651977539
V
-1,0
BOT
0,42.4063333333333
V
0,-4.68921661376953
V
-1,0
BOT
0,42.413
V
0,-4.68111038208008
V
-1,0
BOT
0,42.4196666666667
V
0,-4.67300415039063
V
-1,0
BOT
0,42.4263333333333
V
0,-4.66585159301758
V
-1,0
BOT
0,42.433
V
0,-4.65965270996094
V
-1,0
BOT
0,42.4396666666667
V
0,-4.6539306640625
V
-1,0
BOT
0,42.4463333333333
V
0,-4.64630126953125
V
-1,0
BOT
0,42.453
V
0,-4.6391487121582
V
-1,0
BOT
0,42.4596666666667
V
0,-4.63390350341797
V
-1,0
BOT
0,42.4663333333333
V
0,-4.62770462036133
V
-1,0
BOT
0,42.473
V
0,-4.62102890014648
V
-1,0
BOT
0,42.4796666666667
V
0,-4.61339950561523
V
-1,0
BOT
0,42.4863333333333
V
0,-4.60672378540039
V
-1,0
BOT
0,42.493
V
0,-4.60100173950195
V
-1,0
BOT
0,42.4996666666667
V
0,-4.59718704223633
V
-1,0
BOT
0,42.5063333333333
V
0,-4.59718704223633
V
-1,0
BOT
0,42.513
V
0,-4.60052490234375
V
-1,0
BOT
0,42.5196666666667
V
0,-4.608154296875
V
-1,0
BOT
0,42.5263333333333
V
0,-4.61626052856445
V
-1,0
BOT
0,42.533
V
0,-4.62436676025391
V
-1,0
BOT
0,42.5396666666667
V
0,-4.63294982910156
V
-1,0
BOT
0,42.5463333333333
V
0,-4.64248657226563
V
-1,0
BOT
0,42.553
V
0,-4.65202331542969
V
-1,0
BOT
0,42.5596666666667
V
0,-4.66108322143555
V
-1,0
BOT
0,42.5663333333333
V
0,-4.67157363891602
V
-1,0
BOT
0,42.573
V
0,-4.68301773071289
V
-1,0
BOT
0,42.5796666666667
V
0,-4.69350814819336
V
-1,0
BOT
0,42.5863333333333
V
0,-4.70352172851563
V
-1,0
BOT
0,42.593
V
0,-4.7149658203125
V
-1,0
BOT
0,42.5996666666667
V
0,-4.72879409790039
V
-1,0
BOT
0,42.6063333333333
V
0,-4.74262237548828
V
-1,0
BOT
0,42.613
V
0,-4.75597381591797
V
-1,0
BOT
0,42.6196666666667
V
0,-4.76932525634766
V
-1,0
BOT
0,42.6263333333333
V
0,-4.78363037109375
V
-1,0
BOT
0,42.633
V
0,-4.79698181152344
V
-1,0
BOT
0,42.6396666666667
V
0,-4.81128692626953
V
-1,0
BOT
0,42.6463333333333
V
0,-4.82797622680664
V
-1,0
BOT
0,42.653
V
0,-4.84514236450195
V
-1,0
BOT
0,42.6596666666667
V
0,-4.86230850219727
V
-1,0
BOT
0,42.6663333333333
V
0,-4.87899780273438
V
-1,0
BOT
0,42.673
V
0,-4.89711761474609
V
-1,0
BOT
0,42.6796666666667
V
0,-4.9138069152832
V
-1,0
BOT
0,42.6863333333333
V
0,-4.92715835571289
V
-1,0
BOT
0,42.693
V
0,-4.93860244750977
V
-1,0
BOT
0,42.6996666666667
V
0,-4.95052337646484
V
-1,0
BOT
0,42.7063333333333
V
0,-4.96292114257813
V
-1,0
BOT
0,42.713
V
0,-4.9738883972168
V
-1,0
BOT
0,42.7196666666667
V
0,-4.98199462890625
V
-1,0
BOT
0,42.7263333333333
V
0,-4.9891471862793
V
-1,0
BOT
0,42.733
V
0,-4.99725341796875
V
-1,0
BOT
0,42.7396666666667
V
0,-5.00679016113281
V
-1,0
BOT
0,42.7463333333333
V
0,-5.01680374145508
V
-1,0
BOT
0,42.753
V
0,-5.02777099609375
V
-1,0
BOT
0,42.7596666666667
V
0,-5.04159927368164
V
-1,0
BOT
0,42.7663333333333
V
0,-5.05542755126953
V
-1,0
BOT
0,42.773
V
0,-5.06687164306641
V
-1,0
BOT
0,42.7796666666667
V
0,-5.07450103759766
V
-1,0
BOT
0,42.7863333333333
V
0,-5.07926940917969
V
-1,0
BOT
0,42.793
V
0,-5.0816535949707
V
-1,0
BOT
0,42.7996666666667
V
0,-5.08499145507813
V
-1,0
BOT
0,42.8063333333333
V
0,-5.09166717529297
V
-1,0
BOT
0,42.813
V
0,-5.10168075561523
V
-1,0
BOT
0,42.8196666666667
V
0,-5.11264801025391
V
-1,0
BOT
0,42.8263333333333
V
0,-5.12409210205078
V
-1,0
BOT
0,42.833
V
0,-5.13505935668945
V
-1,0
BOT
0,42.8396666666667
V
0,-5.14316558837891
V
-1,0
BOT
0,42.8463333333333
V
0,-5.14602661132813
V
-1,0
BOT
0,42.853
V
0,-5.14602661132813
V
-1,0
BOT
0,42.8596666666667
V
0,-5.14507293701172
V
-1,0
BOT
0,42.8663333333333
V
0,-5.14554977416992
V
-1,0
BOT
0,42.873
V
0,-5.14793395996094
V
-1,0
BOT
0,42.8796666666667
V
0,-5.15174865722656
V
-1,0
BOT
0,42.8863333333333
V
0,-5.15985488891602
V
-1,0
BOT
0,42.893
V
0,-5.17034530639648
V
-1,0
BOT
0,42.8996666666667
V
0,-5.17940521240234
V
-1,0
BOT
0,42.9063333333333
V
0,-5.18465042114258
V
-1,0
BOT
0,42.913
V
0,-5.18608093261719
V
-1,0
BOT
0,42.9196666666667
V
0,-5.18798828125
V
-1,0
BOT
0,42.9263333333333
V
0,-5.18894195556641
V
-1,0
BOT
0,42.933
V
0,-5.19037246704102
V
-1,0
BOT
0,42.9396666666667
V
0,-5.19466400146484
V
-1,0
BOT
0,42.9463333333333
V
0,-5.20133972167969
V
-1,0
BOT
0,42.953
V
0,-5.20753860473633
V
-1,0
BOT
0,42.9596666666667
V
0,-5.21135330200195
V
-1,0
BOT
0,42.9663333333333
V
0,-5.21469116210938
V
-1,0
BOT
0,42.973
V
0,-5.2180290222168
V
-1,0
BOT
0,42.9796666666667
V
0,-5.21993637084961
V
-1,0
BOT
0,42.9863333333333
V
0,-5.22232055664063
V
-1,0
BOT
0,42.993
V
0,-5.22708892822266
V
-1,0
BOT
0,42.9996666666667
V
0,-5.2342414855957
V
-1,0
BOT
0,43.0063333333333
V
0,-5.24139404296875
V
-1,0
BOT
0,43.013
V
0,-5.24806976318359
V
-1,0
BOT
0,43.0196666666667
V
0,-5.25379180908203
V
-1,0
BOT
0,43.0263333333333
V
0,-5.26046752929688
V
-1,0
BOT
0,43.033
V
0,-5.26618957519531
V
-1,0
BOT
0,43.0396666666667
V
0,-5.27048110961914
V
-1,0
BOT
0,43.0463333333333
V
0,-5.27095794677734
V
-1,0
BOT
0,43.053
V
0,-5.27191162109375
V
-1,0
BOT
0,43.0596666666667
V
0,-5.27286529541016
V
-1,0
BOT
0,43.0663333333333
V
0,-5.27286529541016
V
-1,0
BOT
0,43.073
V
0,-5.27143478393555
V
-1,0
BOT
0,43.0796666666667
V
0,-5.26905059814453
V
-1,0
BOT
0,43.0863333333333
V
0,-5.26809692382813
V
-1,0
BOT
0,43.093
V
0,-5.26618957519531
V
-1,0
BOT
0,43.0996666666667
V
0,-5.26571273803711
V
-1,0
BOT
0,43.1063333333333
V
0,-5.26571273803711
V
-1,0
BOT
0,43.113
V
0,-5.26666641235352
V
-1,0
BOT
0,43.1196666666667
V
0,-5.26809692382813
V
-1,0
BOT
0,43.1263333333333
V
0,-5.27191162109375
V
-1,0
BOT
0,43.133
V
0,-5.27572631835938
V
-1,0
BOT
0,43.1396666666667
V
0,-5.27667999267578
V
-1,0
BOT
0,43.1463333333333
V
0,-5.27572631835938
V
-1,0
BOT
0,43.153
V
0,-5.27334213256836
V
-1,0
BOT
0,43.1596666666667
V
0,-5.27238845825195
V
-1,0
BOT
0,43.1663333333333
V
0,-5.27048110961914
V
-1,0
BOT
0,43.173
V
0,-5.27048110961914
V
-1,0
BOT
0,43.1796666666667
V
0,-5.27381896972656
V
-1,0
BOT
0,43.1863333333333
V
0,-5.27715682983398
V
-1,0
BOT
0,43.193
V
0,-5.28049468994141
V
-1,0
BOT
0,43.1996666666667
V
0,-5.28192520141602
V
-1,0
BOT
0,43.2063333333333
V
0,-5.28240203857422
V
-1,0
BOT
0,43.213
V
0,-5.28097152709961
V
-1,0
BOT
0,43.2196666666667
V
0,-5.27763366699219
V
-1,0
BOT
0,43.2263333333333
V
0,-5.27429580688477
V
-1,0
BOT
0,43.233
V
0,-5.27143478393555
V
-1,0
BOT
0,43.2396666666667
V
0,-5.27143478393555
V
-1,0
BOT
0,43.2463333333333
V
0,-5.27191162109375
V
-1,0
BOT
0,43.253
V
0,-5.27143478393555
V
-1,0
BOT
0,43.2596666666667
V
0,-5.27143478393555
V
-1,0
BOT
0,43.2663333333333
V
0,-5.27191162109375
V
-1,0
BOT
0,43.273
V
0,-5.27334213256836
V
-1,0
BOT
0,43.2796666666667
V
0,-5.27286529541016
V
-1,0
BOT
0,43.2863333333333
V
0,-5.27048110961914
V
-1,0
BOT
0,43.293
V
0,-5.26571273803711
V
-1,0
BOT
0,43.2996666666667
V
0,-5.25951385498047
V
-1,0
BOT
0,43.3063333333333
V
0,-5.25426864624023
V
-1,0
BOT
0,43.313
V
0,-5.25093078613281
V
-1,0
BOT
0,43.3196666666667
V
0,-5.24997711181641
V
-1,0
BOT
0,43.3263333333333
V
0,-5.25093078613281
V
-1,0
BOT
0,43.333
V
0,-5.25474548339844
V
-1,0
BOT
0,43.3396666666667
V
0,-5.25903701782227
V
-1,0
BOT
0,43.3463333333333
V
0,-5.26046752929688
V
-1,0
BOT
0,43.353
V
0,-5.25760650634766
V
-1,0
BOT
0,43.3596666666667
V
0,-5.25569915771484
V
-1,0
BOT
0,43.3663333333333
V
0,-5.25665283203125
V
-1,0
BOT
0,43.373
V
0,-5.25903701782227
V
-1,0
BOT
0,43.3796666666667
V
0,-5.26285171508789
V
-1,0
BOT
0,43.3863333333333
V
0,-5.26666641235352
V
-1,0
BOT
0,43.393
V
0,-5.27000427246094
V
-1,0
BOT
0,43.3996666666667
V
0,-5.26905059814453
V
-1,0
BOT
0,43.4063333333333
V
0,-5.26523590087891
V
-1,0
BOT
0,43.413
V
0,-5.26094436645508
V
-1,0
BOT
0,43.4196666666667
V
0,-5.25808334350586
V
-1,0
BOT
0,43.4263333333333
V
0,-5.25903701782227
V
-1,0
BOT
0,43.433
V
0,-5.26189804077148
V
-1,0
BOT
0,43.4396666666667
V
0,-5.26618957519531
V
-1,0
BOT
0,43.4463333333333
V
0,-5.27095794677734
V
-1,0
BOT
0,43.453
V
0,-5.27620315551758
V
-1,0
BOT
0,43.4596666666667
V
0,-5.28240203857422
V
-1,0
BOT
0,43.4663333333333
V
0,-5.28717041015625
V
-1,0
BOT
0,43.473
V
0,-5.29050827026367
V
-1,0
BOT
0,43.4796666666667
V
0,-5.29241561889648
V
-1,0
BOT
0,43.4863333333333
V
0,-5.29384613037109
V
-1,0
BOT
0,43.493
V
0,-5.29623031616211
V
-1,0
BOT
0,43.4996666666667
V
0,-5.29766082763672
V
-1,0
BOT
0,43.5063333333333
V
0,-5.29956817626953
V
-1,0
BOT
0,43.513
V
0,-5.30433654785156
V
-1,0
BOT
0,43.5196666666667
V
0,-5.31148910522461
V
-1,0
BOT
0,43.5263333333333
V
0,-5.31911849975586
V
-1,0
BOT
0,43.533
V
0,-5.32388687133789
V
-1,0
BOT
0,43.5396666666667
V
0,-5.32627105712891
V
-1,0
BOT
0,43.5463333333333
V
0,-5.3257942199707
V
-1,0
BOT
0,43.553
V
0,-5.32388687133789
V
-1,0
BOT
0,43.5596666666667
V
0,-5.32102584838867
V
-1,0
BOT
0,43.5663333333333
V
0,-5.31625747680664
V
-1,0
BOT
0,43.573
V
0,-5.31148910522461
V
-1,0
BOT
0,43.5796666666667
V
0,-5.30719757080078
V
-1,0
BOT
0,43.5863333333333
V
0,-5.30672073364258
V
-1,0
BOT
0,43.593
V
0,-5.30719757080078
V
-1,0
BOT
0,43.5996666666667
V
0,-5.30767440795898
V
-1,0
BOT
0,43.6063333333333
V
0,-5.30910491943359
V
-1,0
BOT
0,43.613
V
0,-5.31005859375
V
-1,0
BOT
0,43.6196666666667
V
0,-5.3105354309082
V
-1,0
BOT
0,43.6263333333333
V
0,-5.30910491943359
V
-1,0
BOT
0,43.633
V
0,-5.30624389648438
V
-1,0
BOT
0,43.6396666666667
V
0,-5.30338287353516
V
-1,0
BOT
0,43.6463333333333
V
0,-5.30052185058594
V
-1,0
BOT
0,43.653
V
0,-5.29861450195313
V
-1,0
BOT
0,43.6596666666667
V
0,-5.29718399047852
V
-1,0
BOT
0,43.6663333333333
V
0,-5.29623031616211
V
-1,0
BOT
0,43.673
V
0,-5.29336929321289
V
-1,0
BOT
0,43.6796666666667
V
0,-5.29003143310547
V
-1,0
BOT
0,43.6863333333333
V
0,-5.28812408447266
V
-1,0
BOT
0,43.693
V
0,-5.28669357299805
V
-1,0
BOT
0,43.6996666666667
V
0,-5.28526306152344
V
-1,0
BOT
0,43.7063333333333
V
0,-5.28335571289063
V
-1,0
BOT
0,43.713
V
0,-5.28383255004883
V
-1,0
BOT
0,43.7196666666667
V
0,-5.28669357299805
V
-1,0
BOT
0,43.7263333333333
V
0,-5.29146194458008
V
-1,0
BOT
0,43.733
V
0,-5.29956817626953
V
-1,0
BOT
0,43.7396666666667
V
0,-5.30910491943359
V
-1,0
BOT
0,43.7463333333333
V
0,-5.31625747680664
V
-1,0
BOT
0,43.753
V
0,-5.31959533691406
V
-1,0
BOT
0,43.7596666666667
V
0,-5.32388687133789
V
-1,0
BOT
0,43.7663333333333
V
0,-5.32817840576172
V
-1,0
BOT
0,43.773
V
0,-5.33151626586914
V
-1,0
BOT
0,43.7796666666667
V
0,-5.33485412597656
V
-1,0
BOT
0,43.7863333333333
V
0,-5.3410530090332
V
-1,0
BOT
0,43.793
V
0,-5.35106658935547
V
-1,0
BOT
0,43.7996666666667
V
0,-5.36108016967773
V
-1,0
BOT
0,43.8063333333333
V
0,-5.36966323852539
V
-1,0
BOT
0,43.813
V
0,-5.37776947021484
V
-1,0
BOT
0,43.8196666666667
V
0,-5.38778305053711
V
-1,0
BOT
0,43.8263333333333
V
0,-5.40065765380859
V
-1,0
BOT
0,43.833
V
0,-5.41162490844727
V
-1,0
BOT
0,43.8396666666667
V
0,-5.42068481445313
V
-1,0
BOT
0,43.8463333333333
V
0,-5.42879104614258
V
-1,0
BOT
0,43.853
V
0,-5.43689727783203
V
-1,0
BOT
0,43.8596666666667
V
0,-5.44500350952148
V
-1,0
BOT
0,43.8663333333333
V
0,-5.45215606689453
V
-1,0
BOT
0,43.873
V
0,-5.46073913574219
V
-1,0
BOT
0,43.8796666666667
V
0,-5.47218322753906
V
-1,0
BOT
0,43.8863333333333
V
0,-5.48458099365234
V
-1,0
BOT
0,43.893
V
0,-5.49411773681641
V
-1,0
BOT
0,43.8996666666667
V
0,-5.50031661987305
V
-1,0
BOT
0,43.9063333333333
V
0,-5.50222396850586
V
-1,0
BOT
0,43.913
V
0,-5.50222396850586
V
-1,0
BOT
0,43.9196666666667
V
0,-5.50222396850586
V
-1,0
BOT
0,43.9263333333333
V
0,-5.50365447998047
V
-1,0
BOT
0,43.933
V
0,-5.50699234008789
V
-1,0
BOT
0,43.9396666666667
V
0,-5.51128387451172
V
-1,0
BOT
0,43.9463333333333
V
0,-5.51795959472656
V
-1,0
BOT
0,43.953
V
0,-5.52558898925781
V
-1,0
BOT
0,43.9596666666667
V
0,-5.53226470947266
V
-1,0
BOT
0,43.9663333333333
V
0,-5.53512573242188
V
-1,0
BOT
0,43.973
V
0,-5.53560256958008
V
-1,0
BOT
0,43.9796666666667
V
0,-5.53560256958008
V
-1,0
BOT
0,43.9863333333333
V
0,-5.53512573242188
V
-1,0
BOT
0,43.993
V
0,-5.53369522094727
V
-1,0
BOT
0,43.9996666666667
V
0,-5.53417205810547
V
-1,0
BOT
0,44.0063333333333
V
0,-5.53655624389648
V
-1,0
BOT
0,44.013
V
0,-5.54132461547852
V
-1,0
BOT
0,44.0196666666667
V
0,-5.54513931274414
V
-1,0
BOT
0,44.0263333333333
V
0,-5.54847717285156
V
-1,0
BOT
0,44.033
V
0,-5.55133819580078
V
-1,0
BOT
0,44.0396666666667
V
0,-5.55419921875
V
-1,0
BOT
0,44.0463333333333
V
0,-5.55896759033203
V
-1,0
BOT
0,44.053
V
0,-5.56516647338867
V
-1,0
BOT
0,44.0596666666667
V
0,-5.57422637939453
V
-1,0
BOT
0,44.0663333333333
V
0,-5.58280944824219
V
-1,0
BOT
0,44.073
V
0,-5.59091567993164
V
-1,0
BOT
0,44.0796666666667
V
0,-5.59663772583008
V
-1,0
BOT
0,44.0863333333333
V
0,-5.59854507446289
V
-1,0
BOT
0,44.093
V
0,-5.59854507446289
V
-1,0
BOT
0,44.0996666666667
V
0,-5.5999755859375
V
-1,0
BOT
0,44.1063333333333
V
0,-5.60474395751953
V
-1,0
BOT
0,44.113
V
0,-5.61094284057617
V
-1,0
BOT
0,44.1196666666667
V
0,-5.61714172363281
V
-1,0
BOT
0,44.1263333333333
V
0,-5.62381744384766
V
-1,0
BOT
0,44.133
V
0,-5.6309700012207
V
-1,0
BOT
0,44.1396666666667
V
0,-5.63764572143555
V
-1,0
BOT
0,44.1463333333333
V
0,-5.64098358154297
V
-1,0
BOT
0,44.153
V
0,-5.64336776733398
V
-1,0
BOT
0,44.1596666666667
V
0,-5.64765930175781
V
-1,0
BOT
0,44.1663333333333
V
0,-5.65338134765625
V
-1,0
BOT
0,44.173
V
0,-5.65576553344727
V
-1,0
BOT
0,44.1796666666667
V
0,-5.65671920776367
V
-1,0
BOT
0,44.1863333333333
V
0,-5.65862655639648
V
-1,0
BOT
0,44.193
V
0,-5.66244125366211
V
-1,0
BOT
0,44.1996666666667
V
0,-5.66625595092773
V
-1,0
BOT
0,44.2063333333333
V
0,-5.66673278808594
V
-1,0
BOT
0,44.213
V
0,-5.66911697387695
V
-1,0
BOT
0,44.2196666666667
V
0,-5.67054748535156
V
-1,0
BOT
0,44.2263333333333
V
0,-5.67197799682617
V
-1,0
BOT
0,44.233
V
0,-5.67293167114258
V
-1,0
BOT
0,44.2396666666667
V
0,-5.67388534545898
V
-1,0
BOT
0,44.2463333333333
V
0,-5.67626953125
V
-1,0
BOT
0,44.253
V
0,-5.67817687988281
V
-1,0
BOT
0,44.2596666666667
V
0,-5.68246841430664
V
-1,0
BOT
0,44.2663333333333
V
0,-5.68723678588867
V
-1,0
BOT
0,44.273
V
0,-5.68962097167969
V
-1,0
BOT
0,44.2796666666667
V
0,-5.68819046020508
V
-1,0
BOT
0,44.2863333333333
V
0,-5.68485260009766
V
-1,0
BOT
0,44.293
V
0,-5.68056106567383
V
-1,0
BOT
0,44.2996666666667
V
0,-5.67626953125
V
-1,0
BOT
0,44.3063333333333
V
0,-5.67054748535156
V
-1,0
BOT
0,44.313
V
0,-5.66625595092773
V
-1,0
BOT
0,44.3196666666667
V
0,-5.66291809082031
V
-1,0
BOT
0,44.3263333333333
V
0,-5.65862655639648
V
-1,0
BOT
0,44.333
V
0,-5.65385818481445
V
-1,0
BOT
0,44.3396666666667
V
0,-5.64956665039063
V
-1,0
BOT
0,44.3463333333333
V
0,-5.6462287902832
V
-1,0
BOT
0,44.353
V
0,-5.64432144165039
V
-1,0
BOT
0,44.3596666666667
V
0,-5.6452751159668
V
-1,0
BOT
0,44.3663333333333
V
0,-5.65195083618164
V
-1,0
BOT
0,44.373
V
0,-5.66005706787109
V
-1,0
BOT
0,44.3796666666667
V
0,-5.66673278808594
V
-1,0
BOT
0,44.3863333333333
V
0,-5.67102432250977
V
-1,0
BOT
0,44.393
V
0,-5.67340850830078
V
-1,0
BOT
0,44.3996666666667
V
0,-5.67340850830078
V
-1,0
BOT
0,44.4063333333333
V
0,-5.66864013671875
V
-1,0
BOT
0,44.413
V
0,-5.66387176513672
V
-1,0
BOT
0,44.4196666666667
V
0,-5.66196441650391
V
-1,0
BOT
0,44.4263333333333
V
0,-5.6610107421875
V
-1,0
BOT
0,44.433
V
0,-5.65862655639648
V
-1,0
BOT
0,44.4396666666667
V
0,-5.65624237060547
V
-1,0
BOT
0,44.4463333333333
V
0,-5.65433502197266
V
-1,0
BOT
0,44.453
V
0,-5.65528869628906
V
-1,0
BOT
0,44.4596666666667
V
0,-5.65671920776367
V
-1,0
BOT
0,44.4663333333333
V
0,-5.65814971923828
V
-1,0
BOT
0,44.473
V
0,-5.6614875793457
V
-1,0
BOT
0,44.4796666666667
V
0,-5.66625595092773
V
-1,0
BOT
0,44.4863333333333
V
0,-5.67340850830078
V
-1,0
BOT
0,44.493
V
0,-5.67865371704102
V
-1,0
BOT
0,44.4996666666667
V
0,-5.68151473999023
V
-1,0
BOT
0,44.5063333333333
V
0,-5.68342208862305
V
-1,0
BOT
0,44.513
V
0,-5.68485260009766
V
-1,0
BOT
0,44.5196666666667
V
0,-5.68675994873047
V
-1,0
BOT
0,44.5263333333333
V
0,-5.68723678588867
V
-1,0
BOT
0,44.533
V
0,-5.68628311157227
V
-1,0
BOT
0,44.5396666666667
V
0,-5.68389892578125
V
-1,0
BOT
0,44.5463333333333
V
0,-5.68199157714844
V
-1,0
BOT
0,44.553
V
0,-5.68103790283203
V
-1,0
BOT
0,44.5596666666667
V
0,-5.68294525146484
V
-1,0
BOT
0,44.5663333333333
V
0,-5.68580627441406
V
-1,0
BOT
0,44.573
V
0,-5.68819046020508
V
-1,0
BOT
0,44.5796666666667
V
0,-5.6910514831543
V
-1,0
BOT
0,44.5863333333333
V
0,-5.69391250610352
V
-1,0
BOT
0,44.593
V
0,-5.69677352905273
V
-1,0
BOT
0,44.5996666666667
V
0,-5.69677352905273
V
-1,0
BOT
0,44.6063333333333
V
0,-5.69391250610352
V
-1,0
BOT
0,44.613
V
0,-5.69248199462891
V
-1,0
BOT
0,44.6196666666667
V
0,-5.69438934326172
V
-1,0
BOT
0,44.6263333333333
V
0,-5.69868087768555
V
-1,0
BOT
0,44.633
V
0,-5.70297241210938
V
-1,0
BOT
0,44.6396666666667
V
0,-5.7072639465332
V
-1,0
BOT
0,44.6463333333333
V
0,-5.71346282958984
V
-1,0
BOT
0,44.653
V
0,-5.72061538696289
V
-1,0
BOT
0,44.6596666666667
V
0,-5.72538375854492
V
-1,0
BOT
0,44.6663333333333
V
0,-5.72776794433594
V
-1,0
BOT
0,44.673
V
0,-5.73158264160156
V
-1,0
BOT
0,44.6796666666667
V
0,-5.73635101318359
V
-1,0
BOT
0,44.6863333333333
V
0,-5.74111938476563
V
-1,0
BOT
0,44.693
V
0,-5.74588775634766
V
-1,0
BOT
0,44.6996666666667
V
0,-5.75065612792969
V
-1,0
BOT
0,44.7063333333333
V
0,-5.75733184814453
V
-1,0
BOT
0,44.713
V
0,-5.76257705688477
V
-1,0
BOT
0,44.7196666666667
V
0,-5.76639175415039
V
-1,0
BOT
0,44.7263333333333
V
0,-5.7673454284668
V
-1,0
BOT
0,44.733
V
0,-5.7673454284668
V
-1,0
BOT
0,44.7396666666667
V
0,-5.76925277709961
V
-1,0
BOT
0,44.7463333333333
V
0,-5.77545166015625
V
-1,0
BOT
0,44.753
V
0,-5.78594207763672
V
-1,0
BOT
0,44.7596666666667
V
0,-5.79738616943359
V
-1,0
BOT
0,44.7663333333333
V
0,-5.80787658691406
V
-1,0
BOT
0,44.773
V
0,-5.81645965576172
V
-1,0
BOT
0,44.7796666666667
V
0,-5.82170486450195
V
-1,0
BOT
0,44.7863333333333
V
0,-5.82265853881836
V
-1,0
BOT
0,44.793
V
0,-5.81932067871094
V
-1,0
BOT
0,44.7996666666667
V
0,-5.81455230712891
V
-1,0
BOT
0,44.8063333333333
V
0,-5.81264495849609
V
-1,0
BOT
0,44.813
V
0,-5.8135986328125
V
-1,0
BOT
0,44.8196666666667
V
0,-5.81645965576172
V
-1,0
BOT
0,44.8263333333333
V
0,-5.81789016723633
V
-1,0
BOT
0,44.833
V
0,-5.81741333007813
V
-1,0
BOT
0,44.8396666666667
V
0,-5.81455230712891
V
-1,0
BOT
0,44.8463333333333
V
0,-5.81026077270508
V
-1,0
BOT
0,44.853
V
0,-5.80453872680664
V
-1,0
BOT
0,44.8596666666667
V
0,-5.79690933227539
V
-1,0
BOT
0,44.8663333333333
V
0,-5.78927993774414
V
-1,0
BOT
0,44.873
V
0,-5.78451156616211
V
-1,0
BOT
0,44.8796666666667
V
0,-5.7826042175293
V
-1,0
BOT
0,44.8863333333333
V
0,-5.78069686889648
V
-1,0
BOT
0,44.893
V
0,-5.77878952026367
V
-1,0
BOT
0,44.8996666666667
V
0,-5.77831268310547
V
-1,0
BOT
0,44.9063333333333
V
0,-5.77783584594727
V
-1,0
BOT
0,44.913
V
0,-5.77449798583984
V
-1,0
BOT
0,44.9196666666667
V
0,-5.77020645141602
V
-1,0
BOT
0,44.9263333333333
V
0,-5.76686859130859
V
-1,0
BOT
0,44.933
V
0,-5.76448440551758
V
-1,0
BOT
0,44.9396666666667
V
0,-5.75923919677734
V
-1,0
BOT
0,44.9463333333333
V
0,-5.7530403137207
V
-1,0
BOT
0,44.953
V
0,-5.74827194213867
V
-1,0
BOT
0,44.9596666666667
V
0,-5.74350357055664
V
-1,0
BOT
0,44.9663333333333
V
0,-5.7373046875
V
-1,0
BOT
0,44.973
V
0,-5.72919845581055
V
-1,0
BOT
0,44.9796666666667
V
0,-5.7220458984375
V
-1,0
BOT
0,44.9863333333333
V
0,-5.71632385253906
V
-1,0
BOT
0,44.993
V
0,-5.71012496948242
V
-1,0
BOT
0,44.9996666666667
V
0,-5.70392608642578
V
-1,0
BOT
0,45.0063333333333
V
0,-5.69915771484375
V
-1,0
BOT
0,45.013
V
0,-5.69677352905273
V
-1,0
BOT
0,45.0196666666667
V
0,-5.69534301757813
V
-1,0
BOT
0,45.0263333333333
V
0,-5.69486618041992
V
-1,0
BOT
0,45.033
V
0,-5.69581985473633
V
-1,0
BOT
0,45.0396666666667
V
0,-5.69868087768555
V
-1,0
BOT
0,45.0463333333333
V
0,-5.70011138916016
V
-1,0
BOT
0,45.053
V
0,-5.69963455200195
V
-1,0
BOT
0,45.0596666666667
V
0,-5.69868087768555
V
-1,0
BOT
0,45.0663333333333
V
0,-5.69820404052734
V
-1,0
BOT
0,45.073
V
0,-5.69581985473633
V
-1,0
BOT
0,45.0796666666667
V
0,-5.69057464599609
V
-1,0
BOT
0,45.0863333333333
V
0,-5.68437576293945
V
-1,0
BOT
0,45.093
V
0,-5.68056106567383
V
-1,0
BOT
0,45.0996666666667
V
0,-5.67722320556641
V
-1,0
BOT
0,45.1063333333333
V
0,-5.67197799682617
V
-1,0
BOT
0,45.113
V
0,-5.66673278808594
V
-1,0
BOT
0,45.1196666666667
V
0,-5.66387176513672
V
-1,0
BOT
0,45.1263333333333
V
0,-5.66387176513672
V
-1,0
BOT
0,45.133
V
0,-5.66291809082031
V
-1,0
BOT
0,45.1396666666667
V
0,-5.66005706787109
V
-1,0
BOT
0,45.1463333333333
V
0,-5.65767288208008
V
-1,0
BOT
0,45.153
V
0,-5.65528869628906
V
-1,0
BOT
0,45.1596666666667
V
0,-5.65147399902344
V
-1,0
BOT
0,45.1663333333333
V
0,-5.64670562744141
V
-1,0
BOT
0,45.173
V
0,-5.64336776733398
V
-1,0
BOT
0,45.1796666666667
V
0,-5.64479827880859
V
-1,0
BOT
0,45.1863333333333
V
0,-5.64956665039063
V
-1,0
BOT
0,45.193
V
0,-5.65481185913086
V
-1,0
BOT
0,45.1996666666667
V
0,-5.66005706787109
V
-1,0
BOT
0,45.2063333333333
V
0,-5.66434860229492
V
-1,0
BOT
0,45.213
V
0,-5.66816329956055
V
-1,0
BOT
0,45.2196666666667
V
0,-5.67102432250977
V
-1,0
BOT
0,45.2263333333333
V
0,-5.67388534545898
V
-1,0
BOT
0,45.233
V
0,-5.67913055419922
V
-1,0
BOT
0,45.2396666666667
V
0,-5.68723678588867
V
-1,0
BOT
0,45.2463333333333
V
0,-5.69820404052734
V
-1,0
BOT
0,45.253
V
0,-5.70869445800781
V
-1,0
BOT
0,45.2596666666667
V
0,-5.71632385253906
V
-1,0
BOT
0,45.2663333333333
V
0,-5.7225227355957
V
-1,0
BOT
0,45.273
V
0,-5.72919845581055
V
-1,0
BOT
0,45.2796666666667
V
0,-5.7377815246582
V
-1,0
BOT
0,45.2863333333333
V
0,-5.74541091918945
V
-1,0
BOT
0,45.293
V
0,-5.7530403137207
V
-1,0
BOT
0,45.2996666666667
V
0,-5.76305389404297
V
-1,0
BOT
0,45.3063333333333
V
0,-5.77449798583984
V
-1,0
BOT
0,45.313
V
0,-5.78546524047852
V
-1,0
BOT
0,45.3196666666667
V
0,-5.79643249511719
V
-1,0
BOT
0,45.3263333333333
V
0,-5.80883026123047
V
-1,0
BOT
0,45.333
V
0,-5.81979751586914
V
-1,0
BOT
0,45.3396666666667
V
0,-5.828857421875
V
-1,0
BOT
0,45.3463333333333
V
0,-5.83744049072266
V
-1,0
BOT
0,45.353
V
0,-5.8441162109375
V
-1,0
BOT
0,45.3596666666667
V
0,-5.84888458251953
V
-1,0
BOT
0,45.3663333333333
V
0,-5.85174560546875
V
-1,0
BOT
0,45.373
V
0,-5.85365295410156
V
-1,0
BOT
0,45.3796666666667
V
0,-5.85412979125977
V
-1,0
BOT
0,45.3863333333333
V
0,-5.85317611694336
V
-1,0
BOT
0,45.393
V
0,-5.84983825683594
V
-1,0
BOT
0,45.3996666666667
V
0,-5.84602355957031
V
-1,0
BOT
0,45.4063333333333
V
0,-5.84125518798828
V
-1,0
BOT
0,45.413
V
0,-5.83791732788086
V
-1,0
BOT
0,45.4196666666667
V
0,-5.83600997924805
V
-1,0
BOT
0,45.4263333333333
V
0,-5.83600997924805
V
-1,0
BOT
0,45.433
V
0,-5.83648681640625
V
-1,0
BOT
0,45.4396666666667
V
0,-5.83553314208984
V
-1,0
BOT
0,45.4463333333333
V
0,-5.83410263061523
V
-1,0
BOT
0,45.453
V
0,-5.83124160766602
V
-1,0
BOT
0,45.4596666666667
V
0,-5.83028793334961
V
-1,0
BOT
0,45.4663333333333
V
0,-5.82742691040039
V
-1,0
BOT
0,45.473
V
0,-5.82218170166016
V
-1,0
BOT
0,45.4796666666667
V
0,-5.81502914428711
V
-1,0
BOT
0,45.4863333333333
V
0,-5.80883026123047
V
-1,0
BOT
0,45.493
V
0,-5.80549240112305
V
-1,0
BOT
0,45.4996666666667
V
0,-5.80167770385742
V
-1,0
BOT
0,45.5063333333333
V
0,-5.7978630065918
V
-1,0
BOT
0,45.513
V
0,-5.79261779785156
V
-1,0
BOT
0,45.5196666666667
V
0,-5.78784942626953
V
-1,0
BOT
0,45.5263333333333
V
0,-5.78451156616211
V
-1,0
BOT
0,45.533
V
0,-5.78212738037109
V
-1,0
BOT
0,45.5396666666667
V
0,-5.78022003173828
V
-1,0
BOT
0,45.5463333333333
V
0,-5.77878952026367
V
-1,0
BOT
0,45.553
V
0,-5.77878952026367
V
-1,0
BOT
0,45.5596666666667
V
0,-5.78117370605469
V
-1,0
BOT
0,45.5663333333333
V
0,-5.7835578918457
V
-1,0
BOT
0,45.573
V
0,-5.78403472900391
V
-1,0
BOT
0,45.5796666666667
V
0,-5.78212738037109
V
-1,0
BOT
0,45.5863333333333
V
0,-5.78022003173828
V
-1,0
BOT
0,45.593
V
0,-5.77974319458008
V
-1,0
BOT
0,45.5996666666667
V
0,-5.77831268310547
V
-1,0
BOT
0,45.6063333333333
V
0,-5.77449798583984
V
-1,0
BOT
0,45.613
V
0,-5.77020645141602
V
-1,0
BOT
0,45.6196666666667
V
0,-5.76877593994141
V
-1,0
BOT
0,45.6263333333333
V
0,-5.77020645141602
V
-1,0
BOT
0,45.633
V
0,-5.77163696289063
V
-1,0
BOT
0,45.6396666666667
V
0,-5.77211380004883
V
-1,0
BOT
0,45.6463333333333
V
0,-5.77163696289063
V
-1,0
BOT
0,45.653
V
0,-5.7682991027832
V
-1,0
BOT
0,45.6596666666667
V
0,-5.76162338256836
V
-1,0
BOT
0,45.6663333333333
V
0,-5.75160980224609
V
-1,0
BOT
0,45.673
V
0,-5.74254989624023
V
-1,0
BOT
0,45.6796666666667
V
0,-5.73492050170898
V
-1,0
BOT
0,45.6863333333333
V
0,-5.72776794433594
V
-1,0
BOT
0,45.693
V
0,-5.72109222412109
V
-1,0
BOT
0,45.6996666666667
V
0,-5.71393966674805
V
-1,0
BOT
0,45.7063333333333
V
0,-5.7063102722168
V
-1,0
BOT
0,45.713
V
0,-5.69629669189453
V
-1,0
BOT
0,45.7196666666667
V
0,-5.68675994873047
V
-1,0
BOT
0,45.7263333333333
V
0,-5.68008422851563
V
-1,0
BOT
0,45.733
V
0,-5.6767463684082
V
-1,0
BOT
0,45.7396666666667
V
0,-5.6757926940918
V
-1,0
BOT
0,45.7463333333333
V
0,-5.67388534545898
V
-1,0
BOT
0,45.753
V
0,-5.67007064819336
V
-1,0
BOT
0,45.7596666666667
V
0,-5.66291809082031
V
-1,0
BOT
0,45.7663333333333
V
0,-5.65290451049805
V
-1,0
BOT
0,45.773
V
0,-5.63955307006836
V
-1,0
BOT
0,45.7796666666667
V
0,-5.62477111816406
V
-1,0
BOT
0,45.7863333333333
V
0,-5.60998916625977
V
-1,0
BOT
0,45.793
V
0,-5.59711456298828
V
-1,0
BOT
0,45.7996666666667
V
0,-5.58662414550781
V
-1,0
BOT
0,45.8063333333333
V
0,-5.57613372802734
V
-1,0
BOT
0,45.813
V
0,-5.56659698486328
V
-1,0
BOT
0,45.8196666666667
V
0,-5.55658340454102
V
-1,0
BOT
0,45.8263333333333
V
0,-5.54418563842773
V
-1,0
BOT
0,45.833
V
0,-5.52749633789063
V
-1,0
BOT
0,45.8396666666667
V
0,-5.50985336303711
V
-1,0
BOT
0,45.8463333333333
V
0,-5.4926872253418
V
-1,0
BOT
0,45.853
V
0,-5.47313690185547
V
-1,0
BOT
0,45.8596666666667
V
0,-5.44881820678711
V
-1,0
BOT
0,45.8663333333333
V
0,-5.42306900024414
V
-1,0
BOT
0,45.873
V
0,-5.39827346801758
V
-1,0
BOT
0,45.8796666666667
V
0,-5.37300109863281
V
-1,0
BOT
0,45.8863333333333
V
0,-5.34391403198242
V
-1,0
BOT
0,45.893
V
0,-5.3105354309082
V
-1,0
BOT
0,45.8996666666667
V
0,-5.27811050415039
V
-1,0
BOT
0,45.9063333333333
V
0,-5.24711608886719
V
-1,0
BOT
0,45.913
V
0,-5.21612167358398
V
-1,0
BOT
0,45.9196666666667
V
0,-5.18321990966797
V
-1,0
BOT
0,45.9263333333333
V
0,-5.14936447143555
V
-1,0
BOT
0,45.933
V
0,-5.11741638183594
V
-1,0
BOT
0,45.9396666666667
V
0,-5.08451461791992
V
-1,0
BOT
0,45.9463333333333
V
0,-5.04922866821289
V
-1,0
BOT
0,45.953
V
0,-5.01251220703125
V
-1,0
BOT
0,45.9596666666667
V
0,-4.9738883972168
V
-1,0
BOT
0,45.9663333333333
V
0,-4.93335723876953
V
-1,0
BOT
0,45.973
V
0,-4.89234924316406
V
-1,0
BOT
0,45.9796666666667
V
0,-4.8527717590332
V
-1,0
BOT
0,45.9863333333333
V
0,-4.81128692626953
V
-1,0
BOT
0,45.993
V
0,-4.76694107055664
V
-1,0
BOT
0,45.9996666666667
V
0,-4.72307205200195
V
-1,0
BOT
0,46.0063333333333
V
0,-4.6849250793457
V
-1,0
BOT
0,46.013
V
0,-4.64963912963867
V
-1,0
BOT
0,46.0196666666667
V
0,-4.61292266845703
V
-1,0
BOT
0,46.0263333333333
V
0,-4.57525253295898
V
-1,0
BOT
0,46.033
V
0,-4.53710556030273
V
-1,0
BOT
0,46.0396666666667
V
0,-4.49848175048828
V
-1,0
BOT
0,46.0463333333333
V
0,-4.45842742919922
V
-1,0
BOT
0,46.053
V
0,-4.41646575927734
V
-1,0
BOT
0,46.0596666666667
V
0,-4.37545776367188
V
-1,0
BOT
0,46.0663333333333
V
0,-4.33635711669922
V
-1,0
BOT
0,46.073
V
0,-4.30154800415039
V
-1,0
BOT
0,46.0796666666667
V
0,-4.26912307739258
V
-1,0
BOT
0,46.0863333333333
V
0,-4.23955917358398
V
-1,0
BOT
0,46.093
V
0,-4.21333312988281
V
-1,0
BOT
0,46.0996666666667
V
0,-4.18901443481445
V
-1,0
BOT
0,46.1063333333333
V
0,-4.1656494140625
V
-1,0
BOT
0,46.113
V
0,-4.14276123046875
V
-1,0
BOT
0,46.1196666666667
V
0,-4.1203498840332
V
-1,0
BOT
0,46.1263333333333
V
0,-4.09650802612305
V
-1,0
BOT
0,46.133
V
0,-4.07171249389648
V
-1,0
BOT
0,46.1396666666667
V
0,-4.04739379882813
V
-1,0
BOT
0,46.1463333333333
V
0,-4.02545928955078
V
-1,0
BOT
0,46.153
V
0,-4.00495529174805
V
-1,0
BOT
0,46.1596666666667
V
0,-3.98349761962891
V
-1,0
BOT
0,46.1663333333333
V
0,-3.96251678466797
V
-1,0
BOT
0,46.173
V
0,-3.94248962402344
V
-1,0
BOT
0,46.1796666666667
V
0,-3.92627716064453
V
-1,0
BOT
0,46.1863333333333
V
0,-3.91149520874023
V
-1,0
BOT
0,46.193
V
0,-3.89957427978516
V
-1,0
BOT
0,46.1996666666667
V
0,-3.8909912109375
V
-1,0
BOT
0,46.2063333333333
V
0,-3.88240814208984
V
-1,0
BOT
0,46.213
V
0,-3.87239456176758
V
-1,0
BOT
0,46.2196666666667
V
0,-3.8604736328125
V
-1,0
BOT
0,46.2263333333333
V
0,-3.85046005249023
V
-1,0
BOT
0,46.233
V
0,-3.83901596069336
V
-1,0
BOT
0,46.2396666666667
V
0,-3.83090972900391
V
-1,0
BOT
0,46.2463333333333
V
0,-3.82661819458008
V
-1,0
BOT
0,46.253
V
0,-3.82518768310547
V
-1,0
BOT
0,46.2596666666667
V
0,-3.82232666015625
V
-1,0
BOT
0,46.2663333333333
V
0,-3.81994247436523
V
-1,0
BOT
0,46.273
V
0,-3.82184982299805
V
-1,0
BOT
0,46.2796666666667
V
0,-3.82375717163086
V
-1,0
BOT
0,46.2863333333333
V
0,-3.82137298583984
V
-1,0
BOT
0,46.293
V
0,-3.81755828857422
V
-1,0
BOT
0,46.2996666666667
V
0,-3.81612777709961
V
-1,0
BOT
0,46.3063333333333
V
0,-3.81612777709961
V
-1,0
BOT
0,46.313
V
0,-3.8142204284668
V
-1,0
BOT
0,46.3196666666667
V
0,-3.81374359130859
V
-1,0
BOT
0,46.3263333333333
V
0,-3.81612777709961
V
-1,0
BOT
0,46.333
V
0,-3.82041931152344
V
-1,0
BOT
0,46.3396666666667
V
0,-3.82375717163086
V
-1,0
BOT
0,46.3463333333333
V
0,-3.82709503173828
V
-1,0
BOT
0,46.353
V
0,-3.8294792175293
V
-1,0
BOT
0,46.3596666666667
V
0,-3.83186340332031
V
-1,0
BOT
0,46.3663333333333
V
0,-3.83663177490234
V
-1,0
BOT
0,46.373
V
0,-3.84187698364258
V
-1,0
BOT
0,46.3796666666667
V
0,-3.84902954101562
V
-1,0
BOT
0,46.3863333333333
V
0,-3.85475158691406
V
-1,0
BOT
0,46.393
V
0,-3.8609504699707
V
-1,0
BOT
0,46.3996666666667
V
0,-3.86667251586914
V
-1,0
BOT
0,46.4063333333333
V
0,-3.87287139892578
V
-1,0
BOT
0,46.413
V
0,-3.88145446777344
V
-1,0
BOT
0,46.4196666666667
V
0,-3.89242172241211
V
-1,0
BOT
0,46.4263333333333
V
0,-3.90529632568359
V
-1,0
BOT
0,46.433
V
0,-3.92007827758789
V
-1,0
BOT
0,46.4396666666667
V
0,-3.9362907409668
V
-1,0
BOT
0,46.4463333333333
V
0,-3.95345687866211
V
-1,0
BOT
0,46.453
V
0,-3.96919250488281
V
-1,0
BOT
0,46.4596666666667
V
0,-3.98492813110352
V
-1,0
BOT
0,46.4663333333333
V
0,-4.00209426879883
V
-1,0
BOT
0,46.473
V
0,-4.01926040649414
V
-1,0
BOT
0,46.4796666666667
V
0,-4.03738021850586
V
-1,0
BOT
0,46.4863333333333
V
0,-4.05740737915039
V
-1,0
BOT
0,46.493
V
0,-4.08172607421875
V
-1,0
BOT
0,46.4996666666667
V
0,-4.10938262939453
V
-1,0
BOT
0,46.5063333333333
V
0,-4.13751602172852
V
-1,0
BOT
0,46.513
V
0,-4.16707992553711
V
-1,0
BOT
0,46.5196666666667
V
0,-4.19759750366211
V
-1,0
BOT
0,46.5263333333333
V
0,-4.22954559326172
V
-1,0
BOT
0,46.533
V
0,-4.25958633422852
V
-1,0
BOT
0,46.5396666666667
V
0,-4.28628921508789
V
-1,0
BOT
0,46.5463333333333
V
0,-4.31251525878906
V
-1,0
BOT
0,46.553
V
0,-4.34017181396484
V
-1,0
BOT
0,46.5596666666667
V
0,-4.36925888061523
V
-1,0
BOT
0,46.5663333333333
V
0,-4.39691543579102
V
-1,0
BOT
0,46.573
V
0,-4.42409515380859
V
-1,0
BOT
0,46.5796666666667
V
0,-4.45365905761719
V
-1,0
BOT
0,46.5863333333333
V
0,-4.48417663574219
V
-1,0
BOT
0,46.593
V
0,-4.51374053955078
V
-1,0
BOT
0,46.5996666666667
V
0,-4.54139709472656
V
-1,0
BOT
0,46.6063333333333
V
0,-4.56809997558594
V
-1,0
BOT
0,46.613
V
0,-4.59575653076172
V
-1,0
BOT
0,46.6196666666667
V
0,-4.62484359741211
V
-1,0
BOT
0,46.6263333333333
V
0,-4.6539306640625
V
-1,0
BOT
0,46.633
V
0,-4.68301773071289
V
-1,0
BOT
0,46.6396666666667
V
0,-4.71353530883789
V
-1,0
BOT
0,46.6463333333333
V
0,-4.74786758422852
V
-1,0
BOT
0,46.653
V
0,-4.78410720825195
V
-1,0
BOT
0,46.6596666666667
V
0,-4.81748580932617
V
-1,0
BOT
0,46.6663333333333
V
0,-4.84800338745117
V
-1,0
BOT
0,46.673
V
0,-4.87709045410156
V
-1,0
BOT
0,46.6796666666667
V
0,-4.90474700927734
V
-1,0
BOT
0,46.6863333333333
V
0,-4.9290657043457
V
-1,0
BOT
0,46.693
V
0,-4.95147705078125
V
-1,0
BOT
0,46.6996666666667
V
0,-4.974365234375
V
-1,0
BOT
0,46.7063333333333
V
0,-4.99916076660156
V
-1,0
BOT
0,46.713
V
0,-5.02538681030273
V
-1,0
BOT
0,46.7196666666667
V
0,-5.05208969116211
V
-1,0
BOT
0,46.7263333333333
V
0,-5.07831573486328
V
-1,0
BOT
0,46.733
V
0,-5.10644912719727
V
-1,0
BOT
0,46.7396666666667
V
0,-5.13505935668945
V
-1,0
BOT
0,46.7463333333333
V
0,-5.16557693481445
V
-1,0
BOT
0,46.753
V
0,-5.19561767578125
V
-1,0
BOT
0,46.7596666666667
V
0,-5.22565841674805
V
-1,0
BOT
0,46.7663333333333
V
0,-5.25426864624023
V
-1,0
BOT
0,46.773
V
0,-5.28144836425781
V
-1,0
BOT
0,46.7796666666667
V
0,-5.30719757080078
V
-1,0
BOT
0,46.7863333333333
V
0,-5.33246994018555
V
-1,0
BOT
0,46.793
V
0,-5.35869598388672
V
-1,0
BOT
0,46.7996666666667
V
0,-5.38396835327148
V
-1,0
BOT
0,46.8063333333333
V
0,-5.40876388549805
V
-1,0
BOT
0,46.813
V
0,-5.43117523193359
V
-1,0
BOT
0,46.8196666666667
V
0,-5.45167922973633
V
-1,0
BOT
0,46.8263333333333
V
0,-5.47361373901367
V
-1,0
BOT
0,46.833
V
0,-5.49745559692383
V
-1,0
BOT
0,46.8396666666667
V
0,-5.52177429199219
V
-1,0
BOT
0,46.8463333333333
V
0,-5.54466247558594
V
-1,0
BOT
0,46.853
V
0,-5.5689811706543
V
-1,0
BOT
0,46.8596666666667
V
0,-5.59473037719727
V
-1,0
BOT
0,46.8663333333333
V
0,-5.61761856079102
V
-1,0
BOT
0,46.873
V
0,-5.63573837280273
V
-1,0
BOT
0,46.8796666666667
V
0,-5.65242767333984
V
-1,0
BOT
0,46.8863333333333
V
0,-5.66911697387695
V
-1,0
BOT
0,46.893
V
0,-5.68532943725586
V
-1,0
BOT
0,46.8996666666667
V
0,-5.69963455200195
V
-1,0
BOT
0,46.9063333333333
V
0,-5.71346282958984
V
-1,0
BOT
0,46.913
V
0,-5.72681427001953
V
-1,0
BOT
0,46.9196666666667
V
0,-5.73921203613281
V
-1,0
BOT
0,46.9263333333333
V
0,-5.7520866394043
V
-1,0
BOT
0,46.933
V
0,-5.76543807983398
V
-1,0
BOT
0,46.9396666666667
V
0,-5.77926635742188
V
-1,0
BOT
0,46.9463333333333
V
0,-5.79214096069336
V
-1,0
BOT
0,46.953
V
0,-5.80358505249023
V
-1,0
BOT
0,46.9596666666667
V
0,-5.81455230712891
V
-1,0
BOT
0,46.9663333333333
V
0,-5.82361221313477
V
-1,0
BOT
0,46.973
V
0,-5.8293342590332
V
-1,0
BOT
0,46.9796666666667
V
0,-5.83410263061523
V
-1,0
BOT
0,46.9863333333333
V
0,-5.84030151367188
V
-1,0
BOT
0,46.993
V
0,-5.84506988525391
V
-1,0
BOT
0,46.9996666666667
V
0,-5.84793090820313
V
-1,0
BOT
0,47.0063333333333
V
0,-5.85031509399414
V
-1,0
BOT
0,47.013
V
0,-5.85222244262695
V
-1,0
BOT
0,47.0196666666667
V
0,-5.85269927978516
V
-1,0
BOT
0,47.0263333333333
V
0,-5.85031509399414
V
-1,0
BOT
0,47.033
V
0,-5.84888458251953
V
-1,0
BOT
0,47.0396666666667
V
0,-5.84840774536133
V
-1,0
BOT
0,47.0463333333333
V
0,-5.84650039672852
V
-1,0
BOT
0,47.053
V
0,-5.8436393737793
V
-1,0
BOT
0,47.0596666666667
V
0,-5.84030151367188
V
-1,0
BOT
0,47.0663333333333
V
0,-5.83505630493164
V
-1,0
BOT
0,47.073
V
0,-5.82790374755859
V
-1,0
BOT
0,47.0796666666667
V
0,-5.81884384155273
V
-1,0
BOT
0,47.0863333333333
V
0,-5.80930709838867
V
-1,0
BOT
0,47.093
V
0,-5.80167770385742
V
-1,0
BOT
0,47.0996666666667
V
0,-5.79595565795898
V
-1,0
BOT
0,47.1063333333333
V
0,-5.79214096069336
V
-1,0
BOT
0,47.113
V
0,-5.79023361206055
V
-1,0
BOT
0,47.1196666666667
V
0,-5.78784942626953
V
-1,0
BOT
0,47.1263333333333
V
0,-5.7830810546875
V
-1,0
BOT
0,47.133
V
0,-5.77640533447266
V
-1,0
BOT
0,47.1396666666667
V
0,-5.7673454284668
V
-1,0
BOT
0,47.1463333333333
V
0,-5.75637817382813
V
-1,0
BOT
0,47.153
V
0,-5.74350357055664
V
-1,0
BOT
0,47.1596666666667
V
0,-5.73062896728516
V
-1,0
BOT
0,47.1663333333333
V
0,-5.71966171264648
V
-1,0
BOT
0,47.173
V
0,-5.70964813232422
V
-1,0
BOT
0,47.1796666666667
V
0,-5.70201873779297
V
-1,0
BOT
0,47.1863333333333
V
0,-5.69486618041992
V
-1,0
BOT
0,47.193
V
0,-5.68771362304688
V
-1,0
BOT
0,47.1996666666667
V
0,-5.68103790283203
V
-1,0
BOT
0,47.2063333333333
V
0,-5.67293167114258
V
-1,0
BOT
0,47.213
V
0,-5.66387176513672
V
-1,0
BOT
0,47.2196666666667
V
0,-5.65338134765625
V
-1,0
BOT
0,47.2263333333333
V
0,-5.6452751159668
V
-1,0
BOT
0,47.233
V
0,-5.64050674438477
V
-1,0
BOT
0,47.2396666666667
V
0,-5.63526153564453
V
-1,0
BOT
0,47.2463333333333
V
0,-5.62763214111328
V
-1,0
BOT
0,47.253
V
0,-5.61904907226563
V
-1,0
BOT
0,47.2596666666667
V
0,-5.60951232910156
V
-1,0
BOT
0,47.2663333333333
V
0,-5.59711456298828
V
-1,0
BOT
0,47.273
V
0,-5.58185577392578
V
-1,0
BOT
0,47.2796666666667
V
0,-5.56612014770508
V
-1,0
BOT
0,47.2863333333333
V
0,-5.55324554443359
V
-1,0
BOT
0,47.293
V
0,-5.54370880126953
V
-1,0
BOT
0,47.2996666666667
V
0,-5.53560256958008
V
-1,0
BOT
0,47.3063333333333
V
0,-5.52701950073242
V
-1,0
BOT
0,47.313
V
0,-5.51700592041016
V
-1,0
BOT
0,47.3196666666667
V
0,-5.5079460144043
V
-1,0
BOT
0,47.3263333333333
V
0,-5.49888610839844
V
-1,0
BOT
0,47.333
V
0,-5.48791885375977
V
-1,0
BOT
0,47.3396666666667
V
0,-5.47647476196289
V
-1,0
BOT
0,47.3463333333333
V
0,-5.46550750732422
V
-1,0
BOT
0,47.353
V
0,-5.45692443847656
V
-1,0
BOT
0,47.3596666666667
V
0,-5.44643402099609
V
-1,0
BOT
0,47.3663333333333
V
0,-5.43594360351563
V
-1,0
BOT
0,47.373
V
0,-5.42736053466797
V
-1,0
BOT
0,47.3796666666667
V
0,-5.42020797729492
V
-1,0
BOT
0,47.3863333333333
V
0,-5.41305541992188
V
-1,0
BOT
0,47.393
V
0,-5.40590286254883
V
-1,0
BOT
0,47.3996666666667
V
0,-5.40018081665039
V
-1,0
BOT
0,47.4063333333333
V
0,-5.39588928222656
V
-1,0
BOT
0,47.413
V
0,-5.38969039916992
V
-1,0
BOT
0,47.4196666666667
V
0,-5.37872314453125
V
-1,0
BOT
0,47.4263333333333
V
0,-5.36489486694336
V
-1,0
BOT
0,47.433
V
0,-5.35154342651367
V
-1,0
BOT
0,47.4396666666667
V
0,-5.340576171875
V
-1,0
BOT
0,47.4463333333333
V
0,-5.32960891723633
V
-1,0
BOT
0,47.453
V
0,-5.31721115112305
V
-1,0
BOT
0,47.4596666666667
V
0,-5.30433654785156
V
-1,0
BOT
0,47.4663333333333
V
0,-5.29336929321289
V
-1,0
BOT
0,47.473
V
0,-5.28287887573242
V
-1,0
BOT
0,47.4796666666667
V
0,-5.26809692382813
V
-1,0
BOT
0,47.4863333333333
V
0,-5.25045394897461
V
-1,0
BOT
0,47.493
V
0,-5.2337646484375
V
-1,0
BOT
0,47.4996666666667
V
0,-5.21993637084961
V
-1,0
BOT
0,47.5063333333333
V
0,-5.2032470703125
V
-1,0
BOT
0,47.513
V
0,-5.18226623535156
V
-1,0
BOT
0,47.5196666666667
V
0,-5.1579475402832
V
-1,0
BOT
0,47.5263333333333
V
0,-5.13362884521484
V
-1,0
BOT
0,47.533
V
0,-5.11026382446289
V
-1,0
BOT
0,47.5396666666667
V
0,-5.08832931518555
V
-1,0
BOT
0,47.5463333333333
V
0,-5.06782531738281
V
-1,0
BOT
0,47.553
V
0,-5.04827499389648
V
-1,0
BOT
0,47.5596666666667
V
0,-5.03110885620117
V
-1,0
BOT
0,47.5663333333333
V
0,-5.01298904418945
V
-1,0
BOT
0,47.573
V
0,-4.99153137207031
V
-1,0
BOT
0,47.5796666666667
V
0,-4.96435165405273
V
-1,0
BOT
0,47.5863333333333
V
0,-4.93526458740234
V
-1,0
BOT
0,47.593
V
0,-4.90522384643555
V
-1,0
BOT
0,47.5996666666667
V
0,-4.87184524536133
V
-1,0
BOT
0,47.6063333333333
V
0,-4.8365592956543
V
-1,0
BOT
0,47.613
V
0,-4.79936599731445
V
-1,0
BOT
0,47.6196666666667
V
0,-4.7602653503418
V
-1,0
BOT
0,47.6263333333333
V
0,-4.71878051757813
V
-1,0
BOT
0,47.633
V
0,-4.67443466186523
V
-1,0
BOT
0,47.6396666666667
V
0,-4.62770462036133
V
-1,0
BOT
0,47.6463333333333
V
0,-4.57620620727539
V
-1,0
BOT
0,47.653
V
0,-4.52184677124023
V
-1,0
BOT
0,47.6596666666667
V
0,-4.46605682373047
V
-1,0
BOT
0,47.6663333333333
V
0,-4.40692901611328
V
-1,0
BOT
0,47.673
V
0,-4.34494018554688
V
-1,0
BOT
0,47.6796666666667
V
0,-4.28009033203125
V
-1,0
BOT
0,47.6863333333333
V
0,-4.21237945556641
V
-1,0
BOT
0,47.693
V
0,-4.14276123046875
V
-1,0
BOT
0,47.6996666666667
V
0,-4.07028198242188
V
-1,0
BOT
0,47.7063333333333
V
0,-3.99494171142578
V
-1,0
BOT
0,47.713
V
0,-3.91530990600586
V
-1,0
BOT
0,47.7196666666667
V
0,-3.83234024047852
V
-1,0
BOT
0,47.7263333333333
V
0,-3.74794006347656
V
-1,0
BOT
0,47.733
V
0,-3.6625862121582
V
-1,0
BOT
0,47.7396666666667
V
0,-3.57675552368164
V
-1,0
BOT
0,47.7463333333333
V
0,-3.49044799804687
V
-1,0
BOT
0,47.753
V
0,-3.40652465820312
V
-1,0
BOT
0,47.7596666666667
V
0,-3.32546234130859
V
-1,0
BOT
0,47.7663333333333
V
0,-3.24726104736328
V
-1,0
BOT
0,47.773
V
0,-3.17239761352539
V
-1,0
BOT
0,47.7796666666667
V
0,-3.10134887695312
V
-1,0
BOT
0,47.7863333333333
V
0,-3.03363800048828
V
-1,0
BOT
0,47.793
V
0,-2.96783447265625
V
-1,0
BOT
0,47.7996666666667
V
0,-2.90584564208984
V
-1,0
BOT
0,47.8063333333333
V
0,-2.84910202026367
V
-1,0
BOT
0,47.813
V
0,-2.79426574707031
V
-1,0
BOT
0,47.8196666666667
V
0,-2.74276733398437
V
-1,0
BOT
0,47.8263333333333
V
0,-2.69842147827148
V
-1,0
BOT
0,47.833
V
0,-2.66361236572266
V
-1,0
BOT
0,47.8396666666667
V
0,-2.63690948486328
V
-1,0
BOT
0,47.8463333333333
V
0,-2.61640548706055
V
-1,0
BOT
0,47.853
V
0,-2.60353088378906
V
-1,0
BOT
0,47.8596666666667
V
0,-2.59685516357422
V
-1,0
BOT
0,47.8663333333333
V
0,-2.59494781494141
V
-1,0
BOT
0,47.873
V
0,-2.59637832641602
V
-1,0
BOT
0,47.8796666666667
V
0,-2.60400772094727
V
-1,0
BOT
0,47.8863333333333
V
0,-2.61878967285156
V
-1,0
BOT
0,47.893
V
0,-2.64310836791992
V
-1,0
BOT
0,47.8996666666667
V
0,-2.67648696899414
V
-1,0
BOT
0,47.9063333333333
V
0,-2.71797180175781
V
-1,0
BOT
0,47.913
V
0,-2.76422500610352
V
-1,0
BOT
0,47.9196666666667
V
0,-2.81429290771484
V
-1,0
BOT
0,47.9263333333333
V
0,-2.86769866943359
V
-1,0
BOT
0,47.933
V
0,-2.92587280273437
V
-1,0
BOT
0,47.9396666666667
V
0,-2.98786163330078
V
-1,0
BOT
0,47.9463333333333
V
0,-3.05271148681641
V
-1,0
BOT
0,47.953
V
0,-3.12328338623047
V
-1,0
BOT
0,47.9596666666667
V
0,-3.19910049438477
V
-1,0
BOT
0,47.9663333333333
V
0,-3.27920913696289
V
-1,0
BOT
0,47.973
V
0,-3.35979461669922
V
-1,0
BOT
0,47.9796666666667
V
0,-3.43942642211914
V
-1,0
BOT
0,47.9863333333333
V
0,-3.51715087890625
V
-1,0
BOT
0,47.993
V
0,-3.59249114990234
V
-1,0
BOT
0,47.9996666666667
V
0,-3.66687774658203
V
-1,0
BOT
0,48.0063333333333
V
0,-3.73983383178711
V
-1,0
BOT
0,48.013
V
0,-3.81278991699219
V
-1,0
BOT
0,48.0196666666667
V
0,-3.88860702514648
V
-1,0
BOT
0,48.0263333333333
V
0,-3.96633148193359
V
-1,0
BOT
0,48.033
V
0,-4.0440559387207
V
-1,0
BOT
0,48.0396666666667
V
0,-4.12082672119141
V
-1,0
BOT
0,48.0463333333333
V
0,-4.1956901550293
V
-1,0
BOT
0,48.053
V
0,-4.26626205444336
V
-1,0
BOT
0,48.0596666666667
V
0,-4.33206558227539
V
-1,0
BOT
0,48.0663333333333
V
0,-4.39548492431641
V
-1,0
BOT
0,48.073
V
0,-4.45842742919922
V
-1,0
BOT
0,48.0796666666667
V
0,-4.51946258544922
V
-1,0
BOT
0,48.0863333333333
V
0,-4.57620620727539
V
-1,0
BOT
0,48.093
V
0,-4.63104248046875
V
-1,0
BOT
0,48.0996666666667
V
0,-4.6849250793457
V
-1,0
BOT
0,48.1063333333333
V
0,-4.73403930664063
V
-1,0
BOT
0,48.113
V
0,-4.77743148803711
V
-1,0
BOT
0,48.1196666666667
V
0,-4.81700897216797
V
-1,0
BOT
0,48.1263333333333
V
0,-4.85515594482422
V
-1,0
BOT
0,48.133
V
0,-4.89044189453125
V
-1,0
BOT
0,48.1396666666667
V
0,-4.92191314697266
V
-1,0
BOT
0,48.1463333333333
V
0,-4.95052337646484
V
-1,0
BOT
0,48.153
V
0,-4.97674942016602
V
-1,0
BOT
0,48.1596666666667
V
0,-5.00249862670898
V
-1,0
BOT
0,48.1663333333333
V
0,-5.02777099609375
V
-1,0
BOT
0,48.173
V
0,-5.04922866821289
V
-1,0
BOT
0,48.1796666666667
V
0,-5.06734848022461
V
-1,0
BOT
0,48.1863333333333
V
0,-5.07974624633789
V
-1,0
BOT
0,48.193
V
0,-5.08880615234375
V
-1,0
BOT
0,48.1996666666667
V
0,-5.09357452392578
V
-1,0
BOT
0,48.2063333333333
V
0,-5.09500503540039
V
-1,0
BOT
0,48.213
V
0,-5.096435546875
V
-1,0
BOT
0,48.2196666666667
V
0,-5.09834289550781
V
-1,0
BOT
0,48.2263333333333
V
0,-5.10120391845703
V
-1,0
BOT
0,48.233
V
0,-5.10358810424805
V
-1,0
BOT
0,48.2396666666667
V
0,-5.10501861572266
V
-1,0
BOT
0,48.2463333333333
V
0,-5.10263442993164
V
-1,0
BOT
0,48.253
V
0,-5.09500503540039
V
-1,0
BOT
0,48.2596666666667
V
0,-5.0811767578125
V
-1,0
BOT
0,48.2663333333333
V
0,-5.06448745727539
V
-1,0
BOT
0,48.273
V
0,-5.04636764526367
V
-1,0
BOT
0,48.2796666666667
V
0,-5.02681732177734
V
-1,0
BOT
0,48.2863333333333
V
0,-5.00631332397461
V
-1,0
BOT
0,48.293
V
0,-4.98628616333008
V
-1,0
BOT
0,48.2996666666667
V
0,-4.96768951416016
V
-1,0
BOT
0,48.3063333333333
V
0,-4.94861602783203
V
-1,0
BOT
0,48.313
V
0,-4.9290657043457
V
-1,0
BOT
0,48.3196666666667
V
0,-4.90903854370117
V
-1,0
BOT
0,48.3263333333333
V
0,-4.88662719726563
V
-1,0
BOT
0,48.333
V
0,-4.86230850219727
V
-1,0
BOT
0,48.3396666666667
V
0,-4.83894348144531
V
-1,0
BOT
0,48.3463333333333
V
0,-4.81796264648438
V
-1,0
BOT
0,48.353
V
0,-4.79793548583984
V
-1,0
BOT
0,48.3596666666667
V
0,-4.77838516235352
V
-1,0
BOT
0,48.3663333333333
V
0,-4.7602653503418
V
-1,0
BOT
0,48.373
V
0,-4.74262237548828
V
-1,0
BOT
0,48.3796666666667
V
0,-4.72450256347656
V
-1,0
BOT
0,48.3863333333333
V
0,-4.70304489135742
V
-1,0
BOT
0,48.393
V
0,-4.67824935913086
V
-1,0
BOT
0,48.3996666666667
V
0,-4.65154647827148
V
-1,0
BOT
0,48.4063333333333
V
0,-4.62484359741211
V
-1,0
BOT
0,48.413
V
0,-4.59909439086914
V
-1,0
BOT
0,48.4196666666667
V
0,-4.57286834716797
V
-1,0
BOT
0,48.4263333333333
V
0,-4.5475959777832
V
-1,0
BOT
0,48.433
V
0,-4.52184677124023
V
-1,0
BOT
0,48.4396666666667
V
0,-4.49752807617188
V
-1,0
BOT
0,48.4463333333333
V
0,-4.47273254394531
V
-1,0
BOT
0,48.453
V
0,-4.44746017456055
V
-1,0
BOT
0,48.4596666666667
V
0,-4.42028045654297
V
-1,0
BOT
0,48.4663333333333
V
0,-4.39167022705078
V
-1,0
BOT
0,48.473
V
0,-4.36258316040039
V
-1,0
BOT
0,48.4796666666667
V
0,-4.3339729309082
V
-1,0
BOT
0,48.4863333333333
V
0,-4.30774688720703
V
-1,0
BOT
0,48.493
V
0,-4.28390502929688
V
-1,0
BOT
0,48.4996666666667
V
0,-4.26149368286133
V
-1,0
BOT
0,48.5063333333333
V
0,-4.23860549926758
V
-1,0
BOT
0,48.513
V
0,-4.21714782714844
V
-1,0
BOT
0,48.5196666666667
V
0,-4.1961669921875
V
-1,0
BOT
0,48.5263333333333
V
0,-4.17232513427734
V
-1,0
BOT
0,48.533
V
0,-4.14896011352539
V
-1,0
BOT
0,48.5396666666667
V
0,-4.12940979003906
V
-1,0
BOT
0,48.5463333333333
V
0,-4.11319732666016
V
-1,0
BOT
0,48.553
V
0,-4.09841537475586
V
-1,0
BOT
0,48.5596666666667
V
0,-4.08411026000977
V
-1,0
BOT
0,48.5663333333333
V
0,-4.07171249389648
V
-1,0
BOT
0,48.573
V
0,-4.0593147277832
V
-1,0
BOT
0,48.5796666666667
V
0,-4.04596328735352
V
-1,0
BOT
0,48.5863333333333
V
0,-4.03308868408203
V
-1,0
BOT
0,48.593
V
0,-4.02402877807617
V
-1,0
BOT
0,48.5996666666667
V
0,-4.01687622070313
V
-1,0
BOT
0,48.6063333333333
V
0,-4.01020050048828
V
-1,0
BOT
0,48.613
V
0,-4.00257110595703
V
-1,0
BOT
0,48.6196666666667
V
0,-3.99398803710937
V
-1,0
BOT
0,48.6263333333333
V
0,-3.98445129394531
V
-1,0
BOT
0,48.633
V
0,-3.97348403930664
V
-1,0
BOT
0,48.6396666666667
V
0,-3.96108627319336
V
-1,0
BOT
0,48.6463333333333
V
0,-3.94964218139648
V
-1,0
BOT
0,48.653
V
0,-3.93867492675781
V
-1,0
BOT
0,48.6596666666667
V
0,-3.92723083496094
V
-1,0
BOT
0,48.6663333333333
V
0,-3.91340255737305
V
-1,0
BOT
0,48.673
V
0,-3.89623641967773
V
-1,0
BOT
0,48.6796666666667
V
0,-3.8762092590332
V
-1,0
BOT
0,48.6863333333333
V
0,-3.85427474975586
V
-1,0
BOT
0,48.693
V
0,-3.8304328918457
V
-1,0
BOT
0,48.6996666666667
V
0,-3.80420684814453
V
-1,0
BOT
0,48.7063333333333
V
0,-3.77702713012695
V
-1,0
BOT
0,48.713
V
0,-3.74984741210937
V
-1,0
BOT
0,48.7196666666667
V
0,-3.71980667114258
V
-1,0
BOT
0,48.7263333333333
V
0,-3.68738174438477
V
-1,0
BOT
0,48.733
V
0,-3.65018844604492
V
-1,0
BOT
0,48.7396666666667
V
0,-3.60918045043945
V
-1,0
BOT
0,48.7463333333333
V
0,-3.56578826904297
V
-1,0
BOT
0,48.753
V
0,-3.52096557617187
V
-1,0
BOT
0,48.7596666666667
V
0,-3.47805023193359
V
-1,0
BOT
0,48.7663333333333
V
0,-3.43656539916992
V
-1,0
BOT
0,48.773
V
0,-3.39603424072266
V
-1,0
BOT
0,48.7796666666667
V
0,-3.35693359375
V
-1,0
BOT
0,48.7863333333333
V
0,-3.31735610961914
V
-1,0
BOT
0,48.793
V
0,-3.27777862548828
V
-1,0
BOT
0,48.7996666666667
V
0,-3.23772430419922
V
-1,0
BOT
0,48.8063333333333
V
0,-3.19862365722656
V
-1,0
BOT
0,48.813
V
0,-3.16047668457031
V
-1,0
BOT
0,48.8196666666667
V
0,-3.12089920043945
V
-1,0
BOT
0,48.8263333333333
V
0,-3.08132171630859
V
-1,0
BOT
0,48.833
V
0,-3.04174423217773
V
-1,0
BOT
0,48.8396666666667
V
0,-3.00264358520508
V
-1,0
BOT
0,48.8463333333333
V
0,-2.96401977539062
V
-1,0
BOT
0,48.853
V
0,-2.92730331420898
V
-1,0
BOT
0,48.8596666666667
V
0,-2.89297103881836
V
-1,0
BOT
0,48.8663333333333
V
0,-2.86245346069336
V
-1,0
BOT
0,48.873
V
0,-2.83336639404297
V
-1,0
BOT
0,48.8796666666667
V
0,-2.80427932739258
V
-1,0
BOT
0,48.8863333333333
V
0,-2.77328491210937
V
-1,0
BOT
0,48.893
V
0,-2.74324417114258
V
-1,0
BOT
0,48.8996666666667
V
0,-2.7165412902832
V
-1,0
BOT
0,48.9063333333333
V
0,-2.69269943237305
V
-1,0
BOT
0,48.913
V
0,-2.67124176025391
V
-1,0
BOT
0,48.9196666666667
V
0,-2.65312194824219
V
-1,0
BOT
0,48.9263333333333
V
0,-2.64072418212891
V
-1,0
BOT
0,48.933
V
0,-2.63357162475586
V
-1,0
BOT
0,48.9396666666667
V
0,-2.63071060180664
V
-1,0
BOT
0,48.9463333333333
V
0,-2.62832641601562
V
-1,0
BOT
0,48.953
V
0,-2.63023376464844
V
-1,0
BOT
0,48.9596666666667
V
0,-2.63738632202148
V
-1,0
BOT
0,48.9663333333333
V
0,-2.65026092529297
V
-1,0
BOT
0,48.973
V
0,-2.66599655151367
V
-1,0
BOT
0,48.9796666666667
V
0,-2.685546875
V
-1,0
BOT
0,48.9863333333333
V
0,-2.71034240722656
V
-1,0
BOT
0,48.993
V
0,-2.73752212524414
V
-1,0
BOT
0,48.9996666666667
V
0,-2.76660919189453
V
-1,0
BOT
0,49.0063333333333
V
0,-2.79712677001953
V
-1,0
BOT
0,49.013
V
0,-2.83002853393555
V
-1,0
BOT
0,49.0196666666667
V
0,-2.86531448364258
V
-1,0
BOT
0,49.0263333333333
V
0,-2.90298461914062
V
-1,0
BOT
0,49.033
V
0,-2.94208526611328
V
-1,0
BOT
0,49.0396666666667
V
0,-2.98166275024414
V
-1,0
BOT
0,49.0463333333333
V
0,-3.01933288574219
V
-1,0
BOT
0,49.053
V
0,-3.05747985839844
V
-1,0
BOT
0,49.0596666666667
V
0,-3.0975341796875
V
-1,0
BOT
0,49.0663333333333
V
0,-3.13949584960937
V
-1,0
BOT
0,49.073
V
0,-3.18527221679687
V
-1,0
BOT
0,49.0796666666667
V
0,-3.23295593261719
V
-1,0
BOT
0,49.0863333333333
V
0,-3.28207015991211
V
-1,0
BOT
0,49.093
V
0,-3.33070755004883
V
-1,0
BOT
0,49.0996666666667
V
0,-3.37696075439453
V
-1,0
BOT
0,49.1063333333333
V
0,-3.42130661010742
V
-1,0
BOT
0,49.113
V
0,-3.46231460571289
V
-1,0
BOT
0,49.1196666666667
V
0,-3.50236892700195
V
-1,0
BOT
0,49.1263333333333
V
0,-3.54194641113281
V
-1,0
BOT
0,49.133
V
0,-3.57818603515625
V
-1,0
BOT
0,49.1396666666667
V
0,-3.61013412475586
V
-1,0
BOT
0,49.1463333333333
V
0,-3.63731384277344
V
-1,0
BOT
0,49.153
V
0,-3.66020202636719
V
-1,0
BOT
0,49.1596666666667
V
0,-3.67927551269531
V
-1,0
BOT
0,49.1663333333333
V
0,-3.69405746459961
V
-1,0
BOT
0,49.173
V
0,-3.70693206787109
V
-1,0
BOT
0,49.1796666666667
V
0,-3.71789932250977
V
-1,0
BOT
0,49.1863333333333
V
0,-3.72648239135742
V
-1,0
BOT
0,49.193
V
0,-3.73172760009766
V
-1,0
BOT
0,49.1996666666667
V
0,-3.73458862304687
V
-1,0
BOT
0,49.2063333333333
V
0,-3.73315811157227
V
-1,0
BOT
0,49.213
V
0,-3.72791290283203
V
-1,0
BOT
0,49.2196666666667
V
0,-3.71980667114258
V
-1,0
BOT
0,49.2263333333333
V
0,-3.7074089050293
V
-1,0
BOT
0,49.233
V
0,-3.69167327880859
V
-1,0
BOT
0,49.2396666666667
V
0,-3.67021560668945
V
-1,0
BOT
0,49.2463333333333
V
0,-3.64446640014648
V
-1,0
BOT
0,49.253
V
0,-3.61490249633789
V
-1,0
BOT
0,49.2596666666667
V
0,-3.58438491821289
V
-1,0
BOT
0,49.2663333333333
V
0,-3.55243682861328
V
-1,0
BOT
0,49.273
V
0,-3.51905822753906
V
-1,0
BOT
0,49.2796666666667
V
0,-3.48377227783203
V
-1,0
BOT
0,49.2863333333333
V
0,-3.44514846801758
V
-1,0
BOT
0,49.293
V
0,-3.40414047241211
V
-1,0
BOT
0,49.2996666666667
V
0,-3.35979461669922
V
-1,0
BOT
0,49.3063333333333
V
0,-3.31211090087891
V
-1,0
BOT
0,49.313
V
0,-3.26204299926758
V
-1,0
BOT
0,49.3196666666667
V
0,-3.21245193481445
V
-1,0
BOT
0,49.3263333333333
V
0,-3.16715240478516
V
-1,0
BOT
0,49.333
V
0,-3.12232971191406
V
-1,0
BOT
0,49.3396666666667
V
0,-3.07607650756836
V
-1,0
BOT
0,49.3463333333333
V
0,-3.02934646606445
V
-1,0
BOT
0,49.353
V
0,-2.98261642456055
V
-1,0
BOT
0,49.3596666666667
V
0,-2.93684005737305
V
-1,0
BOT
0,49.3663333333333
V
0,-2.88963317871094
V
-1,0
BOT
0,49.373
V
0,-2.84385681152344
V
-1,0
BOT
0,49.3796666666667
V
0,-2.80189514160156
V
-1,0
BOT
0,49.3863333333333
V
0,-2.76517868041992
V
-1,0
BOT
0,49.393
V
0,-2.7313232421875
V
-1,0
BOT
0,49.3996666666667
V
0,-2.69889831542969
V
-1,0
BOT
0,49.4063333333333
V
0,-2.6702880859375
V
-1,0
BOT
0,49.413
V
0,-2.64453887939453
V
-1,0
BOT
0,49.4196666666667
V
0,-2.62165069580078
V
-1,0
BOT
0,49.4263333333333
V
0,-2.59876251220703
V
-1,0
BOT
0,49.433
V
0,-2.57968902587891
V
-1,0
BOT
0,49.4396666666667
V
0,-2.56490707397461
V
-1,0
BOT
0,49.4463333333333
V
0,-2.55203247070312
V
-1,0
BOT
0,49.453
V
0,-2.54058837890625
V
-1,0
BOT
0,49.4596666666667
V
0,-2.532958984375
V
-1,0
BOT
0,49.4663333333333
V
0,-2.53009796142578
V
-1,0
BOT
0,49.473
V
0,-2.52723693847656
V
-1,0
BOT
0,49.4796666666667
V
0,-2.52342224121094
V
-1,0
BOT
0,49.4863333333333
V
0,-2.52103805541992
V
-1,0
BOT
0,49.493
V
0,-2.52342224121094
V
-1,0
BOT
0,49.4996666666667
V
0,-2.52866744995117
V
-1,0
BOT
0,49.5063333333333
V
0,-2.53677368164062
V
-1,0
BOT
0,49.513
V
0,-2.54917144775391
V
-1,0
BOT
0,49.5196666666667
V
0,-2.56633758544922
V
-1,0
BOT
0,49.5263333333333
V
0,-2.58445739746094
V
-1,0
BOT
0,49.533
V
0,-2.60066986083984
V
-1,0
BOT
0,49.5396666666667
V
0,-2.61640548706055
V
-1,0
BOT
0,49.5463333333333
V
0,-2.63261795043945
V
-1,0
BOT
0,49.553
V
0,-2.64883041381836
V
-1,0
BOT
0,49.5596666666667
V
0,-2.66456604003906
V
-1,0
BOT
0,49.5663333333333
V
0,-2.68220901489258
V
-1,0
BOT
0,49.573
V
0,-2.7008056640625
V
-1,0
BOT
0,49.5796666666667
V
0,-2.72035598754883
V
-1,0
BOT
0,49.5863333333333
V
0,-2.73847579956055
V
-1,0
BOT
0,49.593
V
0,-2.75659561157227
V
-1,0
BOT
0,49.5996666666667
V
0,-2.77423858642578
V
-1,0
BOT
0,49.6063333333333
V
0,-2.7928352355957
V
-1,0
BOT
0,49.613
V
0,-2.81333923339844
V
-1,0
BOT
0,49.6196666666667
V
0,-2.83336639404297
V
-1,0
BOT
0,49.6263333333333
V
0,-2.85434722900391
V
-1,0
BOT
0,49.633
V
0,-2.87485122680664
V
-1,0
BOT
0,49.6396666666667
V
0,-2.89535522460937
V
-1,0
BOT
0,49.6463333333333
V
0,-2.9149055480957
V
-1,0
BOT
0,49.653
V
0,-2.93350219726562
V
-1,0
BOT
0,49.6596666666667
V
0,-2.95066833496094
V
-1,0
BOT
0,49.6663333333333
V
0,-2.96688079833984
V
-1,0
BOT
0,49.673
V
0,-2.98213958740234
V
-1,0
BOT
0,49.6796666666667
V
0,-2.99644470214844
V
-1,0
BOT
0,49.6863333333333
V
0,-3.01027297973633
V
-1,0
BOT
0,49.693
V
0,-3.02410125732422
V
-1,0
BOT
0,49.6996666666667
V
0,-3.03840637207031
V
-1,0
BOT
0,49.7063333333333
V
0,-3.0517578125
V
-1,0
BOT
0,49.713
V
0,-3.06415557861328
V
-1,0
BOT
0,49.7196666666667
V
0,-3.07703018188477
V
-1,0
BOT
0,49.7263333333333
V
0,-3.08895111083984
V
-1,0
BOT
0,49.733
V
0,-3.10039520263672
V
-1,0
BOT
0,49.7396666666667
V
0,-3.11136245727539
V
-1,0
BOT
0,49.7463333333333
V
0,-3.12423706054687
V
-1,0
BOT
0,49.753
V
0,-3.13806533813477
V
-1,0
BOT
0,49.7596666666667
V
0,-3.15093994140625
V
-1,0
BOT
0,49.7663333333333
V
0,-3.16524505615234
V
-1,0
BOT
0,49.773
V
0,-3.17907333374023
V
-1,0
BOT
0,49.7796666666667
V
0,-3.19147109985352
V
-1,0
BOT
0,49.7863333333333
V
0,-3.20291519165039
V
-1,0
BOT
0,49.793
V
0,-3.21531295776367
V
-1,0
BOT
0,49.7996666666667
V
0,-3.22866439819336
V
-1,0
BOT
0,49.8063333333333
V
0,-3.24010848999023
V
-1,0
BOT
0,49.813
V
0,-3.25155258178711
V
-1,0
BOT
0,49.8196666666667
V
0,-3.2649040222168
V
-1,0
BOT
0,49.8263333333333
V
0,-3.27968597412109
V
-1,0
BOT
0,49.833
V
0,-3.29351425170898
V
-1,0
BOT
0,49.8396666666667
V
0,-3.30638885498047
V
-1,0
BOT
0,49.8463333333333
V
0,-3.31974029541016
V
-1,0
BOT
0,49.853
V
0,-3.33213806152344
V
-1,0
BOT
0,49.8596666666667
V
0,-3.3411979675293
V
-1,0
BOT
0,49.8663333333333
V
0,-3.35025787353516
V
-1,0
BOT
0,49.873
V
0,-3.36074829101562
V
-1,0
BOT
0,49.8796666666667
V
0,-3.37123870849609
V
-1,0
BOT
0,49.8863333333333
V
0,-3.38077545166016
V
-1,0
BOT
0,49.893
V
0,-3.39031219482422
V
-1,0
BOT
0,49.8996666666667
V
0,-3.39841842651367
V
-1,0
BOT
0,49.9063333333333
V
0,-3.40366363525391
V
-1,0
BOT
0,49.913
V
0,-3.40414047241211
V
-1,0
BOT
0,49.9196666666667
V
0,-3.40175628662109
V
-1,0
BOT
0,49.9263333333333
V
0,-3.39889526367187
V
-1,0
BOT
0,49.933
V
0,-3.39555740356445
V
-1,0
BOT
0,49.9396666666667
V
0,-3.39412689208984
V
-1,0
BOT
0,49.9463333333333
V
0,-3.39269638061523
V
-1,0
BOT
0,49.953
V
0,-3.39174270629883
V
-1,0
BOT
0,49.9596666666667
V
0,-3.39269638061523
V
-1,0
BOT
0,49.9663333333333
V
0,-3.39555740356445
V
-1,0
BOT
0,49.973
V
0,-3.39889526367187
V
-1,0
BOT
0,49.9796666666667
V
0,-3.40032577514648
V
-1,0
BOT
0,49.9863333333333
V
0,-3.40127944946289
V
-1,0
BOT
0,49.993
V
0,-3.40414047241211
V
-1,0
BOT
0,49.9996666666667
V
0,-3.40890884399414
V
-1,0
BOT
0,50.0063333333334
V
0,-3.41367721557617
V
-1,0
BOT
0,50.013
V
0,-3.4184455871582
V
-1,0
BOT
0,50.0196666666667
V
0,-3.42369079589844
V
-1,0
BOT
0,50.0263333333333
V
0,-3.43036651611328
V
-1,0
BOT
0,50.033
V
0,-3.43847274780273
V
-1,0
BOT
0,50.0396666666667
V
0,-3.44657897949219
V
-1,0
BOT
0,50.0463333333333
V
0,-3.45659255981445
V
-1,0
BOT
0,50.053
V
0,-3.46708297729492
V
-1,0
BOT
0,50.0596666666667
V
0,-3.48043441772461
V
-1,0
BOT
0,50.0663333333334
V
0,-3.49664688110352
V
-1,0
BOT
0,50.073
V
0,-3.51524353027344
V
-1,0
BOT
0,50.0796666666667
V
0,-3.53336334228516
V
-1,0
BOT
0,50.0863333333334
V
0,-3.55148315429687
V
-1,0
BOT
0,50.093
V
0,-3.57246398925781
V
-1,0
BOT
0,50.0996666666667
V
0,-3.59535217285156
V
-1,0
BOT
0,50.1063333333333
V
0,-3.61919403076172
V
-1,0
BOT
0,50.113
V
0,-3.64446640014648
V
-1,0
BOT
0,50.1196666666667
V
0,-3.67212295532227
V
-1,0
BOT
0,50.1263333333333
V
0,-3.70264053344727
V
-1,0
BOT
0,50.133
V
0,-3.73363494873047
V
-1,0
BOT
0,50.1396666666667
V
0,-3.76462936401367
V
-1,0
BOT
0,50.1463333333333
V
0,-3.79562377929687
V
-1,0
BOT
0,50.153
V
0,-3.82661819458008
V
-1,0
BOT
0,50.1596666666667
V
0,-3.85761260986328
V
-1,0
BOT
0,50.1663333333333
V
0,-3.88765335083008
V
-1,0
BOT
0,50.173
V
0,-3.91864776611328
V
-1,0
BOT
0,50.1796666666667
V
0,-3.95059585571289
V
-1,0
BOT
0,50.1863333333333
V
0,-3.98445129394531
V
-1,0
BOT
0,50.193
V
0,-4.01782989501953
V
-1,0
BOT
0,50.1996666666667
V
0,-4.05073165893555
V
-1,0
BOT
0,50.2063333333333
V
0,-4.08411026000977
V
-1,0
BOT
0,50.213
V
0,-4.11701202392578
V
-1,0
BOT
0,50.2196666666667
V
0,-4.14943695068359
V
-1,0
BOT
0,50.2263333333333
V
0,-4.180908203125
V
-1,0
BOT
0,50.233
V
0,-4.21142578125
V
-1,0
BOT
0,50.2396666666667
V
0,-4.24003601074219
V
-1,0
BOT
0,50.2463333333333
V
0,-4.26769256591797
V
-1,0
BOT
0,50.253
V
0,-4.29725646972656
V
-1,0
BOT
0,50.2596666666667
V
0,-4.32777404785156
V
-1,0
BOT
0,50.2663333333333
V
0,-4.35733795166016
V
-1,0
BOT
0,50.273
V
0,-4.38547134399414
V
-1,0
BOT
0,50.2796666666667
V
0,-4.41217422485352
V
-1,0
BOT
0,50.2863333333333
V
0,-4.43696975708008
V
-1,0
BOT
0,50.293
V
0,-4.4550895690918
V
-1,0
BOT
0,50.2996666666667
V
0,-4.46939468383789
V
-1,0
BOT
0,50.3063333333333
V
0,-4.48322296142578
V
-1,0
BOT
0,50.313
V
0,-4.49848175048828
V
-1,0
BOT
0,50.3196666666667
V
0,-4.51183319091797
V
-1,0
BOT
0,50.3263333333333
V
0,-4.52041625976563
V
-1,0
BOT
0,50.333
V
0,-4.52613830566406
V
-1,0
BOT
0,50.3396666666667
V
0,-4.52852249145508
V
-1,0
BOT
0,50.3463333333333
V
0,-4.52375411987305
V
-1,0
BOT
0,50.353
V
0,-4.51183319091797
V
-1,0
BOT
0,50.3596666666667
V
0,-4.49562072753906
V
-1,0
BOT
0,50.3663333333333
V
0,-4.47702407836914
V
-1,0
BOT
0,50.373
V
0,-4.45556640625
V
-1,0
BOT
0,50.3796666666667
V
0,-4.42886352539063
V
-1,0
BOT
0,50.3863333333334
V
0,-4.39929962158203
V
-1,0
BOT
0,50.393
V
0,-4.36878204345703
V
-1,0
BOT
0,50.3996666666667
V
0,-4.33778762817383
V
-1,0
BOT
0,50.4063333333333
V
0,-4.30440902709961
V
-1,0
BOT
0,50.413
V
0,-4.26769256591797
V
-1,0
BOT
0,50.4196666666667
V
0,-4.2271614074707
V
-1,0
BOT
0,50.4263333333333
V
0,-4.18519973754883
V
-1,0
BOT
0,50.433
V
0,-4.14085388183594
V
-1,0
BOT
0,50.4396666666667
V
0,-4.09746170043945
V
-1,0
BOT
0,50.4463333333334
V
0,-4.05454635620117
V
-1,0
BOT
0,50.453
V
0,-4.01210784912109
V
-1,0
BOT
0,50.4596666666667
V
0,-3.96966934204102
V
-1,0
BOT
0,50.4663333333334
V
0,-3.92770767211914
V
-1,0
BOT
0,50.473
V
0,-3.88669967651367
V
-1,0
BOT
0,50.4796666666667
V
0,-3.8447380065918
V
-1,0
BOT
0,50.4863333333334
V
0,-3.80373001098633
V
-1,0
BOT
0,50.493
V
0,-3.76605987548828
V
-1,0
BOT
0,50.4996666666667
V
0,-3.73172760009766
V
-1,0
BOT
0,50.5063333333333
V
0,-3.70025634765625
V
-1,0
BOT
0,50.513
V
0,-3.67307662963867
V
-1,0
BOT
0,50.5196666666667
V
0,-3.65161895751953
V
-1,0
BOT
0,50.5263333333333
V
0,-3.63874435424805
V
-1,0
BOT
0,50.533
V
0,-3.631591796875
V
-1,0
BOT
0,50.5396666666667
V
0,-3.62968444824219
V
-1,0
BOT
0,50.5463333333333
V
0,-3.63302230834961
V
-1,0
BOT
0,50.553
V
0,-3.64112854003906
V
-1,0
BOT
0,50.5596666666667
V
0,-3.65352630615234
V
-1,0
BOT
0,50.5663333333333
V
0,-3.66973876953125
V
-1,0
BOT
0,50.573
V
0,-3.68976593017578
V
-1,0
BOT
0,50.5796666666667
V
0,-3.71551513671875
V
-1,0
BOT
0,50.5863333333333
V
0,-3.74603271484375
V
-1,0
BOT
0,50.593
V
0,-3.78036499023437
V
-1,0
BOT
0,50.5996666666667
V
0,-3.81755828857422
V
-1,0
BOT
0,50.6063333333333
V
0,-3.85618209838867
V
-1,0
BOT
0,50.613
V
0,-3.89862060546875
V
-1,0
BOT
0,50.6196666666667
V
0,-3.94439697265625
V
-1,0
BOT
0,50.6263333333333
V
0,-3.99541854858398
V
-1,0
BOT
0,50.633
V
0,-4.04882431030273
V
-1,0
BOT
0,50.6396666666667
V
0,-4.10223007202148
V
-1,0
BOT
0,50.6463333333333
V
0,-4.15515899658203
V
-1,0
BOT
0,50.653
V
0,-4.20951843261719
V
-1,0
BOT
0,50.6596666666667
V
0,-4.26292419433594
V
-1,0
BOT
0,50.6663333333333
V
0,-4.31251525878906
V
-1,0
BOT
0,50.673
V
0,-4.35924530029297
V
-1,0
BOT
0,50.6796666666667
V
0,-4.40740585327148
V
-1,0
BOT
0,50.6863333333333
V
0,-4.45795059204102
V
-1,0
BOT
0,50.693
V
0,-4.50658798217773
V
-1,0
BOT
0,50.6996666666667
V
0,-4.55045700073242
V
-1,0
BOT
0,50.7063333333333
V
0,-4.59051132202148
V
-1,0
BOT
0,50.713
V
0,-4.62961196899414
V
-1,0
BOT
0,50.7196666666667
V
0,-4.66775894165039
V
-1,0
BOT
0,50.7263333333333
V
0,-4.70399856567383
V
-1,0
BOT
0,50.733
V
0,-4.73785400390625
V
-1,0
BOT
0,50.7396666666667
V
0,-4.77170944213867
V
-1,0
BOT
0,50.7463333333333
V
0,-4.8060417175293
V
-1,0
BOT
0,50.753
V
0,-4.83846664428711
V
-1,0
BOT
0,50.7596666666667
V
0,-4.86421585083008
V
-1,0
BOT
0,50.7663333333334
V
0,-4.88138198852539
V
-1,0
BOT
0,50.773
V
0,-4.89187240600586
V
-1,0
BOT
0,50.7796666666667
V
0,-4.8985481262207
V
-1,0
BOT
0,50.7863333333333
V
0,-4.90093231201172
V
-1,0
BOT
0,50.793
V
0,-4.90283966064453
V
-1,0
BOT
0,50.7996666666667
V
0,-4.90474700927734
V
-1,0
BOT
0,50.8063333333334
V
0,-4.90570068359375
V
-1,0
BOT
0,50.813
V
0,-4.90283966064453
V
-1,0
BOT
0,50.8196666666667
V
0,-4.89425659179688
V
-1,0
BOT
0,50.8263333333333
V
0,-4.88185882568359
V
-1,0
BOT
0,50.833
V
0,-4.86278533935547
V
-1,0
BOT
0,50.8396666666667
V
0,-4.83846664428711
V
-1,0
BOT
0,50.8463333333334
V
0,-4.80794906616211
V
-1,0
BOT
0,50.853
V
0,-4.77504730224609
V
-1,0
BOT
0,50.8596666666667
V
0,-4.74071502685547
V
-1,0
BOT
0,50.8663333333333
V
0,-4.69875335693359
V
-1,0
BOT
0,50.873
V
0,-4.64916229248047
V
-1,0
BOT
0,50.8796666666667
V
0,-4.59194183349609
V
-1,0
BOT
0,50.8863333333334
V
0,-4.52947616577148
V
-1,0
BOT
0,50.893
V
0,-4.45985794067383
V
-1,0
BOT
0,50.8996666666667
V
0,-4.38308715820313
V
-1,0
BOT
0,50.9063333333334
V
0,-4.30107116699219
V
-1,0
BOT
0,50.913
V
0,-4.21524047851563
V
-1,0
BOT
0,50.9196666666667
V
0,-4.12750244140625
V
-1,0
BOT
0,50.9263333333333
V
0,-4.03404235839844
V
-1,0
BOT
0,50.933
V
0,-3.93438339233398
V
-1,0
BOT
0,50.9396666666667
V
0,-3.8304328918457
V
-1,0
BOT
0,50.9463333333333
V
0,-3.7236213684082
V
-1,0
BOT
0,50.953
V
0,-3.61251831054687
V
-1,0
BOT
0,50.9596666666667
V
0,-3.49521636962891
V
-1,0
BOT
0,50.9663333333333
V
0,-3.3717155456543
V
-1,0
BOT
0,50.973
V
0,-3.24821472167969
V
-1,0
BOT
0,50.9796666666667
V
0,-3.12280654907227
V
-1,0
BOT
0,50.9863333333333
V
0,-2.99358367919922
V
-1,0
BOT
0,50.993
V
0,-2.86149978637695
V
-1,0
BOT
0,50.9996666666667
V
0,-2.72846221923828
V
-1,0
BOT
0,51.0063333333333
V
0,-2.59876251220703
V
-1,0
BOT
0,51.013
V
0,-2.46763229370117
V
-1,0
BOT
0,51.0196666666667
V
0,-2.3350715637207
V
-1,0
BOT
0,51.0263333333333
V
0,-2.20203399658203
V
-1,0
BOT
0,51.033
V
0,-2.07233428955078
V
-1,0
BOT
0,51.0396666666667
V
0,-1.94501876831055
V
-1,0
BOT
0,51.0463333333333
V
0,-1.8157958984375
V
-1,0
BOT
0,51.053
V
0,-1.68466567993164
V
-1,0
BOT
0,51.0596666666667
V
0,-1.55496597290039
V
-1,0
BOT
0,51.0663333333333
V
0,-1.42860412597656
V
-1,0
BOT
0,51.073
V
0,-1.30605697631836
V
-1,0
BOT
0,51.0796666666667
V
0,-1.18780136108398
V
-1,0
BOT
0,51.0863333333333
V
0,-1.07765197753906
V
-1,0
BOT
0,51.093
V
0,-0.974655151367188
V
-1,0
BOT
0,51.0996666666667
V
0,-0.878810882568359
V
-1,0
BOT
0,51.1063333333333
V
0,-0.788211822509766
V
-1,0
BOT
0,51.113
V
0,-0.701904296875
V
-1,0
BOT
0,51.1196666666667
V
0,-0.620365142822266
V
-1,0
BOT
0,51.1263333333333
V
0,-0.544071197509766
V
-1,0
BOT
0,51.133
V
0,-0.476360321044922
V
-1,0
BOT
0,51.1396666666667
V
0,-0.416755676269531
V
-1,0
BOT
0,51.1463333333333
V
0,-0.365734100341797
V
-1,0
BOT
0,51.153
V
0,-0.322341918945312
V
-1,0
BOT
0,51.1596666666667
V
0,-0.285625457763672
V
-1,0
BOT
0,51.1663333333333
V
0,-0.254631042480469
V
-1,0
BOT
0,51.173
V
0,-0.228404998779297
V
-1,0
BOT
0,51.1796666666667
V
0,-0.206470489501953
V
-1,0
BOT
0,51.1863333333333
V
0,-0.192642211914062
V
-1,0
BOT
0,51.193
V
0,-0.186443328857422
V
-1,0
BOT
0,51.1996666666667
V
0,-0.188827514648437
V
-1,0
BOT
0,51.2063333333333
V
0,-0.199794769287109
V
-1,0
BOT
0,51.213
V
0,-0.220298767089844
V
-1,0
BOT
0,51.2196666666667
V
0,-0.247478485107422
V
-1,0
BOT
0,51.2263333333334
V
0,-0.279426574707031
V
-1,0
BOT
0,51.233
V
0,-0.318050384521484
V
-1,0
BOT
0,51.2396666666667
V
0,-0.364303588867187
V
-1,0
BOT
0,51.2463333333333
V
0,-0.416278839111328
V
-1,0
BOT
0,51.253
V
0,-0.4730224609375
V
-1,0
BOT
0,51.2596666666667
V
0,-0.536441802978516
V
-1,0
BOT
0,51.2663333333334
V
0,-0.606536865234375
V
-1,0
BOT
0,51.273
V
0,-0.67901611328125
V
-1,0
BOT
0,51.2796666666667
V
0,-0.752449035644531
V
-1,0
BOT
0,51.2863333333334
V
0,-0.828266143798828
V
-1,0
BOT
0,51.293
V
0,-0.906467437744141
V
-1,0
BOT
0,51.2996666666667
V
0,-0.985145568847656
V
-1,0
BOT
0,51.3063333333334
V
0,-1.06334686279297
V
-1,0
BOT
0,51.313
V
0,-1.1439323425293
V
-1,0
BOT
0,51.3196666666667
V
0,-1.22642517089844
V
-1,0
BOT
0,51.3263333333333
V
0,-1.30939483642578
V
-1,0
BOT
0,51.333
V
0,-1.39188766479492
V
-1,0
BOT
0,51.3396666666667
V
0,-1.47390365600586
V
-1,0
BOT
0,51.3463333333333
V
0,-1.55401229858398
V
-1,0
BOT
0,51.353
V
0,-1.63078308105469
V
-1,0
BOT
0,51.3596666666667
V
0,-1.70469284057617
V
-1,0
BOT
0,51.3663333333333
V
0,-1.77574157714844
V
-1,0
BOT
0,51.373
V
0,-1.84202194213867
V
-1,0
BOT
0,51.3796666666667
V
0,-1.90353393554687
V
-1,0
BOT
0,51.3863333333333
V
0,-1.96313858032227
V
-1,0
BOT
0,51.393
V
0,-2.02178955078125
V
-1,0
BOT
0,51.3996666666667
V
0,-2.07662582397461
V
-1,0
BOT
0,51.4063333333333
V
0,-2.12430953979492
V
-1,0
BOT
0,51.413
V
0,-2.1672248840332
V
-1,0
BOT
0,51.4196666666667
V
0,-2.20823287963867
V
-1,0
BOT
0,51.4263333333333
V
0,-2.24542617797852
V
-1,0
BOT
0,51.433
V
0,-2.27785110473633
V
-1,0
BOT
0,51.4396666666667
V
0,-2.30693817138672
V
-1,0
BOT
0,51.4463333333333
V
0,-2.3341178894043
V
-1,0
BOT
0,51.453
V
0,-2.35891342163086
V
-1,0
BOT
0,51.4596666666667
V
0,-2.38323211669922
V
-1,0
BOT
0,51.4663333333333
V
0,-2.40755081176758
V
-1,0
BOT
0,51.473
V
0,-2.42948532104492
V
-1,0
BOT
0,51.4796666666667
V
0,-2.44760513305664
V
-1,0
BOT
0,51.4863333333333
V
0,-2.46334075927734
V
-1,0
BOT
0,51.493
V
0,-2.47621536254883
V
-1,0
BOT
0,51.4996666666667
V
0,-2.48432159423828
V
-1,0
BOT
0,51.5063333333333
V
0,-2.4871826171875
V
-1,0
BOT
0,51.513
V
0,-2.4867057800293
V
-1,0
BOT
0,51.5196666666667
V
0,-2.48193740844727
V
-1,0
BOT
0,51.5263333333333
V
0,-2.47335433959961
V
-1,0
BOT
0,51.533
V
0,-2.46095657348633
V
-1,0
BOT
0,51.5396666666667
V
0,-2.44426727294922
V
-1,0
BOT
0,51.5463333333333
V
0,-2.42137908935547
V
-1,0
BOT
0,51.553
V
0,-2.39229202270508
V
-1,0
BOT
0,51.5596666666667
V
0,-2.35748291015625
V
-1,0
BOT
0,51.5663333333333
V
0,-2.31599807739258
V
-1,0
BOT
0,51.573
V
0,-2.26449966430664
V
-1,0
BOT
0,51.5796666666667
V
0,-2.20203399658203
V
-1,0
BOT
0,51.5863333333333
V
0,-2.13241577148437
V
-1,0
BOT
0,51.593
V
0,-2.05659866333008
V
-1,0
BOT
0,51.5996666666667
V
0,-1.97410583496094
V
-1,0
BOT
0,51.6063333333334
V
0,-1.88541412353516
V
-1,0
BOT
0,51.613
V
0,-1.79290771484375
V
-1,0
BOT
0,51.6196666666667
V
0,-1.69515609741211
V
-1,0
BOT
0,51.6263333333333
V
0,-1.58929824829102
V
-1,0
BOT
0,51.633
V
0,-1.47247314453125
V
-1,0
BOT
0,51.6396666666667
V
0,-1.34897232055664
V
-1,0
BOT
0,51.6463333333333
V
0,-1.2211799621582
V
-1,0
BOT
0,51.653
V
0,-1.09148025512695
V
-1,0
BOT
0,51.6596666666667
V
0,-0.9613037109375
V
-1,0
BOT
0,51.6663333333334
V
0,-0.832080841064453
V
-1,0
BOT
0,51.673
V
0,-0.705718994140625
V
-1,0
BOT
0,51.6796666666667
V
0,-0.583171844482422
V
-1,0
BOT
0,51.6863333333334
V
0,-0.464439392089844
V
-1,0
BOT
0,51.693
V
0,-0.347614288330078
V
-1,0
BOT
0,51.6996666666667
V
0,-0.235557556152344
V
-1,0
BOT
0,51.7063333333334
V
0,-0.133037567138672
V
-1,0
BOT
0,51.713
V
0,-0.0433921813964844
V
-1,0
BOT
0,51.7196666666667
V
0,0.0367164611816406
V
-1,0
BOT
0,51.7263333333333
V
0,0.108242034912109
V
-1,0
BOT
0,51.733
V
0,0.166893005371094
V
-1,0
BOT
0,51.7396666666667
V
0,0.208377838134766
V
-1,0
BOT
0,51.7463333333333
V
0,0.23651123046875
V
-1,0
BOT
0,51.753
V
0,0.252723693847656
V
-1,0
BOT
0,51.7596666666667
V
0,0.257015228271484
V
-1,0
BOT
0,51.7663333333333
V
0,0.244617462158203
V
-1,0
BOT
0,51.773
V
0,0.216007232666016
V
-1,0
BOT
0,51.7796666666667
V
0,0.174999237060547
V
-1,0
BOT
0,51.7863333333333
V
0,0.1220703125
V
-1,0
BOT
0,51.793
V
0,0.057220458984375
V
-1,0
BOT
0,51.7996666666667
V
0,-0.0185966491699219
V
-1,0
BOT
0,51.8063333333333
V
0,-0.104427337646484
V
-1,0
BOT
0,51.813
V
0,-0.200271606445312
V
-1,0
BOT
0,51.8196666666667
V
0,-0.306129455566406
V
-1,0
BOT
0,51.8263333333333
V
0,-0.421524047851563
V
-1,0
BOT
0,51.833
V
0,-0.542640686035156
V
-1,0
BOT
0,51.8396666666667
V
0,-0.670909881591797
V
-1,0
BOT
0,51.8463333333333
V
0,-0.803947448730469
V
-1,0
BOT
0,51.853
V
0,-0.938892364501953
V
-1,0
BOT
0,51.8596666666667
V
0,-1.07383728027344
V
-1,0
BOT
0,51.8663333333333
V
0,-1.21212005615234
V
-1,0
BOT
0,51.873
V
0,-1.35564804077148
V
-1,0
BOT
0,51.8796666666667
V
0,-1.50012969970703
V
-1,0
BOT
0,51.8863333333333
V
0,-1.64508819580078
V
-1,0
BOT
0,51.893
V
0,-1.78909301757812
V
-1,0
BOT
0,51.8996666666667
V
0,-1.93166732788086
V
-1,0
BOT
0,51.9063333333333
V
0,-2.06947326660156
V
-1,0
BOT
0,51.913
V
0,-2.20298767089844
V
-1,0
BOT
0,51.9196666666667
V
0,-2.33268737792969
V
-1,0
BOT
0,51.9263333333333
V
0,-2.45809555053711
V
-1,0
BOT
0,51.933
V
0,-2.5792121887207
V
-1,0
BOT
0,51.9396666666667
V
0,-2.69556045532227
V
-1,0
BOT
0,51.9463333333333
V
0,-2.8076171875
V
-1,0
BOT
0,51.953
V
0,-2.9139518737793
V
-1,0
BOT
0,51.9596666666667
V
0,-3.01551818847656
V
-1,0
BOT
0,51.9663333333333
V
0,-3.11183929443359
V
-1,0
BOT
0,51.973
V
0,-3.20339202880859
V
-1,0
BOT
0,51.9796666666667
V
0,-3.29208374023437
V
-1,0
BOT
0,51.9863333333334
V
0,-3.37696075439453
V
-1,0
BOT
0,51.993
V
0,-3.45849990844727
V
-1,0
BOT
0,51.9996666666667
V
0,-3.53479385375977
V
-1,0
BOT
0,52.0063333333333
V
0,-3.60727310180664
V
-1,0
BOT
0,52.013
V
0,-3.67498397827148
V
-1,0
BOT
0,52.0196666666667
V
0,-3.73649597167969
V
-1,0
BOT
0,52.0263333333334
V
0,-3.79228591918945
V
-1,0
BOT
0,52.033
V
0,-3.84187698364258
V
-1,0
BOT
0,52.0396666666667
V
0,-3.88813018798828
V
-1,0
BOT
0,52.0463333333333
V
0,-3.93295288085937
V
-1,0
BOT
0,52.053
V
0,-3.97443771362305
V
-1,0
BOT
0,52.0596666666667
V
0,-4.01163101196289
V
-1,0
BOT
0,52.0663333333334
V
0,-4.04500961303711
V
-1,0
BOT
0,52.073
V
0,-4.07505035400391
V
-1,0
BOT
0,52.0796666666667
V
0,-4.10175323486328
V
-1,0
BOT
0,52.0863333333334
V
0,-4.12607192993164
V
-1,0
BOT
0,52.093
V
0,-4.14943695068359
V
-1,0
BOT
0,52.0996666666667
V
0,-4.17327880859375
V
-1,0
BOT
0,52.1063333333334
V
0,-4.1956901550293
V
-1,0
BOT
0,52.113
V
0,-4.21380996704102
V
-1,0
BOT
0,52.1196666666667
V
0,-4.22906875610352
V
-1,0
BOT
0,52.1263333333333
V
0,-4.2414665222168
V
-1,0
BOT
0,52.133
V
0,-4.25100326538086
V
-1,0
BOT
0,52.1396666666667
V
0,-4.2572021484375
V
-1,0
BOT
0,52.1463333333333
V
0,-4.26101684570313
V
-1,0
BOT
0,52.153
V
0,-4.26530838012695
V
-1,0
BOT
0,52.1596666666667
V
0,-4.26864624023438
V
-1,0
BOT
0,52.1663333333333
V
0,-4.2719841003418
V
-1,0
BOT
0,52.173
V
0,-4.27532196044922
V
-1,0
BOT
0,52.1796666666667
V
0,-4.27961349487305
V
-1,0
BOT
0,52.1863333333333
V
0,-4.28438186645508
V
-1,0
BOT
0,52.193
V
0,-4.29105758666992
V
-1,0
BOT
0,52.1996666666667
V
0,-4.30107116699219
V
-1,0
BOT
0,52.2063333333333
V
0,-4.31299209594727
V
-1,0
BOT
0,52.213
V
0,-4.32491302490234
V
-1,0
BOT
0,52.2196666666667
V
0,-4.33588027954102
V
-1,0
BOT
0,52.2263333333333
V
0,-4.34684753417969
V
-1,0
BOT
0,52.233
V
0,-4.35733795166016
V
-1,0
BOT
0,52.2396666666667
V
0,-4.36878204345703
V
-1,0
BOT
0,52.2463333333333
V
0,-4.38165664672852
V
-1,0
BOT
0,52.253
V
0,-4.39739227294922
V
-1,0
BOT
0,52.2596666666667
V
0,-4.41789627075195
V
-1,0
BOT
0,52.2663333333333
V
0,-4.44316864013672
V
-1,0
BOT
0,52.273
V
0,-4.46987152099609
V
-1,0
BOT
0,52.2796666666667
V
0,-4.49514389038086
V
-1,0
BOT
0,52.2863333333333
V
0,-4.51993942260742
V
-1,0
BOT
0,52.293
V
0,-4.54425811767578
V
-1,0
BOT
0,52.2996666666667
V
0,-4.56714630126953
V
-1,0
BOT
0,52.3063333333333
V
0,-4.58908081054688
V
-1,0
BOT
0,52.313
V
0,-4.61196899414063
V
-1,0
BOT
0,52.3196666666667
V
0,-4.63533401489258
V
-1,0
BOT
0,52.3263333333333
V
0,-4.66012954711914
V
-1,0
BOT
0,52.333
V
0,-4.6849250793457
V
-1,0
BOT
0,52.3396666666667
V
0,-4.71162796020508
V
-1,0
BOT
0,52.3463333333333
V
0,-4.73737716674805
V
-1,0
BOT
0,52.353
V
0,-4.76264953613281
V
-1,0
BOT
0,52.3596666666667
V
0,-4.7917366027832
V
-1,0
BOT
0,52.3663333333333
V
0,-4.82559204101563
V
-1,0
BOT
0,52.373
V
0,-4.86040115356445
V
-1,0
BOT
0,52.3796666666667
V
0,-4.89234924316406
V
-1,0
BOT
0,52.3863333333333
V
0,-4.92382049560547
V
-1,0
BOT
0,52.393
V
0,-4.95672225952148
V
-1,0
BOT
0,52.3996666666667
V
0,-4.98771667480469
V
-1,0
BOT
0,52.4063333333334
V
0,-5.01489639282227
V
-1,0
BOT
0,52.413
V
0,-5.04064559936523
V
-1,0
BOT
0,52.4196666666667
V
0,-5.06925582885742
V
-1,0
BOT
0,52.4263333333333
V
0,-5.09786605834961
V
-1,0
BOT
0,52.433
V
0,-5.12361526489258
V
-1,0
BOT
0,52.4396666666667
V
0,-5.14745712280273
V
-1,0
BOT
0,52.4463333333334
V
0,-5.17177581787109
V
-1,0
BOT
0,52.453
V
0,-5.19561767578125
V
-1,0
BOT
0,52.4596666666667
V
0,-5.2180290222168
V
-1,0
BOT
0,52.4663333333333
V
0,-5.24139404296875
V
-1,0
BOT
0,52.473
V
0,-5.2647590637207
V
-1,0
BOT
0,52.4796666666667
V
0,-5.28717041015625
V
-1,0
BOT
0,52.4863333333334
V
0,-5.30767440795898
V
-1,0
BOT
0,52.493
V
0,-5.3257942199707
V
-1,0
BOT
0,52.4996666666667
V
0,-5.3400993347168
V
-1,0
BOT
0,52.5063333333334
V
0,-5.35106658935547
V
-1,0
BOT
0,52.513
V
0,-5.36060333251953
V
-1,0
BOT
0,52.5196666666667
V
0,-5.36918640136719
V
-1,0
BOT
0,52.5263333333333
V
0,-5.37586212158203
V
-1,0
BOT
0,52.533
V
0,-5.38110733032227
V
-1,0
BOT
0,52.5396666666667
V
0,-5.3863525390625
V
-1,0
BOT
0,52.5463333333333
V
0,-5.39112091064453
V
-1,0
BOT
0,52.553
V
0,-5.39255142211914
V
-1,0
BOT
0,52.5596666666667
V
0,-5.38921356201172
V
-1,0
BOT
0,52.5663333333333
V
0,-5.38253784179688
V
-1,0
BOT
0,52.573
V
0,-5.37395477294922
V
-1,0
BOT
0,52.5796666666667
V
0,-5.36251068115234
V
-1,0
BOT
0,52.5863333333333
V
0,-5.34629821777344
V
-1,0
BOT
0,52.593
V
0,-5.3248405456543
V
-1,0
BOT
0,52.5996666666667
V
0,-5.30052185058594
V
-1,0
BOT
0,52.6063333333333
V
0,-5.27524948120117
V
-1,0
BOT
0,52.613
V
0,-5.24663925170898
V
-1,0
BOT
0,52.6196666666667
V
0,-5.21421432495117
V
-1,0
BOT
0,52.6263333333333
V
0,-5.17892837524414
V
-1,0
BOT
0,52.633
V
0,-5.14125823974609
V
-1,0
BOT
0,52.6396666666667
V
0,-5.09977340698242
V
-1,0
BOT
0,52.6463333333333
V
0,-5.05352020263672
V
-1,0
BOT
0,52.653
V
0,-5.00297546386719
V
-1,0
BOT
0,52.6596666666667
V
0,-4.94861602783203
V
-1,0
BOT
0,52.6663333333333
V
0,-4.89330291748047
V
-1,0
BOT
0,52.673
V
0,-4.8365592956543
V
-1,0
BOT
0,52.6796666666667
V
0,-4.7760009765625
V
-1,0
BOT
0,52.6863333333333
V
0,-4.70972061157227
V
-1,0
BOT
0,52.693
V
0,-4.638671875
V
-1,0
BOT
0,52.6996666666667
V
0,-4.56619262695313
V
-1,0
BOT
0,52.7063333333333
V
0,-4.49132919311523
V
-1,0
BOT
0,52.713
V
0,-4.41455841064453
V
-1,0
BOT
0,52.7196666666667
V
0,-4.33731079101563
V
-1,0
BOT
0,52.7263333333333
V
0,-4.26340103149414
V
-1,0
BOT
0,52.733
V
0,-4.18901443481445
V
-1,0
BOT
0,52.7396666666667
V
0,-4.11081314086914
V
-1,0
BOT
0,52.7463333333333
V
0,-4.02927398681641
V
-1,0
BOT
0,52.753
V
0,-3.94773483276367
V
-1,0
BOT
0,52.7596666666667
V
0,-3.86810302734375
V
-1,0
BOT
0,52.7663333333333
V
0,-3.78942489624023
V
-1,0
BOT
0,52.773
V
0,-3.71170043945312
V
-1,0
BOT
0,52.7796666666667
V
0,-3.63731384277344
V
-1,0
BOT
0,52.7863333333333
V
0,-3.56626510620117
V
-1,0
BOT
0,52.793
V
0,-3.49807739257812
V
-1,0
BOT
0,52.7996666666667
V
0,-3.4327507019043
V
-1,0
BOT
0,52.8063333333333
V
0,-3.37076187133789
V
-1,0
BOT
0,52.813
V
0,-3.31211090087891
V
-1,0
BOT
0,52.8196666666667
V
0,-3.25775146484375
V
-1,0
BOT
0,52.8263333333334
V
0,-3.20863723754883
V
-1,0
BOT
0,52.833
V
0,-3.16381454467773
V
-1,0
BOT
0,52.8396666666667
V
0,-3.12423706054687
V
-1,0
BOT
0,52.8463333333333
V
0,-3.08895111083984
V
-1,0
BOT
0,52.853
V
0,-3.05986404418945
V
-1,0
BOT
0,52.8596666666667
V
0,-3.0360221862793
V
-1,0
BOT
0,52.8663333333333
V
0,-3.01742553710937
V
-1,0
BOT
0,52.873
V
0,-3.00359725952148
V
-1,0
BOT
0,52.8796666666667
V
0,-2.99644470214844
V
-1,0
BOT
0,52.8863333333334
V
0,-2.99406051635742
V
-1,0
BOT
0,52.893
V
0,-2.99596786499023
V
-1,0
BOT
0,52.8996666666667
V
0,-3.00216674804687
V
-1,0
BOT
0,52.9063333333334
V
0,-3.01313400268555
V
-1,0
BOT
0,52.913
V
0,-3.02505493164062
V
-1,0
BOT
0,52.9196666666667
V
0,-3.03840637207031
V
-1,0
BOT
0,52.9263333333333
V
0,-3.05509567260742
V
-1,0
BOT
0,52.933
V
0,-3.07559967041016
V
-1,0
BOT
0,52.9396666666667
V
0,-3.09896469116211
V
-1,0
BOT
0,52.9463333333333
V
0,-3.12614440917969
V
-1,0
BOT
0,52.953
V
0,-3.15952301025391
V
-1,0
BOT
0,52.9596666666667
V
0,-3.20005416870117
V
-1,0
BOT
0,52.9663333333333
V
0,-3.24440002441406
V
-1,0
BOT
0,52.973
V
0,-3.29017639160156
V
-1,0
BOT
0,52.9796666666667
V
0,-3.33452224731445
V
-1,0
BOT
0,52.9863333333333
V
0,-3.37839126586914
V
-1,0
BOT
0,52.993
V
0,-3.42321395874023
V
-1,0
BOT
0,52.9996666666667
V
0,-3.46660614013672
V
-1,0
BOT
0,53.0063333333333
V
0,-3.51047515869141
V
-1,0
BOT
0,53.013
V
0,-3.5557746887207
V
-1,0
BOT
0,53.0196666666667
V
0,-3.60536575317383
V
-1,0
BOT
0,53.0263333333333
V
0,-3.65543365478516
V
-1,0
BOT
0,53.033
V
0,-3.70168685913086
V
-1,0
BOT
0,53.0396666666667
V
0,-3.74650955200195
V
-1,0
BOT
0,53.0463333333333
V
0,-3.79037857055664
V
-1,0
BOT
0,53.053
V
0,-3.83329391479492
V
-1,0
BOT
0,53.0596666666667
V
0,-3.87287139892578
V
-1,0
BOT
0,53.0663333333333
V
0,-3.91054153442383
V
-1,0
BOT
0,53.073
V
0,-3.94725799560547
V
-1,0
BOT
0,53.0796666666667
V
0,-3.98159027099609
V
-1,0
BOT
0,53.0863333333333
V
0,-4.0135383605957
V
-1,0
BOT
0,53.093
V
0,-4.0440559387207
V
-1,0
BOT
0,53.0996666666667
V
0,-4.0736198425293
V
-1,0
BOT
0,53.1063333333333
V
0,-4.09936904907227
V
-1,0
BOT
0,53.113
V
0,-4.12368774414063
V
-1,0
BOT
0,53.1196666666667
V
0,-4.14466857910156
V
-1,0
BOT
0,53.1263333333333
V
0,-4.16231155395508
V
-1,0
BOT
0,53.133
V
0,-4.17757034301758
V
-1,0
BOT
0,53.1396666666667
V
0,-4.19139862060547
V
-1,0
BOT
0,53.1463333333333
V
0,-4.20761108398438
V
-1,0
BOT
0,53.153
V
0,-4.2262077331543
V
-1,0
BOT
0,53.1596666666667
V
0,-4.24575805664063
V
-1,0
BOT
0,53.1663333333333
V
0,-4.26340103149414
V
-1,0
BOT
0,53.173
V
0,-4.27818298339844
V
-1,0
BOT
0,53.1796666666667
V
0,-4.29344177246094
V
-1,0
BOT
0,53.1863333333333
V
0,-4.31060791015625
V
-1,0
BOT
0,53.193
V
0,-4.32777404785156
V
-1,0
BOT
0,53.1996666666667
V
0,-4.34732437133789
V
-1,0
BOT
0,53.2063333333334
V
0,-4.36925888061523
V
-1,0
BOT
0,53.213
V
0,-4.39167022705078
V
-1,0
BOT
0,53.2196666666667
V
0,-4.41312789916992
V
-1,0
BOT
0,53.2263333333333
V
0,-4.43267822265625
V
-1,0
BOT
0,53.233
V
0,-4.45175170898438
V
-1,0
BOT
0,53.2396666666667
V
0,-4.4708251953125
V
-1,0
BOT
0,53.2463333333333
V
0,-4.49132919311523
V
-1,0
BOT
0,53.253
V
0,-4.51517105102539
V
-1,0
BOT
0,53.2596666666667
V
0,-4.54044342041016
V
-1,0
BOT
0,53.2663333333334
V
0,-4.56714630126953
V
-1,0
BOT
0,53.273
V
0,-4.59480285644531
V
-1,0
BOT
0,53.2796666666667
V
0,-4.62245941162109
V
-1,0
BOT
0,53.2863333333334
V
0,-4.64963912963867
V
-1,0
BOT
0,53.293
V
0,-4.67634201049805
V
-1,0
BOT
0,53.2996666666667
V
0,-4.70447540283203
V
-1,0
BOT
0,53.3063333333334
V
0,-4.73117828369141
V
-1,0
BOT
0,53.313
V
0,-4.75597381591797
V
-1,0
BOT
0,53.3196666666667
V
0,-4.78124618530273
V
-1,0
BOT
0,53.3263333333333
V
0,-4.8060417175293
V
-1,0
BOT
0,53.333
V
0,-4.83131408691406
V
-1,0
BOT
0,53.3396666666667
V
0,-4.85658645629883
V
-1,0
BOT
0,53.3463333333333
V
0,-4.88424301147461
V
-1,0
BOT
0,53.353
V
0,-4.91523742675781
V
-1,0
BOT
0,53.3596666666667
V
0,-4.94575500488281
V
-1,0
BOT
0,53.3663333333333
V
0,-4.97579574584961
V
-1,0
BOT
0,53.373
V
0,-5.00202178955078
V
-1,0
BOT
0,53.3796666666667
V
0,-5.02443313598633
V
-1,0
BOT
0,53.3863333333333
V
0,-5.04493713378906
V
-1,0
BOT
0,53.393
V
0,-5.06305694580078
V
-1,0
BOT
0,53.3996666666667
V
0,-5.07926940917969
V
-1,0
BOT
0,53.4063333333334
V
0,-5.09262084960938
V
-1,0
BOT
0,53.413
V
0,-5.10644912719727
V
-1,0
BOT
0,53.4196666666667
V
0,-5.12075424194336
V
-1,0
BOT
0,53.4263333333333
V
0,-5.13267517089844
V
-1,0
BOT
0,53.433
V
0,-5.1417350769043
V
-1,0
BOT
0,53.4396666666667
V
0,-5.14888763427734
V
-1,0
BOT
0,53.4463333333333
V
0,-5.15508651733398
V
-1,0
BOT
0,53.453
V
0,-5.15842437744141
V
-1,0
BOT
0,53.4596666666667
V
0,-5.16223907470703
V
-1,0
BOT
0,53.4663333333333
V
0,-5.16700744628906
V
-1,0
BOT
0,53.473
V
0,-5.17129898071289
V
-1,0
BOT
0,53.4796666666667
V
0,-5.17416000366211
V
-1,0
BOT
0,53.4863333333333
V
0,-5.17845153808594
V
-1,0
BOT
0,53.493
V
0,-5.18512725830078
V
-1,0
BOT
0,53.4996666666667
V
0,-5.19037246704102
V
-1,0
BOT
0,53.5063333333333
V
0,-5.19371032714844
V
-1,0
BOT
0,53.513
V
0,-5.19466400146484
V
-1,0
BOT
0,53.5196666666667
V
0,-5.19514083862305
V
-1,0
BOT
0,53.5263333333333
V
0,-5.19466400146484
V
-1,0
BOT
0,53.533
V
0,-5.19227981567383
V
-1,0
BOT
0,53.5396666666667
V
0,-5.18941879272461
V
-1,0
BOT
0,53.5463333333333
V
0,-5.18608093261719
V
-1,0
BOT
0,53.553
V
0,-5.18274307250977
V
-1,0
BOT
0,53.5596666666667
V
0,-5.18083572387695
V
-1,0
BOT
0,53.5663333333333
V
0,-5.18178939819336
V
-1,0
BOT
0,53.573
V
0,-5.18274307250977
V
-1,0
BOT
0,53.5796666666667
V
0,-5.18226623535156
V
-1,0
BOT
0,53.5863333333334
V
0,-5.17940521240234
V
-1,0
BOT
0,53.593
V
0,-5.17511367797852
V
-1,0
BOT
0,53.5996666666667
V
0,-5.17082214355469
V
-1,0
BOT
0,53.6063333333333
V
0,-5.16366958618164
V
-1,0
BOT
0,53.613
V
0,-5.15556335449219
V
-1,0
BOT
0,53.6196666666667
V
0,-5.14745712280273
V
-1,0
BOT
0,53.6263333333334
V
0,-5.14078140258789
V
-1,0
BOT
0,53.633
V
0,-5.13458251953125
V
-1,0
BOT
0,53.6396666666667
V
0,-5.12552261352539
V
-1,0
BOT
0,53.6463333333333
V
0,-5.11455535888672
V
-1,0
BOT
0,53.653
V
0,-5.09977340698242
V
-1,0
BOT
0,53.6596666666667
V
0,-5.08260726928711
V
-1,0
BOT
0,53.6663333333334
V
0,-5.06210327148438
V
-1,0
BOT
0,53.673
V
0,-5.03826141357422
V
-1,0
BOT
0,53.6796666666667
V
0,-5.01251220703125
V
-1,0
BOT
0,53.6863333333333
V
0,-4.98485565185547
V
-1,0
BOT
0,53.693
V
0,-4.95672225952148
V
-1,0
BOT
0,53.6996666666667
V
0,-4.92668151855469
V
-1,0
BOT
0,53.7063333333334
V
0,-4.89425659179688
V
-1,0
BOT
0,53.713
V
0,-4.86087799072266
V
-1,0
BOT
0,53.7196666666667
V
0,-4.82702255249023
V
-1,0
BOT
0,53.7263333333334
V
0,-4.79269027709961
V
-1,0
BOT
0,53.733
V
0,-4.75692749023438
V
-1,0
BOT
0,53.7396666666667
V
0,-4.72068786621094
V
-1,0
BOT
0,53.7463333333333
V
0,-4.6839714050293
V
-1,0
BOT
0,53.753
V
0,-4.64630126953125
V
-1,0
BOT
0,53.7596666666667
V
0,-4.60672378540039
V
-1,0
BOT
0,53.7663333333333
V
0,-4.56666946411133
V
-1,0
BOT
0,53.773
V
0,-4.52613830566406
V
-1,0
BOT
0,53.7796666666667
V
0,-4.48369979858398
V
-1,0
BOT
0,53.7863333333333
V
0,-4.44173812866211
V
-1,0
BOT
0,53.793
V
0,-4.40025329589844
V
-1,0
BOT
0,53.7996666666667
V
0,-4.36067581176758
V
-1,0
BOT
0,53.8063333333333
V
0,-4.32109832763672
V
-1,0
BOT
0,53.813
V
0,-4.28390502929688
V
-1,0
BOT
0,53.8196666666667
V
0,-4.25291061401367
V
-1,0
BOT
0,53.8263333333333
V
0,-4.22525405883789
V
-1,0
BOT
0,53.833
V
0,-4.19950485229492
V
-1,0
BOT
0,53.8396666666667
V
0,-4.17423248291016
V
-1,0
BOT
0,53.8463333333333
V
0,-4.15134429931641
V
-1,0
BOT
0,53.853
V
0,-4.12988662719727
V
-1,0
BOT
0,53.8596666666667
V
0,-4.10652160644531
V
-1,0
BOT
0,53.8663333333333
V
0,-4.08315658569336
V
-1,0
BOT
0,53.873
V
0,-4.05979156494141
V
-1,0
BOT
0,53.8796666666667
V
0,-4.03833389282227
V
-1,0
BOT
0,53.8863333333333
V
0,-4.01782989501953
V
-1,0
BOT
0,53.893
V
0,-3.9982795715332
V
-1,0
BOT
0,53.8996666666667
V
0,-3.97872924804687
V
-1,0
BOT
0,53.9063333333333
V
0,-3.96060943603516
V
-1,0
BOT
0,53.913
V
0,-3.94392013549805
V
-1,0
BOT
0,53.9196666666667
V
0,-3.92913818359375
V
-1,0
BOT
0,53.9263333333333
V
0,-3.91626358032227
V
-1,0
BOT
0,53.933
V
0,-3.90386581420898
V
-1,0
BOT
0,53.9396666666667
V
0,-3.89337539672852
V
-1,0
BOT
0,53.9463333333333
V
0,-3.88145446777344
V
-1,0
BOT
0,53.953
V
0,-3.86810302734375
V
-1,0
BOT
0,53.9596666666667
V
0,-3.85379791259766
V
-1,0
BOT
0,53.9663333333333
V
0,-3.83901596069336
V
-1,0
BOT
0,53.973
V
0,-3.82423400878906
V
-1,0
BOT
0,53.9796666666667
V
0,-3.80897521972656
V
-1,0
BOT
0,53.9863333333333
V
0,-3.79419326782227
V
-1,0
BOT
0,53.993
V
0,-3.77893447875977
V
-1,0
BOT
0,53.9996666666667
V
0,-3.76224517822266
V
-1,0
BOT
0,54.0063333333333
V
0,-3.74412536621094
V
-1,0
BOT
0,54.013
V
0,-3.7236213684082
V
-1,0
BOT
0,54.0196666666667
V
0,-3.70216369628906
V
-1,0
BOT
0,54.0263333333333
V
0,-3.68213653564453
V
-1,0
BOT
0,54.033
V
0,-3.66306304931641
V
-1,0
BOT
0,54.0396666666667
V
0,-3.64303588867187
V
-1,0
BOT
0,54.0463333333334
V
0,-3.62110137939453
V
-1,0
BOT
0,54.053
V
0,-3.59916687011719
V
-1,0
BOT
0,54.0596666666667
V
0,-3.57818603515625
V
-1,0
BOT
0,54.0663333333333
V
0,-3.55720520019531
V
-1,0
BOT
0,54.073
V
0,-3.53670120239258
V
-1,0
BOT
0,54.0796666666667
V
0,-3.51810455322266
V
-1,0
BOT
0,54.0863333333334
V
0,-3.50189208984375
V
-1,0
BOT
0,54.093
V
0,-3.48806381225586
V
-1,0
BOT
0,54.0996666666667
V
0,-3.47471237182617
V
-1,0
BOT
0,54.1063333333334
V
0,-3.4632682800293
V
-1,0
BOT
0,54.113
V
0,-3.45230102539062
V
-1,0
BOT
0,54.1196666666667
V
0,-3.44085693359375
V
-1,0
BOT
0,54.1263333333334
V
0,-3.42893600463867
V
-1,0
BOT
0,54.133
V
0,-3.41510772705078
V
-1,0
BOT
0,54.1396666666667
V
0,-3.40127944946289
V
-1,0
BOT
0,54.1463333333333
V
0,-3.38935852050781
V
-1,0
BOT
0,54.153
V
0,-3.38125228881836
V
-1,0
BOT
0,54.1596666666667
V
0,-3.37505340576172
V
-1,0
BOT
0,54.1663333333333
V
0,-3.37123870849609
V
-1,0
BOT
0,54.173
V
0,-3.37123870849609
V
-1,0
BOT
0,54.1796666666667
V
0,-3.37600708007812
V
-1,0
BOT
0,54.1863333333333
V
0,-3.38125228881836
V
-1,0
BOT
0,54.193
V
0,-3.38411331176758
V
-1,0
BOT
0,54.1996666666667
V
0,-3.387451171875
V
-1,0
BOT
0,54.2063333333333
V
0,-3.39317321777344
V
-1,0
BOT
0,54.213
V
0,-3.40080261230469
V
-1,0
BOT
0,54.2196666666667
V
0,-3.40700149536133
V
-1,0
BOT
0,54.2263333333333
V
0,-3.41129302978516
V
-1,0
BOT
0,54.233
V
0,-3.41653823852539
V
-1,0
BOT
0,54.2396666666667
V
0,-3.42035293579102
V
-1,0
BOT
0,54.2463333333333
V
0,-3.42178344726562
V
-1,0
BOT
0,54.253
V
0,-3.41987609863281
V
-1,0
BOT
0,54.2596666666667
V
0,-3.4174919128418
V
-1,0
BOT
0,54.2663333333333
V
0,-3.41367721557617
V
-1,0
BOT
0,54.273
V
0,-3.40652465820312
V
-1,0
BOT
0,54.2796666666667
V
0,-3.39555740356445
V
-1,0
BOT
0,54.2863333333333
V
0,-3.38125228881836
V
-1,0
BOT
0,54.293
V
0,-3.36313247680664
V
-1,0
BOT
0,54.2996666666667
V
0,-3.34024429321289
V
-1,0
BOT
0,54.3063333333333
V
0,-3.31497192382812
V
-1,0
BOT
0,54.313
V
0,-3.28588485717773
V
-1,0
BOT
0,54.3196666666667
V
0,-3.25441360473633
V
-1,0
BOT
0,54.3263333333333
V
0,-3.22198867797852
V
-1,0
BOT
0,54.333
V
0,-3.18670272827148
V
-1,0
BOT
0,54.3396666666667
V
0,-3.14712524414062
V
-1,0
BOT
0,54.3463333333333
V
0,-3.10230255126953
V
-1,0
BOT
0,54.353
V
0,-3.05414199829102
V
-1,0
BOT
0,54.3596666666667
V
0,-3.00502777099609
V
-1,0
BOT
0,54.3663333333333
V
0,-2.95305252075195
V
-1,0
BOT
0,54.373
V
0,-2.89821624755859
V
-1,0
BOT
0,54.3796666666667
V
0,-2.84242630004883
V
-1,0
BOT
0,54.3863333333333
V
0,-2.78854370117187
V
-1,0
BOT
0,54.393
V
0,-2.73609161376953
V
-1,0
BOT
0,54.3996666666667
V
0,-2.68316268920898
V
-1,0
BOT
0,54.4063333333333
V
0,-2.63357162475586
V
-1,0
BOT
0,54.413
V
0,-2.58827209472656
V
-1,0
BOT
0,54.4196666666667
V
0,-2.54631042480469
V
-1,0
BOT
0,54.4263333333334
V
0,-2.50720977783203
V
-1,0
BOT
0,54.433
V
0,-2.47049331665039
V
-1,0
BOT
0,54.4396666666667
V
0,-2.43759155273437
V
-1,0
BOT
0,54.4463333333333
V
0,-2.40755081176758
V
-1,0
BOT
0,54.453
V
0,-2.38132476806641
V
-1,0
BOT
0,54.4596666666667
V
0,-2.36225128173828
V
-1,0
BOT
0,54.4663333333333
V
0,-2.35080718994141
V
-1,0
BOT
0,54.473
V
0,-2.34508514404297
V
-1,0
BOT
0,54.4796666666667
V
0,-2.34317779541016
V
-1,0
BOT
0,54.4863333333334
V
0,-2.34699249267578
V
-1,0
BOT
0,54.493
V
0,-2.35939025878906
V
-1,0
BOT
0,54.4996666666667
V
0,-2.37894058227539
V
-1,0
BOT
0,54.5063333333334
V
0,-2.40373611450195
V
-1,0
BOT
0,54.513
V
0,-2.43663787841797
V
-1,0
BOT
0,54.5196666666667
V
0,-2.47859954833984
V
-1,0
BOT
0,54.5263333333334
V
0,-2.52723693847656
V
-1,0
BOT
0,54.533
V
0,-2.57968902587891
V
-1,0
BOT
0,54.5396666666667
V
0,-2.63404846191406
V
-1,0
BOT
0,54.5463333333333
V
0,-2.69269943237305
V
-1,0
BOT
0,54.553
V
0,-2.75659561157227
V
-1,0
BOT
0,54.5596666666667
V
0,-2.82573699951172
V
-1,0
BOT
0,54.5663333333333
V
0,-2.89630889892578
V
-1,0
BOT
0,54.573
V
0,-2.96878814697266
V
-1,0
BOT
0,54.5796666666667
V
0,-3.04460525512695
V
-1,0
BOT
0,54.5863333333333
V
0,-3.12232971191406
V
-1,0
BOT
0,54.593
V
0,-3.20100784301758
V
-1,0
BOT
0,54.5996666666667
V
0,-3.27634811401367
V
-1,0
BOT
0,54.6063333333333
V
0,-3.35073471069336
V
-1,0
BOT
0,54.613
V
0,-3.42512130737305
V
-1,0
BOT
0,54.6196666666667
V
0,-3.49998474121094
V
-1,0
BOT
0,54.6263333333333
V
0,-3.57532501220703
V
-1,0
BOT
0,54.633
V
0,-3.64780426025391
V
-1,0
BOT
0,54.6396666666667
V
0,-3.71789932250977
V
-1,0
BOT
0,54.6463333333333
V
0,-3.78608703613281
V
-1,0
BOT
0,54.653
V
0,-3.85379791259766
V
-1,0
BOT
0,54.6596666666667
V
0,-3.91817092895508
V
-1,0
BOT
0,54.6663333333333
V
0,-3.97634506225586
V
-1,0
BOT
0,54.673
V
0,-4.03022766113281
V
-1,0
BOT
0,54.6796666666667
V
0,-4.08363342285156
V
-1,0
BOT
0,54.6863333333333
V
0,-4.13608551025391
V
-1,0
BOT
0,54.693
V
0,-4.18424606323242
V
-1,0
BOT
0,54.6996666666667
V
0,-4.2262077331543
V
-1,0
BOT
0,54.7063333333333
V
0,-4.26483154296875
V
-1,0
BOT
0,54.713
V
0,-4.30107116699219
V
-1,0
BOT
0,54.7196666666667
V
0,-4.33492660522461
V
-1,0
BOT
0,54.7263333333333
V
0,-4.36592102050781
V
-1,0
BOT
0,54.733
V
0,-4.3950080871582
V
-1,0
BOT
0,54.7396666666667
V
0,-4.42361831665039
V
-1,0
BOT
0,54.7463333333333
V
0,-4.44936752319336
V
-1,0
BOT
0,54.753
V
0,-4.47368621826172
V
-1,0
BOT
0,54.7596666666667
V
0,-4.49371337890625
V
-1,0
BOT
0,54.7663333333333
V
0,-4.50992584228516
V
-1,0
BOT
0,54.773
V
0,-4.52041625976563
V
-1,0
BOT
0,54.7796666666667
V
0,-4.52518463134766
V
-1,0
BOT
0,54.7863333333333
V
0,-4.52661514282227
V
-1,0
BOT
0,54.793
V
0,-4.52613830566406
V
-1,0
BOT
0,54.7996666666667
V
0,-4.52423095703125
V
-1,0
BOT
0,54.8063333333334
V
0,-4.52136993408203
V
-1,0
BOT
0,54.813
V
0,-4.51850891113281
V
-1,0
BOT
0,54.8196666666667
V
0,-4.51850891113281
V
-1,0
BOT
0,54.8263333333333
V
0,-4.51850891113281
V
-1,0
BOT
0,54.833
V
0,-4.51755523681641
V
-1,0
BOT
0,54.8396666666667
V
0,-4.51517105102539
V
-1,0
BOT
0,54.8463333333334
V
0,-4.51421737670898
V
-1,0
BOT
0,54.853
V
0,-4.5166015625
V
-1,0
BOT
0,54.8596666666667
V
0,-4.52041625976563
V
-1,0
BOT
0,54.8663333333333
V
0,-4.52518463134766
V
-1,0
BOT
0,54.873
V
0,-4.53090667724609
V
-1,0
BOT
0,54.8796666666667
V
0,-4.53853607177734
V
-1,0
BOT
0,54.8863333333334
V
0,-4.54568862915039
V
-1,0
BOT
0,54.893
V
0,-4.55093383789063
V
-1,0
BOT
0,54.8996666666667
V
0,-4.55379486083984
V
-1,0
BOT
0,54.9063333333334
V
0,-4.55522537231445
V
-1,0
BOT
0,54.913
V
0,-4.55713272094727
V
-1,0
BOT
0,54.9196666666667
V
0,-4.55999374389648
V
-1,0
BOT
0,54.9263333333334
V
0,-4.5628547668457
V
-1,0
BOT
0,54.933
V
0,-4.56571578979492
V
-1,0
BOT
0,54.9396666666667
V
0,-4.57000732421875
V
-1,0
BOT
0,54.9463333333333
V
0,-4.57477569580078
V
-1,0
BOT
0,54.953
V
0,-4.57954406738281
V
-1,0
BOT
0,54.9596666666667
V
0,-4.58288192749023
V
-1,0
BOT
0,54.9663333333333
V
0,-4.58908081054688
V
-1,0
BOT
0,54.973
V
0,-4.59718704223633
V
-1,0
BOT
0,54.9796666666667
V
0,-4.60624694824219
V
-1,0
BOT
0,54.9863333333333
V
0,-4.61435317993164
V
-1,0
BOT
0,54.993
V
0,-4.62198257446289
V
-1,0
BOT
0,54.9996666666667
V
0,-4.63199615478516
V
-1,0
BOT
0,55.0063333333333
V
0,-4.63962554931641
V
-1,0
BOT
0,55.013
V
0,-4.64487075805664
V
-1,0
BOT
0,55.0196666666667
V
0,-4.64725494384766
V
-1,0
BOT
0,55.0263333333333
V
0,-4.65011596679688
V
-1,0
BOT
0,55.033
V
0,-4.6539306640625
V
-1,0
BOT
0,55.0396666666667
V
0,-4.65822219848633
V
-1,0
BOT
[truncated: 72,222 more chars]
