# Supplementary material for: Traceability and Quality Control in Traditional Chinese Medicine: From Chemical Fingerprint to Two-Dimensional Barcode
Source: Evid Based Complement Alternat Med. 2015 May 18;2015:251304. doi: 10.1155/2015/251304 (PMC4451286; doi:10.1155/2015/251304)
Supplement: Supplementary file 1 — Supplementary Table S1: shows the main difference between the one dimension and two-dimensional code. Supplementary Table S2: shows a total of 53 types of one dimension codes and 14 types of two-dimensional codes tested in this study. [file 251304.f1.zip › file-s1/yinyanghuo.DIF]

TABLE
0,1
"HP ChemStation DIF Output"
VECTORS
0,2
""
TUPLES
0,9001   
""
DATA
0,0
""
-1,0
BOT
0,-0.0395
V
0,-0.0357627868652344
V
-1,0
BOT
0,-0.0328333333333333
V
0,-0.0357627868652344
V
-1,0
BOT
0,-0.0261666666666667
V
0,-0.0352859497070312
V
-1,0
BOT
0,-0.0195
V
0,-0.0314712524414062
V
-1,0
BOT
0,-0.0128333333333333
V
0,-0.02288818359375
V
-1,0
BOT
0,-0.00616666666666667
V
0,-0.0100135803222656
V
-1,0
BOT
0,0.000500000000000001
V
0,0.00429153442382813
V
-1,0
BOT
0,0.00716666666666667
V
0,0.019073486328125
V
-1,0
BOT
0,0.0138333333333333
V
0,0.0333786010742187
V
-1,0
BOT
0,0.0205
V
0,0.0443458557128906
V
-1,0
BOT
0,0.0271666666666667
V
0,0.0491142272949219
V
-1,0
BOT
0,0.0338333333333333
V
0,0.0481605529785156
V
-1,0
BOT
0,0.0405
V
0,0.0443458557128906
V
-1,0
BOT
0,0.0471666666666667
V
0,0.0391006469726562
V
-1,0
BOT
0,0.0538333333333333
V
0,0.0329017639160156
V
-1,0
BOT
0,0.0605
V
0,0.0276565551757812
V
-1,0
BOT
0,0.0671666666666667
V
0,0.02288818359375
V
-1,0
BOT
0,0.0738333333333333
V
0,0.0195503234863281
V
-1,0
BOT
0,0.0805
V
0,0.0147819519042969
V
-1,0
BOT
0,0.0871666666666667
V
0,0.0100135803222656
V
-1,0
BOT
0,0.0938333333333333
V
0,0.00476837158203125
V
-1,0
BOT
0,0.1005
V
0,0
V
-1,0
BOT
0,0.107166666666667
V
0,-0.003814697265625
V
-1,0
BOT
0,0.113833333333333
V
0,-0.00619888305664063
V
-1,0
BOT
0,0.1205
V
0,-0.00810623168945313
V
-1,0
BOT
0,0.127166666666667
V
0,-0.0095367431640625
V
-1,0
BOT
0,0.133833333333333
V
0,-0.0104904174804687
V
-1,0
BOT
0,0.1405
V
0,-0.0104904174804687
V
-1,0
BOT
0,0.147166666666667
V
0,-0.0104904174804687
V
-1,0
BOT
0,0.153833333333333
V
0,-0.011444091796875
V
-1,0
BOT
0,0.1605
V
0,-0.0128746032714844
V
-1,0
BOT
0,0.167166666666667
V
0,-0.0143051147460937
V
-1,0
BOT
0,0.173833333333333
V
0,-0.0166893005371094
V
-1,0
BOT
0,0.1805
V
0,-0.0185966491699219
V
-1,0
BOT
0,0.187166666666667
V
0,-0.0209808349609375
V
-1,0
BOT
0,0.193833333333333
V
0,-0.0224113464355469
V
-1,0
BOT
0,0.2005
V
0,-0.0238418579101562
V
-1,0
BOT
0,0.207166666666667
V
0,-0.0243186950683594
V
-1,0
BOT
0,0.213833333333333
V
0,-0.0243186950683594
V
-1,0
BOT
0,0.2205
V
0,-0.0243186950683594
V
-1,0
BOT
0,0.227166666666667
V
0,-0.0247955322265625
V
-1,0
BOT
0,0.233833333333333
V
0,-0.0252723693847656
V
-1,0
BOT
0,0.2405
V
0,-0.0262260437011719
V
-1,0
BOT
0,0.247166666666667
V
0,-0.0271797180175781
V
-1,0
BOT
0,0.253833333333333
V
0,-0.0286102294921875
V
-1,0
BOT
0,0.2605
V
0,-0.030517578125
V
-1,0
BOT
0,0.267166666666667
V
0,-0.0329017639160156
V
-1,0
BOT
0,0.273833333333333
V
0,-0.0357627868652344
V
-1,0
BOT
0,0.2805
V
0,-0.03814697265625
V
-1,0
BOT
0,0.287166666666667
V
0,-0.0405311584472656
V
-1,0
BOT
0,0.293833333333333
V
0,-0.0433921813964844
V
-1,0
BOT
0,0.3005
V
0,-0.0457763671875
V
-1,0
BOT
0,0.307166666666667
V
0,-0.0472068786621094
V
-1,0
BOT
0,0.313833333333333
V
0,-0.0476837158203125
V
-1,0
BOT
0,0.3205
V
0,-0.0472068786621094
V
-1,0
BOT
0,0.327166666666667
V
0,-0.0457763671875
V
-1,0
BOT
0,0.333833333333333
V
0,-0.0438690185546875
V
-1,0
BOT
0,0.3405
V
0,-0.041961669921875
V
-1,0
BOT
0,0.347166666666667
V
0,-0.0410079956054688
V
-1,0
BOT
0,0.353833333333333
V
0,-0.0410079956054688
V
-1,0
BOT
0,0.3605
V
0,-0.041961669921875
V
-1,0
BOT
0,0.367166666666667
V
0,-0.0433921813964844
V
-1,0
BOT
0,0.373833333333333
V
0,-0.0452995300292969
V
-1,0
BOT
0,0.3805
V
0,-0.0476837158203125
V
-1,0
BOT
0,0.387166666666667
V
0,-0.0505447387695313
V
-1,0
BOT
0,0.393833333333333
V
0,-0.05340576171875
V
-1,0
BOT
0,0.4005
V
0,-0.0557899475097656
V
-1,0
BOT
0,0.407166666666667
V
0,-0.057220458984375
V
-1,0
BOT
0,0.413833333333333
V
0,-0.0576972961425781
V
-1,0
BOT
0,0.4205
V
0,-0.0586509704589844
V
-1,0
BOT
0,0.427166666666667
V
0,-0.0591278076171875
V
-1,0
BOT
0,0.433833333333333
V
0,-0.0596046447753906
V
-1,0
BOT
0,0.4405
V
0,-0.0596046447753906
V
-1,0
BOT
0,0.447166666666667
V
0,-0.0600814819335938
V
-1,0
BOT
0,0.453833333333333
V
0,-0.06103515625
V
-1,0
BOT
0,0.4605
V
0,-0.0624656677246094
V
-1,0
BOT
0,0.467166666666667
V
0,-0.0643730163574219
V
-1,0
BOT
0,0.473833333333333
V
0,-0.0653266906738281
V
-1,0
BOT
0,0.4805
V
0,-0.0667572021484375
V
-1,0
BOT
0,0.487166666666667
V
0,-0.0677108764648438
V
-1,0
BOT
0,0.493833333333333
V
0,-0.0677108764648438
V
-1,0
BOT
0,0.5005
V
0,-0.0667572021484375
V
-1,0
BOT
0,0.507166666666667
V
0,-0.0653266906738281
V
-1,0
BOT
0,0.513833333333333
V
0,-0.0638961791992188
V
-1,0
BOT
0,0.5205
V
0,-0.0629425048828125
V
-1,0
BOT
0,0.527166666666667
V
0,-0.0624656677246094
V
-1,0
BOT
0,0.533833333333333
V
0,-0.0629425048828125
V
-1,0
BOT
0,0.5405
V
0,-0.0624656677246094
V
-1,0
BOT
0,0.547166666666667
V
0,-0.06103515625
V
-1,0
BOT
0,0.553833333333333
V
0,-0.0600814819335938
V
-1,0
BOT
0,0.5605
V
0,-0.0600814819335938
V
-1,0
BOT
0,0.567166666666667
V
0,-0.06103515625
V
-1,0
BOT
0,0.573833333333333
V
0,-0.0615119934082031
V
-1,0
BOT
0,0.5805
V
0,-0.0629425048828125
V
-1,0
BOT
0,0.587166666666667
V
0,-0.064849853515625
V
-1,0
BOT
0,0.593833333333333
V
0,-0.0662803649902344
V
-1,0
BOT
0,0.6005
V
0,-0.0672340393066406
V
-1,0
BOT
0,0.607166666666667
V
0,-0.0672340393066406
V
-1,0
BOT
0,0.613833333333333
V
0,-0.0662803649902344
V
-1,0
BOT
0,0.6205
V
0,-0.064849853515625
V
-1,0
BOT
0,0.627166666666667
V
0,-0.0638961791992188
V
-1,0
BOT
0,0.633833333333333
V
0,-0.0634193420410156
V
-1,0
BOT
0,0.6405
V
0,-0.0634193420410156
V
-1,0
BOT
0,0.647166666666667
V
0,-0.0624656677246094
V
-1,0
BOT
0,0.653833333333333
V
0,-0.0624656677246094
V
-1,0
BOT
0,0.6605
V
0,-0.0634193420410156
V
-1,0
BOT
0,0.667166666666667
V
0,-0.064849853515625
V
-1,0
BOT
0,0.673833333333333
V
0,-0.0658035278320313
V
-1,0
BOT
0,0.6805
V
0,-0.0662803649902344
V
-1,0
BOT
0,0.687166666666667
V
0,-0.0672340393066406
V
-1,0
BOT
0,0.693833333333333
V
0,-0.06866455078125
V
-1,0
BOT
0,0.7005
V
0,-0.0700950622558594
V
-1,0
BOT
0,0.707166666666667
V
0,-0.0710487365722656
V
-1,0
BOT
0,0.713833333333333
V
0,-0.0715255737304688
V
-1,0
BOT
0,0.7205
V
0,-0.0710487365722656
V
-1,0
BOT
0,0.727166666666667
V
0,-0.0705718994140625
V
-1,0
BOT
0,0.733833333333334
V
0,-0.0700950622558594
V
-1,0
BOT
0,0.7405
V
0,-0.0696182250976563
V
-1,0
BOT
0,0.747166666666667
V
0,-0.0696182250976563
V
-1,0
BOT
0,0.753833333333333
V
0,-0.0705718994140625
V
-1,0
BOT
0,0.7605
V
0,-0.0710487365722656
V
-1,0
BOT
0,0.767166666666667
V
0,-0.0720024108886719
V
-1,0
BOT
0,0.773833333333333
V
0,-0.0729560852050781
V
-1,0
BOT
0,0.7805
V
0,-0.0729560852050781
V
-1,0
BOT
0,0.787166666666667
V
0,-0.072479248046875
V
-1,0
BOT
0,0.793833333333333
V
0,-0.0720024108886719
V
-1,0
BOT
0,0.8005
V
0,-0.0710487365722656
V
-1,0
BOT
0,0.807166666666667
V
0,-0.0710487365722656
V
-1,0
BOT
0,0.813833333333333
V
0,-0.0715255737304688
V
-1,0
BOT
0,0.8205
V
0,-0.0734329223632813
V
-1,0
BOT
0,0.827166666666667
V
0,-0.0743865966796875
V
-1,0
BOT
0,0.833833333333334
V
0,-0.0734329223632813
V
-1,0
BOT
0,0.8405
V
0,-0.0734329223632813
V
-1,0
BOT
0,0.847166666666667
V
0,-0.0739097595214844
V
-1,0
BOT
0,0.853833333333333
V
0,-0.0739097595214844
V
-1,0
BOT
0,0.8605
V
0,-0.0734329223632813
V
-1,0
BOT
0,0.867166666666667
V
0,-0.0734329223632813
V
-1,0
BOT
0,0.873833333333333
V
0,-0.0748634338378906
V
-1,0
BOT
0,0.8805
V
0,-0.0762939453125
V
-1,0
BOT
0,0.887166666666667
V
0,-0.0772476196289063
V
-1,0
BOT
0,0.893833333333333
V
0,-0.0782012939453125
V
-1,0
BOT
0,0.9005
V
0,-0.080108642578125
V
-1,0
BOT
0,0.907166666666667
V
0,-0.0815391540527344
V
-1,0
BOT
0,0.913833333333333
V
0,-0.0815391540527344
V
-1,0
BOT
0,0.9205
V
0,-0.0805854797363281
V
-1,0
BOT
0,0.927166666666667
V
0,-0.0796318054199219
V
-1,0
BOT
0,0.933833333333334
V
0,-0.0782012939453125
V
-1,0
BOT
0,0.9405
V
0,-0.0762939453125
V
-1,0
BOT
0,0.947166666666667
V
0,-0.0739097595214844
V
-1,0
BOT
0,0.953833333333333
V
0,-0.0734329223632813
V
-1,0
BOT
0,0.9605
V
0,-0.0743865966796875
V
-1,0
BOT
0,0.967166666666667
V
0,-0.0758171081542969
V
-1,0
BOT
0,0.973833333333334
V
0,-0.0762939453125
V
-1,0
BOT
0,0.9805
V
0,-0.0758171081542969
V
-1,0
BOT
0,0.987166666666667
V
0,-0.0762939453125
V
-1,0
BOT
0,0.993833333333333
V
0,-0.0767707824707031
V
-1,0
BOT
0,1.0005
V
0,-0.0772476196289063
V
-1,0
BOT
0,1.00716666666667
V
0,-0.0767707824707031
V
-1,0
BOT
0,1.01383333333333
V
0,-0.0762939453125
V
-1,0
BOT
0,1.0205
V
0,-0.0753402709960938
V
-1,0
BOT
0,1.02716666666667
V
0,-0.0734329223632813
V
-1,0
BOT
0,1.03383333333333
V
0,-0.0715255737304688
V
-1,0
BOT
0,1.0405
V
0,-0.0658035278320313
V
-1,0
BOT
0,1.04716666666667
V
0,-0.0367164611816406
V
-1,0
BOT
0,1.05383333333333
V
0,0.0643730163574219
V
-1,0
BOT
0,1.0605
V
0,0.29754638671875
V
-1,0
BOT
0,1.06716666666667
V
0,0.693798065185547
V
-1,0
BOT
0,1.07383333333333
V
0,1.21974945068359
V
-1,0
BOT
0,1.0805
V
0,1.78289413452148
V
-1,0
BOT
0,1.08716666666667
V
0,2.26688385009766
V
-1,0
BOT
0,1.09383333333333
V
0,2.56538391113281
V
-1,0
BOT
0,1.1005
V
0,2.61020660400391
V
-1,0
BOT
0,1.10716666666667
V
0,2.39372253417969
V
-1,0
BOT
0,1.11383333333333
V
0,1.97982788085937
V
-1,0
BOT
0,1.1205
V
0,1.48200988769531
V
-1,0
BOT
0,1.12716666666667
V
0,1.01327896118164
V
-1,0
BOT
0,1.13383333333333
V
0,0.642776489257813
V
-1,0
BOT
0,1.1405
V
0,0.383377075195312
V
-1,0
BOT
0,1.14716666666667
V
0,0.215053558349609
V
-1,0
BOT
0,1.15383333333333
V
0,0.110149383544922
V
-1,0
BOT
0,1.1605
V
0,0.0467300415039063
V
-1,0
BOT
0,1.16716666666667
V
0,0.00905990600585938
V
-1,0
BOT
0,1.17383333333333
V
0,-0.0143051147460937
V
-1,0
BOT
0,1.1805
V
0,-0.0290870666503906
V
-1,0
BOT
0,1.18716666666667
V
0,-0.0386238098144531
V
-1,0
BOT
0,1.19383333333333
V
0,-0.0443458557128906
V
-1,0
BOT
0,1.2005
V
0,-0.0476837158203125
V
-1,0
BOT
0,1.20716666666667
V
0,-0.0500679016113281
V
-1,0
BOT
0,1.21383333333333
V
0,-0.0519752502441406
V
-1,0
BOT
0,1.2205
V
0,-0.05340576171875
V
-1,0
BOT
0,1.22716666666667
V
0,-0.0553131103515625
V
-1,0
BOT
0,1.23383333333333
V
0,-0.0576972961425781
V
-1,0
BOT
0,1.2405
V
0,-0.0596046447753906
V
-1,0
BOT
0,1.24716666666667
V
0,-0.0615119934082031
V
-1,0
BOT
0,1.25383333333333
V
0,-0.0629425048828125
V
-1,0
BOT
0,1.2605
V
0,-0.0638961791992188
V
-1,0
BOT
0,1.26716666666667
V
0,-0.0638961791992188
V
-1,0
BOT
0,1.27383333333333
V
0,-0.0624656677246094
V
-1,0
BOT
0,1.2805
V
0,-0.0600814819335938
V
-1,0
BOT
0,1.28716666666667
V
0,-0.0581741333007813
V
-1,0
BOT
0,1.29383333333333
V
0,-0.057220458984375
V
-1,0
BOT
0,1.3005
V
0,-0.0562667846679688
V
-1,0
BOT
0,1.30716666666667
V
0,-0.0543594360351563
V
-1,0
BOT
0,1.31383333333333
V
0,-0.0519752502441406
V
-1,0
BOT
0,1.3205
V
0,-0.0486373901367188
V
-1,0
BOT
0,1.32716666666667
V
0,-0.0438690185546875
V
-1,0
BOT
0,1.33383333333333
V
0,-0.0371932983398437
V
-1,0
BOT
0,1.3405
V
0,-0.0290870666503906
V
-1,0
BOT
0,1.34716666666667
V
0,-0.0214576721191406
V
-1,0
BOT
0,1.35383333333333
V
0,-0.0133514404296875
V
-1,0
BOT
0,1.3605
V
0,-0.00429153442382813
V
-1,0
BOT
0,1.36716666666667
V
0,0.00667572021484375
V
-1,0
BOT
0,1.37383333333333
V
0,0.0252723693847656
V
-1,0
BOT
0,1.3805
V
0,0.0543594360351563
V
-1,0
BOT
0,1.38716666666667
V
0,0.0958442687988281
V
-1,0
BOT
0,1.39383333333333
V
0,0.147819519042969
V
-1,0
BOT
0,1.4005
V
0,0.207424163818359
V
-1,0
BOT
0,1.40716666666667
V
0,0.268459320068359
V
-1,0
BOT
0,1.41383333333333
V
0,0.323295593261719
V
-1,0
BOT
0,1.4205
V
0,0.367641448974609
V
-1,0
BOT
0,1.42716666666667
V
0,0.398159027099609
V
-1,0
BOT
0,1.43383333333333
V
0,0.416755676269531
V
-1,0
BOT
0,1.4405
V
0,0.42724609375
V
-1,0
BOT
0,1.44716666666667
V
0,0.43487548828125
V
-1,0
BOT
0,1.45383333333333
V
0,0.442981719970703
V
-1,0
BOT
0,1.4605
V
0,0.454425811767578
V
-1,0
BOT
0,1.46716666666667
V
0,0.469684600830078
V
-1,0
BOT
0,1.47383333333333
V
0,0.490188598632813
V
-1,0
BOT
0,1.4805
V
0,0.513553619384766
V
-1,0
BOT
0,1.48716666666667
V
0,0.540256500244141
V
-1,0
BOT
0,1.49383333333333
V
0,0.569343566894531
V
-1,0
BOT
0,1.5005
V
0,0.602245330810547
V
-1,0
BOT
0,1.50716666666667
V
0,0.639438629150391
V
-1,0
BOT
0,1.51383333333333
V
0,0.682830810546875
V
-1,0
BOT
0,1.5205
V
0,0.731945037841797
V
-1,0
BOT
0,1.52716666666667
V
0,0.786781311035156
V
-1,0
BOT
0,1.53383333333333
V
0,0.844001770019531
V
-1,0
BOT
0,1.5405
V
0,0.901699066162109
V
-1,0
BOT
0,1.54716666666667
V
0,0.957965850830078
V
-1,0
BOT
0,1.55383333333333
V
0,1.01232528686523
V
-1,0
BOT
0,1.5605
V
0,1.06334686279297
V
-1,0
BOT
0,1.56716666666667
V
0,1.11198425292969
V
-1,0
BOT
0,1.57383333333333
V
0,1.1601448059082
V
-1,0
BOT
0,1.5805
V
0,1.20878219604492
V
-1,0
BOT
0,1.58716666666667
V
0,1.25646591186523
V
-1,0
BOT
0,1.59383333333333
V
0,1.30319595336914
V
-1,0
BOT
0,1.6005
V
0,1.34944915771484
V
-1,0
BOT
0,1.60716666666667
V
0,1.39522552490234
V
-1,0
BOT
0,1.61383333333333
V
0,1.44004821777344
V
-1,0
BOT
0,1.6205
V
0,1.48200988769531
V
-1,0
BOT
0,1.62716666666667
V
0,1.52015686035156
V
-1,0
BOT
0,1.63383333333333
V
0,1.55210494995117
V
-1,0
BOT
0,1.6405
V
0,1.57785415649414
V
-1,0
BOT
0,1.64716666666667
V
0,1.59692764282227
V
-1,0
BOT
0,1.65383333333333
V
0,1.61075592041016
V
-1,0
BOT
0,1.6605
V
0,1.62124633789062
V
-1,0
BOT
0,1.66716666666667
V
0,1.63030624389648
V
-1,0
BOT
0,1.67383333333333
V
0,1.64222717285156
V
-1,0
BOT
0,1.6805
V
0,1.65891647338867
V
-1,0
BOT
0,1.68716666666667
V
0,1.68132781982422
V
-1,0
BOT
0,1.69383333333333
V
0,1.70993804931641
V
-1,0
BOT
0,1.7005
V
0,1.74474716186523
V
-1,0
BOT
0,1.70716666666667
V
0,1.78623199462891
V
-1,0
BOT
0,1.71383333333333
V
0,1.83439254760742
V
-1,0
BOT
0,1.7205
V
0,1.88875198364258
V
-1,0
BOT
0,1.72716666666667
V
0,1.94883346557617
V
-1,0
BOT
0,1.73383333333333
V
0,2.0136833190918
V
-1,0
BOT
0,1.7405
V
0,2.08330154418945
V
-1,0
BOT
0,1.74716666666667
V
0,2.15530395507812
V
-1,0
BOT
0,1.75383333333333
V
0,2.227783203125
V
-1,0
BOT
0,1.7605
V
0,2.29740142822266
V
-1,0
BOT
0,1.76716666666667
V
0,2.36320495605469
V
-1,0
BOT
0,1.77383333333333
V
0,2.42424011230469
V
-1,0
BOT
0,1.7805
V
0,2.48193740844727
V
-1,0
BOT
0,1.78716666666667
V
0,2.53677368164062
V
-1,0
BOT
0,1.79383333333333
V
0,2.59017944335937
V
-1,0
BOT
0,1.8005
V
0,2.64310836791992
V
-1,0
BOT
0,1.80716666666667
V
0,2.69699096679687
V
-1,0
BOT
0,1.81383333333333
V
0,2.75087356567383
V
-1,0
BOT
0,1.8205
V
0,2.80475616455078
V
-1,0
BOT
0,1.82716666666667
V
0,2.85816192626953
V
-1,0
BOT
0,1.83383333333333
V
0,2.91156768798828
V
-1,0
BOT
0,1.8405
V
0,2.96545028686523
V
-1,0
BOT
0,1.84716666666667
V
0,3.021240234375
V
-1,0
BOT
0,1.85383333333333
V
0,3.07941436767578
V
-1,0
BOT
0,1.8605
V
0,3.14140319824219
V
-1,0
BOT
0,1.86716666666667
V
0,3.20720672607422
V
-1,0
BOT
0,1.87383333333333
V
0,3.27682495117187
V
-1,0
BOT
0,1.8805
V
0,3.35168838500977
V
-1,0
BOT
0,1.88716666666667
V
0,3.43179702758789
V
-1,0
BOT
0,1.89383333333333
V
0,3.51810455322266
V
-1,0
BOT
0,1.9005
V
0,3.61299514770508
V
-1,0
BOT
0,1.90716666666667
V
0,3.71837615966797
V
-1,0
BOT
0,1.91383333333333
V
0,3.83806228637695
V
-1,0
BOT
0,1.9205
V
0,3.97396087646484
V
-1,0
BOT
0,1.92716666666667
V
0,4.13227081298828
V
-1,0
BOT
0,1.93383333333333
V
0,4.31966781616211
V
-1,0
BOT
0,1.9405
V
0,4.5466423034668
V
-1,0
BOT
0,1.94716666666667
V
0,4.82511520385742
V
-1,0
BOT
0,1.95383333333333
V
0,5.16271591186523
V
-1,0
BOT
0,1.9605
V
0,5.55419921875
V
-1,0
BOT
0,1.96716666666667
V
0,5.9814453125
V
-1,0
BOT
0,1.97383333333333
V
0,6.42061233520508
V
-1,0
BOT
0,1.9805
V
0,6.84928894042969
V
-1,0
BOT
0,1.98716666666667
V
0,7.25126266479492
V
-1,0
BOT
0,1.99383333333333
V
0,7.62033462524414
V
-1,0
BOT
0,2.0005
V
0,7.96890258789063
V
-1,0
BOT
0,2.00716666666667
V
0,8.32557678222656
V
-1,0
BOT
0,2.01383333333333
V
0,8.72611999511719
V
-1,0
BOT
0,2.0205
V
0,9.20009613037109
V
-1,0
BOT
0,2.02716666666667
V
0,9.765625
V
-1,0
BOT
0,2.03383333333333
V
0,10.4274749755859
V
-1,0
BOT
0,2.0405
V
0,11.1799240112305
V
-1,0
BOT
0,2.04716666666667
V
0,12.0139122009277
V
-1,0
BOT
0,2.05383333333333
V
0,12.937068939209
V
-1,0
BOT
0,2.0605
V
0,13.9970779418945
V
-1,0
BOT
0,2.06716666666667
V
0,15.2826309204102
V
-1,0
BOT
0,2.07383333333333
V
0,16.8800354003906
V
-1,0
BOT
0,2.0805
V
0,18.8360214233398
V
-1,0
BOT
0,2.08716666666667
V
0,21.1777687072754
V
-1,0
BOT
0,2.09383333333333
V
0,23.9682197570801
V
-1,0
BOT
0,2.1005
V
0,27.3241996765137
V
-1,0
BOT
0,2.10716666666667
V
0,31.4064025878906
V
-1,0
BOT
0,2.11383333333333
V
0,36.4198684692383
V
-1,0
BOT
0,2.1205
V
0,42.5448417663574
V
-1,0
BOT
0,2.12716666666667
V
0,49.7927665710449
V
-1,0
BOT
0,2.13383333333333
V
0,57.8899383544922
V
-1,0
BOT
0,2.1405
V
0,66.2927627563477
V
-1,0
BOT
0,2.14716666666667
V
0,74.3117332458496
V
-1,0
BOT
0,2.15383333333333
V
0,81.2439918518066
V
-1,0
BOT
0,2.1605
V
0,86.5316390991211
V
-1,0
BOT
0,2.16716666666667
V
0,89.9085998535156
V
-1,0
BOT
0,2.17383333333333
V
0,91.4425849914551
V
-1,0
BOT
0,2.1805
V
0,91.4106369018555
V
-1,0
BOT
0,2.18716666666667
V
0,90.1603698730469
V
-1,0
BOT
0,2.19383333333333
V
0,88.0379676818848
V
-1,0
BOT
0,2.2005
V
0,85.3366851806641
V
-1,0
BOT
0,2.20716666666667
V
0,82.1990966796875
V
-1,0
BOT
0,2.21383333333333
V
0,78.6142349243164
V
-1,0
BOT
0,2.2205
V
0,74.547290802002
V
-1,0
BOT
0,2.22716666666667
V
0,70.0201988220215
V
-1,0
BOT
0,2.23383333333333
V
0,65.0982856750488
V
-1,0
BOT
0,2.2405
V
0,59.8649978637695
V
-1,0
BOT
0,2.24716666666667
V
0,54.4619560241699
V
-1,0
BOT
0,2.25383333333333
V
0,49.0975379943848
V
-1,0
BOT
0,2.2605
V
0,43.973445892334
V
-1,0
BOT
0,2.26716666666667
V
0,39.2346382141113
V
-1,0
BOT
0,2.27383333333333
V
0,34.9655151367187
V
-1,0
BOT
0,2.2805
V
0,31.2108993530273
V
-1,0
BOT
0,2.28716666666667
V
0,27.9865264892578
V
-1,0
BOT
0,2.29383333333333
V
0,25.2828598022461
V
-1,0
BOT
0,2.3005
V
0,23.0679512023926
V
-1,0
BOT
0,2.30716666666667
V
0,21.2869644165039
V
-1,0
BOT
0,2.31383333333333
V
0,19.8640823364258
V
-1,0
BOT
0,2.3205
V
0,18.7158584594727
V
-1,0
BOT
0,2.32716666666667
V
0,17.763614654541
V
-1,0
BOT
0,2.33383333333333
V
0,16.9439315795898
V
-1,0
BOT
0,2.3405
V
0,16.2105560302734
V
-1,0
BOT
0,2.34716666666667
V
0,15.5396461486816
V
-1,0
BOT
0,2.35383333333333
V
0,14.927864074707
V
-1,0
BOT
0,2.3605
V
0,14.3866539001465
V
-1,0
BOT
0,2.36716666666667
V
0,13.9336585998535
V
-1,0
BOT
0,2.37383333333333
V
0,13.5884284973145
V
-1,0
BOT
0,2.3805
V
0,13.3757591247559
V
-1,0
BOT
0,2.38716666666667
V
0,13.3261680603027
V
-1,0
BOT
0,2.39383333333333
V
0,13.4711265563965
V
-1,0
BOT
0,2.4005
V
0,13.8311386108398
V
-1,0
BOT
0,2.40716666666667
V
0,14.4023895263672
V
-1,0
BOT
0,2.41383333333333
V
0,15.1543617248535
V
-1,0
BOT
0,2.4205
V
0,16.0365104675293
V
-1,0
BOT
0,2.42716666666667
V
0,16.9863700866699
V
-1,0
BOT
0,2.43383333333333
V
0,17.9481506347656
V
-1,0
BOT
0,2.4405
V
0,18.9309120178223
V
-1,0
BOT
0,2.44716666666667
V
0,20.0381278991699
V
-1,0
BOT
0,2.45383333333333
V
0,21.3727951049805
V
-1,0
BOT
0,2.4605
V
0,22.9296684265137
V
-1,0
BOT
0,2.46716666666667
V
0,24.5871543884277
V
-1,0
BOT
0,2.47383333333333
V
0,26.2160301208496
V
-1,0
BOT
0,2.4805
V
0,27.6908874511719
V
-1,0
BOT
0,2.48716666666667
V
0,28.8739204406738
V
-1,0
BOT
0,2.49383333333333
V
0,29.6826362609863
V
-1,0
BOT
0,2.5005
V
0,30.1694869995117
V
-1,0
BOT
0,2.50716666666667
V
0,30.491828918457
V
-1,0
BOT
0,2.51383333333333
V
0,30.7698249816895
V
-1,0
BOT
0,2.5205
V
0,31.0306549072266
V
-1,0
BOT
0,2.52716666666667
V
0,31.2404632568359
V
-1,0
BOT
0,2.53383333333333
V
0,31.3534736633301
V
-1,0
BOT
0,2.5405
V
0,31.3253402709961
V
-1,0
BOT
0,2.54716666666667
V
0,31.125545501709
V
-1,0
BOT
0,2.55383333333333
V
0,30.7440757751465
V
-1,0
BOT
0,2.5605
V
0,30.205249786377
V
-1,0
BOT
0,2.56716666666667
V
0,29.5567512512207
V
-1,0
BOT
0,2.57383333333333
V
0,28.778076171875
V
-1,0
BOT
0,2.5805
V
0,27.7485847473145
V
-1,0
BOT
0,2.58716666666667
V
0,26.3252258300781
V
-1,0
BOT
0,2.59383333333333
V
0,24.446964263916
V
-1,0
BOT
0,2.6005
V
0,22.1576690673828
V
-1,0
BOT
0,2.60716666666667
V
0,19.5341110229492
V
-1,0
BOT
0,2.61383333333333
V
0,16.7293548583984
V
-1,0
BOT
0,2.6205
V
0,13.9822959899902
V
-1,0
BOT
0,2.62716666666667
V
0,11.5323066711426
V
-1,0
BOT
0,2.63383333333333
V
0,9.52434539794922
V
-1,0
BOT
0,2.6405
V
0,7.97748565673828
V
-1,0
BOT
0,2.64716666666667
V
0,6.84165954589844
V
-1,0
BOT
0,2.65383333333333
V
0,6.03151321411133
V
-1,0
BOT
0,2.6605
V
0,5.45454025268555
V
-1,0
BOT
0,2.66716666666667
V
0,5.03396987915039
V
-1,0
BOT
0,2.67383333333333
V
0,4.71782684326172
V
-1,0
BOT
0,2.6805
V
0,4.46891784667969
V
-1,0
BOT
0,2.68716666666667
V
0,4.26340103149414
V
-1,0
BOT
0,2.69383333333333
V
0,4.08744812011719
V
-1,0
BOT
0,2.7005
V
0,3.93152236938477
V
-1,0
BOT
0,2.70716666666667
V
0,3.79228591918945
V
-1,0
BOT
0,2.71383333333333
V
0,3.66592407226562
V
-1,0
BOT
0,2.7205
V
0,3.55243682861328
V
-1,0
BOT
0,2.72716666666667
V
0,3.44944000244141
V
-1,0
BOT
0,2.73383333333333
V
0,3.35788726806641
V
-1,0
BOT
0,2.7405
V
0,3.27682495117187
V
-1,0
BOT
0,2.74716666666667
V
0,3.204345703125
V
-1,0
BOT
0,2.75383333333333
V
0,3.13949584960937
V
-1,0
BOT
0,2.7605
V
0,3.0817985534668
V
-1,0
BOT
0,2.76716666666667
V
0,3.03077697753906
V
-1,0
BOT
0,2.77383333333333
V
0,2.98643112182617
V
-1,0
BOT
0,2.7805
V
0,2.94923782348633
V
-1,0
BOT
0,2.78716666666667
V
0,2.91776657104492
V
-1,0
BOT
0,2.79383333333333
V
0,2.89154052734375
V
-1,0
BOT
0,2.8005
V
0,2.87055969238281
V
-1,0
BOT
0,2.80716666666667
V
0,2.85434722900391
V
-1,0
BOT
0,2.81383333333333
V
0,2.84194946289062
V
-1,0
BOT
0,2.8205
V
0,2.83241271972656
V
-1,0
BOT
0,2.82716666666667
V
0,2.82430648803711
V
-1,0
BOT
0,2.83383333333333
V
0,2.81763076782227
V
-1,0
BOT
0,2.8405
V
0,2.81190872192383
V
-1,0
BOT
0,2.84716666666667
V
0,2.80666351318359
V
-1,0
BOT
0,2.85383333333333
V
0,2.80189514160156
V
-1,0
BOT
0,2.8605
V
0,2.79903411865234
V
-1,0
BOT
0,2.86716666666667
V
0,2.79998779296875
V
-1,0
BOT
0,2.87383333333333
V
0,2.80380249023437
V
-1,0
BOT
0,2.8805
V
0,2.80952453613281
V
-1,0
BOT
0,2.88716666666667
V
0,2.81667709350586
V
-1,0
BOT
0,2.89383333333333
V
0,2.82478332519531
V
-1,0
BOT
0,2.9005
V
0,2.83336639404297
V
-1,0
BOT
0,2.90716666666667
V
0,2.84051895141602
V
-1,0
BOT
0,2.91383333333333
V
0,2.84767150878906
V
-1,0
BOT
0,2.9205
V
0,2.85434722900391
V
-1,0
BOT
0,2.92716666666667
V
0,2.86102294921875
V
-1,0
BOT
0,2.93383333333333
V
0,2.86865234375
V
-1,0
BOT
0,2.9405
V
0,2.87723541259766
V
-1,0
BOT
0,2.94716666666667
V
0,2.88820266723633
V
-1,0
BOT
0,2.95383333333333
V
0,2.90393829345703
V
-1,0
BOT
0,2.9605
V
0,2.92730331420898
V
-1,0
BOT
0,2.96716666666667
V
0,2.96497344970703
V
-1,0
BOT
0,2.97383333333333
V
0,3.02648544311523
V
-1,0
BOT
0,2.9805
V
0,3.12280654907227
V
-1,0
BOT
0,2.98716666666667
V
0,3.26347351074219
V
-1,0
BOT
0,2.99383333333333
V
0,3.45516204833984
V
-1,0
BOT
0,3.0005
V
0,3.70359420776367
V
-1,0
BOT
0,3.00716666666667
V
0,4.01020050048828
V
-1,0
BOT
0,3.01383333333333
V
0,4.37116622924805
V
-1,0
BOT
0,3.0205
V
0,4.77695465087891
V
-1,0
BOT
0,3.02716666666667
V
0,5.21612167358398
V
-1,0
BOT
0,3.03383333333333
V
0,5.67722320556641
V
-1,0
BOT
0,3.0405
V
0,6.15072250366211
V
-1,0
BOT
0,3.04716666666667
V
0,6.62851333618164
V
-1,0
BOT
0,3.05383333333333
V
0,7.10725784301758
V
-1,0
BOT
0,3.0605
V
0,7.58934020996094
V
-1,0
BOT
0,3.06716666666667
V
0,8.07762145996094
V
-1,0
BOT
0,3.07383333333333
V
0,8.57639312744141
V
-1,0
BOT
0,3.0805
V
0,9.08756256103516
V
-1,0
BOT
0,3.08716666666667
V
0,9.61017608642578
V
-1,0
BOT
0,3.09383333333333
V
0,10.1428031921387
V
-1,0
BOT
0,3.1005
V
0,10.6863975524902
V
-1,0
BOT
0,3.10716666666667
V
0,11.2462043762207
V
-1,0
BOT
0,3.11383333333333
V
0,11.8269920349121
V
-1,0
BOT
0,3.1205
V
0,12.4378204345703
V
-1,0
BOT
0,3.12716666666667
V
0,13.0829811096191
V
-1,0
BOT
0,3.13383333333333
V
0,13.7629508972168
V
-1,0
BOT
0,3.1405
V
0,14.4772529602051
V
-1,0
BOT
0,3.14716666666667
V
0,15.2325630187988
V
-1,0
BOT
0,3.15383333333333
V
0,16.0446166992187
V
-1,0
BOT
0,3.1605
V
0,16.9262886047363
V
-1,0
BOT
0,3.16716666666667
V
0,17.8790092468262
V
-1,0
BOT
0,3.17383333333333
V
0,18.8908576965332
V
-1,0
BOT
0,3.1805
V
0,19.9365615844727
V
-1,0
BOT
0,3.18716666666667
V
0,20.9841728210449
V
-1,0
BOT
0,3.19383333333333
V
0,22.0060348510742
V
-1,0
BOT
0,3.2005
V
0,22.9926109313965
V
-1,0
BOT
0,3.20716666666667
V
0,23.9582061767578
V
-1,0
BOT
0,3.21383333333333
V
0,24.9338150024414
V
-1,0
BOT
0,3.2205
V
0,25.9509086608887
V
-1,0
BOT
0,3.22716666666667
V
0,27.0290374755859
V
-1,0
BOT
0,3.23383333333333
V
0,28.1729698181152
V
-1,0
BOT
0,3.2405
V
0,29.3765068054199
V
-1,0
BOT
0,3.24716666666667
V
0,30.6215286254883
V
-1,0
BOT
0,3.25383333333333
V
0,31.8770408630371
V
-1,0
BOT
0,3.2605
V
0,33.1039428710937
V
-1,0
BOT
0,3.26716666666667
V
0,34.2574119567871
V
-1,0
BOT
0,3.27383333333333
V
0,35.2792739868164
V
-1,0
BOT
0,3.2805
V
0,36.102294921875
V
-1,0
BOT
0,3.28716666666667
V
0,36.6635322570801
V
-1,0
BOT
0,3.29383333333333
V
0,36.9153022766113
V
-1,0
BOT
0,3.3005
V
0,36.8266105651855
V
-1,0
BOT
0,3.30716666666667
V
0,36.3845825195312
V
-1,0
BOT
0,3.31383333333333
V
0,35.5944633483887
V
-1,0
BOT
0,3.3205
V
0,34.4815254211426
V
-1,0
BOT
0,3.32716666666667
V
0,33.0896377563477
V
-1,0
BOT
0,3.33383333333333
V
0,31.4760208129883
V
-1,0
BOT
0,3.3405
V
0,29.7064781188965
V
-1,0
BOT
0,3.34716666666667
V
0,27.8429985046387
V
-1,0
BOT
0,3.35383333333333
V
0,25.937557220459
V
-1,0
BOT
0,3.3605
V
0,24.0311622619629
V
-1,0
BOT
0,3.36716666666667
V
0,22.1538543701172
V
-1,0
BOT
0,3.37383333333333
V
0,20.3289985656738
V
-1,0
BOT
0,3.3805
V
0,18.5799598693848
V
-1,0
BOT
0,3.38716666666667
V
0,16.9377326965332
V
-1,0
BOT
0,3.39383333333333
V
0,15.4318809509277
V
-1,0
BOT
0,3.4005
V
0,14.0829086303711
V
-1,0
BOT
0,3.40716666666667
V
0,12.8951072692871
V
-1,0
BOT
0,3.41383333333333
V
0,11.8632316589355
V
-1,0
BOT
0,3.4205
V
0,10.9748840332031
V
-1,0
BOT
0,3.42716666666667
V
0,10.2152824401855
V
-1,0
BOT
0,3.43383333333333
V
0,9.57107543945313
V
-1,0
BOT
0,3.4405
V
0,9.03224945068359
V
-1,0
BOT
0,3.44716666666667
V
0,8.5902214050293
V
-1,0
BOT
0,3.45383333333333
V
0,8.23450088500977
V
-1,0
BOT
0,3.4605
V
0,7.95078277587891
V
-1,0
BOT
0,3.46716666666667
V
0,7.7214241027832
V
-1,0
BOT
0,3.47383333333333
V
0,7.53164291381836
V
-1,0
BOT
0,3.4805
V
0,7.36904144287109
V
-1,0
BOT
0,3.48716666666667
V
0,7.22408294677734
V
-1,0
BOT
0,3.49383333333333
V
0,7.09152221679688
V
-1,0
BOT
0,3.5005
V
0,6.96754455566406
V
-1,0
BOT
0,3.50716666666667
V
0,6.8507194519043
V
-1,0
BOT
0,3.51383333333333
V
0,6.73961639404297
V
-1,0
BOT
0,3.5205
V
0,6.63518905639648
V
-1,0
BOT
0,3.52716666666667
V
0,6.53839111328125
V
-1,0
BOT
0,3.53383333333333
V
0,6.45065307617188
V
-1,0
BOT
0,3.5405
V
0,6.37292861938477
V
-1,0
BOT
0,3.54716666666667
V
0,6.30474090576172
V
-1,0
BOT
0,3.55383333333333
V
0,6.24513626098633
V
-1,0
BOT
0,3.5605
V
0,6.19411468505859
V
-1,0
BOT
0,3.56716666666667
V
0,6.15024566650391
V
-1,0
BOT
0,3.57383333333333
V
0,6.11209869384766
V
-1,0
BOT
0,3.5805
V
0,6.07681274414063
V
-1,0
BOT
0,3.58716666666667
V
0,6.04391098022461
V
-1,0
BOT
0,3.59383333333333
V
0,6.011962890625
V
-1,0
BOT
0,3.6005
V
0,5.98001480102539
V
-1,0
BOT
0,3.60716666666667
V
0,5.94711303710938
V
-1,0
BOT
0,3.61383333333333
V
0,5.91421127319336
V
-1,0
BOT
0,3.6205
V
0,5.88083267211914
V
-1,0
BOT
0,3.62716666666667
V
0,5.84745407104492
V
-1,0
BOT
0,3.63383333333333
V
0,5.8135986328125
V
-1,0
BOT
0,3.6405
V
0,5.77926635742188
V
-1,0
BOT
0,3.64716666666667
V
0,5.74398040771484
V
-1,0
BOT
0,3.65383333333333
V
0,5.70774078369141
V
-1,0
BOT
0,3.6605
V
0,5.67054748535156
V
-1,0
BOT
0,3.66716666666667
V
0,5.63240051269531
V
-1,0
BOT
0,3.67383333333333
V
0,5.59282302856445
V
-1,0
BOT
0,3.6805
V
0,5.5537223815918
V
-1,0
BOT
0,3.68716666666667
V
0,5.51414489746094
V
-1,0
BOT
0,3.69383333333333
V
0,5.47361373901367
V
-1,0
BOT
0,3.7005
V
0,5.43212890625
V
-1,0
BOT
0,3.70716666666667
V
0,5.39112091064453
V
-1,0
BOT
0,3.71383333333333
V
0,5.35202026367188
V
-1,0
BOT
0,3.7205
V
0,5.31435012817383
V
-1,0
BOT
0,3.72716666666667
V
0,5.2790641784668
V
-1,0
BOT
0,3.73383333333333
V
0,5.24711608886719
V
-1,0
BOT
0,3.7405
V
0,5.2180290222168
V
-1,0
BOT
0,3.74716666666667
V
0,5.19132614135742
V
-1,0
BOT
0,3.75383333333333
V
0,5.16510009765625
V
-1,0
BOT
0,3.7605
V
0,5.14030456542969
V
-1,0
BOT
0,3.76716666666667
V
0,5.11503219604492
V
-1,0
BOT
0,3.77383333333333
V
0,5.08928298950195
V
-1,0
BOT
0,3.7805
V
0,5.06448745727539
V
-1,0
BOT
0,3.78716666666667
V
0,5.04112243652344
V
-1,0
BOT
0,3.79383333333333
V
0,5.01871109008789
V
-1,0
BOT
0,3.8005
V
0,4.99582290649414
V
-1,0
BOT
0,3.80716666666667
V
0,4.9748420715332
V
-1,0
BOT
0,3.81383333333333
V
0,4.95719909667969
V
-1,0
BOT
0,3.8205
V
0,4.94384765625
V
-1,0
BOT
0,3.82716666666667
V
0,4.93574142456055
V
-1,0
BOT
0,3.83383333333333
V
0,4.93335723876953
V
-1,0
BOT
0,3.8405
V
0,4.93812561035156
V
-1,0
BOT
0,3.84716666666667
V
0,4.94909286499023
V
-1,0
BOT
0,3.85383333333333
V
0,4.96625900268555
V
-1,0
BOT
0,3.8605
V
0,4.9896240234375
V
-1,0
BOT
0,3.86716666666667
V
0,5.01823425292969
V
-1,0
BOT
0,3.87383333333333
V
0,5.05208969116211
V
-1,0
BOT
0,3.8805
V
0,5.09071350097656
V
-1,0
BOT
0,3.88716666666667
V
0,5.13362884521484
V
-1,0
BOT
0,3.89383333333333
V
0,5.18131256103516
V
-1,0
BOT
0,3.9005
V
0,5.2332878112793
V
-1,0
BOT
0,3.90716666666667
V
0,5.28907775878906
V
-1,0
BOT
0,3.91383333333333
V
0,5.35058975219727
V
-1,0
BOT
0,3.9205
V
0,5.41782379150391
V
-1,0
BOT
0,3.92716666666667
V
0,5.49173355102539
V
-1,0
BOT
0,3.93383333333333
V
0,5.57231903076172
V
-1,0
BOT
0,3.9405
V
0,5.65958023071289
V
-1,0
BOT
0,3.94716666666667
V
0,5.75399398803711
V
-1,0
BOT
0,3.95383333333333
V
0,5.85556030273438
V
-1,0
BOT
0,3.9605
V
0,5.96332550048828
V
-1,0
BOT
0,3.96716666666667
V
0,6.07728958129883
V
-1,0
BOT
0,3.97383333333333
V
0,6.19649887084961
V
-1,0
BOT
0,3.9805
V
0,6.32190704345703
V
-1,0
BOT
0,3.98716666666667
V
0,6.45256042480469
V
-1,0
BOT
0,3.99383333333333
V
0,6.58750534057617
V
-1,0
BOT
0,4.0005
V
0,6.72769546508789
V
-1,0
BOT
0,4.00716666666667
V
0,6.87265396118164
V
-1,0
BOT
0,4.01383333333333
V
0,7.02333450317383
V
-1,0
BOT
0,4.0205
V
0,7.18021392822266
V
-1,0
BOT
0,4.02716666666667
V
0,7.34186172485352
V
-1,0
BOT
0,4.03383333333333
V
0,7.50732421875
V
-1,0
BOT
0,4.0405
V
0,7.6756477355957
V
-1,0
BOT
0,4.04716666666667
V
0,7.84397125244141
V
-1,0
BOT
0,4.05383333333333
V
0,8.00991058349609
V
-1,0
BOT
0,4.0605
V
0,8.17012786865234
V
-1,0
BOT
0,4.06716666666667
V
0,8.32128524780273
V
-1,0
BOT
0,4.07383333333333
V
0,8.45909118652344
V
-1,0
BOT
0,4.0805
V
0,8.58068466186523
V
-1,0
BOT
0,4.08716666666667
V
0,8.68463516235352
V
-1,0
BOT
0,4.09383333333333
V
0,8.76808166503906
V
-1,0
BOT
0,4.1005
V
0,8.82959365844727
V
-1,0
BOT
0,4.10716666666667
V
0,8.86821746826172
V
-1,0
BOT
0,4.11383333333333
V
0,8.88538360595703
V
-1,0
BOT
0,4.1205
V
0,8.8801383972168
V
-1,0
BOT
0,4.12716666666667
V
0,8.85200500488281
V
-1,0
BOT
0,4.13383333333333
V
0,8.80193710327148
V
-1,0
BOT
0,4.1405
V
0,8.73041152954102
V
-1,0
BOT
0,4.14716666666667
V
0,8.63933563232422
V
-1,0
BOT
0,4.15383333333333
V
0,8.52823257446289
V
-1,0
BOT
0,4.1605
V
0,8.39948654174805
V
-1,0
BOT
0,4.16716666666667
V
0,8.2550048828125
V
-1,0
BOT
0,4.17383333333333
V
0,8.09526443481445
V
-1,0
BOT
0,4.1805
V
0,7.92169570922852
V
-1,0
BOT
0,4.18716666666667
V
0,7.7357292175293
V
-1,0
BOT
0,4.19383333333333
V
0,7.53927230834961
V
-1,0
BOT
0,4.2005
V
0,7.33518600463867
V
-1,0
BOT
0,4.20716666666667
V
0,7.12776184082031
V
-1,0
BOT
0,4.21383333333333
V
0,6.92033767700195
V
-1,0
BOT
0,4.2205
V
0,6.71720504760742
V
-1,0
BOT
0,4.22716666666667
V
0,6.52217864990234
V
-1,0
BOT
0,4.23383333333333
V
0,6.33716583251953
V
-1,0
BOT
0,4.2405
V
0,6.16216659545898
V
-1,0
BOT
0,4.24716666666667
V
0,5.9962272644043
V
-1,0
BOT
0,4.25383333333333
V
0,5.83839416503906
V
-1,0
BOT
0,4.2605
V
0,5.68723678588867
V
-1,0
BOT
0,4.26716666666667
V
0,5.54180145263672
V
-1,0
BOT
0,4.27383333333333
V
0,5.4011344909668
V
-1,0
BOT
0,4.2805
V
0,5.2647590637207
V
-1,0
BOT
0,4.28716666666667
V
0,5.13315200805664
V
-1,0
BOT
0,4.29383333333333
V
0,5.01108169555664
V
-1,0
BOT
0,4.3005
V
0,4.90570068359375
V
-1,0
BOT
0,4.30716666666667
V
0,4.82988357543945
V
-1,0
BOT
0,4.31383333333333
V
0,4.79841232299805
V
-1,0
BOT
0,4.3205
V
0,4.83036041259766
V
-1,0
BOT
0,4.32716666666667
V
0,4.94718551635742
V
-1,0
BOT
0,4.33383333333333
V
0,5.16843795776367
V
-1,0
BOT
0,4.3405
V
0,5.51080703735352
V
-1,0
BOT
0,4.34716666666667
V
0,5.98573684692383
V
-1,0
BOT
0,4.35383333333333
V
0,6.59608840942383
V
-1,0
BOT
0,4.3605
V
0,7.33375549316406
V
-1,0
BOT
0,4.36716666666667
V
0,8.17728042602539
V
-1,0
BOT
0,4.37383333333333
V
0,9.09090042114258
V
-1,0
BOT
0,4.3805
V
0,10.0288391113281
V
-1,0
BOT
0,4.38716666666667
V
0,10.9386444091797
V
-1,0
BOT
0,4.39383333333333
V
0,11.7654800415039
V
-1,0
BOT
0,4.4005
V
0,12.4573707580566
V
-1,0
BOT
0,4.40716666666667
V
0,12.9737854003906
V
-1,0
BOT
0,4.41383333333333
V
0,13.2870674133301
V
-1,0
BOT
0,4.4205
V
0,13.3843421936035
V
-1,0
BOT
0,4.42716666666667
V
0,13.2684707641602
V
-1,0
BOT
0,4.43383333333333
V
0,12.9556655883789
V
-1,0
BOT
0,4.4405
V
0,12.4750137329102
V
-1,0
BOT
0,4.44716666666667
V
0,11.8637084960937
V
-1,0
BOT
0,4.45383333333333
V
0,11.1618041992187
V
-1,0
BOT
0,4.4605
V
0,10.4084014892578
V
-1,0
BOT
0,4.46716666666667
V
0,9.63783264160156
V
-1,0
BOT
0,4.47383333333333
V
0,8.88156890869141
V
-1,0
BOT
0,4.4805
V
0,8.1634521484375
V
-1,0
BOT
0,4.48716666666667
V
0,7.50064849853516
V
-1,0
BOT
0,4.49383333333333
V
0,6.90174102783203
V
-1,0
BOT
0,4.5005
V
0,6.37054443359375
V
-1,0
BOT
0,4.50716666666667
V
0,5.90848922729492
V
-1,0
BOT
0,4.51383333333333
V
0,5.51223754882813
V
-1,0
BOT
0,4.5205
V
0,5.17559051513672
V
-1,0
BOT
0,4.52716666666667
V
0,4.89330291748047
V
-1,0
BOT
0,4.53383333333333
V
0,4.65774536132813
V
-1,0
BOT
0,4.5405
V
0,4.46367263793945
V
-1,0
BOT
0,4.54716666666667
V
0,4.30440902709961
V
-1,0
BOT
0,4.55383333333333
V
0,4.17375564575195
V
-1,0
BOT
0,4.5605
V
0,4.06742095947266
V
-1,0
BOT
0,4.56716666666667
V
0,3.98015975952148
V
-1,0
BOT
0,4.57383333333333
V
0,3.90863418579102
V
-1,0
BOT
0,4.5805
V
0,3.84902954101562
V
-1,0
BOT
0,4.58716666666667
V
0,3.7989616394043
V
-1,0
BOT
0,4.59383333333333
V
0,3.75652313232422
V
-1,0
BOT
0,4.6005
V
0,3.72028350830078
V
-1,0
BOT
0,4.60716666666667
V
0,3.68881225585937
V
-1,0
BOT
0,4.61383333333333
V
0,3.662109375
V
-1,0
BOT
0,4.6205
V
0,3.63922119140625
V
-1,0
BOT
0,4.62716666666667
V
0,3.61871719360352
V
-1,0
BOT
0,4.63383333333333
V
0,3.60107421875
V
-1,0
BOT
0,4.6405
V
0,3.5853385925293
V
-1,0
BOT
0,4.64716666666667
V
0,3.57246398925781
V
-1,0
BOT
0,4.65383333333333
V
0,3.56101989746094
V
-1,0
BOT
0,4.6605
V
0,3.55005264282227
V
-1,0
BOT
0,4.66716666666667
V
0,3.5400390625
V
-1,0
BOT
0,4.67383333333333
V
0,3.53145599365234
V
-1,0
BOT
0,4.6805
V
0,3.52144241333008
V
-1,0
BOT
0,4.68716666666667
V
0,3.51047515869141
V
-1,0
BOT
0,4.69383333333333
V
0,3.49903106689453
V
-1,0
BOT
0,4.7005
V
0,3.48854064941406
V
-1,0
BOT
0,4.70716666666667
V
0,3.47900390625
V
-1,0
BOT
0,4.71383333333333
V
0,3.46994400024414
V
-1,0
BOT
0,4.7205
V
0,3.46136093139648
V
-1,0
BOT
0,4.72716666666667
V
0,3.45373153686523
V
-1,0
BOT
0,4.73383333333333
V
0,3.44610214233398
V
-1,0
BOT
0,4.7405
V
0,3.43894958496094
V
-1,0
BOT
0,4.74716666666667
V
0,3.43227386474609
V
-1,0
BOT
0,4.75383333333333
V
0,3.42702865600586
V
-1,0
BOT
0,4.7605
V
0,3.42178344726562
V
-1,0
BOT
0,4.76716666666667
V
0,3.4174919128418
V
-1,0
BOT
0,4.77383333333333
V
0,3.41272354125977
V
-1,0
BOT
0,4.7805
V
0,3.40604782104492
V
-1,0
BOT
0,4.78716666666667
V
0,3.39698791503906
V
-1,0
BOT
0,4.79383333333333
V
0,3.38363647460937
V
-1,0
BOT
0,4.8005
V
0,3.36694717407227
V
-1,0
BOT
0,4.80716666666667
V
0,3.34548950195312
V
-1,0
BOT
0,4.81383333333333
V
0,3.31878662109375
V
-1,0
BOT
0,4.8205
V
0,3.28683853149414
V
-1,0
BOT
0,4.82716666666667
V
0,3.25202941894531
V
-1,0
BOT
0,4.83383333333333
V
0,3.21531295776367
V
-1,0
BOT
0,4.8405
V
0,3.17764282226562
V
-1,0
BOT
0,4.84716666666667
V
0,3.14092636108398
V
-1,0
BOT
0,4.85383333333333
V
0,3.10611724853516
V
-1,0
BOT
0,4.8605
V
0,3.07416915893555
V
-1,0
BOT
0,4.86716666666667
V
0,3.04603576660156
V
-1,0
BOT
0,4.87383333333333
V
0,3.01980972290039
V
-1,0
BOT
0,4.8805
V
0,2.99644470214844
V
-1,0
BOT
0,4.88716666666667
V
0,2.9759407043457
V
-1,0
BOT
0,4.89383333333333
V
0,2.95877456665039
V
-1,0
BOT
0,4.9005
V
0,2.9454231262207
V
-1,0
BOT
0,4.90716666666667
V
0,2.93636322021484
V
-1,0
BOT
0,4.91383333333333
V
0,2.93064117431641
V
-1,0
BOT
0,4.9205
V
0,2.92778015136719
V
-1,0
BOT
0,4.92716666666667
V
0,2.92682647705078
V
-1,0
BOT
0,4.93383333333333
V
0,2.92682647705078
V
-1,0
BOT
0,4.9405
V
0,2.92682647705078
V
-1,0
BOT
0,4.94716666666667
V
0,2.92682647705078
V
-1,0
BOT
0,4.95383333333333
V
0,2.92682647705078
V
-1,0
BOT
0,4.9605
V
0,2.92730331420898
V
-1,0
BOT
0,4.96716666666667
V
0,2.9292106628418
V
-1,0
BOT
0,4.97383333333333
V
0,2.93254852294922
V
-1,0
BOT
0,4.9805
V
0,2.93636322021484
V
-1,0
BOT
0,4.98716666666667
V
0,2.94017791748047
V
-1,0
BOT
0,4.99383333333333
V
0,2.94637680053711
V
-1,0
BOT
0,5.0005
V
0,2.95686721801758
V
-1,0
BOT
0,5.00716666666667
V
0,2.97117233276367
V
-1,0
BOT
0,5.01383333333333
V
0,2.98833847045898
V
-1,0
BOT
0,5.0205
V
0,3.01027297973633
V
-1,0
BOT
0,5.02716666666667
V
0,3.03888320922852
V
-1,0
BOT
0,5.03383333333333
V
0,3.07273864746094
V
-1,0
BOT
0,5.0405
V
0,3.11136245727539
V
-1,0
BOT
0,5.04716666666667
V
0,3.15618515014648
V
-1,0
BOT
0,5.05383333333333
V
0,3.20672988891602
V
-1,0
BOT
0,5.0605
V
0,3.26251983642578
V
-1,0
BOT
0,5.06716666666667
V
0,3.32307815551758
V
-1,0
BOT
0,5.07383333333333
V
0,3.3869743347168
V
-1,0
BOT
0,5.0805
V
0,3.45325469970703
V
-1,0
BOT
0,5.08716666666667
V
0,3.52144241333008
V
-1,0
BOT
0,5.09383333333333
V
0,3.59201431274414
V
-1,0
BOT
0,5.1005
V
0,3.6625862121582
V
-1,0
BOT
0,5.10716666666667
V
0,3.73077392578125
V
-1,0
BOT
0,5.11383333333333
V
0,3.79562377929687
V
-1,0
BOT
0,5.1205
V
0,3.85570526123047
V
-1,0
BOT
0,5.12716666666667
V
0,3.90815734863281
V
-1,0
BOT
0,5.13383333333333
V
0,3.95059585571289
V
-1,0
BOT
0,5.1405
V
0,3.98349761962891
V
-1,0
BOT
0,5.14716666666667
V
0,4.00781631469727
V
-1,0
BOT
0,5.15383333333333
V
0,4.02355194091797
V
-1,0
BOT
0,5.1605
V
0,4.02927398681641
V
-1,0
BOT
0,5.16716666666667
V
0,4.02545928955078
V
-1,0
BOT
0,5.17383333333333
V
0,4.01496887207031
V
-1,0
BOT
0,5.1805
V
0,3.99875640869141
V
-1,0
BOT
0,5.18716666666667
V
0,3.97682189941406
V
-1,0
BOT
0,5.19383333333333
V
0,3.94821166992187
V
-1,0
BOT
0,5.2005
V
0,3.91435623168945
V
-1,0
BOT
0,5.20716666666667
V
0,3.8762092590332
V
-1,0
BOT
0,5.21383333333333
V
0,3.83520126342773
V
-1,0
BOT
0,5.2205
V
0,3.79037857055664
V
-1,0
BOT
0,5.22716666666667
V
0,3.74269485473633
V
-1,0
BOT
0,5.23383333333333
V
0,3.69453430175781
V
-1,0
BOT
0,5.2405
V
0,3.64542007446289
V
-1,0
BOT
0,5.24716666666667
V
0,3.59678268432617
V
-1,0
BOT
0,5.25383333333333
V
0,3.54766845703125
V
-1,0
BOT
0,5.2605
V
0,3.49855422973633
V
-1,0
BOT
0,5.26716666666667
V
0,3.44991683959961
V
-1,0
BOT
0,5.27383333333333
V
0,3.40127944946289
V
-1,0
BOT
0,5.2805
V
0,3.35216522216797
V
-1,0
BOT
0,5.28716666666667
V
0,3.30305099487305
V
-1,0
BOT
0,5.29383333333333
V
0,3.25441360473633
V
-1,0
BOT
0,5.3005
V
0,3.20672988891602
V
-1,0
BOT
0,5.30716666666667
V
0,3.1590461730957
V
-1,0
BOT
0,5.31383333333333
V
0,3.11279296875
V
-1,0
BOT
0,5.3205
V
0,3.06844711303711
V
-1,0
BOT
0,5.32716666666667
V
0,3.02791595458984
V
-1,0
BOT
0,5.33383333333333
V
0,2.98976898193359
V
-1,0
BOT
0,5.3405
V
0,2.95448303222656
V
-1,0
BOT
0,5.34716666666667
V
0,2.92158126831055
V
-1,0
BOT
0,5.35383333333333
V
0,2.89154052734375
V
-1,0
BOT
0,5.3605
V
0,2.86340713500977
V
-1,0
BOT
0,5.36716666666667
V
0,2.838134765625
V
-1,0
BOT
0,5.37383333333333
V
0,2.81572341918945
V
-1,0
BOT
0,5.3805
V
0,2.79474258422852
V
-1,0
BOT
0,5.38716666666667
V
0,2.77614593505859
V
-1,0
BOT
0,5.39383333333333
V
0,2.75993347167969
V
-1,0
BOT
0,5.4005
V
0,2.74658203125
V
-1,0
BOT
0,5.40716666666667
V
0,2.73275375366211
V
-1,0
BOT
0,5.41383333333333
V
0,2.71797180175781
V
-1,0
BOT
0,5.4205
V
0,2.70414352416992
V
-1,0
BOT
0,5.42716666666667
V
0,2.69079208374023
V
-1,0
BOT
0,5.43383333333333
V
0,2.67744064331055
V
-1,0
BOT
0,5.4405
V
0,2.66313552856445
V
-1,0
BOT
0,5.44716666666667
V
0,2.64930725097656
V
-1,0
BOT
0,5.45383333333333
V
0,2.63690948486328
V
-1,0
BOT
0,5.4605
V
0,2.62451171875
V
-1,0
BOT
0,5.46716666666667
V
0,2.61163711547852
V
-1,0
BOT
0,5.47383333333333
V
0,2.59876251220703
V
-1,0
BOT
0,5.4805
V
0,2.58731842041016
V
-1,0
BOT
0,5.48716666666667
V
0,2.57635116577148
V
-1,0
BOT
0,5.49383333333333
V
0,2.56586074829102
V
-1,0
BOT
0,5.5005
V
0,2.55775451660156
V
-1,0
BOT
0,5.50716666666667
V
0,2.55203247070312
V
-1,0
BOT
0,5.51383333333333
V
0,2.5486946105957
V
-1,0
BOT
0,5.5205
V
0,2.5477409362793
V
-1,0
BOT
0,5.52716666666667
V
0,2.54964828491211
V
-1,0
BOT
0,5.53383333333333
V
0,2.55346298217773
V
-1,0
BOT
0,5.5405
V
0,2.55680084228516
V
-1,0
BOT
0,5.54716666666667
V
0,2.55966186523437
V
-1,0
BOT
0,5.55383333333333
V
0,2.56252288818359
V
-1,0
BOT
0,5.5605
V
0,2.56538391113281
V
-1,0
BOT
0,5.56716666666667
V
0,2.56919860839844
V
-1,0
BOT
0,5.57383333333333
V
0,2.57444381713867
V
-1,0
BOT
0,5.5805
V
0,2.58111953735352
V
-1,0
BOT
0,5.58716666666667
V
0,2.59017944335937
V
-1,0
BOT
0,5.59383333333333
V
0,2.60066986083984
V
-1,0
BOT
0,5.6005
V
0,2.61306762695312
V
-1,0
BOT
0,5.60716666666667
V
0,2.62641906738281
V
-1,0
BOT
0,5.61383333333333
V
0,2.6402473449707
V
-1,0
BOT
0,5.6205
V
0,2.6555061340332
V
-1,0
BOT
0,5.62716666666667
V
0,2.67219543457031
V
-1,0
BOT
0,5.63383333333333
V
0,2.69079208374023
V
-1,0
BOT
0,5.6405
V
0,2.70986557006836
V
-1,0
BOT
0,5.64716666666667
V
0,2.72989273071289
V
-1,0
BOT
0,5.65383333333333
V
0,2.74991989135742
V
-1,0
BOT
0,5.6605
V
0,2.76899337768555
V
-1,0
BOT
0,5.66716666666667
V
0,2.78759002685547
V
-1,0
BOT
0,5.67383333333333
V
0,2.80570983886719
V
-1,0
BOT
0,5.6805
V
0,2.8228759765625
V
-1,0
BOT
0,5.68716666666667
V
0,2.838134765625
V
-1,0
BOT
0,5.69383333333333
V
0,2.85434722900391
V
-1,0
BOT
0,5.7005
V
0,2.87151336669922
V
-1,0
BOT
0,5.70716666666667
V
0,2.88867950439453
V
-1,0
BOT
0,5.71383333333333
V
0,2.90489196777344
V
-1,0
BOT
0,5.7205
V
0,2.91967391967773
V
-1,0
BOT
0,5.72716666666667
V
0,2.93493270874023
V
-1,0
BOT
0,5.73383333333333
V
0,2.95066833496094
V
-1,0
BOT
0,5.7405
V
0,2.96688079833984
V
-1,0
BOT
0,5.74716666666667
V
0,2.98500061035156
V
-1,0
BOT
0,5.75383333333333
V
0,3.00455093383789
V
-1,0
BOT
0,5.7605
V
0,3.02648544311523
V
-1,0
BOT
0,5.76716666666667
V
0,3.04937362670898
V
-1,0
BOT
0,5.77383333333333
V
0,3.07369232177734
V
-1,0
BOT
0,5.7805
V
0,3.10039520263672
V
-1,0
BOT
0,5.78716666666667
V
0,3.1280517578125
V
-1,0
BOT
0,5.79383333333333
V
0,3.1585693359375
V
-1,0
BOT
0,5.8005
V
0,3.19147109985352
V
-1,0
BOT
0,5.80716666666667
V
0,3.22866439819336
V
-1,0
BOT
0,5.81383333333333
V
0,3.27110290527344
V
-1,0
BOT
0,5.8205
V
0,3.32021713256836
V
-1,0
BOT
0,5.82716666666667
V
0,3.37791442871094
V
-1,0
BOT
0,5.83383333333333
V
0,3.4489631652832
V
-1,0
BOT
0,5.8405
V
0,3.5395622253418
V
-1,0
BOT
0,5.84716666666667
V
0,3.65591049194336
V
-1,0
BOT
0,5.85383333333333
V
0,3.80849838256836
V
-1,0
BOT
0,5.8605
V
0,4.01163101196289
V
-1,0
BOT
0,5.86716666666667
V
0,4.28390502929688
V
-1,0
BOT
0,5.87383333333333
V
0,4.64773178100586
V
-1,0
BOT
0,5.8805
V
0,5.1274299621582
V
-1,0
BOT
0,5.88716666666667
V
0,5.75065612792969
V
-1,0
BOT
0,5.89383333333333
V
0,6.54840469360352
V
-1,0
BOT
0,5.9005
V
0,7.55167007446289
V
-1,0
BOT
0,5.90716666666667
V
0,8.79096984863281
V
-1,0
BOT
0,5.91383333333333
V
0,10.2896690368652
V
-1,0
BOT
0,5.9205
V
0,12.0620727539062
V
-1,0
BOT
0,5.92716666666667
V
0,14.1086578369141
V
-1,0
BOT
0,5.93383333333333
V
0,16.4151191711426
V
-1,0
BOT
0,5.9405
V
0,18.9476013183594
V
-1,0
BOT
0,5.94716666666667
V
0,21.6517448425293
V
-1,0
BOT
0,5.95383333333333
V
0,24.451732635498
V
-1,0
BOT
0,5.9605
V
0,27.259349822998
V
-1,0
BOT
0,5.96716666666667
V
0,29.9739837646484
V
-1,0
BOT
0,5.97383333333333
V
0,32.4926376342773
V
-1,0
BOT
0,5.9805
V
0,34.7142219543457
V
-1,0
BOT
0,5.98716666666667
V
0,36.5486145019531
V
-1,0
BOT
0,5.99383333333333
V
0,37.9247665405273
V
-1,0
BOT
0,6.0005
V
0,38.7969017028809
V
-1,0
BOT
0,6.00716666666667
V
0,39.1430854797363
V
-1,0
BOT
0,6.01383333333333
V
0,38.9666557312012
V
-1,0
BOT
0,6.0205
V
0,38.3000373840332
V
-1,0
BOT
0,6.02716666666667
V
0,37.1966361999512
V
-1,0
BOT
0,6.03383333333333
V
0,35.7270240783691
V
-1,0
BOT
0,6.0405
V
0,33.9713096618652
V
-1,0
BOT
0,6.04716666666667
V
0,32.012939453125
V
-1,0
BOT
0,6.05383333333333
V
0,29.935359954834
V
-1,0
BOT
0,6.0605
V
0,27.8158187866211
V
-1,0
BOT
0,6.06716666666667
V
0,25.7201194763184
V
-1,0
BOT
0,6.07383333333333
V
0,23.7016677856445
V
-1,0
BOT
0,6.0805
V
0,21.8024253845215
V
-1,0
BOT
0,6.08716666666667
V
0,20.0519561767578
V
-1,0
BOT
0,6.09383333333333
V
0,18.4659957885742
V
-1,0
BOT
0,6.1005
V
0,17.0507431030273
V
-1,0
BOT
0,6.10716666666667
V
0,15.8019065856934
V
-1,0
BOT
0,6.11383333333333
V
0,14.7109031677246
V
-1,0
BOT
0,6.1205
V
0,13.7653350830078
V
-1,0
BOT
0,6.12716666666667
V
0,12.9485130310059
V
-1,0
BOT
0,6.13383333333333
V
0,12.2427940368652
V
-1,0
BOT
0,6.1405
V
0,11.6310119628906
V
-1,0
BOT
0,6.14716666666667
V
0,11.0960006713867
V
-1,0
BOT
0,6.15383333333333
V
0,10.6215476989746
V
-1,0
BOT
0,6.1605
V
0,10.1947784423828
V
-1,0
BOT
0,6.16716666666667
V
0,9.80329513549805
V
-1,0
BOT
0,6.17383333333333
V
0,9.44042205810547
V
-1,0
BOT
0,6.1805
V
0,9.09948348999023
V
-1,0
BOT
0,6.18716666666667
V
0,8.77666473388672
V
-1,0
BOT
0,6.19383333333333
V
0,8.4681510925293
V
-1,0
BOT
0,6.2005
V
0,8.17203521728516
V
-1,0
BOT
0,6.20716666666667
V
0,7.88736343383789
V
-1,0
BOT
0,6.21383333333333
V
0,7.6136589050293
V
-1,0
BOT
0,6.2205
V
0,7.35187530517578
V
-1,0
BOT
0,6.22716666666667
V
0,7.10248947143555
V
-1,0
BOT
0,6.23383333333333
V
0,6.86788558959961
V
-1,0
BOT
0,6.2405
V
0,6.64806365966797
V
-1,0
BOT
0,6.24716666666667
V
0,6.44350051879883
V
-1,0
BOT
0,6.25383333333333
V
0,6.25371932983398
V
-1,0
BOT
0,6.2605
V
0,6.07919692993164
V
-1,0
BOT
0,6.26716666666667
V
0,5.9199333190918
V
-1,0
BOT
0,6.27383333333333
V
0,5.77783584594727
V
-1,0
BOT
0,6.2805
V
0,5.65290451049805
V
-1,0
BOT
0,6.28716666666667
V
0,5.54561614990234
V
-1,0
BOT
0,6.29383333333333
V
0,5.45740127563477
V
-1,0
BOT
0,6.3005
V
0,5.38921356201172
V
-1,0
BOT
0,6.30716666666667
V
0,5.33962249755859
V
-1,0
BOT
0,6.31383333333333
V
0,5.30576705932617
V
-1,0
BOT
0,6.3205
V
0,5.28717041015625
V
-1,0
BOT
0,6.32716666666667
V
0,5.28240203857422
V
-1,0
BOT
0,6.33383333333333
V
0,5.28907775878906
V
-1,0
BOT
0,6.3405
V
0,5.30481338500977
V
-1,0
BOT
0,6.34716666666667
V
0,5.32627105712891
V
-1,0
BOT
0,6.35383333333333
V
0,5.35202026367188
V
-1,0
BOT
0,6.3605
V
0,5.37967681884766
V
-1,0
BOT
0,6.36716666666667
V
0,5.40590286254883
V
-1,0
BOT
0,6.37383333333333
V
0,5.42736053466797
V
-1,0
BOT
0,6.3805
V
0,5.44309616088867
V
-1,0
BOT
0,6.38716666666667
V
0,5.45024871826172
V
-1,0
BOT
0,6.39383333333333
V
0,5.44834136962891
V
-1,0
BOT
0,6.4005
V
0,5.43546676635742
V
-1,0
BOT
0,6.40716666666667
V
0,5.41162490844727
V
-1,0
BOT
0,6.41383333333333
V
0,5.37681579589844
V
-1,0
BOT
0,6.4205
V
0,5.33151626586914
V
-1,0
BOT
0,6.42716666666667
V
0,5.27667999267578
V
-1,0
BOT
0,6.43383333333333
V
0,5.21373748779297
V
-1,0
BOT
0,6.4405
V
0,5.14316558837891
V
-1,0
BOT
0,6.44716666666667
V
0,5.0663948059082
V
-1,0
BOT
0,6.45383333333333
V
0,4.98342514038086
V
-1,0
BOT
0,6.4605
V
0,4.89425659179688
V
-1,0
BOT
0,6.46716666666667
V
0,4.79936599731445
V
-1,0
BOT
0,6.47383333333333
V
0,4.69970703125
V
-1,0
BOT
0,6.4805
V
0,4.59432601928711
V
-1,0
BOT
0,6.48716666666667
V
0,4.4856071472168
V
-1,0
BOT
0,6.49383333333333
V
0,4.37593460083008
V
-1,0
BOT
0,6.5005
V
0,4.26673889160156
V
-1,0
BOT
0,6.50716666666667
V
0,4.15849685668945
V
-1,0
BOT
0,6.51383333333333
V
0,4.05311584472656
V
-1,0
BOT
0,6.5205
V
0,3.9515495300293
V
-1,0
BOT
0,6.52716666666667
V
0,3.85570526123047
V
-1,0
BOT
0,6.53383333333333
V
0,3.76462936401367
V
-1,0
BOT
0,6.5405
V
0,3.67879867553711
V
-1,0
BOT
0,6.54716666666667
V
0,3.59964370727539
V
-1,0
BOT
0,6.55383333333333
V
0,3.52668762207031
V
-1,0
BOT
0,6.5605
V
0,3.45945358276367
V
-1,0
BOT
0,6.56716666666667
V
0,3.39841842651367
V
-1,0
BOT
0,6.57383333333333
V
0,3.34310531616211
V
-1,0
BOT
0,6.5805
V
0,3.29399108886719
V
-1,0
BOT
0,6.58716666666667
V
0,3.2501220703125
V
-1,0
BOT
0,6.59383333333333
V
0,3.21006774902344
V
-1,0
BOT
0,6.6005
V
0,3.1743049621582
V
-1,0
BOT
0,6.60716666666667
V
0,3.14092636108398
V
-1,0
BOT
0,6.61383333333333
V
0,3.10993194580078
V
-1,0
BOT
0,6.6205
V
0,3.07989120483398
V
-1,0
BOT
0,6.62716666666667
V
0,3.04985046386719
V
-1,0
BOT
0,6.63383333333333
V
0,3.02028656005859
V
-1,0
BOT
0,6.6405
V
0,2.9911994934082
V
-1,0
BOT
0,6.64716666666667
V
0,2.96354293823242
V
-1,0
BOT
0,6.65383333333333
V
0,2.93636322021484
V
-1,0
BOT
0,6.6605
V
0,2.90966033935547
V
-1,0
BOT
0,6.66716666666667
V
0,2.8839111328125
V
-1,0
BOT
0,6.67383333333333
V
0,2.85911560058594
V
-1,0
BOT
0,6.6805
V
0,2.83622741699219
V
-1,0
BOT
0,6.68716666666667
V
0,2.81476974487305
V
-1,0
BOT
0,6.69383333333333
V
0,2.79617309570312
V
-1,0
BOT
0,6.7005
V
0,2.78091430664062
V
-1,0
BOT
0,6.70716666666667
V
0,2.77042388916016
V
-1,0
BOT
0,6.71383333333333
V
0,2.76565551757812
V
-1,0
BOT
0,6.7205
V
0,2.76756286621094
V
-1,0
BOT
0,6.72716666666667
V
0,2.77614593505859
V
-1,0
BOT
0,6.73383333333333
V
0,2.7918815612793
V
-1,0
BOT
0,6.7405
V
0,2.81572341918945
V
-1,0
BOT
0,6.74716666666667
V
0,2.84957885742187
V
-1,0
BOT
0,6.75383333333333
V
0,2.89440155029297
V
-1,0
BOT
0,6.7605
V
0,2.95066833496094
V
-1,0
BOT
0,6.76716666666667
V
0,3.02028656005859
V
-1,0
BOT
0,6.77383333333333
V
0,3.10325622558594
V
-1,0
BOT
0,6.7805
V
0,3.19814682006836
V
-1,0
BOT
0,6.78716666666667
V
0,3.30543518066406
V
-1,0
BOT
0,6.79383333333333
V
0,3.42273712158203
V
-1,0
BOT
0,6.8005
V
0,3.54814529418945
V
-1,0
BOT
0,6.80716666666667
V
0,3.6773681640625
V
-1,0
BOT
0,6.81383333333333
V
0,3.80516052246094
V
-1,0
BOT
0,6.8205
V
0,3.92913818359375
V
-1,0
BOT
0,6.82716666666667
V
0,4.0435791015625
V
-1,0
BOT
0,6.83383333333333
V
0,4.14419174194336
V
-1,0
BOT
0,6.8405
V
0,4.22525405883789
V
-1,0
BOT
0,6.84716666666667
V
0,4.28485870361328
V
-1,0
BOT
0,6.85383333333333
V
0,4.32252883911133
V
-1,0
BOT
0,6.8605
V
0,4.33588027954102
V
-1,0
BOT
0,6.86716666666667
V
0,4.32491302490234
V
-1,0
BOT
0,6.87383333333333
V
0,4.29105758666992
V
-1,0
BOT
0,6.8805
V
0,4.23574447631836
V
-1,0
BOT
0,6.88716666666667
V
0,4.16135787963867
V
-1,0
BOT
0,6.89383333333333
V
0,4.06932830810547
V
-1,0
BOT
0,6.9005
V
0,3.96347045898437
V
-1,0
BOT
0,6.90716666666667
V
0,3.84807586669922
V
-1,0
BOT
0,6.91383333333333
V
0,3.72791290283203
V
-1,0
BOT
0,6.9205
V
0,3.60727310180664
V
-1,0
BOT
0,6.92716666666667
V
0,3.48901748657227
V
-1,0
BOT
0,6.93383333333333
V
0,3.37600708007812
V
-1,0
BOT
0,6.9405
V
0,3.27014923095703
V
-1,0
BOT
0,6.94716666666667
V
0,3.17096710205078
V
-1,0
BOT
0,6.95383333333333
V
0,3.08036804199219
V
-1,0
BOT
0,6.9605
V
0,2.99692153930664
V
-1,0
BOT
0,6.96716666666667
V
0,2.92158126831055
V
-1,0
BOT
0,6.97383333333333
V
0,2.85482406616211
V
-1,0
BOT
0,6.9805
V
0,2.79569625854492
V
-1,0
BOT
0,6.98716666666667
V
0,2.74372100830078
V
-1,0
BOT
0,6.99383333333333
V
0,2.69794464111328
V
-1,0
BOT
0,7.0005
V
0,2.65645980834961
V
-1,0
BOT
0,7.00716666666667
V
0,2.61783599853516
V
-1,0
BOT
0,7.01383333333333
V
0,2.58255004882812
V
-1,0
BOT
0,7.0205
V
0,2.54917144775391
V
-1,0
BOT
0,7.02716666666667
V
0,2.5177001953125
V
-1,0
BOT
0,7.03383333333333
V
0,2.4867057800293
V
-1,0
BOT
0,7.0405
V
0,2.4561882019043
V
-1,0
BOT
0,7.04716666666667
V
0,2.4261474609375
V
-1,0
BOT
0,7.05383333333333
V
0,2.39706039428711
V
-1,0
BOT
0,7.0605
V
0,2.36892700195312
V
-1,0
BOT
0,7.06716666666667
V
0,2.34270095825195
V
-1,0
BOT
0,7.07383333333333
V
0,2.3188591003418
V
-1,0
BOT
0,7.0805
V
0,2.29787826538086
V
-1,0
BOT
0,7.08716666666667
V
0,2.27975845336914
V
-1,0
BOT
0,7.09383333333333
V
0,2.26354598999023
V
-1,0
BOT
0,7.1005
V
0,2.24828720092773
V
-1,0
BOT
0,7.10716666666667
V
0,2.23445892333984
V
-1,0
BOT
0,7.11383333333333
V
0,2.22158432006836
V
-1,0
BOT
0,7.1205
V
0,2.21014022827148
V
-1,0
BOT
0,7.12716666666667
V
0,2.20012664794922
V
-1,0
BOT
0,7.13383333333333
V
0,2.19249725341797
V
-1,0
BOT
0,7.1405
V
0,2.18582153320312
V
-1,0
BOT
0,7.14716666666667
V
0,2.18009948730469
V
-1,0
BOT
0,7.15383333333333
V
0,2.17437744140625
V
-1,0
BOT
0,7.1605
V
0,2.16960906982422
V
-1,0
BOT
0,7.16716666666667
V
0,2.16579437255859
V
-1,0
BOT
0,7.17383333333333
V
0,2.16293334960937
V
-1,0
BOT
0,7.1805
V
0,2.16102600097656
V
-1,0
BOT
0,7.18716666666667
V
0,2.16102600097656
V
-1,0
BOT
0,7.19383333333333
V
0,2.16293334960937
V
-1,0
BOT
0,7.2005
V
0,2.16484069824219
V
-1,0
BOT
0,7.20716666666667
V
0,2.166748046875
V
-1,0
BOT
0,7.21383333333333
V
0,2.16817855834961
V
-1,0
BOT
0,7.2205
V
0,2.17056274414062
V
-1,0
BOT
0,7.22716666666667
V
0,2.17390060424805
V
-1,0
BOT
0,7.23383333333333
V
0,2.17676162719727
V
-1,0
BOT
0,7.2405
V
0,2.18105316162109
V
-1,0
BOT
0,7.24716666666667
V
0,2.18582153320312
V
-1,0
BOT
0,7.25383333333333
V
0,2.19154357910156
V
-1,0
BOT
0,7.2605
V
0,2.19821929931641
V
-1,0
BOT
0,7.26716666666667
V
0,2.20489501953125
V
-1,0
BOT
0,7.27383333333333
V
0,2.21347808837891
V
-1,0
BOT
0,7.2805
V
0,2.22253799438477
V
-1,0
BOT
0,7.28716666666667
V
0,2.23112106323242
V
-1,0
BOT
0,7.29383333333333
V
0,2.23922729492187
V
-1,0
BOT
0,7.3005
V
0,2.24828720092773
V
-1,0
BOT
0,7.30716666666667
V
0,2.25830078125
V
-1,0
BOT
0,7.31383333333333
V
0,2.27022171020508
V
-1,0
BOT
0,7.3205
V
0,2.28452682495117
V
-1,0
BOT
0,7.32716666666667
V
0,2.3040771484375
V
-1,0
BOT
0,7.33383333333333
V
0,2.32791900634766
V
-1,0
BOT
0,7.3405
V
0,2.35462188720703
V
-1,0
BOT
0,7.34716666666667
V
0,2.38513946533203
V
-1,0
BOT
0,7.35383333333333
V
0,2.41947174072266
V
-1,0
BOT
0,7.3605
V
0,2.45857238769531
V
-1,0
BOT
0,7.36716666666667
V
0,2.50244140625
V
-1,0
BOT
0,7.37383333333333
V
0,2.55155563354492
V
-1,0
BOT
0,7.3805
V
0,2.60400772094727
V
-1,0
BOT
0,7.38716666666667
V
0,2.65836715698242
V
-1,0
BOT
0,7.39383333333333
V
0,2.71415710449219
V
-1,0
BOT
0,7.4005
V
0,2.76994705200195
V
-1,0
BOT
0,7.40716666666667
V
0,2.82382965087891
V
-1,0
BOT
0,7.41383333333333
V
0,2.87342071533203
V
-1,0
BOT
0,7.4205
V
0,2.91872024536133
V
-1,0
BOT
0,7.42716666666667
V
0,2.95734405517578
V
-1,0
BOT
0,7.43383333333333
V
0,2.98738479614258
V
-1,0
BOT
0,7.4405
V
0,3.0059814453125
V
-1,0
BOT
0,7.44716666666667
V
0,3.01456451416016
V
-1,0
BOT
0,7.45383333333333
V
0,3.01265716552734
V
-1,0
BOT
0,7.4605
V
0,3.00121307373047
V
-1,0
BOT
0,7.46716666666667
V
0,2.97927856445312
V
-1,0
BOT
0,7.47383333333333
V
0,2.94923782348633
V
-1,0
BOT
0,7.4805
V
0,2.91156768798828
V
-1,0
BOT
0,7.48716666666667
V
0,2.86769866943359
V
-1,0
BOT
0,7.49383333333334
V
0,2.81810760498047
V
-1,0
BOT
0,7.5005
V
0,2.76517868041992
V
-1,0
BOT
0,7.50716666666667
V
0,2.71129608154297
V
-1,0
BOT
0,7.51383333333333
V
0,2.65836715698242
V
-1,0
BOT
0,7.5205
V
0,2.60782241821289
V
-1,0
BOT
0,7.52716666666667
V
0,2.56061553955078
V
-1,0
BOT
0,7.53383333333333
V
0,2.51674652099609
V
-1,0
BOT
0,7.5405
V
0,2.47573852539062
V
-1,0
BOT
0,7.54716666666667
V
0,2.43854522705078
V
-1,0
BOT
0,7.55383333333333
V
0,2.40468978881836
V
-1,0
BOT
0,7.5605
V
0,2.37464904785156
V
-1,0
BOT
0,7.56716666666667
V
0,2.34842300415039
V
-1,0
BOT
0,7.57383333333333
V
0,2.32696533203125
V
-1,0
BOT
0,7.5805
V
0,2.31027603149414
V
-1,0
BOT
0,7.58716666666667
V
0,2.29787826538086
V
-1,0
BOT
0,7.59383333333333
V
0,2.2892951965332
V
-1,0
BOT
0,7.6005
V
0,2.28309631347656
V
-1,0
BOT
0,7.60716666666667
V
0,2.28023529052734
V
-1,0
BOT
0,7.61383333333333
V
0,2.27880477905273
V
-1,0
BOT
0,7.6205
V
0,2.27880477905273
V
-1,0
BOT
0,7.62716666666667
V
0,2.28071212768555
V
-1,0
BOT
0,7.63383333333333
V
0,2.28548049926758
V
-1,0
BOT
0,7.6405
V
0,2.29167938232422
V
-1,0
BOT
0,7.64716666666667
V
0,2.29930877685547
V
-1,0
BOT
0,7.65383333333333
V
0,2.30789184570312
V
-1,0
BOT
0,7.6605
V
0,2.31790542602539
V
-1,0
BOT
0,7.66716666666667
V
0,2.32791900634766
V
-1,0
BOT
0,7.67383333333333
V
0,2.33697891235352
V
-1,0
BOT
0,7.6805
V
0,2.34556198120117
V
-1,0
BOT
0,7.68716666666667
V
0,2.35223770141602
V
-1,0
BOT
0,7.69383333333333
V
0,2.35700607299805
V
-1,0
BOT
0,7.7005
V
0,2.35843658447266
V
-1,0
BOT
0,7.70716666666667
V
0,2.35748291015625
V
-1,0
BOT
0,7.71383333333333
V
0,2.35462188720703
V
-1,0
BOT
0,7.7205
V
0,2.349853515625
V
-1,0
BOT
0,7.72716666666667
V
0,2.34413146972656
V
-1,0
BOT
0,7.73383333333333
V
0,2.33840942382812
V
-1,0
BOT
0,7.7405
V
0,2.33364105224609
V
-1,0
BOT
0,7.74716666666667
V
0,2.33030319213867
V
-1,0
BOT
0,7.75383333333333
V
0,2.32887268066406
V
-1,0
BOT
0,7.7605
V
0,2.33030319213867
V
-1,0
BOT
0,7.76716666666667
V
0,2.33602523803711
V
-1,0
BOT
0,7.77383333333333
V
0,2.34699249267578
V
-1,0
BOT
0,7.7805
V
0,2.3646354675293
V
-1,0
BOT
0,7.78716666666667
V
0,2.38847732543945
V
-1,0
BOT
0,7.79383333333333
V
0,2.41756439208984
V
-1,0
BOT
0,7.8005
V
0,2.45189666748047
V
-1,0
BOT
0,7.80716666666667
V
0,2.49052047729492
V
-1,0
BOT
0,7.81383333333333
V
0,2.53391265869141
V
-1,0
BOT
0,7.8205
V
0,2.57968902587891
V
-1,0
BOT
0,7.82716666666667
V
0,2.62689590454102
V
-1,0
BOT
0,7.83383333333333
V
0,2.67505645751953
V
-1,0
BOT
0,7.8405
V
0,2.72417068481445
V
-1,0
BOT
0,7.84716666666667
V
0,2.77376174926758
V
-1,0
BOT
0,7.85383333333333
V
0,2.82144546508789
V
-1,0
BOT
0,7.8605
V
0,2.86531448364258
V
-1,0
BOT
0,7.86716666666667
V
0,2.90441513061523
V
-1,0
BOT
0,7.87383333333333
V
0,2.93874740600586
V
-1,0
BOT
0,7.8805
V
0,2.96735763549805
V
-1,0
BOT
0,7.88716666666667
V
0,2.98929214477539
V
-1,0
BOT
0,7.89383333333333
V
0,3.00359725952148
V
-1,0
BOT
0,7.9005
V
0,3.01218032836914
V
-1,0
BOT
0,7.90716666666667
V
0,3.01456451416016
V
-1,0
BOT
0,7.91383333333333
V
0,3.01074981689453
V
-1,0
BOT
0,7.9205
V
0,3.00073623657227
V
-1,0
BOT
0,7.92716666666667
V
0,2.98547744750977
V
-1,0
BOT
0,7.93383333333333
V
0,2.96640396118164
V
-1,0
BOT
0,7.9405
V
0,2.94399261474609
V
-1,0
BOT
0,7.94716666666667
V
0,2.91919708251953
V
-1,0
BOT
0,7.95383333333333
V
0,2.89154052734375
V
-1,0
BOT
0,7.9605
V
0,2.86245346069336
V
-1,0
BOT
0,7.96716666666667
V
0,2.83288955688477
V
-1,0
BOT
0,7.97383333333333
V
0,2.80284881591797
V
-1,0
BOT
0,7.9805
V
0,2.77233123779297
V
-1,0
BOT
0,7.98716666666667
V
0,2.74133682250977
V
-1,0
BOT
0,7.99383333333333
V
0,2.71129608154297
V
-1,0
BOT
0,8.0005
V
0,2.68173217773437
V
-1,0
BOT
0,8.00716666666667
V
0,2.65169143676758
V
-1,0
BOT
0,8.01383333333333
V
0,2.62260437011719
V
-1,0
BOT
0,8.0205
V
0,2.59304046630859
V
-1,0
BOT
0,8.02716666666667
V
0,2.56443023681641
V
-1,0
BOT
0,8.03383333333333
V
0,2.53534317016602
V
-1,0
BOT
0,8.0405
V
0,2.50768661499023
V
-1,0
BOT
0,8.04716666666667
V
0,2.48050689697266
V
-1,0
BOT
0,8.05383333333333
V
0,2.45523452758789
V
-1,0
BOT
0,8.0605
V
0,2.43234634399414
V
-1,0
BOT
0,8.06716666666667
V
0,2.41184234619141
V
-1,0
BOT
0,8.07383333333333
V
0,2.39372253417969
V
-1,0
BOT
0,8.0805
V
0,2.37846374511719
V
-1,0
BOT
0,8.08716666666667
V
0,2.3651123046875
V
-1,0
BOT
0,8.09383333333333
V
0,2.35319137573242
V
-1,0
BOT
0,8.1005
V
0,2.34270095825195
V
-1,0
BOT
0,8.10716666666667
V
0,2.33554840087891
V
-1,0
BOT
0,8.11383333333333
V
0,2.33078002929687
V
-1,0
BOT
0,8.1205
V
0,2.32839584350586
V
-1,0
BOT
0,8.12716666666667
V
0,2.32791900634766
V
-1,0
BOT
0,8.13383333333333
V
0,2.32839584350586
V
-1,0
BOT
0,8.1405
V
0,2.32839584350586
V
-1,0
BOT
0,8.14716666666667
V
0,2.32696533203125
V
-1,0
BOT
0,8.15383333333333
V
0,2.32410430908203
V
-1,0
BOT
0,8.1605
V
0,2.32028961181641
V
-1,0
BOT
0,8.16716666666667
V
0,2.31504440307617
V
-1,0
BOT
0,8.17383333333333
V
0,2.30741500854492
V
-1,0
BOT
0,8.1805
V
0,2.29835510253906
V
-1,0
BOT
0,8.18716666666667
V
0,2.28738784790039
V
-1,0
BOT
0,8.19383333333333
V
0,2.27451324462891
V
-1,0
BOT
0,8.2005
V
0,2.25925445556641
V
-1,0
BOT
0,8.20716666666667
V
0,2.24113464355469
V
-1,0
BOT
0,8.21383333333333
V
0,2.22158432006836
V
-1,0
BOT
0,8.2205
V
0,2.20108032226562
V
-1,0
BOT
0,8.22716666666667
V
0,2.18057632446289
V
-1,0
BOT
0,8.23383333333333
V
0,2.15911865234375
V
-1,0
BOT
0,8.2405
V
0,2.13813781738281
V
-1,0
BOT
0,8.24716666666667
V
0,2.11858749389648
V
-1,0
BOT
0,8.25383333333333
V
0,2.10142135620117
V
-1,0
BOT
0,8.2605
V
0,2.08520889282227
V
-1,0
BOT
0,8.26716666666667
V
0,2.06995010375977
V
-1,0
BOT
0,8.27383333333333
V
0,2.05564498901367
V
-1,0
BOT
0,8.2805
V
0,2.04229354858398
V
-1,0
BOT
0,8.28716666666667
V
0,2.0294189453125
V
-1,0
BOT
0,8.29383333333333
V
0,2.01702117919922
V
-1,0
BOT
0,8.3005
V
0,2.00510025024414
V
-1,0
BOT
0,8.30716666666667
V
0,1.99413299560547
V
-1,0
BOT
0,8.31383333333333
V
0,1.983642578125
V
-1,0
BOT
0,8.3205
V
0,1.97458267211914
V
-1,0
BOT
0,8.32716666666667
V
0,1.96552276611328
V
-1,0
BOT
0,8.33383333333333
V
0,1.95789337158203
V
-1,0
BOT
0,8.3405
V
0,1.95026397705078
V
-1,0
BOT
0,8.34716666666667
V
0,1.94406509399414
V
-1,0
BOT
0,8.35383333333333
V
0,1.94025039672852
V
-1,0
BOT
0,8.3605
V
0,1.93691253662109
V
-1,0
BOT
0,8.36716666666667
V
0,1.93548202514648
V
-1,0
BOT
0,8.37383333333333
V
0,1.93500518798828
V
-1,0
BOT
0,8.3805
V
0,1.9373893737793
V
-1,0
BOT
0,8.38716666666667
V
0,1.94263458251953
V
-1,0
BOT
0,8.39383333333333
V
0,1.95074081420898
V
-1,0
BOT
0,8.4005
V
0,1.96361541748047
V
-1,0
BOT
0,8.40716666666667
V
0,1.98221206665039
V
-1,0
BOT
0,8.41383333333333
V
0,2.00653076171875
V
-1,0
BOT
0,8.4205
V
0,2.03657150268555
V
-1,0
BOT
0,8.42716666666667
V
0,2.07281112670898
V
-1,0
BOT
0,8.43383333333333
V
0,2.11572647094727
V
-1,0
BOT
0,8.4405
V
0,2.1662712097168
V
-1,0
BOT
0,8.44716666666667
V
0,2.22396850585937
V
-1,0
BOT
0,8.45383333333333
V
0,2.29120254516602
V
-1,0
BOT
0,8.4605
V
0,2.36749649047852
V
-1,0
BOT
0,8.46716666666667
V
0,2.45285034179687
V
-1,0
BOT
0,8.47383333333333
V
0,2.54583358764648
V
-1,0
BOT
0,8.4805
V
0,2.64549255371094
V
-1,0
BOT
0,8.48716666666667
V
0,2.75087356567383
V
-1,0
BOT
0,8.49383333333333
V
0,2.85863876342773
V
-1,0
BOT
0,8.5005
V
0,2.96545028686523
V
-1,0
BOT
0,8.50716666666667
V
0,3.06940078735352
V
-1,0
BOT
0,8.51383333333333
V
0,3.16762924194336
V
-1,0
BOT
0,8.5205
V
0,3.25822830200195
V
-1,0
BOT
0,8.52716666666667
V
0,3.33786010742187
V
-1,0
BOT
0,8.53383333333333
V
0,3.40414047241211
V
-1,0
BOT
0,8.5405
V
0,3.45706939697266
V
-1,0
BOT
0,8.54716666666667
V
0,3.49521636962891
V
-1,0
BOT
0,8.55383333333333
V
0,3.51762771606445
V
-1,0
BOT
0,8.5605
V
0,3.52334976196289
V
-1,0
BOT
0,8.56716666666667
V
0,3.51238250732422
V
-1,0
BOT
0,8.57383333333333
V
0,3.48663330078125
V
-1,0
BOT
0,8.5805
V
0,3.44657897949219
V
-1,0
BOT
0,8.58716666666667
V
0,3.39508056640625
V
-1,0
BOT
0,8.59383333333333
V
0,3.33499908447266
V
-1,0
BOT
0,8.6005
V
0,3.26919555664062
V
-1,0
BOT
0,8.60716666666667
V
0,3.19862365722656
V
-1,0
BOT
0,8.61383333333333
V
0,3.12614440917969
V
-1,0
BOT
0,8.6205
V
0,3.05366516113281
V
-1,0
BOT
0,8.62716666666667
V
0,2.98261642456055
V
-1,0
BOT
0,8.63383333333333
V
0,2.9139518737793
V
-1,0
BOT
0,8.6405
V
0,2.84814834594727
V
-1,0
BOT
0,8.64716666666667
V
0,2.78663635253906
V
-1,0
BOT
0,8.65383333333333
V
0,2.72941589355469
V
-1,0
BOT
0,8.6605
V
0,2.67696380615234
V
-1,0
BOT
0,8.66716666666667
V
0,2.62928009033203
V
-1,0
BOT
0,8.67383333333333
V
0,2.58636474609375
V
-1,0
BOT
0,8.6805
V
0,2.54726409912109
V
-1,0
BOT
0,8.68716666666667
V
0,2.51293182373047
V
-1,0
BOT
0,8.69383333333333
V
0,2.48336791992187
V
-1,0
BOT
0,8.7005
V
0,2.4566650390625
V
-1,0
BOT
0,8.70716666666667
V
0,2.43234634399414
V
-1,0
BOT
0,8.71383333333333
V
0,2.4113655090332
V
-1,0
BOT
0,8.7205
V
0,2.39133834838867
V
-1,0
BOT
0,8.72716666666667
V
0,2.37321853637695
V
-1,0
BOT
0,8.73383333333333
V
0,2.35462188720703
V
-1,0
BOT
0,8.7405
V
0,2.33745574951172
V
-1,0
BOT
0,8.74716666666667
V
0,2.32028961181641
V
-1,0
BOT
0,8.75383333333333
V
0,2.30312347412109
V
-1,0
BOT
0,8.7605
V
0,2.28691101074219
V
-1,0
BOT
0,8.76716666666667
V
0,2.27117538452148
V
-1,0
BOT
0,8.77383333333333
V
0,2.25687026977539
V
-1,0
BOT
0,8.7805
V
0,2.2425651550293
V
-1,0
BOT
0,8.78716666666667
V
0,2.22921371459961
V
-1,0
BOT
0,8.79383333333333
V
0,2.21729278564453
V
-1,0
BOT
0,8.8005
V
0,2.20680236816406
V
-1,0
BOT
0,8.80716666666667
V
0,2.1977424621582
V
-1,0
BOT
0,8.81383333333333
V
0,2.19011306762695
V
-1,0
BOT
0,8.8205
V
0,2.18486785888672
V
-1,0
BOT
0,8.82716666666667
V
0,2.1815299987793
V
-1,0
BOT
0,8.83383333333333
V
0,2.18057632446289
V
-1,0
BOT
0,8.8405
V
0,2.18105316162109
V
-1,0
BOT
0,8.84716666666667
V
0,2.1820068359375
V
-1,0
BOT
0,8.85383333333333
V
0,2.18296051025391
V
-1,0
BOT
0,8.8605
V
0,2.18343734741211
V
-1,0
BOT
0,8.86716666666667
V
0,2.18391418457031
V
-1,0
BOT
0,8.87383333333333
V
0,2.18582153320312
V
-1,0
BOT
0,8.8805
V
0,2.18868255615234
V
-1,0
BOT
0,8.88716666666667
V
0,2.19297409057617
V
-1,0
BOT
0,8.89383333333333
V
0,2.19917297363281
V
-1,0
BOT
0,8.9005
V
0,2.20727920532227
V
-1,0
BOT
0,8.90716666666667
V
0,2.21586227416992
V
-1,0
BOT
0,8.91383333333333
V
0,2.22396850585937
V
-1,0
BOT
0,8.9205
V
0,2.23112106323242
V
-1,0
BOT
0,8.92716666666667
V
0,2.23875045776367
V
-1,0
BOT
0,8.93383333333333
V
0,2.24637985229492
V
-1,0
BOT
0,8.9405
V
0,2.25353240966797
V
-1,0
BOT
0,8.94716666666667
V
0,2.25973129272461
V
-1,0
BOT
0,8.95383333333333
V
0,2.26449966430664
V
-1,0
BOT
0,8.9605
V
0,2.26783752441406
V
-1,0
BOT
0,8.96716666666667
V
0,2.26926803588867
V
-1,0
BOT
0,8.97383333333333
V
0,2.26593017578125
V
-1,0
BOT
0,8.9805
V
0,2.25925445556641
V
-1,0
BOT
0,8.98716666666667
V
0,2.24876403808594
V
-1,0
BOT
0,8.99383333333333
V
0,2.23588943481445
V
-1,0
BOT
0,9.0005
V
0,2.21872329711914
V
-1,0
BOT
0,9.00716666666667
V
0,2.19917297363281
V
-1,0
BOT
0,9.01383333333333
V
0,2.17723846435547
V
-1,0
BOT
0,9.0205
V
0,2.15387344360352
V
-1,0
BOT
0,9.02716666666667
V
0,2.12812423706055
V
-1,0
BOT
0,9.03383333333333
V
0,2.10094451904297
V
-1,0
BOT
0,9.0405
V
0,2.07376480102539
V
-1,0
BOT
0,9.04716666666667
V
0,2.04706192016602
V
-1,0
BOT
0,9.05383333333333
V
0,2.02083587646484
V
-1,0
BOT
0,9.0605
V
0,1.99604034423828
V
-1,0
BOT
0,9.06716666666667
V
0,1.97172164916992
V
-1,0
BOT
0,9.07383333333333
V
0,1.94931030273437
V
-1,0
BOT
0,9.0805
V
0,1.92737579345703
V
-1,0
BOT
0,9.08716666666667
V
0,1.9073486328125
V
-1,0
BOT
0,9.09383333333333
V
0,1.88827514648437
V
-1,0
BOT
0,9.1005
V
0,1.86920166015625
V
-1,0
BOT
0,9.10716666666667
V
0,1.85060501098633
V
-1,0
BOT
0,9.11383333333333
V
0,1.83200836181641
V
-1,0
BOT
0,9.1205
V
0,1.81341171264648
V
-1,0
BOT
0,9.12716666666667
V
0,1.79481506347656
V
-1,0
BOT
0,9.13383333333333
V
0,1.77621841430664
V
-1,0
BOT
0,9.1405
V
0,1.75809860229492
V
-1,0
BOT
0,9.14716666666667
V
0,1.74140930175781
V
-1,0
BOT
0,9.15383333333333
V
0,1.72519683837891
V
-1,0
BOT
0,9.1605
V
0,1.7085075378418
V
-1,0
BOT
0,9.16716666666667
V
0,1.69181823730469
V
-1,0
BOT
0,9.17383333333333
V
0,1.67465209960937
V
-1,0
BOT
0,9.1805
V
0,1.65843963623047
V
-1,0
BOT
0,9.18716666666667
V
0,1.64365768432617
V
-1,0
BOT
0,9.19383333333333
V
0,1.62935256958008
V
-1,0
BOT
0,9.2005
V
0,1.61552429199219
V
-1,0
BOT
0,9.20716666666667
V
0,1.6026496887207
V
-1,0
BOT
0,9.21383333333333
V
0,1.58977508544922
V
-1,0
BOT
0,9.2205
V
0,1.57642364501953
V
-1,0
BOT
0,9.22716666666667
V
0,1.56354904174805
V
-1,0
BOT
0,9.23383333333333
V
0,1.55115127563477
V
-1,0
BOT
0,9.2405
V
0,1.5406608581543
V
-1,0
BOT
0,9.24716666666667
V
0,1.53303146362305
V
-1,0
BOT
0,9.25383333333333
V
0,1.52778625488281
V
-1,0
BOT
0,9.2605
V
0,1.52492523193359
V
-1,0
BOT
0,9.26716666666667
V
0,1.52397155761719
V
-1,0
BOT
0,9.27383333333333
V
0,1.52492523193359
V
-1,0
BOT
0,9.2805
V
0,1.52683258056641
V
-1,0
BOT
0,9.28716666666667
V
0,1.53112411499023
V
-1,0
BOT
0,9.29383333333333
V
0,1.53779983520508
V
-1,0
BOT
0,9.3005
V
0,1.54685974121094
V
-1,0
BOT
0,9.30716666666667
V
0,1.55925750732422
V
-1,0
BOT
0,9.31383333333333
V
0,1.57451629638672
V
-1,0
BOT
0,9.3205
V
0,1.59358978271484
V
-1,0
BOT
0,9.32716666666667
V
0,1.61504745483398
V
-1,0
BOT
0,9.33383333333333
V
0,1.64031982421875
V
-1,0
BOT
0,9.3405
V
0,1.66845321655273
V
-1,0
BOT
0,9.34716666666667
V
0,1.70087814331055
V
-1,0
BOT
0,9.35383333333333
V
0,1.73759460449219
V
-1,0
BOT
0,9.3605
V
0,1.78050994873047
V
-1,0
BOT
0,9.36716666666667
V
0,1.82962417602539
V
-1,0
BOT
0,9.37383333333333
V
0,1.88302993774414
V
-1,0
BOT
0,9.3805
V
0,1.93977355957031
V
-1,0
BOT
0,9.38716666666667
V
0,2.00033187866211
V
-1,0
BOT
0,9.39383333333333
V
0,2.06327438354492
V
-1,0
BOT
0,9.4005
V
0,2.12812423706055
V
-1,0
BOT
0,9.40716666666667
V
0,2.19392776489258
V
-1,0
BOT
0,9.41383333333333
V
0,2.25973129272461
V
-1,0
BOT
0,9.4205
V
0,2.32696533203125
V
-1,0
BOT
0,9.42716666666667
V
0,2.3956298828125
V
-1,0
BOT
0,9.43383333333333
V
0,2.46381759643555
V
-1,0
BOT
0,9.4405
V
0,2.53057479858398
V
-1,0
BOT
0,9.44716666666667
V
0,2.59590148925781
V
-1,0
BOT
0,9.45383333333333
V
0,2.66027450561523
V
-1,0
BOT
0,9.4605
V
0,2.72178649902344
V
-1,0
BOT
0,9.46716666666667
V
0,2.77948379516602
V
-1,0
BOT
0,9.47383333333333
V
0,2.83241271972656
V
-1,0
BOT
0,9.4805
V
0,2.87961959838867
V
-1,0
BOT
0,9.48716666666667
V
0,2.92015075683594
V
-1,0
BOT
0,9.49383333333333
V
0,2.95305252075195
V
-1,0
BOT
0,9.5005
V
0,2.97784805297852
V
-1,0
BOT
0,9.50716666666667
V
0,2.99549102783203
V
-1,0
BOT
0,9.51383333333333
V
0,3.0059814453125
V
-1,0
BOT
0,9.5205
V
0,3.00931930541992
V
-1,0
BOT
0,9.52716666666667
V
0,3.00455093383789
V
-1,0
BOT
0,9.53383333333333
V
0,2.9902458190918
V
-1,0
BOT
0,9.5405
V
0,2.96688079833984
V
-1,0
BOT
0,9.54716666666667
V
0,2.93445587158203
V
-1,0
BOT
0,9.55383333333333
V
0,2.89297103881836
V
-1,0
BOT
0,9.5605
V
0,2.84242630004883
V
-1,0
BOT
0,9.56716666666667
V
0,2.78377532958984
V
-1,0
BOT
0,9.57383333333333
V
0,2.72035598754883
V
-1,0
BOT
0,9.5805
V
0,2.65264511108398
V
-1,0
BOT
0,9.58716666666667
V
0,2.58016586303711
V
-1,0
BOT
0,9.59383333333333
V
0,2.50339508056641
V
-1,0
BOT
0,9.6005
V
0,2.42519378662109
V
-1,0
BOT
0,9.60716666666667
V
0,2.34699249267578
V
-1,0
BOT
0,9.61383333333333
V
0,2.26974487304687
V
-1,0
BOT
0,9.6205
V
0,2.19345092773437
V
-1,0
BOT
0,9.62716666666667
V
0,2.11906433105469
V
-1,0
BOT
0,9.63383333333333
V
0,2.04849243164062
V
-1,0
BOT
0,9.6405
V
0,1.98030471801758
V
-1,0
BOT
0,9.64716666666667
V
0,1.91450119018555
V
-1,0
BOT
0,9.65383333333333
V
0,1.85203552246094
V
-1,0
BOT
0,9.6605
V
0,1.79433822631836
V
-1,0
BOT
0,9.66716666666667
V
0,1.74093246459961
V
-1,0
BOT
0,9.67383333333333
V
0,1.69181823730469
V
-1,0
BOT
0,9.6805
V
0,1.64794921875
V
-1,0
BOT
0,9.68716666666667
V
0,1.60980224609375
V
-1,0
BOT
0,9.69383333333333
V
0,1.57594680786133
V
-1,0
BOT
0,9.7005
V
0,1.54542922973633
V
-1,0
BOT
0,9.70716666666667
V
0,1.51777267456055
V
-1,0
BOT
0,9.71383333333333
V
0,1.49393081665039
V
-1,0
BOT
0,9.7205
V
0,1.47342681884766
V
-1,0
BOT
0,9.72716666666667
V
0,1.45530700683594
V
-1,0
BOT
0,9.73383333333333
V
0,1.44052505493164
V
-1,0
BOT
0,9.7405
V
0,1.42908096313477
V
-1,0
BOT
0,9.74716666666667
V
0,1.42145156860352
V
-1,0
BOT
0,9.75383333333333
V
0,1.41572952270508
V
-1,0
BOT
0,9.7605
V
0,1.41239166259766
V
-1,0
BOT
0,9.76716666666667
V
0,1.41048431396484
V
-1,0
BOT
0,9.77383333333333
V
0,1.41048431396484
V
-1,0
BOT
0,9.7805
V
0,1.41191482543945
V
-1,0
BOT
0,9.78716666666667
V
0,1.41286849975586
V
-1,0
BOT
0,9.79383333333333
V
0,1.41429901123047
V
-1,0
BOT
0,9.8005
V
0,1.41668319702148
V
-1,0
BOT
0,9.80716666666667
V
0,1.4195442199707
V
-1,0
BOT
0,9.81383333333333
V
0,1.42192840576172
V
-1,0
BOT
0,9.8205
V
0,1.42335891723633
V
-1,0
BOT
0,9.82716666666667
V
0,1.42431259155273
V
-1,0
BOT
0,9.83383333333333
V
0,1.42526626586914
V
-1,0
BOT
0,9.8405
V
0,1.42574310302734
V
-1,0
BOT
0,9.84716666666667
V
0,1.42621994018555
V
-1,0
BOT
0,9.85383333333333
V
0,1.42526626586914
V
-1,0
BOT
0,9.8605
V
0,1.42526626586914
V
-1,0
BOT
0,9.86716666666667
V
0,1.42478942871094
V
-1,0
BOT
0,9.87383333333333
V
0,1.42478942871094
V
-1,0
BOT
0,9.8805
V
0,1.42526626586914
V
-1,0
BOT
0,9.88716666666667
V
0,1.42574310302734
V
-1,0
BOT
0,9.89383333333333
V
0,1.42765045166016
V
-1,0
BOT
0,9.9005
V
0,1.42955780029297
V
-1,0
BOT
0,9.90716666666667
V
0,1.43146514892578
V
-1,0
BOT
0,9.91383333333333
V
0,1.434326171875
V
-1,0
BOT
0,9.9205
V
0,1.43861770629883
V
-1,0
BOT
0,9.92716666666667
V
0,1.44529342651367
V
-1,0
BOT
0,9.93383333333333
V
0,1.45292282104492
V
-1,0
BOT
0,9.9405
V
0,1.46389007568359
V
-1,0
BOT
0,9.94716666666667
V
0,1.47867202758789
V
-1,0
BOT
0,9.95383333333333
V
0,1.49631500244141
V
-1,0
BOT
0,9.9605
V
0,1.51491165161133
V
-1,0
BOT
0,9.96716666666667
V
0,1.53684616088867
V
-1,0
BOT
0,9.97383333333333
V
0,1.56307220458984
V
-1,0
BOT
0,9.9805
V
0,1.59311294555664
V
-1,0
BOT
0,9.98716666666667
V
0,1.62601470947266
V
-1,0
BOT
0,9.99383333333333
V
0,1.66130065917969
V
-1,0
BOT
0,10.0005
V
0,1.69992446899414
V
-1,0
BOT
0,10.0071666666667
V
0,1.7390251159668
V
-1,0
BOT
0,10.0138333333333
V
0,1.77812576293945
V
-1,0
BOT
0,10.0205
V
0,1.8162727355957
V
-1,0
BOT
0,10.0271666666667
V
0,1.85394287109375
V
-1,0
BOT
0,10.0338333333333
V
0,1.89113616943359
V
-1,0
BOT
0,10.0405
V
0,1.92689895629883
V
-1,0
BOT
0,10.0471666666667
V
0,1.95980072021484
V
-1,0
BOT
0,10.0538333333333
V
0,1.98984146118164
V
-1,0
BOT
0,10.0605
V
0,2.01511383056641
V
-1,0
BOT
0,10.0671666666667
V
0,2.03609466552734
V
-1,0
BOT
0,10.0738333333333
V
0,2.05135345458984
V
-1,0
BOT
0,10.0805
V
0,2.06184387207031
V
-1,0
BOT
0,10.0871666666667
V
0,2.06804275512695
V
-1,0
BOT
0,10.0938333333333
V
0,2.07138061523437
V
-1,0
BOT
0,10.1005
V
0,2.07090377807617
V
-1,0
BOT
0,10.1071666666667
V
0,2.06756591796875
V
-1,0
BOT
0,10.1138333333333
V
0,2.06136703491211
V
-1,0
BOT
0,10.1205
V
0,2.05469131469727
V
-1,0
BOT
0,10.1271666666667
V
0,2.04801559448242
V
-1,0
BOT
0,10.1338333333333
V
0,2.04181671142578
V
-1,0
BOT
0,10.1405
V
0,2.03704833984375
V
-1,0
BOT
0,10.1471666666667
V
0,2.03704833984375
V
-1,0
BOT
0,10.1538333333333
V
0,2.04229354858398
V
-1,0
BOT
0,10.1605
V
0,2.05469131469727
V
-1,0
BOT
0,10.1671666666667
V
0,2.07376480102539
V
-1,0
BOT
0,10.1738333333333
V
0,2.10142135620117
V
-1,0
BOT
0,10.1805
V
0,2.13718414306641
V
-1,0
BOT
0,10.1871666666667
V
0,2.1820068359375
V
-1,0
BOT
0,10.1938333333333
V
0,2.23493576049805
V
-1,0
BOT
0,10.2005
V
0,2.29644775390625
V
-1,0
BOT
0,10.2071666666667
V
0,2.36606597900391
V
-1,0
BOT
0,10.2138333333333
V
0,2.44331359863281
V
-1,0
BOT
0,10.2205
V
0,2.52723693847656
V
-1,0
BOT
0,10.2271666666667
V
0,2.61735916137695
V
-1,0
BOT
0,10.2338333333333
V
0,2.71129608154297
V
-1,0
BOT
0,10.2405
V
0,2.80666351318359
V
-1,0
BOT
0,10.2471666666667
V
0,2.90060043334961
V
-1,0
BOT
0,10.2538333333333
V
0,2.9902458190918
V
-1,0
BOT
0,10.2605
V
0,3.07369232177734
V
-1,0
BOT
0,10.2671666666667
V
0,3.14903259277344
V
-1,0
BOT
0,10.2738333333333
V
0,3.21340560913086
V
-1,0
BOT
0,10.2805
V
0,3.2649040222168
V
-1,0
BOT
0,10.2871666666667
V
0,3.30305099487305
V
-1,0
BOT
0,10.2938333333333
V
0,3.32546234130859
V
-1,0
BOT
0,10.3005
V
0,3.33166122436523
V
-1,0
BOT
0,10.3071666666667
V
0,3.32164764404297
V
-1,0
BOT
0,10.3138333333333
V
0,3.2963752746582
V
-1,0
BOT
0,10.3205
V
0,3.25632095336914
V
-1,0
BOT
0,10.3271666666667
V
0,3.20291519165039
V
-1,0
BOT
0,10.3338333333333
V
0,3.13854217529297
V
-1,0
BOT
0,10.3405
V
0,3.06367874145508
V
-1,0
BOT
0,10.3471666666667
V
0,2.97975540161133
V
-1,0
BOT
0,10.3538333333333
V
0,2.88915634155273
V
-1,0
BOT
0,10.3605
V
0,2.79378890991211
V
-1,0
BOT
0,10.3671666666667
V
0,2.69746780395508
V
-1,0
BOT
0,10.3738333333333
V
0,2.60210037231445
V
-1,0
BOT
0,10.3805
V
0,2.51102447509766
V
-1,0
BOT
0,10.3871666666667
V
0,2.42376327514648
V
-1,0
BOT
0,10.3938333333333
V
0,2.34079360961914
V
-1,0
BOT
0,10.4005
V
0,2.26259231567383
V
-1,0
BOT
0,10.4071666666667
V
0,2.18868255615234
V
-1,0
BOT
0,10.4138333333333
V
0,2.11954116821289
V
-1,0
BOT
0,10.4205
V
0,2.05516815185547
V
-1,0
BOT
0,10.4271666666667
V
0,1.99699401855469
V
-1,0
BOT
0,10.4338333333333
V
0,1.94454193115234
V
-1,0
BOT
0,10.4405
V
0,1.89876556396484
V
-1,0
BOT
0,10.4471666666667
V
0,1.85823440551758
V
-1,0
BOT
0,10.4538333333333
V
0,1.82294845581055
V
-1,0
BOT
0,10.4605
V
0,1.79147720336914
V
-1,0
BOT
0,10.4671666666667
V
0,1.76382064819336
V
-1,0
BOT
0,10.4738333333333
V
0,1.739501953125
V
-1,0
BOT
0,10.4805
V
0,1.71661376953125
V
-1,0
BOT
0,10.4871666666667
V
0,1.69563293457031
V
-1,0
BOT
0,10.4938333333333
V
0,1.67608261108398
V
-1,0
BOT
0,10.5005
V
0,1.65843963623047
V
-1,0
BOT
0,10.5071666666667
V
0,1.64175033569336
V
-1,0
BOT
0,10.5138333333333
V
0,1.62601470947266
V
-1,0
BOT
0,10.5205
V
0,1.61075592041016
V
-1,0
BOT
0,10.5271666666667
V
0,1.59645080566406
V
-1,0
BOT
0,10.5338333333333
V
0,1.58309936523437
V
-1,0
BOT
0,10.5405
V
0,1.56927108764648
V
-1,0
BOT
0,10.5471666666667
V
0,1.55544281005859
V
-1,0
BOT
0,10.5538333333333
V
0,1.5416145324707
V
-1,0
BOT
0,10.5605
V
0,1.52969360351562
V
-1,0
BOT
0,10.5671666666667
V
0,1.52015686035156
V
-1,0
BOT
0,10.5738333333333
V
0,1.51157379150391
V
-1,0
BOT
0,10.5805
V
0,1.50442123413086
V
-1,0
BOT
0,10.5871666666667
V
0,1.49869918823242
V
-1,0
BOT
0,10.5938333333333
V
0,1.4948844909668
V
-1,0
BOT
0,10.6005
V
0,1.49202346801758
V
-1,0
BOT
0,10.6071666666667
V
0,1.48916244506836
V
-1,0
BOT
0,10.6138333333333
V
0,1.48677825927734
V
-1,0
BOT
0,10.6205
V
0,1.48582458496094
V
-1,0
BOT
0,10.6271666666667
V
0,1.48725509643555
V
-1,0
BOT
0,10.6338333333333
V
0,1.48963928222656
V
-1,0
BOT
0,10.6405
V
0,1.49250030517578
V
-1,0
BOT
0,10.6471666666667
V
0,1.49631500244141
V
-1,0
BOT
0,10.6538333333333
V
0,1.49917602539062
V
-1,0
BOT
0,10.6605
V
0,1.50012969970703
V
-1,0
BOT
0,10.6671666666667
V
0,1.49917602539062
V
-1,0
BOT
0,10.6738333333333
V
0,1.49774551391602
V
-1,0
BOT
0,10.6805
V
0,1.4958381652832
V
-1,0
BOT
0,10.6871666666667
V
0,1.49345397949219
V
-1,0
BOT
0,10.6938333333333
V
0,1.49154663085937
V
-1,0
BOT
0,10.7005
V
0,1.48963928222656
V
-1,0
BOT
0,10.7071666666667
V
0,1.48868560791016
V
-1,0
BOT
0,10.7138333333333
V
0,1.48677825927734
V
-1,0
BOT
0,10.7205
V
0,1.48344039916992
V
-1,0
BOT
0,10.7271666666667
V
0,1.47914886474609
V
-1,0
BOT
0,10.7338333333333
V
0,1.47533416748047
V
-1,0
BOT
0,10.7405
V
0,1.47199630737305
V
-1,0
BOT
0,10.7471666666667
V
0,1.46865844726562
V
-1,0
BOT
0,10.7538333333333
V
0,1.46722793579102
V
-1,0
BOT
0,10.7605
V
0,1.46818161010742
V
-1,0
BOT
0,10.7671666666667
V
0,1.47247314453125
V
-1,0
BOT
0,10.7738333333333
V
0,1.4801025390625
V
-1,0
BOT
0,10.7805
V
0,1.49154663085937
V
-1,0
BOT
0,10.7871666666667
V
0,1.50680541992187
V
-1,0
BOT
0,10.7938333333333
V
0,1.52587890625
V
-1,0
BOT
0,10.8005
V
0,1.54924392700195
V
-1,0
BOT
0,10.8071666666667
V
0,1.57546997070312
V
-1,0
BOT
0,10.8138333333333
V
0,1.60551071166992
V
-1,0
BOT
0,10.8205
V
0,1.63841247558594
V
-1,0
BOT
0,10.8271666666667
V
0,1.67512893676758
V
-1,0
BOT
0,10.8338333333333
V
0,1.71422958374023
V
-1,0
BOT
0,10.8405
V
0,1.75380706787109
V
-1,0
BOT
0,10.8471666666667
V
0,1.79386138916016
V
-1,0
BOT
0,10.8538333333333
V
0,1.83343887329102
V
-1,0
BOT
0,10.8605
V
0,1.87206268310547
V
-1,0
BOT
0,10.8671666666667
V
0,1.90830230712891
V
-1,0
BOT
0,10.8738333333333
V
0,1.94263458251953
V
-1,0
BOT
0,10.8805
V
0,1.97458267211914
V
-1,0
BOT
0,10.8871666666667
V
0,2.00319290161133
V
-1,0
BOT
0,10.8938333333333
V
0,2.02846527099609
V
-1,0
BOT
0,10.9005
V
0,2.04849243164062
V
-1,0
BOT
0,10.9071666666667
V
0,2.06470489501953
V
-1,0
BOT
0,10.9138333333333
V
0,2.07614898681641
V
-1,0
BOT
0,10.9205
V
0,2.08330154418945
V
-1,0
BOT
0,10.9271666666667
V
0,2.08711624145508
V
-1,0
BOT
0,10.9338333333333
V
0,2.08711624145508
V
-1,0
BOT
0,10.9405
V
0,2.08377838134766
V
-1,0
BOT
0,10.9471666666667
V
0,2.07662582397461
V
-1,0
BOT
0,10.9538333333333
V
0,2.06708908081055
V
-1,0
BOT
0,10.9605
V
0,2.05612182617187
V
-1,0
BOT
0,10.9671666666667
V
0,2.0442008972168
V
-1,0
BOT
0,10.9738333333333
V
0,2.03084945678711
V
-1,0
BOT
0,10.9805
V
0,2.01749801635742
V
-1,0
BOT
0,10.9871666666667
V
0,2.00510025024414
V
-1,0
BOT
0,10.9938333333333
V
0,1.99365615844727
V
-1,0
BOT
0,11.0005
V
0,1.983642578125
V
-1,0
BOT
0,11.0071666666667
V
0,1.97410583496094
V
-1,0
BOT
0,11.0138333333333
V
0,1.96552276611328
V
-1,0
BOT
0,11.0205
V
0,1.95741653442383
V
-1,0
BOT
0,11.0271666666667
V
0,1.95026397705078
V
-1,0
BOT
0,11.0338333333333
V
0,1.94311141967773
V
-1,0
BOT
0,11.0405
V
0,1.93548202514648
V
-1,0
BOT
0,11.0471666666667
V
0,1.92594528198242
V
-1,0
BOT
0,11.0538333333333
V
0,1.91497802734375
V
-1,0
BOT
0,11.0605
V
0,1.90162658691406
V
-1,0
BOT
0,11.0671666666667
V
0,1.88541412353516
V
-1,0
BOT
0,11.0738333333333
V
0,1.86586380004883
V
-1,0
BOT
0,11.0805
V
0,1.84392929077148
V
-1,0
BOT
0,11.0871666666667
V
0,1.82151794433594
V
-1,0
BOT
0,11.0938333333333
V
0,1.79672241210937
V
-1,0
BOT
0,11.1005
V
0,1.7704963684082
V
-1,0
BOT
0,11.1071666666667
V
0,1.74283981323242
V
-1,0
BOT
0,11.1138333333333
V
0,1.71375274658203
V
-1,0
BOT
0,11.1205
V
0,1.68323516845703
V
-1,0
BOT
0,11.1271666666667
V
0,1.65081024169922
V
-1,0
BOT
0,11.1338333333333
V
0,1.61647796630859
V
-1,0
BOT
0,11.1405
V
0,1.58214569091797
V
-1,0
BOT
0,11.1471666666667
V
0,1.54876708984375
V
-1,0
BOT
0,11.1538333333333
V
0,1.51634216308594
V
-1,0
BOT
0,11.1605
V
0,1.48534774780273
V
-1,0
BOT
0,11.1671666666667
V
0,1.45626068115234
V
-1,0
BOT
0,11.1738333333333
V
0,1.43051147460937
V
-1,0
BOT
0,11.1805
V
0,1.40762329101562
V
-1,0
BOT
0,11.1871666666667
V
0,1.38711929321289
V
-1,0
BOT
0,11.1938333333333
V
0,1.36899948120117
V
-1,0
BOT
0,11.2005
V
0,1.35374069213867
V
-1,0
BOT
0,11.2071666666667
V
0,1.34086608886719
V
-1,0
BOT
0,11.2138333333333
V
0,1.33085250854492
V
-1,0
BOT
0,11.2205
V
0,1.32179260253906
V
-1,0
BOT
0,11.2271666666667
V
0,1.31607055664062
V
-1,0
BOT
0,11.2338333333333
V
0,1.31368637084961
V
-1,0
BOT
0,11.2405
V
0,1.31559371948242
V
-1,0
BOT
0,11.2471666666667
V
0,1.32036209106445
V
-1,0
BOT
0,11.2538333333333
V
0,1.3279914855957
V
-1,0
BOT
0,11.2605
V
0,1.33752822875977
V
-1,0
BOT
0,11.2671666666667
V
0,1.34849548339844
V
-1,0
BOT
0,11.2738333333333
V
0,1.36089324951172
V
-1,0
BOT
0,11.2805
V
0,1.37472152709961
V
-1,0
BOT
0,11.2871666666667
V
0,1.3890266418457
V
-1,0
BOT
0,11.2938333333333
V
0,1.4042854309082
V
-1,0
BOT
0,11.3005
V
0,1.42145156860352
V
-1,0
BOT
0,11.3071666666667
V
0,1.44004821777344
V
-1,0
BOT
0,11.3138333333333
V
0,1.45721435546875
V
-1,0
BOT
0,11.3205
V
0,1.47247314453125
V
-1,0
BOT
0,11.3271666666667
V
0,1.48582458496094
V
-1,0
BOT
0,11.3338333333333
V
0,1.49822235107422
V
-1,0
BOT
0,11.3405
V
0,1.50728225708008
V
-1,0
BOT
0,11.3471666666667
V
0,1.51348114013672
V
-1,0
BOT
0,11.3538333333333
V
0,1.51872634887695
V
-1,0
BOT
0,11.3605
V
0,1.52349472045898
V
-1,0
BOT
0,11.3671666666667
V
0,1.52683258056641
V
-1,0
BOT
0,11.3738333333333
V
0,1.52826309204102
V
-1,0
BOT
0,11.3805
V
0,1.52873992919922
V
-1,0
BOT
0,11.3871666666667
V
0,1.52873992919922
V
-1,0
BOT
0,11.3938333333333
V
0,1.52778625488281
V
-1,0
BOT
0,11.4005
V
0,1.5254020690918
V
-1,0
BOT
0,11.4071666666667
V
0,1.52349472045898
V
-1,0
BOT
0,11.4138333333333
V
0,1.52254104614258
V
-1,0
BOT
0,11.4205
V
0,1.52206420898437
V
-1,0
BOT
0,11.4271666666667
V
0,1.52206420898437
V
-1,0
BOT
0,11.4338333333333
V
0,1.52206420898437
V
-1,0
BOT
0,11.4405
V
0,1.52492523193359
V
-1,0
BOT
0,11.4471666666667
V
0,1.52969360351562
V
-1,0
BOT
0,11.4538333333333
V
0,1.53684616088867
V
-1,0
BOT
0,11.4605
V
0,1.54447555541992
V
-1,0
BOT
0,11.4671666666667
V
0,1.55401229858398
V
-1,0
BOT
0,11.4738333333333
V
0,1.56593322753906
V
-1,0
BOT
0,11.4805
V
0,1.57833099365234
V
-1,0
BOT
0,11.4871666666667
V
0,1.59120559692383
V
-1,0
BOT
0,11.4938333333333
V
0,1.60312652587891
V
-1,0
BOT
0,11.5005
V
0,1.61552429199219
V
-1,0
BOT
0,11.5071666666667
V
0,1.62839889526367
V
-1,0
BOT
0,11.5138333333333
V
0,1.63936614990234
V
-1,0
BOT
0,11.5205
V
0,1.6484260559082
V
-1,0
BOT
0,11.5271666666667
V
0,1.65510177612305
V
-1,0
BOT
0,11.5338333333333
V
0,1.65939331054687
V
-1,0
BOT
0,11.5405
V
0,1.66082382202148
V
-1,0
BOT
0,11.5471666666667
V
0,1.65987014770508
V
-1,0
BOT
0,11.5538333333333
V
0,1.65891647338867
V
-1,0
BOT
0,11.5605
V
0,1.65605545043945
V
-1,0
BOT
0,11.5671666666667
V
0,1.65176391601562
V
-1,0
BOT
0,11.5738333333333
V
0,1.6474723815918
V
-1,0
BOT
0,11.5805
V
0,1.64318084716797
V
-1,0
BOT
0,11.5871666666667
V
0,1.63936614990234
V
-1,0
BOT
0,11.5938333333333
V
0,1.63459777832031
V
-1,0
BOT
0,11.6005
V
0,1.63030624389648
V
-1,0
BOT
0,11.6071666666667
V
0,1.62744522094727
V
-1,0
BOT
0,11.6138333333333
V
0,1.62553787231445
V
-1,0
BOT
0,11.6205
V
0,1.62458419799805
V
-1,0
BOT
0,11.6271666666667
V
0,1.62458419799805
V
-1,0
BOT
0,11.6338333333333
V
0,1.62458419799805
V
-1,0
BOT
0,11.6405
V
0,1.62506103515625
V
-1,0
BOT
0,11.6471666666667
V
0,1.62601470947266
V
-1,0
BOT
0,11.6538333333333
V
0,1.62887573242187
V
-1,0
BOT
0,11.6605
V
0,1.63364410400391
V
-1,0
BOT
0,11.6671666666667
V
0,1.63936614990234
V
-1,0
BOT
0,11.6738333333333
V
0,1.64651870727539
V
-1,0
BOT
0,11.6805
V
0,1.65414810180664
V
-1,0
BOT
0,11.6871666666667
V
0,1.66225433349609
V
-1,0
BOT
0,11.6938333333333
V
0,1.66940689086914
V
-1,0
BOT
0,11.7005
V
0,1.67560577392578
V
-1,0
BOT
0,11.7071666666667
V
0,1.67989730834961
V
-1,0
BOT
0,11.7138333333333
V
0,1.68323516845703
V
-1,0
BOT
0,11.7205
V
0,1.68561935424805
V
-1,0
BOT
0,11.7271666666667
V
0,1.68704986572266
V
-1,0
BOT
0,11.7338333333333
V
0,1.68800354003906
V
-1,0
BOT
0,11.7405
V
0,1.68800354003906
V
-1,0
BOT
0,11.7471666666667
V
0,1.68657302856445
V
-1,0
BOT
0,11.7538333333333
V
0,1.68275833129883
V
-1,0
BOT
0,11.7605
V
0,1.67751312255859
V
-1,0
BOT
0,11.7671666666667
V
0,1.67036056518555
V
-1,0
BOT
0,11.7738333333333
V
0,1.66225433349609
V
-1,0
BOT
0,11.7805
V
0,1.65367126464844
V
-1,0
BOT
0,11.7871666666667
V
0,1.64604187011719
V
-1,0
BOT
0,11.7938333333333
V
0,1.64079666137695
V
-1,0
BOT
0,11.8005
V
0,1.63698196411133
V
-1,0
BOT
0,11.8071666666667
V
0,1.63555145263672
V
-1,0
BOT
0,11.8138333333333
V
0,1.63650512695312
V
-1,0
BOT
0,11.8205
V
0,1.63984298706055
V
-1,0
BOT
0,11.8271666666667
V
0,1.64651870727539
V
-1,0
BOT
0,11.8338333333333
V
0,1.65605545043945
V
-1,0
BOT
0,11.8405
V
0,1.66797637939453
V
-1,0
BOT
0,11.8471666666667
V
0,1.68323516845703
V
-1,0
BOT
0,11.8538333333333
V
0,1.70230865478516
V
-1,0
BOT
0,11.8605
V
0,1.72519683837891
V
-1,0
BOT
0,11.8671666666667
V
0,1.75142288208008
V
-1,0
BOT
0,11.8738333333333
V
0,1.78003311157227
V
-1,0
BOT
0,11.8805
V
0,1.81102752685547
V
-1,0
BOT
0,11.8871666666667
V
0,1.84392929077148
V
-1,0
BOT
0,11.8938333333333
V
0,1.8763542175293
V
-1,0
BOT
0,11.9005
V
0,1.90639495849609
V
-1,0
BOT
0,11.9071666666667
V
0,1.93405151367187
V
-1,0
BOT
0,11.9138333333333
V
0,1.95884704589844
V
-1,0
BOT
0,11.9205
V
0,1.97982788085937
V
-1,0
BOT
0,11.9271666666667
V
0,1.99556350708008
V
-1,0
BOT
0,11.9338333333333
V
0,2.00605392456055
V
-1,0
BOT
0,11.9405
V
0,2.01129913330078
V
-1,0
BOT
0,11.9471666666667
V
0,2.01225280761719
V
-1,0
BOT
0,11.9538333333333
V
0,2.00843811035156
V
-1,0
BOT
0,11.9605
V
0,1.99985504150391
V
-1,0
BOT
0,11.9671666666667
V
0,1.98698043823242
V
-1,0
BOT
0,11.9738333333333
V
0,1.96981430053711
V
-1,0
BOT
0,11.9805
V
0,1.94787979125977
V
-1,0
BOT
0,11.9871666666667
V
0,1.92165374755859
V
-1,0
BOT
0,11.9938333333333
V
0,1.8925666809082
V
-1,0
BOT
0,12.0005
V
0,1.86014175415039
V
-1,0
BOT
0,12.0071666666667
V
0,1.82533264160156
V
-1,0
BOT
0,12.0138333333333
V
0,1.78956985473633
V
-1,0
BOT
0,12.0205
V
0,1.7542839050293
V
-1,0
BOT
0,12.0271666666667
V
0,1.71899795532227
V
-1,0
BOT
0,12.0338333333333
V
0,1.68466567993164
V
-1,0
BOT
0,12.0405
V
0,1.65176391601562
V
-1,0
BOT
0,12.0471666666667
V
0,1.61981582641602
V
-1,0
BOT
0,12.0538333333333
V
0,1.59072875976562
V
-1,0
BOT
0,12.0605
V
0,1.56307220458984
V
-1,0
BOT
0,12.0671666666667
V
0,1.53732299804687
V
-1,0
BOT
0,12.0738333333333
V
0,1.51348114013672
V
-1,0
BOT
0,12.0805
V
0,1.49106979370117
V
-1,0
BOT
0,12.0871666666667
V
0,1.47104263305664
V
-1,0
BOT
0,12.0938333333333
V
0,1.45196914672852
V
-1,0
BOT
0,12.1005
V
0,1.4338493347168
V
-1,0
BOT
0,12.1071666666667
V
0,1.41716003417969
V
-1,0
BOT
0,12.1138333333333
V
0,1.40190124511719
V
-1,0
BOT
0,12.1205
V
0,1.3880729675293
V
-1,0
BOT
0,12.1271666666667
V
0,1.37615203857422
V
-1,0
BOT
0,12.1338333333333
V
0,1.36661529541016
V
-1,0
BOT
0,12.1405
V
0,1.35946273803711
V
-1,0
BOT
0,12.1471666666667
V
0,1.35374069213867
V
-1,0
BOT
0,12.1538333333333
V
0,1.34849548339844
V
-1,0
BOT
0,12.1605
V
0,1.34515762329102
V
-1,0
BOT
0,12.1671666666667
V
0,1.34468078613281
V
-1,0
BOT
0,12.1738333333333
V
0,1.34515762329102
V
-1,0
BOT
0,12.1805
V
0,1.34706497192383
V
-1,0
BOT
0,12.1871666666667
V
0,1.34992599487305
V
-1,0
BOT
0,12.1938333333333
V
0,1.35564804077148
V
-1,0
BOT
0,12.2005
V
0,1.36280059814453
V
-1,0
BOT
0,12.2071666666667
V
0,1.37042999267578
V
-1,0
BOT
0,12.2138333333333
V
0,1.37805938720703
V
-1,0
BOT
0,12.2205
V
0,1.38473510742187
V
-1,0
BOT
0,12.2271666666667
V
0,1.39141082763672
V
-1,0
BOT
0,12.2338333333333
V
0,1.39808654785156
V
-1,0
BOT
0,12.2405
V
0,1.40476226806641
V
-1,0
BOT
0,12.2471666666667
V
0,1.41048431396484
V
-1,0
BOT
0,12.2538333333333
V
0,1.41477584838867
V
-1,0
BOT
0,12.2605
V
0,1.41811370849609
V
-1,0
BOT
0,12.2671666666667
V
0,1.4190673828125
V
-1,0
BOT
0,12.2738333333333
V
0,1.41668319702148
V
-1,0
BOT
0,12.2805
V
0,1.41048431396484
V
-1,0
BOT
0,12.2871666666667
V
0,1.40142440795898
V
-1,0
BOT
0,12.2938333333333
V
0,1.38950347900391
V
-1,0
BOT
0,12.3005
V
0,1.37615203857422
V
-1,0
BOT
0,12.3071666666667
V
0,1.36184692382812
V
-1,0
BOT
0,12.3138333333333
V
0,1.34658813476562
V
-1,0
BOT
0,12.3205
V
0,1.33037567138672
V
-1,0
BOT
0,12.3271666666667
V
0,1.31464004516602
V
-1,0
BOT
0,12.3338333333333
V
0,1.29985809326172
V
-1,0
BOT
0,12.3405
V
0,1.28602981567383
V
-1,0
BOT
0,12.3471666666667
V
0,1.27220153808594
V
-1,0
BOT
0,12.3538333333333
V
0,1.25837326049805
V
-1,0
BOT
0,12.3605
V
0,1.24549865722656
V
-1,0
BOT
0,12.3671666666667
V
0,1.23310089111328
V
-1,0
BOT
0,12.3738333333333
V
0,1.2211799621582
V
-1,0
BOT
0,12.3805
V
0,1.20973587036133
V
-1,0
BOT
0,12.3871666666667
V
0,1.20019912719727
V
-1,0
BOT
0,12.3938333333333
V
0,1.19495391845703
V
-1,0
BOT
0,12.4005
V
0,1.19209289550781
V
-1,0
BOT
0,12.4071666666667
V
0,1.19113922119141
V
-1,0
BOT
0,12.4138333333333
V
0,1.1906623840332
V
-1,0
BOT
0,12.4205
V
0,1.19209289550781
V
-1,0
BOT
0,12.4271666666667
V
0,1.19400024414062
V
-1,0
BOT
0,12.4338333333333
V
0,1.19590759277344
V
-1,0
BOT
0,12.4405
V
0,1.19876861572266
V
-1,0
BOT
0,12.4471666666667
V
0,1.20449066162109
V
-1,0
BOT
0,12.4538333333333
V
0,1.21164321899414
V
-1,0
BOT
0,12.4605
V
0,1.21879577636719
V
-1,0
BOT
0,12.4671666666667
V
0,1.22499465942383
V
-1,0
BOT
0,12.4738333333333
V
0,1.22976303100586
V
-1,0
BOT
0,12.4805
V
0,1.23357772827148
V
-1,0
BOT
0,12.4871666666667
V
0,1.2354850769043
V
-1,0
BOT
0,12.4938333333333
V
0,1.23691558837891
V
-1,0
BOT
0,12.5005
V
0,1.23834609985352
V
-1,0
BOT
0,12.5071666666667
V
0,1.24025344848633
V
-1,0
BOT
0,12.5138333333333
V
0,1.24168395996094
V
-1,0
BOT
0,12.5205
V
0,1.24120712280273
V
-1,0
BOT
0,12.5271666666667
V
0,1.23882293701172
V
-1,0
BOT
0,12.5338333333333
V
0,1.23405456542969
V
-1,0
BOT
0,12.5405
V
0,1.22785568237305
V
-1,0
BOT
0,12.5471666666667
V
0,1.220703125
V
-1,0
BOT
0,12.5538333333333
V
0,1.21402740478516
V
-1,0
BOT
0,12.5605
V
0,1.20639801025391
V
-1,0
BOT
0,12.5671666666667
V
0,1.19924545288086
V
-1,0
BOT
0,12.5738333333333
V
0,1.19161605834961
V
-1,0
BOT
0,12.5805
V
0,1.18541717529297
V
-1,0
BOT
0,12.5871666666667
V
0,1.17969512939453
V
-1,0
BOT
0,12.5938333333333
V
0,1.1744499206543
V
-1,0
BOT
0,12.6005
V
0,1.17063522338867
V
-1,0
BOT
0,12.6071666666667
V
0,1.16777420043945
V
-1,0
BOT
0,12.6138333333333
V
0,1.16729736328125
V
-1,0
BOT
0,12.6205
V
0,1.16777420043945
V
-1,0
BOT
0,12.6271666666667
V
0,1.16872787475586
V
-1,0
BOT
0,12.6338333333333
V
0,1.16968154907227
V
-1,0
BOT
0,12.6405
V
0,1.17254257202148
V
-1,0
BOT
0,12.6471666666667
V
0,1.17683410644531
V
-1,0
BOT
0,12.6538333333333
V
0,1.18160247802734
V
-1,0
BOT
0,12.6605
V
0,1.18684768676758
V
-1,0
BOT
0,12.6671666666667
V
0,1.19256973266602
V
-1,0
BOT
0,12.6738333333333
V
0,1.19829177856445
V
-1,0
BOT
0,12.6805
V
0,1.20258331298828
V
-1,0
BOT
0,12.6871666666667
V
0,1.2049674987793
V
-1,0
BOT
0,12.6938333333333
V
0,1.20639801025391
V
-1,0
BOT
0,12.7005
V
0,1.20639801025391
V
-1,0
BOT
0,12.7071666666667
V
0,1.2049674987793
V
-1,0
BOT
0,12.7138333333333
V
0,1.20306015014648
V
-1,0
BOT
0,12.7205
V
0,1.20019912719727
V
-1,0
BOT
0,12.7271666666667
V
0,1.19686126708984
V
-1,0
BOT
0,12.7338333333333
V
0,1.19304656982422
V
-1,0
BOT
0,12.7405
V
0,1.18780136108398
V
-1,0
BOT
0,12.7471666666667
V
0,1.18160247802734
V
-1,0
BOT
0,12.7538333333333
V
0,1.1749267578125
V
-1,0
BOT
0,12.7605
V
0,1.16825103759766
V
-1,0
BOT
0,12.7671666666667
V
0,1.16062164306641
V
-1,0
BOT
0,12.7738333333333
V
0,1.15251541137695
V
-1,0
BOT
0,12.7805
V
0,1.14297866821289
V
-1,0
BOT
0,12.7871666666667
V
0,1.13344192504883
V
-1,0
BOT
0,12.7938333333333
V
0,1.12342834472656
V
-1,0
BOT
0,12.8005
V
0,1.1134147644043
V
-1,0
BOT
0,12.8071666666667
V
0,1.10435485839844
V
-1,0
BOT
0,12.8138333333333
V
0,1.09624862670898
V
-1,0
BOT
0,12.8205
V
0,1.08814239501953
V
-1,0
BOT
0,12.8271666666667
V
0,1.08003616333008
V
-1,0
BOT
0,12.8338333333333
V
0,1.07336044311523
V
-1,0
BOT
0,12.8405
V
0,1.06716156005859
V
-1,0
BOT
0,12.8471666666667
V
0,1.06191635131836
V
-1,0
BOT
0,12.8538333333333
V
0,1.05857849121094
V
-1,0
BOT
0,12.8605
V
0,1.05762481689453
V
-1,0
BOT
0,12.8671666666667
V
0,1.06000900268555
V
-1,0
BOT
0,12.8738333333333
V
0,1.06477737426758
V
-1,0
BOT
0,12.8805
V
0,1.07097625732422
V
-1,0
BOT
0,12.8871666666667
V
0,1.07717514038086
V
-1,0
BOT
0,12.8938333333333
V
0,1.08480453491211
V
-1,0
BOT
0,12.9005
V
0,1.09243392944336
V
-1,0
BOT
0,12.9071666666667
V
0,1.09958648681641
V
-1,0
BOT
0,12.9138333333333
V
0,1.10673904418945
V
-1,0
BOT
0,12.9205
V
0,1.1143684387207
V
-1,0
BOT
0,12.9271666666667
V
0,1.12342834472656
V
-1,0
BOT
0,12.9338333333333
V
0,1.13296508789062
V
-1,0
BOT
0,12.9405
V
0,1.1439323425293
V
-1,0
BOT
0,12.9471666666667
V
0,1.15489959716797
V
-1,0
BOT
0,12.9538333333333
V
0,1.16443634033203
V
-1,0
BOT
0,12.9605
V
0,1.17254257202148
V
-1,0
BOT
0,12.9671666666667
V
0,1.17874145507812
V
-1,0
BOT
0,12.9738333333333
V
0,1.18255615234375
V
-1,0
BOT
0,12.9805
V
0,1.18446350097656
V
-1,0
BOT
0,12.9871666666667
V
0,1.18398666381836
V
-1,0
BOT
0,12.9938333333333
V
0,1.18160247802734
V
-1,0
BOT
0,13.0005
V
0,1.17778778076172
V
-1,0
BOT
0,13.0071666666667
V
0,1.17158889770508
V
-1,0
BOT
0,13.0138333333333
V
0,1.16252899169922
V
-1,0
BOT
0,13.0205
V
0,1.15203857421875
V
-1,0
BOT
0,13.0271666666667
V
0,1.14107131958008
V
-1,0
BOT
0,13.0338333333333
V
0,1.129150390625
V
-1,0
BOT
0,13.0405
V
0,1.11627578735352
V
-1,0
BOT
0,13.0471666666667
V
0,1.10435485839844
V
-1,0
BOT
0,13.0538333333333
V
0,1.09434127807617
V
-1,0
BOT
0,13.0605
V
0,1.08480453491211
V
-1,0
BOT
0,13.0671666666667
V
0,1.07526779174805
V
-1,0
BOT
0,13.0738333333333
V
0,1.06620788574219
V
-1,0
BOT
0,13.0805
V
0,1.05905532836914
V
-1,0
BOT
0,13.0871666666667
V
0,1.05428695678711
V
-1,0
BOT
0,13.0938333333333
V
0,1.05047225952148
V
-1,0
BOT
0,13.1005
V
0,1.04808807373047
V
-1,0
BOT
0,13.1071666666667
V
0,1.04713439941406
V
-1,0
BOT
0,13.1138333333333
V
0,1.04808807373047
V
-1,0
BOT
0,13.1205
V
0,1.04951858520508
V
-1,0
BOT
0,13.1271666666667
V
0,1.0523796081543
V
-1,0
BOT
0,13.1338333333333
V
0,1.05714797973633
V
-1,0
BOT
0,13.1405
V
0,1.06334686279297
V
-1,0
BOT
0,13.1471666666667
V
0,1.07049942016602
V
-1,0
BOT
0,13.1538333333333
V
0,1.07812881469727
V
-1,0
BOT
0,13.1605
V
0,1.08623504638672
V
-1,0
BOT
0,13.1671666666667
V
0,1.09386444091797
V
-1,0
BOT
0,13.1738333333333
V
0,1.10101699829102
V
-1,0
BOT
0,13.1805
V
0,1.10626220703125
V
-1,0
BOT
0,13.1871666666667
V
0,1.11198425292969
V
-1,0
BOT
0,13.1938333333333
V
0,1.11770629882812
V
-1,0
BOT
0,13.2005
V
0,1.12247467041016
V
-1,0
BOT
0,13.2071666666667
V
0,1.12581253051758
V
-1,0
BOT
0,13.2138333333333
V
0,1.12724304199219
V
-1,0
BOT
0,13.2205
V
0,1.129150390625
V
-1,0
BOT
0,13.2271666666667
V
0,1.13201141357422
V
-1,0
BOT
0,13.2338333333333
V
0,1.13391876220703
V
-1,0
BOT
0,13.2405
V
0,1.13487243652344
V
-1,0
BOT
0,13.2471666666667
V
0,1.13582611083984
V
-1,0
BOT
0,13.2538333333333
V
0,1.13725662231445
V
-1,0
BOT
0,13.2605
V
0,1.13725662231445
V
-1,0
BOT
0,13.2671666666667
V
0,1.13630294799805
V
-1,0
BOT
0,13.2738333333333
V
0,1.13391876220703
V
-1,0
BOT
0,13.2805
V
0,1.13201141357422
V
-1,0
BOT
0,13.2871666666667
V
0,1.13058090209961
V
-1,0
BOT
0,13.2938333333333
V
0,1.1286735534668
V
-1,0
BOT
0,13.3005
V
0,1.129150390625
V
-1,0
BOT
0,13.3071666666667
V
0,1.13201141357422
V
-1,0
BOT
0,13.3138333333333
V
0,1.13821029663086
V
-1,0
BOT
0,13.3205
V
0,1.14774703979492
V
-1,0
BOT
0,13.3271666666667
V
0,1.15966796875
V
-1,0
BOT
0,13.3338333333333
V
0,1.17349624633789
V
-1,0
BOT
0,13.3405
V
0,1.18923187255859
V
-1,0
BOT
0,13.3471666666667
V
0,1.20639801025391
V
-1,0
BOT
0,13.3538333333333
V
0,1.22451782226562
V
-1,0
BOT
0,13.3605
V
0,1.24359130859375
V
-1,0
BOT
0,13.3671666666667
V
0,1.26218795776367
V
-1,0
BOT
0,13.3738333333333
V
0,1.28173828125
V
-1,0
BOT
0,13.3805
V
0,1.30176544189453
V
-1,0
BOT
0,13.3871666666667
V
0,1.32274627685547
V
-1,0
BOT
0,13.3938333333333
V
0,1.34420394897461
V
-1,0
BOT
0,13.4005
V
0,1.36470794677734
V
-1,0
BOT
0,13.4071666666667
V
0,1.38378143310547
V
-1,0
BOT
0,13.4138333333333
V
0,1.40190124511719
V
-1,0
BOT
0,13.4205
V
0,1.41811370849609
V
-1,0
BOT
0,13.4271666666667
V
0,1.43098831176758
V
-1,0
BOT
0,13.4338333333333
V
0,1.44004821777344
V
-1,0
BOT
0,13.4405
V
0,1.44624710083008
V
-1,0
BOT
0,13.4471666666667
V
0,1.45053863525391
V
-1,0
BOT
0,13.4538333333333
V
0,1.45196914672852
V
-1,0
BOT
0,13.4605
V
0,1.4500617980957
V
-1,0
BOT
0,13.4671666666667
V
0,1.44481658935547
V
-1,0
BOT
0,13.4738333333333
V
0,1.43814086914062
V
-1,0
BOT
0,13.4805
V
0,1.43003463745117
V
-1,0
BOT
0,13.4871666666667
V
0,1.42192840576172
V
-1,0
BOT
0,13.4938333333333
V
0,1.41334533691406
V
-1,0
BOT
0,13.5005
V
0,1.40476226806641
V
-1,0
BOT
0,13.5071666666667
V
0,1.39665603637695
V
-1,0
BOT
0,13.5138333333333
V
0,1.3885498046875
V
-1,0
BOT
0,13.5205
V
0,1.37996673583984
V
-1,0
BOT
0,13.5271666666667
V
0,1.37090682983398
V
-1,0
BOT
0,13.5338333333333
V
0,1.36137008666992
V
-1,0
BOT
0,13.5405
V
0,1.35087966918945
V
-1,0
BOT
0,13.5471666666667
V
0,1.34038925170898
V
-1,0
BOT
0,13.5538333333333
V
0,1.32989883422852
V
-1,0
BOT
0,13.5605
V
0,1.31845474243164
V
-1,0
BOT
0,13.5671666666667
V
0,1.30748748779297
V
-1,0
BOT
0,13.5738333333333
V
0,1.2969970703125
V
-1,0
BOT
0,13.5805
V
0,1.28650665283203
V
-1,0
BOT
0,13.5871666666667
V
0,1.27506256103516
V
-1,0
BOT
0,13.5938333333333
V
0,1.26266479492187
V
-1,0
BOT
0,13.6005
V
0,1.24931335449219
V
-1,0
BOT
0,13.6071666666667
V
0,1.2354850769043
V
-1,0
BOT
0,13.6138333333333
V
0,1.2202262878418
V
-1,0
BOT
0,13.6205
V
0,1.20449066162109
V
-1,0
BOT
0,13.6271666666667
V
0,1.1897087097168
V
-1,0
BOT
0,13.6338333333333
V
0,1.17588043212891
V
-1,0
BOT
0,13.6405
V
0,1.16109848022461
V
-1,0
BOT
0,13.6471666666667
V
0,1.14583969116211
V
-1,0
BOT
0,13.6538333333333
V
0,1.1296272277832
V
-1,0
BOT
0,13.6605
V
0,1.11293792724609
V
-1,0
BOT
0,13.6671666666667
V
0,1.09672546386719
V
-1,0
BOT
0,13.6738333333333
V
0,1.08098983764648
V
-1,0
BOT
0,13.6805
V
0,1.06716156005859
V
-1,0
BOT
0,13.6871666666667
V
0,1.05381011962891
V
-1,0
BOT
0,13.6938333333333
V
0,1.04093551635742
V
-1,0
BOT
0,13.7005
V
0,1.02853775024414
V
-1,0
BOT
0,13.7071666666667
V
0,1.01661682128906
V
-1,0
BOT
0,13.7138333333333
V
0,1.00612640380859
V
-1,0
BOT
0,13.7205
V
0,0.997543334960938
V
-1,0
BOT
0,13.7271666666667
V
0,0.9918212890625
V
-1,0
BOT
0,13.7338333333333
V
0,0.988006591796875
V
-1,0
BOT
0,13.7405
V
0,0.985145568847656
V
-1,0
BOT
0,13.7471666666667
V
0,0.983715057373047
V
-1,0
BOT
0,13.7538333333333
V
0,0.983238220214844
V
-1,0
BOT
0,13.7605
V
0,0.983715057373047
V
-1,0
BOT
0,13.7671666666667
V
0,0.984668731689453
V
-1,0
BOT
0,13.7738333333333
V
0,0.986099243164063
V
-1,0
BOT
0,13.7805
V
0,0.988960266113281
V
-1,0
BOT
0,13.7871666666667
V
0,0.993251800537109
V
-1,0
BOT
0,13.7938333333333
V
0,0.997543334960938
V
-1,0
BOT
0,13.8005
V
0,1.00135803222656
V
-1,0
BOT
0,13.8071666666667
V
0,1.0066032409668
V
-1,0
BOT
0,13.8138333333333
V
0,1.01375579833984
V
-1,0
BOT
0,13.8205
V
0,1.02329254150391
V
-1,0
BOT
0,13.8271666666667
V
0,1.03282928466797
V
-1,0
BOT
0,13.8338333333333
V
0,1.04236602783203
V
-1,0
BOT
0,13.8405
V
0,1.05142593383789
V
-1,0
BOT
0,13.8471666666667
V
0,1.05905532836914
V
-1,0
BOT
0,13.8538333333333
V
0,1.06716156005859
V
-1,0
BOT
0,13.8605
V
0,1.07479095458984
V
-1,0
BOT
0,13.8671666666667
V
0,1.08146667480469
V
-1,0
BOT
0,13.8738333333333
V
0,1.08671188354492
V
-1,0
BOT
0,13.8805
V
0,1.09148025512695
V
-1,0
BOT
0,13.8871666666667
V
0,1.09624862670898
V
-1,0
BOT
0,13.8938333333333
V
0,1.0986328125
V
-1,0
BOT
0,13.9005
V
0,1.0986328125
V
-1,0
BOT
0,13.9071666666667
V
0,1.09720230102539
V
-1,0
BOT
0,13.9138333333333
V
0,1.09529495239258
V
-1,0
BOT
0,13.9205
V
0,1.09243392944336
V
-1,0
BOT
0,13.9271666666667
V
0,1.08814239501953
V
-1,0
BOT
0,13.9338333333333
V
0,1.08242034912109
V
-1,0
BOT
0,13.9405
V
0,1.07574462890625
V
-1,0
BOT
0,13.9471666666667
V
0,1.068115234375
V
-1,0
BOT
0,13.9538333333333
V
0,1.05905532836914
V
-1,0
BOT
0,13.9605
V
0,1.04951858520508
V
-1,0
BOT
0,13.9671666666667
V
0,1.04093551635742
V
-1,0
BOT
0,13.9738333333333
V
0,1.03235244750977
V
-1,0
BOT
0,13.9805
V
0,1.02376937866211
V
-1,0
BOT
0,13.9871666666667
V
0,1.01518630981445
V
-1,0
BOT
0,13.9938333333333
V
0,1.00803375244141
V
-1,0
BOT
0,14.0005
V
0,1.00088119506836
V
-1,0
BOT
0,14.0071666666667
V
0,0.992774963378906
V
-1,0
BOT
0,14.0138333333333
V
0,0.985145568847656
V
-1,0
BOT
0,14.0205
V
0,0.977516174316406
V
-1,0
BOT
0,14.0271666666667
V
0,0.970840454101563
V
-1,0
BOT
0,14.0338333333333
V
0,0.966072082519531
V
-1,0
BOT
0,14.0405
V
0,0.962257385253906
V
-1,0
BOT
0,14.0471666666667
V
0,0.958919525146484
V
-1,0
BOT
0,14.0538333333333
V
0,0.957012176513672
V
-1,0
BOT
0,14.0605
V
0,0.955104827880859
V
-1,0
BOT
0,14.0671666666667
V
0,0.95367431640625
V
-1,0
BOT
0,14.0738333333333
V
0,0.952720642089844
V
-1,0
BOT
0,14.0805
V
0,0.951290130615234
V
-1,0
BOT
0,14.0871666666667
V
0,0.949382781982422
V
-1,0
BOT
0,14.0938333333333
V
0,0.947952270507813
V
-1,0
BOT
0,14.1005
V
0,0.946521759033203
V
-1,0
BOT
0,14.1071666666667
V
0,0.946044921875
V
-1,0
BOT
0,14.1138333333333
V
0,0.947952270507813
V
-1,0
BOT
0,14.1205
V
0,0.952243804931641
V
-1,0
BOT
0,14.1271666666667
V
0,0.958442687988281
V
-1,0
BOT
0,14.1338333333333
V
0,0.966548919677734
V
-1,0
BOT
0,14.1405
V
0,0.975131988525391
V
-1,0
BOT
0,14.1471666666667
V
0,0.984668731689453
V
-1,0
BOT
0,14.1538333333333
V
0,0.995635986328125
V
-1,0
BOT
0,14.1605
V
0,1.00803375244141
V
-1,0
BOT
0,14.1671666666667
V
0,1.02138519287109
V
-1,0
BOT
0,14.1738333333333
V
0,1.0371208190918
V
-1,0
BOT
0,14.1805
V
0,1.05428695678711
V
-1,0
BOT
0,14.1871666666667
V
0,1.07240676879883
V
-1,0
BOT
0,14.1938333333333
V
0,1.09100341796875
V
-1,0
BOT
0,14.2005
V
0,1.10960006713867
V
-1,0
BOT
0,14.2071666666667
V
0,1.129150390625
V
-1,0
BOT
0,14.2138333333333
V
0,1.14965438842773
V
-1,0
BOT
0,14.2205
V
0,1.17063522338867
V
-1,0
BOT
0,14.2271666666667
V
0,1.19352340698242
V
-1,0
BOT
0,14.2338333333333
V
0,1.21736526489258
V
-1,0
BOT
0,14.2405
V
0,1.23977661132812
V
-1,0
BOT
0,14.2471666666667
V
0,1.26028060913086
V
-1,0
BOT
0,14.2538333333333
V
0,1.27983093261719
V
-1,0
BOT
0,14.2605
V
0,1.2969970703125
V
-1,0
BOT
0,14.2671666666667
V
0,1.31034851074219
V
-1,0
BOT
0,14.2738333333333
V
0,1.31893157958984
V
-1,0
BOT
0,14.2805
V
0,1.32369995117187
V
-1,0
BOT
0,14.2871666666667
V
0,1.32417678833008
V
-1,0
BOT
0,14.2938333333333
V
0,1.32083892822266
V
-1,0
BOT
0,14.3005
V
0,1.31320953369141
V
-1,0
BOT
0,14.3071666666667
V
0,1.30224227905273
V
-1,0
BOT
0,14.3138333333333
V
0,1.28889083862305
V
-1,0
BOT
0,14.3205
V
0,1.27363204956055
V
-1,0
BOT
0,14.3271666666667
V
0,1.25503540039062
V
-1,0
BOT
0,14.3338333333333
V
0,1.23357772827148
V
-1,0
BOT
0,14.3405
V
0,1.20973587036133
V
-1,0
BOT
0,14.3471666666667
V
0,1.18446350097656
V
-1,0
BOT
0,14.3538333333333
V
0,1.15728378295898
V
-1,0
BOT
0,14.3605
V
0,1.12819671630859
V
-1,0
BOT
0,14.3671666666667
V
0,1.0986328125
V
-1,0
BOT
0,14.3738333333333
V
0,1.07002258300781
V
-1,0
BOT
0,14.3805
V
0,1.04188919067383
V
-1,0
BOT
0,14.3871666666667
V
0,1.01518630981445
V
-1,0
BOT
0,14.3938333333333
V
0,0.988960266113281
V
-1,0
BOT
0,14.4005
V
0,0.963211059570313
V
-1,0
BOT
0,14.4071666666667
V
0,0.938892364501953
V
-1,0
BOT
0,14.4138333333333
V
0,0.916004180908203
V
-1,0
BOT
0,14.4205
V
0,0.895023345947266
V
-1,0
BOT
0,14.4271666666667
V
0,0.875473022460938
V
-1,0
BOT
0,14.4338333333333
V
0,0.857830047607422
V
-1,0
BOT
0,14.4405
V
0,0.843048095703125
V
-1,0
BOT
0,14.4471666666667
V
0,0.829696655273438
V
-1,0
BOT
0,14.4538333333333
V
0,0.81634521484375
V
-1,0
BOT
0,14.4605
V
0,0.803947448730469
V
-1,0
BOT
0,14.4671666666667
V
0,0.792503356933594
V
-1,0
BOT
0,14.4738333333333
V
0,0.782966613769531
V
-1,0
BOT
0,14.4805
V
0,0.775337219238281
V
-1,0
BOT
0,14.4871666666667
V
0,0.769138336181641
V
-1,0
BOT
0,14.4938333333333
V
0,0.765323638916016
V
-1,0
BOT
0,14.5005
V
0,0.763416290283203
V
-1,0
BOT
0,14.5071666666667
V
0,0.762462615966797
V
-1,0
BOT
0,14.5138333333333
V
0,0.763416290283203
V
-1,0
BOT
0,14.5205
V
0,0.765800476074219
V
-1,0
BOT
0,14.5271666666667
V
0,0.770092010498047
V
-1,0
BOT
0,14.5338333333333
V
0,0.776290893554688
V
-1,0
BOT
0,14.5405
V
0,0.783443450927734
V
-1,0
BOT
0,14.5471666666667
V
0,0.792980194091797
V
-1,0
BOT
0,14.5538333333333
V
0,0.803470611572266
V
-1,0
BOT
0,14.5605
V
0,0.814437866210938
V
-1,0
BOT
0,14.5671666666667
V
0,0.826358795166016
V
-1,0
BOT
0,14.5738333333333
V
0,0.840187072753906
V
-1,0
BOT
0,14.5805
V
0,0.855445861816406
V
-1,0
BOT
0,14.5871666666667
V
0,0.872611999511719
V
-1,0
BOT
0,14.5938333333333
V
0,0.891208648681641
V
-1,0
BOT
0,14.6005
V
0,0.910758972167969
V
-1,0
BOT
0,14.6071666666667
V
0,0.931739807128906
V
-1,0
BOT
0,14.6138333333333
V
0,0.95367431640625
V
-1,0
BOT
0,14.6205
V
0,0.976085662841797
V
-1,0
BOT
0,14.6271666666667
V
0,0.998497009277344
V
-1,0
BOT
0,14.6338333333333
V
0,1.02043151855469
V
-1,0
BOT
0,14.6405
V
0,1.04188919067383
V
-1,0
BOT
0,14.6471666666667
V
0,1.06239318847656
V
-1,0
BOT
0,14.6538333333333
V
0,1.08146667480469
V
-1,0
BOT
0,14.6605
V
0,1.0991096496582
V
-1,0
BOT
0,14.6671666666667
V
0,1.11484527587891
V
-1,0
BOT
0,14.6738333333333
V
0,1.129150390625
V
-1,0
BOT
0,14.6805
V
0,1.14202499389648
V
-1,0
BOT
0,14.6871666666667
V
0,1.15346908569336
V
-1,0
BOT
0,14.6938333333333
V
0,1.16348266601562
V
-1,0
BOT
0,14.7005
V
0,1.17158889770508
V
-1,0
BOT
0,14.7071666666667
V
0,1.17778778076172
V
-1,0
BOT
0,14.7138333333333
V
0,1.18160247802734
V
-1,0
BOT
0,14.7205
V
0,1.18398666381836
V
-1,0
BOT
0,14.7271666666667
V
0,1.18350982666016
V
-1,0
BOT
0,14.7338333333333
V
0,1.18064880371094
V
-1,0
BOT
0,14.7405
V
0,1.1754035949707
V
-1,0
BOT
0,14.7471666666667
V
0,1.16777420043945
V
-1,0
BOT
0,14.7538333333333
V
0,1.15871429443359
V
-1,0
BOT
0,14.7605
V
0,1.14679336547852
V
-1,0
BOT
0,14.7671666666667
V
0,1.13296508789062
V
-1,0
BOT
0,14.7738333333333
V
0,1.11865997314453
V
-1,0
BOT
0,14.7805
V
0,1.10387802124023
V
-1,0
BOT
0,14.7871666666667
V
0,1.08957290649414
V
-1,0
BOT
0,14.7938333333333
V
0,1.07526779174805
V
-1,0
BOT
0,14.8005
V
0,1.06191635131836
V
-1,0
BOT
0,14.8071666666667
V
0,1.04904174804687
V
-1,0
BOT
0,14.8138333333333
V
0,1.03664398193359
V
-1,0
BOT
0,14.8205
V
0,1.02329254150391
V
-1,0
BOT
0,14.8271666666667
V
0,1.00994110107422
V
-1,0
BOT
0,14.8338333333333
V
0,0.996112823486328
V
-1,0
BOT
0,14.8405
V
0,0.982761383056641
V
-1,0
BOT
0,14.8471666666667
V
0,0.970363616943359
V
-1,0
BOT
0,14.8538333333333
V
0,0.957965850830078
V
-1,0
BOT
0,14.8605
V
0,0.946044921875
V
-1,0
BOT
0,14.8671666666667
V
0,0.935077667236328
V
-1,0
BOT
0,14.8738333333333
V
0,0.925064086914063
V
-1,0
BOT
0,14.8805
V
0,0.91552734375
V
-1,0
BOT
0,14.8871666666667
V
0,0.905513763427734
V
-1,0
BOT
0,14.8938333333333
V
0,0.895977020263672
V
-1,0
BOT
0,14.9005
V
0,0.887870788574219
V
-1,0
BOT
0,14.9071666666667
V
0,0.878810882568359
V
-1,0
BOT
0,14.9138333333333
V
0,0.8697509765625
V
-1,0
BOT
0,14.9205
V
0,0.861167907714844
V
-1,0
BOT
0,14.9271666666667
V
0,0.853061676025391
V
-1,0
BOT
0,14.9338333333333
V
0,0.844478607177734
V
-1,0
BOT
0,14.9405
V
0,0.835418701171875
V
-1,0
BOT
0,14.9471666666667
V
0,0.826358795166016
V
-1,0
BOT
0,14.9538333333333
V
0,0.819206237792969
V
-1,0
BOT
0,14.9605
V
0,0.812053680419922
V
-1,0
BOT
0,14.9671666666667
V
0,0.805377960205078
V
-1,0
BOT
0,14.9738333333333
V
0,0.798225402832031
V
-1,0
BOT
0,14.9805
V
0,0.792503356933594
V
-1,0
BOT
0,14.9871666666667
V
0,0.786781311035156
V
-1,0
BOT
0,14.9938333333333
V
0,0.781536102294922
V
-1,0
BOT
0,15.0005
V
0,0.776290893554688
V
-1,0
BOT
0,15.0071666666667
V
0,0.771045684814453
V
-1,0
BOT
0,15.0138333333333
V
0,0.765800476074219
V
-1,0
BOT
0,15.0205
V
0,0.761032104492188
V
-1,0
BOT
0,15.0271666666667
V
0,0.757217407226563
V
-1,0
BOT
0,15.0338333333333
V
0,0.753402709960938
V
-1,0
BOT
0,15.0405
V
0,0.750064849853516
V
-1,0
BOT
0,15.0471666666667
V
0,0.745773315429688
V
-1,0
BOT
0,15.0538333333333
V
0,0.741958618164063
V
-1,0
BOT
0,15.0605
V
0,0.738620758056641
V
-1,0
BOT
0,15.0671666666667
V
0,0.735282897949219
V
-1,0
BOT
0,15.0738333333333
V
0,0.731945037841797
V
-1,0
BOT
0,15.0805
V
0,0.730037689208984
V
-1,0
BOT
0,15.0871666666667
V
0,0.730514526367188
V
-1,0
BOT
0,15.0938333333333
V
0,0.732898712158203
V
-1,0
BOT
0,15.1005
V
0,0.736713409423828
V
-1,0
BOT
0,15.1071666666667
V
0,0.741958618164063
V
-1,0
BOT
0,15.1138333333333
V
0,0.7476806640625
V
-1,0
BOT
0,15.1205
V
0,0.754833221435547
V
-1,0
BOT
0,15.1271666666667
V
0,0.764369964599609
V
-1,0
BOT
0,15.1338333333333
V
0,0.774383544921875
V
-1,0
BOT
0,15.1405
V
0,0.786304473876953
V
-1,0
BOT
0,15.1471666666667
V
0,0.799179077148438
V
-1,0
BOT
0,15.1538333333333
V
0,0.813484191894531
V
-1,0
BOT
0,15.1605
V
0,0.828266143798828
V
-1,0
BOT
0,15.1671666666667
V
0,0.844001770019531
V
-1,0
BOT
0,15.1738333333333
V
0,0.861167907714844
V
-1,0
BOT
0,15.1805
V
0,0.878334045410156
V
-1,0
BOT
0,15.1871666666667
V
0,0.895500183105469
V
-1,0
BOT
0,15.1938333333333
V
0,0.911712646484375
V
-1,0
BOT
0,15.2005
V
0,0.927448272705078
V
-1,0
BOT
0,15.2071666666667
V
0,0.942230224609375
V
-1,0
BOT
0,15.2138333333333
V
0,0.956535339355469
V
-1,0
BOT
0,15.2205
V
0,0.970363616943359
V
-1,0
BOT
0,15.2271666666667
V
0,0.983238220214844
V
-1,0
BOT
0,15.2338333333333
V
0,0.995159149169922
V
-1,0
BOT
0,15.2405
V
0,1.00612640380859
V
-1,0
BOT
0,15.2471666666667
V
0,1.01518630981445
V
-1,0
BOT
0,15.2538333333333
V
0,1.0218620300293
V
-1,0
BOT
0,15.2605
V
0,1.02663040161133
V
-1,0
BOT
0,15.2671666666667
V
0,1.02853775024414
V
-1,0
BOT
0,15.2738333333333
V
0,1.02758407592773
V
-1,0
BOT
0,15.2805
V
0,1.02567672729492
V
-1,0
BOT
0,15.2871666666667
V
0,1.0228157043457
V
-1,0
BOT
0,15.2938333333333
V
0,1.01900100708008
V
-1,0
BOT
0,15.3005
V
0,1.01470947265625
V
-1,0
BOT
0,15.3071666666667
V
0,1.01089477539062
V
-1,0
BOT
0,15.3138333333333
V
0,1.00803375244141
V
-1,0
BOT
0,15.3205
V
0,1.00517272949219
V
-1,0
BOT
0,15.3271666666667
V
0,1.00135803222656
V
-1,0
BOT
0,15.3338333333333
V
0,0.997543334960938
V
-1,0
BOT
0,15.3405
V
0,0.994205474853516
V
-1,0
BOT
0,15.3471666666667
V
0,0.992298126220703
V
-1,0
BOT
0,15.3538333333333
V
0,0.990867614746094
V
-1,0
BOT
0,15.3605
V
0,0.990390777587891
V
-1,0
BOT
0,15.3671666666667
V
0,0.9918212890625
V
-1,0
BOT
0,15.3738333333333
V
0,0.995159149169922
V
-1,0
BOT
0,15.3805
V
0,0.999927520751953
V
-1,0
BOT
0,15.3871666666667
V
0,1.00517272949219
V
-1,0
BOT
0,15.3938333333333
V
0,1.01184844970703
V
-1,0
BOT
0,15.4005
V
0,1.01947784423828
V
-1,0
BOT
0,15.4071666666667
V
0,1.02758407592773
V
-1,0
BOT
0,15.4138333333333
V
0,1.03521347045898
V
-1,0
BOT
0,15.4205
V
0,1.04141235351562
V
-1,0
BOT
0,15.4271666666667
V
0,1.04856491088867
V
-1,0
BOT
0,15.4338333333333
V
0,1.05571746826172
V
-1,0
BOT
0,15.4405
V
0,1.06334686279297
V
-1,0
BOT
0,15.4471666666667
V
0,1.07049942016602
V
-1,0
BOT
0,15.4538333333333
V
0,1.07765197753906
V
-1,0
BOT
0,15.4605
V
0,1.08432769775391
V
-1,0
BOT
0,15.4671666666667
V
0,1.09148025512695
V
-1,0
BOT
0,15.4738333333333
V
0,1.0991096496582
V
-1,0
BOT
0,15.4805
V
0,1.11007690429687
V
-1,0
BOT
0,15.4871666666667
V
0,1.12628936767578
V
-1,0
BOT
0,15.4938333333333
V
0,1.14870071411133
V
-1,0
BOT
0,15.5005
V
0,1.17921829223633
V
-1,0
BOT
0,15.5071666666667
V
0,1.21831893920898
V
-1,0
BOT
0,15.5138333333333
V
0,1.26838684082031
V
-1,0
BOT
0,15.5205
V
0,1.32894515991211
V
-1,0
BOT
0,15.5271666666667
V
0,1.40142440795898
V
-1,0
BOT
0,15.5338333333333
V
0,1.48868560791016
V
-1,0
BOT
0,15.5405
V
0,1.59168243408203
V
-1,0
BOT
0,15.5471666666667
V
0,1.71232223510742
V
-1,0
BOT
0,15.5538333333333
V
0,1.85203552246094
V
-1,0
BOT
0,15.5605
V
0,2.01272964477539
V
-1,0
BOT
0,15.5671666666667
V
0,2.19488143920898
V
-1,0
BOT
0,15.5738333333333
V
0,2.39753723144531
V
-1,0
BOT
0,15.5805
V
0,2.62069702148437
V
-1,0
BOT
0,15.5871666666667
V
0,2.86293029785156
V
-1,0
BOT
0,15.5938333333333
V
0,3.12042236328125
V
-1,0
BOT
0,15.6005
V
0,3.39078903198242
V
-1,0
BOT
0,15.6071666666667
V
0,3.67069244384766
V
-1,0
BOT
0,15.6138333333333
V
0,3.95727157592773
V
-1,0
BOT
0,15.6205
V
0,4.24623489379883
V
-1,0
BOT
0,15.6271666666667
V
0,4.5318603515625
V
-1,0
BOT
0,15.6338333333333
V
0,4.80937957763672
V
-1,0
BOT
0,15.6405
V
0,5.07402420043945
V
-1,0
BOT
0,15.6471666666667
V
0,5.32007217407227
V
-1,0
BOT
0,15.6538333333333
V
0,5.54227828979492
V
-1,0
BOT
0,15.6605
V
0,5.73587417602539
V
-1,0
BOT
0,15.6671666666667
V
0,5.89609146118164
V
-1,0
BOT
0,15.6738333333333
V
0,6.02054595947266
V
-1,0
BOT
0,15.6805
V
0,6.10637664794922
V
-1,0
BOT
0,15.6871666666667
V
0,6.15167617797852
V
-1,0
BOT
0,15.6938333333333
V
0,6.15549087524414
V
-1,0
BOT
0,15.7005
V
0,6.1187744140625
V
-1,0
BOT
0,15.7071666666667
V
0,6.04343414306641
V
-1,0
BOT
0,15.7138333333333
V
0,5.93090057373047
V
-1,0
BOT
0,15.7205
V
0,5.7835578918457
V
-1,0
BOT
0,15.7271666666667
V
0,5.60665130615234
V
-1,0
BOT
0,15.7338333333333
V
0,5.40494918823242
V
-1,0
BOT
0,15.7405
V
0,5.18274307250977
V
-1,0
BOT
0,15.7471666666667
V
0,4.94384765625
V
-1,0
BOT
0,15.7538333333333
V
0,4.69350814819336
V
-1,0
BOT
0,15.7605
V
0,4.43792343139648
V
-1,0
BOT
0,15.7671666666667
V
0,4.1813850402832
V
-1,0
BOT
0,15.7738333333333
V
0,3.92580032348633
V
-1,0
BOT
0,15.7805
V
0,3.67498397827148
V
-1,0
BOT
0,15.7871666666667
V
0,3.43227386474609
V
-1,0
BOT
0,15.7938333333333
V
0,3.20148468017578
V
-1,0
BOT
0,15.8005
V
0,2.98261642456055
V
-1,0
BOT
0,15.8071666666667
V
0,2.777099609375
V
-1,0
BOT
0,15.8138333333333
V
0,2.58588790893555
V
-1,0
BOT
0,15.8205
V
0,2.4104118347168
V
-1,0
BOT
0,15.8271666666667
V
0,2.25019454956055
V
-1,0
BOT
0,15.8338333333333
V
0,2.1052360534668
V
-1,0
BOT
0,15.8405
V
0,1.97505950927734
V
-1,0
BOT
0,15.8471666666667
V
0,1.85871124267578
V
-1,0
BOT
0,15.8538333333333
V
0,1.7552375793457
V
-1,0
BOT
0,15.8605
V
0,1.66511535644531
V
-1,0
BOT
0,15.8671666666667
V
0,1.5873908996582
V
-1,0
BOT
0,15.8738333333333
V
0,1.52015686035156
V
-1,0
BOT
0,15.8805
V
0,1.46293640136719
V
-1,0
BOT
0,15.8871666666667
V
0,1.41477584838867
V
-1,0
BOT
0,15.8938333333333
V
0,1.37472152709961
V
-1,0
BOT
0,15.9005
V
0,1.34038925170898
V
-1,0
BOT
0,15.9071666666667
V
0,1.31130218505859
V
-1,0
BOT
0,15.9138333333333
V
0,1.28746032714844
V
-1,0
BOT
0,15.9205
V
0,1.26886367797852
V
-1,0
BOT
0,15.9271666666667
V
0,1.25360488891602
V
-1,0
BOT
0,15.9338333333333
V
0,1.24168395996094
V
-1,0
BOT
0,15.9405
V
0,1.23167037963867
V
-1,0
BOT
0,15.9471666666667
V
0,1.22356414794922
V
-1,0
BOT
0,15.9538333333333
V
0,1.21736526489258
V
-1,0
BOT
0,15.9605
V
0,1.21164321899414
V
-1,0
BOT
0,15.9671666666667
V
0,1.20639801025391
V
-1,0
BOT
0,15.9738333333333
V
0,1.20115280151367
V
-1,0
BOT
0,15.9805
V
0,1.19590759277344
V
-1,0
BOT
0,15.9871666666667
V
0,1.1897087097168
V
-1,0
BOT
0,15.9938333333333
V
0,1.18255615234375
V
-1,0
BOT
0,16.0005
V
0,1.1744499206543
V
-1,0
BOT
0,16.0071666666667
V
0,1.16491317749023
V
-1,0
BOT
0,16.0138333333333
V
0,1.15394592285156
V
-1,0
BOT
0,16.0205
V
0,1.14154815673828
V
-1,0
BOT
0,16.0271666666667
V
0,1.12819671630859
V
-1,0
BOT
0,16.0338333333333
V
0,1.1138916015625
V
-1,0
BOT
0,16.0405
V
0,1.09958648681641
V
-1,0
BOT
0,16.0471666666667
V
0,1.08528137207031
V
-1,0
BOT
0,16.0538333333333
V
0,1.07097625732422
V
-1,0
BOT
0,16.0605
V
0,1.05714797973633
V
-1,0
BOT
0,16.0671666666667
V
0,1.04331970214844
V
-1,0
BOT
0,16.0738333333333
V
0,1.02901458740234
V
-1,0
BOT
0,16.0805
V
0,1.01470947265625
V
-1,0
BOT
0,16.0871666666667
V
0,1.00040435791016
V
-1,0
BOT
0,16.0938333333333
V
0,0.987052917480469
V
-1,0
BOT
0,16.1005
V
0,0.974655151367188
V
-1,0
BOT
0,16.1071666666667
V
0,0.962734222412109
V
-1,0
BOT
0,16.1138333333333
V
0,0.951290130615234
V
-1,0
BOT
0,16.1205
V
0,0.938892364501953
V
-1,0
BOT
0,16.1271666666667
V
0,0.926494598388672
V
-1,0
BOT
0,16.1338333333333
V
0,0.915050506591797
V
-1,0
BOT
0,16.1405
V
0,0.904083251953125
V
-1,0
BOT
0,16.1471666666667
V
0,0.894069671630859
V
-1,0
BOT
0,16.1538333333333
V
0,0.885486602783203
V
-1,0
BOT
0,16.1605
V
0,0.879287719726563
V
-1,0
BOT
0,16.1671666666667
V
0,0.875473022460938
V
-1,0
BOT
0,16.1738333333333
V
0,0.871658325195313
V
-1,0
BOT
0,16.1805
V
0,0.867366790771484
V
-1,0
BOT
0,16.1871666666667
V
0,0.862598419189453
V
-1,0
BOT
0,16.1938333333333
V
0,0.857353210449219
V
-1,0
BOT
0,16.2005
V
0,0.851154327392578
V
-1,0
BOT
0,16.2071666666667
V
0,0.843048095703125
V
-1,0
BOT
0,16.2138333333333
V
0,0.834465026855469
V
-1,0
BOT
0,16.2205
V
0,0.826358795166016
V
-1,0
BOT
0,16.2271666666667
V
0,0.819206237792969
V
-1,0
BOT
0,16.2338333333333
V
0,0.813961029052734
V
-1,0
BOT
0,16.2405
V
0,0.8087158203125
V
-1,0
BOT
0,16.2471666666667
V
0,0.803947448730469
V
-1,0
BOT
0,16.2538333333333
V
0,0.798702239990234
V
-1,0
BOT
0,16.2605
V
0,0.794887542724609
V
-1,0
BOT
0,16.2671666666667
V
0,0.792503356933594
V
-1,0
BOT
0,16.2738333333333
V
0,0.790596008300781
V
-1,0
BOT
0,16.2805
V
0,0.789165496826172
V
-1,0
BOT
0,16.2871666666667
V
0,0.789165496826172
V
-1,0
BOT
0,16.2938333333333
V
0,0.790596008300781
V
-1,0
BOT
0,16.3005
V
0,0.792503356933594
V
-1,0
BOT
0,16.3071666666667
V
0,0.794887542724609
V
-1,0
BOT
0,16.3138333333333
V
0,0.797748565673828
V
-1,0
BOT
0,16.3205
V
0,0.802040100097656
V
-1,0
BOT
0,16.3271666666667
V
0,0.809192657470703
V
-1,0
BOT
0,16.3338333333333
V
0,0.819206237792969
V
-1,0
BOT
0,16.3405
V
0,0.830650329589844
V
-1,0
BOT
0,16.3471666666667
V
0,0.843048095703125
V
-1,0
BOT
0,16.3538333333333
V
0,0.856399536132813
V
-1,0
BOT
0,16.3605
V
0,0.871181488037109
V
-1,0
BOT
0,16.3671666666667
V
0,0.885486602783203
V
-1,0
BOT
0,16.3738333333333
V
0,0.899791717529297
V
-1,0
BOT
0,16.3805
V
0,0.916481018066406
V
-1,0
BOT
0,16.3871666666667
V
0,0.934123992919922
V
-1,0
BOT
0,16.3938333333333
V
0,0.951766967773438
V
-1,0
BOT
0,16.4005
V
0,0.968456268310547
V
-1,0
BOT
0,16.4071666666667
V
0,0.984668731689453
V
-1,0
BOT
0,16.4138333333333
V
0,1.00040435791016
V
-1,0
BOT
0,16.4205
V
0,1.01423263549805
V
-1,0
BOT
0,16.4271666666667
V
0,1.02615356445312
V
-1,0
BOT
0,16.4338333333333
V
0,1.03759765625
V
-1,0
BOT
0,16.4405
V
0,1.04856491088867
V
-1,0
BOT
0,16.4471666666667
V
0,1.05810165405273
V
-1,0
BOT
0,16.4538333333333
V
0,1.06620788574219
V
-1,0
BOT
0,16.4605
V
0,1.07240676879883
V
-1,0
BOT
0,16.4671666666667
V
0,1.07669830322266
V
-1,0
BOT
0,16.4738333333333
V
0,1.07860565185547
V
-1,0
BOT
0,16.4805
V
0,1.07860565185547
V
-1,0
BOT
0,16.4871666666667
V
0,1.07669830322266
V
-1,0
BOT
0,16.4938333333333
V
0,1.07336044311523
V
-1,0
BOT
0,16.5005
V
0,1.06906890869141
V
-1,0
BOT
0,16.5071666666667
V
0,1.06382369995117
V
-1,0
BOT
0,16.5138333333333
V
0,1.05810165405273
V
-1,0
BOT
0,16.5205
V
0,1.0523796081543
V
-1,0
BOT
0,16.5271666666667
V
0,1.04713439941406
V
-1,0
BOT
0,16.5338333333333
V
0,1.04141235351562
V
-1,0
BOT
0,16.5405
V
0,1.03521347045898
V
-1,0
BOT
0,16.5471666666667
V
0,1.02996826171875
V
-1,0
BOT
0,16.5538333333333
V
0,1.02519989013672
V
-1,0
BOT
0,16.5605
V
0,1.0223388671875
V
-1,0
BOT
0,16.5671666666667
V
0,1.02090835571289
V
-1,0
BOT
0,16.5738333333333
V
0,1.0218620300293
V
-1,0
BOT
0,16.5805
V
0,1.02424621582031
V
-1,0
BOT
0,16.5871666666667
V
0,1.02949142456055
V
-1,0
BOT
0,16.5938333333333
V
0,1.0371208190918
V
-1,0
BOT
0,16.6005
V
0,1.04618072509766
V
-1,0
BOT
0,16.6071666666667
V
0,1.05619430541992
V
-1,0
BOT
0,16.6138333333333
V
0,1.06716156005859
V
-1,0
BOT
0,16.6205
V
0,1.08003616333008
V
-1,0
BOT
0,16.6271666666667
V
0,1.09529495239258
V
-1,0
BOT
0,16.6338333333333
V
0,1.11293792724609
V
-1,0
BOT
0,16.6405
V
0,1.13487243652344
V
-1,0
BOT
0,16.6471666666667
V
0,1.16109848022461
V
-1,0
BOT
0,16.6538333333333
V
0,1.19447708129883
V
-1,0
BOT
0,16.6605
V
0,1.23453140258789
V
-1,0
BOT
0,16.6671666666667
V
0,1.28364562988281
V
-1,0
BOT
0,16.6738333333333
V
0,1.3432502746582
V
-1,0
BOT
0,16.6805
V
0,1.41429901123047
V
-1,0
BOT
0,16.6871666666667
V
0,1.50012969970703
V
-1,0
BOT
0,16.6938333333333
V
0,1.60360336303711
V
-1,0
BOT
0,16.7005
V
0,1.72948837280273
V
-1,0
BOT
0,16.7071666666667
V
0,1.88112258911133
V
-1,0
BOT
0,16.7138333333333
V
0,2.06232070922852
V
-1,0
BOT
0,16.7205
V
0,2.27642059326172
V
-1,0
BOT
0,16.7271666666667
V
0,2.52866744995117
V
-1,0
BOT
0,16.7338333333333
V
0,2.8228759765625
V
-1,0
BOT
0,16.7405
V
0,3.16286087036133
V
-1,0
BOT
0,16.7471666666667
V
0,3.55100631713867
V
-1,0
BOT
0,16.7538333333333
V
0,3.99017333984375
V
-1,0
BOT
0,16.7605
V
0,4.48369979858398
V
-1,0
BOT
0,16.7671666666667
V
0,5.03301620483398
V
-1,0
BOT
0,16.7738333333333
V
0,5.63764572143555
V
-1,0
BOT
0,16.7805
V
0,6.29425048828125
V
-1,0
BOT
0,16.7871666666667
V
0,7.00044631958008
V
-1,0
BOT
0,16.7938333333333
V
0,7.75051116943359
V
-1,0
BOT
0,16.8005
V
0,8.53776931762695
V
-1,0
BOT
0,16.8071666666667
V
0,9.35268402099609
V
-1,0
BOT
0,16.8138333333333
V
0,10.1833343505859
V
-1,0
BOT
0,16.8205
V
0,11.0211372375488
V
-1,0
BOT
0,16.8271666666667
V
0,11.8513107299805
V
-1,0
BOT
0,16.8338333333333
V
0,12.6595497131348
V
-1,0
BOT
0,16.8405
V
0,13.4315490722656
V
-1,0
BOT
0,16.8471666666667
V
0,14.1534805297852
V
-1,0
BOT
0,16.8538333333333
V
0,14.8119926452637
V
-1,0
BOT
0,16.8605
V
0,15.3946876525879
V
-1,0
BOT
0,16.8671666666667
V
0,15.8901214599609
V
-1,0
BOT
0,16.8738333333333
V
0,16.2897109985352
V
-1,0
BOT
0,16.8805
V
0,16.5858268737793
V
-1,0
BOT
0,16.8871666666667
V
0,16.7732238769531
V
-1,0
BOT
0,16.8938333333333
V
0,16.848087310791
V
-1,0
BOT
0,16.9005
V
0,16.8113708496094
V
-1,0
BOT
0,16.9071666666667
V
0,16.6640281677246
V
-1,0
BOT
0,16.9138333333333
V
0,16.411304473877
V
-1,0
BOT
0,16.9205
V
0,16.0603523254395
V
-1,0
BOT
0,16.9271666666667
V
0,15.6211853027344
V
-1,0
BOT
0,16.9338333333333
V
0,15.103816986084
V
-1,0
BOT
0,16.9405
V
0,14.5187377929687
V
-1,0
BOT
0,16.9471666666667
V
0,13.8778686523437
V
-1,0
BOT
0,16.9538333333333
V
0,13.1945610046387
V
-1,0
BOT
0,16.9605
V
0,12.4807357788086
V
-1,0
BOT
0,16.9671666666667
V
0,11.7497444152832
V
-1,0
BOT
0,16.9738333333333
V
0,11.012077331543
V
-1,0
BOT
0,16.9805
V
0,10.2782249450684
V
-1,0
BOT
0,16.9871666666667
V
0,9.55772399902344
V
-1,0
BOT
0,16.9938333333333
V
0,8.85820388793945
V
-1,0
BOT
0,17.0005
V
0,8.18538665771484
V
-1,0
BOT
0,17.0071666666667
V
0,7.54356384277344
V
-1,0
BOT
0,17.0138333333333
V
0,6.93607330322266
V
-1,0
BOT
0,17.0205
V
0,6.36577606201172
V
-1,0
BOT
0,17.0271666666667
V
0,5.83505630493164
V
-1,0
BOT
0,17.0338333333333
V
0,5.34486770629883
V
-1,0
BOT
0,17.0405
V
0,4.89330291748047
V
-1,0
BOT
0,17.0471666666667
V
0,4.47940826416016
V
-1,0
BOT
0,17.0538333333333
V
0,4.10223007202148
V
-1,0
BOT
0,17.0605
V
0,3.76081466674805
V
-1,0
BOT
0,17.0671666666667
V
0,3.45325469970703
V
-1,0
BOT
0,17.0738333333333
V
0,3.17621231079102
V
-1,0
BOT
0,17.0805
V
0,2.92873382568359
V
-1,0
BOT
0,17.0871666666667
V
0,2.70938873291016
V
-1,0
BOT
0,17.0938333333333
V
0,2.51436233520508
V
-1,0
BOT
0,17.1005
V
0,2.34127044677734
V
-1,0
BOT
0,17.1071666666667
V
0,2.18915939331055
V
-1,0
BOT
0,17.1138333333333
V
0,2.05516815185547
V
-1,0
BOT
0,17.1205
V
0,1.9383430480957
V
-1,0
BOT
0,17.1271666666667
V
0,1.83677673339844
V
-1,0
BOT
0,17.1338333333333
V
0,1.74999237060547
V
-1,0
BOT
0,17.1405
V
0,1.67512893676758
V
-1,0
BOT
0,17.1471666666667
V
0,1.61170959472656
V
-1,0
BOT
0,17.1538333333333
V
0,1.55878067016602
V
-1,0
BOT
0,17.1605
V
0,1.51538848876953
V
-1,0
BOT
0,17.1671666666667
V
0,1.4801025390625
V
-1,0
BOT
0,17.1738333333333
V
0,1.45149230957031
V
-1,0
BOT
0,17.1805
V
0,1.43003463745117
V
-1,0
BOT
0,17.1871666666667
V
0,1.41382217407227
V
-1,0
BOT
0,17.1938333333333
V
0,1.40142440795898
V
-1,0
BOT
0,17.2005
V
0,1.39188766479492
V
-1,0
BOT
0,17.2071666666667
V
0,1.38521194458008
V
-1,0
BOT
0,17.2138333333333
V
0,1.38092041015625
V
-1,0
BOT
0,17.2205
V
0,1.37948989868164
V
-1,0
BOT
0,17.2271666666667
V
0,1.38044357299805
V
-1,0
BOT
0,17.2338333333333
V
0,1.38378143310547
V
-1,0
BOT
0,17.2405
V
0,1.3880729675293
V
-1,0
BOT
0,17.2471666666667
V
0,1.39236450195312
V
-1,0
BOT
0,17.2538333333333
V
0,1.39665603637695
V
-1,0
BOT
0,17.2605
V
0,1.39999389648437
V
-1,0
BOT
0,17.2671666666667
V
0,1.40237808227539
V
-1,0
BOT
0,17.2738333333333
V
0,1.4042854309082
V
-1,0
BOT
0,17.2805
V
0,1.40571594238281
V
-1,0
BOT
0,17.2871666666667
V
0,1.40523910522461
V
-1,0
BOT
0,17.2938333333333
V
0,1.40476226806641
V
-1,0
BOT
0,17.3005
V
0,1.40285491943359
V
-1,0
BOT
0,17.3071666666667
V
0,1.39951705932617
V
-1,0
BOT
0,17.3138333333333
V
0,1.39474868774414
V
-1,0
BOT
0,17.3205
V
0,1.3885498046875
V
-1,0
BOT
0,17.3271666666667
V
0,1.38235092163086
V
-1,0
BOT
0,17.3338333333333
V
0,1.37472152709961
V
-1,0
BOT
0,17.3405
V
0,1.36518478393555
V
-1,0
BOT
0,17.3471666666667
V
0,1.35421752929687
V
-1,0
BOT
0,17.3538333333333
V
0,1.34134292602539
V
-1,0
BOT
0,17.3605
V
0,1.32608413696289
V
-1,0
BOT
0,17.3671666666667
V
0,1.30891799926758
V
-1,0
BOT
0,17.3738333333333
V
0,1.29175186157227
V
-1,0
BOT
0,17.3805
V
0,1.27506256103516
V
-1,0
BOT
0,17.3871666666667
V
0,1.25837326049805
V
-1,0
BOT
0,17.3938333333333
V
0,1.24216079711914
V
-1,0
BOT
0,17.4005
V
0,1.22594833374023
V
-1,0
BOT
0,17.4071666666667
V
0,1.20973587036133
V
-1,0
BOT
0,17.4138333333333
V
0,1.19304656982422
V
-1,0
BOT
0,17.4205
V
0,1.17635726928711
V
-1,0
BOT
0,17.4271666666667
V
0,1.15966796875
V
-1,0
BOT
0,17.4338333333333
V
0,1.1439323425293
V
-1,0
BOT
0,17.4405
V
0,1.1296272277832
V
-1,0
BOT
0,17.4471666666667
V
0,1.11722946166992
V
-1,0
BOT
0,17.4538333333333
V
0,1.10626220703125
V
-1,0
BOT
0,17.4605
V
0,1.09624862670898
V
-1,0
BOT
0,17.4671666666667
V
0,1.08766555786133
V
-1,0
BOT
0,17.4738333333333
V
0,1.07955932617187
V
-1,0
BOT
0,17.4805
V
0,1.07192993164062
V
-1,0
BOT
0,17.4871666666667
V
0,1.06430053710937
V
-1,0
BOT
0,17.4938333333333
V
0,1.05857849121094
V
-1,0
BOT
0,17.5005
V
0,1.05381011962891
V
-1,0
BOT
0,17.5071666666667
V
0,1.04951858520508
V
-1,0
BOT
0,17.5138333333333
V
0,1.04570388793945
V
-1,0
BOT
0,17.5205
V
0,1.04284286499023
V
-1,0
BOT
0,17.5271666666667
V
0,1.04141235351562
V
-1,0
BOT
0,17.5338333333333
V
0,1.03950500488281
V
-1,0
BOT
0,17.5405
V
0,1.03759765625
V
-1,0
BOT
0,17.5471666666667
V
0,1.03664398193359
V
-1,0
BOT
0,17.5538333333333
V
0,1.03569030761719
V
-1,0
BOT
0,17.5605
V
0,1.03616714477539
V
-1,0
BOT
0,17.5671666666667
V
0,1.03569030761719
V
-1,0
BOT
0,17.5738333333333
V
0,1.03473663330078
V
-1,0
BOT
0,17.5805
V
0,1.03425979614258
V
-1,0
BOT
0,17.5871666666667
V
0,1.03378295898437
V
-1,0
BOT
0,17.5938333333333
V
0,1.03425979614258
V
-1,0
BOT
0,17.6005
V
0,1.03473663330078
V
-1,0
BOT
0,17.6071666666667
V
0,1.0371208190918
V
-1,0
BOT
0,17.6138333333333
V
0,1.04093551635742
V
-1,0
BOT
0,17.6205
V
0,1.04665756225586
V
-1,0
BOT
0,17.6271666666667
V
0,1.05428695678711
V
-1,0
BOT
0,17.6338333333333
V
0,1.06573104858398
V
-1,0
BOT
0,17.6405
V
0,1.0828971862793
V
-1,0
BOT
0,17.6471666666667
V
0,1.10483169555664
V
-1,0
BOT
0,17.6538333333333
V
0,1.13344192504883
V
-1,0
BOT
0,17.6605
V
0,1.16968154907227
V
-1,0
BOT
0,17.6671666666667
V
0,1.21688842773437
V
-1,0
BOT
0,17.6738333333333
V
0,1.27601623535156
V
-1,0
BOT
0,17.6805
V
0,1.34754180908203
V
-1,0
BOT
0,17.6871666666667
V
0,1.43575668334961
V
-1,0
BOT
0,17.6938333333333
V
0,1.54542922973633
V
-1,0
BOT
0,17.7005
V
0,1.68228149414062
V
-1,0
BOT
0,17.7071666666667
V
0,1.84917449951172
V
-1,0
BOT
0,17.7138333333333
V
0,2.05087661743164
V
-1,0
BOT
0,17.7205
V
0,2.29310989379883
V
-1,0
BOT
0,17.7271666666667
V
0,2.58159637451172
V
-1,0
BOT
0,17.7338333333333
V
0,2.92110443115234
V
-1,0
BOT
0,17.7405
V
0,3.31783294677734
V
-1,0
BOT
0,17.7471666666667
V
0,3.77750396728516
V
-1,0
BOT
0,17.7538333333333
V
0,4.30631637573242
V
-1,0
BOT
0,17.7605
V
0,4.90999221801758
V
-1,0
BOT
0,17.7671666666667
V
0,5.59091567993164
V
-1,0
BOT
0,17.7738333333333
V
0,6.35147094726563
V
-1,0
BOT
0,17.7805
V
0,7.19165802001953
V
-1,0
BOT
0,17.7871666666667
V
0,8.11100006103516
V
-1,0
BOT
0,17.7938333333333
V
0,9.10615921020508
V
-1,0
BOT
0,17.8005
V
0,10.1709365844727
V
-1,0
BOT
0,17.8071666666667
V
0,11.2972259521484
V
-1,0
BOT
0,17.8138333333333
V
0,12.474536895752
V
-1,0
BOT
0,17.8205
V
0,13.6895179748535
V
-1,0
BOT
0,17.8271666666667
V
0,14.9259567260742
V
-1,0
BOT
0,17.8338333333333
V
0,16.1643028259277
V
-1,0
BOT
0,17.8405
V
0,17.3854827880859
V
-1,0
BOT
0,17.8471666666667
V
0,18.5713768005371
V
-1,0
BOT
0,17.8538333333333
V
0,19.7010040283203
V
-1,0
BOT
0,17.8605
V
0,20.7538604736328
V
-1,0
BOT
0,17.8671666666667
V
0,21.7099189758301
V
-1,0
BOT
0,17.8738333333333
V
0,22.5515365600586
V
-1,0
BOT
0,17.8805
V
0,23.2625007629395
V
-1,0
BOT
0,17.8871666666667
V
0,23.8285064697266
V
-1,0
BOT
0,17.8938333333333
V
0,24.2376327514648
V
-1,0
BOT
0,17.9005
V
0,24.482250213623
V
-1,0
BOT
0,17.9071666666667
V
0,24.5599746704102
V
-1,0
BOT
0,17.9138333333333
V
0,24.4717597961426
V
-1,0
BOT
0,17.9205
V
0,24.2228507995605
V
-1,0
BOT
0,17.9271666666667
V
0,23.8199234008789
V
-1,0
BOT
0,17.9338333333333
V
0,23.2744216918945
V
-1,0
BOT
0,17.9405
V
0,22.6001739501953
V
-1,0
BOT
0,17.9471666666667
V
0,21.8114852905273
V
-1,0
BOT
0,17.9538333333333
V
0,20.9255218505859
V
-1,0
BOT
0,17.9605
V
0,19.9599266052246
V
-1,0
BOT
0,17.9671666666667
V
0,18.9337730407715
V
-1,0
BOT
0,17.9738333333333
V
0,17.8666114807129
V
-1,0
BOT
0,17.9805
V
0,16.7756080627441
V
-1,0
BOT
0,17.9871666666667
V
0,15.6760215759277
V
-1,0
BOT
0,17.9938333333333
V
0,14.5840644836426
V
-1,0
BOT
0,18.0005
V
0,13.512134552002
V
-1,0
BOT
0,18.0071666666667
V
0,12.4716758728027
V
-1,0
BOT
0,18.0138333333333
V
0,11.4727020263672
V
-1,0
BOT
0,18.0205
V
0,10.5223655700684
V
-1,0
BOT
0,18.0271666666667
V
0,9.62591171264648
V
-1,0
BOT
0,18.0338333333333
V
0,8.78715515136719
V
-1,0
BOT
0,18.0405
V
0,8.00848007202148
V
-1,0
BOT
0,18.0471666666667
V
0,7.28988647460938
V
-1,0
BOT
0,18.0538333333333
V
0,6.63089752197266
V
-1,0
BOT
0,18.0605
V
0,6.02865219116211
V
-1,0
BOT
0,18.0671666666667
V
0,5.48171997070313
V
-1,0
BOT
0,18.0738333333333
V
0,4.98819351196289
V
-1,0
BOT
0,18.0805
V
0,4.54378128051758
V
-1,0
BOT
0,18.0871666666667
V
0,4.14514541625977
V
-1,0
BOT
0,18.0938333333333
V
0,3.78894805908203
V
-1,0
BOT
0,18.1005
V
0,3.47185134887695
V
-1,0
BOT
0,18.1071666666667
V
0,3.19004058837891
V
-1,0
BOT
0,18.1138333333333
V
0,2.94113159179687
V
-1,0
BOT
0,18.1205
V
0,2.72035598754883
V
-1,0
BOT
0,18.1271666666667
V
0,2.52532958984375
V
-1,0
BOT
0,18.1338333333333
V
0,2.35366821289062
V
-1,0
BOT
0,18.1405
V
0,2.20394134521484
V
-1,0
BOT
0,18.1471666666667
V
0,2.0747184753418
V
-1,0
BOT
0,18.1538333333333
V
0,1.96218490600586
V
-1,0
BOT
0,18.1605
V
0,1.86443328857422
V
-1,0
BOT
0,18.1671666666667
V
0,1.78098678588867
V
-1,0
BOT
0,18.1738333333333
V
0,1.7094612121582
V
-1,0
BOT
0,18.1805
V
0,1.64699554443359
V
-1,0
BOT
0,18.1871666666667
V
0,1.59215927124023
V
-1,0
BOT
0,18.1938333333333
V
0,1.54352188110352
V
-1,0
BOT
0,18.2005
V
0,1.50251388549805
V
-1,0
BOT
0,18.2071666666667
V
0,1.46722793579102
V
-1,0
BOT
0,18.2138333333333
V
0,1.43623352050781
V
-1,0
BOT
0,18.2205
V
0,1.41048431396484
V
-1,0
BOT
0,18.2271666666667
V
0,1.38950347900391
V
-1,0
BOT
0,18.2338333333333
V
0,1.37090682983398
V
-1,0
BOT
0,18.2405
V
0,1.35421752929687
V
-1,0
BOT
0,18.2471666666667
V
0,1.33895874023437
V
-1,0
BOT
0,18.2538333333333
V
0,1.32513046264648
V
-1,0
BOT
0,18.2605
V
0,1.3127326965332
V
-1,0
BOT
0,18.2671666666667
V
0,1.30033493041992
V
-1,0
BOT
0,18.2738333333333
V
0,1.28793716430664
V
-1,0
BOT
0,18.2805
V
0,1.27601623535156
V
-1,0
BOT
0,18.2871666666667
V
0,1.26409530639648
V
-1,0
BOT
0,18.2938333333333
V
0,1.251220703125
V
-1,0
BOT
0,18.3005
V
0,1.23834609985352
V
-1,0
BOT
0,18.3071666666667
V
0,1.22594833374023
V
-1,0
BOT
0,18.3138333333333
V
0,1.21545791625977
V
-1,0
BOT
0,18.3205
V
0,1.2054443359375
V
-1,0
BOT
0,18.3271666666667
V
0,1.19638442993164
V
-1,0
BOT
0,18.3338333333333
V
0,1.18780136108398
V
-1,0
BOT
0,18.3405
V
0,1.18064880371094
V
-1,0
BOT
0,18.3471666666667
V
0,1.17397308349609
V
-1,0
BOT
0,18.3538333333333
V
0,1.16729736328125
V
-1,0
BOT
0,18.3605
V
0,1.16109848022461
V
-1,0
BOT
0,18.3671666666667
V
0,1.15633010864258
V
-1,0
BOT
0,18.3738333333333
V
0,1.15346908569336
V
-1,0
BOT
0,18.3805
V
0,1.15251541137695
V
-1,0
BOT
0,18.3871666666667
V
0,1.15156173706055
V
-1,0
BOT
0,18.3938333333333
V
0,1.15108489990234
V
-1,0
BOT
0,18.4005
V
0,1.15394592285156
V
-1,0
BOT
0,18.4071666666667
V
0,1.15823745727539
V
-1,0
BOT
0,18.4138333333333
V
0,1.16395950317383
V
-1,0
BOT
0,18.4205
V
0,1.17063522338867
V
-1,0
BOT
0,18.4271666666667
V
0,1.17874145507812
V
-1,0
BOT
0,18.4338333333333
V
0,1.1897087097168
V
-1,0
BOT
0,18.4405
V
0,1.20115280151367
V
-1,0
BOT
0,18.4471666666667
V
0,1.21355056762695
V
-1,0
BOT
0,18.4538333333333
V
0,1.22594833374023
V
-1,0
BOT
0,18.4605
V
0,1.24025344848633
V
-1,0
BOT
0,18.4671666666667
V
0,1.25694274902344
V
-1,0
BOT
0,18.4738333333333
V
0,1.27553939819336
V
-1,0
BOT
0,18.4805
V
0,1.29556655883789
V
-1,0
BOT
0,18.4871666666667
V
0,1.31607055664062
V
-1,0
BOT
0,18.4938333333333
V
0,1.33848190307617
V
-1,0
BOT
0,18.5005
V
0,1.36184692382812
V
-1,0
BOT
0,18.5071666666667
V
0,1.38664245605469
V
-1,0
BOT
0,18.5138333333333
V
0,1.41239166259766
V
-1,0
BOT
0,18.5205
V
0,1.44100189208984
V
-1,0
BOT
0,18.5271666666667
V
0,1.47056579589844
V
-1,0
BOT
0,18.5338333333333
V
0,1.50060653686523
V
-1,0
BOT
0,18.5405
V
0,1.53207778930664
V
-1,0
BOT
0,18.5471666666667
V
0,1.56450271606445
V
-1,0
BOT
0,18.5538333333333
V
0,1.60074234008789
V
-1,0
BOT
0,18.5605
V
0,1.64127349853516
V
-1,0
BOT
0,18.5671666666667
V
0,1.68943405151367
V
-1,0
BOT
0,18.5738333333333
V
0,1.74760818481445
V
-1,0
BOT
0,18.5805
V
0,1.81961059570312
V
-1,0
BOT
0,18.5871666666667
V
0,1.90877914428711
V
-1,0
BOT
0,18.5938333333333
V
0,2.01797485351562
V
-1,0
BOT
0,18.6005
V
0,2.15244293212891
V
-1,0
BOT
0,18.6071666666667
V
0,2.3193359375
V
-1,0
BOT
0,18.6138333333333
V
0,2.52676010131836
V
-1,0
BOT
0,18.6205
V
0,2.78186798095703
V
-1,0
BOT
0,18.6271666666667
V
0,3.09371948242187
V
-1,0
BOT
0,18.6338333333333
V
0,3.47328186035156
V
-1,0
BOT
0,18.6405
V
0,3.93438339233398
V
-1,0
BOT
0,18.6471666666667
V
0,4.48846817016602
V
-1,0
BOT
0,18.6538333333333
V
0,5.14793395996094
V
-1,0
BOT
0,18.6605
V
0,5.92756271362305
V
-1,0
BOT
0,18.6671666666667
V
0,6.84070587158203
V
-1,0
BOT
0,18.6738333333333
V
0,7.90166854858398
V
-1,0
BOT
0,18.6805
V
0,9.12094116210938
V
-1,0
BOT
0,18.6871666666667
V
0,10.5075836181641
V
-1,0
BOT
0,18.6938333333333
V
0,12.0706558227539
V
-1,0
BOT
0,18.7005
V
0,13.8154029846191
V
-1,0
BOT
0,18.7071666666667
V
0,15.7427787780762
V
-1,0
BOT
0,18.7138333333333
V
0,17.8484916687012
V
-1,0
BOT
0,18.7205
V
0,20.1239585876465
V
-1,0
BOT
0,18.7271666666667
V
0,22.5553512573242
V
-1,0
BOT
0,18.7338333333333
V
0,25.123119354248
V
-1,0
BOT
0,18.7405
V
0,27.8024673461914
V
-1,0
BOT
0,18.7471666666667
V
0,30.5633544921875
V
-1,0
BOT
0,18.7538333333333
V
0,33.3709716796875
V
-1,0
BOT
0,18.7605
V
0,36.1847877502441
V
-1,0
BOT
0,18.7671666666667
V
0,38.9614105224609
V
-1,0
BOT
0,18.7738333333333
V
0,41.6555404663086
V
-1,0
BOT
0,18.7805
V
0,44.2204475402832
V
-1,0
BOT
0,18.7871666666667
V
0,46.6089248657227
V
-1,0
BOT
0,18.7938333333333
V
0,48.7747192382813
V
-1,0
BOT
0,18.8005
V
0,50.6772994995117
V
-1,0
BOT
0,18.8071666666667
V
0,52.2799491882324
V
-1,0
BOT
0,18.8138333333333
V
0,53.5516738891602
V
-1,0
BOT
0,18.8205
V
0,54.466724395752
V
-1,0
BOT
0,18.8271666666667
V
0,55.0093650817871
V
-1,0
BOT
0,18.8338333333333
V
0,55.1729202270508
V
-1,0
BOT
0,18.8405
V
0,54.9588203430176
V
-1,0
BOT
0,18.8471666666667
V
0,54.3746948242188
V
-1,0
BOT
0,18.8538333333333
V
0,53.4377098083496
V
-1,0
BOT
0,18.8605
V
0,52.1736145019531
V
-1,0
BOT
0,18.8671666666667
V
0,50.6119728088379
V
-1,0
BOT
0,18.8738333333333
V
0,48.7885475158691
V
-1,0
BOT
0,18.8805
V
0,46.7419624328613
V
-1,0
BOT
0,18.8871666666667
V
0,44.5146560668945
V
-1,0
BOT
0,18.8938333333333
V
0,42.1485900878906
V
-1,0
BOT
0,18.9005
V
0,39.6862030029297
V
-1,0
BOT
0,18.9071666666667
V
0,37.1685028076172
V
-1,0
BOT
0,18.9138333333333
V
0,34.635066986084
V
-1,0
BOT
0,18.9205
V
0,32.1197509765625
V
-1,0
BOT
0,18.9271666666667
V
0,29.6530723571777
V
-1,0
BOT
0,18.9338333333333
V
0,27.2622108459473
V
-1,0
BOT
0,18.9405
V
0,24.9671936035156
V
-1,0
BOT
0,18.9471666666667
V
0,22.7856636047363
V
-1,0
BOT
0,18.9538333333333
V
0,20.7314491271973
V
-1,0
BOT
0,18.9605
V
0,18.8117027282715
V
-1,0
BOT
0,18.9671666666667
V
0,17.031192779541
V
-1,0
BOT
0,18.9738333333333
V
0,15.3899192810059
V
-1,0
BOT
0,18.9805
V
0,13.887882232666
V
-1,0
BOT
0,18.9871666666667
V
0,12.5203132629395
V
-1,0
BOT
0,18.9938333333333
V
0,11.2805366516113
V
-1,0
BOT
0,19.0005
V
0,10.1642608642578
V
-1,0
BOT
0,19.0071666666667
V
0,9.16481018066406
V
-1,0
BOT
0,19.0138333333333
V
0,8.27646255493164
V
-1,0
BOT
0,19.0205
V
0,7.49111175537109
V
-1,0
BOT
0,19.0271666666667
V
0,6.80065155029297
V
-1,0
BOT
0,19.0338333333333
V
0,6.19602203369141
V
-1,0
BOT
0,19.0405
V
0,5.66911697387695
V
-1,0
BOT
0,19.0471666666667
V
0,5.21326065063477
V
-1,0
BOT
0,19.0538333333333
V
0,4.82177734375
V
-1,0
BOT
0,19.0605
V
0,4.48894500732422
V
-1,0
BOT
0,19.0671666666667
V
0,4.20951843261719
V
-1,0
BOT
0,19.0738333333333
V
0,3.97920608520508
V
-1,0
BOT
0,19.0805
V
0,3.79514694213867
V
-1,0
BOT
0,19.0871666666667
V
0,3.65257263183594
V
-1,0
BOT
0,19.0938333333333
V
0,3.54719161987305
V
-1,0
BOT
0,19.1005
V
0,3.47471237182617
V
-1,0
BOT
0,19.1071666666667
V
0,3.43132019042969
V
-1,0
BOT
0,19.1138333333333
V
0,3.41272354125977
V
-1,0
BOT
0,19.1205
V
0,3.41463088989258
V
-1,0
BOT
0,19.1271666666667
V
0,3.4337043762207
V
-1,0
BOT
0,19.1338333333333
V
0,3.46708297729492
V
-1,0
BOT
0,19.1405
V
0,3.51095199584961
V
-1,0
BOT
0,19.1471666666667
V
0,3.56149673461914
V
-1,0
BOT
0,19.1538333333333
V
0,3.61728668212891
V
-1,0
BOT
0,19.1605
V
0,3.67641448974609
V
-1,0
BOT
0,19.1671666666667
V
0,3.73554229736328
V
-1,0
BOT
0,19.1738333333333
V
0,3.79371643066406
V
-1,0
BOT
0,19.1805
V
0,3.84855270385742
V
-1,0
BOT
0,19.1871666666667
V
0,3.89909744262695
V
-1,0
BOT
0,19.1938333333333
V
0,3.94344329833984
V
-1,0
BOT
0,19.2005
V
0,3.97968292236328
V
-1,0
BOT
0,19.2071666666667
V
0,4.00829315185547
V
-1,0
BOT
0,19.2138333333333
V
0,4.0283203125
V
-1,0
BOT
0,19.2205
V
0,4.04119491577148
V
-1,0
BOT
0,19.2271666666667
V
0,4.04739379882813
V
-1,0
BOT
0,19.2338333333333
V
0,4.04787063598633
V
-1,0
BOT
0,19.2405
V
0,4.04453277587891
V
-1,0
BOT
0,19.2471666666667
V
0,4.03738021850586
V
-1,0
BOT
0,19.2538333333333
V
0,4.0283203125
V
-1,0
BOT
0,19.2605
V
0,4.01687622070313
V
-1,0
BOT
0,19.2671666666667
V
0,4.00400161743164
V
-1,0
BOT
0,19.2738333333333
V
0,3.99160385131836
V
-1,0
BOT
0,19.2805
V
0,3.9825439453125
V
-1,0
BOT
0,19.2871666666667
V
0,3.97825241088867
V
-1,0
BOT
0,19.2938333333333
V
0,3.98159027099609
V
-1,0
BOT
0,19.3005
V
0,3.99351119995117
V
-1,0
BOT
0,19.3071666666667
V
0,4.01639938354492
V
-1,0
BOT
0,19.3138333333333
V
0,4.05025482177734
V
-1,0
BOT
0,19.3205
V
0,4.09507751464844
V
-1,0
BOT
0,19.3271666666667
V
0,4.1508674621582
V
-1,0
BOT
0,19.3338333333333
V
0,4.21810150146484
V
-1,0
BOT
0,19.3405
V
0,4.29725646972656
V
-1,0
BOT
0,19.3471666666667
V
0,4.38880920410156
V
-1,0
BOT
0,19.3538333333333
V
0,4.49132919311523
V
-1,0
BOT
0,19.3605
V
0,4.60243225097656
V
-1,0
BOT
0,19.3671666666667
V
0,4.71878051757813
V
-1,0
BOT
0,19.3738333333333
V
0,4.83846664428711
V
-1,0
BOT
0,19.3805
V
0,4.95815277099609
V
-1,0
BOT
0,19.3871666666667
V
0,5.07354736328125
V
-1,0
BOT
0,19.3938333333333
V
0,5.18178939819336
V
-1,0
BOT
0,19.4005
V
0,5.28049468994141
V
-1,0
BOT
0,19.4071666666667
V
0,5.36584854125977
V
-1,0
BOT
0,19.4138333333333
V
0,5.43355941772461
V
-1,0
BOT
0,19.4205
V
0,5.48124313354492
V
-1,0
BOT
0,19.4271666666667
V
0,5.50746917724609
V
-1,0
BOT
0,19.4338333333333
V
0,5.51080703735352
V
-1,0
BOT
0,19.4405
V
0,5.48934936523438
V
-1,0
BOT
0,19.4471666666667
V
0,5.44404983520508
V
-1,0
BOT
0,19.4538333333333
V
0,5.37681579589844
V
-1,0
BOT
0,19.4605
V
0,5.29003143310547
V
-1,0
BOT
0,19.4671666666667
V
0,5.18512725830078
V
-1,0
BOT
0,19.4738333333333
V
0,5.06305694580078
V
-1,0
BOT
0,19.4805
V
0,4.9281120300293
V
-1,0
BOT
0,19.4871666666667
V
0,4.78267669677734
V
-1,0
BOT
0,19.4938333333333
V
0,4.63008880615234
V
-1,0
BOT
0,19.5005
V
0,4.47320938110352
V
-1,0
BOT
0,19.5071666666667
V
0,4.31489944458008
V
-1,0
BOT
0,19.5138333333333
V
0,4.15849685668945
V
-1,0
BOT
0,19.5205
V
0,4.00543212890625
V
-1,0
BOT
0,19.5271666666667
V
0,3.85856628417969
V
-1,0
BOT
0,19.5338333333333
V
0,3.71885299682617
V
-1,0
BOT
0,19.5405
V
0,3.58724594116211
V
-1,0
BOT
0,19.5471666666667
V
0,3.46469879150391
V
-1,0
BOT
0,19.5538333333333
V
0,3.35168838500977
V
-1,0
BOT
0,19.5605
V
0,3.2496452331543
V
-1,0
BOT
0,19.5671666666667
V
0,3.15666198730469
V
-1,0
BOT
0,19.5738333333333
V
0,3.07321548461914
V
-1,0
BOT
0,19.5805
V
0,2.99930572509766
V
-1,0
BOT
0,19.5871666666667
V
0,2.93397903442383
V
-1,0
BOT
0,19.5938333333333
V
0,2.87866592407227
V
-1,0
BOT
0,19.6005
V
0,2.83241271972656
V
-1,0
BOT
0,19.6071666666667
V
0,2.79712677001953
V
-1,0
BOT
0,19.6138333333333
V
0,2.77233123779297
V
-1,0
BOT
0,19.6205
V
0,2.75850296020508
V
-1,0
BOT
0,19.6271666666667
V
0,2.75516510009766
V
-1,0
BOT
0,19.6338333333333
V
0,2.7623176574707
V
-1,0
BOT
0,19.6405
V
0,2.78091430664062
V
-1,0
BOT
0,19.6471666666667
V
0,2.81047821044922
V
-1,0
BOT
0,19.6538333333333
V
0,2.85148620605469
V
-1,0
BOT
0,19.6605
V
0,2.90393829345703
V
-1,0
BOT
0,19.6671666666667
V
0,2.96878814697266
V
-1,0
BOT
0,19.6738333333333
V
0,3.04603576660156
V
-1,0
BOT
0,19.6805
V
0,3.13472747802734
V
-1,0
BOT
0,19.6871666666667
V
0,3.2343864440918
V
-1,0
BOT
0,19.6938333333333
V
0,3.34262847900391
V
-1,0
BOT
0,19.7005
V
0,3.45802307128906
V
-1,0
BOT
0,19.7071666666667
V
0,3.57913970947266
V
-1,0
BOT
0,19.7138333333333
V
0,3.70407104492187
V
-1,0
BOT
0,19.7205
V
0,3.82852554321289
V
-1,0
BOT
0,19.7271666666667
V
0,3.94964218139648
V
-1,0
BOT
0,19.7338333333333
V
0,4.06360626220703
V
-1,0
BOT
0,19.7405
V
0,4.16707992553711
V
-1,0
BOT
0,19.7471666666667
V
0,4.2576789855957
V
-1,0
BOT
0,19.7538333333333
V
0,4.33206558227539
V
-1,0
BOT
0,19.7605
V
0,4.38785552978516
V
-1,0
BOT
0,19.7671666666667
V
0,4.42409515380859
V
-1,0
BOT
0,19.7738333333333
V
0,4.4407844543457
V
-1,0
BOT
0,19.7805
V
0,4.43744659423828
V
-1,0
BOT
0,19.7871666666667
V
0,4.41360473632813
V
-1,0
BOT
0,19.7938333333333
V
0,4.36878204345703
V
-1,0
BOT
0,19.8005
V
0,4.30583953857422
V
-1,0
BOT
0,19.8071666666667
V
0,4.22573089599609
V
-1,0
BOT
0,19.8138333333333
V
0,4.13036346435547
V
-1,0
BOT
0,19.8205
V
0,4.02307510375977
V
-1,0
BOT
0,19.8271666666667
V
0,3.90768051147461
V
-1,0
BOT
0,19.8338333333333
V
0,3.78704071044922
V
-1,0
BOT
0,19.8405
V
0,3.66640090942383
V
-1,0
BOT
0,19.8471666666667
V
0,3.54814529418945
V
-1,0
BOT
0,19.8538333333333
V
0,3.4327507019043
V
-1,0
BOT
0,19.8605
V
0,3.32212448120117
V
-1,0
BOT
0,19.8671666666667
V
0,3.21722030639648
V
-1,0
BOT
0,19.8738333333333
V
0,3.11994552612305
V
-1,0
BOT
0,19.8805
V
0,3.03125381469727
V
-1,0
BOT
0,19.8871666666667
V
0,2.95209884643555
V
-1,0
BOT
0,19.8938333333333
V
0,2.88248062133789
V
-1,0
BOT
0,19.9005
V
0,2.8233528137207
V
-1,0
BOT
0,19.9071666666667
V
0,2.77280807495117
V
-1,0
BOT
0,19.9138333333333
V
0,2.73036956787109
V
-1,0
BOT
0,19.9205
V
0,2.69651412963867
V
-1,0
BOT
0,19.9271666666667
V
0,2.67362594604492
V
-1,0
BOT
0,19.9338333333333
V
0,2.66218185424805
V
-1,0
BOT
0,19.9405
V
0,2.66408920288086
V
-1,0
BOT
0,19.9471666666667
V
0,2.68268585205078
V
-1,0
BOT
0,19.9538333333333
V
0,2.72130966186523
V
-1,0
BOT
0,19.9605
V
0,2.78568267822266
V
-1,0
BOT
0,19.9671666666667
V
0,2.88486480712891
V
-1,0
BOT
0,19.9738333333333
V
0,3.03030014038086
V
-1,0
BOT
0,19.9805
V
0,3.23724746704102
V
-1,0
BOT
0,19.9871666666667
V
0,3.52239608764648
V
-1,0
BOT
0,19.9938333333333
V
0,3.90768051147461
V
-1,0
BOT
0,20.0005
V
0,4.41884994506836
V
-1,0
BOT
0,20.0071666666667
V
0,5.08308410644531
V
-1,0
BOT
0,20.0138333333333
V
0,5.93376159667969
V
-1,0
BOT
0,20.0205
V
0,7.00855255126953
V
-1,0
BOT
0,20.0271666666667
V
0,8.3460807800293
V
-1,0
BOT
0,20.0338333333333
V
0,9.98353958129883
V
-1,0
BOT
0,20.0405
V
0,11.9576454162598
V
-1,0
BOT
0,20.0471666666667
V
0,14.2993927001953
V
-1,0
BOT
0,20.0538333333333
V
0,17.0340538024902
V
-1,0
BOT
0,20.0605
V
0,20.1735496520996
V
-1,0
BOT
0,20.0671666666667
V
0,23.7164497375488
V
-1,0
BOT
0,20.0738333333333
V
0,27.6432037353516
V
-1,0
BOT
0,20.0805
V
0,31.9161415100098
V
-1,0
BOT
0,20.0871666666667
V
0,36.4770889282227
V
-1,0
BOT
0,20.0938333333333
V
0,41.2468910217285
V
-1,0
BOT
0,20.1005
V
0,46.1254119873047
V
-1,0
BOT
0,20.1071666666667
V
0,50.9958267211914
V
-1,0
BOT
0,20.1138333333333
V
0,55.7303428649902
V
-1,0
BOT
0,20.1205
V
0,60.1935386657715
V
-1,0
BOT
0,20.1271666666667
V
0,64.2523765563965
V
-1,0
BOT
0,20.1338333333333
V
0,67.7776336669922
V
-1,0
BOT
0,20.1405
V
0,70.6567764282227
V
-1,0
BOT
0,20.1471666666667
V
0,72.7987289428711
V
-1,0
BOT
0,20.1538333333333
V
0,74.1400718688965
V
-1,0
BOT
0,20.1605
V
0,74.64599609375
V
-1,0
BOT
0,20.1671666666667
V
0,74.312686920166
V
-1,0
BOT
0,20.1738333333333
V
0,73.1678009033203
V
-1,0
BOT
0,20.1805
V
0,71.2695121765137
V
-1,0
BOT
0,20.1871666666667
V
0,68.7003135681152
V
-1,0
BOT
0,20.1938333333333
V
0,65.5627250671387
V
-1,0
BOT
0,20.2005
V
0,61.9711875915527
V
-1,0
BOT
0,20.2071666666667
V
0,58.0477714538574
V
-1,0
BOT
0,20.2138333333333
V
0,53.9112091064453
V
-1,0
BOT
0,20.2205
V
0,49.6768951416016
V
-1,0
BOT
0,20.2271666666667
V
0,45.4478263854981
V
-1,0
BOT
0,20.2338333333333
V
0,41.3122177124023
V
-1,0
BOT
0,20.2405
V
0,37.3396873474121
V
-1,0
BOT
0,20.2471666666667
V
0,33.5850715637207
V
-1,0
BOT
0,20.2538333333333
V
0,30.087947845459
V
-1,0
BOT
0,20.2605
V
0,26.8707275390625
V
-1,0
BOT
0,20.2671666666667
V
0,23.9439010620117
V
-1,0
BOT
0,20.2738333333333
V
0,21.3050842285156
V
-1,0
BOT
0,20.2805
V
0,18.9471244812012
V
-1,0
BOT
0,20.2871666666667
V
0,16.852855682373
V
-1,0
BOT
0,20.2938333333333
V
0,15.0041580200195
V
-1,0
BOT
0,20.3005
V
0,13.3781433105469
V
-1,0
BOT
0,20.3071666666667
V
0,11.9543075561523
V
-1,0
BOT
0,20.3138333333333
V
0,10.7111930847168
V
-1,0
BOT
0,20.3205
V
0,9.6287727355957
V
-1,0
BOT
0,20.3271666666667
V
0,8.68797302246094
V
-1,0
BOT
0,20.3338333333333
V
0,7.87067413330078
V
-1,0
BOT
0,20.3405
V
0,7.16114044189453
V
-1,0
BOT
0,20.3471666666667
V
0,6.54411315917969
V
-1,0
BOT
0,20.3538333333333
V
0,6.00862503051758
V
-1,0
BOT
0,20.3605
V
0,5.54370880126953
V
-1,0
BOT
0,20.3671666666667
V
0,5.14078140258789
V
-1,0
BOT
0,20.3738333333333
V
0,4.79316711425781
V
-1,0
BOT
0,20.3805
V
0,4.49323654174805
V
-1,0
BOT
0,20.3871666666667
V
0,4.23336029052734
V
-1,0
BOT
0,20.3938333333333
V
0,4.00829315185547
V
-1,0
BOT
0,20.4005
V
0,3.81278991699219
V
-1,0
BOT
0,20.4071666666667
V
0,3.64208221435547
V
-1,0
BOT
0,20.4138333333333
V
0,3.49283218383789
V
-1,0
BOT
0,20.4205
V
0,3.36265563964844
V
-1,0
BOT
0,20.4271666666667
V
0,3.24916839599609
V
-1,0
BOT
0,20.4338333333333
V
0,3.15093994140625
V
-1,0
BOT
0,20.4405
V
0,3.06510925292969
V
-1,0
BOT
0,20.4471666666667
V
0,2.99072265625
V
-1,0
BOT
0,20.4538333333333
V
0,2.92682647705078
V
-1,0
BOT
0,20.4605
V
0,2.87199020385742
V
-1,0
BOT
0,20.4671666666667
V
0,2.8233528137207
V
-1,0
BOT
0,20.4738333333333
V
0,2.78043746948242
V
-1,0
BOT
0,20.4805
V
0,2.74324417114258
V
-1,0
BOT
0,20.4871666666667
V
0,2.71129608154297
V
-1,0
BOT
0,20.4938333333333
V
0,2.68316268920898
V
-1,0
BOT
0,20.5005
V
0,2.65789031982422
V
-1,0
BOT
0,20.5071666666667
V
0,2.63500213623047
V
-1,0
BOT
0,20.5138333333333
V
0,2.61497497558594
V
-1,0
BOT
0,20.5205
V
0,2.59637832641602
V
-1,0
BOT
0,20.5271666666667
V
0,2.57968902587891
V
-1,0
BOT
0,20.5338333333333
V
0,2.5639533996582
V
-1,0
BOT
0,20.5405
V
0,2.55107879638672
V
-1,0
BOT
0,20.5471666666667
V
0,2.53963470458984
V
-1,0
BOT
0,20.5538333333333
V
0,2.53057479858398
V
-1,0
BOT
0,20.5605
V
0,2.52294540405273
V
-1,0
BOT
0,20.5671666666667
V
0,2.51483917236328
V
-1,0
BOT
0,20.5738333333333
V
0,2.50625610351562
V
-1,0
BOT
0,20.5805
V
0,2.49719619750977
V
-1,0
BOT
0,20.5871666666667
V
0,2.49004364013672
V
-1,0
BOT
0,20.5938333333333
V
0,2.48432159423828
V
-1,0
BOT
0,20.6005
V
0,2.48003005981445
V
-1,0
BOT
0,20.6071666666667
V
0,2.47764587402344
V
-1,0
BOT
0,20.6138333333333
V
0,2.47812271118164
V
-1,0
BOT
0,20.6205
V
0,2.48003005981445
V
-1,0
BOT
0,20.6271666666667
V
0,2.48146057128906
V
-1,0
BOT
0,20.6338333333333
V
0,2.48289108276367
V
-1,0
BOT
0,20.6405
V
0,2.48527526855469
V
-1,0
BOT
0,20.6471666666667
V
0,2.48813629150391
V
-1,0
BOT
0,20.6538333333333
V
0,2.49052047729492
V
-1,0
BOT
0,20.6605
V
0,2.49338150024414
V
-1,0
BOT
0,20.6671666666667
V
0,2.49719619750977
V
-1,0
BOT
0,20.6738333333333
V
0,2.49958038330078
V
-1,0
BOT
0,20.6805
V
0,2.50053405761719
V
-1,0
BOT
0,20.6871666666667
V
0,2.49910354614258
V
-1,0
BOT
0,20.6938333333333
V
0,2.49528884887695
V
-1,0
BOT
0,20.7005
V
0,2.48956680297852
V
-1,0
BOT
0,20.7071666666667
V
0,2.48146057128906
V
-1,0
BOT
0,20.7138333333333
V
0,2.471923828125
V
-1,0
BOT
0,20.7205
V
0,2.46191024780273
V
-1,0
BOT
0,20.7271666666667
V
0,2.45141983032227
V
-1,0
BOT
0,20.7338333333333
V
0,2.43997573852539
V
-1,0
BOT
0,20.7405
V
0,2.42710113525391
V
-1,0
BOT
0,20.7471666666667
V
0,2.41374969482422
V
-1,0
BOT
0,20.7538333333333
V
0,2.40087509155273
V
-1,0
BOT
0,20.7605
V
0,2.38752365112305
V
-1,0
BOT
0,20.7671666666667
V
0,2.37464904785156
V
-1,0
BOT
0,20.7738333333333
V
0,2.36320495605469
V
-1,0
BOT
0,20.7805
V
0,2.35271453857422
V
-1,0
BOT
0,20.7871666666667
V
0,2.34222412109375
V
-1,0
BOT
0,20.7938333333333
V
0,2.33221054077148
V
-1,0
BOT
0,20.8005
V
0,2.32267379760742
V
-1,0
BOT
0,20.8071666666667
V
0,2.31409072875977
V
-1,0
BOT
0,20.8138333333333
V
0,2.30598449707031
V
-1,0
BOT
0,20.8205
V
0,2.29883193969727
V
-1,0
BOT
0,20.8271666666667
V
0,2.29263305664062
V
-1,0
BOT
0,20.8338333333333
V
0,2.28786468505859
V
-1,0
BOT
0,20.8405
V
0,2.28404998779297
V
-1,0
BOT
0,20.8471666666667
V
0,2.28214263916016
V
-1,0
BOT
0,20.8538333333333
V
0,2.28214263916016
V
-1,0
BOT
0,20.8605
V
0,2.28452682495117
V
-1,0
BOT
0,20.8671666666667
V
0,2.29024887084961
V
-1,0
BOT
0,20.8738333333333
V
0,2.29883193969727
V
-1,0
BOT
0,20.8805
V
0,2.30932235717773
V
-1,0
BOT
0,20.8871666666667
V
0,2.32124328613281
V
-1,0
BOT
0,20.8938333333333
V
0,2.3345947265625
V
-1,0
BOT
0,20.9005
V
0,2.34889984130859
V
-1,0
BOT
0,20.9071666666667
V
0,2.3651123046875
V
-1,0
BOT
0,20.9138333333333
V
0,2.38418579101562
V
-1,0
BOT
0,20.9205
V
0,2.40612030029297
V
-1,0
BOT
0,20.9271666666667
V
0,2.42948532104492
V
-1,0
BOT
0,20.9338333333333
V
0,2.45428085327148
V
-1,0
BOT
0,20.9405
V
0,2.47955322265625
V
-1,0
BOT
0,20.9471666666667
V
0,2.50482559204102
V
-1,0
BOT
0,20.9538333333333
V
0,2.52866744995117
V
-1,0
BOT
0,20.9605
V
0,2.54964828491211
V
-1,0
BOT
0,20.9671666666667
V
0,2.56872177124023
V
-1,0
BOT
0,20.9738333333333
V
0,2.58541107177734
V
-1,0
BOT
0,20.9805
V
0,2.59971618652344
V
-1,0
BOT
0,20.9871666666667
V
0,2.61211395263672
V
-1,0
BOT
0,20.9938333333333
V
0,2.62117385864258
V
-1,0
BOT
0,21.0005
V
0,2.62737274169922
V
-1,0
BOT
0,21.0071666666667
V
0,2.63071060180664
V
-1,0
BOT
0,21.0138333333333
V
0,2.63023376464844
V
-1,0
BOT
0,21.0205
V
0,2.62641906738281
V
-1,0
BOT
0,21.0271666666667
V
0,2.61878967285156
V
-1,0
BOT
0,21.0338333333333
V
0,2.60829925537109
V
-1,0
BOT
0,21.0405
V
0,2.59542465209961
V
-1,0
BOT
0,21.0471666666667
V
0,2.57968902587891
V
-1,0
BOT
0,21.0538333333333
V
0,2.56252288818359
V
-1,0
BOT
0,21.0605
V
0,2.54392623901367
V
-1,0
BOT
0,21.0671666666667
V
0,2.52342224121094
V
-1,0
BOT
0,21.0738333333333
V
0,2.5019645690918
V
-1,0
BOT
0,21.0805
V
0,2.47955322265625
V
-1,0
BOT
0,21.0871666666667
V
0,2.45761871337891
V
-1,0
BOT
0,21.0938333333333
V
0,2.43711471557617
V
-1,0
BOT
0,21.1005
V
0,2.41851806640625
V
-1,0
BOT
0,21.1071666666667
V
0,2.40135192871094
V
-1,0
BOT
0,21.1138333333333
V
0,2.38513946533203
V
-1,0
BOT
0,21.1205
V
0,2.36988067626953
V
-1,0
BOT
0,21.1271666666667
V
0,2.35652923583984
V
-1,0
BOT
0,21.1338333333333
V
0,2.34413146972656
V
-1,0
BOT
0,21.1405
V
0,2.33268737792969
V
-1,0
BOT
0,21.1471666666667
V
0,2.32267379760742
V
-1,0
BOT
0,21.1538333333333
V
0,2.31456756591797
V
-1,0
BOT
0,21.1605
V
0,2.30836868286133
V
-1,0
BOT
0,21.1671666666667
V
0,2.30264663696289
V
-1,0
BOT
0,21.1738333333333
V
0,2.29835510253906
V
-1,0
BOT
0,21.1805
V
0,2.29501724243164
V
-1,0
BOT
0,21.1871666666667
V
0,2.29215621948242
V
-1,0
BOT
0,21.1938333333333
V
0,2.28977203369141
V
-1,0
BOT
0,21.2005
V
0,2.28786468505859
V
-1,0
BOT
0,21.2071666666667
V
0,2.28691101074219
V
-1,0
BOT
0,21.2138333333333
V
0,2.28738784790039
V
-1,0
BOT
0,21.2205
V
0,2.2892951965332
V
-1,0
BOT
0,21.2271666666667
V
0,2.29167938232422
V
-1,0
BOT
0,21.2338333333333
V
0,2.29454040527344
V
-1,0
BOT
0,21.2405
V
0,2.29740142822266
V
-1,0
BOT
0,21.2471666666667
V
0,2.30073928833008
V
-1,0
BOT
0,21.2538333333333
V
0,2.30312347412109
V
-1,0
BOT
0,21.2605
V
0,2.3045539855957
V
-1,0
BOT
0,21.2671666666667
V
0,2.30503082275391
V
-1,0
BOT
0,21.2738333333333
V
0,2.30646133422852
V
-1,0
BOT
0,21.2805
V
0,2.30884552001953
V
-1,0
BOT
0,21.2871666666667
V
0,2.31122970581055
V
-1,0
BOT
0,21.2938333333333
V
0,2.31456756591797
V
-1,0
BOT
0,21.3005
V
0,2.31838226318359
V
-1,0
BOT
0,21.3071666666667
V
0,2.32267379760742
V
-1,0
BOT
0,21.3138333333333
V
0,2.32887268066406
V
-1,0
BOT
0,21.3205
V
0,2.33793258666992
V
-1,0
BOT
0,21.3271666666667
V
0,2.349853515625
V
-1,0
BOT
0,21.3338333333333
V
0,2.3646354675293
V
-1,0
BOT
0,21.3405
V
0,2.38227844238281
V
-1,0
BOT
0,21.3471666666667
V
0,2.40182876586914
V
-1,0
BOT
0,21.3538333333333
V
0,2.42233276367187
V
-1,0
BOT
0,21.3605
V
0,2.44283676147461
V
-1,0
BOT
0,21.3671666666667
V
0,2.46334075927734
V
-1,0
BOT
0,21.3738333333333
V
0,2.48241424560547
V
-1,0
BOT
0,21.3805
V
0,2.49910354614258
V
-1,0
BOT
0,21.3871666666667
V
0,2.51388549804687
V
-1,0
BOT
0,21.3938333333333
V
0,2.52676010131836
V
-1,0
BOT
0,21.4005
V
0,2.53629684448242
V
-1,0
BOT
0,21.4071666666667
V
0,2.54201889038086
V
-1,0
BOT
0,21.4138333333333
V
0,2.54440307617187
V
-1,0
BOT
0,21.4205
V
0,2.54440307617187
V
-1,0
BOT
0,21.4271666666667
V
0,2.54201889038086
V
-1,0
BOT
0,21.4338333333333
V
0,2.53677368164062
V
-1,0
BOT
0,21.4405
V
0,2.52866744995117
V
-1,0
BOT
0,21.4471666666667
V
0,2.51960754394531
V
-1,0
BOT
0,21.4538333333333
V
0,2.51007080078125
V
-1,0
BOT
0,21.4605
V
0,2.50005722045898
V
-1,0
BOT
0,21.4671666666667
V
0,2.49052047729492
V
-1,0
BOT
0,21.4738333333333
V
0,2.48098373413086
V
-1,0
BOT
0,21.4805
V
0,2.4724006652832
V
-1,0
BOT
0,21.4871666666667
V
0,2.46524810791016
V
-1,0
BOT
0,21.4938333333333
V
0,2.45904922485352
V
-1,0
BOT
0,21.5005
V
0,2.45428085327148
V
-1,0
BOT
0,21.5071666666667
V
0,2.45094299316406
V
-1,0
BOT
0,21.5138333333333
V
0,2.44903564453125
V
-1,0
BOT
0,21.5205
V
0,2.44808197021484
V
-1,0
BOT
0,21.5271666666667
V
0,2.44808197021484
V
-1,0
BOT
0,21.5338333333333
V
0,2.44903564453125
V
-1,0
BOT
0,21.5405
V
0,2.45237350463867
V
-1,0
BOT
0,21.5471666666667
V
0,2.4571418762207
V
-1,0
BOT
0,21.5538333333333
V
0,2.46286392211914
V
-1,0
BOT
0,21.5605
V
0,2.47001647949219
V
-1,0
BOT
0,21.5671666666667
V
0,2.47859954833984
V
-1,0
BOT
0,21.5738333333333
V
0,2.48908996582031
V
-1,0
BOT
0,21.5805
V
0,2.50005722045898
V
-1,0
BOT
0,21.5871666666667
V
0,2.51293182373047
V
-1,0
BOT
0,21.5938333333333
V
0,2.52723693847656
V
-1,0
BOT
0,21.6005
V
0,2.54440307617187
V
-1,0
BOT
0,21.6071666666667
V
0,2.56490707397461
V
-1,0
BOT
0,21.6138333333333
V
0,2.58970260620117
V
-1,0
BOT
0,21.6205
V
0,2.61926651000977
V
-1,0
BOT
0,21.6271666666667
V
0,2.655029296875
V
-1,0
BOT
0,21.6338333333333
V
0,2.69985198974609
V
-1,0
BOT
0,21.6405
V
0,2.75468826293945
V
-1,0
BOT
0,21.6471666666667
V
0,2.8223991394043
V
-1,0
BOT
0,21.6538333333333
V
0,2.90632247924805
V
-1,0
BOT
0,21.6605
V
0,3.01122665405273
V
-1,0
BOT
0,21.6671666666667
V
0,3.13949584960937
V
-1,0
BOT
0,21.6738333333333
V
0,3.29494476318359
V
-1,0
BOT
0,21.6805
V
0,3.47900390625
V
-1,0
BOT
0,21.6871666666667
V
0,3.69358062744141
V
-1,0
BOT
0,21.6938333333333
V
0,3.93819808959961
V
-1,0
BOT
0,21.7005
V
0,4.20904159545898
V
-1,0
BOT
0,21.7071666666667
V
0,4.5013427734375
V
-1,0
BOT
0,21.7138333333333
V
0,4.80747222900391
V
-1,0
BOT
0,21.7205
V
0,5.11884689331055
V
-1,0
BOT
0,21.7271666666667
V
0,5.42306900024414
V
-1,0
BOT
0,21.7338333333333
V
0,5.7063102722168
V
-1,0
BOT
0,21.7405
V
0,5.95569610595703
V
-1,0
BOT
0,21.7471666666667
V
0,6.15835189819336
V
-1,0
BOT
0,21.7538333333333
V
0,6.30426406860352
V
-1,0
BOT
0,21.7605
V
0,6.38484954833984
V
-1,0
BOT
0,21.7671666666667
V
0,6.39581680297852
V
-1,0
BOT
0,21.7738333333333
V
0,6.33859634399414
V
-1,0
BOT
0,21.7805
V
0,6.21557235717773
V
-1,0
BOT
0,21.7871666666667
V
0,6.03342056274414
V
-1,0
BOT
0,21.7938333333333
V
0,5.80263137817383
V
-1,0
BOT
0,21.8005
V
0,5.53369522094727
V
-1,0
BOT
0,21.8071666666667
V
0,5.23710250854492
V
-1,0
BOT
0,21.8138333333333
V
0,4.92525100708008
V
-1,0
BOT
0,21.8205
V
0,4.61053848266602
V
-1,0
BOT
0,21.8271666666667
V
0,4.3034553527832
V
-1,0
BOT
0,21.8338333333333
V
0,4.01020050048828
V
-1,0
BOT
0,21.8405
V
0,3.73744964599609
V
-1,0
BOT
0,21.8471666666667
V
0,3.48806381225586
V
-1,0
BOT
0,21.8538333333333
V
0,3.265380859375
V
-1,0
BOT
0,21.8605
V
0,3.06892395019531
V
-1,0
BOT
0,21.8671666666667
V
0,2.89821624755859
V
-1,0
BOT
0,21.8738333333333
V
0,2.75135040283203
V
-1,0
BOT
0,21.8805
V
0,2.6249885559082
V
-1,0
BOT
0,21.8871666666667
V
0,2.51960754394531
V
-1,0
BOT
0,21.8938333333333
V
0,2.43091583251953
V
-1,0
BOT
0,21.9005
V
0,2.35605239868164
V
-1,0
BOT
0,21.9071666666667
V
0,2.29215621948242
V
-1,0
BOT
0,21.9138333333333
V
0,2.23731994628906
V
-1,0
BOT
0,21.9205
V
0,2.18915939331055
V
-1,0
BOT
0,21.9271666666667
V
0,2.14481353759766
V
-1,0
BOT
0,21.9338333333333
V
0,2.10380554199219
V
-1,0
BOT
0,21.9405
V
0,2.06565856933594
V
-1,0
BOT
0,21.9471666666667
V
0,2.03037261962891
V
-1,0
BOT
0,21.9538333333333
V
0,1.99699401855469
V
-1,0
BOT
0,21.9605
V
0,1.96647644042969
V
-1,0
BOT
0,21.9671666666667
V
0,1.94072723388672
V
-1,0
BOT
0,21.9738333333333
V
0,1.91831588745117
V
-1,0
BOT
0,21.9805
V
0,1.89924240112305
V
-1,0
BOT
0,21.9871666666667
V
0,1.88350677490234
V
-1,0
BOT
0,21.9938333333333
V
0,1.87253952026367
V
-1,0
BOT
0,22.0005
V
0,1.86777114868164
V
-1,0
BOT
0,22.0071666666667
V
0,1.86967849731445
V
-1,0
BOT
0,22.0138333333333
V
0,1.87826156616211
V
-1,0
BOT
0,22.0205
V
0,1.89352035522461
V
-1,0
BOT
0,22.0271666666667
V
0,1.91831588745117
V
-1,0
BOT
0,22.0338333333333
V
0,1.95217132568359
V
-1,0
BOT
0,22.0405
V
0,1.99365615844727
V
-1,0
BOT
0,22.0471666666667
V
0,2.04372406005859
V
-1,0
BOT
0,22.0538333333333
V
0,2.10142135620117
V
-1,0
BOT
0,22.0605
V
0,2.16484069824219
V
-1,0
BOT
0,22.0671666666667
V
0,2.23207473754883
V
-1,0
BOT
0,22.0738333333333
V
0,2.30073928833008
V
-1,0
BOT
0,22.0805
V
0,2.36892700195312
V
-1,0
BOT
0,22.0871666666667
V
0,2.43473052978516
V
-1,0
BOT
0,22.0938333333333
V
0,2.49481201171875
V
-1,0
BOT
0,22.1005
V
0,2.5477409362793
V
-1,0
BOT
0,22.1071666666667
V
0,2.59304046630859
V
-1,0
BOT
0,22.1138333333333
V
0,2.62880325317383
V
-1,0
BOT
0,22.1205
V
0,2.65359878540039
V
-1,0
BOT
0,22.1271666666667
V
0,2.66742706298828
V
-1,0
BOT
0,22.1338333333333
V
0,2.67171859741211
V
-1,0
BOT
0,22.1405
V
0,2.66647338867187
V
-1,0
BOT
0,22.1471666666667
V
0,2.65121459960937
V
-1,0
BOT
0,22.1538333333333
V
0,2.62880325317383
V
-1,0
BOT
0,22.1605
V
0,2.60114669799805
V
-1,0
BOT
0,22.1671666666667
V
0,2.56872177124023
V
-1,0
BOT
0,22.1738333333333
V
0,2.532958984375
V
-1,0
BOT
0,22.1805
V
0,2.49528884887695
V
-1,0
BOT
0,22.1871666666667
V
0,2.45809555053711
V
-1,0
BOT
0,22.1938333333333
V
0,2.42185592651367
V
-1,0
BOT
0,22.2005
V
0,2.38609313964844
V
-1,0
BOT
0,22.2071666666667
V
0,2.35223770141602
V
-1,0
BOT
0,22.2138333333333
V
0,2.32219696044922
V
-1,0
BOT
0,22.2205
V
0,2.29454040527344
V
-1,0
BOT
0,22.2271666666667
V
0,2.26974487304687
V
-1,0
BOT
0,22.2338333333333
V
0,2.24637985229492
V
-1,0
BOT
0,22.2405
V
0,2.22349166870117
V
-1,0
BOT
0,22.2471666666667
V
0,2.20060348510742
V
-1,0
BOT
0,22.2538333333333
V
0,2.17866897583008
V
-1,0
BOT
0,22.2605
V
0,2.15625762939453
V
-1,0
BOT
0,22.2671666666667
V
0,2.13432312011719
V
-1,0
BOT
0,22.2738333333333
V
0,2.11286544799805
V
-1,0
BOT
0,22.2805
V
0,2.09236145019531
V
-1,0
BOT
0,22.2871666666667
V
0,2.07185745239258
V
-1,0
BOT
0,22.2938333333333
V
0,2.05183029174805
V
-1,0
BOT
0,22.3005
V
0,2.03227996826172
V
-1,0
BOT
0,22.3071666666667
V
0,2.0146369934082
V
-1,0
BOT
0,22.3138333333333
V
0,1.99794769287109
V
-1,0
BOT
0,22.3205
V
0,1.98173522949219
V
-1,0
BOT
0,22.3271666666667
V
0,1.96743011474609
V
-1,0
BOT
0,22.3338333333333
V
0,1.95455551147461
V
-1,0
BOT
0,22.3405
V
0,1.94358825683594
V
-1,0
BOT
0,22.3471666666667
V
0,1.93357467651367
V
-1,0
BOT
0,22.3538333333333
V
0,1.92546844482422
V
-1,0
BOT
0,22.3605
V
0,1.91879272460937
V
-1,0
BOT
0,22.3671666666667
V
0,1.91402435302734
V
-1,0
BOT
0,22.3738333333333
V
0,1.91020965576172
V
-1,0
BOT
0,22.3805
V
0,1.9073486328125
V
-1,0
BOT
0,22.3871666666667
V
0,1.90496444702148
V
-1,0
BOT
0,22.3938333333333
V
0,1.90258026123047
V
-1,0
BOT
0,22.4005
V
0,1.90114974975586
V
-1,0
BOT
0,22.4071666666667
V
0,1.90067291259766
V
-1,0
BOT
0,22.4138333333333
V
0,1.89971923828125
V
-1,0
BOT
0,22.4205
V
0,1.89828872680664
V
-1,0
BOT
0,22.4271666666667
V
0,1.89495086669922
V
-1,0
BOT
0,22.4338333333333
V
0,1.89018249511719
V
-1,0
BOT
0,22.4405
V
0,1.88398361206055
V
-1,0
BOT
0,22.4471666666667
V
0,1.8768310546875
V
-1,0
BOT
0,22.4538333333333
V
0,1.86872482299805
V
-1,0
BOT
0,22.4605
V
0,1.85966491699219
V
-1,0
BOT
0,22.4671666666667
V
0,1.85012817382812
V
-1,0
BOT
0,22.4738333333333
V
0,1.84059143066406
V
-1,0
BOT
0,22.4805
V
0,1.83010101318359
V
-1,0
BOT
0,22.4871666666667
V
0,1.81913375854492
V
-1,0
BOT
0,22.4938333333333
V
0,1.80768966674805
V
-1,0
BOT
0,22.5005
V
0,1.79672241210937
V
-1,0
BOT
0,22.5071666666667
V
0,1.7857551574707
V
-1,0
BOT
0,22.5138333333333
V
0,1.77526473999023
V
-1,0
BOT
0,22.5205
V
0,1.76620483398437
V
-1,0
BOT
0,22.5271666666667
V
0,1.75666809082031
V
-1,0
BOT
0,22.5338333333333
V
0,1.74760818481445
V
-1,0
BOT
0,22.5405
V
0,1.73759460449219
V
-1,0
BOT
0,22.5471666666667
V
0,1.72710418701172
V
-1,0
BOT
0,22.5538333333333
V
0,1.71613693237305
V
-1,0
BOT
0,22.5605
V
0,1.70421600341797
V
-1,0
BOT
0,22.5671666666667
V
0,1.69181823730469
V
-1,0
BOT
0,22.5738333333333
V
0,1.68037414550781
V
-1,0
BOT
0,22.5805
V
0,1.67083740234375
V
-1,0
BOT
0,22.5871666666667
V
0,1.6632080078125
V
-1,0
BOT
0,22.5938333333333
V
0,1.65796279907227
V
-1,0
BOT
0,22.6005
V
0,1.65605545043945
V
-1,0
BOT
0,22.6071666666667
V
0,1.65605545043945
V
-1,0
BOT
0,22.6138333333333
V
0,1.65796279907227
V
-1,0
BOT
0,22.6205
V
0,1.6627311706543
V
-1,0
BOT
0,22.6271666666667
V
0,1.67083740234375
V
-1,0
BOT
0,22.6338333333333
V
0,1.68180465698242
V
-1,0
BOT
0,22.6405
V
0,1.69563293457031
V
-1,0
BOT
0,22.6471666666667
V
0,1.71232223510742
V
-1,0
BOT
0,22.6538333333333
V
0,1.73234939575195
V
-1,0
BOT
0,22.6605
V
0,1.75380706787109
V
-1,0
BOT
0,22.6671666666667
V
0,1.77717208862305
V
-1,0
BOT
0,22.6738333333333
V
0,1.80149078369141
V
-1,0
BOT
0,22.6805
V
0,1.82580947875977
V
-1,0
BOT
0,22.6871666666667
V
0,1.84965133666992
V
-1,0
BOT
0,22.6938333333333
V
0,1.87158584594727
V
-1,0
BOT
0,22.7005
V
0,1.89113616943359
V
-1,0
BOT
0,22.7071666666667
V
0,1.9078254699707
V
-1,0
BOT
0,22.7138333333333
V
0,1.92165374755859
V
-1,0
BOT
0,22.7205
V
0,1.93214416503906
V
-1,0
BOT
0,22.7271666666667
V
0,1.93881988525391
V
-1,0
BOT
0,22.7338333333333
V
0,1.94263458251953
V
-1,0
BOT
0,22.7405
V
0,1.94358825683594
V
-1,0
BOT
0,22.7471666666667
V
0,1.94168090820312
V
-1,0
BOT
0,22.7538333333333
V
0,1.9373893737793
V
-1,0
BOT
0,22.7605
V
0,1.93119049072266
V
-1,0
BOT
0,22.7671666666667
V
0,1.92451477050781
V
-1,0
BOT
0,22.7738333333333
V
0,1.91736221313477
V
-1,0
BOT
0,22.7805
V
0,1.91020965576172
V
-1,0
BOT
0,22.7871666666667
V
0,1.90448760986328
V
-1,0
BOT
0,22.7938333333333
V
0,1.90162658691406
V
-1,0
BOT
0,22.8005
V
0,1.90067291259766
V
-1,0
BOT
0,22.8071666666667
V
0,1.90258026123047
V
-1,0
BOT
0,22.8138333333333
V
0,1.90591812133789
V
-1,0
BOT
0,22.8205
V
0,1.91116333007812
V
-1,0
BOT
0,22.8271666666667
V
0,1.91831588745117
V
-1,0
BOT
0,22.8338333333333
V
0,1.92642211914062
V
-1,0
BOT
0,22.8405
V
0,1.93452835083008
V
-1,0
BOT
0,22.8471666666667
V
0,1.94358825683594
V
-1,0
BOT
0,22.8538333333333
V
0,1.95503234863281
V
-1,0
BOT
0,22.8605
V
0,1.9679069519043
V
-1,0
BOT
0,22.8671666666667
V
0,1.98078155517578
V
-1,0
BOT
0,22.8738333333333
V
0,1.99365615844727
V
-1,0
BOT
0,22.8805
V
0,2.00557708740234
V
-1,0
BOT
0,22.8871666666667
V
0,2.01702117919922
V
-1,0
BOT
0,22.8938333333333
V
0,2.02703475952148
V
-1,0
BOT
0,22.9005
V
0,2.03657150268555
V
-1,0
BOT
0,22.9071666666667
V
0,2.04610824584961
V
-1,0
BOT
0,22.9138333333333
V
0,2.05564498901367
V
-1,0
BOT
0,22.9205
V
0,2.06565856933594
V
-1,0
BOT
0,22.9271666666667
V
0,2.07710266113281
V
-1,0
BOT
0,22.9338333333333
V
0,2.0909309387207
V
-1,0
BOT
0,22.9405
V
0,2.1061897277832
V
-1,0
BOT
0,22.9471666666667
V
0,2.12383270263672
V
-1,0
BOT
0,22.9538333333333
V
0,2.14481353759766
V
-1,0
BOT
0,22.9605
V
0,2.17056274414062
V
-1,0
BOT
0,22.9671666666667
V
0,2.20108032226562
V
-1,0
BOT
0,22.9738333333333
V
0,2.23827362060547
V
-1,0
BOT
0,22.9805
V
0,2.28595733642578
V
-1,0
BOT
0,22.9871666666667
V
0,2.34603881835937
V
-1,0
BOT
0,22.9938333333333
V
0,2.42233276367187
V
-1,0
BOT
0,23.0005
V
0,2.5177001953125
V
-1,0
BOT
0,23.0071666666667
V
0,2.63738632202148
V
-1,0
BOT
0,23.0138333333333
V
0,2.78234481811523
V
-1,0
BOT
0,23.0205
V
0,2.95495986938477
V
-1,0
BOT
0,23.0271666666667
V
0,3.15427780151367
V
-1,0
BOT
0,23.0338333333333
V
0,3.37839126586914
V
-1,0
BOT
0,23.0405
V
0,3.62300872802734
V
-1,0
BOT
0,23.0471666666667
V
0,3.88097763061523
V
-1,0
BOT
0,23.0538333333333
V
0,4.14371490478516
V
-1,0
BOT
0,23.0605
V
0,4.39882278442383
V
-1,0
BOT
0,23.0671666666667
V
0,4.63724136352539
V
-1,0
BOT
0,23.0738333333333
V
0,4.84704971313477
V
-1,0
BOT
0,23.0805
V
0,5.01680374145508
V
-1,0
BOT
0,23.0871666666667
V
0,5.13744354248047
V
-1,0
BOT
0,23.0938333333333
V
0,5.2037239074707
V
-1,0
BOT
0,23.1005
V
0,5.21421432495117
V
-1,0
BOT
0,23.1071666666667
V
0,5.16939163208008
V
-1,0
BOT
0,23.1138333333333
V
0,5.07497787475586
V
-1,0
BOT
0,23.1205
V
0,4.93669509887695
V
-1,0
BOT
0,23.1271666666667
V
0,4.76360321044922
V
-1,0
BOT
0,23.1338333333333
V
0,4.56571578979492
V
-1,0
BOT
0,23.1405
V
0,4.35113906860352
V
-1,0
BOT
0,23.1471666666667
V
0,4.12702560424805
V
-1,0
BOT
0,23.1538333333333
V
0,3.90100479125977
V
-1,0
BOT
0,23.1605
V
0,3.67927551269531
V
-1,0
BOT
0,23.1671666666667
V
0,3.46660614013672
V
-1,0
BOT
0,23.1738333333333
V
0,3.2658576965332
V
-1,0
BOT
0,23.1805
V
0,3.08036804199219
V
-1,0
BOT
0,23.1871666666667
V
0,2.91109085083008
V
-1,0
BOT
0,23.1938333333333
V
0,2.75707244873047
V
-1,0
BOT
0,23.2005
V
0,2.61831283569336
V
-1,0
BOT
0,23.2071666666667
V
0,2.49481201171875
V
-1,0
BOT
0,23.2138333333333
V
0,2.38513946533203
V
-1,0
BOT
0,23.2205
V
0,2.2892951965332
V
-1,0
BOT
0,23.2271666666667
V
0,2.20727920532227
V
-1,0
BOT
0,23.2338333333333
V
0,2.13861465454102
V
-1,0
BOT
0,23.2405
V
0,2.08139419555664
V
-1,0
BOT
0,23.2471666666667
V
0,2.03609466552734
V
-1,0
BOT
0,23.2538333333333
V
0,2.00176239013672
V
-1,0
BOT
0,23.2605
V
0,1.97601318359375
V
-1,0
BOT
0,23.2671666666667
V
0,1.95789337158203
V
-1,0
BOT
0,23.2738333333333
V
0,1.94644927978516
V
-1,0
BOT
0,23.2805
V
0,1.94168090820312
V
-1,0
BOT
0,23.2871666666667
V
0,1.94168090820312
V
-1,0
BOT
0,23.2938333333333
V
0,1.94549560546875
V
-1,0
BOT
0,23.3005
V
0,1.95217132568359
V
-1,0
BOT
0,23.3071666666667
V
0,1.95884704589844
V
-1,0
BOT
0,23.3138333333333
V
0,1.96552276611328
V
-1,0
BOT
0,23.3205
V
0,1.97076797485352
V
-1,0
BOT
0,23.3271666666667
V
0,1.97458267211914
V
-1,0
BOT
0,23.3338333333333
V
0,1.97696685791016
V
-1,0
BOT
0,23.3405
V
0,1.97649002075195
V
-1,0
BOT
0,23.3471666666667
V
0,1.97267532348633
V
-1,0
BOT
0,23.3538333333333
V
0,1.96647644042969
V
-1,0
BOT
0,23.3605
V
0,1.95741653442383
V
-1,0
BOT
0,23.3671666666667
V
0,1.94644927978516
V
-1,0
BOT
0,23.3738333333333
V
0,1.93262100219727
V
-1,0
BOT
0,23.3805
V
0,1.91783905029297
V
-1,0
BOT
0,23.3871666666667
V
0,1.90353393554687
V
-1,0
BOT
0,23.3938333333333
V
0,1.89065933227539
V
-1,0
BOT
0,23.4005
V
0,1.87873840332031
V
-1,0
BOT
0,23.4071666666667
V
0,1.86777114868164
V
-1,0
BOT
0,23.4138333333333
V
0,1.85823440551758
V
-1,0
BOT
0,23.4205
V
0,1.85012817382812
V
-1,0
BOT
0,23.4271666666667
V
0,1.84440612792969
V
-1,0
BOT
0,23.4338333333333
V
0,1.84059143066406
V
-1,0
BOT
0,23.4405
V
0,1.83773040771484
V
-1,0
BOT
0,23.4471666666667
V
0,1.83629989624023
V
-1,0
BOT
0,23.4538333333333
V
0,1.83629989624023
V
-1,0
BOT
0,23.4605
V
0,1.83677673339844
V
-1,0
BOT
0,23.4671666666667
V
0,1.83629989624023
V
-1,0
BOT
0,23.4738333333333
V
0,1.83582305908203
V
-1,0
BOT
0,23.4805
V
0,1.83534622192383
V
-1,0
BOT
0,23.4871666666667
V
0,1.83534622192383
V
-1,0
BOT
0,23.4938333333333
V
0,1.83486938476562
V
-1,0
BOT
0,23.5005
V
0,1.83439254760742
V
-1,0
BOT
0,23.5071666666667
V
0,1.83296203613281
V
-1,0
BOT
0,23.5138333333333
V
0,1.8305778503418
V
-1,0
BOT
0,23.5205
V
0,1.82676315307617
V
-1,0
BOT
0,23.5271666666667
V
0,1.82247161865234
V
-1,0
BOT
0,23.5338333333333
V
0,1.8162727355957
V
-1,0
BOT
0,23.5405
V
0,1.80864334106445
V
-1,0
BOT
0,23.5471666666667
V
0,1.79958343505859
V
-1,0
BOT
0,23.5538333333333
V
0,1.79004669189453
V
-1,0
BOT
0,23.5605
V
0,1.78003311157227
V
-1,0
BOT
0,23.5671666666667
V
0,1.7695426940918
V
-1,0
BOT
0,23.5738333333333
V
0,1.75905227661133
V
-1,0
BOT
0,23.5805
V
0,1.74951553344727
V
-1,0
BOT
0,23.5871666666667
V
0,1.74188613891602
V
-1,0
BOT
0,23.5938333333333
V
0,1.73616409301758
V
-1,0
BOT
0,23.6005
V
0,1.73091888427734
V
-1,0
BOT
0,23.6071666666667
V
0,1.72615051269531
V
-1,0
BOT
0,23.6138333333333
V
0,1.72138214111328
V
-1,0
BOT
0,23.6205
V
0,1.71709060668945
V
-1,0
BOT
0,23.6271666666667
V
0,1.71327590942383
V
-1,0
BOT
0,23.6338333333333
V
0,1.708984375
V
-1,0
BOT
0,23.6405
V
0,1.70469284057617
V
-1,0
BOT
0,23.6471666666667
V
0,1.69992446899414
V
-1,0
BOT
0,23.6538333333333
V
0,1.69610977172852
V
-1,0
BOT
0,23.6605
V
0,1.69229507446289
V
-1,0
BOT
0,23.6671666666667
V
0,1.68800354003906
V
-1,0
BOT
0,23.6738333333333
V
0,1.68275833129883
V
-1,0
BOT
0,23.6805
V
0,1.67655944824219
V
-1,0
BOT
0,23.6871666666667
V
0,1.67036056518555
V
-1,0
BOT
0,23.6938333333333
V
0,1.6636848449707
V
-1,0
BOT
0,23.7005
V
0,1.65700912475586
V
-1,0
BOT
0,23.7071666666667
V
0,1.65128707885742
V
-1,0
BOT
0,23.7138333333333
V
0,1.64651870727539
V
-1,0
BOT
0,23.7205
V
0,1.64270401000977
V
-1,0
BOT
0,23.7271666666667
V
0,1.64127349853516
V
-1,0
BOT
0,23.7338333333333
V
0,1.64222717285156
V
-1,0
BOT
0,23.7405
V
0,1.64508819580078
V
-1,0
BOT
0,23.7471666666667
V
0,1.64985656738281
V
-1,0
BOT
0,23.7538333333333
V
0,1.65700912475586
V
-1,0
BOT
0,23.7605
V
0,1.66797637939453
V
-1,0
BOT
0,23.7671666666667
V
0,1.68275833129883
V
-1,0
BOT
0,23.7738333333333
V
0,1.69944763183594
V
-1,0
BOT
0,23.7805
V
0,1.71899795532227
V
-1,0
BOT
0,23.7871666666667
V
0,1.739501953125
V
-1,0
BOT
0,23.7938333333333
V
0,1.76095962524414
V
-1,0
BOT
0,23.8005
V
0,1.78194046020508
V
-1,0
BOT
0,23.8071666666667
V
0,1.80339813232422
V
-1,0
BOT
0,23.8138333333333
V
0,1.82485580444336
V
-1,0
BOT
0,23.8205
V
0,1.84535980224609
V
-1,0
BOT
0,23.8271666666667
V
0,1.86538696289062
V
-1,0
BOT
0,23.8338333333333
V
0,1.88350677490234
V
-1,0
BOT
0,23.8405
V
0,1.89876556396484
V
-1,0
BOT
0,23.8471666666667
V
0,1.90925598144531
V
-1,0
BOT
0,23.8538333333333
V
0,1.91450119018555
V
-1,0
BOT
0,23.8605
V
0,1.91402435302734
V
-1,0
BOT
0,23.8671666666667
V
0,1.9078254699707
V
-1,0
BOT
0,23.8738333333333
V
0,1.89685821533203
V
-1,0
BOT
0,23.8805
V
0,1.88207626342773
V
-1,0
BOT
0,23.8871666666667
V
0,1.86300277709961
V
-1,0
BOT
0,23.8938333333333
V
0,1.84011459350586
V
-1,0
BOT
0,23.9005
V
0,1.81436538696289
V
-1,0
BOT
0,23.9071666666667
V
0,1.78670883178711
V
-1,0
BOT
0,23.9138333333333
V
0,1.75857543945312
V
-1,0
BOT
0,23.9205
V
0,1.72996520996094
V
-1,0
BOT
0,23.9271666666667
V
0,1.70278549194336
V
-1,0
BOT
0,23.9338333333333
V
0,1.678466796875
V
-1,0
BOT
0,23.9405
V
0,1.65939331054687
V
-1,0
BOT
0,23.9471666666667
V
0,1.64461135864258
V
-1,0
BOT
0,23.9538333333333
V
0,1.63507461547852
V
-1,0
BOT
0,23.9605
V
0,1.63030624389648
V
-1,0
BOT
0,23.9671666666667
V
0,1.63078308105469
V
-1,0
BOT
0,23.9738333333333
V
0,1.63602828979492
V
-1,0
BOT
0,23.9805
V
0,1.64508819580078
V
-1,0
BOT
0,23.9871666666667
V
0,1.65748596191406
V
-1,0
BOT
0,23.9938333333333
V
0,1.67322158813477
V
-1,0
BOT
0,24.0005
V
0,1.69181823730469
V
-1,0
BOT
0,24.0071666666667
V
0,1.71232223510742
V
-1,0
BOT
0,24.0138333333333
V
0,1.73282623291016
V
-1,0
BOT
0,24.0205
V
0,1.75285339355469
V
-1,0
BOT
0,24.0271666666667
V
0,1.77240371704102
V
-1,0
BOT
0,24.0338333333333
V
0,1.79004669189453
V
-1,0
BOT
0,24.0405
V
0,1.80673599243164
V
-1,0
BOT
0,24.0471666666667
V
0,1.82247161865234
V
-1,0
BOT
0,24.0538333333333
V
0,1.83773040771484
V
-1,0
BOT
0,24.0605
V
0,1.85346603393555
V
-1,0
BOT
0,24.0671666666667
V
0,1.87110900878906
V
-1,0
BOT
0,24.0738333333333
V
0,1.89065933227539
V
-1,0
BOT
0,24.0805
V
0,1.91307067871094
V
-1,0
BOT
0,24.0871666666667
V
0,1.93881988525391
V
-1,0
BOT
0,24.0938333333333
V
0,1.9683837890625
V
-1,0
BOT
0,24.1005
V
0,2.00080871582031
V
-1,0
BOT
0,24.1071666666667
V
0,2.03371047973633
V
-1,0
BOT
0,24.1138333333333
V
0,2.06565856933594
V
-1,0
BOT
0,24.1205
V
0,2.09522247314453
V
-1,0
BOT
0,24.1271666666667
V
0,2.12240219116211
V
-1,0
BOT
0,24.1338333333333
V
0,2.14672088623047
V
-1,0
BOT
0,24.1405
V
0,2.1662712097168
V
-1,0
BOT
0,24.1471666666667
V
0,2.18105316162109
V
-1,0
BOT
0,24.1538333333333
V
0,2.18868255615234
V
-1,0
BOT
0,24.1605
V
0,2.19058990478516
V
-1,0
BOT
0,24.1671666666667
V
0,2.18629837036133
V
-1,0
BOT
0,24.1738333333333
V
0,2.17723846435547
V
-1,0
BOT
0,24.1805
V
0,2.16293334960937
V
-1,0
BOT
0,24.1871666666667
V
0,2.14624404907227
V
-1,0
BOT
0,24.1938333333333
V
0,2.12812423706055
V
-1,0
BOT
0,24.2005
V
0,2.11095809936523
V
-1,0
BOT
0,24.2071666666667
V
0,2.09569931030273
V
-1,0
BOT
0,24.2138333333333
V
0,2.08425521850586
V
-1,0
BOT
0,24.2205
V
0,2.07757949829102
V
-1,0
BOT
0,24.2271666666667
V
0,2.07614898681641
V
-1,0
BOT
0,24.2338333333333
V
0,2.08091735839844
V
-1,0
BOT
0,24.2405
V
0,2.0904541015625
V
-1,0
BOT
0,24.2471666666667
V
0,2.105712890625
V
-1,0
BOT
0,24.2538333333333
V
0,2.12430953979492
V
-1,0
BOT
0,24.2605
V
0,2.14529037475586
V
-1,0
BOT
0,24.2671666666667
V
0,2.16865539550781
V
-1,0
BOT
0,24.2738333333333
V
0,2.19154357910156
V
-1,0
BOT
0,24.2805
V
0,2.21157073974609
V
-1,0
BOT
0,24.2871666666667
V
0,2.22682952880859
V
-1,0
BOT
0,24.2938333333333
V
0,2.23636627197266
V
-1,0
BOT
0,24.3005
V
0,2.23875045776367
V
-1,0
BOT
0,24.3071666666667
V
0,2.23207473754883
V
-1,0
BOT
0,24.3138333333333
V
0,2.21538543701172
V
-1,0
BOT
0,24.3205
V
0,2.19058990478516
V
-1,0
BOT
0,24.3271666666667
V
0,2.15721130371094
V
-1,0
BOT
0,24.3338333333333
V
0,2.11477279663086
V
-1,0
BOT
0,24.3405
V
0,2.06518173217773
V
-1,0
BOT
0,24.3471666666667
V
0,2.01129913330078
V
-1,0
BOT
0,24.3538333333333
V
0,1.95503234863281
V
-1,0
BOT
0,24.3605
V
0,1.89828872680664
V
-1,0
BOT
0,24.3671666666667
V
0,1.84202194213867
V
-1,0
BOT
0,24.3738333333333
V
0,1.78813934326172
V
-1,0
BOT
0,24.3805
V
0,1.73807144165039
V
-1,0
BOT
0,24.3871666666667
V
0,1.69277191162109
V
-1,0
BOT
0,24.3938333333333
V
0,1.65319442749023
V
-1,0
BOT
0,24.4005
V
0,1.62124633789062
V
-1,0
BOT
0,24.4071666666667
V
0,1.59549713134766
V
-1,0
BOT
0,24.4138333333333
V
0,1.57785415649414
V
-1,0
BOT
0,24.4205
V
0,1.56784057617187
V
-1,0
BOT
0,24.4271666666667
V
0,1.56641006469727
V
-1,0
BOT
0,24.4338333333333
V
0,1.5721321105957
V
-1,0
BOT
0,24.4405
V
0,1.58596038818359
V
-1,0
BOT
0,24.4471666666667
V
0,1.60646438598633
V
-1,0
BOT
0,24.4538333333333
V
0,1.63364410400391
V
-1,0
BOT
0,24.4605
V
0,1.66702270507812
V
-1,0
BOT
0,24.4671666666667
V
0,1.70516967773437
V
-1,0
BOT
0,24.4738333333333
V
0,1.74570083618164
V
-1,0
BOT
0,24.4805
V
0,1.78718566894531
V
-1,0
BOT
0,24.4871666666667
V
0,1.82867050170898
V
-1,0
BOT
0,24.4938333333333
V
0,1.86967849731445
V
-1,0
BOT
0,24.5005
V
0,1.90830230712891
V
-1,0
BOT
0,24.5071666666667
V
0,1.94358825683594
V
-1,0
BOT
0,24.5138333333333
V
0,1.97458267211914
V
-1,0
BOT
0,24.5205
V
0,2.00033187866211
V
-1,0
BOT
0,24.5271666666667
V
0,2.02131271362305
V
-1,0
BOT
0,24.5338333333333
V
0,2.03704833984375
V
-1,0
BOT
0,24.5405
V
0,2.04706192016602
V
-1,0
BOT
0,24.5471666666667
V
0,2.05183029174805
V
-1,0
BOT
0,24.5538333333333
V
0,2.05087661743164
V
-1,0
BOT
0,24.5605
V
0,2.0451545715332
V
-1,0
BOT
0,24.5671666666667
V
0,2.03466415405273
V
-1,0
BOT
0,24.5738333333333
V
0,2.01940536499023
V
-1,0
BOT
0,24.5805
V
0,1.9989013671875
V
-1,0
BOT
0,24.5871666666667
V
0,1.97267532348633
V
-1,0
BOT
0,24.5938333333333
V
0,1.94501876831055
V
-1,0
BOT
0,24.6005
V
0,1.91640853881836
V
-1,0
BOT
0,24.6071666666667
V
0,1.88684463500977
V
-1,0
BOT
0,24.6138333333333
V
0,1.85680389404297
V
-1,0
BOT
0,24.6205
V
0,1.82628631591797
V
-1,0
BOT
0,24.6271666666667
V
0,1.79672241210937
V
-1,0
BOT
0,24.6338333333333
V
0,1.76620483398437
V
-1,0
BOT
0,24.6405
V
0,1.73330307006836
V
-1,0
BOT
0,24.6471666666667
V
0,1.69849395751953
V
-1,0
BOT
0,24.6538333333333
V
0,1.6632080078125
V
-1,0
BOT
0,24.6605
V
0,1.62792205810547
V
-1,0
BOT
0,24.6671666666667
V
0,1.59311294555664
V
-1,0
BOT
0,24.6738333333333
V
0,1.55973434448242
V
-1,0
BOT
0,24.6805
V
0,1.52778625488281
V
-1,0
BOT
0,24.6871666666667
V
0,1.49774551391602
V
-1,0
BOT
0,24.6938333333333
V
0,1.46913528442383
V
-1,0
BOT
0,24.7005
V
0,1.44243240356445
V
-1,0
BOT
0,24.7071666666667
V
0,1.4195442199707
V
-1,0
BOT
0,24.7138333333333
V
0,1.39951705932617
V
-1,0
BOT
0,24.7205
V
0,1.38282775878906
V
-1,0
BOT
0,24.7271666666667
V
0,1.36852264404297
V
-1,0
BOT
0,24.7338333333333
V
0,1.35707855224609
V
-1,0
BOT
0,24.7405
V
0,1.34897232055664
V
-1,0
BOT
0,24.7471666666667
V
0,1.3422966003418
V
-1,0
BOT
0,24.7538333333333
V
0,1.33752822875977
V
-1,0
BOT
0,24.7605
V
0,1.33562088012695
V
-1,0
BOT
0,24.7671666666667
V
0,1.33609771728516
V
-1,0
BOT
0,24.7738333333333
V
0,1.33800506591797
V
-1,0
BOT
0,24.7805
V
0,1.33943557739258
V
-1,0
BOT
0,24.7871666666667
V
0,1.34038925170898
V
-1,0
BOT
0,24.7938333333333
V
0,1.34086608886719
V
-1,0
BOT
0,24.8005
V
0,1.34086608886719
V
-1,0
BOT
0,24.8071666666667
V
0,1.33895874023437
V
-1,0
BOT
0,24.8138333333333
V
0,1.33371353149414
V
-1,0
BOT
0,24.8205
V
0,1.32656097412109
V
-1,0
BOT
0,24.8271666666667
V
0,1.31750106811523
V
-1,0
BOT
0,24.8338333333333
V
0,1.30653381347656
V
-1,0
BOT
0,24.8405
V
0,1.29222869873047
V
-1,0
BOT
0,24.8471666666667
V
0,1.27506256103516
V
-1,0
BOT
0,24.8538333333333
V
0,1.25694274902344
V
-1,0
BOT
0,24.8605
V
0,1.23834609985352
V
-1,0
BOT
0,24.8671666666667
V
0,1.21879577636719
V
-1,0
BOT
0,24.8738333333333
V
0,1.19972229003906
V
-1,0
BOT
0,24.8805
V
0,1.18160247802734
V
-1,0
BOT
0,24.8871666666667
V
0,1.16348266601562
V
-1,0
BOT
0,24.8938333333333
V
0,1.14631652832031
V
-1,0
BOT
0,24.9005
V
0,1.13058090209961
V
-1,0
BOT
0,24.9071666666667
V
0,1.11579895019531
V
-1,0
BOT
0,24.9138333333333
V
0,1.10244750976562
V
-1,0
BOT
0,24.9205
V
0,1.09100341796875
V
-1,0
BOT
0,24.9271666666667
V
0,1.08146667480469
V
-1,0
BOT
0,24.9338333333333
V
0,1.07431411743164
V
-1,0
BOT
0,24.9405
V
0,1.068115234375
V
-1,0
BOT
0,24.9471666666667
V
0,1.06287002563477
V
-1,0
BOT
0,24.9538333333333
V
0,1.05905532836914
V
-1,0
BOT
0,24.9605
V
0,1.05714797973633
V
-1,0
BOT
0,24.9671666666667
V
0,1.05762481689453
V
-1,0
BOT
0,24.9738333333333
V
0,1.05953216552734
V
-1,0
BOT
0,24.9805
V
0,1.06382369995117
V
-1,0
BOT
0,24.9871666666667
V
0,1.07002258300781
V
-1,0
BOT
0,24.9938333333333
V
0,1.07765197753906
V
-1,0
BOT
0,25.0005
V
0,1.08575820922852
V
-1,0
BOT
0,25.0071666666667
V
0,1.09338760375977
V
-1,0
BOT
0,25.0138333333333
V
0,1.10149383544922
V
-1,0
BOT
0,25.0205
V
0,1.11055374145508
V
-1,0
BOT
0,25.0271666666667
V
0,1.12056732177734
V
-1,0
BOT
0,25.0338333333333
V
0,1.129150390625
V
-1,0
BOT
0,25.0405
V
0,1.13821029663086
V
-1,0
BOT
0,25.0471666666667
V
0,1.14727020263672
V
-1,0
BOT
0,25.0538333333333
V
0,1.15728378295898
V
-1,0
BOT
0,25.0605
V
0,1.16682052612305
V
-1,0
BOT
0,25.0671666666667
V
0,1.1749267578125
V
-1,0
BOT
0,25.0738333333333
V
0,1.18350982666016
V
-1,0
BOT
0,25.0805
V
0,1.19256973266602
V
-1,0
BOT
0,25.0871666666667
V
0,1.20210647583008
V
-1,0
BOT
0,25.0938333333333
V
0,1.21068954467773
V
-1,0
BOT
0,25.1005
V
0,1.21831893920898
V
-1,0
BOT
0,25.1071666666667
V
0,1.22547149658203
V
-1,0
BOT
0,25.1138333333333
V
0,1.23357772827148
V
-1,0
BOT
0,25.1205
V
0,1.24311447143555
V
-1,0
BOT
0,25.1271666666667
V
0,1.25503540039062
V
-1,0
BOT
0,25.1338333333333
V
0,1.26981735229492
V
-1,0
BOT
0,25.1405
V
0,1.28793716430664
V
-1,0
BOT
0,25.1471666666667
V
0,1.31034851074219
V
-1,0
BOT
0,25.1538333333333
V
0,1.33705139160156
V
-1,0
BOT
0,25.1605
V
0,1.36709213256836
V
-1,0
BOT
0,25.1671666666667
V
0,1.40094757080078
V
-1,0
BOT
0,25.1738333333333
V
0,1.43861770629883
V
-1,0
BOT
0,25.1805
V
0,1.4801025390625
V
-1,0
BOT
0,25.1871666666667
V
0,1.52492523193359
V
-1,0
BOT
0,25.1938333333333
V
0,1.57260894775391
V
-1,0
BOT
0,25.2005
V
0,1.62220001220703
V
-1,0
BOT
0,25.2071666666667
V
0,1.67369842529297
V
-1,0
BOT
0,25.2138333333333
V
0,1.72615051269531
V
-1,0
BOT
0,25.2205
V
0,1.77812576293945
V
-1,0
BOT
0,25.2271666666667
V
0,1.82962417602539
V
-1,0
BOT
0,25.2338333333333
V
0,1.88016891479492
V
-1,0
BOT
0,25.2405
V
0,1.92880630493164
V
-1,0
BOT
0,25.2471666666667
V
0,1.97458267211914
V
-1,0
BOT
0,25.2538333333333
V
0,2.01797485351562
V
-1,0
BOT
0,25.2605
V
0,2.0594596862793
V
-1,0
BOT
0,25.2671666666667
V
0,2.09760665893555
V
-1,0
BOT
0,25.2738333333333
V
0,2.13241577148437
V
-1,0
BOT
0,25.2805
V
0,2.16436386108398
V
-1,0
BOT
0,25.2871666666667
V
0,2.19297409057617
V
-1,0
BOT
0,25.2938333333333
V
0,2.21633911132812
V
-1,0
BOT
0,25.3005
V
0,2.23207473754883
V
-1,0
BOT
0,25.3071666666667
V
0,2.24065780639648
V
-1,0
BOT
0,25.3138333333333
V
0,2.24208831787109
V
-1,0
BOT
0,25.3205
V
0,2.23445892333984
V
-1,0
BOT
0,25.3271666666667
V
0,2.21824645996094
V
-1,0
BOT
0,25.3338333333333
V
0,2.19440460205078
V
-1,0
BOT
0,25.3405
V
0,2.16484069824219
V
-1,0
BOT
0,25.3471666666667
V
0,2.13003158569336
V
-1,0
BOT
0,25.3538333333333
V
0,2.08950042724609
V
-1,0
BOT
0,25.3605
V
0,2.0442008972168
V
-1,0
BOT
0,25.3671666666667
V
0,1.99508666992187
V
-1,0
BOT
0,25.3738333333333
V
0,1.94454193115234
V
-1,0
BOT
0,25.3805
V
0,1.89208984375
V
-1,0
BOT
0,25.3871666666667
V
0,1.83916091918945
V
-1,0
BOT
0,25.3938333333333
V
0,1.78766250610352
V
-1,0
BOT
0,25.4005
V
0,1.73759460449219
V
-1,0
BOT
0,25.4071666666667
V
0,1.69038772583008
V
-1,0
BOT
0,25.4138333333333
V
0,1.64699554443359
V
-1,0
BOT
0,25.4205
V
0,1.60789489746094
V
-1,0
BOT
0,25.4271666666667
V
0,1.57451629638672
V
-1,0
BOT
0,25.4338333333333
V
0,1.54542922973633
V
-1,0
BOT
0,25.4405
V
0,1.52063369750977
V
-1,0
BOT
0,25.4471666666667
V
0,1.49917602539062
V
-1,0
BOT
0,25.4538333333333
V
0,1.48153305053711
V
-1,0
BOT
0,25.4605
V
0,1.46675109863281
V
-1,0
BOT
0,25.4671666666667
V
0,1.45435333251953
V
-1,0
BOT
0,25.4738333333333
V
0,1.44481658935547
V
-1,0
BOT
0,25.4805
V
0,1.43814086914062
V
-1,0
BOT
0,25.4871666666667
V
0,1.43289566040039
V
-1,0
BOT
0,25.4938333333333
V
0,1.42860412597656
V
-1,0
BOT
0,25.5005
V
0,1.42431259155273
V
-1,0
BOT
0,25.5071666666667
V
0,1.42097473144531
V
-1,0
BOT
0,25.5138333333333
V
0,1.41668319702148
V
-1,0
BOT
0,25.5205
V
0,1.41191482543945
V
-1,0
BOT
0,25.5271666666667
V
0,1.40666961669922
V
-1,0
BOT
0,25.5338333333333
V
0,1.40094757080078
V
-1,0
BOT
0,25.5405
V
0,1.39379501342773
V
-1,0
BOT
0,25.5471666666667
V
0,1.38616561889648
V
-1,0
BOT
0,25.5538333333333
V
0,1.37901306152344
V
-1,0
BOT
0,25.5605
V
0,1.37424468994141
V
-1,0
BOT
0,25.5671666666667
V
0,1.37042999267578
V
-1,0
BOT
0,25.5738333333333
V
0,1.36613845825195
V
-1,0
BOT
0,25.5805
V
0,1.36137008666992
V
-1,0
BOT
0,25.5871666666667
V
0,1.35612487792969
V
-1,0
BOT
0,25.5938333333333
V
0,1.35087966918945
V
-1,0
BOT
0,25.6005
V
0,1.34468078613281
V
-1,0
BOT
0,25.6071666666667
V
0,1.33848190307617
V
-1,0
BOT
0,25.6138333333333
V
0,1.33275985717773
V
-1,0
BOT
0,25.6205
V
0,1.3275146484375
V
-1,0
BOT
0,25.6271666666667
V
0,1.32226943969727
V
-1,0
BOT
0,25.6338333333333
V
0,1.31702423095703
V
-1,0
BOT
0,25.6405
V
0,1.31034851074219
V
-1,0
BOT
0,25.6471666666667
V
0,1.30367279052734
V
-1,0
BOT
0,25.6538333333333
V
0,1.2969970703125
V
-1,0
BOT
0,25.6605
V
0,1.29222869873047
V
-1,0
BOT
0,25.6671666666667
V
0,1.28793716430664
V
-1,0
BOT
0,25.6738333333333
V
0,1.28364562988281
V
-1,0
BOT
0,25.6805
V
0,1.27935409545898
V
-1,0
BOT
0,25.6871666666667
V
0,1.27649307250977
V
-1,0
BOT
0,25.6938333333333
V
0,1.27458572387695
V
-1,0
BOT
0,25.7005
V
0,1.27267837524414
V
-1,0
BOT
0,25.7071666666667
V
0,1.27220153808594
V
-1,0
BOT
0,25.7138333333333
V
0,1.27267837524414
V
-1,0
BOT
0,25.7205
V
0,1.27506256103516
V
-1,0
BOT
0,25.7271666666667
V
0,1.28030776977539
V
-1,0
BOT
0,25.7338333333333
V
0,1.28793716430664
V
-1,0
BOT
0,25.7405
V
0,1.2969970703125
V
-1,0
BOT
0,25.7471666666667
V
0,1.30748748779297
V
-1,0
BOT
0,25.7538333333333
V
0,1.31940841674805
V
-1,0
BOT
0,25.7605
V
0,1.33275985717773
V
-1,0
BOT
0,25.7671666666667
V
0,1.34706497192383
V
-1,0
BOT
0,25.7738333333333
V
0,1.36184692382812
V
-1,0
BOT
0,25.7805
V
0,1.37710571289062
V
-1,0
BOT
0,25.7871666666667
V
0,1.39236450195312
V
-1,0
BOT
0,25.7938333333333
V
0,1.40714645385742
V
-1,0
BOT
0,25.8005
V
0,1.42002105712891
V
-1,0
BOT
0,25.8071666666667
V
0,1.43146514892578
V
-1,0
BOT
0,25.8138333333333
V
0,1.44052505493164
V
-1,0
BOT
0,25.8205
V
0,1.44863128662109
V
-1,0
BOT
0,25.8271666666667
V
0,1.45483016967773
V
-1,0
BOT
0,25.8338333333333
V
0,1.45912170410156
V
-1,0
BOT
0,25.8405
V
0,1.46198272705078
V
-1,0
BOT
0,25.8471666666667
V
0,1.46245956420898
V
-1,0
BOT
0,25.8538333333333
V
0,1.46007537841797
V
-1,0
BOT
0,25.8605
V
0,1.45483016967773
V
-1,0
BOT
0,25.8671666666667
V
0,1.44672393798828
V
-1,0
BOT
0,25.8738333333333
V
0,1.43718719482422
V
-1,0
BOT
0,25.8805
V
0,1.42669677734375
V
-1,0
BOT
0,25.8871666666667
V
0,1.41525268554687
V
-1,0
BOT
0,25.8938333333333
V
0,1.4033317565918
V
-1,0
BOT
0,25.9005
V
0,1.39093399047852
V
-1,0
BOT
0,25.9071666666667
V
0,1.37758255004883
V
-1,0
BOT
0,25.9138333333333
V
0,1.36280059814453
V
-1,0
BOT
0,25.9205
V
0,1.34801864624023
V
-1,0
BOT
0,25.9271666666667
V
0,1.33275985717773
V
-1,0
BOT
0,25.9338333333333
V
0,1.31654739379883
V
-1,0
BOT
0,25.9405
V
0,1.30033493041992
V
-1,0
BOT
0,25.9471666666667
V
0,1.28269195556641
V
-1,0
BOT
0,25.9538333333333
V
0,1.26409530639648
V
-1,0
BOT
0,25.9605
V
0,1.24549865722656
V
-1,0
BOT
0,25.9671666666667
V
0,1.22642517089844
V
-1,0
BOT
0,25.9738333333333
V
0,1.20735168457031
V
-1,0
BOT
0,25.9805
V
0,1.18827819824219
V
-1,0
BOT
0,25.9871666666667
V
0,1.17015838623047
V
-1,0
BOT
0,25.9938333333333
V
0,1.15251541137695
V
-1,0
BOT
0,26.0005
V
0,1.13439559936523
V
-1,0
BOT
0,26.0071666666667
V
0,1.11579895019531
V
-1,0
BOT
0,26.0138333333333
V
0,1.09624862670898
V
-1,0
BOT
0,26.0205
V
0,1.07717514038086
V
-1,0
BOT
0,26.0271666666667
V
0,1.05857849121094
V
-1,0
BOT
0,26.0338333333333
V
0,1.04093551635742
V
-1,0
BOT
0,26.0405
V
0,1.02567672729492
V
-1,0
BOT
0,26.0471666666667
V
0,1.01280212402344
V
-1,0
BOT
0,26.0538333333333
V
0,1.00135803222656
V
-1,0
BOT
0,26.0605
V
0,0.991344451904297
V
-1,0
BOT
0,26.0671666666667
V
0,0.982761383056641
V
-1,0
BOT
0,26.0738333333333
V
0,0.975131988525391
V
-1,0
BOT
0,26.0805
V
0,0.967979431152344
V
-1,0
BOT
0,26.0871666666667
V
0,0.962257385253906
V
-1,0
BOT
0,26.0938333333333
V
0,0.957965850830078
V
-1,0
BOT
0,26.1005
V
0,0.954151153564453
V
-1,0
BOT
0,26.1071666666667
V
0,0.951290130615234
V
-1,0
BOT
0,26.1138333333333
V
0,0.949382781982422
V
-1,0
BOT
0,26.1205
V
0,0.949859619140625
V
-1,0
BOT
0,26.1271666666667
V
0,0.951290130615234
V
-1,0
BOT
0,26.1338333333333
V
0,0.95367431640625
V
-1,0
BOT
0,26.1405
V
0,0.957965850830078
V
-1,0
BOT
0,26.1471666666667
V
0,0.963211059570313
V
-1,0
BOT
0,26.1538333333333
V
0,0.967502593994141
V
-1,0
BOT
0,26.1605
V
0,0.970363616943359
V
-1,0
BOT
0,26.1671666666667
V
0,0.972747802734375
V
-1,0
BOT
0,26.1738333333333
V
0,0.974178314208984
V
-1,0
BOT
0,26.1805
V
0,0.975131988525391
V
-1,0
BOT
0,26.1871666666667
V
0,0.975608825683594
V
-1,0
BOT
0,26.1938333333333
V
0,0.975608825683594
V
-1,0
BOT
0,26.2005
V
0,0.975131988525391
V
-1,0
BOT
0,26.2071666666667
V
0,0.972270965576172
V
-1,0
BOT
0,26.2138333333333
V
0,0.968456268310547
V
-1,0
BOT
0,26.2205
V
0,0.963687896728516
V
-1,0
BOT
0,26.2271666666667
V
0,0.958442687988281
V
-1,0
BOT
0,26.2338333333333
V
0,0.951290130615234
V
-1,0
BOT
0,26.2405
V
0,0.943183898925781
V
-1,0
BOT
0,26.2471666666667
V
0,0.934600830078125
V
-1,0
BOT
0,26.2538333333333
V
0,0.926494598388672
V
-1,0
BOT
0,26.2605
V
0,0.918388366699219
V
-1,0
BOT
0,26.2671666666667
V
0,0.909805297851563
V
-1,0
BOT
0,26.2738333333333
V
0,0.902175903320313
V
-1,0
BOT
0,26.2805
V
0,0.897407531738281
V
-1,0
BOT
0,26.2871666666667
V
0,0.894069671630859
V
-1,0
BOT
0,26.2938333333333
V
0,0.890731811523438
V
-1,0
BOT
0,26.3005
V
0,0.887870788574219
V
-1,0
BOT
0,26.3071666666667
V
0,0.886440277099609
V
-1,0
BOT
0,26.3138333333333
V
0,0.886440277099609
V
-1,0
BOT
0,26.3205
V
0,0.886440277099609
V
-1,0
BOT
0,26.3271666666667
V
0,0.885963439941406
V
-1,0
BOT
0,26.3338333333333
V
0,0.886440277099609
V
-1,0
BOT
0,26.3405
V
0,0.888824462890625
V
-1,0
BOT
0,26.3471666666667
V
0,0.891685485839844
V
-1,0
BOT
0,26.3538333333333
V
0,0.894546508789063
V
-1,0
BOT
0,26.3605
V
0,0.898361206054688
V
-1,0
BOT
0,26.3671666666667
V
0,0.904083251953125
V
-1,0
BOT
0,26.3738333333333
V
0,0.910758972167969
V
-1,0
BOT
0,26.3805
V
0,0.916957855224609
V
-1,0
BOT
0,26.3871666666667
V
0,0.921249389648438
V
-1,0
BOT
0,26.3938333333333
V
0,0.924587249755859
V
-1,0
BOT
0,26.4005
V
0,0.927448272705078
V
-1,0
BOT
0,26.4071666666667
V
0,0.928401947021484
V
-1,0
BOT
0,26.4138333333333
V
0,0.927925109863281
V
-1,0
BOT
0,26.4205
V
0,0.926971435546875
V
-1,0
BOT
0,26.4271666666667
V
0,0.926494598388672
V
-1,0
BOT
0,26.4338333333333
V
0,0.926017761230469
V
-1,0
BOT
0,26.4405
V
0,0.925064086914063
V
-1,0
BOT
0,26.4471666666667
V
0,0.922203063964844
V
-1,0
BOT
0,26.4538333333333
V
0,0.917434692382813
V
-1,0
BOT
0,26.4605
V
0,0.911235809326172
V
-1,0
BOT
0,26.4671666666667
V
0,0.904083251953125
V
-1,0
BOT
0,26.4738333333333
V
0,0.895977020263672
V
-1,0
BOT
0,26.4805
V
0,0.887870788574219
V
-1,0
BOT
0,26.4871666666667
V
0,0.881195068359375
V
-1,0
BOT
0,26.4938333333333
V
0,0.874996185302734
V
-1,0
BOT
0,26.5005
V
0,0.868797302246094
V
-1,0
BOT
0,26.5071666666667
V
0,0.86212158203125
V
-1,0
BOT
0,26.5138333333333
V
0,0.855445861816406
V
-1,0
BOT
0,26.5205
V
0,0.849246978759766
V
-1,0
BOT
0,26.5271666666667
V
0,0.843524932861328
V
-1,0
BOT
0,26.5338333333333
V
0,0.838279724121094
V
-1,0
BOT
0,26.5405
V
0,0.833034515380859
V
-1,0
BOT
0,26.5471666666667
V
0,0.828742980957031
V
-1,0
BOT
0,26.5538333333333
V
0,0.825405120849609
V
-1,0
BOT
0,26.5605
V
0,0.822067260742188
V
-1,0
BOT
0,26.5671666666667
V
0,0.817775726318359
V
-1,0
BOT
0,26.5738333333333
V
0,0.812053680419922
V
-1,0
BOT
0,26.5805
V
0,0.807285308837891
V
-1,0
BOT
0,26.5871666666667
V
0,0.802516937255859
V
-1,0
BOT
0,26.5938333333333
V
0,0.798225402832031
V
-1,0
BOT
0,26.6005
V
0,0.79345703125
V
-1,0
BOT
0,26.6071666666667
V
0,0.789165496826172
V
-1,0
BOT
0,26.6138333333333
V
0,0.786304473876953
V
-1,0
BOT
0,26.6205
V
0,0.783920288085938
V
-1,0
BOT
0,26.6271666666667
V
0,0.780582427978516
V
-1,0
BOT
0,26.6338333333333
V
0,0.777244567871094
V
-1,0
BOT
0,26.6405
V
0,0.773906707763672
V
-1,0
BOT
0,26.6471666666667
V
0,0.771522521972656
V
-1,0
BOT
0,26.6538333333333
V
0,0.768184661865234
V
-1,0
BOT
0,26.6605
V
0,0.765323638916016
V
-1,0
BOT
0,26.6671666666667
V
0,0.762462615966797
V
-1,0
BOT
0,26.6738333333333
V
0,0.759601593017578
V
-1,0
BOT
0,26.6805
V
0,0.756263732910156
V
-1,0
BOT
0,26.6871666666667
V
0,0.752449035644531
V
-1,0
BOT
0,26.6938333333333
V
0,0.749111175537109
V
-1,0
BOT
0,26.7005
V
0,0.745296478271484
V
-1,0
BOT
0,26.7071666666667
V
0,0.741004943847656
V
-1,0
BOT
0,26.7138333333333
V
0,0.736236572265625
V
-1,0
BOT
0,26.7205
V
0,0.731945037841797
V
-1,0
BOT
0,26.7271666666667
V
0,0.728607177734375
V
-1,0
BOT
0,26.7338333333333
V
0,0.726699829101563
V
-1,0
BOT
0,26.7405
V
0,0.727176666259766
V
-1,0
BOT
0,26.7471666666667
V
0,0.730991363525391
V
-1,0
BOT
0,26.7538333333333
V
0,0.737190246582031
V
-1,0
BOT
0,26.7605
V
0,0.747203826904297
V
-1,0
BOT
0,26.7671666666667
V
0,0.761508941650391
V
-1,0
BOT
0,26.7738333333333
V
0,0.780582427978516
V
-1,0
BOT
0,26.7805
V
0,0.803470611572266
V
-1,0
BOT
0,26.7871666666667
V
0,0.830650329589844
V
-1,0
BOT
0,26.7938333333333
V
0,0.863075256347656
V
-1,0
BOT
0,26.8005
V
0,0.901222229003906
V
-1,0
BOT
0,26.8071666666667
V
0,0.944614410400391
V
-1,0
BOT
0,26.8138333333333
V
0,0.992298126220703
V
-1,0
BOT
0,26.8205
V
0,1.04570388793945
V
-1,0
BOT
0,26.8271666666667
V
0,1.10578536987305
V
-1,0
BOT
0,26.8338333333333
V
0,1.17158889770508
V
-1,0
BOT
0,26.8405
V
0,1.24263763427734
V
-1,0
BOT
0,26.8471666666667
V
0,1.31750106811523
V
-1,0
BOT
0,26.8538333333333
V
0,1.39570236206055
V
-1,0
BOT
0,26.8605
V
0,1.47628784179687
V
-1,0
BOT
0,26.8671666666667
V
0,1.55925750732422
V
-1,0
BOT
0,26.8738333333333
V
0,1.64175033569336
V
-1,0
BOT
0,26.8805
V
0,1.72233581542969
V
-1,0
BOT
0,26.8871666666667
V
0,1.79910659790039
V
-1,0
BOT
0,26.8938333333333
V
0,1.87110900878906
V
-1,0
BOT
0,26.9005
V
0,1.93691253662109
V
-1,0
BOT
0,26.9071666666667
V
0,1.99413299560547
V
-1,0
BOT
0,26.9138333333333
V
0,2.04181671142578
V
-1,0
BOT
0,26.9205
V
0,2.07948684692383
V
-1,0
BOT
0,26.9271666666667
V
0,2.10666656494141
V
-1,0
BOT
0,26.9338333333333
V
0,2.12287902832031
V
-1,0
BOT
0,26.9405
V
0,2.12717056274414
V
-1,0
BOT
0,26.9471666666667
V
0,2.1209716796875
V
-1,0
BOT
0,26.9538333333333
V
0,2.105712890625
V
-1,0
BOT
0,26.9605
V
0,2.08139419555664
V
-1,0
BOT
0,26.9671666666667
V
0,2.04753875732422
V
-1,0
BOT
0,26.9738333333333
V
0,2.00462341308594
V
-1,0
BOT
0,26.9805
V
0,1.95455551147461
V
-1,0
BOT
0,26.9871666666667
V
0,1.89733505249023
V
-1,0
BOT
0,26.9938333333333
V
0,1.83296203613281
V
-1,0
BOT
0,27.0005
V
0,1.76382064819336
V
-1,0
BOT
0,27.0071666666667
V
0,1.69134140014648
V
-1,0
BOT
0,27.0138333333333
V
0,1.617431640625
V
-1,0
BOT
0,27.0205
V
0,1.54304504394531
V
-1,0
BOT
0,27.0271666666667
V
0,1.46865844726562
V
-1,0
BOT
0,27.0338333333333
V
0,1.39522552490234
V
-1,0
BOT
0,27.0405
V
0,1.32369995117187
V
-1,0
BOT
0,27.0471666666667
V
0,1.25408172607422
V
-1,0
BOT
0,27.0538333333333
V
0,1.18732452392578
V
-1,0
BOT
0,27.0605
V
0,1.12342834472656
V
-1,0
BOT
0,27.0671666666667
V
0,1.06382369995117
V
-1,0
BOT
0,27.0738333333333
V
0,1.00898742675781
V
-1,0
BOT
0,27.0805
V
0,0.958919525146484
V
-1,0
BOT
0,27.0871666666667
V
0,0.914096832275391
V
-1,0
BOT
0,27.0938333333333
V
0,0.874996185302734
V
-1,0
BOT
0,27.1005
V
0,0.840187072753906
V
-1,0
BOT
0,27.1071666666667
V
0,0.8087158203125
V
-1,0
BOT
0,27.1138333333333
V
0,0.779628753662109
V
-1,0
BOT
0,27.1205
V
0,0.752449035644531
V
-1,0
BOT
0,27.1271666666667
V
0,0.727176666259766
V
-1,0
BOT
0,27.1338333333333
V
0,0.703811645507813
V
-1,0
BOT
0,27.1405
V
0,0.681877136230469
V
-1,0
BOT
0,27.1471666666667
V
0,0.661849975585938
V
-1,0
BOT
0,27.1538333333333
V
0,0.644683837890625
V
-1,0
BOT
0,27.1605
V
0,0.629425048828125
V
-1,0
BOT
0,27.1671666666667
V
0,0.616073608398438
V
-1,0
BOT
0,27.1738333333333
V
0,0.603675842285156
V
-1,0
BOT
0,27.1805
V
0,0.592708587646484
V
-1,0
BOT
0,27.1871666666667
V
0,0.582695007324219
V
-1,0
BOT
0,27.1938333333333
V
0,0.574111938476563
V
-1,0
BOT
0,27.2005
V
0,0.565052032470703
V
-1,0
BOT
0,27.2071666666667
V
0,0.556468963623047
V
-1,0
BOT
0,27.2138333333333
V
0,0.54931640625
V
-1,0
BOT
0,27.2205
V
0,0.542640686035156
V
-1,0
BOT
0,27.2271666666667
V
0,0.536441802978516
V
-1,0
BOT
0,27.2338333333333
V
0,0.531196594238281
V
-1,0
BOT
0,27.2405
V
0,0.526905059814453
V
-1,0
BOT
0,27.2471666666667
V
0,0.523567199707031
V
-1,0
BOT
0,27.2538333333333
V
0,0.520706176757813
V
-1,0
BOT
0,27.2605
V
0,0.518798828125
V
-1,0
BOT
0,27.2671666666667
V
0,0.516414642333984
V
-1,0
BOT
0,27.2738333333333
V
0,0.514030456542969
V
-1,0
BOT
0,27.2805
V
0,0.512599945068359
V
-1,0
BOT
0,27.2871666666667
V
0,0.511646270751953
V
-1,0
BOT
0,27.2938333333333
V
0,0.51116943359375
V
-1,0
BOT
0,27.3005
V
0,0.510692596435547
V
-1,0
BOT
0,27.3071666666667
V
0,0.509738922119141
V
-1,0
BOT
0,27.3138333333333
V
0,0.509262084960938
V
-1,0
BOT
0,27.3205
V
0,0.509738922119141
V
-1,0
BOT
0,27.3271666666667
V
0,0.510215759277344
V
-1,0
BOT
0,27.3338333333333
V
0,0.51116943359375
V
-1,0
BOT
0,27.3405
V
0,0.512599945068359
V
-1,0
BOT
0,27.3471666666667
V
0,0.514984130859375
V
-1,0
BOT
0,27.3538333333333
V
0,0.518798828125
V
-1,0
BOT
0,27.3605
V
0,0.523567199707031
V
-1,0
BOT
0,27.3671666666667
V
0,0.529289245605469
V
-1,0
BOT
0,27.3738333333333
V
0,0.535011291503906
V
-1,0
BOT
0,27.3805
V
0,0.540733337402344
V
-1,0
BOT
0,27.3871666666667
V
0,0.546455383300781
V
-1,0
BOT
0,27.3938333333333
V
0,0.552654266357422
V
-1,0
BOT
0,27.4005
V
0,0.557899475097656
V
-1,0
BOT
0,27.4071666666667
V
0,0.563621520996094
V
-1,0
BOT
0,27.4138333333333
V
0,0.570297241210938
V
-1,0
BOT
0,27.4205
V
0,0.578403472900391
V
-1,0
BOT
0,27.4271666666667
V
0,0.587940216064453
V
-1,0
BOT
0,27.4338333333333
V
0,0.598430633544922
V
-1,0
BOT
0,27.4405
V
0,0.6103515625
V
-1,0
BOT
0,27.4471666666667
V
0,0.624179840087891
V
-1,0
BOT
0,27.4538333333333
V
0,0.640869140625
V
-1,0
BOT
0,27.4605
V
0,0.661849975585938
V
-1,0
BOT
0,27.4671666666667
V
0,0.686168670654297
V
-1,0
BOT
0,27.4738333333333
V
0,0.712871551513672
V
-1,0
BOT
0,27.4805
V
0,0.743865966796875
V
-1,0
BOT
0,27.4871666666667
V
0,0.7781982421875
V
-1,0
BOT
0,27.4938333333333
V
0,0.81634521484375
V
-1,0
BOT
0,27.5005
V
0,0.858783721923828
V
-1,0
BOT
0,27.5071666666667
V
0,0.906944274902344
V
-1,0
BOT
0,27.5138333333333
V
0,0.9613037109375
V
-1,0
BOT
0,27.5205
V
0,1.0218620300293
V
-1,0
BOT
0,27.5271666666667
V
0,1.08718872070312
V
-1,0
BOT
0,27.5338333333333
V
0,1.15823745727539
V
-1,0
BOT
0,27.5405
V
0,1.23500823974609
V
-1,0
BOT
0,27.5471666666667
V
0,1.31607055664062
V
-1,0
BOT
0,27.5538333333333
V
0,1.39999389648437
V
-1,0
BOT
0,27.5605
V
0,1.48677825927734
V
-1,0
BOT
0,27.5671666666667
V
0,1.57642364501953
V
-1,0
BOT
0,27.5738333333333
V
0,1.66559219360352
V
-1,0
BOT
0,27.5805
V
0,1.75237655639648
V
-1,0
BOT
0,27.5871666666667
V
0,1.83391571044922
V
-1,0
BOT
0,27.5938333333333
V
0,1.91020965576172
V
-1,0
BOT
0,27.6005
V
0,1.98030471801758
V
-1,0
BOT
0,27.6071666666667
V
0,2.04181671142578
V
-1,0
BOT
0,27.6138333333333
V
0,2.09474563598633
V
-1,0
BOT
0,27.6205
V
0,2.13909149169922
V
-1,0
BOT
0,27.6271666666667
V
0,2.17342376708984
V
-1,0
BOT
0,27.6338333333333
V
0,2.1977424621582
V
-1,0
BOT
0,27.6405
V
0,2.21157073974609
V
-1,0
BOT
0,27.6471666666667
V
0,2.21395492553711
V
-1,0
BOT
0,27.6538333333333
V
0,2.20584869384766
V
-1,0
BOT
0,27.6605
V
0,2.18629837036133
V
-1,0
BOT
0,27.6671666666667
V
0,2.15673446655273
V
-1,0
BOT
0,27.6738333333333
V
0,2.11811065673828
V
-1,0
BOT
0,27.6805
V
0,2.07233428955078
V
-1,0
BOT
0,27.6871666666667
V
0,2.01940536499023
V
-1,0
BOT
0,27.6938333333333
V
0,1.96075439453125
V
-1,0
BOT
0,27.7005
V
0,1.89781188964844
V
-1,0
BOT
0,27.7071666666667
V
0,1.8315315246582
V
-1,0
BOT
0,27.7138333333333
V
0,1.76382064819336
V
-1,0
BOT
0,27.7205
V
0,1.69467926025391
V
-1,0
BOT
0,27.7271666666667
V
0,1.62649154663086
V
-1,0
BOT
0,27.7338333333333
V
0,1.55973434448242
V
-1,0
BOT
0,27.7405
V
0,1.4948844909668
V
-1,0
BOT
0,27.7471666666667
V
0,1.43289566040039
V
-1,0
BOT
0,27.7538333333333
V
0,1.373291015625
V
-1,0
BOT
0,27.7605
V
0,1.31654739379883
V
-1,0
BOT
0,27.7671666666667
V
0,1.26457214355469
V
-1,0
BOT
0,27.7738333333333
V
0,1.21784210205078
V
-1,0
BOT
0,27.7805
V
0,1.17635726928711
V
-1,0
BOT
0,27.7871666666667
V
0,1.13916397094727
V
-1,0
BOT
0,27.7938333333333
V
0,1.10673904418945
V
-1,0
BOT
0,27.8005
V
0,1.07955932617187
V
-1,0
BOT
0,27.8071666666667
V
0,1.05810165405273
V
-1,0
BOT
0,27.8138333333333
V
0,1.03998184204102
V
-1,0
BOT
0,27.8205
V
0,1.02615356445312
V
-1,0
BOT
0,27.8271666666667
V
0,1.01757049560547
V
-1,0
BOT
0,27.8338333333333
V
0,1.01327896118164
V
-1,0
BOT
0,27.8405
V
0,1.01184844970703
V
-1,0
BOT
0,27.8471666666667
V
0,1.01280212402344
V
-1,0
BOT
0,27.8538333333333
V
0,1.01852416992187
V
-1,0
BOT
0,27.8605
V
0,1.02758407592773
V
-1,0
BOT
0,27.8671666666667
V
0,1.03998184204102
V
-1,0
BOT
0,27.8738333333333
V
0,1.05571746826172
V
-1,0
BOT
0,27.8805
V
0,1.07383728027344
V
-1,0
BOT
0,27.8871666666667
V
0,1.09434127807617
V
-1,0
BOT
0,27.8938333333333
V
0,1.11484527587891
V
-1,0
BOT
0,27.9005
V
0,1.13630294799805
V
-1,0
BOT
0,27.9071666666667
V
0,1.15871429443359
V
-1,0
BOT
0,27.9138333333333
V
0,1.18207931518555
V
-1,0
BOT
0,27.9205
V
0,1.2054443359375
V
-1,0
BOT
0,27.9271666666667
V
0,1.22880935668945
V
-1,0
BOT
0,27.9338333333333
V
0,1.25217437744141
V
-1,0
BOT
0,27.9405
V
0,1.27410888671875
V
-1,0
BOT
0,27.9471666666667
V
0,1.29413604736328
V
-1,0
BOT
0,27.9538333333333
V
0,1.312255859375
V
-1,0
BOT
0,27.9605
V
0,1.3275146484375
V
-1,0
BOT
0,27.9671666666667
V
0,1.34038925170898
V
-1,0
BOT
0,27.9738333333333
V
0,1.34992599487305
V
-1,0
BOT
0,27.9805
V
0,1.35707855224609
V
-1,0
BOT
0,27.9871666666667
V
0,1.36089324951172
V
-1,0
BOT
0,27.9938333333333
V
0,1.36089324951172
V
-1,0
BOT
0,28.0005
V
0,1.3575553894043
V
-1,0
BOT
0,28.0071666666667
V
0,1.35087966918945
V
-1,0
BOT
0,28.0138333333333
V
0,1.34181976318359
V
-1,0
BOT
0,28.0205
V
0,1.32942199707031
V
-1,0
BOT
0,28.0271666666667
V
0,1.312255859375
V
-1,0
BOT
0,28.0338333333333
V
0,1.28984451293945
V
-1,0
BOT
0,28.0405
V
0,1.26361846923828
V
-1,0
BOT
0,28.0471666666667
V
0,1.23357772827148
V
-1,0
BOT
0,28.0538333333333
V
0,1.20067596435547
V
-1,0
BOT
0,28.0605
V
0,1.16586685180664
V
-1,0
BOT
0,28.0671666666667
V
0,1.13058090209961
V
-1,0
BOT
0,28.0738333333333
V
0,1.09577178955078
V
-1,0
BOT
0,28.0805
V
0,1.06096267700195
V
-1,0
BOT
0,28.0871666666667
V
0,1.02567672729492
V
-1,0
BOT
0,28.0938333333333
V
0,0.989913940429688
V
-1,0
BOT
0,28.1005
V
0,0.95367431640625
V
-1,0
BOT
0,28.1071666666667
V
0,0.918388366699219
V
-1,0
BOT
0,28.1138333333333
V
0,0.884056091308594
V
-1,0
BOT
0,28.1205
V
0,0.851154327392578
V
-1,0
BOT
0,28.1271666666667
V
0,0.820159912109375
V
-1,0
BOT
0,28.1338333333333
V
0,0.790119171142578
V
-1,0
BOT
0,28.1405
V
0,0.761032104492188
V
-1,0
BOT
0,28.1471666666667
V
0,0.732898712158203
V
-1,0
BOT
0,28.1538333333333
V
0,0.705718994140625
V
-1,0
BOT
0,28.1605
V
0,0.680446624755859
V
-1,0
BOT
0,28.1671666666667
V
0,0.657081604003906
V
-1,0
BOT
0,28.1738333333333
V
0,0.635623931884766
V
-1,0
BOT
0,28.1805
V
0,0.617027282714844
V
-1,0
BOT
0,28.1871666666667
V
0,0.601291656494141
V
-1,0
BOT
0,28.1938333333333
V
0,0.586986541748047
V
-1,0
BOT
0,28.2005
V
0,0.574588775634766
V
-1,0
BOT
0,28.2071666666667
V
0,0.563621520996094
V
-1,0
BOT
0,28.2138333333333
V
0,0.553131103515625
V
-1,0
BOT
0,28.2205
V
0,0.543594360351563
V
-1,0
BOT
0,28.2271666666667
V
0,0.535011291503906
V
-1,0
BOT
0,28.2338333333333
V
0,0.527381896972656
V
-1,0
BOT
0,28.2405
V
0,0.520706176757813
V
-1,0
BOT
0,28.2471666666667
V
0,0.514984130859375
V
-1,0
BOT
0,28.2538333333333
V
0,0.509738922119141
V
-1,0
BOT
0,28.2605
V
0,0.505447387695313
V
-1,0
BOT
0,28.2671666666667
V
0,0.502109527587891
V
-1,0
BOT
0,28.2738333333333
V
0,0.499248504638672
V
-1,0
BOT
0,28.2805
V
0,0.497817993164063
V
-1,0
BOT
0,28.2871666666667
V
0,0.497817993164063
V
-1,0
BOT
0,28.2938333333333
V
0,0.498771667480469
V
-1,0
BOT
0,28.3005
V
0,0.500202178955078
V
-1,0
BOT
0,28.3071666666667
V
0,0.501155853271484
V
-1,0
BOT
0,28.3138333333333
V
0,0.502586364746094
V
-1,0
BOT
0,28.3205
V
0,0.504493713378906
V
-1,0
BOT
0,28.3271666666667
V
0,0.506401062011719
V
-1,0
BOT
0,28.3338333333333
V
0,0.508785247802734
V
-1,0
BOT
0,28.3405
V
0,0.513076782226563
V
-1,0
BOT
0,28.3471666666667
V
0,0.519275665283203
V
-1,0
BOT
0,28.3538333333333
V
0,0.525474548339844
V
-1,0
BOT
0,28.3605
V
0,0.530242919921875
V
-1,0
BOT
0,28.3671666666667
V
0,0.534534454345703
V
-1,0
BOT
0,28.3738333333333
V
0,0.538825988769531
V
-1,0
BOT
0,28.3805
V
0,0.542163848876953
V
-1,0
BOT
0,28.3871666666667
V
0,0.545501708984375
V
-1,0
BOT
0,28.3938333333333
V
0,0.549793243408203
V
-1,0
BOT
0,28.4005
V
0,0.555992126464844
V
-1,0
BOT
0,28.4071666666667
V
0,0.563144683837891
V
-1,0
BOT
0,28.4138333333333
V
0,0.569820404052734
V
-1,0
BOT
0,28.4205
V
0,0.575542449951172
V
-1,0
BOT
0,28.4271666666667
V
0,0.580310821533203
V
-1,0
BOT
0,28.4338333333333
V
0,0.585079193115234
V
-1,0
BOT
0,28.4405
V
0,0.588893890380859
V
-1,0
BOT
0,28.4471666666667
V
0,0.592708587646484
V
-1,0
BOT
0,28.4538333333333
V
0,0.595569610595703
V
-1,0
BOT
0,28.4605
V
0,0.598907470703125
V
-1,0
BOT
0,28.4671666666667
V
0,0.601768493652344
V
-1,0
BOT
0,28.4738333333333
V
0,0.604629516601563
V
-1,0
BOT
0,28.4805
V
0,0.606060028076172
V
-1,0
BOT
0,28.4871666666667
V
0,0.607013702392578
V
-1,0
BOT
0,28.4938333333333
V
0,0.607490539550781
V
-1,0
BOT
0,28.5005
V
0,0.606536865234375
V
-1,0
BOT
0,28.5071666666667
V
0,0.605106353759766
V
-1,0
BOT
0,28.5138333333333
V
0,0.603675842285156
V
-1,0
BOT
0,28.5205
V
0,0.601768493652344
V
-1,0
BOT
0,28.5271666666667
V
0,0.600337982177734
V
-1,0
BOT
0,28.5338333333333
V
0,0.599861145019531
V
-1,0
BOT
0,28.5405
V
0,0.600337982177734
V
-1,0
BOT
0,28.5471666666667
V
0,0.602245330810547
V
-1,0
BOT
0,28.5538333333333
V
0,0.604152679443359
V
-1,0
BOT
0,28.5605
V
0,0.607967376708984
V
-1,0
BOT
0,28.5671666666667
V
0,0.613212585449219
V
-1,0
BOT
0,28.5738333333333
V
0,0.620365142822266
V
-1,0
BOT
0,28.5805
V
0,0.628471374511719
V
-1,0
BOT
0,28.5871666666667
V
0,0.637054443359375
V
-1,0
BOT
0,28.5938333333333
V
0,0.648021697998047
V
-1,0
BOT
0,28.6005
V
0,0.660896301269531
V
-1,0
BOT
0,28.6071666666667
V
0,0.674247741699219
V
-1,0
BOT
0,28.6138333333333
V
0,0.687599182128906
V
-1,0
BOT
0,28.6205
V
0,0.702857971191406
V
-1,0
BOT
0,28.6271666666667
V
0,0.719547271728516
V
-1,0
BOT
0,28.6338333333333
V
0,0.736236572265625
V
-1,0
BOT
0,28.6405
V
0,0.751972198486328
V
-1,0
BOT
0,28.6471666666667
V
0,0.765800476074219
V
-1,0
BOT
0,28.6538333333333
V
0,0.780105590820313
V
-1,0
BOT
0,28.6605
V
0,0.79345703125
V
-1,0
BOT
0,28.6671666666667
V
0,0.805377960205078
V
-1,0
BOT
0,28.6738333333333
V
0,0.815868377685547
V
-1,0
BOT
0,28.6805
V
0,0.825405120849609
V
-1,0
BOT
0,28.6871666666667
V
0,0.834465026855469
V
-1,0
BOT
0,28.6938333333333
V
0,0.841617584228516
V
-1,0
BOT
0,28.7005
V
0,0.847339630126953
V
-1,0
BOT
0,28.7071666666667
V
0,0.851631164550781
V
-1,0
BOT
0,28.7138333333333
V
0,0.8544921875
V
-1,0
BOT
0,28.7205
V
0,0.855922698974609
V
-1,0
BOT
0,28.7271666666667
V
0,0.8544921875
V
-1,0
BOT
0,28.7338333333333
V
0,0.851631164550781
V
-1,0
BOT
0,28.7405
V
0,0.84686279296875
V
-1,0
BOT
0,28.7471666666667
V
0,0.840663909912109
V
-1,0
BOT
0,28.7538333333333
V
0,0.833034515380859
V
-1,0
BOT
0,28.7605
V
0,0.823497772216797
V
-1,0
BOT
0,28.7671666666667
V
0,0.813484191894531
V
-1,0
BOT
0,28.7738333333333
V
0,0.802516937255859
V
-1,0
BOT
0,28.7805
V
0,0.791072845458984
V
-1,0
BOT
0,28.7871666666667
V
0,0.780582427978516
V
-1,0
BOT
0,28.7938333333333
V
0,0.77056884765625
V
-1,0
BOT
0,28.8005
V
0,0.761032104492188
V
-1,0
BOT
0,28.8071666666667
V
0,0.752925872802734
V
-1,0
BOT
0,28.8138333333333
V
0,0.745773315429688
V
-1,0
BOT
0,28.8205
V
0,0.74005126953125
V
-1,0
BOT
0,28.8271666666667
V
0,0.736236572265625
V
-1,0
BOT
0,28.8338333333333
V
0,0.734329223632813
V
-1,0
BOT
0,28.8405
V
0,0.734806060791016
V
-1,0
BOT
0,28.8471666666667
V
0,0.736713409423828
V
-1,0
BOT
0,28.8538333333333
V
0,0.740528106689453
V
-1,0
BOT
0,28.8605
V
0,0.746726989746094
V
-1,0
BOT
0,28.8671666666667
V
0,0.755786895751953
V
-1,0
BOT
0,28.8738333333333
V
0,0.765800476074219
V
-1,0
BOT
0,28.8805
V
0,0.777244567871094
V
-1,0
BOT
0,28.8871666666667
V
0,0.792026519775391
V
-1,0
BOT
0,28.8938333333333
V
0,0.810623168945313
V
-1,0
BOT
0,28.9005
V
0,0.833034515380859
V
-1,0
BOT
0,28.9071666666667
V
0,0.856876373291016
V
-1,0
BOT
0,28.9138333333333
V
0,0.883579254150391
V
-1,0
BOT
0,28.9205
V
0,0.913619995117188
V
-1,0
BOT
0,28.9271666666667
V
0,0.946044921875
V
-1,0
BOT
0,28.9338333333333
V
0,0.979900360107422
V
-1,0
BOT
0,28.9405
V
0,1.01375579833984
V
-1,0
BOT
0,28.9471666666667
V
0,1.04951858520508
V
-1,0
BOT
0,28.9538333333333
V
0,1.08623504638672
V
-1,0
BOT
0,28.9605
V
0,1.12247467041016
V
-1,0
BOT
0,28.9671666666667
V
0,1.15633010864258
V
-1,0
BOT
0,28.9738333333333
V
0,1.18827819824219
V
-1,0
BOT
0,28.9805
V
0,1.21784210205078
V
-1,0
BOT
0,28.9871666666667
V
0,1.24216079711914
V
-1,0
BOT
0,28.9938333333333
V
0,1.26314163208008
V
-1,0
BOT
0,29.0005
V
0,1.28030776977539
V
-1,0
BOT
0,29.0071666666667
V
0,1.29318237304687
V
-1,0
BOT
0,29.0138333333333
V
0,1.30081176757812
V
-1,0
BOT
0,29.0205
V
0,1.30224227905273
V
-1,0
BOT
0,29.0271666666667
V
0,1.29938125610352
V
-1,0
BOT
0,29.0338333333333
V
0,1.29127502441406
V
-1,0
BOT
0,29.0405
V
0,1.27840042114258
V
-1,0
BOT
0,29.0471666666667
V
0,1.26028060913086
V
-1,0
BOT
0,29.0538333333333
V
0,1.23739242553711
V
-1,0
BOT
0,29.0605
V
0,1.20973587036133
V
-1,0
BOT
0,29.0671666666667
V
0,1.17826461791992
V
-1,0
BOT
0,29.0738333333333
V
0,1.14297866821289
V
-1,0
BOT
0,29.0805
V
0,1.10578536987305
V
-1,0
BOT
0,29.0871666666667
V
0,1.06620788574219
V
-1,0
BOT
0,29.0938333333333
V
0,1.02567672729492
V
-1,0
BOT
0,29.1005
V
0,0.984668731689453
V
-1,0
BOT
0,29.1071666666667
V
0,0.944614410400391
V
-1,0
BOT
0,29.1138333333333
V
0,0.903606414794922
V
-1,0
BOT
0,29.1205
V
0,0.863075256347656
V
-1,0
BOT
0,29.1271666666667
V
0,0.823497772216797
V
-1,0
BOT
0,29.1338333333333
V
0,0.787734985351563
V
-1,0
BOT
0,29.1405
V
0,0.754356384277344
V
-1,0
BOT
0,29.1471666666667
V
0,0.721931457519531
V
-1,0
BOT
0,29.1538333333333
V
0,0.690460205078125
V
-1,0
BOT
0,29.1605
V
0,0.661373138427734
V
-1,0
BOT
0,29.1671666666667
V
0,0.633716583251953
V
-1,0
BOT
0,29.1738333333333
V
0,0.606536865234375
V
-1,0
BOT
0,29.1805
V
0,0.581741333007813
V
-1,0
BOT
0,29.1871666666667
V
0,0.559806823730469
V
-1,0
BOT
0,29.1938333333333
V
0,0.540733337402344
V
-1,0
BOT
0,29.2005
V
0,0.524044036865234
V
-1,0
BOT
0,29.2071666666667
V
0,0.508785247802734
V
-1,0
BOT
0,29.2138333333333
V
0,0.497341156005859
V
-1,0
BOT
0,29.2205
V
0,0.487804412841797
V
-1,0
BOT
0,29.2271666666667
V
0,0.479221343994141
V
-1,0
BOT
0,29.2338333333333
V
0,0.470638275146484
V
-1,0
BOT
0,29.2405
V
0,0.462532043457031
V
-1,0
BOT
0,29.2471666666667
V
0,0.453948974609375
V
-1,0
BOT
0,29.2538333333333
V
0,0.444412231445313
V
-1,0
BOT
0,29.2605
V
0,0.43487548828125
V
-1,0
BOT
0,29.2671666666667
V
0,0.427722930908203
V
-1,0
BOT
0,29.2738333333333
V
0,0.422954559326172
V
-1,0
BOT
0,29.2805
V
0,0.420570373535156
V
-1,0
BOT
0,29.2871666666667
V
0,0.41961669921875
V
-1,0
BOT
0,29.2938333333333
V
0,0.420093536376953
V
-1,0
BOT
0,29.3005
V
0,0.421047210693359
V
-1,0
BOT
0,29.3071666666667
V
0,0.421047210693359
V
-1,0
BOT
0,29.3138333333333
V
0,0.420093536376953
V
-1,0
BOT
0,29.3205
V
0,0.41961669921875
V
-1,0
BOT
0,29.3271666666667
V
0,0.420570373535156
V
-1,0
BOT
0,29.3338333333333
V
0,0.422954559326172
V
-1,0
BOT
0,29.3405
V
0,0.425815582275391
V
-1,0
BOT
0,29.3471666666667
V
0,0.428199768066406
V
-1,0
BOT
0,29.3538333333333
V
0,0.430107116699219
V
-1,0
BOT
0,29.3605
V
0,0.431537628173828
V
-1,0
BOT
0,29.3671666666667
V
0,0.432014465332031
V
-1,0
BOT
0,29.3738333333333
V
0,0.432491302490234
V
-1,0
BOT
0,29.3805
V
0,0.432968139648438
V
-1,0
BOT
0,29.3871666666667
V
0,0.435829162597656
V
-1,0
BOT
0,29.3938333333333
V
0,0.440597534179688
V
-1,0
BOT
0,29.4005
V
0,0.446796417236328
V
-1,0
BOT
0,29.4071666666667
V
0,0.453948974609375
V
-1,0
BOT
0,29.4138333333333
V
0,0.462055206298828
V
-1,0
BOT
0,29.4205
V
0,0.470161437988281
V
-1,0
BOT
0,29.4271666666667
V
0,0.477313995361328
V
-1,0
BOT
0,29.4338333333333
V
0,0.484466552734375
V
-1,0
BOT
0,29.4405
V
0,0.491619110107422
V
-1,0
BOT
0,29.4471666666667
V
0,0.499248504638672
V
-1,0
BOT
0,29.4538333333333
V
0,0.506877899169922
V
-1,0
BOT
0,29.4605
V
0,0.514507293701172
V
-1,0
BOT
0,29.4671666666667
V
0,0.523090362548828
V
-1,0
BOT
0,29.4738333333333
V
0,0.531673431396484
V
-1,0
BOT
0,29.4805
V
0,0.540256500244141
V
-1,0
BOT
0,29.4871666666667
V
0,0.548839569091797
V
-1,0
BOT
0,29.4938333333333
V
0,0.556468963623047
V
-1,0
BOT
0,29.5005
V
0,0.564098358154297
V
-1,0
BOT
0,29.5071666666667
V
0,0.571250915527344
V
-1,0
BOT
0,29.5138333333333
V
0,0.577449798583984
V
-1,0
BOT
0,29.5205
V
0,0.583648681640625
V
-1,0
BOT
0,29.5271666666667
V
0,0.590324401855469
V
-1,0
BOT
0,29.5338333333333
V
0,0.597476959228516
V
-1,0
BOT
0,29.5405
V
0,0.605106353759766
V
-1,0
BOT
0,29.5471666666667
V
0,0.612735748291016
V
-1,0
BOT
0,29.5538333333333
V
0,0.619888305664063
V
-1,0
BOT
0,29.5605
V
0,0.626087188720703
V
-1,0
BOT
0,29.5671666666667
V
0,0.630855560302734
V
-1,0
BOT
0,29.5738333333333
V
0,0.634193420410156
V
-1,0
BOT
0,29.5805
V
0,0.637531280517578
V
-1,0
BOT
0,29.5871666666667
V
0,0.640392303466797
V
-1,0
BOT
0,29.5938333333333
V
0,0.642776489257813
V
-1,0
BOT
0,29.6005
V
0,0.643253326416016
V
-1,0
BOT
0,29.6071666666667
V
0,0.643253326416016
V
-1,0
BOT
0,29.6138333333333
V
0,0.642776489257813
V
-1,0
BOT
0,29.6205
V
0,0.642299652099609
V
-1,0
BOT
0,29.6271666666667
V
0,0.640869140625
V
-1,0
BOT
0,29.6338333333333
V
0,0.639438629150391
V
-1,0
BOT
0,29.6405
V
0,0.637531280517578
V
-1,0
BOT
0,29.6471666666667
V
0,0.635623931884766
V
-1,0
BOT
0,29.6538333333333
V
0,0.632286071777344
V
-1,0
BOT
0,29.6605
V
0,0.628471374511719
V
-1,0
BOT
0,29.6671666666667
V
0,0.624656677246094
V
-1,0
BOT
0,29.6738333333333
V
0,0.621795654296875
V
-1,0
BOT
0,29.6805
V
0,0.618934631347656
V
-1,0
BOT
0,29.6871666666667
V
0,0.615596771240234
V
-1,0
BOT
0,29.6938333333333
V
0,0.611305236816406
V
-1,0
BOT
0,29.7005
V
0,0.606060028076172
V
-1,0
BOT
0,29.7071666666667
V
0,0.600337982177734
V
-1,0
BOT
0,29.7138333333333
V
0,0.593662261962891
V
-1,0
BOT
0,29.7205
V
0,0.586509704589844
V
-1,0
BOT
0,29.7271666666667
V
0,0.579357147216797
V
-1,0
BOT
0,29.7338333333333
V
0,0.572681427001953
V
-1,0
BOT
0,29.7405
V
0,0.565528869628906
V
-1,0
BOT
0,29.7471666666667
V
0,0.55694580078125
V
-1,0
BOT
0,29.7538333333333
V
0,0.548362731933594
V
-1,0
BOT
0,29.7605
V
0,0.539779663085938
V
-1,0
BOT
0,29.7671666666667
V
0,0.531196594238281
V
-1,0
BOT
0,29.7738333333333
V
0,0.523090362548828
V
-1,0
BOT
0,29.7805
V
0,0.515460968017578
V
-1,0
BOT
0,29.7871666666667
V
0,0.508785247802734
V
-1,0
BOT
0,29.7938333333333
V
0,0.501632690429688
V
-1,0
BOT
0,29.8005
V
0,0.493526458740234
V
-1,0
BOT
0,29.8071666666667
V
0,0.485897064208984
V
-1,0
BOT
0,29.8138333333333
V
0,0.478267669677734
V
-1,0
BOT
0,29.8205
V
0,0.470638275146484
V
-1,0
BOT
0,29.8271666666667
V
0,0.461578369140625
V
-1,0
BOT
0,29.8338333333333
V
0,0.453472137451172
V
-1,0
BOT
0,29.8405
V
0,0.446319580078125
V
-1,0
BOT
0,29.8471666666667
V
0,0.440597534179688
V
-1,0
BOT
0,29.8538333333333
V
0,0.435352325439453
V
-1,0
BOT
0,29.8605
V
0,0.430583953857422
V
-1,0
BOT
0,29.8671666666667
V
0,0.42724609375
V
-1,0
BOT
0,29.8738333333333
V
0,0.423908233642578
V
-1,0
BOT
0,29.8805
V
0,0.420570373535156
V
-1,0
BOT
0,29.8871666666667
V
0,0.416755676269531
V
-1,0
BOT
0,29.8938333333333
V
0,0.412464141845703
V
-1,0
BOT
0,29.9005
V
0,0.407695770263672
V
-1,0
BOT
0,29.9071666666667
V
0,0.403404235839844
V
-1,0
BOT
0,29.9138333333333
V
0,0.399112701416016
V
-1,0
BOT
0,29.9205
V
0,0.394344329833984
V
-1,0
BOT
0,29.9271666666667
V
0,0.388145446777344
V
-1,0
BOT
0,29.9338333333333
V
0,0.382900238037109
V
-1,0
BOT
0,29.9405
V
0,0.379085540771484
V
-1,0
BOT
0,29.9471666666667
V
0,0.376701354980469
V
-1,0
BOT
0,29.9538333333333
V
0,0.375270843505859
V
-1,0
BOT
0,29.9605
V
0,0.374794006347656
V
-1,0
BOT
0,29.9671666666667
V
0,0.374794006347656
V
-1,0
BOT
0,29.9738333333333
V
0,0.375747680664062
V
-1,0
BOT
0,29.9805
V
0,0.377178192138672
V
-1,0
BOT
0,29.9871666666667
V
0,0.377655029296875
V
-1,0
BOT
0,29.9938333333333
V
0,0.378131866455078
V
-1,0
BOT
0,30.0005
V
0,0.379085540771484
V
-1,0
BOT
0,30.0071666666667
V
0,0.380516052246094
V
-1,0
BOT
0,30.0138333333333
V
0,0.3814697265625
V
-1,0
BOT
0,30.0205
V
0,0.382423400878906
V
-1,0
BOT
0,30.0271666666667
V
0,0.383377075195312
V
-1,0
BOT
0,30.0338333333333
V
0,0.383853912353516
V
-1,0
BOT
0,30.0405
V
0,0.383853912353516
V
-1,0
BOT
0,30.0471666666667
V
0,0.383853912353516
V
-1,0
BOT
0,30.0538333333333
V
0,0.383853912353516
V
-1,0
BOT
0,30.0605
V
0,0.383377075195312
V
-1,0
BOT
0,30.0671666666667
V
0,0.383853912353516
V
-1,0
BOT
0,30.0738333333333
V
0,0.384807586669922
V
-1,0
BOT
0,30.0805
V
0,0.386238098144531
V
-1,0
BOT
0,30.0871666666667
V
0,0.388622283935547
V
-1,0
BOT
0,30.0938333333333
V
0,0.392913818359375
V
-1,0
BOT
0,30.1005
V
0,0.398635864257812
V
-1,0
BOT
0,30.1071666666667
V
0,0.405311584472656
V
-1,0
BOT
0,30.1138333333333
V
0,0.4119873046875
V
-1,0
BOT
0,30.1205
V
0,0.418663024902344
V
-1,0
BOT
0,30.1271666666667
V
0,0.425815582275391
V
-1,0
BOT
0,30.1338333333333
V
0,0.434398651123047
V
-1,0
BOT
0,30.1405
V
0,0.444412231445313
V
-1,0
BOT
0,30.1471666666667
V
0,0.455856323242188
V
-1,0
BOT
0,30.1538333333333
V
0,0.469207763671875
V
-1,0
BOT
0,30.1605
V
0,0.485420227050781
V
-1,0
BOT
0,30.1671666666667
V
0,0.504970550537109
V
-1,0
BOT
0,30.1738333333333
V
0,0.526905059814453
V
-1,0
BOT
0,30.1805
V
0,0.550270080566406
V
-1,0
BOT
0,30.1871666666667
V
0,0.575542449951172
V
-1,0
BOT
0,30.1938333333333
V
0,0.604152679443359
V
-1,0
BOT
0,30.2005
V
0,0.635147094726563
V
-1,0
BOT
0,30.2071666666667
V
0,0.668525695800781
V
-1,0
BOT
0,30.2138333333333
V
0,0.702381134033203
V
-1,0
BOT
0,30.2205
V
0,0.737667083740234
V
-1,0
BOT
0,30.2271666666667
V
0,0.773429870605469
V
-1,0
BOT
0,30.2338333333333
V
0,0.809669494628906
V
-1,0
BOT
0,30.2405
V
0,0.84686279296875
V
-1,0
BOT
0,30.2471666666667
V
0,0.884056091308594
V
-1,0
BOT
0,30.2538333333333
V
0,0.921726226806641
V
-1,0
BOT
0,30.2605
V
0,0.959396362304688
V
-1,0
BOT
0,30.2671666666667
V
0,0.995635986328125
V
-1,0
BOT
0,30.2738333333333
V
0,1.02996826171875
V
-1,0
BOT
0,30.2805
V
0,1.06048583984375
V
-1,0
BOT
0,30.2871666666667
V
0,1.08766555786133
V
-1,0
BOT
0,30.2938333333333
V
0,1.11055374145508
V
-1,0
BOT
0,30.3005
V
0,1.129150390625
V
-1,0
BOT
0,30.3071666666667
V
0,1.14345550537109
V
-1,0
BOT
0,30.3138333333333
V
0,1.15203857421875
V
-1,0
BOT
0,30.3205
V
0,1.15633010864258
V
-1,0
BOT
0,30.3271666666667
V
0,1.15633010864258
V
-1,0
BOT
0,30.3338333333333
V
0,1.15251541137695
V
-1,0
BOT
0,30.3405
V
0,1.1444091796875
V
-1,0
BOT
0,30.3471666666667
V
0,1.13344192504883
V
-1,0
BOT
0,30.3538333333333
V
0,1.11865997314453
V
-1,0
BOT
0,30.3605
V
0,1.10101699829102
V
-1,0
BOT
0,30.3671666666667
V
0,1.07955932617187
V
-1,0
BOT
0,30.3738333333333
V
0,1.05476379394531
V
-1,0
BOT
0,30.3805
V
0,1.02663040161133
V
-1,0
BOT
0,30.3871666666667
V
0,0.997066497802734
V
-1,0
BOT
0,30.3938333333333
V
0,0.967979431152344
V
-1,0
BOT
0,30.4005
V
0,0.937938690185547
V
-1,0
BOT
0,30.4071666666667
V
0,0.907421112060547
V
-1,0
BOT
0,30.4138333333333
V
0,0.876426696777344
V
-1,0
BOT
0,30.4205
V
0,0.845432281494141
V
-1,0
BOT
0,30.4271666666667
V
0,0.814437866210938
V
-1,0
BOT
0,30.4338333333333
V
0,0.782489776611328
V
-1,0
BOT
0,30.4405
V
0,0.751495361328125
V
-1,0
BOT
0,30.4471666666667
V
0,0.722885131835938
V
-1,0
BOT
0,30.4538333333333
V
0,0.696182250976563
V
-1,0
BOT
0,30.4605
V
0,0.67138671875
V
-1,0
BOT
0,30.4671666666667
V
0,0.648021697998047
V
-1,0
BOT
0,30.4738333333333
V
0,0.627040863037109
V
-1,0
BOT
0,30.4805
V
0,0.607490539550781
V
-1,0
BOT
0,30.4871666666667
V
0,0.587940216064453
V
-1,0
BOT
0,30.4938333333333
V
0,0.568866729736328
V
-1,0
BOT
0,30.5005
V
0,0.551223754882813
V
-1,0
BOT
0,30.5071666666667
V
0,0.535011291503906
V
-1,0
BOT
0,30.5138333333333
V
0,0.520229339599609
V
-1,0
BOT
0,30.5205
V
0,0.506877899169922
V
-1,0
BOT
0,30.5271666666667
V
0,0.494956970214844
V
-1,0
BOT
0,30.5338333333333
V
0,0.484466552734375
V
-1,0
BOT
0,30.5405
V
0,0.473976135253906
V
-1,0
BOT
0,30.5471666666667
V
0,0.463962554931641
V
-1,0
BOT
0,30.5538333333333
V
0,0.453948974609375
V
-1,0
BOT
0,30.5605
V
0,0.443935394287109
V
-1,0
BOT
0,30.5671666666667
V
0,0.435829162597656
V
-1,0
BOT
0,30.5738333333333
V
0,0.429153442382813
V
-1,0
BOT
0,30.5805
V
0,0.423431396484375
V
-1,0
BOT
0,30.5871666666667
V
0,0.418186187744141
V
-1,0
BOT
0,30.5938333333333
V
0,0.412940979003906
V
-1,0
BOT
0,30.6005
V
0,0.407695770263672
V
-1,0
BOT
0,30.6071666666667
V
0,0.402450561523438
V
-1,0
BOT
0,30.6138333333333
V
0,0.396728515625
V
-1,0
BOT
0,30.6205
V
0,0.391483306884766
V
-1,0
BOT
0,30.6271666666667
V
0,0.387191772460937
V
-1,0
BOT
0,30.6338333333333
V
0,0.382423400878906
V
-1,0
BOT
0,30.6405
V
0,0.378608703613281
V
-1,0
BOT
0,30.6471666666667
V
0,0.374317169189453
V
-1,0
BOT
0,30.6538333333333
V
0,0.370502471923828
V
-1,0
BOT
0,30.6605
V
0,0.366687774658203
V
-1,0
BOT
0,30.6671666666667
V
0,0.363349914550781
V
-1,0
BOT
0,30.6738333333333
V
0,0.359535217285156
V
-1,0
BOT
0,30.6805
V
0,0.355720520019531
V
-1,0
BOT
0,30.6871666666667
V
0,0.351905822753906
V
-1,0
BOT
0,30.6938333333333
V
0,0.348091125488281
V
-1,0
BOT
0,30.7005
V
0,0.344753265380859
V
-1,0
BOT
0,30.7071666666667
V
0,0.341415405273437
V
-1,0
BOT
0,30.7138333333333
V
0,0.338554382324219
V
-1,0
BOT
0,30.7205
V
0,0.335216522216797
V
-1,0
BOT
0,30.7271666666667
V
0,0.332355499267578
V
-1,0
BOT
0,30.7338333333333
V
0,0.329971313476562
V
-1,0
BOT
0,30.7405
V
0,0.326633453369141
V
-1,0
BOT
0,30.7471666666667
V
0,0.323772430419922
V
-1,0
BOT
0,30.7538333333333
V
0,0.321388244628906
V
-1,0
BOT
0,30.7605
V
0,0.319004058837891
V
-1,0
BOT
0,30.7671666666667
V
0,0.316619873046875
V
-1,0
BOT
0,30.7738333333333
V
0,0.314235687255859
V
-1,0
BOT
0,30.7805
V
0,0.312328338623047
V
-1,0
BOT
0,30.7871666666667
V
0,0.309944152832031
V
-1,0
BOT
0,30.7938333333333
V
0,0.308036804199219
V
-1,0
BOT
0,30.8005
V
0,0.308036804199219
V
-1,0
BOT
0,30.8071666666667
V
0,0.308990478515625
V
-1,0
BOT
0,30.8138333333333
V
0,0.309944152832031
V
-1,0
BOT
0,30.8205
V
0,0.310420989990234
V
-1,0
BOT
0,30.8271666666667
V
0,0.308990478515625
V
-1,0
BOT
0,30.8338333333333
V
0,0.306606292724609
V
-1,0
BOT
0,30.8405
V
0,0.303268432617187
V
-1,0
BOT
0,30.8471666666667
V
0,0.299453735351562
V
-1,0
BOT
0,30.8538333333333
V
0,0.295639038085937
V
-1,0
BOT
0,30.8605
V
0,0.292301177978516
V
-1,0
BOT
0,30.8671666666667
V
0,0.290870666503906
V
-1,0
BOT
0,30.8738333333333
V
0,0.291824340820312
V
-1,0
BOT
0,30.8805
V
0,0.292778015136719
V
-1,0
BOT
0,30.8871666666667
V
0,0.293254852294922
V
-1,0
BOT
0,30.8938333333333
V
0,0.293254852294922
V
-1,0
BOT
0,30.9005
V
0,0.293731689453125
V
-1,0
BOT
0,30.9071666666667
V
0,0.293254852294922
V
-1,0
BOT
0,30.9138333333333
V
0,0.292301177978516
V
-1,0
BOT
0,30.9205
V
0,0.291347503662109
V
-1,0
BOT
0,30.9271666666667
V
0,0.290870666503906
V
-1,0
BOT
0,30.9338333333333
V
0,0.290393829345703
V
-1,0
BOT
0,30.9405
V
0,0.290393829345703
V
-1,0
BOT
0,30.9471666666667
V
0,0.290870666503906
V
-1,0
BOT
0,30.9538333333333
V
0,0.290870666503906
V
-1,0
BOT
0,30.9605
V
0,0.2899169921875
V
-1,0
BOT
0,30.9671666666667
V
0,0.288486480712891
V
-1,0
BOT
0,30.9738333333333
V
0,0.288009643554687
V
-1,0
BOT
0,30.9805
V
0,0.286579132080078
V
-1,0
BOT
0,30.9871666666667
V
0,0.285148620605469
V
-1,0
BOT
0,30.9938333333333
V
0,0.284194946289062
V
-1,0
BOT
0,31.0005
V
0,0.284671783447266
V
-1,0
BOT
0,31.0071666666667
V
0,0.285625457763672
V
-1,0
BOT
0,31.0138333333333
V
0,0.287055969238281
V
-1,0
BOT
0,31.0205
V
0,0.288486480712891
V
-1,0
BOT
0,31.0271666666667
V
0,0.290393829345703
V
-1,0
BOT
0,31.0338333333333
V
0,0.291824340820312
V
-1,0
BOT
0,31.0405
V
0,0.293254852294922
V
-1,0
BOT
0,31.0471666666667
V
0,0.294208526611328
V
-1,0
BOT
0,31.0538333333333
V
0,0.294208526611328
V
-1,0
BOT
0,31.0605
V
0,0.293731689453125
V
-1,0
BOT
0,31.0671666666667
V
0,0.292778015136719
V
-1,0
BOT
0,31.0738333333333
V
0,0.291347503662109
V
-1,0
BOT
0,31.0805
V
0,0.288963317871094
V
-1,0
BOT
0,31.0871666666667
V
0,0.286579132080078
V
-1,0
BOT
0,31.0938333333333
V
0,0.284671783447266
V
-1,0
BOT
0,31.1005
V
0,0.283241271972656
V
-1,0
BOT
0,31.1071666666667
V
0,0.281810760498047
V
-1,0
BOT
0,31.1138333333333
V
0,0.280857086181641
V
-1,0
BOT
0,31.1205
V
0,0.279903411865234
V
-1,0
BOT
0,31.1271666666667
V
0,0.279426574707031
V
-1,0
BOT
0,31.1338333333333
V
0,0.278949737548828
V
-1,0
BOT
0,31.1405
V
0,0.277519226074219
V
-1,0
BOT
0,31.1471666666667
V
0,0.275135040283203
V
-1,0
BOT
0,31.1538333333333
V
0,0.273227691650391
V
-1,0
BOT
0,31.1605
V
0,0.272750854492187
V
-1,0
BOT
0,31.1671666666667
V
0,0.272274017333984
V
-1,0
BOT
0,31.1738333333333
V
0,0.271797180175781
V
-1,0
BOT
0,31.1805
V
0,0.270843505859375
V
-1,0
BOT
0,31.1871666666667
V
0,0.270843505859375
V
-1,0
BOT
0,31.1938333333333
V
0,0.271320343017578
V
-1,0
BOT
0,31.2005
V
0,0.272274017333984
V
-1,0
BOT
0,31.2071666666667
V
0,0.273227691650391
V
-1,0
BOT
0,31.2138333333333
V
0,0.274658203125
V
-1,0
BOT
0,31.2205
V
0,0.276088714599609
V
-1,0
BOT
0,31.2271666666667
V
0,0.278472900390625
V
-1,0
BOT
0,31.2338333333333
V
0,0.282764434814453
V
-1,0
BOT
0,31.2405
V
0,0.288963317871094
V
-1,0
BOT
0,31.2471666666667
V
0,0.296115875244141
V
-1,0
BOT
0,31.2538333333333
V
0,0.304698944091797
V
-1,0
BOT
0,31.2605
V
0,0.314235687255859
V
-1,0
BOT
0,31.2671666666667
V
0,0.325679779052734
V
-1,0
BOT
0,31.2738333333333
V
0,0.338077545166016
V
-1,0
BOT
0,31.2805
V
0,0.349998474121094
V
-1,0
BOT
0,31.2871666666667
V
0,0.361919403076172
V
-1,0
BOT
0,31.2938333333333
V
0,0.376224517822266
V
-1,0
BOT
0,31.3005
V
0,0.392436981201172
V
-1,0
BOT
0,31.3071666666667
V
0,0.410079956054688
V
-1,0
BOT
0,31.3138333333333
V
0,0.427722930908203
V
-1,0
BOT
0,31.3205
V
0,0.445365905761719
V
-1,0
BOT
0,31.3271666666667
V
0,0.463008880615234
V
-1,0
BOT
0,31.3338333333333
V
0,0.482082366943359
V
-1,0
BOT
0,31.3405
V
0,0.501632690429688
V
-1,0
BOT
0,31.3471666666667
V
0,0.520229339599609
V
-1,0
BOT
0,31.3538333333333
V
0,0.538349151611328
V
-1,0
BOT
0,31.3605
V
0,0.557422637939453
V
-1,0
BOT
0,31.3671666666667
V
0,0.576019287109375
V
-1,0
BOT
0,31.3738333333333
V
0,0.594139099121094
V
-1,0
BOT
0,31.3805
V
0,0.610828399658203
V
-1,0
BOT
0,31.3871666666667
V
0,0.627040863037109
V
-1,0
BOT
0,31.3938333333333
V
0,0.642299652099609
V
-1,0
BOT
0,31.4005
V
0,0.655174255371094
V
-1,0
BOT
0,31.4071666666667
V
0,0.666618347167969
V
-1,0
BOT
0,31.4138333333333
V
0,0.676631927490234
V
-1,0
BOT
0,31.4205
V
0,0.684261322021484
V
-1,0
BOT
0,31.4271666666667
V
0,0.689029693603516
V
-1,0
BOT
0,31.4338333333333
V
0,0.691890716552734
V
-1,0
BOT
0,31.4405
V
0,0.691890716552734
V
-1,0
BOT
0,31.4471666666667
V
0,0.689506530761719
V
-1,0
BOT
0,31.4538333333333
V
0,0.685214996337891
V
-1,0
BOT
0,31.4605
V
0,0.67901611328125
V
-1,0
BOT
0,31.4671666666667
V
0,0.672340393066406
V
-1,0
BOT
0,31.4738333333333
V
0,0.664234161376953
V
-1,0
BOT
0,31.4805
V
0,0.654697418212891
V
-1,0
BOT
0,31.4871666666667
V
0,0.644207000732422
V
-1,0
BOT
0,31.4938333333333
V
0,0.632286071777344
V
-1,0
BOT
0,31.5005
V
0,0.61798095703125
V
-1,0
BOT
0,31.5071666666667
V
0,0.602245330810547
V
-1,0
BOT
0,31.5138333333333
V
0,0.585556030273438
V
-1,0
BOT
0,31.5205
V
0,0.568866729736328
V
-1,0
BOT
0,31.5271666666667
V
0,0.552177429199219
V
-1,0
BOT
0,31.5338333333333
V
0,0.535964965820313
V
-1,0
BOT
0,31.5405
V
0,0.520229339599609
V
-1,0
BOT
0,31.5471666666667
V
0,0.505447387695313
V
-1,0
BOT
0,31.5538333333333
V
0,0.492095947265625
V
-1,0
BOT
0,31.5605
V
0,0.478267669677734
V
-1,0
BOT
0,31.5671666666667
V
0,0.464439392089844
V
-1,0
BOT
0,31.5738333333333
V
0,0.450611114501953
V
-1,0
BOT
0,31.5805
V
0,0.436782836914063
V
-1,0
BOT
0,31.5871666666667
V
0,0.422000885009766
V
-1,0
BOT
0,31.5938333333333
V
0,0.407218933105469
V
-1,0
BOT
0,31.6005
V
0,0.393390655517578
V
-1,0
BOT
0,31.6071666666667
V
0,0.380992889404297
V
-1,0
BOT
0,31.6138333333333
V
0,0.370025634765625
V
-1,0
BOT
0,31.6205
V
0,0.360012054443359
V
-1,0
BOT
0,31.6271666666667
V
0,0.351905822753906
V
-1,0
BOT
0,31.6338333333333
V
0,0.346183776855469
V
-1,0
BOT
0,31.6405
V
0,0.340938568115234
V
-1,0
BOT
0,31.6471666666667
V
0,0.336647033691406
V
-1,0
BOT
0,31.6538333333333
V
0,0.332355499267578
V
-1,0
BOT
0,31.6605
V
0,0.329017639160156
V
-1,0
BOT
0,31.6671666666667
V
0,0.326633453369141
V
-1,0
BOT
0,31.6738333333333
V
0,0.324726104736328
V
-1,0
BOT
0,31.6805
V
0,0.322818756103516
V
-1,0
BOT
0,31.6871666666667
V
0,0.321865081787109
V
-1,0
BOT
0,31.6938333333333
V
0,0.321388244628906
V
-1,0
BOT
0,31.7005
V
0,0.321388244628906
V
-1,0
BOT
0,31.7071666666667
V
0,0.320911407470703
V
-1,0
BOT
0,31.7138333333333
V
0,0.321388244628906
V
-1,0
BOT
0,31.7205
V
0,0.321388244628906
V
-1,0
BOT
0,31.7271666666667
V
0,0.321388244628906
V
-1,0
BOT
0,31.7338333333333
V
0,0.321388244628906
V
-1,0
BOT
0,31.7405
V
0,0.322341918945312
V
-1,0
BOT
0,31.7471666666667
V
0,0.324726104736328
V
-1,0
BOT
0,31.7538333333333
V
0,0.328540802001953
V
-1,0
BOT
0,31.7605
V
0,0.332355499267578
V
-1,0
BOT
0,31.7671666666667
V
0,0.337600708007812
V
-1,0
BOT
0,31.7738333333333
V
0,0.342845916748047
V
-1,0
BOT
0,31.7805
V
0,0.346660614013672
V
-1,0
BOT
0,31.7871666666667
V
0,0.349521636962891
V
-1,0
BOT
0,31.7938333333333
V
0,0.3509521484375
V
-1,0
BOT
0,31.8005
V
0,0.351905822753906
V
-1,0
BOT
0,31.8071666666667
V
0,0.352382659912109
V
-1,0
BOT
0,31.8138333333333
V
0,0.352859497070312
V
-1,0
BOT
0,31.8205
V
0,0.353336334228516
V
-1,0
BOT
0,31.8271666666667
V
0,0.354290008544922
V
-1,0
BOT
0,31.8338333333333
V
0,0.355720520019531
V
-1,0
BOT
0,31.8405
V
0,0.357627868652344
V
-1,0
BOT
0,31.8471666666667
V
0,0.360012054443359
V
-1,0
BOT
0,31.8538333333333
V
0,0.361919403076172
V
-1,0
BOT
0,31.8605
V
0,0.363349914550781
V
-1,0
BOT
0,31.8671666666667
V
0,0.364303588867187
V
-1,0
BOT
0,31.8738333333333
V
0,0.363826751708984
V
-1,0
BOT
0,31.8805
V
0,0.362873077392578
V
-1,0
BOT
0,31.8871666666667
V
0,0.361442565917969
V
-1,0
BOT
0,31.8938333333333
V
0,0.360488891601562
V
-1,0
BOT
0,31.9005
V
0,0.360488891601562
V
-1,0
BOT
0,31.9071666666667
V
0,0.360965728759766
V
-1,0
BOT
0,31.9138333333333
V
0,0.360488891601562
V
-1,0
BOT
0,31.9205
V
0,0.360965728759766
V
-1,0
BOT
0,31.9271666666667
V
0,0.361442565917969
V
-1,0
BOT
0,31.9338333333333
V
0,0.362396240234375
V
-1,0
BOT
0,31.9405
V
0,0.363349914550781
V
-1,0
BOT
0,31.9471666666667
V
0,0.364303588867187
V
-1,0
BOT
0,31.9538333333333
V
0,0.364303588867187
V
-1,0
BOT
0,31.9605
V
0,0.364780426025391
V
-1,0
BOT
0,31.9671666666667
V
0,0.364303588867187
V
-1,0
BOT
0,31.9738333333333
V
0,0.363349914550781
V
-1,0
BOT
0,31.9805
V
0,0.361442565917969
V
-1,0
BOT
0,31.9871666666667
V
0,0.360012054443359
V
-1,0
BOT
0,31.9938333333333
V
0,0.359535217285156
V
-1,0
BOT
0,32.0005
V
0,0.359535217285156
V
-1,0
BOT
0,32.0071666666667
V
0,0.35858154296875
V
-1,0
BOT
0,32.0138333333333
V
0,0.357151031494141
V
-1,0
BOT
0,32.0205
V
0,0.355243682861328
V
-1,0
BOT
0,32.0271666666667
V
0,0.353336334228516
V
-1,0
BOT
0,32.0338333333333
V
0,0.3509521484375
V
-1,0
BOT
0,32.0405
V
0,0.348091125488281
V
-1,0
BOT
0,32.0471666666667
V
0,0.345706939697266
V
-1,0
BOT
0,32.0538333333333
V
0,0.342845916748047
V
-1,0
BOT
0,32.0605
V
0,0.338554382324219
V
-1,0
BOT
0,32.0671666666667
V
0,0.334262847900391
V
-1,0
BOT
0,32.0738333333333
V
0,0.329971313476562
V
-1,0
BOT
0,32.0805
V
0,0.326156616210937
V
-1,0
BOT
0,32.0871666666667
V
0,0.322341918945312
V
-1,0
BOT
0,32.0938333333333
V
0,0.317573547363281
V
-1,0
BOT
0,32.1005
V
0,0.31280517578125
V
-1,0
BOT
0,32.1071666666667
V
0,0.308513641357422
V
-1,0
BOT
0,32.1138333333333
V
0,0.304222106933594
V
-1,0
BOT
0,32.1205
V
0,0.299930572509766
V
-1,0
BOT
0,32.1271666666667
V
0,0.295639038085937
V
-1,0
BOT
0,32.1338333333333
V
0,0.291347503662109
V
-1,0
BOT
0,32.1405
V
0,0.288009643554687
V
-1,0
BOT
0,32.1471666666667
V
0,0.285625457763672
V
-1,0
BOT
0,32.1538333333333
V
0,0.282764434814453
V
-1,0
BOT
0,32.1605
V
0,0.279426574707031
V
-1,0
BOT
0,32.1671666666667
V
0,0.275611877441406
V
-1,0
BOT
0,32.1738333333333
V
0,0.271797180175781
V
-1,0
BOT
0,32.1805
V
0,0.269412994384766
V
-1,0
BOT
0,32.1871666666667
V
0,0.267982482910156
V
-1,0
BOT
0,32.1938333333333
V
0,0.266551971435547
V
-1,0
BOT
0,32.2005
V
0,0.265121459960937
V
-1,0
BOT
0,32.2071666666667
V
0,0.265121459960937
V
-1,0
BOT
0,32.2138333333333
V
0,0.264167785644531
V
-1,0
BOT
0,32.2205
V
0,0.262737274169922
V
-1,0
BOT
0,32.2271666666667
V
0,0.259876251220703
V
-1,0
BOT
0,32.2338333333333
V
0,0.257015228271484
V
-1,0
BOT
0,32.2405
V
0,0.253677368164062
V
-1,0
BOT
0,32.2471666666667
V
0,0.250816345214844
V
-1,0
BOT
0,32.2538333333333
V
0,0.249385833740234
V
-1,0
BOT
0,32.2605
V
0,0.248432159423828
V
-1,0
BOT
0,32.2671666666667
V
0,0.247955322265625
V
-1,0
BOT
0,32.2738333333333
V
0,0.247001647949219
V
-1,0
BOT
0,32.2805
V
0,0.247001647949219
V
-1,0
BOT
0,32.2871666666667
V
0,0.248432159423828
V
-1,0
BOT
0,32.2938333333333
V
0,0.250339508056641
V
-1,0
BOT
0,32.3005
V
0,0.252246856689453
V
-1,0
BOT
0,32.3071666666667
V
0,0.253677368164062
V
-1,0
BOT
0,32.3138333333333
V
0,0.256538391113281
V
-1,0
BOT
0,32.3205
V
0,0.260353088378906
V
-1,0
BOT
0,32.3271666666667
V
0,0.264644622802734
V
-1,0
BOT
0,32.3338333333333
V
0,0.269412994384766
V
-1,0
BOT
0,32.3405
V
0,0.275611877441406
V
-1,0
BOT
0,32.3471666666667
V
0,0.28228759765625
V
-1,0
BOT
0,32.3538333333333
V
0,0.288963317871094
V
-1,0
BOT
0,32.3605
V
0,0.294208526611328
V
-1,0
BOT
0,32.3671666666667
V
0,0.299453735351562
V
-1,0
BOT
0,32.3738333333333
V
0,0.304698944091797
V
-1,0
BOT
0,32.3805
V
0,0.309467315673828
V
-1,0
BOT
0,32.3871666666667
V
0,0.314712524414062
V
-1,0
BOT
0,32.3938333333333
V
0,0.320911407470703
V
-1,0
BOT
0,32.4005
V
0,0.328540802001953
V
-1,0
BOT
0,32.4071666666667
V
0,0.335693359375
V
-1,0
BOT
0,32.4138333333333
V
0,0.342369079589844
V
-1,0
BOT
0,32.4205
V
0,0.349044799804687
V
-1,0
BOT
0,32.4271666666667
V
0,0.355243682861328
V
-1,0
BOT
0,32.4338333333333
V
0,0.361919403076172
V
-1,0
BOT
0,32.4405
V
0,0.367641448974609
V
-1,0
BOT
0,32.4471666666667
V
0,0.37384033203125
V
-1,0
BOT
0,32.4538333333333
V
0,0.3814697265625
V
-1,0
BOT
0,32.4605
V
0,0.389575958251953
V
-1,0
BOT
0,32.4671666666667
V
0,0.396251678466797
V
-1,0
BOT
0,32.4738333333333
V
0,0.401496887207031
V
-1,0
BOT
0,32.4805
V
0,0.405311584472656
V
-1,0
BOT
0,32.4871666666667
V
0,0.407695770263672
V
-1,0
BOT
0,32.4938333333333
V
0,0.409126281738281
V
-1,0
BOT
0,32.5005
V
0,0.410079956054688
V
-1,0
BOT
0,32.5071666666667
V
0,0.411510467529297
V
-1,0
BOT
0,32.5138333333333
V
0,0.412464141845703
V
-1,0
BOT
0,32.5205
V
0,0.413894653320313
V
-1,0
BOT
0,32.5271666666667
V
0,0.414848327636719
V
-1,0
BOT
0,32.5338333333333
V
0,0.414371490478516
V
-1,0
BOT
0,32.5405
V
0,0.414371490478516
V
-1,0
BOT
0,32.5471666666667
V
0,0.414848327636719
V
-1,0
BOT
0,32.5538333333333
V
0,0.415802001953125
V
-1,0
BOT
0,32.5605
V
0,0.417232513427734
V
-1,0
BOT
0,32.5671666666667
V
0,0.418663024902344
V
-1,0
BOT
0,32.5738333333333
V
0,0.41961669921875
V
-1,0
BOT
0,32.5805
V
0,0.41961669921875
V
-1,0
BOT
0,32.5871666666667
V
0,0.417709350585938
V
-1,0
BOT
0,32.5938333333333
V
0,0.413894653320313
V
-1,0
BOT
0,32.6005
V
0,0.409603118896484
V
-1,0
BOT
0,32.6071666666667
V
0,0.40435791015625
V
-1,0
BOT
0,32.6138333333333
V
0,0.398635864257812
V
-1,0
BOT
0,32.6205
V
0,0.393390655517578
V
-1,0
BOT
0,32.6271666666667
V
0,0.388145446777344
V
-1,0
BOT
0,32.6338333333333
V
0,0.383377075195312
V
-1,0
BOT
0,32.6405
V
0,0.378608703613281
V
-1,0
BOT
0,32.6471666666667
V
0,0.373363494873047
V
-1,0
BOT
0,32.6538333333333
V
0,0.369548797607422
V
-1,0
BOT
0,32.6605
V
0,0.3662109375
V
-1,0
BOT
0,32.6671666666667
V
0,0.362396240234375
V
-1,0
BOT
0,32.6738333333333
V
0,0.358104705810547
V
-1,0
BOT
0,32.6805
V
0,0.352859497070312
V
-1,0
BOT
0,32.6871666666667
V
0,0.348091125488281
V
-1,0
BOT
0,32.6938333333333
V
0,0.342845916748047
V
-1,0
BOT
0,32.7005
V
0,0.338554382324219
V
-1,0
BOT
0,32.7071666666667
V
0,0.334739685058594
V
-1,0
BOT
0,32.7138333333333
V
0,0.331878662109375
V
-1,0
BOT
0,32.7205
V
0,0.329494476318359
V
-1,0
BOT
0,32.7271666666667
V
0,0.327587127685547
V
-1,0
BOT
0,32.7338333333333
V
0,0.325202941894531
V
-1,0
BOT
0,32.7405
V
0,0.322818756103516
V
-1,0
BOT
0,32.7471666666667
V
0,0.319480895996094
V
-1,0
BOT
0,32.7538333333333
V
0,0.316143035888672
V
-1,0
BOT
0,32.7605
V
0,0.314235687255859
V
-1,0
BOT
0,32.7671666666667
V
0,0.31280517578125
V
-1,0
BOT
0,32.7738333333333
V
0,0.310420989990234
V
-1,0
BOT
0,32.7805
V
0,0.307083129882812
V
-1,0
BOT
0,32.7871666666667
V
0,0.302791595458984
V
-1,0
BOT
0,32.7938333333333
V
0,0.29754638671875
V
-1,0
BOT
0,32.8005
V
0,0.291824340820312
V
-1,0
BOT
0,32.8071666666667
V
0,0.287055969238281
V
-1,0
BOT
0,32.8138333333333
V
0,0.283241271972656
V
-1,0
BOT
0,32.8205
V
0,0.279903411865234
V
-1,0
BOT
0,32.8271666666667
V
0,0.277042388916016
V
-1,0
BOT
0,32.8338333333333
V
0,0.274658203125
V
-1,0
BOT
0,32.8405
V
0,0.272274017333984
V
-1,0
BOT
0,32.8471666666667
V
0,0.268936157226562
V
-1,0
BOT
0,32.8538333333333
V
0,0.265598297119141
V
-1,0
BOT
0,32.8605
V
0,0.260829925537109
V
-1,0
BOT
0,32.8671666666667
V
0,0.256061553955078
V
-1,0
BOT
0,32.8738333333333
V
0,0.250816345214844
V
-1,0
BOT
0,32.8805
V
0,0.246047973632812
V
-1,0
BOT
0,32.8871666666667
V
0,0.240325927734375
V
-1,0
BOT
0,32.8938333333333
V
0,0.235080718994141
V
-1,0
BOT
0,32.9005
V
0,0.230789184570312
V
-1,0
BOT
0,32.9071666666667
V
0,0.227928161621094
V
-1,0
BOT
0,32.9138333333333
V
0,0.226020812988281
V
-1,0
BOT
0,32.9205
V
0,0.224113464355469
V
-1,0
BOT
0,32.9271666666667
V
0,0.221729278564453
V
-1,0
BOT
0,32.9338333333333
V
0,0.219345092773437
V
-1,0
BOT
0,32.9405
V
0,0.216960906982422
V
-1,0
BOT
0,32.9471666666667
V
0,0.214099884033203
V
-1,0
BOT
0,32.9538333333333
V
0,0.211715698242187
V
-1,0
BOT
0,32.9605
V
0,0.210762023925781
V
-1,0
BOT
0,32.9671666666667
V
0,0.210285186767578
V
-1,0
BOT
0,32.9738333333333
V
0,0.209331512451172
V
-1,0
BOT
0,32.9805
V
0,0.207901000976562
V
-1,0
BOT
0,32.9871666666667
V
0,0.206470489501953
V
-1,0
BOT
0,32.9938333333333
V
0,0.205039978027344
V
-1,0
BOT
0,33.0005
V
0,0.203609466552734
V
-1,0
BOT
0,33.0071666666667
V
0,0.202178955078125
V
-1,0
BOT
0,33.0138333333333
V
0,0.201702117919922
V
-1,0
BOT
0,33.0205
V
0,0.201225280761719
V
-1,0
BOT
0,33.0271666666667
V
0,0.200748443603516
V
-1,0
BOT
0,33.0338333333333
V
0,0.199317932128906
V
-1,0
BOT
0,33.0405
V
0,0.197410583496094
V
-1,0
BOT
0,33.0471666666667
V
0,0.195026397705078
V
-1,0
BOT
0,33.0538333333333
V
0,0.192642211914062
V
-1,0
BOT
0,33.0605
V
0,0.19073486328125
V
-1,0
BOT
0,33.0671666666667
V
0,0.189304351806641
V
-1,0
BOT
0,33.0738333333333
V
0,0.188350677490234
V
-1,0
BOT
0,33.0805
V
0,0.187397003173828
V
-1,0
BOT
0,33.0871666666667
V
0,0.186443328857422
V
-1,0
BOT
0,33.0938333333333
V
0,0.185012817382812
V
-1,0
BOT
0,33.1005
V
0,0.184059143066406
V
-1,0
BOT
0,33.1071666666667
V
0,0.182151794433594
V
-1,0
BOT
0,33.1138333333333
V
0,0.180721282958984
V
-1,0
BOT
0,33.1205
V
0,0.179290771484375
V
-1,0
BOT
0,33.1271666666667
V
0,0.178813934326172
V
-1,0
BOT
0,33.1338333333333
V
0,0.177383422851562
V
-1,0
BOT
0,33.1405
V
0,0.17547607421875
V
-1,0
BOT
0,33.1471666666667
V
0,0.173568725585937
V
-1,0
BOT
0,33.1538333333333
V
0,0.171184539794922
V
-1,0
BOT
0,33.1605
V
0,0.168800354003906
V
-1,0
BOT
0,33.1671666666667
V
0,0.165462493896484
V
-1,0
BOT
0,33.1738333333333
V
0,0.163078308105469
V
-1,0
BOT
0,33.1805
V
0,0.161647796630859
V
-1,0
BOT
0,33.1871666666667
V
0,0.160694122314453
V
-1,0
BOT
0,33.1938333333333
V
0,0.159263610839844
V
-1,0
BOT
0,33.2005
V
0,0.158309936523437
V
-1,0
BOT
0,33.2071666666667
V
0,0.157356262207031
V
-1,0
BOT
0,33.2138333333333
V
0,0.155925750732422
V
-1,0
BOT
0,33.2205
V
0,0.155448913574219
V
-1,0
BOT
0,33.2271666666667
V
0,0.154495239257812
V
-1,0
BOT
0,33.2338333333333
V
0,0.153541564941406
V
-1,0
BOT
0,33.2405
V
0,0.153064727783203
V
-1,0
BOT
0,33.2471666666667
V
0,0.154018402099609
V
-1,0
BOT
0,33.2538333333333
V
0,0.154972076416016
V
-1,0
BOT
0,33.2605
V
0,0.155448913574219
V
-1,0
BOT
0,33.2671666666667
V
0,0.155448913574219
V
-1,0
BOT
0,33.2738333333333
V
0,0.156879425048828
V
-1,0
BOT
0,33.2805
V
0,0.158309936523437
V
-1,0
BOT
0,33.2871666666667
V
0,0.159740447998047
V
-1,0
BOT
0,33.2938333333333
V
0,0.161170959472656
V
-1,0
BOT
0,33.3005
V
0,0.162124633789062
V
-1,0
BOT
0,33.3071666666667
V
0,0.164508819580078
V
-1,0
BOT
0,33.3138333333333
V
0,0.1678466796875
V
-1,0
BOT
0,33.3205
V
0,0.171184539794922
V
-1,0
BOT
0,33.3271666666667
V
0,0.174999237060547
V
-1,0
BOT
0,33.3338333333333
V
0,0.178337097167969
V
-1,0
BOT
0,33.3405
V
0,0.181198120117187
V
-1,0
BOT
0,33.3471666666667
V
0,0.183582305908203
V
-1,0
BOT
0,33.3538333333333
V
0,0.185489654541016
V
-1,0
BOT
0,33.3605
V
0,0.187397003173828
V
-1,0
BOT
0,33.3671666666667
V
0,0.189781188964844
V
-1,0
BOT
0,33.3738333333333
V
0,0.192642211914062
V
-1,0
BOT
0,33.3805
V
0,0.195980072021484
V
-1,0
BOT
0,33.3871666666667
V
0,0.200271606445312
V
-1,0
BOT
0,33.3938333333333
V
0,0.205516815185547
V
-1,0
BOT
0,33.4005
V
0,0.210762023925781
V
-1,0
BOT
0,33.4071666666667
V
0,0.216007232666016
V
-1,0
BOT
0,33.4138333333333
V
0,0.22125244140625
V
-1,0
BOT
0,33.4205
V
0,0.226974487304687
V
-1,0
BOT
0,33.4271666666667
V
0,0.232219696044922
V
-1,0
BOT
0,33.4338333333333
V
0,0.236988067626953
V
-1,0
BOT
0,33.4405
V
0,0.240802764892578
V
-1,0
BOT
0,33.4471666666667
V
0,0.244140625
V
-1,0
BOT
0,33.4538333333333
V
0,0.248432159423828
V
-1,0
BOT
0,33.4605
V
0,0.253677368164062
V
-1,0
BOT
0,33.4671666666667
V
0,0.259876251220703
V
-1,0
BOT
0,33.4738333333333
V
0,0.266075134277344
V
-1,0
BOT
0,33.4805
V
0,0.271797180175781
V
-1,0
BOT
0,33.4871666666667
V
0,0.277996063232422
V
-1,0
BOT
0,33.4938333333333
V
0,0.284671783447266
V
-1,0
BOT
0,33.5005
V
0,0.291824340820312
V
-1,0
BOT
0,33.5071666666667
V
0,0.298500061035156
V
-1,0
BOT
0,33.5138333333333
V
0,0.304222106933594
V
-1,0
BOT
0,33.5205
V
0,0.309944152832031
V
-1,0
BOT
0,33.5271666666667
V
0,0.315189361572266
V
-1,0
BOT
0,33.5338333333333
V
0,0.319957733154297
V
-1,0
BOT
0,33.5405
V
0,0.322341918945312
V
-1,0
BOT
0,33.5471666666667
V
0,0.324249267578125
V
-1,0
BOT
0,33.5538333333333
V
0,0.326633453369141
V
-1,0
BOT
0,33.5605
V
0,0.329017639160156
V
-1,0
BOT
0,33.5671666666667
V
0,0.331401824951172
V
-1,0
BOT
0,33.5738333333333
V
0,0.332832336425781
V
-1,0
BOT
0,33.5805
V
0,0.333786010742187
V
-1,0
BOT
0,33.5871666666667
V
0,0.335216522216797
V
-1,0
BOT
0,33.5938333333333
V
0,0.335693359375
V
-1,0
BOT
0,33.6005
V
0,0.336170196533203
V
-1,0
BOT
0,33.6071666666667
V
0,0.335693359375
V
-1,0
BOT
0,33.6138333333333
V
0,0.335693359375
V
-1,0
BOT
0,33.6205
V
0,0.335693359375
V
-1,0
BOT
0,33.6271666666667
V
0,0.335216522216797
V
-1,0
BOT
0,33.6338333333333
V
0,0.334739685058594
V
-1,0
BOT
0,33.6405
V
0,0.334262847900391
V
-1,0
BOT
0,33.6471666666667
V
0,0.332355499267578
V
-1,0
BOT
0,33.6538333333333
V
0,0.329971313476562
V
-1,0
BOT
0,33.6605
V
0,0.326633453369141
V
-1,0
BOT
0,33.6671666666667
V
0,0.322818756103516
V
-1,0
BOT
0,33.6738333333333
V
0,0.318527221679687
V
-1,0
BOT
0,33.6805
V
0,0.314235687255859
V
-1,0
BOT
0,33.6871666666667
V
0,0.310420989990234
V
-1,0
BOT
0,33.6938333333333
V
0,0.308036804199219
V
-1,0
BOT
0,33.7005
V
0,0.306606292724609
V
-1,0
BOT
0,33.7071666666667
V
0,0.304222106933594
V
-1,0
BOT
0,33.7138333333333
V
0,0.300884246826172
V
-1,0
BOT
0,33.7205
V
0,0.297069549560547
V
-1,0
BOT
0,33.7271666666667
V
0,0.292778015136719
V
-1,0
BOT
0,33.7338333333333
V
0,0.287532806396484
V
-1,0
BOT
0,33.7405
V
0,0.280857086181641
V
-1,0
BOT
0,33.7471666666667
V
0,0.275135040283203
V
-1,0
BOT
0,33.7538333333333
V
0,0.271797180175781
V
-1,0
BOT
0,33.7605
V
0,0.269412994384766
V
-1,0
BOT
0,33.7671666666667
V
0,0.267505645751953
V
-1,0
BOT
0,33.7738333333333
V
0,0.266075134277344
V
-1,0
BOT
0,33.7805
V
0,0.266075134277344
V
-1,0
BOT
0,33.7871666666667
V
0,0.267982482910156
V
-1,0
BOT
0,33.7938333333333
V
0,0.271320343017578
V
-1,0
BOT
0,33.8005
V
0,0.275135040283203
V
-1,0
BOT
0,33.8071666666667
V
0,0.279426574707031
V
-1,0
BOT
0,33.8138333333333
V
0,0.285148620605469
V
-1,0
BOT
0,33.8205
V
0,0.292301177978516
V
-1,0
BOT
0,33.8271666666667
V
0,0.299453735351562
V
-1,0
BOT
0,33.8338333333333
V
0,0.308036804199219
V
-1,0
BOT
0,33.8405
V
0,0.318527221679687
V
-1,0
BOT
0,33.8471666666667
V
0,0.332355499267578
V
-1,0
BOT
0,33.8538333333333
V
0,0.349521636962891
V
-1,0
BOT
0,33.8605
V
0,0.369071960449219
V
-1,0
BOT
0,33.8671666666667
V
0,0.391960144042969
V
-1,0
BOT
0,33.8738333333333
V
0,0.417232513427734
V
-1,0
BOT
0,33.8805
V
0,0.445842742919922
V
-1,0
BOT
0,33.8871666666667
V
0,0.477790832519531
V
-1,0
BOT
0,33.8938333333333
V
0,0.512599945068359
V
-1,0
BOT
0,33.9005
V
0,0.550270080566406
V
-1,0
BOT
0,33.9071666666667
V
0,0.591754913330078
V
-1,0
BOT
0,33.9138333333333
V
0,0.636577606201172
V
-1,0
BOT
0,33.9205
V
0,0.684261322021484
V
-1,0
BOT
0,33.9271666666667
V
0,0.735759735107422
V
-1,0
BOT
0,33.9338333333333
V
0,0.791549682617188
V
-1,0
BOT
0,33.9405
V
0,0.851631164550781
V
-1,0
BOT
0,33.9471666666667
V
0,0.916481018066406
V
-1,0
BOT
0,33.9538333333333
V
0,0.986576080322266
V
-1,0
BOT
0,33.9605
V
0,1.06191635131836
V
-1,0
BOT
0,33.9671666666667
V
0,1.14154815673828
V
-1,0
BOT
0,33.9738333333333
V
0,1.22499465942383
V
-1,0
BOT
0,33.9805
V
0,1.31130218505859
V
-1,0
BOT
0,33.9871666666667
V
0,1.40094757080078
V
-1,0
BOT
0,33.9938333333333
V
0,1.49440765380859
V
-1,0
BOT
0,34.0005
V
0,1.59025192260742
V
-1,0
BOT
0,34.0071666666667
V
0,1.68895721435547
V
-1,0
BOT
0,34.0138333333333
V
0,1.79052352905273
V
-1,0
BOT
0,34.0205
V
0,1.89638137817383
V
-1,0
BOT
0,34.0271666666667
V
0,2.00510025024414
V
-1,0
BOT
0,34.0338333333333
V
0,2.11620330810547
V
-1,0
BOT
0,34.0405
V
0,2.22969055175781
V
-1,0
BOT
0,34.0471666666667
V
0,2.34460830688477
V
-1,0
BOT
0,34.0538333333333
V
0,2.46095657348633
V
-1,0
BOT
0,34.0605
V
0,2.5782585144043
V
-1,0
BOT
0,34.0671666666667
V
0,2.69651412963867
V
-1,0
BOT
0,34.0738333333333
V
0,2.81476974487305
V
-1,0
BOT
0,34.0805
V
0,2.93350219726562
V
-1,0
BOT
0,34.0871666666667
V
0,3.05271148681641
V
-1,0
BOT
0,34.0938333333333
V
0,3.17144393920898
V
-1,0
BOT
0,34.1005
V
0,3.28874588012695
V
-1,0
BOT
0,34.1071666666667
V
0,3.4027099609375
V
-1,0
BOT
0,34.1138333333333
V
0,3.51333618164062
V
-1,0
BOT
0,34.1205
V
0,3.61919403076172
V
-1,0
BOT
0,34.1271666666667
V
0,3.72028350830078
V
-1,0
BOT
0,34.1338333333333
V
0,3.81565093994141
V
-1,0
BOT
0,34.1405
V
0,3.90481948852539
V
-1,0
BOT
0,34.1471666666667
V
0,3.98683547973633
V
-1,0
BOT
0,34.1538333333333
V
0,4.06217575073242
V
-1,0
BOT
0,34.1605
V
0,4.12940979003906
V
-1,0
BOT
0,34.1671666666667
V
0,4.18710708618164
V
-1,0
BOT
0,34.1738333333333
V
0,4.23479080200195
V
-1,0
BOT
0,34.1805
V
0,4.2724609375
V
-1,0
BOT
0,34.1871666666667
V
0,4.29916381835938
V
-1,0
BOT
0,34.1938333333333
V
0,4.31442260742188
V
-1,0
BOT
0,34.2005
V
0,4.3187141418457
V
-1,0
BOT
0,34.2071666666667
V
0,4.31251525878906
V
-1,0
BOT
0,34.2138333333333
V
0,4.29630279541016
V
-1,0
BOT
0,34.2205
V
0,4.26959991455078
V
-1,0
BOT
0,34.2271666666667
V
0,4.23336029052734
V
-1,0
BOT
0,34.2338333333333
V
0,4.18853759765625
V
-1,0
BOT
0,34.2405
V
0,4.13608551025391
V
-1,0
BOT
0,34.2471666666667
V
0,4.07600402832031
V
-1,0
BOT
0,34.2538333333333
V
0,4.00781631469727
V
-1,0
BOT
0,34.2605
V
0,3.93295288085937
V
-1,0
BOT
0,34.2671666666667
V
0,3.85189056396484
V
-1,0
BOT
0,34.2738333333333
V
0,3.76558303833008
V
-1,0
BOT
0,34.2805
V
0,3.67259979248047
V
-1,0
BOT
0,34.2871666666667
V
0,3.57532501220703
V
-1,0
BOT
0,34.2938333333333
V
0,3.47566604614258
V
-1,0
BOT
0,34.3005
V
0,3.37409973144531
V
-1,0
BOT
0,34.3071666666667
V
0,3.27205657958984
V
-1,0
BOT
0,34.3138333333333
V
0,3.16953659057617
V
-1,0
BOT
0,34.3205
V
0,3.0674934387207
V
-1,0
BOT
0,34.3271666666667
V
0,2.96545028686523
V
-1,0
BOT
0,34.3338333333333
V
0,2.86245346069336
V
-1,0
BOT
0,34.3405
V
0,2.75850296020508
V
-1,0
BOT
0,34.3471666666667
V
0,2.6545524597168
V
-1,0
BOT
0,34.3538333333333
V
0,2.55298614501953
V
-1,0
BOT
0,34.3605
V
0,2.45332717895508
V
-1,0
BOT
0,34.3671666666667
V
0,2.35605239868164
V
-1,0
BOT
0,34.3738333333333
V
0,2.26116180419922
V
-1,0
BOT
0,34.3805
V
0,2.16865539550781
V
-1,0
BOT
0,34.3871666666667
V
0,2.07710266113281
V
-1,0
BOT
0,34.3938333333333
V
0,1.98602676391602
V
-1,0
BOT
0,34.4005
V
0,1.89685821533203
V
-1,0
BOT
0,34.4071666666667
V
0,1.81007385253906
V
-1,0
BOT
0,34.4138333333333
V
0,1.72662734985352
V
-1,0
BOT
0,34.4205
V
0,1.64508819580078
V
-1,0
BOT
0,34.4271666666667
V
0,1.56641006469727
V
-1,0
BOT
0,34.4338333333333
V
0,1.48868560791016
V
-1,0
BOT
0,34.4405
V
0,1.41334533691406
V
-1,0
BOT
0,34.4471666666667
V
0,1.33895874023437
V
-1,0
BOT
0,34.4538333333333
V
0,1.2664794921875
V
-1,0
BOT
0,34.4605
V
0,1.19733810424805
V
-1,0
BOT
0,34.4671666666667
V
0,1.13153457641602
V
-1,0
BOT
0,34.4738333333333
V
0,1.0685920715332
V
-1,0
BOT
0,34.4805
V
0,1.00851058959961
V
-1,0
BOT
0,34.4871666666667
V
0,0.952243804931641
V
-1,0
BOT
0,34.4938333333333
V
0,0.898838043212891
V
-1,0
BOT
0,34.5005
V
0,0.847816467285156
V
-1,0
BOT
0,34.5071666666667
V
0,0.799179077148438
V
-1,0
BOT
0,34.5138333333333
V
0,0.753879547119141
V
-1,0
BOT
0,34.5205
V
0,0.710487365722656
V
-1,0
BOT
0,34.5271666666667
V
0,0.669002532958984
V
-1,0
BOT
0,34.5338333333333
V
0,0.629425048828125
V
-1,0
BOT
0,34.5405
V
0,0.591754913330078
V
-1,0
BOT
0,34.5471666666667
V
0,0.555992126464844
V
-1,0
BOT
0,34.5538333333333
V
0,0.521659851074219
V
-1,0
BOT
0,34.5605
V
0,0.489711761474609
V
-1,0
BOT
0,34.5671666666667
V
0,0.460624694824219
V
-1,0
BOT
0,34.5738333333333
V
0,0.43487548828125
V
-1,0
BOT
0,34.5805
V
0,0.411033630371094
V
-1,0
BOT
0,34.5871666666667
V
0,0.38909912109375
V
-1,0
BOT
0,34.5938333333333
V
0,0.369071960449219
V
-1,0
BOT
0,34.6005
V
0,0.3509521484375
V
-1,0
BOT
0,34.6071666666667
V
0,0.334739685058594
V
-1,0
BOT
0,34.6138333333333
V
0,0.319480895996094
V
-1,0
BOT
0,34.6205
V
0,0.304698944091797
V
-1,0
BOT
0,34.6271666666667
V
0,0.291347503662109
V
-1,0
BOT
0,34.6338333333333
V
0,0.279426574707031
V
-1,0
BOT
0,34.6405
V
0,0.268936157226562
V
-1,0
BOT
0,34.6471666666667
V
0,0.2593994140625
V
-1,0
BOT
0,34.6538333333333
V
0,0.249862670898437
V
-1,0
BOT
0,34.6605
V
0,0.240802764892578
V
-1,0
BOT
0,34.6671666666667
V
0,0.233650207519531
V
-1,0
BOT
0,34.6738333333333
V
0,0.227928161621094
V
-1,0
BOT
0,34.6805
V
0,0.222206115722656
V
-1,0
BOT
0,34.6871666666667
V
0,0.216484069824219
V
-1,0
BOT
0,34.6938333333333
V
0,0.211238861083984
V
-1,0
BOT
0,34.7005
V
0,0.207424163818359
V
-1,0
BOT
0,34.7071666666667
V
0,0.205039978027344
V
-1,0
BOT
0,34.7138333333333
V
0,0.201702117919922
V
-1,0
BOT
0,34.7205
V
0,0.197410583496094
V
-1,0
BOT
0,34.7271666666667
V
0,0.192642211914062
V
-1,0
BOT
0,34.7338333333333
V
0,0.188350677490234
V
-1,0
BOT
0,34.7405
V
0,0.185012817382812
V
-1,0
BOT
0,34.7471666666667
V
0,0.182628631591797
V
-1,0
BOT
0,34.7538333333333
V
0,0.181674957275391
V
-1,0
BOT
0,34.7605
V
0,0.181674957275391
V
-1,0
BOT
0,34.7671666666667
V
0,0.18310546875
V
-1,0
BOT
0,34.7738333333333
V
0,0.184535980224609
V
-1,0
BOT
0,34.7805
V
0,0.185012817382812
V
-1,0
BOT
0,34.7871666666667
V
0,0.184059143066406
V
-1,0
BOT
0,34.7938333333333
V
0,0.182151794433594
V
-1,0
BOT
0,34.8005
V
0,0.179767608642578
V
-1,0
BOT
0,34.8071666666667
V
0,0.176906585693359
V
-1,0
BOT
0,34.8138333333333
V
0,0.174999237060547
V
-1,0
BOT
0,34.8205
V
0,0.174045562744141
V
-1,0
BOT
0,34.8271666666667
V
0,0.173091888427734
V
-1,0
BOT
0,34.8338333333333
V
0,0.172138214111328
V
-1,0
BOT
0,34.8405
V
0,0.170707702636719
V
-1,0
BOT
0,34.8471666666667
V
0,0.170230865478516
V
-1,0
BOT
0,34.8538333333333
V
0,0.169754028320312
V
-1,0
BOT
0,34.8605
V
0,0.168800354003906
V
-1,0
BOT
0,34.8671666666667
V
0,0.168323516845703
V
-1,0
BOT
0,34.8738333333333
V
0,0.168323516845703
V
-1,0
BOT
0,34.8805
V
0,0.169277191162109
V
-1,0
BOT
0,34.8871666666667
V
0,0.170230865478516
V
-1,0
BOT
0,34.8938333333333
V
0,0.171184539794922
V
-1,0
BOT
0,34.9005
V
0,0.172138214111328
V
-1,0
BOT
0,34.9071666666667
V
0,0.173091888427734
V
-1,0
BOT
0,34.9138333333333
V
0,0.173568725585937
V
-1,0
BOT
0,34.9205
V
0,0.174999237060547
V
-1,0
BOT
0,34.9271666666667
V
0,0.176429748535156
V
-1,0
BOT
0,34.9338333333333
V
0,0.177860260009766
V
-1,0
BOT
0,34.9405
V
0,0.180244445800781
V
-1,0
BOT
0,34.9471666666667
V
0,0.18310546875
V
-1,0
BOT
0,34.9538333333333
V
0,0.186443328857422
V
-1,0
BOT
0,34.9605
V
0,0.190258026123047
V
-1,0
BOT
0,34.9671666666667
V
0,0.194072723388672
V
-1,0
BOT
0,34.9738333333333
V
0,0.1983642578125
V
-1,0
BOT
0,34.9805
V
0,0.202178955078125
V
-1,0
BOT
0,34.9871666666667
V
0,0.206947326660156
V
-1,0
BOT
0,34.9938333333333
V
0,0.212192535400391
V
-1,0
BOT
0,35.0005
V
0,0.217437744140625
V
-1,0
BOT
0,35.0071666666667
V
0,0.223159790039062
V
-1,0
BOT
0,35.0138333333333
V
0,0.229358673095703
V
-1,0
BOT
0,35.0205
V
0,0.235080718994141
V
-1,0
BOT
0,35.0271666666667
V
0,0.240325927734375
V
-1,0
BOT
0,35.0338333333333
V
0,0.245094299316406
V
-1,0
BOT
0,35.0405
V
0,0.250339508056641
V
-1,0
BOT
0,35.0471666666667
V
0,0.255584716796875
V
-1,0
BOT
0,35.0538333333333
V
0,0.260829925537109
V
-1,0
BOT
0,35.0605
V
0,0.26702880859375
V
-1,0
BOT
0,35.0671666666667
V
0,0.273227691650391
V
-1,0
BOT
0,35.0738333333333
V
0,0.278949737548828
V
-1,0
BOT
0,35.0805
V
0,0.284194946289062
V
-1,0
BOT
0,35.0871666666667
V
0,0.288486480712891
V
-1,0
BOT
0,35.0938333333333
V
0,0.290393829345703
V
-1,0
BOT
0,35.1005
V
0,0.291824340820312
V
-1,0
BOT
0,35.1071666666667
V
0,0.292301177978516
V
-1,0
BOT
0,35.1138333333333
V
0,0.293254852294922
V
-1,0
BOT
0,35.1205
V
0,0.294208526611328
V
-1,0
BOT
0,35.1271666666667
V
0,0.296115875244141
V
-1,0
BOT
0,35.1338333333333
V
0,0.298023223876953
V
-1,0
BOT
0,35.1405
V
0,0.299453735351562
V
-1,0
BOT
0,35.1471666666667
V
0,0.300884246826172
V
-1,0
BOT
0,35.1538333333333
V
0,0.301361083984375
V
-1,0
BOT
0,35.1605
V
0,0.300884246826172
V
-1,0
BOT
0,35.1671666666667
V
0,0.298976898193359
V
-1,0
BOT
0,35.1738333333333
V
0,0.297069549560547
V
-1,0
BOT
0,35.1805
V
0,0.295639038085937
V
-1,0
BOT
0,35.1871666666667
V
0,0.295639038085937
V
-1,0
BOT
0,35.1938333333333
V
0,0.295162200927734
V
-1,0
BOT
0,35.2005
V
0,0.294685363769531
V
-1,0
BOT
0,35.2071666666667
V
0,0.292778015136719
V
-1,0
BOT
0,35.2138333333333
V
0,0.290393829345703
V
-1,0
BOT
0,35.2205
V
0,0.287055969238281
V
-1,0
BOT
0,35.2271666666667
V
0,0.282764434814453
V
-1,0
BOT
0,35.2338333333333
V
0,0.277996063232422
V
-1,0
BOT
0,35.2405
V
0,0.272750854492187
V
-1,0
BOT
0,35.2471666666667
V
0,0.268459320068359
V
-1,0
BOT
0,35.2538333333333
V
0,0.265598297119141
V
-1,0
BOT
0,35.2605
V
0,0.262260437011719
V
-1,0
BOT
0,35.2671666666667
V
0,0.258922576904297
V
-1,0
BOT
0,35.2738333333333
V
0,0.255584716796875
V
-1,0
BOT
0,35.2805
V
0,0.252723693847656
V
-1,0
BOT
0,35.2871666666667
V
0,0.250816345214844
V
-1,0
BOT
0,35.2938333333333
V
0,0.248908996582031
V
-1,0
BOT
0,35.3005
V
0,0.246047973632812
V
-1,0
BOT
0,35.3071666666667
V
0,0.243663787841797
V
-1,0
BOT
0,35.3138333333333
V
0,0.241279602050781
V
-1,0
BOT
0,35.3205
V
0,0.237941741943359
V
-1,0
BOT
0,35.3271666666667
V
0,0.233650207519531
V
-1,0
BOT
0,35.3338333333333
V
0,0.229835510253906
V
-1,0
BOT
0,35.3405
V
0,0.226020812988281
V
-1,0
BOT
0,35.3471666666667
V
0,0.222682952880859
V
-1,0
BOT
0,35.3538333333333
V
0,0.218868255615234
V
-1,0
BOT
0,35.3605
V
0,0.216007232666016
V
-1,0
BOT
0,35.3671666666667
V
0,0.213146209716797
V
-1,0
BOT
0,35.3738333333333
V
0,0.210285186767578
V
-1,0
BOT
0,35.3805
V
0,0.207424163818359
V
-1,0
BOT
0,35.3871666666667
V
0,0.20599365234375
V
-1,0
BOT
0,35.3938333333333
V
0,0.205039978027344
V
-1,0
BOT
0,35.4005
V
0,0.203132629394531
V
-1,0
BOT
0,35.4071666666667
V
0,0.200748443603516
V
-1,0
BOT
0,35.4138333333333
V
0,0.198841094970703
V
-1,0
BOT
0,35.4205
V
0,0.197887420654297
V
-1,0
BOT
0,35.4271666666667
V
0,0.195980072021484
V
-1,0
BOT
0,35.4338333333333
V
0,0.194549560546875
V
-1,0
BOT
0,35.4405
V
0,0.194072723388672
V
-1,0
BOT
0,35.4471666666667
V
0,0.195026397705078
V
-1,0
BOT
0,35.4538333333333
V
0,0.195503234863281
V
-1,0
BOT
0,35.4605
V
0,0.194549560546875
V
-1,0
BOT
0,35.4671666666667
V
0,0.192642211914062
V
-1,0
BOT
0,35.4738333333333
V
0,0.190258026123047
V
-1,0
BOT
0,35.4805
V
0,0.188350677490234
V
-1,0
BOT
0,35.4871666666667
V
0,0.186920166015625
V
-1,0
BOT
0,35.4938333333333
V
0,0.185966491699219
V
-1,0
BOT
0,35.5005
V
0,0.185489654541016
V
-1,0
BOT
0,35.5071666666667
V
0,0.186443328857422
V
-1,0
BOT
0,35.5138333333333
V
0,0.187873840332031
V
-1,0
BOT
0,35.5205
V
0,0.188827514648437
V
-1,0
BOT
0,35.5271666666667
V
0,0.187397003173828
V
-1,0
BOT
0,35.5338333333333
V
0,0.185489654541016
V
-1,0
BOT
0,35.5405
V
0,0.18310546875
V
-1,0
BOT
0,35.5471666666667
V
0,0.181198120117187
V
-1,0
BOT
0,35.5538333333333
V
0,0.179767608642578
V
-1,0
BOT
0,35.5605
V
0,0.177383422851562
V
-1,0
BOT
0,35.5671666666667
V
0,0.176429748535156
V
-1,0
BOT
0,35.5738333333333
V
0,0.175952911376953
V
-1,0
BOT
0,35.5805
V
0,0.17547607421875
V
-1,0
BOT
0,35.5871666666667
V
0,0.174522399902344
V
-1,0
BOT
0,35.5938333333333
V
0,0.173568725585937
V
-1,0
BOT
0,35.6005
V
0,0.172138214111328
V
-1,0
BOT
0,35.6071666666667
V
0,0.170707702636719
V
-1,0
BOT
0,35.6138333333333
V
0,0.168800354003906
V
-1,0
BOT
0,35.6205
V
0,0.167369842529297
V
-1,0
BOT
0,35.6271666666667
V
0,0.166416168212891
V
-1,0
BOT
0,35.6338333333333
V
0,0.165939331054687
V
-1,0
BOT
0,35.6405
V
0,0.165939331054687
V
-1,0
BOT
0,35.6471666666667
V
0,0.166416168212891
V
-1,0
BOT
0,35.6538333333333
V
0,0.1678466796875
V
-1,0
BOT
0,35.6605
V
0,0.1678466796875
V
-1,0
BOT
0,35.6671666666667
V
0,0.166416168212891
V
-1,0
BOT
0,35.6738333333333
V
0,0.164985656738281
V
-1,0
BOT
0,35.6805
V
0,0.164031982421875
V
-1,0
BOT
0,35.6871666666667
V
0,0.164031982421875
V
-1,0
BOT
0,35.6938333333333
V
0,0.164508819580078
V
-1,0
BOT
0,35.7005
V
0,0.164985656738281
V
-1,0
BOT
0,35.7071666666667
V
0,0.166416168212891
V
-1,0
BOT
0,35.7138333333333
V
0,0.1678466796875
V
-1,0
BOT
0,35.7205
V
0,0.168800354003906
V
-1,0
BOT
0,35.7271666666667
V
0,0.169277191162109
V
-1,0
BOT
0,35.7338333333333
V
0,0.169754028320312
V
-1,0
BOT
0,35.7405
V
0,0.170707702636719
V
-1,0
BOT
0,35.7471666666667
V
0,0.171184539794922
V
-1,0
BOT
0,35.7538333333333
V
0,0.171661376953125
V
-1,0
BOT
0,35.7605
V
0,0.171184539794922
V
-1,0
BOT
0,35.7671666666667
V
0,0.171184539794922
V
-1,0
BOT
0,35.7738333333333
V
0,0.170230865478516
V
-1,0
BOT
0,35.7805
V
0,0.169277191162109
V
-1,0
BOT
0,35.7871666666667
V
0,0.168323516845703
V
-1,0
BOT
0,35.7938333333333
V
0,0.168323516845703
V
-1,0
BOT
0,35.8005
V
0,0.168323516845703
V
-1,0
BOT
0,35.8071666666667
V
0,0.168800354003906
V
-1,0
BOT
0,35.8138333333333
V
0,0.169754028320312
V
-1,0
BOT
0,35.8205
V
0,0.170230865478516
V
-1,0
BOT
0,35.8271666666667
V
0,0.170230865478516
V
-1,0
BOT
0,35.8338333333333
V
0,0.169754028320312
V
-1,0
BOT
0,35.8405
V
0,0.169277191162109
V
-1,0
BOT
0,35.8471666666667
V
0,0.168323516845703
V
-1,0
BOT
0,35.8538333333333
V
0,0.168800354003906
V
-1,0
BOT
0,35.8605
V
0,0.169754028320312
V
-1,0
BOT
0,35.8671666666667
V
0,0.170230865478516
V
-1,0
BOT
0,35.8738333333333
V
0,0.171184539794922
V
-1,0
BOT
0,35.8805
V
0,0.171661376953125
V
-1,0
BOT
0,35.8871666666667
V
0,0.172615051269531
V
-1,0
BOT
0,35.8938333333333
V
0,0.174045562744141
V
-1,0
BOT
0,35.9005
V
0,0.174999237060547
V
-1,0
BOT
0,35.9071666666667
V
0,0.176429748535156
V
-1,0
BOT
0,35.9138333333333
V
0,0.178337097167969
V
-1,0
BOT
0,35.9205
V
0,0.179767608642578
V
-1,0
BOT
0,35.9271666666667
V
0,0.181674957275391
V
-1,0
BOT
0,35.9338333333333
V
0,0.182628631591797
V
-1,0
BOT
0,35.9405
V
0,0.184059143066406
V
-1,0
BOT
0,35.9471666666667
V
0,0.186443328857422
V
-1,0
BOT
0,35.9538333333333
V
0,0.189781188964844
V
-1,0
BOT
0,35.9605
V
0,0.192165374755859
V
-1,0
BOT
0,35.9671666666667
V
0,0.193595886230469
V
-1,0
BOT
0,35.9738333333333
V
0,0.195026397705078
V
-1,0
BOT
0,35.9805
V
0,0.197410583496094
V
-1,0
BOT
0,35.9871666666667
V
0,0.198841094970703
V
-1,0
BOT
0,35.9938333333333
V
0,0.200748443603516
V
-1,0
BOT
0,36.0005
V
0,0.203132629394531
V
-1,0
BOT
0,36.0071666666667
V
0,0.206947326660156
V
-1,0
BOT
0,36.0138333333333
V
0,0.209808349609375
V
-1,0
BOT
0,36.0205
V
0,0.212669372558594
V
-1,0
BOT
0,36.0271666666667
V
0,0.215530395507812
V
-1,0
BOT
0,36.0338333333333
V
0,0.218391418457031
V
-1,0
BOT
0,36.0405
V
0,0.22125244140625
V
-1,0
BOT
0,36.0471666666667
V
0,0.224590301513672
V
-1,0
BOT
0,36.0538333333333
V
0,0.228404998779297
V
-1,0
BOT
0,36.0605
V
0,0.232696533203125
V
-1,0
BOT
0,36.0671666666667
V
0,0.237464904785156
V
-1,0
BOT
0,36.0738333333333
V
0,0.241756439208984
V
-1,0
BOT
0,36.0805
V
0,0.245571136474609
V
-1,0
BOT
0,36.0871666666667
V
0,0.248908996582031
V
-1,0
BOT
0,36.0938333333333
V
0,0.25177001953125
V
-1,0
BOT
0,36.1005
V
0,0.253677368164062
V
-1,0
BOT
0,36.1071666666667
V
0,0.255107879638672
V
-1,0
BOT
0,36.1138333333333
V
0,0.256061553955078
V
-1,0
BOT
0,36.1205
V
0,0.255107879638672
V
-1,0
BOT
0,36.1271666666667
V
0,0.254154205322266
V
-1,0
BOT
0,36.1338333333333
V
0,0.252723693847656
V
-1,0
BOT
0,36.1405
V
0,0.251293182373047
V
-1,0
BOT
0,36.1471666666667
V
0,0.250816345214844
V
-1,0
BOT
0,36.1538333333333
V
0,0.250816345214844
V
-1,0
BOT
0,36.1605
V
0,0.252246856689453
V
-1,0
BOT
0,36.1671666666667
V
0,0.253677368164062
V
-1,0
BOT
0,36.1738333333333
V
0,0.254631042480469
V
-1,0
BOT
0,36.1805
V
0,0.254154205322266
V
-1,0
BOT
0,36.1871666666667
V
0,0.252723693847656
V
-1,0
BOT
0,36.1938333333333
V
0,0.250816345214844
V
-1,0
BOT
0,36.2005
V
0,0.247955322265625
V
-1,0
BOT
0,36.2071666666667
V
0,0.246047973632812
V
-1,0
BOT
0,36.2138333333333
V
0,0.244140625
V
-1,0
BOT
0,36.2205
V
0,0.242233276367187
V
-1,0
BOT
0,36.2271666666667
V
0,0.240325927734375
V
-1,0
BOT
0,36.2338333333333
V
0,0.237464904785156
V
-1,0
BOT
0,36.2405
V
0,0.235080718994141
V
-1,0
BOT
0,36.2471666666667
V
0,0.232219696044922
V
-1,0
BOT
0,36.2538333333333
V
0,0.229358673095703
V
-1,0
BOT
0,36.2605
V
0,0.227451324462891
V
-1,0
BOT
0,36.2671666666667
V
0,0.227451324462891
V
-1,0
BOT
0,36.2738333333333
V
0,0.227928161621094
V
-1,0
BOT
0,36.2805
V
0,0.227928161621094
V
-1,0
BOT
0,36.2871666666667
V
0,0.226020812988281
V
-1,0
BOT
0,36.2938333333333
V
0,0.224113464355469
V
-1,0
BOT
0,36.3005
V
0,0.222682952880859
V
-1,0
BOT
0,36.3071666666667
V
0,0.220298767089844
V
-1,0
BOT
0,36.3138333333333
V
0,0.217914581298828
V
-1,0
BOT
0,36.3205
V
0,0.216007232666016
V
-1,0
BOT
0,36.3271666666667
V
0,0.215053558349609
V
-1,0
BOT
0,36.3338333333333
V
0,0.215530395507812
V
-1,0
BOT
0,36.3405
V
0,0.215053558349609
V
-1,0
BOT
0,36.3471666666667
V
0,0.214099884033203
V
-1,0
BOT
0,36.3538333333333
V
0,0.212192535400391
V
-1,0
BOT
0,36.3605
V
0,0.210762023925781
V
-1,0
BOT
0,36.3671666666667
V
0,0.209808349609375
V
-1,0
BOT
0,36.3738333333333
V
0,0.207901000976562
V
-1,0
BOT
0,36.3805
V
0,0.205039978027344
V
-1,0
BOT
0,36.3871666666667
V
0,0.203132629394531
V
-1,0
BOT
0,36.3938333333333
V
0,0.201225280761719
V
-1,0
BOT
0,36.4005
V
0,0.199317932128906
V
-1,0
BOT
0,36.4071666666667
V
0,0.196456909179687
V
-1,0
BOT
0,36.4138333333333
V
0,0.193119049072266
V
-1,0
BOT
0,36.4205
V
0,0.189781188964844
V
-1,0
BOT
0,36.4271666666667
V
0,0.186920166015625
V
-1,0
BOT
0,36.4338333333333
V
0,0.185012817382812
V
-1,0
BOT
0,36.4405
V
0,0.18310546875
V
-1,0
BOT
0,36.4471666666667
V
0,0.180721282958984
V
-1,0
BOT
0,36.4538333333333
V
0,0.179290771484375
V
-1,0
BOT
0,36.4605
V
0,0.178813934326172
V
-1,0
BOT
0,36.4671666666667
V
0,0.178337097167969
V
-1,0
BOT
0,36.4738333333333
V
0,0.176429748535156
V
-1,0
BOT
0,36.4805
V
0,0.174045562744141
V
-1,0
BOT
0,36.4871666666667
V
0,0.171184539794922
V
-1,0
BOT
0,36.4938333333333
V
0,0.166893005371094
V
-1,0
BOT
0,36.5005
V
0,0.161647796630859
V
-1,0
BOT
0,36.5071666666667
V
0,0.156879425048828
V
-1,0
BOT
0,36.5138333333333
V
0,0.153064727783203
V
-1,0
BOT
0,36.5205
V
0,0.150203704833984
V
-1,0
BOT
0,36.5271666666667
V
0,0.147819519042969
V
-1,0
BOT
0,36.5338333333333
V
0,0.145912170410156
V
-1,0
BOT
0,36.5405
V
0,0.144481658935547
V
-1,0
BOT
0,36.5471666666667
V
0,0.141620635986328
V
-1,0
BOT
0,36.5538333333333
V
0,0.137805938720703
V
-1,0
BOT
0,36.5605
V
0,0.133514404296875
V
-1,0
BOT
0,36.5671666666667
V
0,0.129222869873047
V
-1,0
BOT
0,36.5738333333333
V
0,0.124931335449219
V
-1,0
BOT
0,36.5805
V
0,0.120162963867187
V
-1,0
BOT
0,36.5871666666667
V
0,0.116348266601562
V
-1,0
BOT
0,36.5938333333333
V
0,0.113487243652344
V
-1,0
BOT
0,36.6005
V
0,0.110626220703125
V
-1,0
BOT
0,36.6071666666667
V
0,0.107765197753906
V
-1,0
BOT
0,36.6138333333333
V
0,0.104427337646484
V
-1,0
BOT
0,36.6205
V
0,0.101566314697266
V
-1,0
BOT
0,36.6271666666667
V
0,0.0977516174316406
V
-1,0
BOT
0,36.6338333333333
V
0,0.0944137573242188
V
-1,0
BOT
0,36.6405
V
0,0.091552734375
V
-1,0
BOT
0,36.6471666666667
V
0,0.0905990600585938
V
-1,0
BOT
0,36.6538333333333
V
0,0.0905990600585938
V
-1,0
BOT
0,36.6605
V
0,0.0896453857421875
V
-1,0
BOT
0,36.6671666666667
V
0,0.0891685485839844
V
-1,0
BOT
0,36.6738333333333
V
0,0.0891685485839844
V
-1,0
BOT
0,36.6805
V
0,0.0886917114257813
V
-1,0
BOT
0,36.6871666666667
V
0,0.087738037109375
V
-1,0
BOT
0,36.6938333333333
V
0,0.0858306884765625
V
-1,0
BOT
0,36.7005
V
0,0.0848770141601563
V
-1,0
BOT
0,36.7071666666667
V
0,0.0844001770019531
V
-1,0
BOT
0,36.7138333333333
V
0,0.08392333984375
V
-1,0
BOT
0,36.7205
V
0,0.08392333984375
V
-1,0
BOT
0,36.7271666666667
V
0,0.08392333984375
V
-1,0
BOT
0,36.7338333333333
V
0,0.0853538513183594
V
-1,0
BOT
0,36.7405
V
0,0.0863075256347656
V
-1,0
BOT
0,36.7471666666667
V
0,0.0882148742675781
V
-1,0
BOT
0,36.7538333333333
V
0,0.0910758972167969
V
-1,0
BOT
0,36.7605
V
0,0.0944137573242188
V
-1,0
BOT
0,36.7671666666667
V
0,0.0967979431152344
V
-1,0
BOT
0,36.7738333333333
V
0,0.09918212890625
V
-1,0
BOT
0,36.7805
V
0,0.102996826171875
V
-1,0
BOT
0,36.7871666666667
V
0,0.1068115234375
V
-1,0
BOT
0,36.7938333333333
V
0,0.109195709228516
V
-1,0
BOT
0,36.8005
V
0,0.111579895019531
V
-1,0
BOT
0,36.8071666666667
V
0,0.113487243652344
V
-1,0
BOT
0,36.8138333333333
V
0,0.115394592285156
V
-1,0
BOT
0,36.8205
V
0,0.116348266601562
V
-1,0
BOT
0,36.8271666666667
V
0,0.116825103759766
V
-1,0
BOT
0,36.8338333333333
V
0,0.118255615234375
V
-1,0
BOT
0,36.8405
V
0,0.120639801025391
V
-1,0
BOT
0,36.8471666666667
V
0,0.123977661132812
V
-1,0
BOT
0,36.8538333333333
V
0,0.127792358398437
V
-1,0
BOT
0,36.8605
V
0,0.131607055664062
V
-1,0
BOT
0,36.8671666666667
V
0,0.136375427246094
V
-1,0
BOT
0,36.8738333333333
V
0,0.140190124511719
V
-1,0
BOT
0,36.8805
V
0,0.143051147460937
V
-1,0
BOT
0,36.8871666666667
V
0,0.145435333251953
V
-1,0
BOT
0,36.8938333333333
V
0,0.146865844726562
V
-1,0
BOT
0,36.9005
V
0,0.148296356201172
V
-1,0
BOT
0,36.9071666666667
V
0,0.148773193359375
V
-1,0
BOT
0,36.9138333333333
V
0,0.149250030517578
V
-1,0
BOT
0,36.9205
V
0,0.149250030517578
V
-1,0
BOT
0,36.9271666666667
V
0,0.148296356201172
V
-1,0
BOT
0,36.9338333333333
V
0,0.146865844726562
V
-1,0
BOT
0,36.9405
V
0,0.146389007568359
V
-1,0
BOT
0,36.9471666666667
V
0,0.146389007568359
V
-1,0
BOT
0,36.9538333333333
V
0,0.14495849609375
V
-1,0
BOT
0,36.9605
V
0,0.143051147460937
V
-1,0
BOT
0,36.9671666666667
V
0,0.140190124511719
V
-1,0
BOT
0,36.9738333333333
V
0,0.1373291015625
V
-1,0
BOT
0,36.9805
V
0,0.133991241455078
V
-1,0
BOT
0,36.9871666666667
V
0,0.130653381347656
V
-1,0
BOT
0,36.9938333333333
V
0,0.128746032714844
V
-1,0
BOT
0,37.0005
V
0,0.126838684082031
V
-1,0
BOT
0,37.0071666666667
V
0,0.125408172607422
V
-1,0
BOT
0,37.0138333333333
V
0,0.123500823974609
V
-1,0
BOT
0,37.0205
V
0,0.120639801025391
V
-1,0
BOT
0,37.0271666666667
V
0,0.116825103759766
V
-1,0
BOT
0,37.0338333333333
V
0,0.112533569335937
V
-1,0
BOT
0,37.0405
V
0,0.107765197753906
V
-1,0
BOT
0,37.0471666666667
V
0,0.103473663330078
V
-1,0
BOT
0,37.0538333333333
V
0,0.100135803222656
V
-1,0
BOT
0,37.0605
V
0,0.0972747802734375
V
-1,0
BOT
0,37.0671666666667
V
0,0.0944137573242188
V
-1,0
BOT
0,37.0738333333333
V
0,0.0910758972167969
V
-1,0
BOT
0,37.0805
V
0,0.0882148742675781
V
-1,0
BOT
0,37.0871666666667
V
0,0.0853538513183594
V
-1,0
BOT
0,37.0938333333333
V
0,0.0829696655273438
V
-1,0
BOT
0,37.1005
V
0,0.0796318054199219
V
-1,0
BOT
0,37.1071666666667
V
0,0.0767707824707031
V
-1,0
BOT
0,37.1138333333333
V
0,0.0739097595214844
V
-1,0
BOT
0,37.1205
V
0,0.0705718994140625
V
-1,0
BOT
0,37.1271666666667
V
0,0.0672340393066406
V
-1,0
BOT
0,37.1338333333333
V
0,0.0634193420410156
V
-1,0
BOT
0,37.1405
V
0,0.0596046447753906
V
-1,0
BOT
0,37.1471666666667
V
0,0.0553131103515625
V
-1,0
BOT
0,37.1538333333333
V
0,0.0510215759277344
V
-1,0
BOT
0,37.1605
V
0,0.0476837158203125
V
-1,0
BOT
0,37.1671666666667
V
0,0.0452995300292969
V
-1,0
BOT
0,37.1738333333333
V
0,0.0448226928710938
V
-1,0
BOT
0,37.1805
V
0,0.0443458557128906
V
-1,0
BOT
0,37.1871666666667
V
0,0.0433921813964844
V
-1,0
BOT
0,37.1938333333333
V
0,0.0429153442382813
V
-1,0
BOT
0,37.2005
V
0,0.0424385070800781
V
-1,0
BOT
0,37.2071666666667
V
0,0.0410079956054688
V
-1,0
BOT
0,37.2138333333333
V
0,0.03814697265625
V
-1,0
BOT
0,37.2205
V
0,0.0352859497070312
V
-1,0
BOT
0,37.2271666666667
V
0,0.0324249267578125
V
-1,0
BOT
0,37.2338333333333
V
0,0.030517578125
V
-1,0
BOT
0,37.2405
V
0,0.0290870666503906
V
-1,0
BOT
0,37.2471666666667
V
0,0.0271797180175781
V
-1,0
BOT
0,37.2538333333333
V
0,0.0247955322265625
V
-1,0
BOT
0,37.2605
V
0,0.0233650207519531
V
-1,0
BOT
0,37.2671666666667
V
0,0.0219345092773437
V
-1,0
BOT
0,37.2738333333333
V
0,0.0205039978027344
V
-1,0
BOT
0,37.2805
V
0,0.0195503234863281
V
-1,0
BOT
0,37.2871666666667
V
0,0.019073486328125
V
-1,0
BOT
0,37.2938333333333
V
0,0.019073486328125
V
-1,0
BOT
0,37.3005
V
0,0.019073486328125
V
-1,0
BOT
0,37.3071666666667
V
0,0.0200271606445312
V
-1,0
BOT
0,37.3138333333333
V
0,0.0205039978027344
V
-1,0
BOT
0,37.3205
V
0,0.0200271606445312
V
-1,0
BOT
0,37.3271666666667
V
0,0.0195503234863281
V
-1,0
BOT
0,37.3338333333333
V
0,0.019073486328125
V
-1,0
BOT
0,37.3405
V
0,0.0185966491699219
V
-1,0
BOT
0,37.3471666666667
V
0,0.0181198120117187
V
-1,0
BOT
0,37.3538333333333
V
0,0.0181198120117187
V
-1,0
BOT
0,37.3605
V
0,0.0185966491699219
V
-1,0
BOT
0,37.3671666666667
V
0,0.019073486328125
V
-1,0
BOT
0,37.3738333333333
V
0,0.0195503234863281
V
-1,0
BOT
0,37.3805
V
0,0.0205039978027344
V
-1,0
BOT
0,37.3871666666667
V
0,0.0200271606445312
V
-1,0
BOT
0,37.3938333333333
V
0,0.0185966491699219
V
-1,0
BOT
0,37.4005
V
0,0.0176429748535156
V
-1,0
BOT
0,37.4071666666667
V
0,0.0162124633789062
V
-1,0
BOT
0,37.4138333333333
V
0,0.0152587890625
V
-1,0
BOT
0,37.4205
V
0,0.0152587890625
V
-1,0
BOT
0,37.4271666666667
V
0,0.0162124633789062
V
-1,0
BOT
0,37.4338333333333
V
0,0.0176429748535156
V
-1,0
BOT
0,37.4405
V
0,0.0205039978027344
V
-1,0
BOT
0,37.4471666666667
V
0,0.0233650207519531
V
-1,0
BOT
0,37.4538333333333
V
0,0.0276565551757812
V
-1,0
BOT
0,37.4605
V
0,0.0324249267578125
V
-1,0
BOT
0,37.4671666666667
V
0,0.0357627868652344
V
-1,0
BOT
0,37.4738333333333
V
0,0.0391006469726562
V
-1,0
BOT
0,37.4805
V
0,0.0414848327636719
V
-1,0
BOT
0,37.4871666666667
V
0,0.041961669921875
V
-1,0
BOT
0,37.4938333333333
V
0,0.041961669921875
V
-1,0
BOT
0,37.5005
V
0,0.0410079956054688
V
-1,0
BOT
0,37.5071666666667
V
0,0.0410079956054688
V
-1,0
BOT
0,37.5138333333333
V
0,0.0414848327636719
V
-1,0
BOT
0,37.5205
V
0,0.041961669921875
V
-1,0
BOT
0,37.5271666666667
V
0,0.0433921813964844
V
-1,0
BOT
0,37.5338333333333
V
0,0.0448226928710938
V
-1,0
BOT
0,37.5405
V
0,0.0462532043457031
V
-1,0
BOT
0,37.5471666666667
V
0,0.0472068786621094
V
-1,0
BOT
0,37.5538333333333
V
0,0.0481605529785156
V
-1,0
BOT
0,37.5605
V
0,0.049591064453125
V
-1,0
BOT
0,37.5671666666667
V
0,0.0514984130859375
V
-1,0
BOT
0,37.5738333333333
V
0,0.05340576171875
V
-1,0
BOT
0,37.5805
V
0,0.0548362731933594
V
-1,0
BOT
0,37.5871666666667
V
0,0.0553131103515625
V
-1,0
BOT
0,37.5938333333333
V
0,0.0557899475097656
V
-1,0
BOT
0,37.6005
V
0,0.057220458984375
V
-1,0
BOT
0,37.6071666666667
V
0,0.0591278076171875
V
-1,0
BOT
0,37.6138333333333
V
0,0.0629425048828125
V
-1,0
BOT
0,37.6205
V
0,0.0667572021484375
V
-1,0
BOT
0,37.6271666666667
V
0,0.0715255737304688
V
-1,0
BOT
0,37.6338333333333
V
0,0.0767707824707031
V
-1,0
BOT
0,37.6405
V
0,0.0824928283691406
V
-1,0
BOT
0,37.6471666666667
V
0,0.0882148742675781
V
-1,0
BOT
0,37.6538333333333
V
0,0.0944137573242188
V
-1,0
BOT
0,37.6605
V
0,0.102043151855469
V
-1,0
BOT
0,37.6671666666667
V
0,0.110626220703125
V
-1,0
BOT
0,37.6738333333333
V
0,0.121593475341797
V
-1,0
BOT
0,37.6805
V
0,0.133991241455078
V
-1,0
BOT
0,37.6871666666667
V
0,0.147819519042969
V
-1,0
BOT
0,37.6938333333333
V
0,0.162124633789062
V
-1,0
BOT
0,37.7005
V
0,0.179767608642578
V
-1,0
BOT
0,37.7071666666667
V
0,0.202178955078125
V
-1,0
BOT
0,37.7138333333333
V
0,0.228404998779297
V
-1,0
BOT
0,37.7205
V
0,0.258922576904297
V
-1,0
BOT
0,37.7271666666667
V
0,0.293254852294922
V
-1,0
BOT
0,37.7338333333333
V
0,0.333786010742187
V
-1,0
BOT
0,37.7405
V
0,0.378608703613281
V
-1,0
BOT
0,37.7471666666667
V
0,0.426769256591797
V
-1,0
BOT
0,37.7538333333333
V
0,0.481128692626953
V
-1,0
BOT
0,37.7605
V
0,0.54168701171875
V
-1,0
BOT
0,37.7671666666667
V
0,0.608921051025391
V
-1,0
BOT
0,37.7738333333333
V
0,0.683307647705078
V
-1,0
BOT
0,37.7805
V
0,0.765323638916016
V
-1,0
BOT
0,37.7871666666667
V
0,0.855922698974609
V
-1,0
BOT
0,37.7938333333333
V
0,0.954151153564453
V
-1,0
BOT
0,37.8005
V
0,1.06000900268555
V
-1,0
BOT
0,37.8071666666667
V
0,1.1744499206543
V
-1,0
BOT
0,37.8138333333333
V
0,1.2974739074707
V
-1,0
BOT
0,37.8205
V
0,1.42908096313477
V
-1,0
BOT
0,37.8271666666667
V
0,1.56927108764648
V
-1,0
BOT
0,37.8338333333333
V
0,1.71852111816406
V
-1,0
BOT
0,37.8405
V
0,1.8768310546875
V
-1,0
BOT
0,37.8471666666667
V
0,2.04324722290039
V
-1,0
BOT
0,37.8538333333333
V
0,2.21729278564453
V
-1,0
BOT
0,37.8605
V
0,2.39658355712891
V
-1,0
BOT
0,37.8671666666667
V
0,2.58159637451172
V
-1,0
BOT
0,37.8738333333333
V
0,2.77090072631836
V
-1,0
BOT
0,37.8805
V
0,2.96449661254883
V
-1,0
BOT
0,37.8871666666667
V
0,3.16143035888672
V
-1,0
BOT
0,37.8938333333333
V
0,3.36170196533203
V
-1,0
BOT
0,37.9005
V
0,3.56388092041016
V
-1,0
BOT
0,37.9071666666667
V
0,3.76605987548828
V
-1,0
BOT
0,37.9138333333333
V
0,3.96633148193359
V
-1,0
BOT
0,37.9205
V
0,4.16326522827148
V
-1,0
BOT
0,37.9271666666667
V
0,4.35543060302734
V
-1,0
BOT
0,37.9338333333333
V
0,4.54187393188477
V
-1,0
BOT
0,37.9405
V
0,4.72116470336914
V
-1,0
BOT
0,37.9471666666667
V
0,4.89187240600586
V
-1,0
BOT
0,37.9538333333333
V
0,5.05256652832031
V
-1,0
BOT
0,37.9605
V
0,5.20086288452148
V
-1,0
BOT
0,37.9671666666667
V
0,5.33676147460938
V
-1,0
BOT
0,37.9738333333333
V
0,5.45883178710938
V
-1,0
BOT
0,37.9805
V
0,5.56612014770508
V
-1,0
BOT
0,37.9871666666667
V
0,5.65624237060547
V
-1,0
BOT
0,37.9938333333333
V
0,5.73062896728516
V
-1,0
BOT
0,38.0005
V
0,5.78832626342773
V
-1,0
BOT
0,38.0071666666667
V
0,5.8283805847168
V
-1,0
BOT
0,38.0138333333333
V
0,5.85031509399414
V
-1,0
BOT
0,38.0205
V
0,5.85412979125977
V
-1,0
BOT
0,38.0271666666667
V
0,5.84030151367188
V
-1,0
BOT
0,38.0338333333333
V
0,5.80835342407227
V
-1,0
BOT
0,38.0405
V
0,5.75923919677734
V
-1,0
BOT
0,38.0471666666667
V
0,5.6920051574707
V
-1,0
BOT
0,38.0538333333333
V
0,5.60903549194336
V
-1,0
BOT
0,38.0605
V
0,5.51176071166992
V
-1,0
BOT
0,38.0671666666667
V
0,5.4020881652832
V
-1,0
BOT
0,38.0738333333333
V
0,5.28049468994141
V
-1,0
BOT
0,38.0805
V
0,5.14888763427734
V
-1,0
BOT
0,38.0871666666667
V
0,5.00774383544922
V
-1,0
BOT
0,38.0938333333333
V
0,4.85849380493164
V
-1,0
BOT
0,38.1005
V
0,4.70304489135742
V
-1,0
BOT
0,38.1071666666667
V
0,4.54187393188477
V
-1,0
BOT
0,38.1138333333333
V
0,4.37641143798828
V
-1,0
BOT
0,38.1205
V
0,4.20713424682617
V
-1,0
BOT
0,38.1271666666667
V
0,4.03547286987305
V
-1,0
BOT
0,38.1338333333333
V
0,3.86190414428711
V
-1,0
BOT
0,38.1405
V
0,3.68881225585937
V
-1,0
BOT
0,38.1471666666667
V
0,3.51715087890625
V
-1,0
BOT
0,38.1538333333333
V
0,3.34739685058594
V
-1,0
BOT
0,38.1605
V
0,3.18098068237305
V
-1,0
BOT
0,38.1671666666667
V
0,3.01885604858398
V
-1,0
BOT
0,38.1738333333333
V
0,2.86245346069336
V
-1,0
BOT
0,38.1805
V
0,2.71224975585937
V
-1,0
BOT
0,38.1871666666667
V
0,2.57015228271484
V
-1,0
BOT
0,38.1938333333333
V
0,2.43663787841797
V
-1,0
BOT
0,38.2005
V
0,2.31027603149414
V
-1,0
BOT
0,38.2071666666667
V
0,2.19297409057617
V
-1,0
BOT
0,38.2138333333333
V
0,2.08473205566406
V
-1,0
BOT
0,38.2205
V
0,1.98554992675781
V
-1,0
BOT
0,38.2271666666667
V
0,1.89542770385742
V
-1,0
BOT
0,38.2338333333333
V
0,1.81436538696289
V
-1,0
BOT
0,38.2405
V
0,1.74427032470703
V
-1,0
BOT
0,38.2471666666667
V
0,1.68609619140625
V
-1,0
BOT
0,38.2538333333333
V
0,1.63984298706055
V
-1,0
BOT
0,38.2605
V
0,1.60598754882812
V
-1,0
BOT
0,38.2671666666667
V
0,1.58500671386719
V
-1,0
BOT
0,38.2738333333333
V
0,1.57690048217773
V
-1,0
BOT
0,38.2805
V
0,1.58309936523437
V
-1,0
BOT
0,38.2871666666667
V
0,1.60360336303711
V
-1,0
BOT
0,38.2938333333333
V
0,1.63984298706055
V
-1,0
BOT
0,38.3005
V
0,1.69134140014648
V
-1,0
BOT
0,38.3071666666667
V
0,1.75952911376953
V
-1,0
BOT
0,38.3138333333333
V
0,1.84392929077148
V
-1,0
BOT
0,38.3205
V
0,1.94692611694336
V
-1,0
BOT
0,38.3271666666667
V
0,2.06804275512695
V
-1,0
BOT
0,38.3338333333333
V
0,2.20727920532227
V
-1,0
BOT
0,38.3405
V
0,2.36606597900391
V
-1,0
BOT
0,38.3471666666667
V
0,2.54440307617187
V
-1,0
BOT
0,38.3538333333333
V
0,2.74276733398437
V
-1,0
BOT
0,38.3605
V
0,2.96211242675781
V
-1,0
BOT
0,38.3671666666667
V
0,3.20148468017578
V
-1,0
BOT
0,38.3738333333333
V
0,3.46040725708008
V
-1,0
BOT
0,38.3805
V
0,3.7384033203125
V
-1,0
BOT
0,38.3871666666667
V
0,4.03594970703125
V
-1,0
BOT
0,38.3938333333333
V
0,4.35113906860352
V
-1,0
BOT
0,38.4005
V
0,4.6839714050293
V
-1,0
BOT
0,38.4071666666667
V
0,5.03206253051758
V
-1,0
BOT
0,38.4138333333333
V
0,5.39588928222656
V
-1,0
BOT
0,38.4205
V
0,5.77306747436523
V
-1,0
BOT
0,38.4271666666667
V
0,6.16216659545898
V
-1,0
BOT
0,38.4338333333333
V
0,6.5608024597168
V
-1,0
BOT
0,38.4405
V
0,6.96706771850586
V
-1,0
BOT
0,38.4471666666667
V
0,7.37857818603516
V
-1,0
BOT
0,38.4538333333333
V
0,7.79199600219727
V
-1,0
BOT
0,38.4605
V
0,8.20350646972656
V
-1,0
BOT
0,38.4671666666667
V
0,8.61072540283203
V
-1,0
BOT
0,38.4738333333333
V
0,9.01222229003906
V
-1,0
BOT
0,38.4805
V
0,9.40370559692383
V
-1,0
BOT
0,38.4871666666667
V
0,9.78231430053711
V
-1,0
BOT
0,38.4938333333333
V
0,10.1442337036133
V
-1,0
BOT
0,38.5005
V
0,10.4866027832031
V
-1,0
BOT
0,38.5071666666667
V
0,10.8075141906738
V
-1,0
BOT
0,38.5138333333333
V
0,11.1031532287598
V
-1,0
BOT
0,38.5205
V
0,11.3720893859863
V
-1,0
BOT
0,38.5271666666667
V
0,11.6114616394043
V
-1,0
BOT
0,38.5338333333333
V
0,11.8198394775391
V
-1,0
BOT
0,38.5405
V
0,11.9948387145996
V
-1,0
BOT
0,38.5471666666667
V
0,12.1345520019531
V
-1,0
BOT
0,38.5538333333333
V
0,12.2370719909668
V
-1,0
BOT
0,38.5605
V
0,12.3023986816406
V
-1,0
BOT
0,38.5671666666667
V
0,12.3291015625
V
-1,0
BOT
0,38.5738333333333
V
0,12.3186111450195
V
-1,0
BOT
0,38.5805
V
0,12.2723579406738
V
-1,0
BOT
0,38.5871666666667
V
0,12.1912956237793
V
-1,0
BOT
0,38.5938333333333
V
0,12.0754241943359
V
-1,0
BOT
0,38.6005
V
0,11.9261741638184
V
-1,0
BOT
0,38.6071666666667
V
0,11.7449760437012
V
-1,0
BOT
0,38.6138333333333
V
0,11.5327835083008
V
-1,0
BOT
0,38.6205
V
0,11.29150390625
V
-1,0
BOT
0,38.6271666666667
V
0,11.0235214233398
V
-1,0
BOT
0,38.6338333333333
V
0,10.7312202453613
V
-1,0
BOT
0,38.6405
V
0,10.4179382324219
V
-1,0
BOT
0,38.6471666666667
V
0,10.0870132446289
V
-1,0
BOT
0,38.6538333333333
V
0,9.74130630493164
V
-1,0
BOT
0,38.6605
V
0,9.3841552734375
V
-1,0
BOT
0,38.6671666666667
V
0,9.0174674987793
V
-1,0
BOT
0,38.6738333333333
V
0,8.64458084106445
V
-1,0
BOT
0,38.6805
V
0,8.26835632324219
V
-1,0
BOT
0,38.6871666666667
V
0,7.89117813110352
V
-1,0
BOT
0,38.6938333333333
V
0,7.51447677612305
V
-1,0
BOT
0,38.7005
V
0,7.1406364440918
V
-1,0
BOT
0,38.7071666666667
V
0,6.77156448364258
V
-1,0
BOT
0,38.7138333333333
V
0,6.4091682434082
V
-1,0
BOT
0,38.7205
V
0,6.05392456054688
V
-1,0
BOT
0,38.7271666666667
V
0,5.706787109375
V
-1,0
BOT
0,38.7338333333333
V
0,5.3706169128418
V
-1,0
BOT
0,38.7405
V
0,5.04636764526367
V
-1,0
BOT
0,38.7471666666667
V
0,4.73356246948242
V
-1,0
BOT
0,38.7538333333333
V
0,4.43220138549805
V
-1,0
BOT
0,38.7605
V
0,4.14466857910156
V
-1,0
BOT
0,38.7671666666667
V
0,3.87096405029297
V
-1,0
BOT
0,38.7738333333333
V
0,3.61204147338867
V
-1,0
BOT
0,38.7805
V
0,3.36647033691406
V
-1,0
BOT
0,38.7871666666667
V
0,3.13329696655273
V
-1,0
BOT
0,38.7938333333333
V
0,2.91347503662109
V
-1,0
BOT
0,38.8005
V
0,2.70843505859375
V
-1,0
BOT
0,38.8071666666667
V
0,2.51674652099609
V
-1,0
BOT
0,38.8138333333333
V
0,2.33745574951172
V
-1,0
BOT
0,38.8205
V
0,2.16913223266602
V
-1,0
BOT
0,38.8271666666667
V
0,2.01177597045898
V
-1,0
BOT
0,38.8338333333333
V
0,1.86634063720703
V
-1,0
BOT
0,38.8405
V
0,1.72996520996094
V
-1,0
BOT
0,38.8471666666667
V
0,1.6026496887207
V
-1,0
BOT
0,38.8538333333333
V
0,1.48391723632812
V
-1,0
BOT
0,38.8605
V
0,1.3737678527832
V
-1,0
BOT
0,38.8671666666667
V
0,1.27124786376953
V
-1,0
BOT
0,38.8738333333333
V
0,1.17635726928711
V
-1,0
BOT
0,38.8805
V
0,1.08909606933594
V
-1,0
BOT
0,38.8871666666667
V
0,1.00851058959961
V
-1,0
BOT
0,38.8938333333333
V
0,0.933647155761719
V
-1,0
BOT
0,38.9005
V
0,0.865459442138672
V
-1,0
BOT
0,38.9071666666667
V
0,0.804424285888672
V
-1,0
BOT
0,38.9138333333333
V
0,0.748634338378906
V
-1,0
BOT
0,38.9205
V
0,0.697612762451172
V
-1,0
BOT
0,38.9271666666667
V
0,0.649452209472656
V
-1,0
BOT
0,38.9338333333333
V
0,0.605583190917969
V
-1,0
BOT
0,38.9405
V
0,0.565052032470703
V
-1,0
BOT
0,38.9471666666667
V
0,0.527858734130859
V
-1,0
BOT
0,38.9538333333333
V
0,0.493049621582031
V
-1,0
BOT
0,38.9605
V
0,0.461578369140625
V
-1,0
BOT
0,38.9671666666667
V
0,0.432014465332031
V
-1,0
BOT
0,38.9738333333333
V
0,0.405311584472656
V
-1,0
BOT
0,38.9805
V
0,0.380992889404297
V
-1,0
BOT
0,38.9871666666667
V
0,0.359058380126953
V
-1,0
BOT
0,38.9938333333333
V
0,0.338554382324219
V
-1,0
BOT
0,39.0005
V
0,0.319004058837891
V
-1,0
BOT
0,39.0071666666667
V
0,0.300884246826172
V
-1,0
BOT
0,39.0138333333333
V
0,0.284194946289062
V
-1,0
BOT
0,39.0205
V
0,0.267505645751953
V
-1,0
BOT
0,39.0271666666667
V
0,0.251293182373047
V
-1,0
BOT
0,39.0338333333333
V
0,0.235557556152344
V
-1,0
BOT
0,39.0405
V
0,0.22125244140625
V
-1,0
BOT
0,39.0471666666667
V
0,0.207901000976562
V
-1,0
BOT
0,39.0538333333333
V
0,0.195503234863281
V
-1,0
BOT
0,39.0605
V
0,0.185012817382812
V
-1,0
BOT
0,39.0671666666667
V
0,0.176429748535156
V
-1,0
BOT
0,39.0738333333333
V
0,0.169277191162109
V
-1,0
BOT
0,39.0805
V
0,0.163078308105469
V
-1,0
BOT
0,39.0871666666667
V
0,0.157833099365234
V
-1,0
BOT
0,39.0938333333333
V
0,0.153541564941406
V
-1,0
BOT
0,39.1005
V
0,0.149250030517578
V
-1,0
BOT
0,39.1071666666667
V
0,0.14495849609375
V
-1,0
BOT
0,39.1138333333333
V
0,0.139713287353516
V
-1,0
BOT
0,39.1205
V
0,0.133514404296875
V
-1,0
BOT
0,39.1271666666667
V
0,0.127315521240234
V
-1,0
BOT
0,39.1338333333333
V
0,0.121593475341797
V
-1,0
BOT
0,39.1405
V
0,0.117301940917969
V
-1,0
BOT
0,39.1471666666667
V
0,0.113487243652344
V
-1,0
BOT
0,39.1538333333333
V
0,0.108718872070312
V
-1,0
BOT
0,39.1605
V
0,0.103950500488281
V
-1,0
BOT
0,39.1671666666667
V
0,0.100612640380859
V
-1,0
BOT
0,39.1738333333333
V
0,0.0967979431152344
V
-1,0
BOT
0,39.1805
V
0,0.0925064086914063
V
-1,0
BOT
0,39.1871666666667
V
0,0.0882148742675781
V
-1,0
BOT
0,39.1938333333333
V
0,0.0858306884765625
V
-1,0
BOT
0,39.2005
V
0,0.0853538513183594
V
-1,0
BOT
0,39.2071666666667
V
0,0.0848770141601563
V
-1,0
BOT
0,39.2138333333333
V
0,0.0834465026855469
V
-1,0
BOT
0,39.2205
V
0,0.0820159912109375
V
-1,0
BOT
0,39.2271666666667
V
0,0.080108642578125
V
-1,0
BOT
0,39.2338333333333
V
0,0.0786781311035156
V
-1,0
BOT
0,39.2405
V
0,0.0758171081542969
V
-1,0
BOT
0,39.2471666666667
V
0,0.0720024108886719
V
-1,0
BOT
0,39.2538333333333
V
0,0.06866455078125
V
-1,0
BOT
0,39.2605
V
0,0.0658035278320313
V
-1,0
BOT
0,39.2671666666667
V
0,0.0634193420410156
V
-1,0
BOT
0,39.2738333333333
V
0,0.0605583190917969
V
-1,0
BOT
0,39.2805
V
0,0.0596046447753906
V
-1,0
BOT
0,39.2871666666667
V
0,0.0591278076171875
V
-1,0
BOT
0,39.2938333333333
V
0,0.0581741333007813
V
-1,0
BOT
0,39.3005
V
0,0.057220458984375
V
-1,0
BOT
0,39.3071666666667
V
0,0.0557899475097656
V
-1,0
BOT
0,39.3138333333333
V
0,0.0548362731933594
V
-1,0
BOT
0,39.3205
V
0,0.05340576171875
V
-1,0
BOT
0,39.3271666666667
V
0,0.0514984130859375
V
-1,0
BOT
0,39.3338333333333
V
0,0.0500679016113281
V
-1,0
BOT
0,39.3405
V
0,0.0481605529785156
V
-1,0
BOT
0,39.3471666666667
V
0,0.0462532043457031
V
-1,0
BOT
0,39.3538333333333
V
0,0.0452995300292969
V
-1,0
BOT
0,39.3605
V
0,0.0452995300292969
V
-1,0
BOT
0,39.3671666666667
V
0,0.0452995300292969
V
-1,0
BOT
0,39.3738333333333
V
0,0.0443458557128906
V
-1,0
BOT
0,39.3805
V
0,0.0438690185546875
V
-1,0
BOT
0,39.3871666666667
V
0,0.0438690185546875
V
-1,0
BOT
0,39.3938333333333
V
0,0.0438690185546875
V
-1,0
BOT
0,39.4005
V
0,0.0438690185546875
V
-1,0
BOT
0,39.4071666666667
V
0,0.0438690185546875
V
-1,0
BOT
0,39.4138333333333
V
0,0.0448226928710938
V
-1,0
BOT
0,39.4205
V
0,0.0448226928710938
V
-1,0
BOT
0,39.4271666666667
V
0,0.0438690185546875
V
-1,0
BOT
0,39.4338333333333
V
0,0.041961669921875
V
-1,0
BOT
0,39.4405
V
0,0.0405311584472656
V
-1,0
BOT
0,39.4471666666667
V
0,0.0400543212890625
V
-1,0
BOT
0,39.4538333333333
V
0,0.0395774841308594
V
-1,0
BOT
0,39.4605
V
0,0.0391006469726562
V
-1,0
BOT
0,39.4671666666667
V
0,0.0386238098144531
V
-1,0
BOT
0,39.4738333333333
V
0,0.0386238098144531
V
-1,0
BOT
0,39.4805
V
0,0.03814697265625
V
-1,0
BOT
0,39.4871666666667
V
0,0.0367164611816406
V
-1,0
BOT
0,39.4938333333333
V
0,0.0352859497070312
V
-1,0
BOT
0,39.5005
V
0,0.0348091125488281
V
-1,0
BOT
0,39.5071666666667
V
0,0.0352859497070312
V
-1,0
BOT
0,39.5138333333333
V
0,0.0367164611816406
V
-1,0
BOT
0,39.5205
V
0,0.0391006469726562
V
-1,0
BOT
0,39.5271666666667
V
0,0.041961669921875
V
-1,0
BOT
0,39.5338333333333
V
0,0.0452995300292969
V
-1,0
BOT
0,39.5405
V
0,0.0481605529785156
V
-1,0
BOT
0,39.5471666666667
V
0,0.0505447387695313
V
-1,0
BOT
0,39.5538333333333
V
0,0.0514984130859375
V
-1,0
BOT
0,39.5605
V
0,0.0524520874023438
V
-1,0
BOT
0,39.5671666666667
V
0,0.0529289245605469
V
-1,0
BOT
0,39.5738333333333
V
0,0.0548362731933594
V
-1,0
BOT
0,39.5805
V
0,0.0581741333007813
V
-1,0
BOT
0,39.5871666666667
V
0,0.0619888305664063
V
-1,0
BOT
0,39.5938333333333
V
0,0.0658035278320313
V
-1,0
BOT
0,39.6005
V
0,0.0705718994140625
V
-1,0
BOT
0,39.6071666666667
V
0,0.0762939453125
V
-1,0
BOT
0,39.6138333333333
V
0,0.0829696655273438
V
-1,0
BOT
0,39.6205
V
0,0.0886917114257813
V
-1,0
BOT
0,39.6271666666667
V
0,0.0939369201660156
V
-1,0
BOT
0,39.6338333333333
V
0,0.09918212890625
V
-1,0
BOT
0,39.6405
V
0,0.104427337646484
V
-1,0
BOT
0,39.6471666666667
V
0,0.109672546386719
V
-1,0
BOT
0,39.6538333333333
V
0,0.113964080810547
V
-1,0
BOT
0,39.6605
V
0,0.118732452392578
V
-1,0
BOT
0,39.6671666666667
V
0,0.123023986816406
V
-1,0
BOT
0,39.6738333333333
V
0,0.127792358398437
V
-1,0
BOT
0,39.6805
V
0,0.133514404296875
V
-1,0
BOT
0,39.6871666666667
V
0,0.138759613037109
V
-1,0
BOT
0,39.6938333333333
V
0,0.143527984619141
V
-1,0
BOT
0,39.7005
V
0,0.148296356201172
V
-1,0
BOT
0,39.7071666666667
V
0,0.153541564941406
V
-1,0
BOT
0,39.7138333333333
V
0,0.158786773681641
V
-1,0
BOT
0,39.7205
V
0,0.163078308105469
V
-1,0
BOT
0,39.7271666666667
V
0,0.1678466796875
V
-1,0
BOT
0,39.7338333333333
V
0,0.172138214111328
V
-1,0
BOT
0,39.7405
V
0,0.175952911376953
V
-1,0
BOT
0,39.7471666666667
V
0,0.179767608642578
V
-1,0
BOT
0,39.7538333333333
V
0,0.182628631591797
V
-1,0
BOT
0,39.7605
V
0,0.185489654541016
V
-1,0
BOT
0,39.7671666666667
V
0,0.186920166015625
V
-1,0
BOT
0,39.7738333333333
V
0,0.187873840332031
V
-1,0
BOT
0,39.7805
V
0,0.187873840332031
V
-1,0
BOT
0,39.7871666666667
V
0,0.186920166015625
V
-1,0
BOT
0,39.7938333333333
V
0,0.186443328857422
V
-1,0
BOT
0,39.8005
V
0,0.186920166015625
V
-1,0
BOT
0,39.8071666666667
V
0,0.186443328857422
V
-1,0
BOT
0,39.8138333333333
V
0,0.185966491699219
V
-1,0
BOT
0,39.8205
V
0,0.185012817382812
V
-1,0
BOT
0,39.8271666666667
V
0,0.184059143066406
V
-1,0
BOT
0,39.8338333333333
V
0,0.182151794433594
V
-1,0
BOT
0,39.8405
V
0,0.178813934326172
V
-1,0
BOT
0,39.8471666666667
V
0,0.176429748535156
V
-1,0
BOT
0,39.8538333333333
V
0,0.174522399902344
V
-1,0
BOT
0,39.8605
V
0,0.172615051269531
V
-1,0
BOT
0,39.8671666666667
V
0,0.170707702636719
V
-1,0
BOT
0,39.8738333333333
V
0,0.1678466796875
V
-1,0
BOT
0,39.8805
V
0,0.164508819580078
V
-1,0
BOT
0,39.8871666666667
V
0,0.16021728515625
V
-1,0
BOT
0,39.8938333333333
V
0,0.155448913574219
V
-1,0
BOT
0,39.9005
V
0,0.150680541992187
V
-1,0
BOT
0,39.9071666666667
V
0,0.146389007568359
V
-1,0
BOT
0,39.9138333333333
V
0,0.142097473144531
V
-1,0
BOT
0,39.9205
V
0,0.137805938720703
V
-1,0
BOT
0,39.9271666666667
V
0,0.133037567138672
V
-1,0
BOT
0,39.9338333333333
V
0,0.128269195556641
V
-1,0
BOT
0,39.9405
V
0,0.123977661132812
V
-1,0
BOT
0,39.9471666666667
V
0,0.119686126708984
V
-1,0
BOT
0,39.9538333333333
V
0,0.115394592285156
V
-1,0
BOT
0,39.9605
V
0,0.111103057861328
V
-1,0
BOT
0,39.9671666666667
V
0,0.108242034912109
V
-1,0
BOT
0,39.9738333333333
V
0,0.104904174804687
V
-1,0
BOT
0,39.9805
V
0,0.101089477539062
V
-1,0
BOT
0,39.9871666666667
V
0,0.0963211059570313
V
-1,0
BOT
0,39.9938333333333
V
0,0.091552734375
V
-1,0
BOT
0,40.0005
V
0,0.0863075256347656
V
-1,0
BOT
0,40.0071666666667
V
0,0.0810623168945313
V
-1,0
BOT
0,40.0138333333333
V
0,0.0758171081542969
V
-1,0
BOT
0,40.0205
V
0,0.0710487365722656
V
-1,0
BOT
0,40.0271666666667
V
0,0.0662803649902344
V
-1,0
BOT
0,40.0338333333333
V
0,0.0619888305664063
V
-1,0
BOT
0,40.0405
V
0,0.0576972961425781
V
-1,0
BOT
0,40.0471666666667
V
0,0.05340576171875
V
-1,0
BOT
0,40.0538333333333
V
0,0.0486373901367188
V
-1,0
BOT
0,40.0605
V
0,0.0457763671875
V
-1,0
BOT
0,40.0671666666667
V
0,0.0429153442382813
V
-1,0
BOT
0,40.0738333333333
V
0,0.0410079956054688
V
-1,0
BOT
0,40.0805
V
0,0.0391006469726562
V
-1,0
BOT
0,40.0871666666667
V
0,0.0371932983398437
V
-1,0
BOT
0,40.0938333333333
V
0,0.0348091125488281
V
-1,0
BOT
0,40.1005
V
0,0.0314712524414062
V
-1,0
BOT
0,40.1071666666667
V
0,0.0290870666503906
V
-1,0
BOT
0,40.1138333333333
V
0,0.0257492065429687
V
-1,0
BOT
0,40.1205
V
0,0.0224113464355469
V
-1,0
BOT
0,40.1271666666667
V
0,0.0200271606445312
V
-1,0
BOT
0,40.1338333333333
V
0,0.0200271606445312
V
-1,0
BOT
0,40.1405
V
0,0.0219345092773437
V
-1,0
BOT
0,40.1471666666667
V
0,0.0238418579101562
V
-1,0
BOT
0,40.1538333333333
V
0,0.0257492065429687
V
-1,0
BOT
0,40.1605
V
0,0.0281333923339844
V
-1,0
BOT
0,40.1671666666667
V
0,0.0300407409667969
V
-1,0
BOT
0,40.1738333333333
V
0,0.0300407409667969
V
-1,0
BOT
0,40.1805
V
0,0.0295639038085937
V
-1,0
BOT
0,40.1871666666667
V
0,0.0290870666503906
V
-1,0
BOT
0,40.1938333333333
V
0,0.0295639038085937
V
-1,0
BOT
0,40.2005
V
0,0.0319480895996094
V
-1,0
BOT
0,40.2071666666667
V
0,0.0362396240234375
V
-1,0
BOT
0,40.2138333333333
V
0,0.0414848327636719
V
-1,0
BOT
0,40.2205
V
0,0.0472068786621094
V
-1,0
BOT
0,40.2271666666667
V
0,0.05340576171875
V
-1,0
BOT
0,40.2338333333333
V
0,0.0605583190917969
V
-1,0
BOT
0,40.2405
V
0,0.06866455078125
V
-1,0
BOT
0,40.2471666666667
V
0,0.0767707824707031
V
-1,0
BOT
0,40.2538333333333
V
0,0.0848770141601563
V
-1,0
BOT
0,40.2605
V
0,0.0944137573242188
V
-1,0
BOT
0,40.2671666666667
V
0,0.105857849121094
V
-1,0
BOT
0,40.2738333333333
V
0,0.117301940917969
V
-1,0
BOT
0,40.2805
V
0,0.128746032714844
V
-1,0
BOT
0,40.2871666666667
V
0,0.142574310302734
V
-1,0
BOT
0,40.2938333333333
V
0,0.157356262207031
V
-1,0
BOT
0,40.3005
V
0,0.173091888427734
V
-1,0
BOT
0,40.3071666666667
V
0,0.188827514648437
V
-1,0
BOT
0,40.3138333333333
V
0,0.205516815185547
V
-1,0
BOT
0,40.3205
V
0,0.222206115722656
V
-1,0
BOT
0,40.3271666666667
V
0,0.238895416259766
V
-1,0
BOT
0,40.3338333333333
V
0,0.254631042480469
V
-1,0
BOT
0,40.3405
V
0,0.271320343017578
V
-1,0
BOT
0,40.3471666666667
V
0,0.288009643554687
V
-1,0
BOT
0,40.3538333333333
V
0,0.306129455566406
V
-1,0
BOT
0,40.3605
V
0,0.324249267578125
V
-1,0
BOT
0,40.3671666666667
V
0,0.342845916748047
V
-1,0
BOT
0,40.3738333333333
V
0,0.361442565917969
V
-1,0
BOT
0,40.3805
V
0,0.380039215087891
V
-1,0
BOT
0,40.3871666666667
V
0,0.398635864257812
V
-1,0
BOT
0,40.3938333333333
V
0,0.417232513427734
V
-1,0
BOT
0,40.4005
V
0,0.434398651123047
V
-1,0
BOT
0,40.4071666666667
V
0,0.451087951660156
V
-1,0
BOT
0,40.4138333333333
V
0,0.467300415039063
V
-1,0
BOT
0,40.4205
V
0,0.483036041259766
V
-1,0
BOT
0,40.4271666666667
V
0,0.496864318847656
V
-1,0
BOT
0,40.4338333333333
V
0,0.507831573486328
V
-1,0
BOT
0,40.4405
V
0,0.517368316650391
V
-1,0
BOT
0,40.4471666666667
V
0,0.52642822265625
V
-1,0
BOT
0,40.4538333333333
V
0,0.535011291503906
V
-1,0
BOT
0,40.4605
V
0,0.543117523193359
V
-1,0
BOT
0,40.4671666666667
V
0,0.550270080566406
V
-1,0
BOT
0,40.4738333333333
V
0,0.55694580078125
V
-1,0
BOT
0,40.4805
V
0,0.562667846679688
V
-1,0
BOT
0,40.4871666666667
V
0,0.566005706787109
V
-1,0
BOT
0,40.4938333333333
V
0,0.566959381103516
V
-1,0
BOT
0,40.5005
V
0,0.565052032470703
V
-1,0
BOT
0,40.5071666666667
V
0,0.560283660888672
V
-1,0
BOT
0,40.5138333333333
V
0,0.553607940673828
V
-1,0
BOT
0,40.5205
V
0,0.545978546142578
V
-1,0
BOT
0,40.5271666666667
V
0,0.536441802978516
V
-1,0
BOT
0,40.5338333333333
V
0,0.525951385498047
V
-1,0
BOT
0,40.5405
V
0,0.514984130859375
V
-1,0
BOT
0,40.5471666666667
V
0,0.504016876220703
V
-1,0
BOT
0,40.5538333333333
V
0,0.492572784423828
V
-1,0
BOT
0,40.5605
V
0,0.481128692626953
V
-1,0
BOT
0,40.5671666666667
V
0,0.468254089355469
V
-1,0
BOT
0,40.5738333333333
V
0,0.454902648925781
V
-1,0
BOT
0,40.5805
V
0,0.440597534179688
V
-1,0
BOT
0,40.5871666666667
V
0,0.425815582275391
V
-1,0
BOT
0,40.5938333333333
V
0,0.410079956054688
V
-1,0
BOT
0,40.6005
V
0,0.394344329833984
V
-1,0
BOT
0,40.6071666666667
V
0,0.379562377929687
V
-1,0
BOT
0,40.6138333333333
V
0,0.365257263183594
V
-1,0
BOT
0,40.6205
V
0,0.350475311279297
V
-1,0
BOT
0,40.6271666666667
V
0,0.335693359375
V
-1,0
BOT
0,40.6338333333333
V
0,0.321865081787109
V
-1,0
BOT
0,40.6405
V
0,0.307559967041016
V
-1,0
BOT
0,40.6471666666667
V
0,0.291824340820312
V
-1,0
BOT
0,40.6538333333333
V
0,0.274658203125
V
-1,0
BOT
0,40.6605
V
0,0.257492065429687
V
-1,0
BOT
0,40.6671666666667
V
0,0.240802764892578
V
-1,0
BOT
0,40.6738333333333
V
0,0.225543975830078
V
-1,0
BOT
0,40.6805
V
0,0.212192535400391
V
-1,0
BOT
0,40.6871666666667
V
0,0.200748443603516
V
-1,0
BOT
0,40.6938333333333
V
0,0.192165374755859
V
-1,0
BOT
0,40.7005
V
0,0.185012817382812
V
-1,0
BOT
0,40.7071666666667
V
0,0.177383422851562
V
-1,0
BOT
0,40.7138333333333
V
0,0.168800354003906
V
-1,0
BOT
0,40.7205
V
0,0.159263610839844
V
-1,0
BOT
0,40.7271666666667
V
0,0.148296356201172
V
-1,0
BOT
0,40.7338333333333
V
0,0.138282775878906
V
-1,0
BOT
0,40.7405
V
0,0.12969970703125
V
-1,0
BOT
0,40.7471666666667
V
0,0.123023986816406
V
-1,0
BOT
0,40.7538333333333
V
0,0.117301940917969
V
-1,0
BOT
0,40.7605
V
0,0.112056732177734
V
-1,0
BOT
0,40.7671666666667
V
0,0.1068115234375
V
-1,0
BOT
0,40.7738333333333
V
0,0.102043151855469
V
-1,0
BOT
0,40.7805
V
0,0.0963211059570313
V
-1,0
BOT
0,40.7871666666667
V
0,0.0901222229003906
V
-1,0
BOT
0,40.7938333333333
V
0,0.0844001770019531
V
-1,0
BOT
0,40.8005
V
0,0.080108642578125
V
-1,0
BOT
0,40.8071666666667
V
0,0.0772476196289063
V
-1,0
BOT
0,40.8138333333333
V
0,0.0743865966796875
V
-1,0
BOT
0,40.8205
V
0,0.0729560852050781
V
-1,0
BOT
0,40.8271666666667
V
0,0.0720024108886719
V
-1,0
BOT
0,40.8338333333333
V
0,0.0720024108886719
V
-1,0
BOT
0,40.8405
V
0,0.0715255737304688
V
-1,0
BOT
0,40.8471666666667
V
0,0.0720024108886719
V
-1,0
BOT
0,40.8538333333333
V
0,0.072479248046875
V
-1,0
BOT
0,40.8605
V
0,0.0729560852050781
V
-1,0
BOT
0,40.8671666666667
V
0,0.072479248046875
V
-1,0
BOT
0,40.8738333333333
V
0,0.0710487365722656
V
-1,0
BOT
0,40.8805
V
0,0.0700950622558594
V
-1,0
BOT
0,40.8871666666667
V
0,0.0700950622558594
V
-1,0
BOT
0,40.8938333333333
V
0,0.0710487365722656
V
-1,0
BOT
0,40.9005
V
0,0.072479248046875
V
-1,0
BOT
0,40.9071666666667
V
0,0.0753402709960938
V
-1,0
BOT
0,40.9138333333333
V
0,0.0796318054199219
V
-1,0
BOT
0,40.9205
V
0,0.0848770141601563
V
-1,0
BOT
0,40.9271666666667
V
0,0.0896453857421875
V
-1,0
BOT
0,40.9338333333333
V
0,0.0934600830078125
V
-1,0
BOT
0,40.9405
V
0,0.0972747802734375
V
-1,0
BOT
0,40.9471666666667
V
0,0.0996589660644531
V
-1,0
BOT
0,40.9538333333333
V
0,0.102043151855469
V
-1,0
BOT
0,40.9605
V
0,0.103473663330078
V
-1,0
BOT
0,40.9671666666667
V
0,0.104904174804687
V
-1,0
BOT
0,40.9738333333333
V
0,0.107765197753906
V
-1,0
BOT
0,40.9805
V
0,0.110626220703125
V
-1,0
BOT
0,40.9871666666667
V
0,0.114917755126953
V
-1,0
BOT
0,40.9938333333333
V
0,0.120162963867187
V
-1,0
BOT
0,41.0005
V
0,0.125885009765625
V
-1,0
BOT
0,41.0071666666667
V
0,0.131607055664062
V
-1,0
BOT
0,41.0138333333333
V
0,0.1373291015625
V
-1,0
BOT
0,41.0205
V
0,0.142097473144531
V
-1,0
BOT
0,41.0271666666667
V
0,0.146389007568359
V
-1,0
BOT
0,41.0338333333333
V
0,0.150203704833984
V
-1,0
BOT
0,41.0405
V
0,0.154018402099609
V
-1,0
BOT
0,41.0471666666667
V
0,0.158309936523437
V
-1,0
BOT
0,41.0538333333333
V
0,0.162601470947266
V
-1,0
BOT
0,41.0605
V
0,0.166893005371094
V
-1,0
BOT
0,41.0671666666667
V
0,0.171661376953125
V
-1,0
BOT
0,41.0738333333333
V
0,0.177860260009766
V
-1,0
BOT
0,41.0805
V
0,0.184059143066406
V
-1,0
BOT
0,41.0871666666667
V
0,0.189304351806641
V
-1,0
BOT
0,41.0938333333333
V
0,0.193595886230469
V
-1,0
BOT
0,41.1005
V
0,0.197410583496094
V
-1,0
BOT
0,41.1071666666667
V
0,0.200748443603516
V
-1,0
BOT
0,41.1138333333333
V
0,0.204086303710937
V
-1,0
BOT
0,41.1205
V
0,0.206470489501953
V
-1,0
BOT
0,41.1271666666667
V
0,0.209331512451172
V
-1,0
BOT
0,41.1338333333333
V
0,0.211238861083984
V
-1,0
BOT
0,41.1405
V
0,0.213623046875
V
-1,0
BOT
0,41.1471666666667
V
0,0.215053558349609
V
-1,0
BOT
0,41.1538333333333
V
0,0.216007232666016
V
-1,0
BOT
0,41.1605
V
0,0.216007232666016
V
-1,0
BOT
0,41.1671666666667
V
0,0.215530395507812
V
-1,0
BOT
0,41.1738333333333
V
0,0.216007232666016
V
-1,0
BOT
0,41.1805
V
0,0.215530395507812
V
-1,0
BOT
0,41.1871666666667
V
0,0.215053558349609
V
-1,0
BOT
0,41.1938333333333
V
0,0.215053558349609
V
-1,0
BOT
0,41.2005
V
0,0.214576721191406
V
-1,0
BOT
0,41.2071666666667
V
0,0.214576721191406
V
-1,0
BOT
0,41.2138333333333
V
0,0.213146209716797
V
-1,0
BOT
0,41.2205
V
0,0.212669372558594
V
-1,0
BOT
0,41.2271666666667
V
0,0.211715698242187
V
-1,0
BOT
0,41.2338333333333
V
0,0.209331512451172
V
-1,0
BOT
0,41.2405
V
0,0.20599365234375
V
-1,0
BOT
0,41.2471666666667
V
0,0.202655792236328
V
-1,0
BOT
0,41.2538333333333
V
0,0.198841094970703
V
-1,0
BOT
0,41.2605
V
0,0.195026397705078
V
-1,0
BOT
0,41.2671666666667
V
0,0.191211700439453
V
-1,0
BOT
0,41.2738333333333
V
0,0.188350677490234
V
-1,0
BOT
0,41.2805
V
0,0.185966491699219
V
-1,0
BOT
0,41.2871666666667
V
0,0.18310546875
V
-1,0
BOT
0,41.2938333333333
V
0,0.179767608642578
V
-1,0
BOT
0,41.3005
V
0,0.176429748535156
V
-1,0
BOT
0,41.3071666666667
V
0,0.173568725585937
V
-1,0
BOT
0,41.3138333333333
V
0,0.170230865478516
V
-1,0
BOT
0,41.3205
V
0,0.168323516845703
V
-1,0
BOT
0,41.3271666666667
V
0,0.167369842529297
V
-1,0
BOT
0,41.3338333333333
V
0,0.166893005371094
V
-1,0
BOT
0,41.3405
V
0,0.167369842529297
V
-1,0
BOT
0,41.3471666666667
V
0,0.167369842529297
V
-1,0
BOT
0,41.3538333333333
V
0,0.168323516845703
V
-1,0
BOT
0,41.3605
V
0,0.169754028320312
V
-1,0
BOT
0,41.3671666666667
V
0,0.171661376953125
V
-1,0
BOT
0,41.3738333333333
V
0,0.173568725585937
V
-1,0
BOT
0,41.3805
V
0,0.17547607421875
V
-1,0
BOT
0,41.3871666666667
V
0,0.176906585693359
V
-1,0
BOT
0,41.3938333333333
V
0,0.179767608642578
V
-1,0
BOT
0,41.4005
V
0,0.183582305908203
V
-1,0
BOT
0,41.4071666666667
V
0,0.188350677490234
V
-1,0
BOT
0,41.4138333333333
V
0,0.194549560546875
V
-1,0
BOT
0,41.4205
V
0,0.200748443603516
V
-1,0
BOT
0,41.4271666666667
V
0,0.206947326660156
V
-1,0
BOT
0,41.4338333333333
V
0,0.212669372558594
V
-1,0
BOT
0,41.4405
V
0,0.218391418457031
V
-1,0
BOT
0,41.4471666666667
V
0,0.223636627197266
V
-1,0
BOT
0,41.4538333333333
V
0,0.229358673095703
V
-1,0
BOT
0,41.4605
V
0,0.23651123046875
V
-1,0
BOT
0,41.4671666666667
V
0,0.245094299316406
V
-1,0
BOT
0,41.4738333333333
V
0,0.254631042480469
V
-1,0
BOT
0,41.4805
V
0,0.263214111328125
V
-1,0
BOT
0,41.4871666666667
V
0,0.270843505859375
V
-1,0
BOT
0,41.4938333333333
V
0,0.277996063232422
V
-1,0
BOT
0,41.5005
V
0,0.285148620605469
V
-1,0
BOT
0,41.5071666666667
V
0,0.292301177978516
V
-1,0
BOT
0,41.5138333333333
V
0,0.299453735351562
V
-1,0
BOT
0,41.5205
V
0,0.306606292724609
V
-1,0
BOT
0,41.5271666666667
V
0,0.313282012939453
V
-1,0
BOT
0,41.5338333333333
V
0,0.319957733154297
V
-1,0
BOT
0,41.5405
V
0,0.326156616210937
V
-1,0
BOT
0,41.5471666666667
V
0,0.331401824951172
V
-1,0
BOT
0,41.5538333333333
V
0,0.336647033691406
V
-1,0
BOT
0,41.5605
V
0,0.340938568115234
V
-1,0
BOT
0,41.5671666666667
V
0,0.345706939697266
V
-1,0
BOT
0,41.5738333333333
V
0,0.350475311279297
V
-1,0
BOT
0,41.5805
V
0,0.355243682861328
V
-1,0
BOT
0,41.5871666666667
V
0,0.35858154296875
V
-1,0
BOT
0,41.5938333333333
V
0,0.360488891601562
V
-1,0
BOT
0,41.6005
V
0,0.360012054443359
V
-1,0
BOT
0,41.6071666666667
V
0,0.357151031494141
V
-1,0
BOT
0,41.6138333333333
V
0,0.352859497070312
V
-1,0
BOT
0,41.6205
V
0,0.347614288330078
V
-1,0
BOT
0,41.6271666666667
V
0,0.342369079589844
V
-1,0
BOT
0,41.6338333333333
V
0,0.337123870849609
V
-1,0
BOT
0,41.6405
V
0,0.332355499267578
V
-1,0
BOT
0,41.6471666666667
V
0,0.328540802001953
V
-1,0
BOT
0,41.6538333333333
V
0,0.323772430419922
V
-1,0
BOT
0,41.6605
V
0,0.317573547363281
V
-1,0
BOT
0,41.6671666666667
V
0,0.310420989990234
V
-1,0
BOT
0,41.6738333333333
V
0,0.302791595458984
V
-1,0
BOT
0,41.6805
V
0,0.294685363769531
V
-1,0
BOT
0,41.6871666666667
V
0,0.285148620605469
V
-1,0
BOT
0,41.6938333333333
V
0,0.275611877441406
V
-1,0
BOT
0,41.7005
V
0,0.266551971435547
V
-1,0
BOT
0,41.7071666666667
V
0,0.258922576904297
V
-1,0
BOT
0,41.7138333333333
V
0,0.250816345214844
V
-1,0
BOT
0,41.7205
V
0,0.242233276367187
V
-1,0
BOT
0,41.7271666666667
V
0,0.233173370361328
V
-1,0
BOT
0,41.7338333333333
V
0,0.225067138671875
V
-1,0
BOT
0,41.7405
V
0,0.216960906982422
V
-1,0
BOT
0,41.7471666666667
V
0,0.207901000976562
V
-1,0
BOT
0,41.7538333333333
V
0,0.197410583496094
V
-1,0
BOT
0,41.7605
V
0,0.187873840332031
V
-1,0
BOT
0,41.7671666666667
V
0,0.179290771484375
V
-1,0
BOT
0,41.7738333333333
V
0,0.171661376953125
V
-1,0
BOT
0,41.7805
V
0,0.164508819580078
V
-1,0
BOT
0,41.7871666666667
V
0,0.156879425048828
V
-1,0
BOT
0,41.7938333333333
V
0,0.150680541992187
V
-1,0
BOT
0,41.8005
V
0,0.144481658935547
V
-1,0
BOT
0,41.8071666666667
V
0,0.138282775878906
V
-1,0
BOT
0,41.8138333333333
V
0,0.130653381347656
V
-1,0
BOT
0,41.8205
V
0,0.123023986816406
V
-1,0
BOT
0,41.8271666666667
V
0,0.114917755126953
V
-1,0
BOT
0,41.8338333333333
V
0,0.107288360595703
V
-1,0
BOT
0,41.8405
V
0,0.101089477539062
V
-1,0
BOT
0,41.8471666666667
V
0,0.0958442687988281
V
-1,0
BOT
0,41.8538333333333
V
0,0.0910758972167969
V
-1,0
BOT
0,41.8605
V
0,0.0863075256347656
V
-1,0
BOT
0,41.8671666666667
V
0,0.0824928283691406
V
-1,0
BOT
0,41.8738333333333
V
0,0.0796318054199219
V
-1,0
BOT
0,41.8805
V
0,0.0777244567871094
V
-1,0
BOT
0,41.8871666666667
V
0,0.0758171081542969
V
-1,0
BOT
0,41.8938333333333
V
0,0.0743865966796875
V
-1,0
BOT
0,41.9005
V
0,0.0729560852050781
V
-1,0
BOT
0,41.9071666666667
V
0,0.0720024108886719
V
-1,0
BOT
0,41.9138333333333
V
0,0.0705718994140625
V
-1,0
BOT
0,41.9205
V
0,0.0691413879394531
V
-1,0
BOT
0,41.9271666666667
V
0,0.0677108764648438
V
-1,0
BOT
0,41.9338333333333
V
0,0.0658035278320313
V
-1,0
BOT
0,41.9405
V
0,0.064849853515625
V
-1,0
BOT
0,41.9471666666667
V
0,0.064849853515625
V
-1,0
BOT
0,41.9538333333333
V
0,0.0658035278320313
V
-1,0
BOT
0,41.9605
V
0,0.0672340393066406
V
-1,0
BOT
0,41.9671666666667
V
0,0.0691413879394531
V
-1,0
BOT
0,41.9738333333333
V
0,0.0710487365722656
V
-1,0
BOT
0,41.9805
V
0,0.0720024108886719
V
-1,0
BOT
0,41.9871666666667
V
0,0.072479248046875
V
-1,0
BOT
0,41.9938333333333
V
0,0.0720024108886719
V
-1,0
BOT
0,42.0005
V
0,0.0705718994140625
V
-1,0
BOT
0,42.0071666666667
V
0,0.0691413879394531
V
-1,0
BOT
0,42.0138333333333
V
0,0.0681877136230469
V
-1,0
BOT
0,42.0205
V
0,0.0691413879394531
V
-1,0
BOT
0,42.0271666666667
V
0,0.0715255737304688
V
-1,0
BOT
0,42.0338333333333
V
0,0.0729560852050781
V
-1,0
BOT
0,42.0405
V
0,0.0739097595214844
V
-1,0
BOT
0,42.0471666666667
V
0,0.0748634338378906
V
-1,0
BOT
0,42.0538333333333
V
0,0.0748634338378906
V
-1,0
BOT
0,42.0605
V
0,0.0739097595214844
V
-1,0
BOT
0,42.0671666666667
V
0,0.0715255737304688
V
-1,0
BOT
0,42.0738333333333
V
0,0.0700950622558594
V
-1,0
BOT
0,42.0805
V
0,0.0696182250976563
V
-1,0
BOT
0,42.0871666666667
V
0,0.0691413879394531
V
-1,0
BOT
0,42.0938333333333
V
0,0.06866455078125
V
-1,0
BOT
0,42.1005
V
0,0.0677108764648438
V
-1,0
BOT
0,42.1071666666667
V
0,0.0672340393066406
V
-1,0
BOT
0,42.1138333333333
V
0,0.0667572021484375
V
-1,0
BOT
0,42.1205
V
0,0.0653266906738281
V
-1,0
BOT
0,42.1271666666667
V
0,0.0634193420410156
V
-1,0
BOT
0,42.1338333333333
V
0,0.06103515625
V
-1,0
BOT
0,42.1405
V
0,0.0581741333007813
V
-1,0
BOT
0,42.1471666666667
V
0,0.0557899475097656
V
-1,0
BOT
0,42.1538333333333
V
0,0.05340576171875
V
-1,0
BOT
0,42.1605
V
0,0.0514984130859375
V
-1,0
BOT
0,42.1671666666667
V
0,0.0500679016113281
V
-1,0
BOT
0,42.1738333333333
V
0,0.0491142272949219
V
-1,0
BOT
0,42.1805
V
0,0.0481605529785156
V
-1,0
BOT
0,42.1871666666667
V
0,0.0472068786621094
V
-1,0
BOT
0,42.1938333333333
V
0,0.0462532043457031
V
-1,0
BOT
0,42.2005
V
0,0.0452995300292969
V
-1,0
BOT
0,42.2071666666667
V
0,0.0452995300292969
V
-1,0
BOT
0,42.2138333333333
V
0,0.0462532043457031
V
-1,0
BOT
0,42.2205
V
0,0.0467300415039063
V
-1,0
BOT
0,42.2271666666667
V
0,0.0462532043457031
V
-1,0
BOT
0,42.2338333333333
V
0,0.0452995300292969
V
-1,0
BOT
0,42.2405
V
0,0.0443458557128906
V
-1,0
BOT
0,42.2471666666667
V
0,0.0424385070800781
V
-1,0
BOT
0,42.2538333333333
V
0,0.0410079956054688
V
-1,0
BOT
0,42.2605
V
0,0.0400543212890625
V
-1,0
BOT
0,42.2671666666667
V
0,0.0400543212890625
V
-1,0
BOT
0,42.2738333333333
V
0,0.0405311584472656
V
-1,0
BOT
0,42.2805
V
0,0.0400543212890625
V
-1,0
BOT
0,42.2871666666667
V
0,0.0391006469726562
V
-1,0
BOT
0,42.2938333333333
V
0,0.03814697265625
V
-1,0
BOT
0,42.3005
V
0,0.0362396240234375
V
-1,0
BOT
0,42.3071666666667
V
0,0.034332275390625
V
-1,0
BOT
0,42.3138333333333
V
0,0.0338554382324219
V
-1,0
BOT
0,42.3205
V
0,0.0333786010742187
V
-1,0
BOT
0,42.3271666666667
V
0,0.0338554382324219
V
-1,0
BOT
0,42.3338333333333
V
0,0.0333786010742187
V
-1,0
BOT
0,42.3405
V
0,0.0333786010742187
V
-1,0
BOT
0,42.3471666666667
V
0,0.0329017639160156
V
-1,0
BOT
0,42.3538333333333
V
0,0.0329017639160156
V
-1,0
BOT
0,42.3605
V
0,0.0333786010742187
V
-1,0
BOT
0,42.3671666666667
V
0,0.0352859497070312
V
-1,0
BOT
0,42.3738333333333
V
0,0.0367164611816406
V
-1,0
BOT
0,42.3805
V
0,0.0391006469726562
V
-1,0
BOT
0,42.3871666666667
V
0,0.0414848327636719
V
-1,0
BOT
0,42.3938333333333
V
0,0.0429153442382813
V
-1,0
BOT
0,42.4005
V
0,0.0433921813964844
V
-1,0
BOT
0,42.4071666666667
V
0,0.0438690185546875
V
-1,0
BOT
0,42.4138333333333
V
0,0.0438690185546875
V
-1,0
BOT
0,42.4205
V
0,0.0443458557128906
V
-1,0
BOT
0,42.4271666666667
V
0,0.0443458557128906
V
-1,0
BOT
0,42.4338333333333
V
0,0.0462532043457031
V
-1,0
BOT
0,42.4405
V
0,0.0476837158203125
V
-1,0
BOT
0,42.4471666666667
V
0,0.0481605529785156
V
-1,0
BOT
0,42.4538333333333
V
0,0.0486373901367188
V
-1,0
BOT
0,42.4605
V
0,0.049591064453125
V
-1,0
BOT
0,42.4671666666667
V
0,0.0510215759277344
V
-1,0
BOT
0,42.4738333333333
V
0,0.0500679016113281
V
-1,0
BOT
0,42.4805
V
0,0.049591064453125
V
-1,0
BOT
0,42.4871666666667
V
0,0.0505447387695313
V
-1,0
BOT
0,42.4938333333333
V
0,0.0529289245605469
V
-1,0
BOT
0,42.5005
V
0,0.0557899475097656
V
-1,0
BOT
0,42.5071666666667
V
0,0.0581741333007813
V
-1,0
BOT
0,42.5138333333333
V
0,0.0615119934082031
V
-1,0
BOT
0,42.5205
V
0,0.0643730163574219
V
-1,0
BOT
0,42.5271666666667
V
0,0.0653266906738281
V
-1,0
BOT
0,42.5338333333333
V
0,0.0662803649902344
V
-1,0
BOT
0,42.5405
V
0,0.0677108764648438
V
-1,0
BOT
0,42.5471666666667
V
0,0.0691413879394531
V
-1,0
BOT
0,42.5538333333333
V
0,0.0710487365722656
V
-1,0
BOT
0,42.5605
V
0,0.0734329223632813
V
-1,0
BOT
0,42.5671666666667
V
0,0.0772476196289063
V
-1,0
BOT
0,42.5738333333333
V
0,0.0796318054199219
V
-1,0
BOT
0,42.5805
V
0,0.0815391540527344
V
-1,0
BOT
0,42.5871666666667
V
0,0.0834465026855469
V
-1,0
BOT
0,42.5938333333333
V
0,0.0858306884765625
V
-1,0
BOT
0,42.6005
V
0,0.087738037109375
V
-1,0
BOT
0,42.6071666666667
V
0,0.0882148742675781
V
-1,0
BOT
0,42.6138333333333
V
0,0.0896453857421875
V
-1,0
BOT
0,42.6205
V
0,0.0901222229003906
V
-1,0
BOT
0,42.6271666666667
V
0,0.0886917114257813
V
-1,0
BOT
0,42.6338333333333
V
0,0.0867843627929688
V
-1,0
BOT
0,42.6405
V
0,0.0858306884765625
V
-1,0
BOT
0,42.6471666666667
V
0,0.0858306884765625
V
-1,0
BOT
0,42.6538333333333
V
0,0.0858306884765625
V
-1,0
BOT
0,42.6605
V
0,0.0863075256347656
V
-1,0
BOT
0,42.6671666666667
V
0,0.0872611999511719
V
-1,0
BOT
0,42.6738333333333
V
0,0.087738037109375
V
-1,0
BOT
0,42.6805
V
0,0.087738037109375
V
-1,0
BOT
0,42.6871666666667
V
0,0.0872611999511719
V
-1,0
BOT
0,42.6938333333333
V
0,0.0867843627929688
V
-1,0
BOT
0,42.7005
V
0,0.0863075256347656
V
-1,0
BOT
0,42.7071666666667
V
0,0.0858306884765625
V
-1,0
BOT
0,42.7138333333333
V
0,0.0848770141601563
V
-1,0
BOT
0,42.7205
V
0,0.0858306884765625
V
-1,0
BOT
0,42.7271666666667
V
0,0.0872611999511719
V
-1,0
BOT
0,42.7338333333333
V
0,0.0882148742675781
V
-1,0
BOT
0,42.7405
V
0,0.0882148742675781
V
-1,0
BOT
0,42.7471666666667
V
0,0.0882148742675781
V
-1,0
BOT
0,42.7538333333333
V
0,0.0882148742675781
V
-1,0
BOT
0,42.7605
V
0,0.0872611999511719
V
-1,0
BOT
0,42.7671666666667
V
0,0.0848770141601563
V
-1,0
BOT
0,42.7738333333333
V
0,0.0824928283691406
V
-1,0
BOT
0,42.7805
V
0,0.0810623168945313
V
-1,0
BOT
0,42.7871666666667
V
0,0.0805854797363281
V
-1,0
BOT
0,42.7938333333333
V
0,0.0810623168945313
V
-1,0
BOT
0,42.8005
V
0,0.0820159912109375
V
-1,0
BOT
0,42.8071666666667
V
0,0.0844001770019531
V
-1,0
BOT
0,42.8138333333333
V
0,0.087738037109375
V
-1,0
BOT
0,42.8205
V
0,0.0910758972167969
V
-1,0
BOT
0,42.8271666666667
V
0,0.0929832458496094
V
-1,0
BOT
0,42.8338333333333
V
0,0.0925064086914063
V
-1,0
BOT
0,42.8405
V
0,0.0901222229003906
V
-1,0
BOT
0,42.8471666666667
V
0,0.0872611999511719
V
-1,0
BOT
0,42.8538333333333
V
0,0.0844001770019531
V
-1,0
BOT
0,42.8605
V
0,0.0824928283691406
V
-1,0
BOT
0,42.8671666666667
V
0,0.0815391540527344
V
-1,0
BOT
0,42.8738333333333
V
0,0.0824928283691406
V
-1,0
BOT
0,42.8805
V
0,0.08392333984375
V
-1,0
BOT
0,42.8871666666667
V
0,0.0853538513183594
V
-1,0
BOT
0,42.8938333333333
V
0,0.0863075256347656
V
-1,0
BOT
0,42.9005
V
0,0.0872611999511719
V
-1,0
BOT
0,42.9071666666667
V
0,0.087738037109375
V
-1,0
BOT
0,42.9138333333333
V
0,0.0891685485839844
V
-1,0
BOT
0,42.9205
V
0,0.0901222229003906
V
-1,0
BOT
0,42.9271666666667
V
0,0.0910758972167969
V
-1,0
BOT
0,42.9338333333333
V
0,0.0920295715332031
V
-1,0
BOT
0,42.9405
V
0,0.0920295715332031
V
-1,0
BOT
0,42.9471666666667
V
0,0.091552734375
V
-1,0
BOT
0,42.9538333333333
V
0,0.091552734375
V
-1,0
BOT
0,42.9605
V
0,0.0929832458496094
V
-1,0
BOT
0,42.9671666666667
V
0,0.0948905944824219
V
-1,0
BOT
0,42.9738333333333
V
0,0.0972747802734375
V
-1,0
BOT
0,42.9805
V
0,0.0987052917480469
V
-1,0
BOT
0,42.9871666666667
V
0,0.100612640380859
V
-1,0
BOT
0,42.9938333333333
V
0,0.101566314697266
V
-1,0
BOT
0,43.0005
V
0,0.101566314697266
V
-1,0
BOT
0,43.0071666666667
V
0,0.101089477539062
V
-1,0
BOT
0,43.0138333333333
V
0,0.102519989013672
V
-1,0
BOT
0,43.0205
V
0,0.104427337646484
V
-1,0
BOT
0,43.0271666666667
V
0,0.105857849121094
V
-1,0
BOT
0,43.0338333333333
V
0,0.1068115234375
V
-1,0
BOT
0,43.0405
V
0,0.1068115234375
V
-1,0
BOT
0,43.0471666666667
V
0,0.1068115234375
V
-1,0
BOT
0,43.0538333333333
V
0,0.105381011962891
V
-1,0
BOT
0,43.0605
V
0,0.104427337646484
V
-1,0
BOT
0,43.0671666666667
V
0,0.102996826171875
V
-1,0
BOT
0,43.0738333333333
V
0,0.102043151855469
V
-1,0
BOT
0,43.0805
V
0,0.101566314697266
V
-1,0
BOT
0,43.0871666666667
V
0,0.101566314697266
V
-1,0
BOT
0,43.0938333333333
V
0,0.101089477539062
V
-1,0
BOT
0,43.1005
V
0,0.100135803222656
V
-1,0
BOT
0,43.1071666666667
V
0,0.09918212890625
V
-1,0
BOT
0,43.1138333333333
V
0,0.0987052917480469
V
-1,0
BOT
0,43.1205
V
0,0.0982284545898438
V
-1,0
BOT
0,43.1271666666667
V
0,0.0972747802734375
V
-1,0
BOT
0,43.1338333333333
V
0,0.0958442687988281
V
-1,0
BOT
0,43.1405
V
0,0.0934600830078125
V
-1,0
BOT
0,43.1471666666667
V
0,0.0905990600585938
V
-1,0
BOT
0,43.1538333333333
V
0,0.0872611999511719
V
-1,0
BOT
0,43.1605
V
0,0.0844001770019531
V
-1,0
BOT
0,43.1671666666667
V
0,0.0820159912109375
V
-1,0
BOT
0,43.1738333333333
V
0,0.080108642578125
V
-1,0
BOT
0,43.1805
V
0,0.0786781311035156
V
-1,0
BOT
0,43.1871666666667
V
0,0.0772476196289063
V
-1,0
BOT
0,43.1938333333333
V
0,0.0758171081542969
V
-1,0
BOT
0,43.2005
V
0,0.0739097595214844
V
-1,0
BOT
0,43.2071666666667
V
0,0.0710487365722656
V
-1,0
BOT
0,43.2138333333333
V
0,0.0681877136230469
V
-1,0
BOT
0,43.2205
V
0,0.0658035278320313
V
-1,0
BOT
0,43.2271666666667
V
0,0.0638961791992188
V
-1,0
BOT
0,43.2338333333333
V
0,0.0619888305664063
V
-1,0
BOT
0,43.2405
V
0,0.0605583190917969
V
-1,0
BOT
0,43.2471666666667
V
0,0.0596046447753906
V
-1,0
BOT
0,43.2538333333333
V
0,0.0586509704589844
V
-1,0
BOT
0,43.2605
V
0,0.0567436218261719
V
-1,0
BOT
0,43.2671666666667
V
0,0.0543594360351563
V
-1,0
BOT
0,43.2738333333333
V
0,0.0510215759277344
V
-1,0
BOT
0,43.2805
V
0,0.0476837158203125
V
-1,0
BOT
0,43.2871666666667
V
0,0.0448226928710938
V
-1,0
BOT
0,43.2938333333333
V
0,0.0424385070800781
V
-1,0
BOT
0,43.3005
V
0,0.0414848327636719
V
-1,0
BOT
0,43.3071666666667
V
0,0.0414848327636719
V
-1,0
BOT
0,43.3138333333333
V
0,0.0410079956054688
V
-1,0
BOT
0,43.3205
V
0,0.0395774841308594
V
-1,0
BOT
0,43.3271666666667
V
0,0.0367164611816406
V
-1,0
BOT
0,43.3338333333333
V
0,0.0338554382324219
V
-1,0
BOT
0,43.3405
V
0,0.0314712524414062
V
-1,0
BOT
0,43.3471666666667
V
0,0.0290870666503906
V
-1,0
BOT
0,43.3538333333333
V
0,0.026702880859375
V
-1,0
BOT
0,43.3605
V
0,0.0252723693847656
V
-1,0
BOT
0,43.3671666666667
V
0,0.0243186950683594
V
-1,0
BOT
0,43.3738333333333
V
0,0.0233650207519531
V
-1,0
BOT
0,43.3805
V
0,0.0233650207519531
V
-1,0
BOT
0,43.3871666666667
V
0,0.0238418579101562
V
-1,0
BOT
0,43.3938333333333
V
0,0.0233650207519531
V
-1,0
BOT
0,43.4005
V
0,0.0224113464355469
V
-1,0
BOT
0,43.4071666666667
V
0,0.0219345092773437
V
-1,0
BOT
0,43.4138333333333
V
0,0.0214576721191406
V
-1,0
BOT
0,43.4205
V
0,0.0200271606445312
V
-1,0
BOT
0,43.4271666666667
V
0,0.0185966491699219
V
-1,0
BOT
0,43.4338333333333
V
0,0.0176429748535156
V
-1,0
BOT
0,43.4405
V
0,0.0171661376953125
V
-1,0
BOT
0,43.4471666666667
V
0,0.0166893005371094
V
-1,0
BOT
0,43.4538333333333
V
0,0.0157356262207031
V
-1,0
BOT
0,43.4605
V
0,0.0152587890625
V
-1,0
BOT
0,43.4671666666667
V
0,0.0147819519042969
V
-1,0
BOT
0,43.4738333333333
V
0,0.0147819519042969
V
-1,0
BOT
0,43.4805
V
0,0.0152587890625
V
-1,0
BOT
0,43.4871666666667
V
0,0.0166893005371094
V
-1,0
BOT
0,43.4938333333333
V
0,0.0171661376953125
V
-1,0
BOT
0,43.5005
V
0,0.0162124633789062
V
-1,0
BOT
0,43.5071666666667
V
0,0.0157356262207031
V
-1,0
BOT
0,43.5138333333333
V
0,0.0157356262207031
V
-1,0
BOT
0,43.5205
V
0,0.0152587890625
V
-1,0
BOT
0,43.5271666666667
V
0,0.0138282775878906
V
-1,0
BOT
0,43.5338333333333
V
0,0.0128746032714844
V
-1,0
BOT
0,43.5405
V
0,0.0128746032714844
V
-1,0
BOT
0,43.5471666666667
V
0,0.0123977661132812
V
-1,0
BOT
0,43.5538333333333
V
0,0.0109672546386719
V
-1,0
BOT
0,43.5605
V
0,0.00905990600585938
V
-1,0
BOT
0,43.5671666666667
V
0,0.00762939453125
V
-1,0
BOT
0,43.5738333333333
V
0,0.00715255737304688
V
-1,0
BOT
0,43.5805
V
0,0.0057220458984375
V
-1,0
BOT
0,43.5871666666667
V
0,0.00476837158203125
V
-1,0
BOT
0,43.5938333333333
V
0,0.00476837158203125
V
-1,0
BOT
0,43.6005
V
0,0.00524520874023438
V
-1,0
BOT
0,43.6071666666667
V
0,0.0057220458984375
V
-1,0
BOT
0,43.6138333333333
V
0,0.00619888305664063
V
-1,0
BOT
0,43.6205
V
0,0.0057220458984375
V
-1,0
BOT
0,43.6271666666667
V
0,0.0057220458984375
V
-1,0
BOT
0,43.6338333333333
V
0,0.00715255737304688
V
-1,0
BOT
0,43.6405
V
0,0.00905990600585938
V
-1,0
BOT
0,43.6471666666667
V
0,0.0109672546386719
V
-1,0
BOT
0,43.6538333333333
V
0,0.0128746032714844
V
-1,0
BOT
0,43.6605
V
0,0.0152587890625
V
-1,0
BOT
0,43.6671666666667
V
0,0.0181198120117187
V
-1,0
BOT
0,43.6738333333333
V
0,0.0200271606445312
V
-1,0
BOT
0,43.6805
V
0,0.0200271606445312
V
-1,0
BOT
0,43.6871666666667
V
0,0.0195503234863281
V
-1,0
BOT
0,43.6938333333333
V
0,0.0195503234863281
V
-1,0
BOT
0,43.7005
V
0,0.0195503234863281
V
-1,0
BOT
0,43.7071666666667
V
0,0.0195503234863281
V
-1,0
BOT
0,43.7138333333333
V
0,0.0205039978027344
V
-1,0
BOT
0,43.7205
V
0,0.0214576721191406
V
-1,0
BOT
0,43.7271666666667
V
0,0.02288818359375
V
-1,0
BOT
0,43.7338333333333
V
0,0.0238418579101562
V
-1,0
BOT
0,43.7405
V
0,0.0252723693847656
V
-1,0
BOT
0,43.7471666666667
V
0,0.026702880859375
V
-1,0
BOT
0,43.7538333333333
V
0,0.026702880859375
V
-1,0
BOT
0,43.7605
V
0,0.0262260437011719
V
-1,0
BOT
0,43.7671666666667
V
0,0.0252723693847656
V
-1,0
BOT
0,43.7738333333333
V
0,0.0243186950683594
V
-1,0
BOT
0,43.7805
V
0,0.02288818359375
V
-1,0
BOT
0,43.7871666666667
V
0,0.0219345092773437
V
-1,0
BOT
0,43.7938333333333
V
0,0.02288818359375
V
-1,0
BOT
0,43.8005
V
0,0.0247955322265625
V
-1,0
BOT
0,43.8071666666667
V
0,0.0271797180175781
V
-1,0
BOT
0,43.8138333333333
V
0,0.0300407409667969
V
-1,0
BOT
0,43.8205
V
0,0.0324249267578125
V
-1,0
BOT
0,43.8271666666667
V
0,0.0348091125488281
V
-1,0
BOT
0,43.8338333333333
V
0,0.0367164611816406
V
-1,0
BOT
0,43.8405
V
0,0.03814697265625
V
-1,0
BOT
0,43.8471666666667
V
0,0.0391006469726562
V
-1,0
BOT
0,43.8538333333333
V
0,0.0405311584472656
V
-1,0
BOT
0,43.8605
V
0,0.0410079956054688
V
-1,0
BOT
0,43.8671666666667
V
0,0.0414848327636719
V
-1,0
BOT
0,43.8738333333333
V
0,0.0410079956054688
V
-1,0
BOT
0,43.8805
V
0,0.0405311584472656
V
-1,0
BOT
0,43.8871666666667
V
0,0.0400543212890625
V
-1,0
BOT
0,43.8938333333333
V
0,0.0395774841308594
V
-1,0
BOT
0,43.9005
V
0,0.03814697265625
V
-1,0
BOT
0,43.9071666666667
V
0,0.0376701354980469
V
-1,0
BOT
0,43.9138333333333
V
0,0.03814697265625
V
-1,0
BOT
0,43.9205
V
0,0.0395774841308594
V
-1,0
BOT
0,43.9271666666667
V
0,0.0424385070800781
V
-1,0
BOT
0,43.9338333333333
V
0,0.0462532043457031
V
-1,0
BOT
0,43.9405
V
0,0.0510215759277344
V
-1,0
BOT
0,43.9471666666667
V
0,0.0553131103515625
V
-1,0
BOT
0,43.9538333333333
V
0,0.0586509704589844
V
-1,0
BOT
0,43.9605
V
0,0.0615119934082031
V
-1,0
BOT
0,43.9671666666667
V
0,0.0638961791992188
V
-1,0
BOT
0,43.9738333333333
V
0,0.0653266906738281
V
-1,0
BOT
0,43.9805
V
0,0.0672340393066406
V
-1,0
BOT
0,43.9871666666667
V
0,0.0700950622558594
V
-1,0
BOT
0,43.9938333333333
V
0,0.0743865966796875
V
-1,0
BOT
0,44.0005
V
0,0.0791549682617188
V
-1,0
BOT
0,44.0071666666667
V
0,0.0829696655273438
V
-1,0
BOT
0,44.0138333333333
V
0,0.0867843627929688
V
-1,0
BOT
0,44.0205
V
0,0.0905990600585938
V
-1,0
BOT
0,44.0271666666667
V
0,0.0939369201660156
V
-1,0
BOT
0,44.0338333333333
V
0,0.0977516174316406
V
-1,0
BOT
0,44.0405
V
0,0.101566314697266
V
-1,0
BOT
0,44.0471666666667
V
0,0.106334686279297
V
-1,0
BOT
0,44.0538333333333
V
0,0.111103057861328
V
-1,0
BOT
0,44.0605
V
0,0.114917755126953
V
-1,0
BOT
0,44.0671666666667
V
0,0.118732452392578
V
-1,0
BOT
0,44.0738333333333
V
0,0.123023986816406
V
-1,0
BOT
0,44.0805
V
0,0.126838684082031
V
-1,0
BOT
0,44.0871666666667
V
0,0.130176544189453
V
-1,0
BOT
0,44.0938333333333
V
0,0.134944915771484
V
-1,0
BOT
0,44.1005
V
0,0.140666961669922
V
-1,0
BOT
0,44.1071666666667
V
0,0.147819519042969
V
-1,0
BOT
0,44.1138333333333
V
0,0.154018402099609
V
-1,0
BOT
0,44.1205
V
0,0.159740447998047
V
-1,0
BOT
0,44.1271666666667
V
0,0.165939331054687
V
-1,0
BOT
0,44.1338333333333
V
0,0.173091888427734
V
-1,0
BOT
0,44.1405
V
0,0.179767608642578
V
-1,0
BOT
0,44.1471666666667
V
0,0.185966491699219
V
-1,0
BOT
0,44.1538333333333
V
0,0.192165374755859
V
-1,0
BOT
0,44.1605
V
0,0.1983642578125
V
-1,0
BOT
0,44.1671666666667
V
0,0.204086303710937
V
-1,0
BOT
0,44.1738333333333
V
0,0.208377838134766
V
-1,0
BOT
0,44.1805
V
0,0.212669372558594
V
-1,0
BOT
0,44.1871666666667
V
0,0.216484069824219
V
-1,0
BOT
0,44.1938333333333
V
0,0.219821929931641
V
-1,0
BOT
0,44.2005
V
0,0.223159790039062
V
-1,0
BOT
0,44.2071666666667
V
0,0.225543975830078
V
-1,0
BOT
0,44.2138333333333
V
0,0.226020812988281
V
-1,0
BOT
0,44.2205
V
0,0.226020812988281
V
-1,0
BOT
0,44.2271666666667
V
0,0.225543975830078
V
-1,0
BOT
0,44.2338333333333
V
0,0.225067138671875
V
-1,0
BOT
0,44.2405
V
0,0.224113464355469
V
-1,0
BOT
0,44.2471666666667
V
0,0.223636627197266
V
-1,0
BOT
0,44.2538333333333
V
0,0.223159790039062
V
-1,0
BOT
0,44.2605
V
0,0.223636627197266
V
-1,0
BOT
0,44.2671666666667
V
0,0.224113464355469
V
-1,0
BOT
0,44.2738333333333
V
0,0.224590301513672
V
-1,0
BOT
0,44.2805
V
0,0.223159790039062
V
-1,0
BOT
0,44.2871666666667
V
0,0.22125244140625
V
-1,0
BOT
0,44.2938333333333
V
0,0.219821929931641
V
-1,0
BOT
0,44.3005
V
0,0.219345092773437
V
-1,0
BOT
0,44.3071666666667
V
0,0.218391418457031
V
-1,0
BOT
0,44.3138333333333
V
0,0.217914581298828
V
-1,0
BOT
0,44.3205
V
0,0.217914581298828
V
-1,0
BOT
0,44.3271666666667
V
0,0.217914581298828
V
-1,0
BOT
0,44.3338333333333
V
0,0.217914581298828
V
-1,0
BOT
0,44.3405
V
0,0.216960906982422
V
-1,0
BOT
0,44.3471666666667
V
0,0.215530395507812
V
-1,0
BOT
0,44.3538333333333
V
0,0.213623046875
V
-1,0
BOT
0,44.3605
V
0,0.211715698242187
V
-1,0
BOT
0,44.3671666666667
V
0,0.210762023925781
V
-1,0
BOT
0,44.3738333333333
V
0,0.210762023925781
V
-1,0
BOT
0,44.3805
V
0,0.211715698242187
V
-1,0
BOT
0,44.3871666666667
V
0,0.213146209716797
V
-1,0
BOT
0,44.3938333333333
V
0,0.215530395507812
V
-1,0
BOT
0,44.4005
V
0,0.217914581298828
V
-1,0
BOT
0,44.4071666666667
V
0,0.22125244140625
V
-1,0
BOT
0,44.4138333333333
V
0,0.224113464355469
V
-1,0
BOT
0,44.4205
V
0,0.226020812988281
V
-1,0
BOT
0,44.4271666666667
V
0,0.227451324462891
V
-1,0
BOT
0,44.4338333333333
V
0,0.229835510253906
V
-1,0
BOT
0,44.4405
V
0,0.231742858886719
V
-1,0
BOT
0,44.4471666666667
V
0,0.233173370361328
V
-1,0
BOT
0,44.4538333333333
V
0,0.234127044677734
V
-1,0
BOT
0,44.4605
V
0,0.235080718994141
V
-1,0
BOT
0,44.4671666666667
V
0,0.236034393310547
V
-1,0
BOT
0,44.4738333333333
V
0,0.236034393310547
V
-1,0
BOT
0,44.4805
V
0,0.236034393310547
V
-1,0
BOT
0,44.4871666666667
V
0,0.23651123046875
V
-1,0
BOT
0,44.4938333333333
V
0,0.237941741943359
V
-1,0
BOT
0,44.5005
V
0,0.238895416259766
V
-1,0
BOT
0,44.5071666666667
V
0,0.240802764892578
V
-1,0
BOT
0,44.5138333333333
V
0,0.242710113525391
V
-1,0
BOT
0,44.5205
V
0,0.245094299316406
V
-1,0
BOT
0,44.5271666666667
V
0,0.246524810791016
V
-1,0
BOT
0,44.5338333333333
V
0,0.247955322265625
V
-1,0
BOT
0,44.5405
V
0,0.249862670898437
V
-1,0
BOT
0,44.5471666666667
V
0,0.251293182373047
V
-1,0
BOT
0,44.5538333333333
V
0,0.25177001953125
V
-1,0
BOT
0,44.5605
V
0,0.252246856689453
V
-1,0
BOT
0,44.5671666666667
V
0,0.253677368164062
V
-1,0
BOT
0,44.5738333333333
V
0,0.255584716796875
V
-1,0
BOT
0,44.5805
V
0,0.257492065429687
V
-1,0
BOT
0,44.5871666666667
V
0,0.260353088378906
V
-1,0
BOT
0,44.5938333333333
V
0,0.263214111328125
V
-1,0
BOT
0,44.6005
V
0,0.265598297119141
V
-1,0
BOT
0,44.6071666666667
V
0,0.266551971435547
V
-1,0
BOT
0,44.6138333333333
V
0,0.26702880859375
V
-1,0
BOT
0,44.6205
V
0,0.267505645751953
V
-1,0
BOT
0,44.6271666666667
V
0,0.267505645751953
V
-1,0
BOT
0,44.6338333333333
V
0,0.269412994384766
V
-1,0
BOT
0,44.6405
V
0,0.272750854492187
V
-1,0
BOT
0,44.6471666666667
V
0,0.277042388916016
V
-1,0
BOT
0,44.6538333333333
V
0,0.281333923339844
V
-1,0
BOT
0,44.6605
V
0,0.287055969238281
V
-1,0
BOT
0,44.6671666666667
V
0,0.292301177978516
V
-1,0
BOT
0,44.6738333333333
V
0,0.297069549560547
V
-1,0
BOT
0,44.6805
V
0,0.301361083984375
V
-1,0
BOT
0,44.6871666666667
V
0,0.306129455566406
V
-1,0
BOT
0,44.6938333333333
V
0,0.311851501464844
V
-1,0
BOT
0,44.7005
V
0,0.318527221679687
V
-1,0
BOT
0,44.7071666666667
V
0,0.325679779052734
V
-1,0
BOT
0,44.7138333333333
V
0,0.333309173583984
V
-1,0
BOT
0,44.7205
V
0,0.342369079589844
V
-1,0
BOT
0,44.7271666666667
V
0,0.352859497070312
V
-1,0
BOT
0,44.7338333333333
V
0,0.363349914550781
V
-1,0
BOT
0,44.7405
V
0,0.37384033203125
V
-1,0
BOT
0,44.7471666666667
V
0,0.385284423828125
V
-1,0
BOT
0,44.7538333333333
V
0,0.397682189941406
V
-1,0
BOT
0,44.7605
V
0,0.408649444580078
V
-1,0
BOT
0,44.7671666666667
V
0,0.418186187744141
V
-1,0
BOT
0,44.7738333333333
V
0,0.42724609375
V
-1,0
BOT
0,44.7805
V
0,0.435352325439453
V
-1,0
BOT
0,44.7871666666667
V
0,0.4425048828125
V
-1,0
BOT
0,44.7938333333333
V
0,0.447273254394531
V
-1,0
BOT
0,44.8005
V
0,0.451564788818359
V
-1,0
BOT
0,44.8071666666667
V
0,0.456333160400391
V
-1,0
BOT
0,44.8138333333333
V
0,0.461578369140625
V
-1,0
BOT
0,44.8205
V
0,0.466346740722656
V
-1,0
BOT
0,44.8271666666667
V
0,0.471115112304688
V
-1,0
BOT
0,44.8338333333333
V
0,0.478267669677734
V
-1,0
BOT
0,44.8405
V
0,0.48828125
V
-1,0
BOT
0,44.8471666666667
V
0,0.501155853271484
V
-1,0
BOT
0,44.8538333333333
V
0,0.518798828125
V
-1,0
BOT
0,44.8605
V
0,0.542640686035156
V
-1,0
BOT
0,44.8671666666667
V
0,0.578880310058594
V
-1,0
BOT
0,44.8738333333333
V
0,0.634670257568359
V
-1,0
BOT
0,44.8805
V
0,0.717639923095703
V
-1,0
BOT
0,44.8871666666667
V
0,0.838756561279297
V
-1,0
BOT
0,44.8938333333333
V
0,1.01566314697266
V
-1,0
BOT
0,44.9005
V
0,1.27029418945312
V
-1,0
BOT
0,44.9071666666667
V
0,1.62982940673828
V
-1,0
BOT
0,44.9138333333333
V
0,2.12717056274414
V
-1,0
BOT
0,44.9205
V
0,2.80380249023437
V
-1,0
BOT
0,44.9271666666667
V
0,3.70407104492187
V
-1,0
BOT
0,44.9338333333333
V
0,4.87565994262695
V
-1,0
BOT
0,44.9405
V
0,6.36434555053711
V
-1,0
BOT
0,44.9471666666667
V
0,8.20732116699219
V
-1,0
BOT
0,44.9538333333333
V
0,10.4284286499023
V
-1,0
BOT
0,44.9605
V
0,13.0305290222168
V
-1,0
BOT
0,44.9671666666667
V
0,15.9931182861328
V
-1,0
BOT
0,44.9738333333333
V
0,19.2651748657227
V
-1,0
BOT
0,44.9805
V
0,22.7618217468262
V
-1,0
BOT
0,44.9871666666667
V
0,26.3676643371582
V
-1,0
BOT
0,44.9938333333333
V
0,29.9453735351562
V
-1,0
BOT
0,45.0005
V
0,33.3414077758789
V
-1,0
BOT
0,45.0071666666667
V
0,36.3974571228027
V
-1,0
BOT
0,45.0138333333333
V
0,38.966178894043
V
-1,0
BOT
0,45.0205
V
0,40.9231185913086
V
-1,0
BOT
0,45.0271666666667
V
0,42.180061340332
V
-1,0
BOT
0,45.0338333333333
V
0,42.6888465881348
V
-1,0
BOT
0,45.0405
V
0,42.4461364746094
V
-1,0
BOT
0,45.0471666666667
V
0,41.4943695068359
V
-1,0
BOT
0,45.0538333333333
V
0,39.9141311645508
V
-1,0
BOT
0,45.0605
V
0,37.8127098083496
V
-1,0
BOT
0,45.0671666666667
V
0,35.3145599365234
V
-1,0
BOT
0,45.0738333333333
V
0,32.5508117675781
V
-1,0
BOT
0,45.0805
V
0,29.6473503112793
V
-1,0
BOT
0,45.0871666666667
V
0,26.7162322998047
V
-1,0
BOT
0,45.0938333333333
V
0,23.8485336303711
V
-1,0
BOT
0,45.1005
V
0,21.1153030395508
V
-1,0
BOT
0,45.1071666666667
V
0,18.5670852661133
V
-1,0
BOT
0,45.1138333333333
V
0,16.2334442138672
V
-1,0
BOT
0,45.1205
V
0,14.1282081604004
V
-1,0
BOT
0,45.1271666666667
V
0,12.2513771057129
V
-1,0
BOT
0,45.1338333333333
V
0,10.5953216552734
V
-1,0
BOT
0,45.1405
V
0,9.14669036865234
V
-1,0
BOT
0,45.1471666666667
V
0,7.88688659667969
V
-1,0
BOT
0,45.1538333333333
V
0,6.79636001586914
V
-1,0
BOT
0,45.1605
V
0,5.85556030273438
V
-1,0
BOT
0,45.1671666666667
V
0,5.04779815673828
V
-1,0
BOT
0,45.1738333333333
V
0,4.35543060302734
V
-1,0
BOT
0,45.1805
V
0,3.76510620117187
V
-1,0
BOT
0,45.1871666666667
V
0,3.26347351074219
V
-1,0
BOT
0,45.1938333333333
V
0,2.84004211425781
V
-1,0
BOT
0,45.2005
V
0,2.48479843139648
V
-1,0
BOT
0,45.2071666666667
V
0,2.18915939331055
V
-1,0
BOT
0,45.2138333333333
V
0,1.94358825683594
V
-1,0
BOT
0,45.2205
V
0,1.7399787902832
V
-1,0
BOT
0,45.2271666666667
V
0,1.5711784362793
V
-1,0
BOT
0,45.2338333333333
V
0,1.43194198608398
V
-1,0
BOT
0,45.2405
V
0,1.31750106811523
V
-1,0
BOT
0,45.2471666666667
V
0,1.22356414794922
V
-1,0
BOT
0,45.2538333333333
V
0,1.14631652832031
V
-1,0
BOT
0,45.2605
V
0,1.08194351196289
V
-1,0
BOT
0,45.2671666666667
V
0,1.02853775024414
V
-1,0
BOT
0,45.2738333333333
V
0,0.984668731689453
V
-1,0
BOT
0,45.2805
V
0,0.948429107666016
V
-1,0
BOT
0,45.2871666666667
V
0,0.916957855224609
V
-1,0
BOT
0,45.2938333333333
V
0,0.889778137207031
V
-1,0
BOT
0,45.3005
V
0,0.867366790771484
V
-1,0
BOT
0,45.3071666666667
V
0,0.848770141601563
V
-1,0
BOT
0,45.3138333333333
V
0,0.83160400390625
V
-1,0
BOT
0,45.3205
V
0,0.815868377685547
V
-1,0
BOT
0,45.3271666666667
V
0,0.80108642578125
V
-1,0
BOT
0,45.3338333333333
V
0,0.786781311035156
V
-1,0
BOT
0,45.3405
V
0,0.773429870605469
V
-1,0
BOT
0,45.3471666666667
V
0,0.761032104492188
V
-1,0
BOT
0,45.3538333333333
V
0,0.750064849853516
V
-1,0
BOT
0,45.3605
V
0,0.741481781005859
V
-1,0
BOT
0,45.3671666666667
V
0,0.734329223632813
V
-1,0
BOT
0,45.3738333333333
V
0,0.728130340576172
V
-1,0
BOT
0,45.3805
V
0,0.721454620361328
V
-1,0
BOT
0,45.3871666666667
V
0,0.716209411621094
V
-1,0
BOT
0,45.3938333333333
V
0,0.711917877197266
V
-1,0
BOT
0,45.4005
V
0,0.709056854248047
V
-1,0
BOT
0,45.4071666666667
V
0,0.708103179931641
V
-1,0
BOT
0,45.4138333333333
V
0,0.708580017089844
V
-1,0
BOT
0,45.4205
V
0,0.709056854248047
V
-1,0
BOT
0,45.4271666666667
V
0,0.710010528564453
V
-1,0
BOT
0,45.4338333333333
V
0,0.710010528564453
V
-1,0
BOT
0,45.4405
V
0,0.708103179931641
V
-1,0
BOT
0,45.4471666666667
V
0,0.705242156982422
V
-1,0
BOT
0,45.4538333333333
V
0,0.703334808349609
V
-1,0
BOT
0,45.4605
V
0,0.702381134033203
V
-1,0
BOT
0,45.4671666666667
V
0,0.702857971191406
V
-1,0
BOT
0,45.4738333333333
V
0,0.704765319824219
V
-1,0
BOT
0,45.4805
V
0,0.708103179931641
V
-1,0
BOT
0,45.4871666666667
V
0,0.712871551513672
V
-1,0
BOT
0,45.4938333333333
V
0,0.719070434570313
V
-1,0
BOT
0,45.5005
V
0,0.727653503417969
V
-1,0
BOT
0,45.5071666666667
V
0,0.739097595214844
V
-1,0
BOT
0,45.5138333333333
V
0,0.752449035644531
V
-1,0
BOT
0,45.5205
V
0,0.766754150390625
V
-1,0
BOT
0,45.5271666666667
V
0,0.781536102294922
V
-1,0
BOT
0,45.5338333333333
V
0,0.797271728515625
V
-1,0
BOT
0,45.5405
V
0,0.813961029052734
V
-1,0
BOT
0,45.5471666666667
V
0,0.830650329589844
V
-1,0
BOT
0,45.5538333333333
V
0,0.84686279296875
V
-1,0
BOT
0,45.5605
V
0,0.863552093505859
V
-1,0
BOT
0,45.5671666666667
V
0,0.879287719726563
V
-1,0
BOT
0,45.5738333333333
V
0,0.892162322998047
V
-1,0
BOT
0,45.5805
V
0,0.901699066162109
V
-1,0
BOT
0,45.5871666666667
V
0,0.90789794921875
V
-1,0
BOT
0,45.5938333333333
V
0,0.911235809326172
V
-1,0
BOT
0,45.6005
V
0,0.911712646484375
V
-1,0
BOT
0,45.6071666666667
V
0,0.911235809326172
V
-1,0
BOT
0,45.6138333333333
V
0,0.909328460693359
V
-1,0
BOT
0,45.6205
V
0,0.905513763427734
V
-1,0
BOT
0,45.6271666666667
V
0,0.898361206054688
V
-1,0
BOT
0,45.6338333333333
V
0,0.889301300048828
V
-1,0
BOT
0,45.6405
V
0,0.878334045410156
V
-1,0
BOT
0,45.6471666666667
V
0,0.866413116455078
V
-1,0
BOT
0,45.6538333333333
V
0,0.8544921875
V
-1,0
BOT
0,45.6605
V
0,0.844001770019531
V
-1,0
BOT
0,45.6671666666667
V
0,0.837802886962891
V
-1,0
BOT
0,45.6738333333333
V
0,0.837326049804688
V
-1,0
BOT
0,45.6805
V
0,0.844478607177734
V
-1,0
BOT
0,45.6871666666667
V
0,0.860691070556641
V
-1,0
BOT
0,45.6938333333333
V
0,0.890731811523438
V
-1,0
BOT
0,45.7005
V
0,0.937461853027344
V
-1,0
BOT
0,45.7071666666667
V
0,1.00183486938477
V
-1,0
BOT
0,45.7138333333333
V
0,1.0838508605957
V
-1,0
BOT
0,45.7205
V
0,1.18160247802734
V
-1,0
BOT
0,45.7271666666667
V
0,1.29270553588867
V
-1,0
BOT
0,45.7338333333333
V
0,1.41143798828125
V
-1,0
BOT
0,45.7405
V
0,1.52921676635742
V
-1,0
BOT
0,45.7471666666667
V
0,1.63650512695312
V
-1,0
BOT
0,45.7538333333333
V
0,1.72519683837891
V
-1,0
BOT
0,45.7605
V
0,1.78861618041992
V
-1,0
BOT
0,45.7671666666667
V
0,1.82056427001953
V
-1,0
BOT
0,45.7738333333333
V
0,1.81770324707031
V
-1,0
BOT
0,45.7805
V
0,1.78050994873047
V
-1,0
BOT
0,45.7871666666667
V
0,1.71470642089844
V
-1,0
BOT
0,45.7938333333333
V
0,1.62649154663086
V
-1,0
BOT
0,45.8005
V
0,1.52206420898437
V
-1,0
BOT
0,45.8071666666667
V
0,1.40857696533203
V
-1,0
BOT
0,45.8138333333333
V
0,1.29318237304687
V
-1,0
BOT
0,45.8205
V
0,1.18112564086914
V
-1,0
BOT
0,45.8271666666667
V
0,1.07669830322266
V
-1,0
BOT
0,45.8338333333333
V
0,0.982284545898438
V
-1,0
BOT
0,45.8405
V
0,0.899791717529297
V
-1,0
BOT
0,45.8471666666667
V
0,0.829219818115234
V
-1,0
BOT
0,45.8538333333333
V
0,0.771045684814453
V
-1,0
BOT
0,45.8605
V
0,0.723838806152344
V
-1,0
BOT
0,45.8671666666667
V
0,0.6866455078125
V
-1,0
BOT
0,45.8738333333333
V
0,0.658512115478516
V
-1,0
BOT
0,45.8805
V
0,0.638484954833984
V
-1,0
BOT
0,45.8871666666667
V
0,0.624656677246094
V
-1,0
BOT
0,45.8938333333333
V
0,0.616073608398438
V
-1,0
BOT
0,45.9005
V
0,0.612258911132813
V
-1,0
BOT
0,45.9071666666667
V
0,0.613689422607422
V
-1,0
BOT
0,45.9138333333333
V
0,0.618934631347656
V
-1,0
BOT
0,45.9205
V
0,0.630378723144531
V
-1,0
BOT
0,45.9271666666667
V
0,0.649452209472656
V
-1,0
BOT
0,45.9338333333333
V
0,0.677108764648438
V
-1,0
BOT
0,45.9405
V
0,0.713348388671875
V
-1,0
BOT
0,45.9471666666667
V
0,0.756263732910156
V
-1,0
BOT
0,45.9538333333333
V
0,0.804901123046875
V
-1,0
BOT
0,45.9605
V
0,0.856399536132813
V
-1,0
BOT
0,45.9671666666667
V
0,0.908851623535156
V
-1,0
BOT
0,45.9738333333333
V
0,0.957965850830078
V
-1,0
BOT
0,45.9805
V
0,1.00183486938477
V
-1,0
BOT
0,45.9871666666667
V
0,1.03855133056641
V
-1,0
BOT
0,45.9938333333333
V
0,1.06716156005859
V
-1,0
BOT
0,46.0005
V
0,1.08766555786133
V
-1,0
BOT
0,46.0071666666667
V
0,1.0986328125
V
-1,0
BOT
0,46.0138333333333
V
0,1.10054016113281
V
-1,0
BOT
0,46.0205
V
0,1.09481811523437
V
-1,0
BOT
0,46.0271666666667
V
0,1.08051300048828
V
-1,0
BOT
0,46.0338333333333
V
0,1.05762481689453
V
-1,0
BOT
0,46.0405
V
0,1.02663040161133
V
-1,0
BOT
0,46.0471666666667
V
0,0.988006591796875
V
-1,0
BOT
0,46.0538333333333
V
0,0.943660736083984
V
-1,0
BOT
0,46.0605
V
0,0.894069671630859
V
-1,0
BOT
0,46.0671666666667
V
0,0.841140747070313
V
-1,0
BOT
0,46.0738333333333
V
0,0.787258148193359
V
-1,0
BOT
0,46.0805
V
0,0.735282897949219
V
-1,0
BOT
0,46.0871666666667
V
0,0.6866455078125
V
-1,0
BOT
0,46.0938333333333
V
0,0.642776489257813
V
-1,0
BOT
0,46.1005
V
0,0.604629516601563
V
-1,0
BOT
0,46.1071666666667
V
0,0.572681427001953
V
-1,0
BOT
0,46.1138333333333
V
0,0.547409057617188
V
-1,0
BOT
0,46.1205
V
0,0.529766082763672
V
-1,0
BOT
0,46.1271666666667
V
0,0.518798828125
V
-1,0
BOT
0,46.1338333333333
V
0,0.514507293701172
V
-1,0
BOT
0,46.1405
V
0,0.515937805175781
V
-1,0
BOT
0,46.1471666666667
V
0,0.524044036865234
V
-1,0
BOT
0,46.1538333333333
V
0,0.537872314453125
V
-1,0
BOT
0,46.1605
V
0,0.554084777832031
V
-1,0
BOT
0,46.1671666666667
V
0,0.571250915527344
V
-1,0
BOT
0,46.1738333333333
V
0,0.58746337890625
V
-1,0
BOT
0,46.1805
V
0,0.601768493652344
V
-1,0
BOT
0,46.1871666666667
V
0,0.612735748291016
V
-1,0
BOT
0,46.1938333333333
V
0,0.619888305664063
V
-1,0
BOT
0,46.2005
V
0,0.623226165771484
V
-1,0
BOT
0,46.2071666666667
V
0,0.624656677246094
V
-1,0
BOT
0,46.2138333333333
V
0,0.624656677246094
V
-1,0
BOT
0,46.2205
V
0,0.622749328613281
V
-1,0
BOT
0,46.2271666666667
V
0,0.619888305664063
V
-1,0
BOT
0,46.2338333333333
V
0,0.617027282714844
V
-1,0
BOT
0,46.2405
V
0,0.613212585449219
V
-1,0
BOT
0,46.2471666666667
V
0,0.607490539550781
V
-1,0
BOT
0,46.2538333333333
V
0,0.599861145019531
V
-1,0
BOT
0,46.2605
V
0,0.593185424804688
V
-1,0
BOT
0,46.2671666666667
V
0,0.586509704589844
V
-1,0
BOT
0,46.2738333333333
V
0,0.578880310058594
V
-1,0
BOT
0,46.2805
V
0,0.571250915527344
V
-1,0
BOT
0,46.2871666666667
V
0,0.5645751953125
V
-1,0
BOT
0,46.2938333333333
V
0,0.559806823730469
V
-1,0
BOT
0,46.3005
V
0,0.556468963623047
V
-1,0
BOT
0,46.3071666666667
V
0,0.555038452148438
V
-1,0
BOT
0,46.3138333333333
V
0,0.554561614990234
V
-1,0
BOT
0,46.3205
V
0,0.55694580078125
V
-1,0
BOT
0,46.3271666666667
V
0,0.562191009521484
V
-1,0
BOT
0,46.3338333333333
V
0,0.571250915527344
V
-1,0
BOT
0,46.3405
V
0,0.583171844482422
V
-1,0
BOT
0,46.3471666666667
V
0,0.597953796386719
V
-1,0
BOT
0,46.3538333333333
V
0,0.616073608398438
V
-1,0
BOT
0,46.3605
V
0,0.634193420410156
V
-1,0
BOT
0,46.3671666666667
V
0,0.651359558105469
V
-1,0
BOT
0,46.3738333333333
V
0,0.666141510009766
V
-1,0
BOT
0,46.3805
V
0,0.67901611328125
V
-1,0
BOT
0,46.3871666666667
V
0,0.689506530761719
V
-1,0
BOT
0,46.3938333333333
V
0,0.696659088134766
V
-1,0
BOT
0,46.4005
V
0,0.699996948242188
V
-1,0
BOT
0,46.4071666666667
V
0,0.699996948242188
V
-1,0
BOT
0,46.4138333333333
V
0,0.696659088134766
V
-1,0
BOT
0,46.4205
V
0,0.688552856445313
V
-1,0
BOT
0,46.4271666666667
V
0,0.675201416015625
V
-1,0
BOT
0,46.4338333333333
V
0,0.657558441162109
V
-1,0
BOT
0,46.4405
V
0,0.637531280517578
V
-1,0
BOT
0,46.4471666666667
V
0,0.617027282714844
V
-1,0
BOT
0,46.4538333333333
V
0,0.595569610595703
V
-1,0
BOT
0,46.4605
V
0,0.574111938476563
V
-1,0
BOT
0,46.4671666666667
V
0,0.555038452148438
V
-1,0
BOT
0,46.4738333333333
V
0,0.538349151611328
V
-1,0
BOT
0,46.4805
V
0,0.524044036865234
V
-1,0
BOT
0,46.4871666666667
V
0,0.511646270751953
V
-1,0
BOT
0,46.4938333333333
V
0,0.501155853271484
V
-1,0
BOT
0,46.5005
V
0,0.492572784423828
V
-1,0
BOT
0,46.5071666666667
V
0,0.485420227050781
V
-1,0
BOT
0,46.5138333333333
V
0,0.479698181152344
V
-1,0
BOT
0,46.5205
V
0,0.477790832519531
V
-1,0
BOT
0,46.5271666666667
V
0,0.479221343994141
V
-1,0
BOT
0,46.5338333333333
V
0,0.483989715576172
V
-1,0
BOT
0,46.5405
V
0,0.491619110107422
V
-1,0
BOT
0,46.5471666666667
V
0,0.5035400390625
V
-1,0
BOT
0,46.5538333333333
V
0,0.518798828125
V
-1,0
BOT
0,46.5605
V
0,0.535488128662109
V
-1,0
BOT
0,46.5671666666667
V
0,0.553131103515625
V
-1,0
BOT
0,46.5738333333333
V
0,0.572681427001953
V
-1,0
BOT
0,46.5805
V
0,0.594139099121094
V
-1,0
BOT
0,46.5871666666667
V
0,0.618457794189453
V
-1,0
BOT
0,46.5938333333333
V
0,0.645160675048828
V
-1,0
BOT
0,46.6005
V
0,0.672817230224609
V
-1,0
BOT
0,46.6071666666667
V
0,0.701427459716797
V
-1,0
BOT
0,46.6138333333333
V
0,0.727176666259766
V
-1,0
BOT
0,46.6205
V
0,0.748157501220703
V
-1,0
BOT
0,46.6271666666667
V
0,0.760555267333984
V
-1,0
BOT
0,46.6338333333333
V
0,0.765323638916016
V
-1,0
BOT
0,46.6405
V
0,0.763416290283203
V
-1,0
BOT
0,46.6471666666667
V
0,0.75531005859375
V
-1,0
BOT
0,46.6538333333333
V
0,0.742912292480469
V
-1,0
BOT
0,46.6605
V
0,0.730037689208984
V
-1,0
BOT
0,46.6671666666667
V
0,0.719070434570313
V
-1,0
BOT
0,46.6738333333333
V
0,0.713348388671875
V
-1,0
BOT
0,46.6805
V
0,0.713825225830078
V
-1,0
BOT
0,46.6871666666667
V
0,0.72479248046875
V
-1,0
BOT
0,46.6938333333333
V
0,0.749111175537109
V
-1,0
BOT
0,46.7005
V
0,0.787258148193359
V
-1,0
BOT
0,46.7071666666667
V
0,0.838756561279297
V
-1,0
BOT
0,46.7138333333333
V
0,0.901222229003906
V
-1,0
BOT
0,46.7205
V
0,0.972270965576172
V
-1,0
BOT
0,46.7271666666667
V
0,1.04618072509766
V
-1,0
BOT
0,46.7338333333333
V
0,1.11722946166992
V
-1,0
BOT
0,46.7405
V
0,1.18017196655273
V
-1,0
BOT
0,46.7471666666667
V
0,1.22976303100586
V
-1,0
BOT
0,46.7538333333333
V
0,1.26123428344727
V
-1,0
BOT
0,46.7605
V
0,1.27267837524414
V
-1,0
BOT
0,46.7671666666667
V
0,1.26409530639648
V
-1,0
BOT
0,46.7738333333333
V
0,1.23739242553711
V
-1,0
BOT
0,46.7805
V
0,1.19543075561523
V
-1,0
BOT
0,46.7871666666667
V
0,1.14297866821289
V
-1,0
BOT
0,46.7938333333333
V
0,1.0838508605957
V
-1,0
BOT
0,46.8005
V
0,1.0228157043457
V
-1,0
BOT
0,46.8071666666667
V
0,0.961780548095703
V
-1,0
BOT
0,46.8138333333333
V
0,0.902652740478516
V
-1,0
BOT
0,46.8205
V
0,0.846385955810547
V
-1,0
BOT
0,46.8271666666667
V
0,0.795364379882813
V
-1,0
BOT
0,46.8338333333333
V
0,0.749588012695313
V
-1,0
BOT
0,46.8405
V
0,0.710010528564453
V
-1,0
BOT
0,46.8471666666667
V
0,0.676631927490234
V
-1,0
BOT
0,46.8538333333333
V
0,0.64849853515625
V
-1,0
BOT
0,46.8605
V
0,0.626087188720703
V
-1,0
BOT
0,46.8671666666667
V
0,0.608444213867188
V
-1,0
BOT
0,46.8738333333333
V
0,0.594139099121094
V
-1,0
BOT
0,46.8805
V
0,0.583648681640625
V
-1,0
BOT
0,46.8871666666667
V
0,0.576972961425781
V
-1,0
BOT
0,46.8938333333333
V
0,0.571727752685547
V
-1,0
BOT
0,46.9005
V
0,0.568866729736328
V
-1,0
BOT
0,46.9071666666667
V
0,0.566959381103516
V
-1,0
BOT
0,46.9138333333333
V
0,0.566005706787109
V
-1,0
BOT
0,46.9205
V
0,0.565052032470703
V
-1,0
BOT
0,46.9271666666667
V
0,0.564098358154297
V
-1,0
BOT
0,46.9338333333333
V
0,0.563144683837891
V
-1,0
BOT
0,46.9405
V
0,0.563144683837891
V
-1,0
BOT
0,46.9471666666667
V
0,0.5645751953125
V
-1,0
BOT
0,46.9538333333333
V
0,0.569343566894531
V
-1,0
BOT
0,46.9605
V
0,0.577449798583984
V
-1,0
BOT
0,46.9671666666667
V
0,0.588893890380859
V
-1,0
BOT
0,46.9738333333333
V
0,0.603199005126953
V
-1,0
BOT
0,46.9805
V
0,0.618934631347656
V
-1,0
BOT
0,46.9871666666667
V
0,0.634193420410156
V
-1,0
BOT
0,46.9938333333333
V
0,0.647068023681641
V
-1,0
BOT
0,47.0005
V
0,0.655651092529297
V
-1,0
BOT
0,47.0071666666667
V
0,0.660419464111328
V
-1,0
BOT
0,47.0138333333333
V
0,0.659942626953125
V
-1,0
BOT
0,47.0205
V
0,0.655174255371094
V
-1,0
BOT
0,47.0271666666667
V
0,0.645160675048828
V
-1,0
BOT
0,47.0338333333333
V
0,0.632762908935547
V
-1,0
BOT
0,47.0405
V
0,0.61798095703125
V
-1,0
BOT
0,47.0471666666667
V
0,0.603199005126953
V
-1,0
BOT
0,47.0538333333333
V
0,0.588893890380859
V
-1,0
BOT
0,47.0605
V
0,0.576019287109375
V
-1,0
BOT
0,47.0671666666667
V
0,0.5645751953125
V
-1,0
BOT
0,47.0738333333333
V
0,0.556468963623047
V
-1,0
BOT
0,47.0805
V
0,0.551223754882813
V
-1,0
BOT
0,47.0871666666667
V
0,0.548362731933594
V
-1,0
BOT
0,47.0938333333333
V
0,0.548362731933594
V
-1,0
BOT
0,47.1005
V
0,0.549793243408203
V
-1,0
BOT
0,47.1071666666667
V
0,0.553131103515625
V
-1,0
BOT
0,47.1138333333333
V
0,0.557422637939453
V
-1,0
BOT
0,47.1205
V
0,0.561237335205078
V
-1,0
BOT
0,47.1271666666667
V
0,0.564098358154297
V
-1,0
BOT
0,47.1338333333333
V
0,0.565052032470703
V
-1,0
BOT
0,47.1405
V
0,0.565528869628906
V
-1,0
BOT
0,47.1471666666667
V
0,0.565052032470703
V
-1,0
BOT
0,47.1538333333333
V
0,0.564098358154297
V
-1,0
BOT
0,47.1605
V
0,0.561714172363281
V
-1,0
BOT
0,47.1671666666667
V
0,0.559329986572266
V
-1,0
BOT
0,47.1738333333333
V
0,0.556468963623047
V
-1,0
BOT
0,47.1805
V
0,0.552654266357422
V
-1,0
BOT
0,47.1871666666667
V
0,0.548839569091797
V
-1,0
BOT
0,47.1938333333333
V
0,0.543594360351563
V
-1,0
BOT
0,47.2005
V
0,0.538349151611328
V
-1,0
BOT
0,47.2071666666667
V
0,0.533103942871094
V
-1,0
BOT
0,47.2138333333333
V
0,0.527858734130859
V
-1,0
BOT
0,47.2205
V
0,0.524044036865234
V
-1,0
BOT
0,47.2271666666667
V
0,0.521183013916016
V
-1,0
BOT
0,47.2338333333333
V
0,0.519752502441406
V
-1,0
BOT
0,47.2405
V
0,0.519752502441406
V
-1,0
BOT
0,47.2471666666667
V
0,0.522136688232422
V
-1,0
BOT
0,47.2538333333333
V
0,0.52642822265625
V
-1,0
BOT
0,47.2605
V
0,0.530719757080078
V
-1,0
BOT
0,47.2671666666667
V
0,0.535964965820313
V
-1,0
BOT
0,47.2738333333333
V
0,0.54168701171875
V
-1,0
BOT
0,47.2805
V
0,0.546932220458984
V
-1,0
BOT
0,47.2871666666667
V
0,0.551700592041016
V
-1,0
BOT
0,47.2938333333333
V
0,0.555992126464844
V
-1,0
BOT
0,47.3005
V
0,0.559806823730469
V
-1,0
BOT
0,47.3071666666667
V
0,0.563144683837891
V
-1,0
BOT
0,47.3138333333333
V
0,0.565528869628906
V
-1,0
BOT
0,47.3205
V
0,0.566482543945313
V
-1,0
BOT
0,47.3271666666667
V
0,0.567913055419922
V
-1,0
BOT
0,47.3338333333333
V
0,0.569343566894531
V
-1,0
BOT
0,47.3405
V
0,0.568389892578125
V
-1,0
BOT
0,47.3471666666667
V
0,0.565528869628906
V
-1,0
BOT
0,47.3538333333333
V
0,0.560283660888672
V
-1,0
BOT
0,47.3605
V
0,0.553607940673828
V
-1,0
BOT
0,47.3671666666667
V
0,0.545024871826172
V
-1,0
BOT
0,47.3738333333333
V
0,0.535011291503906
V
-1,0
BOT
0,47.3805
V
0,0.524520874023438
V
-1,0
BOT
0,47.3871666666667
V
0,0.514507293701172
V
-1,0
BOT
0,47.3938333333333
V
0,0.5035400390625
V
-1,0
BOT
0,47.4005
V
0,0.493049621582031
V
-1,0
BOT
0,47.4071666666667
V
0,0.483036041259766
V
-1,0
BOT
0,47.4138333333333
V
0,0.4730224609375
V
-1,0
BOT
0,47.4205
V
0,0.463008880615234
V
-1,0
BOT
0,47.4271666666667
V
0,0.452995300292969
V
-1,0
BOT
0,47.4338333333333
V
0,0.445365905761719
V
-1,0
BOT
0,47.4405
V
0,0.439643859863281
V
-1,0
BOT
0,47.4471666666667
V
0,0.43487548828125
V
-1,0
BOT
0,47.4538333333333
V
0,0.432014465332031
V
-1,0
BOT
0,47.4605
V
0,0.432491302490234
V
-1,0
BOT
0,47.4671666666667
V
0,0.436305999755859
V
-1,0
BOT
0,47.4738333333333
V
0,0.442981719970703
V
-1,0
BOT
0,47.4805
V
0,0.452518463134766
V
-1,0
BOT
0,47.4871666666667
V
0,0.465869903564453
V
-1,0
BOT
0,47.4938333333333
V
0,0.483512878417969
V
-1,0
BOT
0,47.5005
V
0,0.503063201904297
V
-1,0
BOT
0,47.5071666666667
V
0,0.524520874023438
V
-1,0
BOT
0,47.5138333333333
V
0,0.546932220458984
V
-1,0
BOT
0,47.5205
V
0,0.568866729736328
V
-1,0
BOT
0,47.5271666666667
V
0,0.588417053222656
V
-1,0
BOT
0,47.5338333333333
V
0,0.604629516601563
V
-1,0
BOT
0,47.5405
V
0,0.616550445556641
V
-1,0
BOT
0,47.5471666666667
V
0,0.623226165771484
V
-1,0
BOT
0,47.5538333333333
V
0,0.623703002929688
V
-1,0
BOT
0,47.5605
V
0,0.618457794189453
V
-1,0
BOT
0,47.5671666666667
V
0,0.608921051025391
V
-1,0
BOT
0,47.5738333333333
V
0,0.595569610595703
V
-1,0
BOT
0,47.5805
V
0,0.580310821533203
V
-1,0
BOT
0,47.5871666666667
V
0,0.564098358154297
V
-1,0
BOT
0,47.5938333333333
V
0,0.548362731933594
V
-1,0
BOT
0,47.6005
V
0,0.533580780029297
V
-1,0
BOT
0,47.6071666666667
V
0,0.520706176757813
V
-1,0
BOT
0,47.6138333333333
V
0,0.507831573486328
V
-1,0
BOT
0,47.6205
V
0,0.494956970214844
V
-1,0
BOT
0,47.6271666666667
V
0,0.481605529785156
V
-1,0
BOT
0,47.6338333333333
V
0,0.469207763671875
V
-1,0
BOT
0,47.6405
V
0,0.457763671875
V
-1,0
BOT
0,47.6471666666667
V
0,0.447273254394531
V
-1,0
BOT
0,47.6538333333333
V
0,0.438690185546875
V
-1,0
BOT
0,47.6605
V
0,0.431537628173828
V
-1,0
BOT
0,47.6671666666667
V
0,0.425815582275391
V
-1,0
BOT
0,47.6738333333333
V
0,0.420093536376953
V
-1,0
BOT
0,47.6805
V
0,0.414848327636719
V
-1,0
BOT
0,47.6871666666667
V
0,0.410079956054688
V
-1,0
BOT
0,47.6938333333333
V
0,0.406742095947266
V
-1,0
BOT
0,47.7005
V
0,0.403881072998047
V
-1,0
BOT
0,47.7071666666667
V
0,0.402450561523438
V
-1,0
BOT
0,47.7138333333333
V
0,0.403404235839844
V
-1,0
BOT
0,47.7205
V
0,0.405311584472656
V
-1,0
BOT
0,47.7271666666667
V
0,0.408172607421875
V
-1,0
BOT
0,47.7338333333333
V
0,0.4119873046875
V
-1,0
BOT
0,47.7405
V
0,0.417232513427734
V
-1,0
BOT
0,47.7471666666667
V
0,0.423431396484375
V
-1,0
BOT
0,47.7538333333333
V
0,0.429153442382813
V
-1,0
BOT
0,47.7605
V
0,0.434398651123047
V
-1,0
BOT
0,47.7671666666667
V
0,0.438690185546875
V
-1,0
BOT
0,47.7738333333333
V
0,0.441551208496094
V
-1,0
BOT
0,47.7805
V
0,0.443935394287109
V
-1,0
BOT
0,47.7871666666667
V
0,0.445365905761719
V
-1,0
BOT
0,47.7938333333333
V
0,0.445842742919922
V
-1,0
BOT
0,47.8005
V
0,0.443935394287109
V
-1,0
BOT
0,47.8071666666667
V
0,0.441074371337891
V
-1,0
BOT
0,47.8138333333333
V
0,0.439167022705078
V
-1,0
BOT
0,47.8205
V
0,0.437259674072266
V
-1,0
BOT
0,47.8271666666667
V
0,0.436305999755859
V
-1,0
BOT
0,47.8338333333333
V
0,0.437736511230469
V
-1,0
BOT
0,47.8405
V
0,0.442981719970703
V
-1,0
BOT
0,47.8471666666667
V
0,0.452041625976563
V
-1,0
BOT
0,47.8538333333333
V
0,0.464439392089844
V
-1,0
BOT
0,47.8605
V
0,0.479698181152344
V
-1,0
BOT
0,47.8671666666667
V
0,0.496864318847656
V
-1,0
BOT
0,47.8738333333333
V
0,0.515460968017578
V
-1,0
BOT
0,47.8805
V
0,0.533103942871094
V
-1,0
BOT
0,47.8871666666667
V
0,0.54931640625
V
-1,0
BOT
0,47.8938333333333
V
0,0.562667846679688
V
-1,0
BOT
0,47.9005
V
0,0.57220458984375
V
-1,0
BOT
0,47.9071666666667
V
0,0.576019287109375
V
-1,0
BOT
0,47.9138333333333
V
0,0.575065612792969
V
-1,0
BOT
0,47.9205
V
0,0.570297241210938
V
-1,0
BOT
0,47.9271666666667
V
0,0.562667846679688
V
-1,0
BOT
0,47.9338333333333
V
0,0.552654266357422
V
-1,0
BOT
0,47.9405
V
0,0.540733337402344
V
-1,0
BOT
0,47.9471666666667
V
0,0.529766082763672
V
-1,0
BOT
0,47.9538333333333
V
0,0.519275665283203
V
-1,0
BOT
0,47.9605
V
0,0.510215759277344
V
-1,0
BOT
0,47.9671666666667
V
0,0.502586364746094
V
-1,0
BOT
0,47.9738333333333
V
0,0.494956970214844
V
-1,0
BOT
0,47.9805
V
0,0.487327575683594
V
-1,0
BOT
0,47.9871666666667
V
0,0.479221343994141
V
-1,0
BOT
0,47.9938333333333
V
0,0.470638275146484
V
-1,0
BOT
0,48.0005
V
0,0.461101531982422
V
-1,0
BOT
0,48.0071666666667
V
0,0.451564788818359
V
-1,0
BOT
0,48.0138333333333
V
0,0.4425048828125
V
-1,0
BOT
0,48.0205
V
0,0.435352325439453
V
-1,0
BOT
0,48.0271666666667
V
0,0.430583953857422
V
-1,0
BOT
0,48.0338333333333
V
0,0.429153442382813
V
-1,0
BOT
0,48.0405
V
0,0.431060791015625
V
-1,0
BOT
0,48.0471666666667
V
0,0.435829162597656
V
-1,0
BOT
0,48.0538333333333
V
0,0.441551208496094
V
-1,0
BOT
0,48.0605
V
0,0.448703765869141
V
-1,0
BOT
0,48.0671666666667
V
0,0.457763671875
V
-1,0
BOT
0,48.0738333333333
V
0,0.466346740722656
V
-1,0
BOT
0,48.0805
V
0,0.474929809570313
V
-1,0
BOT
0,48.0871666666667
V
0,0.485897064208984
V
-1,0
BOT
0,48.0938333333333
V
0,0.502586364746094
V
-1,0
BOT
0,48.1005
V
0,0.526905059814453
V
-1,0
BOT
0,48.1071666666667
V
0,0.561714172363281
V
-1,0
BOT
0,48.1138333333333
V
0,0.607490539550781
V
-1,0
BOT
0,48.1205
V
0,0.664710998535156
V
-1,0
BOT
0,48.1271666666667
V
0,0.732421875
V
-1,0
BOT
0,48.1338333333333
V
0,0.805854797363281
V
-1,0
BOT
0,48.1405
V
0,0.878810882568359
V
-1,0
BOT
0,48.1471666666667
V
0,0.945568084716797
V
-1,0
BOT
0,48.1538333333333
V
0,1.00231170654297
V
-1,0
BOT
0,48.1605
V
0,1.04331970214844
V
-1,0
BOT
0,48.1671666666667
V
0,1.06716156005859
V
-1,0
BOT
0,48.1738333333333
V
0,1.07240676879883
V
-1,0
BOT
0,48.1805
V
0,1.06096267700195
V
-1,0
BOT
0,48.1871666666667
V
0,1.03569030761719
V
-1,0
BOT
0,48.1938333333333
V
0,1.00135803222656
V
-1,0
BOT
0,48.2005
V
0,0.9613037109375
V
-1,0
BOT
0,48.2071666666667
V
0,0.918388366699219
V
-1,0
BOT
0,48.2138333333333
V
0,0.875949859619141
V
-1,0
BOT
0,48.2205
V
0,0.836372375488281
V
-1,0
BOT
0,48.2271666666667
V
0,0.803470611572266
V
-1,0
BOT
0,48.2338333333333
V
0,0.7781982421875
V
-1,0
BOT
0,48.2405
V
0,0.762462615966797
V
-1,0
BOT
0,48.2471666666667
V
0,0.759601593017578
V
-1,0
BOT
0,48.2538333333333
V
0,0.771045684814453
V
-1,0
BOT
0,48.2605
V
0,0.797271728515625
V
-1,0
BOT
0,48.2671666666667
V
0,0.835895538330078
V
-1,0
BOT
0,48.2738333333333
V
0,0.885009765625
V
-1,0
BOT
0,48.2805
V
0,0.941276550292969
V
-1,0
BOT
0,48.2871666666667
V
0,0.999927520751953
V
-1,0
BOT
0,48.2938333333333
V
0,1.05571746826172
V
-1,0
BOT
0,48.3005
V
0,1.10340118408203
V
-1,0
BOT
0,48.3071666666667
V
0,1.13821029663086
V
-1,0
BOT
0,48.3138333333333
V
0,1.15823745727539
V
-1,0
BOT
0,48.3205
V
0,1.16157531738281
V
-1,0
BOT
0,48.3271666666667
V
0,1.14822387695312
V
-1,0
BOT
0,48.3338333333333
V
0,1.12009048461914
V
-1,0
BOT
0,48.3405
V
0,1.08003616333008
V
-1,0
BOT
0,48.3471666666667
V
0,1.03235244750977
V
-1,0
BOT
0,48.3538333333333
V
0,0.979900360107422
V
-1,0
BOT
0,48.3605
V
0,0.925064086914063
V
-1,0
BOT
0,48.3671666666667
V
0,0.870227813720703
V
-1,0
BOT
0,48.3738333333333
V
0,0.817298889160156
V
-1,0
BOT
0,48.3805
V
0,0.768184661865234
V
-1,0
BOT
0,48.3871666666667
V
0,0.722885131835938
V
-1,0
BOT
0,48.3938333333333
V
0,0.681400299072266
V
-1,0
BOT
0,48.4005
V
0,0.646114349365234
V
-1,0
BOT
0,48.4071666666667
V
0,0.616550445556641
V
-1,0
BOT
0,48.4138333333333
V
0,0.593662261962891
V
-1,0
BOT
0,48.4205
V
0,0.575542449951172
V
-1,0
BOT
0,48.4271666666667
V
0,0.562191009521484
V
-1,0
BOT
0,48.4338333333333
V
0,0.553131103515625
V
-1,0
BOT
0,48.4405
V
0,0.547409057617188
V
-1,0
BOT
0,48.4471666666667
V
0,0.545024871826172
V
-1,0
BOT
0,48.4538333333333
V
0,0.546455383300781
V
-1,0
BOT
0,48.4605
V
0,0.551223754882813
V
-1,0
BOT
0,48.4671666666667
V
0,0.560283660888672
V
-1,0
BOT
0,48.4738333333333
V
0,0.571250915527344
V
-1,0
BOT
0,48.4805
V
0,0.584125518798828
V
-1,0
BOT
0,48.4871666666667
V
0,0.597953796386719
V
-1,0
BOT
0,48.4938333333333
V
0,0.612735748291016
V
-1,0
BOT
0,48.5005
V
0,0.626564025878906
V
-1,0
BOT
0,48.5071666666667
V
0,0.637531280517578
V
-1,0
BOT
0,48.5138333333333
V
0,0.644207000732422
V
-1,0
BOT
0,48.5205
V
0,0.648021697998047
V
-1,0
BOT
0,48.5271666666667
V
0,0.648975372314453
V
-1,0
BOT
0,48.5338333333333
V
0,0.645637512207031
V
-1,0
BOT
0,48.5405
V
0,0.639438629150391
V
-1,0
BOT
0,48.5471666666667
V
0,0.631332397460938
V
-1,0
BOT
0,48.5538333333333
V
0,0.623226165771484
V
-1,0
BOT
0,48.5605
V
0,0.616073608398438
V
-1,0
BOT
0,48.5671666666667
V
0,0.607967376708984
V
-1,0
BOT
0,48.5738333333333
V
0,0.599861145019531
V
-1,0
BOT
0,48.5805
V
0,0.590801239013672
V
-1,0
BOT
0,48.5871666666667
V
0,0.581741333007813
V
-1,0
BOT
0,48.5938333333333
V
0,0.57220458984375
V
-1,0
BOT
0,48.6005
V
0,0.562667846679688
V
-1,0
BOT
0,48.6071666666667
V
0,0.553131103515625
V
-1,0
BOT
0,48.6138333333333
V
0,0.544548034667969
V
-1,0
BOT
0,48.6205
V
0,0.537872314453125
V
-1,0
BOT
0,48.6271666666667
V
0,0.5340576171875
V
-1,0
BOT
0,48.6338333333333
V
0,0.532627105712891
V
-1,0
BOT
0,48.6405
V
0,0.532627105712891
V
-1,0
BOT
0,48.6471666666667
V
0,0.5340576171875
V
-1,0
BOT
0,48.6538333333333
V
0,0.537395477294922
V
-1,0
BOT
0,48.6605
V
0,0.54168701171875
V
-1,0
BOT
0,48.6671666666667
V
0,0.545978546142578
V
-1,0
BOT
0,48.6738333333333
V
0,0.550746917724609
V
-1,0
BOT
0,48.6805
V
0,0.556468963623047
V
-1,0
BOT
0,48.6871666666667
V
0,0.561237335205078
V
-1,0
BOT
0,48.6938333333333
V
0,0.566005706787109
V
-1,0
BOT
0,48.7005
V
0,0.570297241210938
V
-1,0
BOT
0,48.7071666666667
V
0,0.574111938476563
V
-1,0
BOT
0,48.7138333333333
V
0,0.577449798583984
V
-1,0
BOT
0,48.7205
V
0,0.581741333007813
V
-1,0
BOT
0,48.7271666666667
V
0,0.586509704589844
V
-1,0
BOT
0,48.7338333333333
V
0,0.591278076171875
V
-1,0
BOT
0,48.7405
V
0,0.596523284912109
V
-1,0
BOT
0,48.7471666666667
V
0,0.601768493652344
V
-1,0
BOT
0,48.7538333333333
V
0,0.607490539550781
V
-1,0
BOT
0,48.7605
V
0,0.613212585449219
V
-1,0
BOT
0,48.7671666666667
V
0,0.617027282714844
V
-1,0
BOT
0,48.7738333333333
V
0,0.619888305664063
V
-1,0
BOT
0,48.7805
V
0,0.619888305664063
V
-1,0
BOT
0,48.7871666666667
V
0,0.618457794189453
V
-1,0
BOT
0,48.7938333333333
V
0,0.616073608398438
V
-1,0
BOT
0,48.8005
V
0,0.612258911132813
V
-1,0
BOT
0,48.8071666666667
V
0,0.608444213867188
V
-1,0
BOT
0,48.8138333333333
V
0,0.603675842285156
V
-1,0
BOT
0,48.8205
V
0,0.598907470703125
V
-1,0
BOT
0,48.8271666666667
V
0,0.593185424804688
V
-1,0
BOT
0,48.8338333333333
V
0,0.586986541748047
V
-1,0
BOT
0,48.8405
V
0,0.579357147216797
V
-1,0
BOT
0,48.8471666666667
V
0,0.57220458984375
V
-1,0
BOT
0,48.8538333333333
V
0,0.567436218261719
V
-1,0
BOT
0,48.8605
V
0,0.565052032470703
V
-1,0
BOT
0,48.8671666666667
V
0,0.565528869628906
V
-1,0
BOT
0,48.8738333333333
V
0,0.568389892578125
V
-1,0
BOT
0,48.8805
V
0,0.571727752685547
V
-1,0
BOT
0,48.8871666666667
V
0,0.575542449951172
V
-1,0
BOT
0,48.8938333333333
V
0,0.579833984375
V
-1,0
BOT
0,48.9005
V
0,0.584125518798828
V
-1,0
BOT
0,48.9071666666667
V
0,0.588893890380859
V
-1,0
BOT
0,48.9138333333333
V
0,0.593662261962891
V
-1,0
BOT
0,48.9205
V
0,0.598907470703125
V
-1,0
BOT
0,48.9271666666667
V
0,0.605583190917969
V
-1,0
BOT
0,48.9338333333333
V
0,0.612735748291016
V
-1,0
BOT
0,48.9405
V
0,0.621795654296875
V
-1,0
BOT
0,48.9471666666667
V
0,0.630855560302734
V
-1,0
BOT
0,48.9538333333333
V
0,0.640392303466797
V
-1,0
BOT
0,48.9605
V
0,0.650405883789063
V
-1,0
BOT
0,48.9671666666667
V
0,0.659465789794922
V
-1,0
BOT
0,48.9738333333333
V
0,0.666618347167969
V
-1,0
BOT
0,48.9805
V
0,0.669479370117188
V
-1,0
BOT
0,48.9871666666667
V
0,0.669002532958984
V
-1,0
BOT
0,48.9938333333333
V
0,0.66375732421875
V
-1,0
BOT
0,49.0005
V
0,0.654697418212891
V
-1,0
BOT
0,49.0071666666667
V
0,0.641345977783203
V
-1,0
BOT
0,49.0138333333333
V
0,0.626087188720703
V
-1,0
BOT
0,49.0205
V
0,0.611305236816406
V
-1,0
BOT
0,49.0271666666667
V
0,0.597953796386719
V
-1,0
BOT
0,49.0338333333333
V
0,0.588893890380859
V
-1,0
BOT
0,49.0405
V
0,0.585556030273438
V
-1,0
BOT
0,49.0471666666667
V
0,0.589847564697266
V
-1,0
BOT
0,49.0538333333333
V
0,0.601768493652344
V
-1,0
BOT
0,49.0605
V
0,0.622272491455078
V
-1,0
BOT
0,49.0671666666667
V
0,0.649452209472656
V
-1,0
BOT
0,49.0738333333333
V
0,0.682830810546875
V
-1,0
BOT
0,49.0805
V
0,0.720977783203125
V
-1,0
BOT
0,49.0871666666667
V
0,0.760555267333984
V
-1,0
BOT
0,49.0938333333333
V
0,0.799655914306641
V
-1,0
BOT
0,49.1005
V
0,0.835895538330078
V
-1,0
BOT
0,49.1071666666667
V
0,0.865936279296875
V
-1,0
BOT
0,49.1138333333333
V
0,0.887870788574219
V
-1,0
BOT
0,49.1205
V
0,0.9002685546875
V
-1,0
BOT
0,49.1271666666667
V
0,0.903129577636719
V
-1,0
BOT
0,49.1338333333333
V
0,0.898361206054688
V
-1,0
BOT
0,49.1405
V
0,0.886440277099609
V
-1,0
BOT
0,49.1471666666667
V
0,0.869274139404297
V
-1,0
BOT
0,49.1538333333333
V
0,0.848770141601563
V
-1,0
BOT
0,49.1605
V
0,0.827789306640625
V
-1,0
BOT
0,49.1671666666667
V
0,0.807285308837891
V
-1,0
BOT
0,49.1738333333333
V
0,0.786304473876953
V
-1,0
BOT
0,49.1805
V
0,0.765323638916016
V
-1,0
BOT
0,49.1871666666667
V
0,0.745773315429688
V
-1,0
BOT
0,49.1938333333333
V
0,0.727176666259766
V
-1,0
BOT
0,49.2005
V
0,0.709056854248047
V
-1,0
BOT
0,49.2071666666667
V
0,0.690937042236328
V
-1,0
BOT
0,49.2138333333333
V
0,0.674247741699219
V
-1,0
BOT
0,49.2205
V
0,0.658035278320313
V
-1,0
BOT
0,49.2271666666667
V
0,0.642299652099609
V
-1,0
BOT
0,49.2338333333333
V
0,0.627517700195313
V
-1,0
BOT
0,49.2405
V
0,0.613689422607422
V
-1,0
BOT
0,49.2471666666667
V
0,0.601291656494141
V
-1,0
BOT
0,49.2538333333333
V
0,0.589370727539063
V
-1,0
BOT
0,49.2605
V
0,0.579833984375
V
-1,0
BOT
0,49.2671666666667
V
0,0.573158264160156
V
-1,0
BOT
0,49.2738333333333
V
0,0.567436218261719
V
-1,0
BOT
0,49.2805
V
0,0.563144683837891
V
-1,0
BOT
0,49.2871666666667
V
0,0.559806823730469
V
-1,0
BOT
0,49.2938333333333
V
0,0.558376312255859
V
-1,0
BOT
0,49.3005
V
0,0.557899475097656
V
-1,0
BOT
0,49.3071666666667
V
0,0.558376312255859
V
-1,0
BOT
0,49.3138333333333
V
0,0.558376312255859
V
-1,0
BOT
0,49.3205
V
0,0.558376312255859
V
-1,0
BOT
0,49.3271666666667
V
0,0.557422637939453
V
-1,0
BOT
0,49.3338333333333
V
0,0.555515289306641
V
-1,0
BOT
0,49.3405
V
0,0.554084777832031
V
-1,0
BOT
0,49.3471666666667
V
0,0.553131103515625
V
-1,0
BOT
0,49.3538333333333
V
0,0.553131103515625
V
-1,0
BOT
0,49.3605
V
0,0.554084777832031
V
-1,0
BOT
0,49.3671666666667
V
0,0.556468963623047
V
-1,0
BOT
0,49.3738333333333
V
0,0.561237335205078
V
-1,0
BOT
0,49.3805
V
0,0.568866729736328
V
-1,0
BOT
0,49.3871666666667
V
0,0.580310821533203
V
-1,0
BOT
0,49.3938333333333
V
0,0.596523284912109
V
-1,0
BOT
0,49.4005
V
0,0.619411468505859
V
-1,0
BOT
0,49.4071666666667
V
0,0.649452209472656
V
-1,0
BOT
0,49.4138333333333
V
0,0.684738159179688
V
-1,0
BOT
0,49.4205
V
0,0.724315643310547
V
-1,0
BOT
0,49.4271666666667
V
0,0.765800476074219
V
-1,0
BOT
0,49.4338333333333
V
0,0.807762145996094
V
-1,0
BOT
0,49.4405
V
0,0.847339630126953
V
-1,0
BOT
0,49.4471666666667
V
0,0.881195068359375
V
-1,0
BOT
0,49.4538333333333
V
0,0.907421112060547
V
-1,0
BOT
0,49.4605
V
0,0.923633575439453
V
-1,0
BOT
0,49.4671666666667
V
0,0.929355621337891
V
-1,0
BOT
0,49.4738333333333
V
0,0.925064086914063
V
-1,0
BOT
0,49.4805
V
0,0.912189483642578
V
-1,0
BOT
0,49.4871666666667
V
0,0.894069671630859
V
-1,0
BOT
0,49.4938333333333
V
0,0.872611999511719
V
-1,0
BOT
0,49.5005
V
0,0.850200653076172
V
-1,0
BOT
0,49.5071666666667
V
0,0.827789306640625
V
-1,0
BOT
0,49.5138333333333
V
0,0.806808471679688
V
-1,0
BOT
0,49.5205
V
0,0.787734985351563
V
-1,0
BOT
0,49.5271666666667
V
0,0.770092010498047
V
-1,0
BOT
0,49.5338333333333
V
0,0.754833221435547
V
-1,0
BOT
0,49.5405
V
0,0.741958618164063
V
-1,0
BOT
0,49.5471666666667
V
0,0.731945037841797
V
-1,0
BOT
0,49.5538333333333
V
0,0.725269317626953
V
-1,0
BOT
0,49.5605
V
0,0.720024108886719
V
-1,0
BOT
0,49.5671666666667
V
0,0.716209411621094
V
-1,0
BOT
0,49.5738333333333
V
0,0.713348388671875
V
-1,0
BOT
0,49.5805
V
0,0.710010528564453
V
-1,0
BOT
0,49.5871666666667
V
0,0.705718994140625
V
-1,0
BOT
0,49.5938333333333
V
0,0.701904296875
V
-1,0
BOT
0,49.6005
V
0,0.696659088134766
V
-1,0
BOT
0,49.6071666666667
V
0,0.690460205078125
V
-1,0
BOT
0,49.6138333333333
V
0,0.681877136230469
V
-1,0
BOT
0,49.6205
V
0,0.672817230224609
V
-1,0
BOT
0,49.6271666666667
V
0,0.663280487060547
V
-1,0
BOT
0,49.6338333333333
V
0,0.651836395263672
V
-1,0
BOT
0,49.6405
V
0,0.638961791992188
V
-1,0
BOT
0,49.6471666666667
V
0,0.626564025878906
V
-1,0
BOT
0,49.6538333333333
V
0,0.616550445556641
V
-1,0
BOT
0,49.6605
V
0,0.608444213867188
V
-1,0
BOT
0,49.6671666666667
V
0,0.600814819335938
V
-1,0
BOT
0,49.6738333333333
V
0,0.593662261962891
V
-1,0
BOT
0,49.6805
V
0,0.587940216064453
V
-1,0
BOT
0,49.6871666666667
V
0,0.584125518798828
V
-1,0
BOT
0,49.6938333333333
V
0,0.580310821533203
V
-1,0
BOT
0,49.7005
V
0,0.576972961425781
V
-1,0
BOT
0,49.7071666666667
V
0,0.575542449951172
V
-1,0
BOT
0,49.7138333333333
V
0,0.576972961425781
V
-1,0
BOT
0,49.7205
V
0,0.580310821533203
V
-1,0
BOT
0,49.7271666666667
V
0,0.585079193115234
V
-1,0
BOT
0,49.7338333333333
V
0,0.591754913330078
V
-1,0
BOT
0,49.7405
V
0,0.598907470703125
V
-1,0
BOT
0,49.7471666666667
V
0,0.606060028076172
V
-1,0
BOT
0,49.7538333333333
V
0,0.612735748291016
V
-1,0
BOT
0,49.7605
V
0,0.618457794189453
V
-1,0
BOT
0,49.7671666666667
V
0,0.624656677246094
V
-1,0
BOT
0,49.7738333333333
V
0,0.630855560302734
V
-1,0
BOT
0,49.7805
V
0,0.638961791992188
V
-1,0
BOT
0,49.7871666666667
V
0,0.649452209472656
V
-1,0
BOT
0,49.7938333333333
V
0,0.66375732421875
V
-1,0
BOT
0,49.8005
V
0,0.684261322021484
V
-1,0
BOT
0,49.8071666666667
V
0,0.712394714355469
V
-1,0
BOT
0,49.8138333333333
V
0,0.751018524169922
V
-1,0
BOT
0,49.8205
V
0,0.802516937255859
V
-1,0
BOT
0,49.8271666666667
V
0,0.869274139404297
V
-1,0
BOT
0,49.8338333333333
V
0,0.951290130615234
V
-1,0
BOT
0,49.8405
V
0,1.04665756225586
V
-1,0
BOT
0,49.8471666666667
V
0,1.15108489990234
V
-1,0
BOT
0,49.8538333333333
V
0,1.25741958618164
V
-1,0
BOT
0,49.8605
V
0,1.3575553894043
V
-1,0
BOT
0,49.8671666666667
V
0,1.44290924072266
V
-1,0
BOT
0,49.8738333333333
V
0,1.50680541992187
V
-1,0
BOT
0,49.8805
V
0,1.54495239257812
V
-1,0
BOT
0,49.8871666666667
V
0,1.556396484375
V
-1,0
BOT
0,49.8938333333333
V
0,1.54399871826172
V
-1,0
BOT
0,49.9005
V
0,1.5110969543457
V
-1,0
BOT
0,49.9071666666667
V
0,1.46150588989258
V
-1,0
BOT
0,49.9138333333333
V
0,1.40237808227539
V
-1,0
BOT
0,49.9205
V
0,1.33848190307617
V
-1,0
BOT
0,49.9271666666667
V
0,1.27410888671875
V
-1,0
BOT
0,49.9338333333333
V
0,1.21068954467773
V
-1,0
BOT
0,49.9405
V
0,1.15156173706055
V
-1,0
BOT
0,49.9471666666667
V
0,1.10006332397461
V
-1,0
BOT
0,49.9538333333333
V
0,1.05905532836914
V
-1,0
BOT
0,49.9605
V
0,1.03092193603516
V
-1,0
BOT
0,49.9671666666667
V
0,1.01804733276367
V
-1,0
BOT
0,49.9738333333333
V
0,1.02138519287109
V
-1,0
BOT
0,49.9805
V
0,1.04141235351562
V
-1,0
BOT
0,49.9871666666667
V
0,1.07383728027344
V
-1,0
BOT
0,49.9938333333333
V
0,1.11532211303711
V
-1,0
BOT
0,50.0005
V
0,1.15966796875
V
-1,0
BOT
0,50.0071666666667
V
0,1.20067596435547
V
-1,0
BOT
0,50.0138333333333
V
0,1.23500823974609
V
-1,0
BOT
0,50.0205
V
0,1.25932693481445
V
-1,0
BOT
0,50.0271666666667
V
0,1.27267837524414
V
-1,0
BOT
0,50.0338333333333
V
0,1.27458572387695
V
-1,0
BOT
0,50.0405
V
0,1.2664794921875
V
-1,0
BOT
0,50.0471666666667
V
0,1.2507438659668
V
-1,0
BOT
0,50.0538333333333
V
0,1.22880935668945
V
-1,0
BOT
0,50.0605
V
0,1.20115280151367
V
-1,0
BOT
0,50.0671666666667
V
0,1.16872787475586
V
-1,0
BOT
0,50.0738333333333
V
0,1.13296508789062
V
-1,0
BOT
0,50.0805
V
0,1.09624862670898
V
-1,0
BOT
0,50.0871666666667
V
0,1.05810165405273
V
-1,0
BOT
0,50.0938333333333
V
0,1.01900100708008
V
-1,0
BOT
0,50.1005
V
0,0.980854034423828
V
-1,0
BOT
0,50.1071666666667
V
0,0.944614410400391
V
-1,0
BOT
0,50.1138333333333
V
0,0.909805297851563
V
-1,0
BOT
0,50.1205
V
0,0.876426696777344
V
-1,0
BOT
0,50.1271666666667
V
0,0.845432281494141
V
-1,0
BOT
0,50.1338333333333
V
0,0.81634521484375
V
-1,0
BOT
0,50.1405
V
0,0.788688659667969
V
-1,0
BOT
0,50.1471666666667
V
0,0.762462615966797
V
-1,0
BOT
0,50.1538333333333
V
0,0.739097595214844
V
-1,0
BOT
0,50.1605
V
0,0.718593597412109
V
-1,0
BOT
0,50.1671666666667
V
0,0.700473785400391
V
-1,0
BOT
0,50.1738333333333
V
0,0.685691833496094
V
-1,0
BOT
0,50.1805
V
0,0.673770904541016
V
-1,0
BOT
0,50.1871666666667
V
0,0.664234161376953
V
-1,0
BOT
0,50.1938333333333
V
0,0.656604766845703
V
-1,0
BOT
0,50.2005
V
0,0.651836395263672
V
-1,0
BOT
0,50.2071666666667
V
0,0.648975372314453
V
-1,0
BOT
0,50.2138333333333
V
0,0.648021697998047
V
-1,0
BOT
0,50.2205
V
0,0.64849853515625
V
-1,0
BOT
0,50.2271666666667
V
0,0.650882720947266
V
-1,0
BOT
0,50.2338333333333
V
0,0.655651092529297
V
-1,0
BOT
0,50.2405
V
0,0.661849975585938
V
-1,0
BOT
0,50.2471666666667
V
0,0.668048858642578
V
-1,0
BOT
0,50.2538333333333
V
0,0.674724578857422
V
-1,0
BOT
0,50.2605
V
0,0.681877136230469
V
-1,0
BOT
0,50.2671666666667
V
0,0.688552856445313
V
-1,0
BOT
0,50.2738333333333
V
0,0.694751739501953
V
-1,0
BOT
0,50.2805
V
0,0.700950622558594
V
-1,0
BOT
0,50.2871666666667
V
0,0.706195831298828
V
-1,0
BOT
0,50.2938333333333
V
0,0.710964202880859
V
-1,0
BOT
0,50.3005
V
0,0.715255737304688
V
-1,0
BOT
0,50.3071666666667
V
0,0.720500946044922
V
-1,0
BOT
0,50.3138333333333
V
0,0.72479248046875
V
-1,0
BOT
0,50.3205
V
0,0.729560852050781
V
-1,0
BOT
0,50.3271666666667
V
0,0.735282897949219
V
-1,0
BOT
0,50.3338333333334
V
0,0.742912292480469
V
-1,0
BOT
0,50.3405
V
0,0.752925872802734
V
-1,0
BOT
0,50.3471666666667
V
0,0.763893127441406
V
-1,0
BOT
0,50.3538333333333
V
0,0.777244567871094
V
-1,0
BOT
0,50.3605
V
0,0.793933868408203
V
-1,0
BOT
0,50.3671666666667
V
0,0.813961029052734
V
-1,0
BOT
0,50.3738333333333
V
0,0.8392333984375
V
-1,0
BOT
0,50.3805
V
0,0.870227813720703
V
-1,0
BOT
0,50.3871666666667
V
0,0.906467437744141
V
-1,0
BOT
0,50.3938333333333
V
0,0.945568084716797
V
-1,0
BOT
0,50.4005
V
0,0.986099243164063
V
-1,0
BOT
0,50.4071666666667
V
0,1.02663040161133
V
-1,0
BOT
0,50.4138333333333
V
0,1.06525421142578
V
-1,0
BOT
0,50.4205
V
0,1.0986328125
V
-1,0
BOT
0,50.4271666666667
V
0,1.12485885620117
V
-1,0
BOT
0,50.4338333333333
V
0,1.14345550537109
V
-1,0
BOT
0,50.4405
V
0,1.15585327148437
V
-1,0
BOT
0,50.4471666666667
V
0,1.16157531738281
V
-1,0
BOT
0,50.4538333333333
V
0,1.16252899169922
V
-1,0
BOT
0,50.4605
V
0,1.16252899169922
V
-1,0
BOT
0,50.4671666666667
V
0,1.16682052612305
V
-1,0
BOT
0,50.4738333333333
V
0,1.17921829223633
V
-1,0
BOT
0,50.4805
V
0,1.20162963867187
V
-1,0
BOT
0,50.4871666666667
V
0,1.23500823974609
V
-1,0
BOT
0,50.4938333333333
V
0,1.27935409545898
V
-1,0
BOT
0,50.5005
V
0,1.33180618286133
V
-1,0
BOT
0,50.5071666666667
V
0,1.38616561889648
V
-1,0
BOT
0,50.5138333333333
V
0,1.43575668334961
V
-1,0
BOT
0,50.5205
V
0,1.47533416748047
V
-1,0
BOT
0,50.5271666666667
V
0,1.50156021118164
V
-1,0
BOT
0,50.5338333333333
V
0,1.51205062866211
V
-1,0
BOT
0,50.5405
V
0,1.50537490844727
V
-1,0
BOT
0,50.5471666666667
V
0,1.48200988769531
V
-1,0
BOT
0,50.5538333333333
V
0,1.44672393798828
V
-1,0
BOT
0,50.5605
V
0,1.40285491943359
V
-1,0
BOT
0,50.5671666666667
V
0,1.35231018066406
V
-1,0
BOT
0,50.5738333333333
V
0,1.2974739074707
V
-1,0
BOT
0,50.5805
V
0,1.24120712280273
V
-1,0
BOT
0,50.5871666666667
V
0,1.18780136108398
V
-1,0
BOT
0,50.5938333333333
V
0,1.13773345947266
V
-1,0
BOT
0,50.6005
V
0,1.09148025512695
V
-1,0
BOT
0,50.6071666666667
V
0,1.04999542236328
V
-1,0
BOT
0,50.6138333333333
V
0,1.01470947265625
V
-1,0
BOT
0,50.6205
V
0,0.985622406005859
V
-1,0
BOT
0,50.6271666666667
V
0,0.961780548095703
V
-1,0
BOT
0,50.6338333333333
V
0,0.942230224609375
V
-1,0
BOT
0,50.6405
V
0,0.926494598388672
V
-1,0
BOT
0,50.6471666666667
V
0,0.914096832275391
V
-1,0
BOT
0,50.6538333333334
V
0,0.904083251953125
V
-1,0
BOT
0,50.6605
V
0,0.895023345947266
V
-1,0
BOT
0,50.6671666666667
V
0,0.887393951416016
V
-1,0
BOT
0,50.6738333333333
V
0,0.879287719726563
V
-1,0
BOT
0,50.6805
V
0,0.870227813720703
V
-1,0
BOT
0,50.6871666666667
V
0,0.860691070556641
V
-1,0
BOT
0,50.6938333333333
V
0,0.849246978759766
V
-1,0
BOT
0,50.7005
V
0,0.836372375488281
V
-1,0
BOT
0,50.7071666666667
V
0,0.823497772216797
V
-1,0
BOT
0,50.7138333333334
V
0,0.811576843261719
V
-1,0
BOT
0,50.7205
V
0,0.800609588623047
V
-1,0
BOT
0,50.7271666666667
V
0,0.791072845458984
V
-1,0
BOT
0,50.7338333333334
V
0,0.781059265136719
V
-1,0
BOT
0,50.7405
V
0,0.771045684814453
V
-1,0
BOT
0,50.7471666666667
V
0,0.761032104492188
V
-1,0
BOT
0,50.7538333333334
V
0,0.751495361328125
V
-1,0
BOT
0,50.7605
V
0,0.743389129638672
V
-1,0
BOT
0,50.7671666666667
V
0,0.737190246582031
V
-1,0
BOT
0,50.7738333333333
V
0,0.731945037841797
V
-1,0
BOT
0,50.7805
V
0,0.727176666259766
V
-1,0
BOT
0,50.7871666666667
V
0,0.723361968994141
V
-1,0
BOT
0,50.7938333333333
V
0,0.720977783203125
V
-1,0
BOT
0,50.8005
V
0,0.718116760253906
V
-1,0
BOT
0,50.8071666666667
V
0,0.716209411621094
V
-1,0
BOT
0,50.8138333333333
V
0,0.715732574462891
V
-1,0
BOT
0,50.8205
V
0,0.718116760253906
V
-1,0
BOT
0,50.8271666666667
V
0,0.721931457519531
V
-1,0
BOT
0,50.8338333333333
V
0,0.725269317626953
V
-1,0
BOT
0,50.8405
V
0,0.728607177734375
V
-1,0
BOT
0,50.8471666666667
V
0,0.731468200683594
V
-1,0
BOT
0,50.8538333333333
V
0,0.734329223632813
V
-1,0
BOT
0,50.8605
V
0,0.736236572265625
V
-1,0
BOT
0,50.8671666666667
V
0,0.738143920898438
V
-1,0
BOT
0,50.8738333333333
V
0,0.739574432373047
V
-1,0
BOT
0,50.8805
V
0,0.741958618164063
V
-1,0
BOT
0,50.8871666666667
V
0,0.744342803955078
V
-1,0
BOT
0,50.8938333333333
V
0,0.747203826904297
V
-1,0
BOT
0,50.9005
V
0,0.750541687011719
V
-1,0
BOT
0,50.9071666666667
V
0,0.75531005859375
V
-1,0
BOT
0,50.9138333333333
V
0,0.762939453125
V
-1,0
BOT
0,50.9205
V
0,0.771522521972656
V
-1,0
BOT
0,50.9271666666667
V
0,0.781536102294922
V
-1,0
BOT
0,50.9338333333333
V
0,0.792026519775391
V
-1,0
BOT
0,50.9405
V
0,0.804424285888672
V
-1,0
BOT
0,50.9471666666667
V
0,0.818252563476563
V
-1,0
BOT
0,50.9538333333333
V
0,0.833511352539063
V
-1,0
BOT
0,50.9605
V
0,0.851154327392578
V
-1,0
BOT
0,50.9671666666667
V
0,0.871658325195313
V
-1,0
BOT
0,50.9738333333333
V
0,0.894546508789063
V
-1,0
BOT
0,50.9805
V
0,0.919342041015625
V
-1,0
BOT
0,50.9871666666667
V
0,0.944614410400391
V
-1,0
BOT
0,50.9938333333333
V
0,0.967025756835938
V
-1,0
BOT
0,51.0005
V
0,0.986576080322266
V
-1,0
BOT
0,51.0071666666667
V
0,1.00278854370117
V
-1,0
BOT
0,51.0138333333333
V
0,1.01423263549805
V
-1,0
BOT
0,51.0205
V
0,1.02090835571289
V
-1,0
BOT
0,51.0271666666667
V
0,1.02138519287109
V
-1,0
BOT
0,51.0338333333334
V
0,1.01804733276367
V
-1,0
BOT
0,51.0405
V
0,1.01280212402344
V
-1,0
BOT
0,51.0471666666667
V
0,1.00612640380859
V
-1,0
BOT
0,51.0538333333333
V
0,0.998497009277344
V
-1,0
BOT
0,51.0605
V
0,0.9918212890625
V
-1,0
BOT
0,51.0671666666667
V
0,0.988006591796875
V
-1,0
BOT
0,51.0738333333334
V
0,0.986099243164063
V
-1,0
BOT
0,51.0805
V
0,0.986576080322266
V
-1,0
BOT
0,51.0871666666667
V
0,0.988006591796875
V
-1,0
BOT
0,51.0938333333333
V
0,0.990390777587891
V
-1,0
BOT
0,51.1005
V
0,0.993251800537109
V
-1,0
BOT
0,51.1071666666667
V
0,0.993251800537109
V
-1,0
BOT
0,51.1138333333334
V
0,0.991344451904297
V
-1,0
BOT
0,51.1205
V
0,0.986099243164063
V
-1,0
BOT
0,51.1271666666667
V
0,0.977993011474609
V
-1,0
BOT
0,51.1338333333333
V
0,0.967979431152344
V
-1,0
BOT
0,51.1405
V
0,0.956535339355469
V
-1,0
BOT
0,51.1471666666667
V
0,0.944137573242188
V
-1,0
BOT
0,51.1538333333334
V
0,0.932693481445313
V
-1,0
BOT
0,51.1605
V
0,0.921726226806641
V
-1,0
BOT
0,51.1671666666667
V
0,0.912666320800781
V
-1,0
BOT
0,51.1738333333333
V
0,0.905036926269531
V
-1,0
BOT
0,51.1805
V
0,0.897884368896484
V
-1,0
BOT
0,51.1871666666667
V
0,0.89263916015625
V
-1,0
BOT
0,51.1938333333333
V
0,0.888347625732422
V
-1,0
BOT
0,51.2005
V
0,0.885486602783203
V
-1,0
BOT
0,51.2071666666667
V
0,0.884056091308594
V
-1,0
BOT
0,51.2138333333333
V
0,0.884056091308594
V
-1,0
BOT
0,51.2205
V
0,0.885009765625
V
-1,0
BOT
0,51.2271666666667
V
0,0.886917114257813
V
-1,0
BOT
0,51.2338333333333
V
0,0.890254974365234
V
-1,0
BOT
0,51.2405
V
0,0.894546508789063
V
-1,0
BOT
0,51.2471666666667
V
0,0.901222229003906
V
-1,0
BOT
0,51.2538333333333
V
0,0.910282135009766
V
-1,0
BOT
0,51.2605
V
0,0.922679901123047
V
-1,0
BOT
0,51.2671666666667
V
0,0.938892364501953
V
-1,0
BOT
0,51.2738333333333
V
0,0.957965850830078
V
-1,0
BOT
0,51.2805
V
0,0.979900360107422
V
-1,0
BOT
0,51.2871666666667
V
0,1.00374221801758
V
-1,0
BOT
0,51.2938333333333
V
0,1.02806091308594
V
-1,0
BOT
0,51.3005
V
0,1.05047225952148
V
-1,0
BOT
0,51.3071666666667
V
0,1.07145309448242
V
-1,0
BOT
0,51.3138333333333
V
0,1.08957290649414
V
-1,0
BOT
0,51.3205
V
0,1.10197067260742
V
-1,0
BOT
0,51.3271666666667
V
0,1.10864639282227
V
-1,0
BOT
0,51.3338333333333
V
0,1.10960006713867
V
-1,0
BOT
0,51.3405
V
0,1.10578536987305
V
-1,0
BOT
0,51.3471666666667
V
0,1.09720230102539
V
-1,0
BOT
0,51.3538333333333
V
0,1.08480453491211
V
-1,0
BOT
0,51.3605
V
0,1.07002258300781
V
-1,0
BOT
0,51.3671666666667
V
0,1.05524063110352
V
-1,0
BOT
0,51.3738333333333
V
0,1.04045867919922
V
-1,0
BOT
0,51.3805
V
0,1.02663040161133
V
-1,0
BOT
0,51.3871666666667
V
0,1.01470947265625
V
-1,0
BOT
0,51.3938333333333
V
0,1.00517272949219
V
-1,0
BOT
0,51.4005
V
0,0.997543334960938
V
-1,0
BOT
0,51.4071666666667
V
0,0.992774963378906
V
-1,0
BOT
0,51.4138333333333
V
0,0.991344451904297
V
-1,0
BOT
0,51.4205
V
0,0.992774963378906
V
-1,0
BOT
0,51.4271666666667
V
0,0.998497009277344
V
-1,0
BOT
0,51.4338333333333
V
0,1.00851058959961
V
-1,0
BOT
0,51.4405
V
0,1.02329254150391
V
-1,0
BOT
0,51.4471666666667
V
0,1.04284286499023
V
-1,0
BOT
0,51.4538333333333
V
0,1.068115234375
V
-1,0
BOT
0,51.4605
V
0,1.0986328125
V
-1,0
BOT
0,51.4671666666667
V
0,1.13153457641602
V
-1,0
BOT
0,51.4738333333333
V
0,1.16539001464844
V
-1,0
BOT
0,51.4805
V
0,1.19924545288086
V
-1,0
BOT
0,51.4871666666667
V
0,1.22928619384766
V
-1,0
BOT
0,51.4938333333333
V
0,1.25360488891602
V
-1,0
BOT
0,51.5005
V
0,1.26934051513672
V
-1,0
BOT
0,51.5071666666667
V
0,1.27601623535156
V
-1,0
BOT
0,51.5138333333333
V
0,1.27506256103516
V
-1,0
BOT
0,51.5205
V
0,1.2660026550293
V
-1,0
BOT
0,51.5271666666667
V
0,1.25026702880859
V
-1,0
BOT
0,51.5338333333334
V
0,1.23023986816406
V
-1,0
BOT
0,51.5405
V
0,1.20687484741211
V
-1,0
BOT
0,51.5471666666667
V
0,1.18255615234375
V
-1,0
BOT
0,51.5538333333334
V
0,1.1591911315918
V
-1,0
BOT
0,51.5605
V
0,1.13868713378906
V
-1,0
BOT
0,51.5671666666667
V
0,1.12199783325195
V
-1,0
BOT
0,51.5738333333333
V
0,1.10816955566406
V
-1,0
BOT
0,51.5805
V
0,1.09767913818359
V
-1,0
BOT
0,51.5871666666667
V
0,1.09148025512695
V
-1,0
BOT
0,51.5938333333333
V
0,1.08814239501953
V
-1,0
BOT
0,51.6005
V
0,1.08575820922852
V
-1,0
BOT
0,51.6071666666667
V
0,1.08528137207031
V
-1,0
BOT
0,51.6138333333333
V
0,1.08957290649414
V
-1,0
BOT
0,51.6205
V
0,1.0981559753418
V
-1,0
BOT
0,51.6271666666667
V
0,1.11198425292969
V
-1,0
BOT
0,51.6338333333333
V
0,1.13248825073242
V
-1,0
BOT
0,51.6405
V
0,1.1601448059082
V
-1,0
BOT
0,51.6471666666667
V
0,1.19543075561523
V
-1,0
BOT
0,51.6538333333333
V
0,1.2364387512207
V
-1,0
BOT
0,51.6605
V
0,1.28173828125
V
-1,0
BOT
0,51.6671666666667
V
0,1.33085250854492
V
-1,0
BOT
0,51.6738333333333
V
0,1.37948989868164
V
-1,0
BOT
0,51.6805
V
0,1.42335891723633
V
-1,0
BOT
0,51.6871666666667
V
0,1.45959854125977
V
-1,0
BOT
0,51.6938333333333
V
0,1.48582458496094
V
-1,0
BOT
0,51.7005
V
0,1.50060653686523
V
-1,0
BOT
0,51.7071666666667
V
0,1.50251388549805
V
-1,0
BOT
0,51.7138333333333
V
0,1.49250030517578
V
-1,0
BOT
0,51.7205
V
0,1.47247314453125
V
-1,0
BOT
0,51.7271666666667
V
0,1.44529342651367
V
-1,0
BOT
0,51.7338333333333
V
0,1.41286849975586
V
-1,0
BOT
0,51.7405
V
0,1.37853622436523
V
-1,0
BOT
0,51.7471666666667
V
0,1.34372711181641
V
-1,0
BOT
0,51.7538333333333
V
0,1.30987167358398
V
-1,0
BOT
0,51.7605
V
0,1.27696990966797
V
-1,0
BOT
0,51.7671666666667
V
0,1.24549865722656
V
-1,0
BOT
0,51.7738333333333
V
0,1.21593475341797
V
-1,0
BOT
0,51.7805
V
0,1.1897087097168
V
-1,0
BOT
0,51.7871666666667
V
0,1.16682052612305
V
-1,0
BOT
0,51.7938333333333
V
0,1.14679336547852
V
-1,0
BOT
0,51.8005
V
0,1.13105773925781
V
-1,0
BOT
0,51.8071666666667
V
0,1.11961364746094
V
-1,0
BOT
0,51.8138333333333
V
0,1.11246109008789
V
-1,0
BOT
0,51.8205
V
0,1.10673904418945
V
-1,0
BOT
0,51.8271666666667
V
0,1.10292434692383
V
-1,0
BOT
0,51.8338333333333
V
0,1.10197067260742
V
-1,0
BOT
0,51.8405
V
0,1.10340118408203
V
-1,0
BOT
0,51.8471666666667
V
0,1.10769271850586
V
-1,0
BOT
0,51.8538333333333
V
0,1.1134147644043
V
-1,0
BOT
0,51.8605
V
0,1.11961364746094
V
-1,0
BOT
0,51.8671666666667
V
0,1.12628936767578
V
-1,0
BOT
0,51.8738333333334
V
0,1.13296508789062
V
-1,0
BOT
0,51.8805
V
0,1.13868713378906
V
-1,0
BOT
0,51.8871666666667
V
0,1.14297866821289
V
-1,0
BOT
0,51.8938333333333
V
0,1.14583969116211
V
-1,0
BOT
0,51.9005
V
0,1.14822387695312
V
-1,0
BOT
0,51.9071666666667
V
0,1.14870071411133
V
-1,0
BOT
0,51.9138333333333
V
0,1.14727020263672
V
-1,0
BOT
0,51.9205
V
0,1.1439323425293
V
-1,0
BOT
0,51.9271666666667
V
0,1.13868713378906
V
-1,0
BOT
0,51.9338333333334
V
0,1.13105773925781
V
-1,0
BOT
0,51.9405
V
0,1.12342834472656
V
-1,0
BOT
0,51.9471666666667
V
0,1.11579895019531
V
-1,0
BOT
0,51.9538333333334
V
0,1.10769271850586
V
-1,0
BOT
0,51.9605
V
0,1.0981559753418
V
-1,0
BOT
0,51.9671666666667
V
0,1.08861923217773
V
-1,0
BOT
0,51.9738333333333
V
0,1.08098983764648
V
-1,0
BOT
0,51.9805
V
0,1.07336044311523
V
-1,0
BOT
0,51.9871666666667
V
0,1.06620788574219
V
-1,0
BOT
0,51.9938333333333
V
0,1.06048583984375
V
-1,0
BOT
0,52.0005
V
0,1.05667114257812
V
-1,0
BOT
0,52.0071666666667
V
0,1.05428695678711
V
-1,0
BOT
0,52.0138333333333
V
0,1.05190277099609
V
-1,0
BOT
0,52.0205
V
0,1.04999542236328
V
-1,0
BOT
0,52.0271666666667
V
0,1.04904174804687
V
-1,0
BOT
0,52.0338333333333
V
0,1.04904174804687
V
-1,0
BOT
0,52.0405
V
0,1.04904174804687
V
-1,0
BOT
0,52.0471666666667
V
0,1.05047225952148
V
-1,0
BOT
0,52.0538333333333
V
0,1.0528564453125
V
-1,0
BOT
0,52.0605
V
0,1.05571746826172
V
-1,0
BOT
0,52.0671666666667
V
0,1.05857849121094
V
-1,0
BOT
0,52.0738333333333
V
0,1.06143951416016
V
-1,0
BOT
0,52.0805
V
0,1.06668472290039
V
-1,0
BOT
0,52.0871666666667
V
0,1.07574462890625
V
-1,0
BOT
0,52.0938333333333
V
0,1.08861923217773
V
-1,0
BOT
0,52.1005
V
0,1.10578536987305
V
-1,0
BOT
0,52.1071666666667
V
0,1.1296272277832
V
-1,0
BOT
0,52.1138333333333
V
0,1.15966796875
V
-1,0
BOT
0,52.1205
V
0,1.19447708129883
V
-1,0
BOT
0,52.1271666666667
V
0,1.23071670532227
V
-1,0
BOT
0,52.1338333333333
V
0,1.2669563293457
V
-1,0
BOT
0,52.1405
V
0,1.29985809326172
V
-1,0
BOT
0,52.1471666666667
V
0,1.3270378112793
V
-1,0
BOT
0,52.1538333333333
V
0,1.34658813476562
V
-1,0
BOT
0,52.1605
V
0,1.35707855224609
V
-1,0
BOT
0,52.1671666666667
V
0,1.36089324951172
V
-1,0
BOT
0,52.1738333333333
V
0,1.35946273803711
V
-1,0
BOT
0,52.1805
V
0,1.35421752929687
V
-1,0
BOT
0,52.1871666666667
V
0,1.34611129760742
V
-1,0
BOT
0,52.1938333333333
V
0,1.33752822875977
V
-1,0
BOT
0,52.2005
V
0,1.32894515991211
V
-1,0
BOT
0,52.2071666666667
V
0,1.32131576538086
V
-1,0
BOT
0,52.2138333333333
V
0,1.31416320800781
V
-1,0
BOT
0,52.2205
V
0,1.30844116210937
V
-1,0
BOT
0,52.2271666666667
V
0,1.30653381347656
V
-1,0
BOT
0,52.2338333333333
V
0,1.30844116210937
V
-1,0
BOT
0,52.2405
V
0,1.31511688232422
V
-1,0
BOT
0,52.2471666666667
V
0,1.32513046264648
V
-1,0
BOT
0,52.2538333333334
V
0,1.33848190307617
V
-1,0
BOT
0,52.2605
V
0,1.35421752929687
V
-1,0
BOT
0,52.2671666666667
V
0,1.36995315551758
V
-1,0
BOT
0,52.2738333333333
V
0,1.38378143310547
V
-1,0
BOT
0,52.2805
V
0,1.39570236206055
V
-1,0
BOT
0,52.2871666666667
V
0,1.40476226806641
V
-1,0
BOT
0,52.2938333333333
V
0,1.41000747680664
V
-1,0
BOT
0,52.3005
V
0,1.41096115112305
V
-1,0
BOT
0,52.3071666666667
V
0,1.40905380249023
V
-1,0
BOT
0,52.3138333333333
V
0,1.4033317565918
V
-1,0
BOT
0,52.3205
V
0,1.39427185058594
V
-1,0
BOT
0,52.3271666666667
V
0,1.38235092163086
V
-1,0
BOT
0,52.3338333333334
V
0,1.36852264404297
V
-1,0
BOT
0,52.3405
V
0,1.35374069213867
V
-1,0
BOT
0,52.3471666666667
V
0,1.33848190307617
V
-1,0
BOT
0,52.3538333333334
V
0,1.32274627685547
V
-1,0
BOT
0,52.3605
V
0,1.30939483642578
V
-1,0
BOT
0,52.3671666666667
V
0,1.29985809326172
V
-1,0
BOT
0,52.3738333333333
V
0,1.29318237304687
V
-1,0
BOT
0,52.3805
V
0,1.28984451293945
V
-1,0
BOT
0,52.3871666666667
V
0,1.28936767578125
V
-1,0
BOT
0,52.3938333333333
V
0,1.28984451293945
V
-1,0
BOT
0,52.4005
V
0,1.29032135009766
V
-1,0
BOT
0,52.4071666666667
V
0,1.28793716430664
V
-1,0
BOT
0,52.4138333333333
V
0,1.28412246704102
V
-1,0
BOT
0,52.4205
V
0,1.27887725830078
V
-1,0
BOT
0,52.4271666666667
V
0,1.27220153808594
V
-1,0
BOT
0,52.4338333333333
V
0,1.26504898071289
V
-1,0
BOT
0,52.4405
V
0,1.25837326049805
V
-1,0
BOT
0,52.4471666666667
V
0,1.25217437744141
V
-1,0
BOT
0,52.4538333333333
V
0,1.24597549438477
V
-1,0
BOT
0,52.4605
V
0,1.24025344848633
V
-1,0
BOT
0,52.4671666666667
V
0,1.2364387512207
V
-1,0
BOT
0,52.4738333333333
V
0,1.23262405395508
V
-1,0
BOT
0,52.4805
V
0,1.22833251953125
V
-1,0
BOT
0,52.4871666666667
V
0,1.22451782226562
V
-1,0
BOT
0,52.4938333333333
V
0,1.220703125
V
-1,0
BOT
0,52.5005
V
0,1.21784210205078
V
-1,0
BOT
0,52.5071666666667
V
0,1.21593475341797
V
-1,0
BOT
0,52.5138333333333
V
0,1.21545791625977
V
-1,0
BOT
0,52.5205
V
0,1.21593475341797
V
-1,0
BOT
0,52.5271666666667
V
0,1.21688842773437
V
-1,0
BOT
0,52.5338333333333
V
0,1.21736526489258
V
-1,0
BOT
0,52.5405
V
0,1.21736526489258
V
-1,0
BOT
0,52.5471666666667
V
0,1.21498107910156
V
-1,0
BOT
0,52.5538333333333
V
0,1.21259689331055
V
-1,0
BOT
0,52.5605
V
0,1.21068954467773
V
-1,0
BOT
0,52.5671666666667
V
0,1.20973587036133
V
-1,0
BOT
0,52.5738333333333
V
0,1.20878219604492
V
-1,0
BOT
0,52.5805
V
0,1.20878219604492
V
-1,0
BOT
0,52.5871666666667
V
0,1.21021270751953
V
-1,0
BOT
0,52.5938333333333
V
0,1.21212005615234
V
-1,0
BOT
0,52.6005
V
0,1.21450424194336
V
-1,0
BOT
0,52.6071666666667
V
0,1.21688842773437
V
-1,0
BOT
0,52.6138333333333
V
0,1.21974945068359
V
-1,0
BOT
0,52.6205
V
0,1.22356414794922
V
-1,0
BOT
0,52.6271666666667
V
0,1.22690200805664
V
-1,0
BOT
0,52.6338333333333
V
0,1.23071670532227
V
-1,0
BOT
0,52.6405
V
0,1.2354850769043
V
-1,0
BOT
0,52.6471666666667
V
0,1.24168395996094
V
-1,0
BOT
0,52.6538333333333
V
0,1.24931335449219
V
-1,0
BOT
0,52.6605
V
0,1.25789642333984
V
-1,0
BOT
0,52.6671666666667
V
0,1.2664794921875
V
-1,0
BOT
0,52.6738333333334
V
0,1.27553939819336
V
-1,0
BOT
0,52.6805
V
0,1.28412246704102
V
-1,0
BOT
0,52.6871666666667
V
0,1.29222869873047
V
-1,0
BOT
0,52.6938333333333
V
0,1.29890441894531
V
-1,0
BOT
0,52.7005
V
0,1.30558013916016
V
-1,0
BOT
0,52.7071666666667
V
0,1.31130218505859
V
-1,0
BOT
0,52.7138333333334
V
0,1.31464004516602
V
-1,0
BOT
0,52.7205
V
0,1.31654739379883
V
-1,0
BOT
0,52.7271666666667
V
0,1.31702423095703
V
-1,0
BOT
0,52.7338333333333
V
0,1.31607055664062
V
-1,0
BOT
0,52.7405
V
0,1.31416320800781
V
-1,0
BOT
0,52.7471666666667
V
0,1.31082534790039
V
-1,0
BOT
0,52.7538333333334
V
0,1.30796432495117
V
-1,0
BOT
0,52.7605
V
0,1.30558013916016
V
-1,0
BOT
0,52.7671666666667
V
0,1.30462646484375
V
-1,0
BOT
0,52.7738333333333
V
0,1.30558013916016
V
-1,0
BOT
0,52.7805
V
0,1.30939483642578
V
-1,0
BOT
0,52.7871666666667
V
0,1.31607055664062
V
-1,0
BOT
0,52.7938333333333
V
0,1.32513046264648
V
-1,0
BOT
0,52.8005
V
0,1.33657455444336
V
-1,0
BOT
0,52.8071666666667
V
0,1.34944915771484
V
-1,0
BOT
0,52.8138333333333
V
0,1.36375427246094
V
-1,0
BOT
0,52.8205
V
0,1.37758255004883
V
-1,0
BOT
0,52.8271666666667
V
0,1.39045715332031
V
-1,0
BOT
0,52.8338333333333
V
0,1.4033317565918
V
-1,0
BOT
0,52.8405
V
0,1.41477584838867
V
-1,0
BOT
0,52.8471666666667
V
0,1.42431259155273
V
-1,0
BOT
0,52.8538333333333
V
0,1.43098831176758
V
-1,0
BOT
0,52.8605
V
0,1.4348030090332
V
-1,0
BOT
0,52.8671666666667
V
0,1.43766403198242
V
-1,0
BOT
0,52.8738333333333
V
0,1.43814086914062
V
-1,0
BOT
0,52.8805
V
0,1.43671035766602
V
-1,0
BOT
0,52.8871666666667
V
0,1.4348030090332
V
-1,0
BOT
0,52.8938333333333
V
0,1.43241882324219
V
-1,0
BOT
0,52.9005
V
0,1.42955780029297
V
-1,0
BOT
0,52.9071666666667
V
0,1.42574310302734
V
-1,0
BOT
0,52.9138333333333
V
0,1.42049789428711
V
-1,0
BOT
0,52.9205
V
0,1.41572952270508
V
-1,0
BOT
0,52.9271666666667
V
0,1.41000747680664
V
-1,0
BOT
0,52.9338333333333
V
0,1.40476226806641
V
-1,0
BOT
0,52.9405
V
0,1.39951705932617
V
-1,0
BOT
0,52.9471666666667
V
0,1.39379501342773
V
-1,0
BOT
0,52.9538333333333
V
0,1.3885498046875
V
-1,0
BOT
0,52.9605
V
0,1.38330459594727
V
-1,0
BOT
0,52.9671666666667
V
0,1.37805938720703
V
-1,0
BOT
0,52.9738333333333
V
0,1.3728141784668
V
-1,0
BOT
0,52.9805
V
0,1.36852264404297
V
-1,0
BOT
0,52.9871666666667
V
0,1.36661529541016
V
-1,0
BOT
0,52.9938333333333
V
0,1.36661529541016
V
-1,0
BOT
0,53.0005
V
0,1.36756896972656
V
-1,0
BOT
0,53.0071666666667
V
0,1.36852264404297
V
-1,0
BOT
0,53.0138333333333
V
0,1.37042999267578
V
-1,0
BOT
0,53.0205
V
0,1.373291015625
V
-1,0
BOT
0,53.0271666666667
V
0,1.37567520141602
V
-1,0
BOT
0,53.0338333333333
V
0,1.37662887573242
V
-1,0
BOT
0,53.0405
V
0,1.37805938720703
V
-1,0
BOT
0,53.0471666666667
V
0,1.37948989868164
V
-1,0
BOT
0,53.0538333333333
V
0,1.38139724731445
V
-1,0
BOT
0,53.0605
V
0,1.38378143310547
V
-1,0
BOT
0,53.0671666666667
V
0,1.38664245605469
V
-1,0
BOT
0,53.0738333333333
V
0,1.39093399047852
V
-1,0
BOT
0,53.0805
V
0,1.39522552490234
V
-1,0
BOT
0,53.0871666666667
V
0,1.39999389648437
V
-1,0
BOT
0,53.0938333333334
V
0,1.40476226806641
V
-1,0
BOT
0,53.1005
V
0,1.40953063964844
V
-1,0
BOT
0,53.1071666666667
V
0,1.41429901123047
V
-1,0
BOT
0,53.1138333333333
V
0,1.42002105712891
V
-1,0
BOT
0,53.1205
V
0,1.42621994018555
V
-1,0
BOT
0,53.1271666666667
V
0,1.43337249755859
V
-1,0
BOT
0,53.1338333333333
V
0,1.44004821777344
V
-1,0
BOT
0,53.1405
V
0,1.44624710083008
V
-1,0
BOT
0,53.1471666666667
V
0,1.45053863525391
V
-1,0
BOT
0,53.1538333333334
V
0,1.45339965820312
V
-1,0
BOT
0,53.1605
V
0,1.45626068115234
V
-1,0
BOT
0,53.1671666666667
V
0,1.45912170410156
V
-1,0
BOT
0,53.1738333333334
V
0,1.46198272705078
V
-1,0
BOT
0,53.1805
V
0,1.46579742431641
V
-1,0
BOT
0,53.1871666666667
V
0,1.46913528442383
V
-1,0
BOT
0,53.1938333333333
V
0,1.47247314453125
V
-1,0
BOT
0,53.2005
V
0,1.47438049316406
V
-1,0
BOT
0,53.2071666666667
V
0,1.47581100463867
V
-1,0
BOT
0,53.2138333333333
V
0,1.47676467895508
V
-1,0
BOT
0,53.2205
V
0,1.47724151611328
V
-1,0
BOT
0,53.2271666666667
V
0,1.47819519042969
V
-1,0
BOT
0,53.2338333333333
V
0,1.4805793762207
V
-1,0
BOT
0,53.2405
V
0,1.48296356201172
V
-1,0
BOT
0,53.2471666666667
V
0,1.48487091064453
V
-1,0
BOT
0,53.2538333333333
V
0,1.48582458496094
V
-1,0
BOT
0,53.2605
V
0,1.48630142211914
V
-1,0
BOT
0,53.2671666666667
V
0,1.48725509643555
V
-1,0
BOT
0,53.2738333333333
V
0,1.48820877075195
V
-1,0
BOT
0,53.2805
V
0,1.48963928222656
V
-1,0
BOT
0,53.2871666666667
V
0,1.49297714233398
V
-1,0
BOT
0,53.2938333333333
V
0,1.49774551391602
V
-1,0
BOT
0,53.3005
V
0,1.50346755981445
V
-1,0
BOT
0,53.3071666666667
V
0,1.50775909423828
V
-1,0
BOT
0,53.3138333333333
V
0,1.5110969543457
V
-1,0
BOT
0,53.3205
V
0,1.51348114013672
V
-1,0
BOT
0,53.3271666666667
V
0,1.51538848876953
V
-1,0
BOT
0,53.3338333333333
V
0,1.51634216308594
V
-1,0
BOT
0,53.3405
V
0,1.51729583740234
V
-1,0
BOT
0,53.3471666666667
V
0,1.51920318603516
V
-1,0
BOT
0,53.3538333333333
V
0,1.52063369750977
V
-1,0
BOT
0,53.3605
V
0,1.52158737182617
V
-1,0
BOT
0,53.3671666666667
V
0,1.52206420898437
V
-1,0
BOT
0,53.3738333333333
V
0,1.52015686035156
V
-1,0
BOT
0,53.3805
V
0,1.51729583740234
V
-1,0
BOT
0,53.3871666666667
V
0,1.51300430297852
V
-1,0
BOT
0,53.3938333333333
V
0,1.50775909423828
V
-1,0
BOT
0,53.4005
V
0,1.50203704833984
V
-1,0
BOT
0,53.4071666666667
V
0,1.4958381652832
V
-1,0
BOT
0,53.4138333333333
V
0,1.49106979370117
V
-1,0
BOT
0,53.4205
V
0,1.48725509643555
V
-1,0
BOT
0,53.4271666666667
V
0,1.48439407348633
V
-1,0
BOT
0,53.4338333333333
V
0,1.48153305053711
V
-1,0
BOT
0,53.4405
V
0,1.4801025390625
V
-1,0
BOT
0,53.4471666666667
V
0,1.47914886474609
V
-1,0
BOT
0,53.4538333333333
V
0,1.47771835327148
V
-1,0
BOT
0,53.4605
V
0,1.47676467895508
V
-1,0
BOT
0,53.4671666666667
V
0,1.47581100463867
V
-1,0
BOT
0,53.4738333333334
V
0,1.47628784179687
V
-1,0
BOT
0,53.4805
V
0,1.47819519042969
V
-1,0
BOT
0,53.4871666666667
V
0,1.4805793762207
V
-1,0
BOT
0,53.4938333333333
V
0,1.48248672485352
V
-1,0
BOT
0,53.5005
V
0,1.48534774780273
V
-1,0
BOT
0,53.5071666666667
V
0,1.48868560791016
V
-1,0
BOT
0,53.5138333333333
V
0,1.49345397949219
V
-1,0
BOT
0,53.5205
V
0,1.49965286254883
V
-1,0
BOT
0,53.5271666666667
V
0,1.50823593139648
V
-1,0
BOT
0,53.5338333333334
V
0,1.52111053466797
V
-1,0
BOT
0,53.5405
V
0,1.53970718383789
V
-1,0
BOT
0,53.5471666666667
V
0,1.56402587890625
V
-1,0
BOT
0,53.5538333333334
V
0,1.59311294555664
V
-1,0
BOT
0,53.5605
V
0,1.62506103515625
V
-1,0
BOT
0,53.5671666666667
V
0,1.66082382202148
V
-1,0
BOT
0,53.5738333333334
V
0,1.69897079467773
V
-1,0
BOT
0,53.5805
V
0,1.73759460449219
V
-1,0
BOT
0,53.5871666666667
V
0,1.77383422851562
V
-1,0
BOT
0,53.5938333333333
V
0,1.80578231811523
V
-1,0
BOT
0,53.6005
V
0,1.83248519897461
V
-1,0
BOT
0,53.6071666666667
V
0,1.85251235961914
V
-1,0
BOT
0,53.6138333333333
V
0,1.86347961425781
V
-1,0
BOT
0,53.6205
V
0,1.86538696289062
V
-1,0
BOT
0,53.6271666666667
V
0,1.85823440551758
V
-1,0
BOT
0,53.6338333333333
V
0,1.84392929077148
V
-1,0
BOT
0,53.6405
V
0,1.82294845581055
V
-1,0
BOT
0,53.6471666666667
V
0,1.79672241210937
V
-1,0
BOT
0,53.6538333333333
V
0,1.76715850830078
V
-1,0
BOT
0,53.6605
V
0,1.73521041870117
V
-1,0
BOT
0,53.6671666666667
V
0,1.70230865478516
V
-1,0
BOT
0,53.6738333333333
V
0,1.66988372802734
V
-1,0
BOT
0,53.6805
V
0,1.63888931274414
V
-1,0
BOT
0,53.6871666666667
V
0,1.60932540893555
V
-1,0
BOT
0,53.6938333333333
V
0,1.58262252807617
V
-1,0
BOT
0,53.7005
V
0,1.55925750732422
V
-1,0
BOT
0,53.7071666666667
V
0,1.53875350952148
V
-1,0
BOT
0,53.7138333333333
V
0,1.52015686035156
V
-1,0
BOT
0,53.7205
V
0,1.50394439697266
V
-1,0
BOT
0,53.7271666666667
V
0,1.49202346801758
V
-1,0
BOT
0,53.7338333333333
V
0,1.48200988769531
V
-1,0
BOT
0,53.7405
V
0,1.47342681884766
V
-1,0
BOT
0,53.7471666666667
V
0,1.46722793579102
V
-1,0
BOT
0,53.7538333333333
V
0,1.46245956420898
V
-1,0
BOT
0,53.7605
V
0,1.45864486694336
V
-1,0
BOT
0,53.7671666666667
V
0,1.45244598388672
V
-1,0
BOT
0,53.7738333333333
V
0,1.44577026367187
V
-1,0
BOT
0,53.7805
V
0,1.44004821777344
V
-1,0
BOT
0,53.7871666666667
V
0,1.434326171875
V
-1,0
BOT
0,53.7938333333333
V
0,1.42955780029297
V
-1,0
BOT
0,53.8005
V
0,1.42431259155273
V
-1,0
BOT
0,53.8071666666667
V
0,1.42097473144531
V
-1,0
BOT
0,53.8138333333333
V
0,1.4185905456543
V
-1,0
BOT
0,53.8205
V
0,1.41620635986328
V
-1,0
BOT
0,53.8271666666667
V
0,1.41382217407227
V
-1,0
BOT
0,53.8338333333333
V
0,1.41239166259766
V
-1,0
BOT
0,53.8405
V
0,1.41048431396484
V
-1,0
BOT
0,53.8471666666667
V
0,1.40857696533203
V
-1,0
BOT
0,53.8538333333334
V
0,1.40714645385742
V
-1,0
BOT
0,53.8605
V
0,1.40523910522461
V
-1,0
BOT
0,53.8671666666667
V
0,1.4033317565918
V
-1,0
BOT
0,53.8738333333333
V
0,1.40094757080078
V
-1,0
BOT
0,53.8805
V
0,1.39856338500977
V
-1,0
BOT
0,53.8871666666667
V
0,1.39522552490234
V
-1,0
BOT
0,53.8938333333334
V
0,1.39188766479492
V
-1,0
BOT
0,53.9005
V
0,1.3880729675293
V
-1,0
BOT
0,53.9071666666667
V
0,1.38425827026367
V
-1,0
BOT
0,53.9138333333333
V
0,1.38092041015625
V
-1,0
BOT
0,53.9205
V
0,1.37853622436523
V
-1,0
BOT
0,53.9271666666667
V
0,1.37805938720703
V
-1,0
BOT
0,53.9338333333334
V
0,1.37710571289062
V
-1,0
BOT
0,53.9405
V
0,1.37567520141602
V
-1,0
BOT
0,53.9471666666667
V
0,1.37472152709961
V
-1,0
BOT
0,53.9538333333333
V
0,1.373291015625
V
-1,0
BOT
0,53.9605
V
0,1.3728141784668
V
-1,0
BOT
0,53.9671666666667
V
0,1.37186050415039
V
-1,0
BOT
0,53.9738333333334
V
0,1.37186050415039
V
-1,0
BOT
0,53.9805
V
0,1.37186050415039
V
-1,0
BOT
0,53.9871666666667
V
0,1.37186050415039
V
-1,0
BOT
0,53.9938333333333
V
0,1.3728141784668
V
-1,0
BOT
0,54.0005
V
0,1.3737678527832
V
-1,0
BOT
0,54.0071666666667
V
0,1.37519836425781
V
-1,0
BOT
0,54.0138333333333
V
0,1.37710571289062
V
-1,0
BOT
0,54.0205
V
0,1.37996673583984
V
-1,0
BOT
0,54.0271666666667
V
0,1.38235092163086
V
-1,0
BOT
0,54.0338333333333
V
0,1.38473510742187
V
-1,0
BOT
0,54.0405
V
0,1.38664245605469
V
-1,0
BOT
0,54.0471666666667
V
0,1.3890266418457
V
-1,0
BOT
0,54.0538333333333
V
0,1.39093399047852
V
-1,0
BOT
0,54.0605
V
0,1.39236450195312
V
-1,0
BOT
0,54.0671666666667
V
0,1.39474868774414
V
-1,0
BOT
0,54.0738333333333
V
0,1.39713287353516
V
-1,0
BOT
0,54.0805
V
0,1.39808654785156
V
-1,0
BOT
0,54.0871666666667
V
0,1.39904022216797
V
-1,0
BOT
0,54.0938333333333
V
0,1.40094757080078
V
-1,0
BOT
0,54.1005
V
0,1.40237808227539
V
-1,0
BOT
0,54.1071666666667
V
0,1.40285491943359
V
-1,0
BOT
0,54.1138333333333
V
0,1.40285491943359
V
-1,0
BOT
0,54.1205
V
0,1.40285491943359
V
-1,0
BOT
0,54.1271666666667
V
0,1.40237808227539
V
-1,0
BOT
0,54.1338333333333
V
0,1.40047073364258
V
-1,0
BOT
0,54.1405
V
0,1.39760971069336
V
-1,0
BOT
0,54.1471666666667
V
0,1.39379501342773
V
-1,0
BOT
0,54.1538333333333
V
0,1.3890266418457
V
-1,0
BOT
0,54.1605
V
0,1.38473510742187
V
-1,0
BOT
0,54.1671666666667
V
0,1.38092041015625
V
-1,0
BOT
0,54.1738333333333
V
0,1.37758255004883
V
-1,0
BOT
0,54.1805
V
0,1.37424468994141
V
-1,0
BOT
0,54.1871666666667
V
0,1.37186050415039
V
-1,0
BOT
0,54.1938333333333
V
0,1.36947631835937
V
-1,0
BOT
0,54.2005
V
0,1.36613845825195
V
-1,0
BOT
0,54.2071666666667
V
0,1.36137008666992
V
-1,0
BOT
0,54.2138333333333
V
0,1.35612487792969
V
-1,0
BOT
0,54.2205
V
0,1.35278701782227
V
-1,0
BOT
0,54.2271666666667
V
0,1.35231018066406
V
-1,0
BOT
0,54.2338333333333
V
0,1.35231018066406
V
-1,0
BOT
0,54.2405
V
0,1.35231018066406
V
-1,0
BOT
0,54.2471666666667
V
0,1.35278701782227
V
-1,0
BOT
0,54.2538333333333
V
0,1.35469436645508
V
-1,0
BOT
0,54.2605
V
0,1.35612487792969
V
-1,0
BOT
0,54.2671666666667
V
0,1.35612487792969
V
-1,0
BOT
0,54.2738333333333
V
0,1.35707855224609
V
-1,0
BOT
0,54.2805
V
0,1.36184692382812
V
-1,0
BOT
0,54.2871666666667
V
0,1.36995315551758
V
-1,0
BOT
0,54.2938333333333
V
0,1.37901306152344
V
-1,0
BOT
0,54.3005
V
0,1.3885498046875
V
-1,0
BOT
0,54.3071666666667
V
0,1.39951705932617
V
-1,0
BOT
0,54.3138333333333
V
0,1.41000747680664
V
-1,0
BOT
0,54.3205
V
0,1.4185905456543
V
-1,0
BOT
0,54.3271666666667
V
0,1.42383575439453
V
-1,0
BOT
0,54.3338333333333
V
0,1.42574310302734
V
-1,0
BOT
0,54.3405
V
0,1.42526626586914
V
-1,0
BOT
0,54.3471666666667
V
0,1.42288208007812
V
-1,0
BOT
0,54.3538333333334
V
0,1.4195442199707
V
-1,0
BOT
0,54.3605
V
0,1.41525268554687
V
-1,0
BOT
0,54.3671666666667
V
0,1.41048431396484
V
-1,0
BOT
0,54.3738333333334
V
0,1.40619277954102
V
-1,0
BOT
0,54.3805
V
0,1.40237808227539
V
-1,0
BOT
0,54.3871666666667
V
0,1.39951705932617
V
-1,0
BOT
0,54.3938333333333
V
0,1.39713287353516
V
-1,0
BOT
0,54.4005
V
0,1.39617919921875
V
-1,0
BOT
0,54.4071666666667
V
0,1.39665603637695
V
-1,0
BOT
0,54.4138333333333
V
0,1.39856338500977
V
-1,0
BOT
0,54.4205
V
0,1.40094757080078
V
-1,0
BOT
0,54.4271666666667
V
0,1.40285491943359
V
-1,0
BOT
0,54.4338333333333
V
0,1.40476226806641
V
-1,0
BOT
0,54.4405
V
0,1.40571594238281
V
-1,0
BOT
0,54.4471666666667
V
0,1.40476226806641
V
-1,0
BOT
0,54.4538333333333
V
0,1.40237808227539
V
-1,0
BOT
0,54.4605
V
0,1.39856338500977
V
-1,0
BOT
0,54.4671666666667
V
0,1.39474868774414
V
-1,0
BOT
0,54.4738333333333
V
0,1.39045715332031
V
-1,0
BOT
0,54.4805
V
0,1.38616561889648
V
-1,0
BOT
0,54.4871666666667
V
0,1.38187408447266
V
-1,0
BOT
0,54.4938333333333
V
0,1.37662887573242
V
-1,0
BOT
0,54.5005
V
0,1.37186050415039
V
-1,0
BOT
0,54.5071666666667
V
0,1.36661529541016
V
-1,0
BOT
0,54.5138333333333
V
0,1.36184692382812
V
-1,0
BOT
0,54.5205
V
0,1.35660171508789
V
-1,0
BOT
0,54.5271666666667
V
0,1.35231018066406
V
-1,0
BOT
0,54.5338333333333
V
0,1.34992599487305
V
-1,0
BOT
0,54.5405
V
0,1.34897232055664
V
-1,0
BOT
0,54.5471666666667
V
0,1.34849548339844
V
-1,0
BOT
0,54.5538333333333
V
0,1.34801864624023
V
-1,0
BOT
0,54.5605
V
0,1.34754180908203
V
-1,0
BOT
0,54.5671666666667
V
0,1.34658813476562
V
-1,0
BOT
0,54.5738333333333
V
0,1.34563446044922
V
-1,0
BOT
0,54.5805
V
0,1.34420394897461
V
-1,0
BOT
0,54.5871666666667
V
0,1.3432502746582
V
-1,0
BOT
0,54.5938333333333
V
0,1.3427734375
V
-1,0
BOT
0,54.6005
V
0,1.3432502746582
V
-1,0
BOT
0,54.6071666666667
V
0,1.34468078613281
V
-1,0
BOT
0,54.6138333333333
V
0,1.34658813476562
V
-1,0
BOT
0,54.6205
V
0,1.34801864624023
V
-1,0
BOT
0,54.6271666666667
V
0,1.34944915771484
V
-1,0
BOT
0,54.6338333333333
V
0,1.34897232055664
V
-1,0
BOT
0,54.6405
V
0,1.34706497192383
V
-1,0
BOT
0,54.6471666666667
V
0,1.34372711181641
V
-1,0
BOT
0,54.6538333333333
V
0,1.34038925170898
V
-1,0
BOT
0,54.6605
V
0,1.33705139160156
V
-1,0
BOT
0,54.6671666666667
V
0,1.33371353149414
V
-1,0
BOT
0,54.6738333333333
V
0,1.33085250854492
V
-1,0
BOT
0,54.6805
V
0,1.32942199707031
V
-1,0
BOT
0,54.6871666666667
V
0,1.32942199707031
V
-1,0
BOT
0,54.6938333333334
V
0,1.32894515991211
V
-1,0
BOT
0,54.7005
V
0,1.3275146484375
V
-1,0
BOT
0,54.7071666666667
V
0,1.32465362548828
V
-1,0
BOT
0,54.7138333333333
V
0,1.32131576538086
V
-1,0
BOT
0,54.7205
V
0,1.31702423095703
V
-1,0
BOT
0,54.7271666666667
V
0,1.3127326965332
V
-1,0
BOT
0,54.7338333333333
V
0,1.30939483642578
V
-1,0
BOT
0,54.7405
V
0,1.30558013916016
V
-1,0
BOT
0,54.7471666666667
V
0,1.30224227905273
V
-1,0
BOT
0,54.7538333333334
V
0,1.29938125610352
V
-1,0
BOT
0,54.7605
V
0,1.29795074462891
V
-1,0
BOT
0,54.7671666666667
V
0,1.29604339599609
V
-1,0
BOT
0,54.7738333333334
V
0,1.29365921020508
V
-1,0
BOT
0,54.7805
V
0,1.29222869873047
V
-1,0
BOT
0,54.7871666666667
V
0,1.29175186157227
V
-1,0
BOT
0,54.7938333333333
V
0,1.29127502441406
V
-1,0
BOT
0,54.8005
V
0,1.29079818725586
V
-1,0
BOT
0,54.8071666666667
V
0,1.29032135009766
V
-1,0
BOT
0,54.8138333333333
V
0,1.28936767578125
V
-1,0
BOT
0,54.8205
V
0,1.28746032714844
V
-1,0
BOT
0,54.8271666666667
V
0,1.28507614135742
V
-1,0
BOT
0,54.8338333333333
V
0,1.28269195556641
V
-1,0
BOT
0,54.8405
V
0,1.2812614440918
V
-1,0
BOT
0,54.8471666666667
V
0,1.27887725830078
V
-1,0
BOT
0,54.8538333333333
V
0,1.27696990966797
V
-1,0
BOT
0,54.8605
V
0,1.27458572387695
V
-1,0
BOT
0,54.8671666666667
V
0,1.27220153808594
V
-1,0
BOT
0,54.8738333333333
V
0,1.26838684082031
V
-1,0
BOT
0,54.8805
V
0,1.26361846923828
V
-1,0
BOT
0,54.8871666666667
V
0,1.26075744628906
V
-1,0
BOT
0,54.8938333333333
V
0,1.26028060913086
V
-1,0
BOT
0,54.9005
V
0,1.26075744628906
V
-1,0
BOT
0,54.9071666666667
V
0,1.26218795776367
V
-1,0
BOT
0,54.9138333333333
V
0,1.26504898071289
V
-1,0
BOT
0,54.9205
V
0,1.26981735229492
V
-1,0
BOT
0,54.9271666666667
V
0,1.27363204956055
V
-1,0
BOT
0,54.9338333333333
V
0,1.27744674682617
V
-1,0
BOT
0,54.9405
V
0,1.2812614440918
V
-1,0
BOT
0,54.9471666666667
V
0,1.28507614135742
V
-1,0
BOT
0,54.9538333333333
V
0,1.28841400146484
V
-1,0
BOT
0,54.9605
V
0,1.29222869873047
V
-1,0
BOT
0,54.9671666666667
V
0,1.2965202331543
V
-1,0
BOT
0,54.9738333333333
V
0,1.30128860473633
V
-1,0
BOT
0,54.9805
V
0,1.30653381347656
V
-1,0
BOT
0,54.9871666666667
V
0,1.3117790222168
V
-1,0
BOT
0,54.9938333333333
V
0,1.31559371948242
V
-1,0
BOT
0,55.0005
V
0,1.31750106811523
V
-1,0
BOT
0,55.0071666666667
V
0,1.31845474243164
V
-1,0
BOT
0,55.0138333333333
V
0,1.31893157958984
V
-1,0
BOT
0,55.0205
V
0,1.31988525390625
V
-1,0
BOT
0,55.0271666666667
V
0,1.31940841674805
V
-1,0
BOT
0,55.0338333333333
V
0,1.31750106811523
V
-1,0
BOT
0,55.0405
V
0,1.31464004516602
V
-1,0
BOT
0,55.0471666666667
V
0,1.31034851074219
V
-1,0
BOT
0,55.0538333333333
V
0,1.30558013916016
V
-1,0
BOT
0,55.0605
V
0,1.29985809326172
V
-1,0
BOT
0,55.0671666666667
V
0,1.29508972167969
V
-1,0
BOT
0,55.0738333333334
V
0,1.29270553588867
V
-1,0
BOT
0,55.0805
V
0,1.29222869873047
V
-1,0
BOT
[truncated: 35,392 more chars]
